# Supplementary material for: Nitric oxide acts as a cotransmitter in a subset of dopaminergic neurons to diversify memory dynamics
Source: eLife journal article supplement (doi:10.7554/elife.49257), 2019-11-14

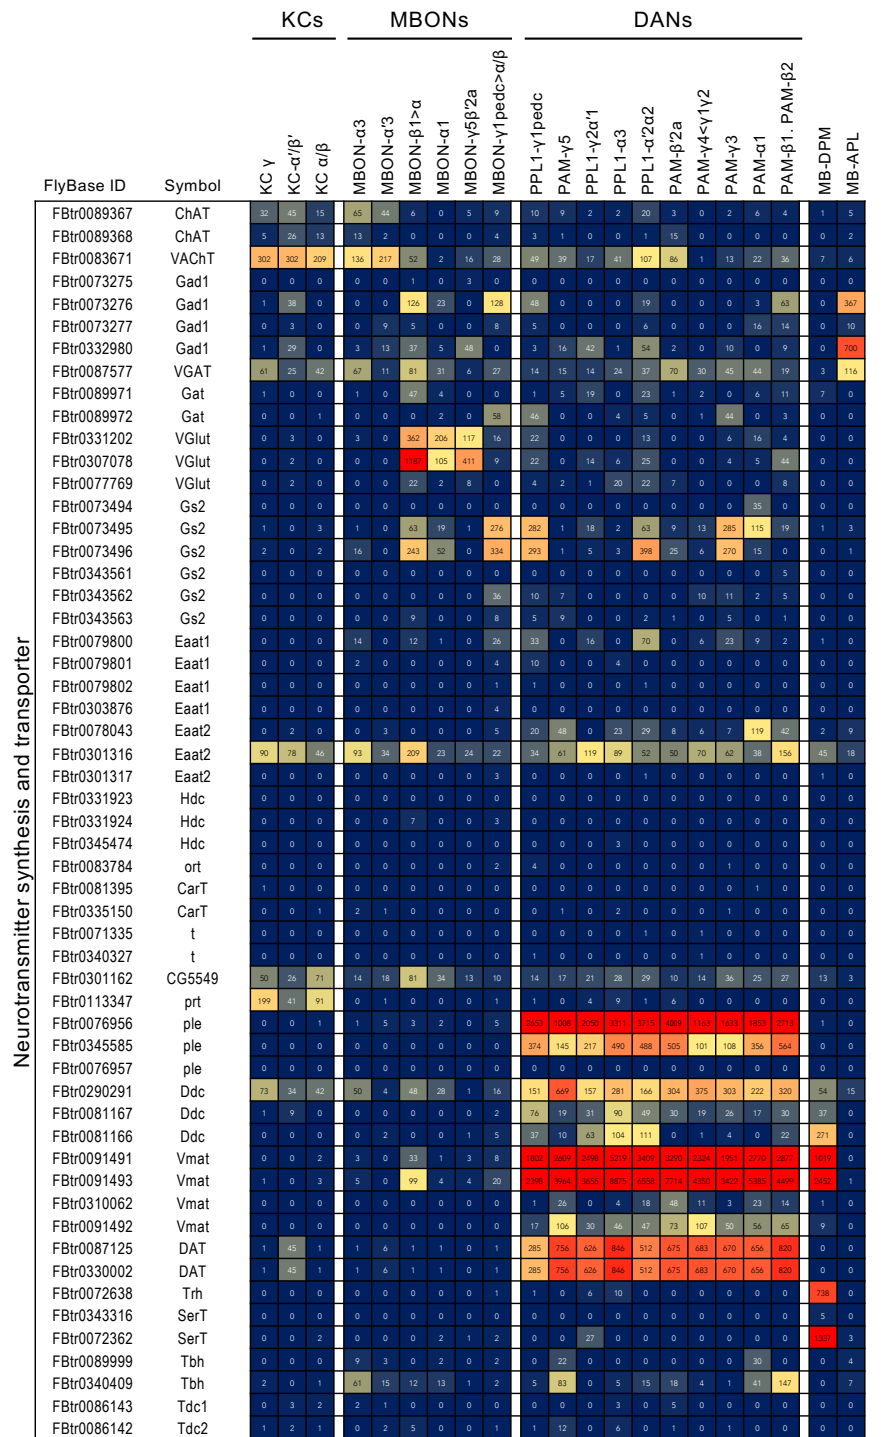

Figure 3- figure supplement 2

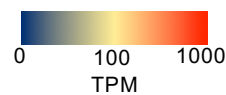

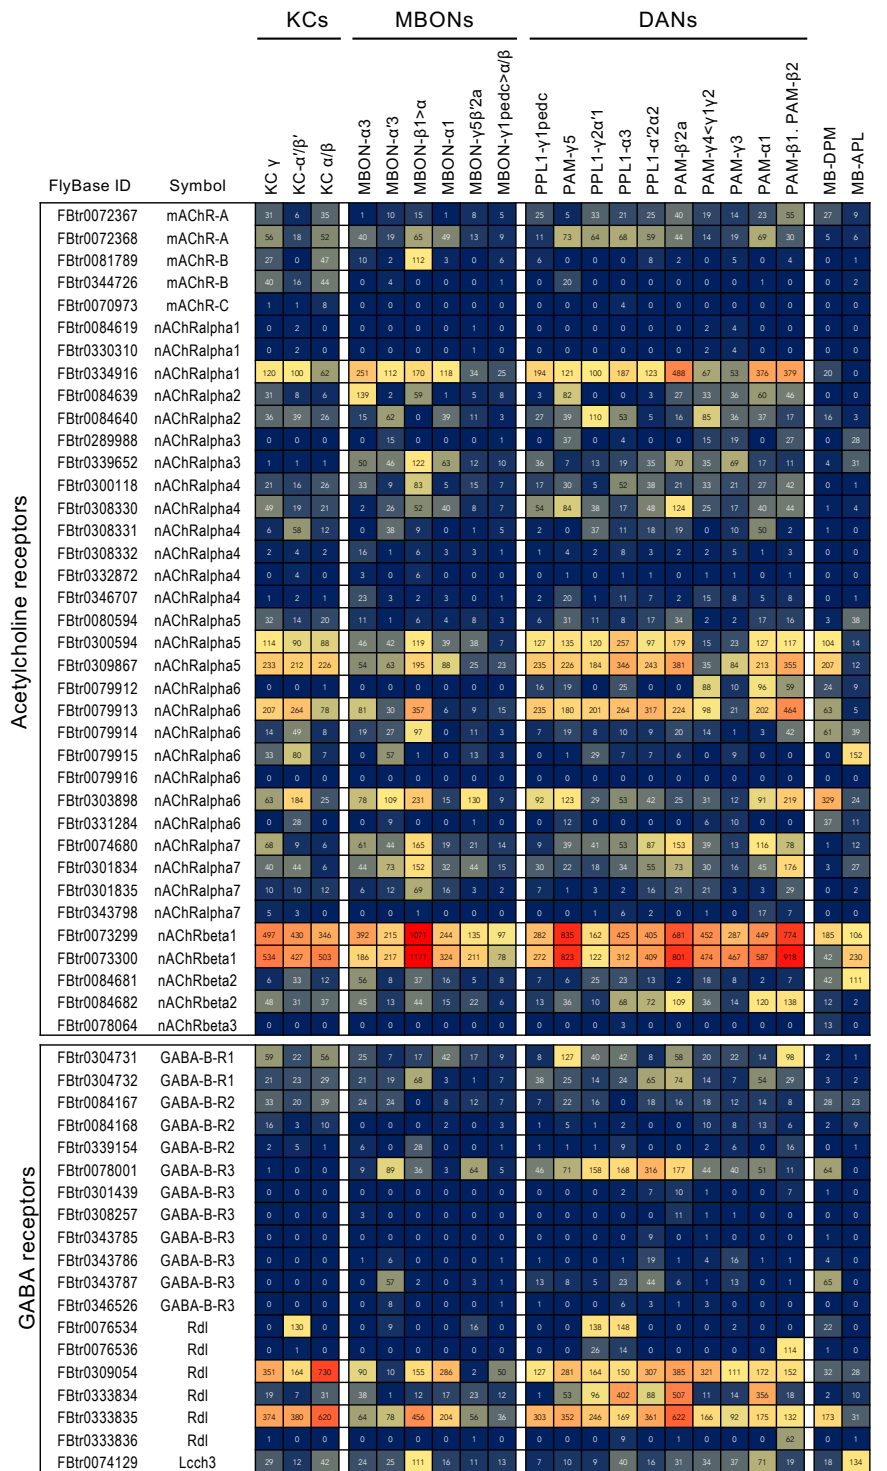

Figure 3- figure supplement 2

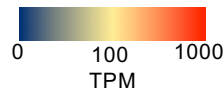

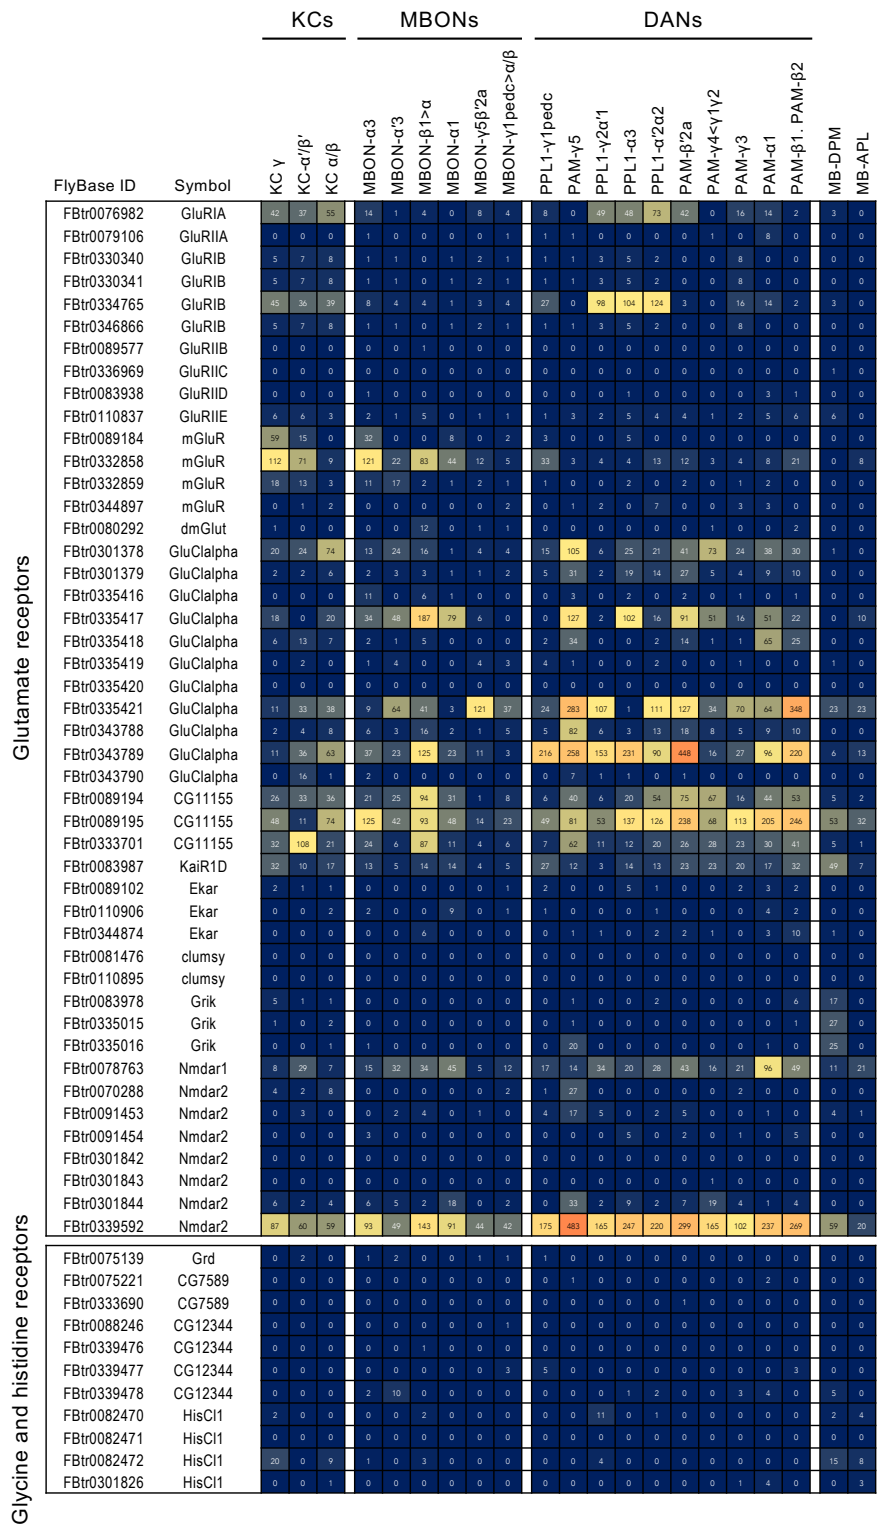

Figure 3- figure supplement 2

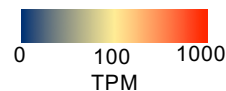

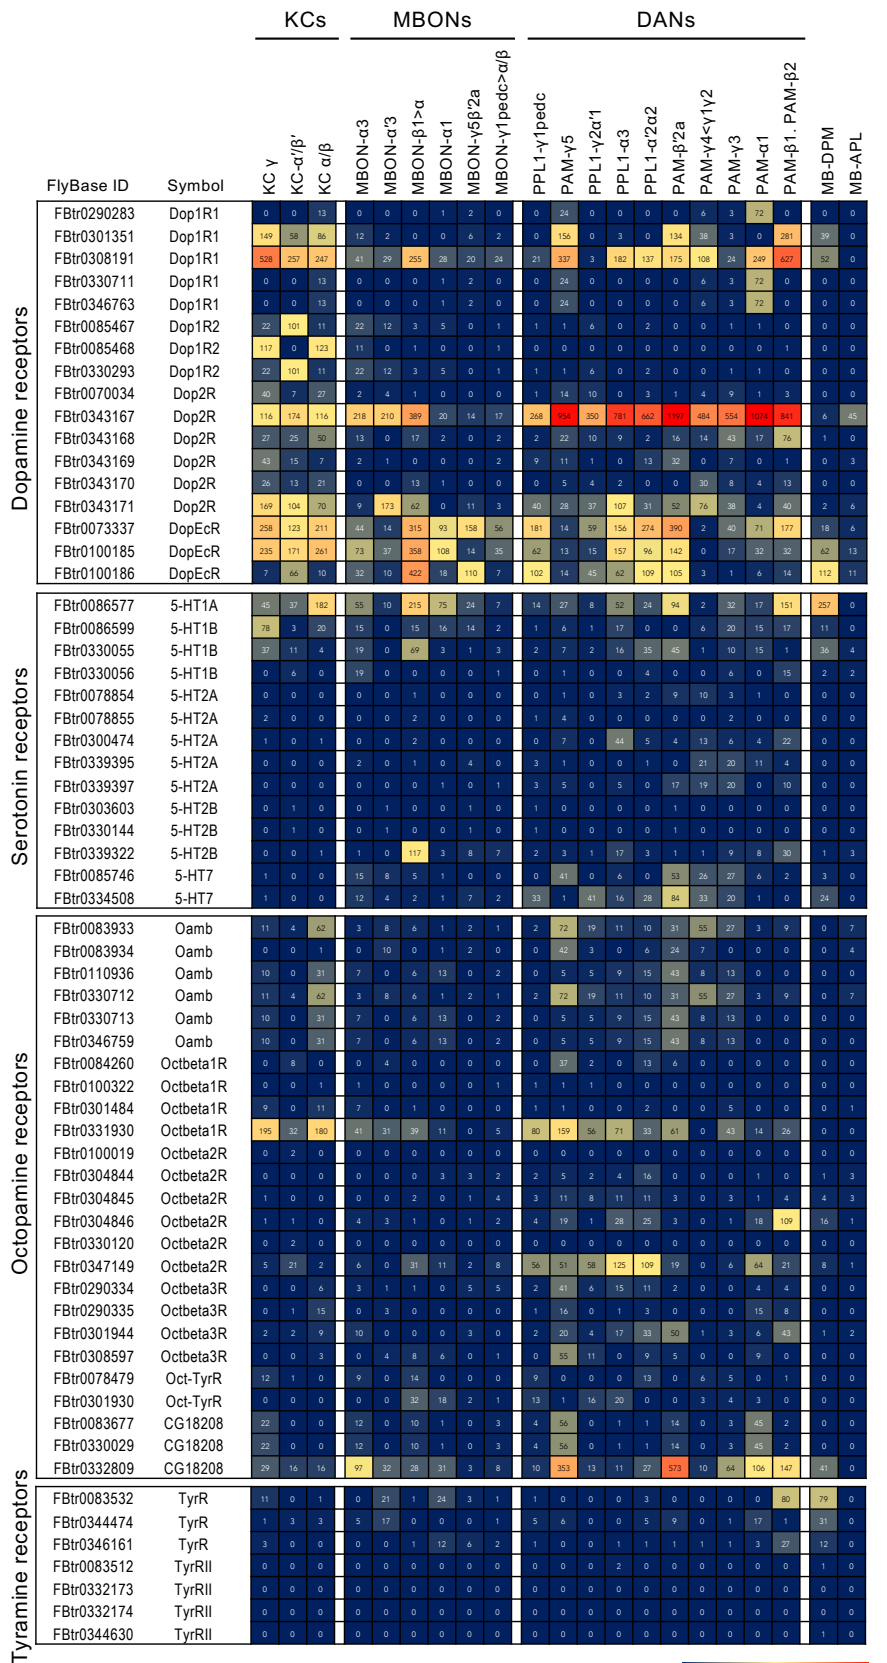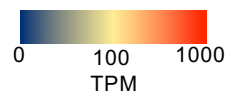

Figure 3- figure supplement 2

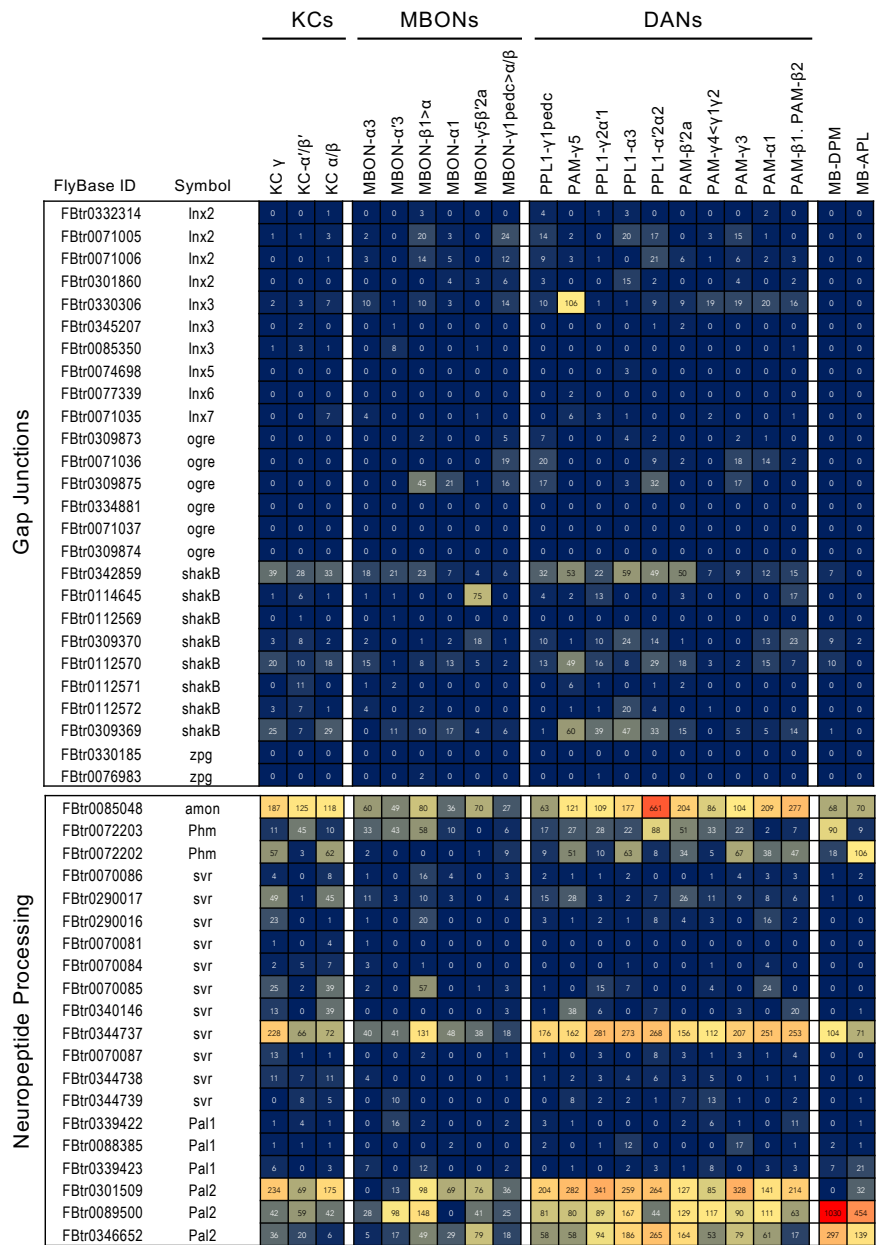

Figure 3- figure supplement 2

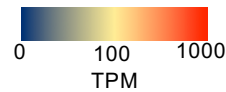

Neuropeptide #1

|            |         | KCs         |                     |                   | MBONs            |                  |                        |                  |                               |                                          | DANs                        |                 |                          |                  |                          |                      |                                  |                 |                 |                                 |        |        |
|------------|---------|-------------|---------------------|-------------------|------------------|------------------|------------------------|------------------|-------------------------------|------------------------------------------|-----------------------------|-----------------|--------------------------|------------------|--------------------------|----------------------|----------------------------------|-----------------|-----------------|---------------------------------|--------|--------|
| FlyBase ID | Symbol  | KC $\gamma$ | KC $\alpha'/\beta'$ | KC $\alpha/\beta$ | MBON- $\alpha 3$ | MBON- $\alpha'3$ | MBON- $\beta 1>\alpha$ | MBON- $\alpha 1$ | MBON- $\gamma 5\beta 2\alpha$ | MBON- $\gamma 1\text{pedc}>\alpha/\beta$ | PPL1- $\gamma 1\text{pedc}$ | PAM- $\gamma 5$ | PPL1- $\gamma 2\alpha'1$ | PPL1- $\alpha 3$ | PPL1- $\alpha'2\alpha 2$ | PAM- $\beta 2\alpha$ | PAM- $\gamma 4<\gamma 1\gamma 2$ | PAM- $\gamma 3$ | PAM- $\alpha 1$ | PAM- $\beta 1$ , PAM- $\beta 2$ | MB-DPM | MB-APL |
| FBr0073213 | Akh     | 2           | 0                   | 0                 | 7                | 0                | 11                     | 0                | 0                             | 1                                        | 1                           | 0               | 0                        | 1                | 0                        | 0                    | 3                                | 14              | 0               | 1                               | 0      | 0      |
| FBr0074802 | amn     | 34          | 16                  | 41                | 10               | 80               | 35                     | 20               | 3                             | 4                                        | 17                          | 169             | 20                       | 66               | 44                       | 168                  | 49                               | 40              | 35              | 36                              | 3      | 0      |
| FBr0084744 | AstA    | 1           | 0                   | 0                 | 0                | 0                | 1                      | 0                | 0                             | 0                                        | 1                           | 0               | 0                        | 0                | 0                        | 0                    | 0                                | 0               | 0               | 0                               | 3      | 1      |
| FBr0346367 | AstA    | 1           | 0                   | 0                 | 0                | 0                | 73                     | 0                | 1                             | 1                                        | 6                           | 0               | 0                        | 0                | 0                        | 0                    | 0                                | 0               | 0               | 0                               | 0      | 4      |
| FBr0301761 | AstC    | 0           | 0                   | 0                 | 0                | 9                | 0                      | 0                | 0                             | 1                                        | 1                           | 0               | 0                        | 0                | 0                        | 1                    | 8                                | 0               | 0               | 0                               | 0      | 0      |
| FBr0080234 | AstC    | 0           | 0                   | 0                 | 0                | 34               | 0                      | 0                | 0                             | 1                                        | 2                           | 0               | 0                        | 0                | 4                        | 0                    | 14                               | 0               | 0               | 0                               | 0      | 0      |
| FBr0084131 | Burs    | 2           | 5                   | 1                 | 3                | 0                | 0                      | 0                | 0                             | 1                                        | 0                           | 0               | 0                        | 0                | 0                        | 1                    | 0                                | 3               | 0               | 1                               | 1      | 0      |
| FBr0085514 | Capa    | 0           | 0                   | 0                 | 0                | 0                | 17                     | 0                | 0                             | 0                                        | 0                           | 0               | 0                        | 0                | 8                        | 0                    | 0                                | 0               | 0               | 0                               | 1      | 0      |
| FBr0084333 | CCAP    | 0           | 0                   | 0                 | 0                | 0                | 0                      | 0                | 0                             | 0                                        | 0                           | 0               | 0                        | 0                | 0                        | 0                    | 0                                | 0               | 0               | 0                               | 0      | 0      |
| FBr0335007 | CCAP    | 0           | 0                   | 0                 | 0                | 0                | 0                      | 0                | 0                             | 0                                        | 0                           | 0               | 0                        | 0                | 0                        | 0                    | 0                                | 0               | 0               | 0                               | 0      | 0      |
| FBr0113232 | CCHa1   | 0           | 0                   | 0                 | 0                | 0                | 5                      | 0                | 0                             | 0                                        | 1                           | 0               | 0                        | 0                | 2                        | 0                    | 0                                | 0               | 0               | 0                               | 0      | 0      |
| FBr0303262 | CCHa2   | 0           | 0                   | 0                 | 0                | 0                | 0                      | 0                | 0                             | 0                                        | 0                           | 0               | 0                        | 0                | 0                        | 0                    | 0                                | 0               | 0               | 0                               | 0      | 0      |
| FBr0303263 | CCHa2   | 2           | 0                   | 0                 | 0                | 0                | 12                     | 0                | 0                             | 0                                        | 0                           | 0               | 0                        | 0                | 0                        | 0                    | 0                                | 0               | 0               | 0                               | 0      | 0      |
| FBr0082762 | CCHa2   | 0           | 0                   | 0                 | 0                | 0                | 0                      | 0                | 0                             | 0                                        | 0                           | 0               | 0                        | 6                | 0                        | 0                    | 0                                | 0               | 0               | 1                               | 4      |        |
| FBr0302488 | CG10738 | 0           | 0                   | 7                 | 0                | 0                | 0                      | 0                | 0                             | 0                                        | 0                           | 7               | 0                        | 0                | 0                        | 0                    | 4                                | 0               | 0               | 0                               | 0      | 0      |
| FBr0304791 | CG10738 | 0           | 0                   | 10                | 0                | 0                | 0                      | 0                | 0                             | 0                                        | 0                           | 27              | 0                        | 4                | 0                        | 10                   | 20                               | 0               | 18              | 0                               | 0      | 0      |
| FBr0302487 | CG10738 | 1           | 0                   | 4                 | 0                | 0                | 0                      | 0                | 0                             | 0                                        | 0                           | 0               | 0                        | 0                | 0                        | 4                    | 0                                | 0               | 0               | 0                               | 0      | 0      |
| FBr0304792 | CG10738 | 1           | 0                   | 4                 | 2                | 0                | 0                      | 1                | 0                             | 1                                        | 1                           | 10              | 12                       | 1                | 0                        | 36                   | 4                                | 12              | 0               | 0                               | 0      | 2      |
| FBr0290085 | CG17777 | 0           | 0                   | 0                 | 0                | 0                | 0                      | 0                | 0                             | 0                                        | 0                           | 0               | 0                        | 0                | 0                        | 0                    | 0                                | 0               | 0               | 0                               | 0      | 0      |
| FBr0110944 | CG34136 | 6           | 8                   | 7                 | 23               | 0                | 19                     | 17               | 1                             | 16                                       | 18                          | 24              | 1                        | 3                | 18                       | 33                   | 8                                | 4               | 52              | 35                              | 80     | 5      |
| FBr0305048 | CG43117 | 4           | 0                   | 1                 | 2                | 0                | 6                      | 0                | 0                             | 4                                        | 1                           | 52              | 0                        | 0                | 3                        | 10                   | 0                                | 0               | 10              | 0                               | 0      | 1      |
| FBr0077957 | CG4577  | 188         | 46                  | 278               | 111              | 8                | 262                    | 199              | 115                           | 63                                       | 187                         | 155             | 179                      | 227              | 424                      | 152                  | 170                              | 107             | 321             | 386                             | 426    | 9      |
| FBr0332271 | CG4577  | 32          | 54                  | 46                | 21               | 7                | 64                     | 14               | 74                            | 9                                        | 160                         | 18              | 89                       | 115              | 156                      | 58                   | 40                               | 17              | 157             | 142                             | 335    | 12     |
| FBr0300713 | CNMa    | 0           | 0                   | 0                 | 0                | 0                | 0                      | 0                | 0                             | 0                                        | 0                           | 0               | 0                        | 0                | 0                        | 0                    | 0                                | 0               | 0               | 0                               | 0      | 0      |
| FBr0303155 | CNMa    | 1           | 0                   | 0                 | 0                | 0                | 0                      | 0                | 1                             | 0                                        | 0                           | 0               | 0                        | 0                | 0                        | 0                    | 0                                | 9               | 0               | 0                               | 0      | 0      |
| FBr0332672 | CNMa    | 1           | 0                   | 0                 | 0                | 0                | 0                      | 10               | 0                             | 0                                        | 0                           | 0               | 0                        | 0                | 0                        | 0                    | 0                                | 0               | 0               | 0                               | 0      | 0      |
| FBr0082927 | Crz     | 0           | 0                   | 0                 | 0                | 0                | 1                      | 0                | 0                             | 1                                        | 1                           | 0               | 0                        | 0                | 0                        | 0                    | 1                                | 1               | 0               | 0                               | 0      | 0      |
| FBr0079699 | Dh31    | 0           | 0                   | 0                 | 0                | 2                | 0                      | 0                | 2                             | 3                                        | 0                           | 9               | 1                        | 0                | 5                        | 0                    | 0                                | 0               | 0               | 0                               | 0      | 0      |
| FBr0079700 | Dh31    | 0           | 0                   | 2                 | 0                | 0                | 101                    | 0                | 5                             | 7                                        | 5                           | 0               | 0                        | 2                | 29                       | 0                    | 8                                | 0               | 3               | 2                               | 0      | 0      |
| FBr0344343 | Dh44    | 0           | 0                   | 0                 | 6                | 43               | 2                      | 0                | 1                             | 4                                        | 356                         | 2               | 4                        | 2                | 17                       | 4                    | 7                                | 0               | 1               | 25                              | 30     | 0      |
| FBr0082080 | Dh44    | 0           | 0                   | 0                 | 0                | 0                | 0                      | 0                | 0                             | 0                                        | 2                           | 0               | 0                        | 0                | 0                        | 9                    | 35                               | 0               | 0               | 0                               | 1      | 0      |
| FBr0078989 | Dsk     | 0           | 0                   | 0                 | 0                | 0                | 0                      | 0                | 0                             | 1                                        | 0                           | 0               | 0                        | 0                | 0                        | 0                    | 0                                | 0               | 1               | 0                               | 0      | 0      |
| FBr0334930 | Eh      | 0           | 0                   | 0                 | 0                | 0                | 0                      | 0                | 0                             | 0                                        | 0                           | 0               | 0                        | 0                | 12                       | 0                    | 0                                | 0               | 0               | 366                             | 0      | 0      |
| FBr0083444 | Eh      | 0           | 0                   | 0                 | 0                | 0                | 0                      | 0                | 0                             | 0                                        | 0                           | 0               | 0                        | 0                | 0                        | 0                    | 0                                | 0               | 0               | 53                              | 0      | 0      |
| FBr0072426 | ETH     | 0           | 0                   | 0                 | 0                | 0                | 0                      | 0                | 0                             | 1                                        | 0                           | 0               | 0                        | 0                | 0                        | 0                    | 0                                | 0               | 6               | 0                               | 0      | 0      |
| FBr0088383 | FMRFa   | 3           | 0                   | 14                | 0                | 1                | 0                      | 0                | 0                             | 0                                        | 0                           | 6               | 0                        | 0                | 0                        | 0                    | 2                                | 0               | 1               | 0                               | 0      | 0      |
| FBr0304153 | Gpa2    | 0           | 0                   | 0                 | 0                | 0                | 0                      | 0                | 0                             | 0                                        | 0                           | 0               | 0                        | 0                | 0                        | 0                    | 0                                | 0               | 0               | 0                               | 0      | 0      |
| FBr0332975 | Gpb5    | 1           | 0                   | 0                 | 0                | 0                | 0                      | 4                | 0                             | 0                                        | 0                           | 0               | 0                        | 0                | 0                        | 2                    | 2                                | 0               | 0               | 0                               | 0      | 27     |
| FBr0113776 | Gpb5    | 10          | 0                   | 1                 | 8                | 0                | 55                     | 0                | 1                             | 8                                        | 2                           | 0               | 0                        | 5                | 0                        | 5                    | 3                                | 3               | 2               | 6                               | 4      | 2      |
| FBr0113777 | Gpb5    | 4           | 0                   | 2                 | 0                | 0                | 0                      | 0                | 7                             | 1                                        | 12                          | 2               | 1                        | 0                | 12                       | 0                    | 2                                | 24              | 0               | 7                               | 3      | 1      |

Figure 3- figure supplement 2

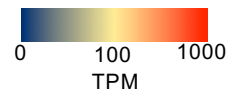

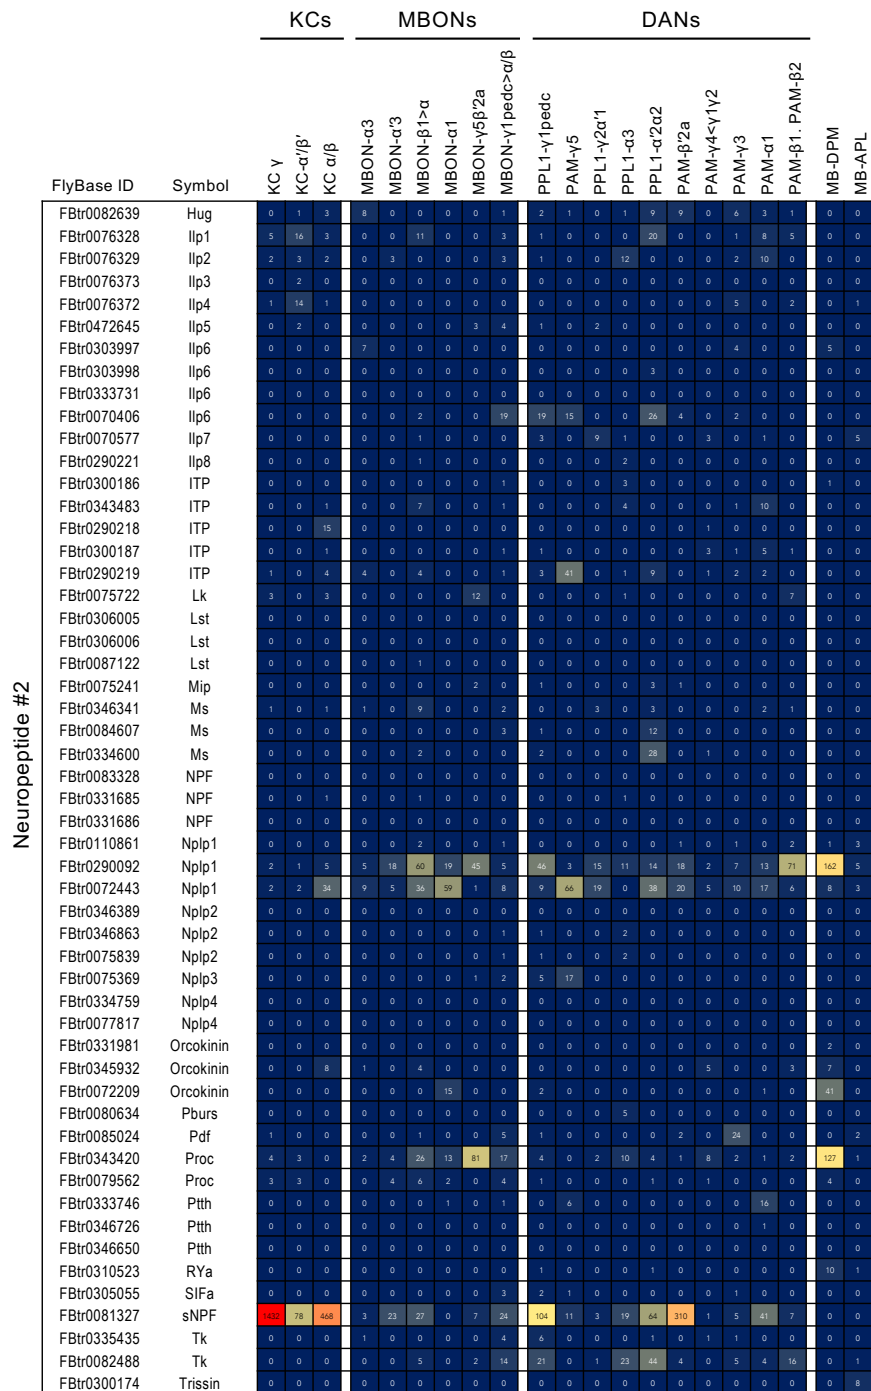

Figure 3- figure supplement 2

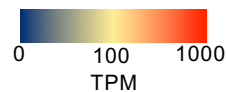

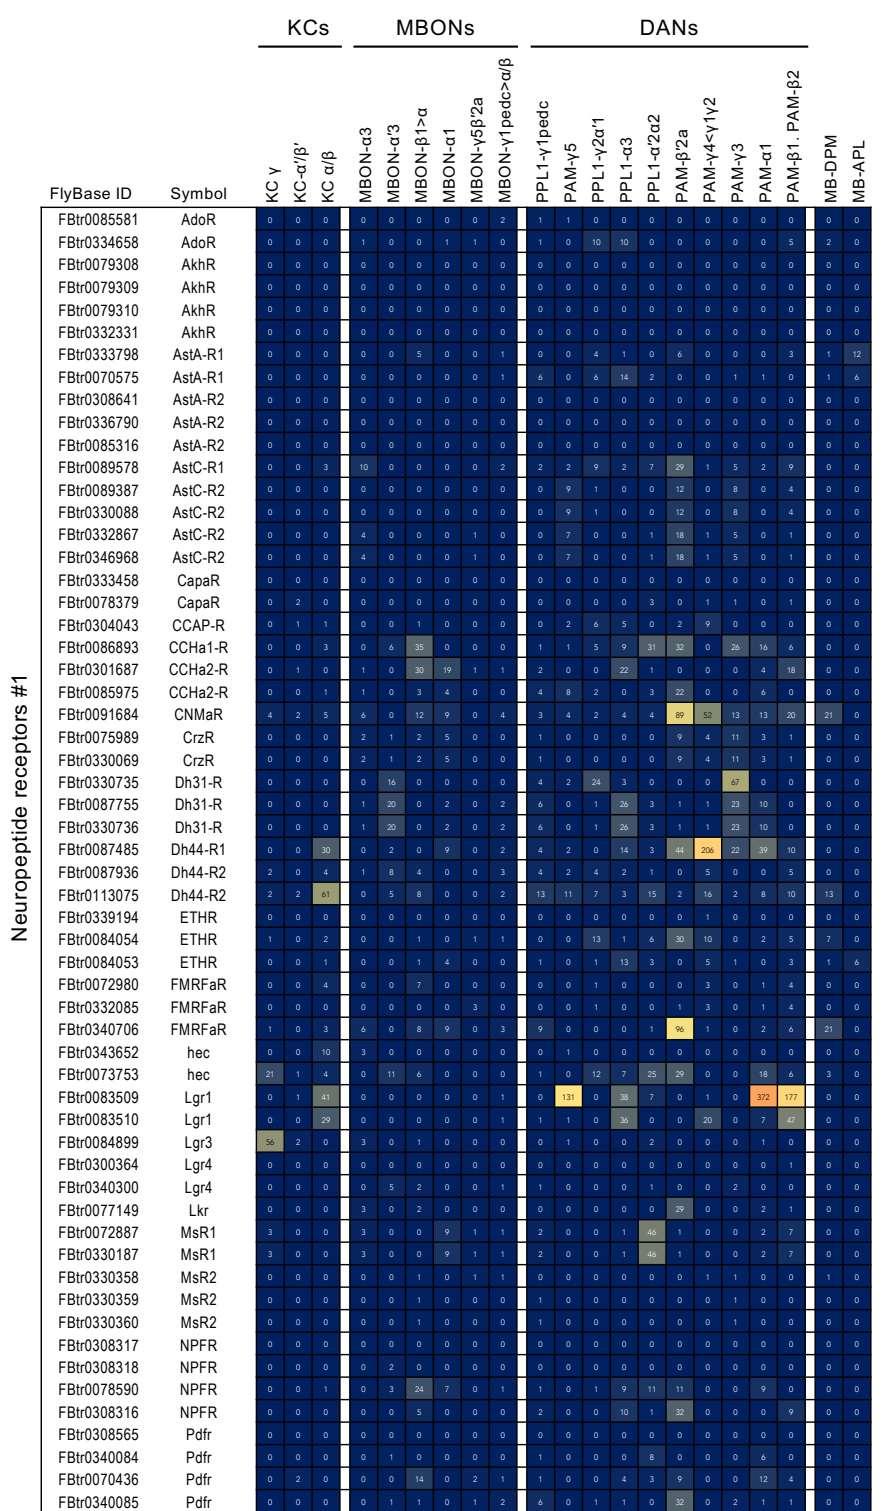

Figure 3- figure supplement 2

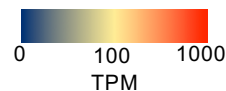

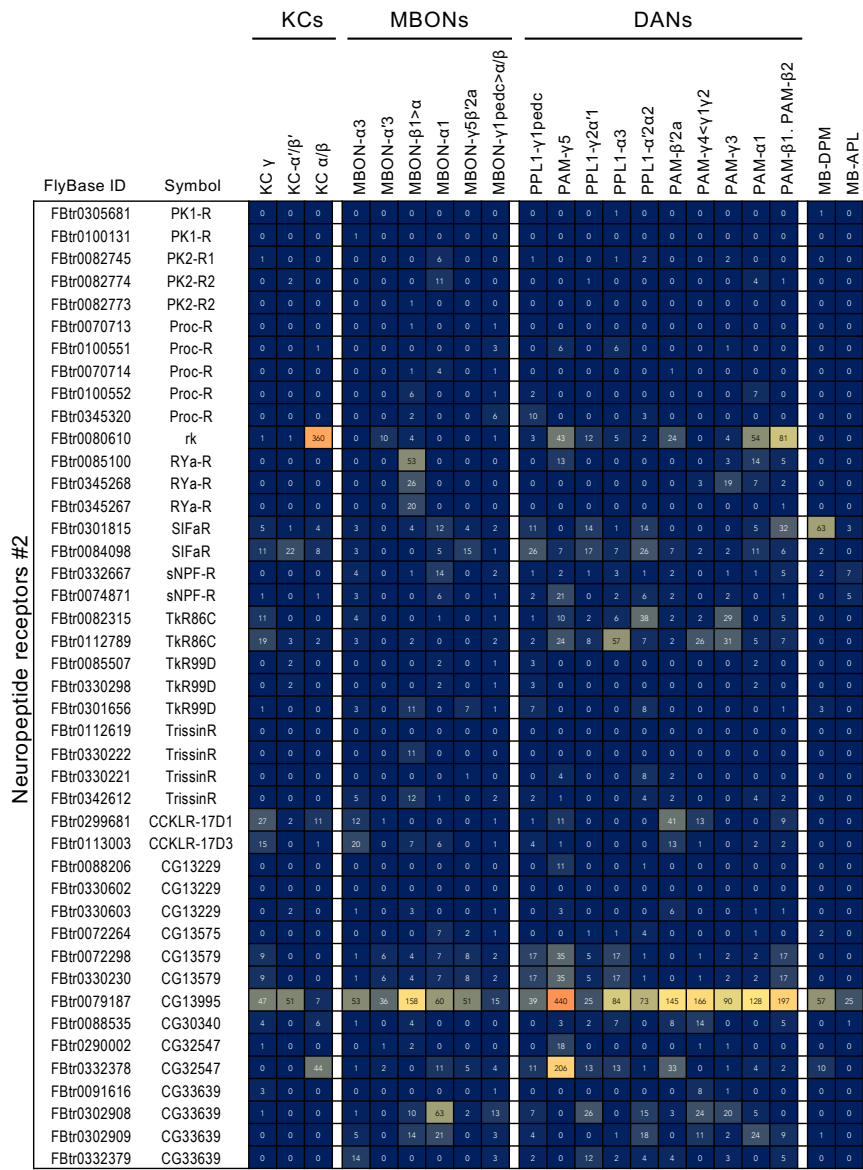

Figure 3- figure supplement 2

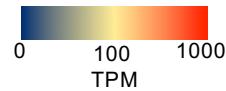

Supplement: supp [file elife-49257-supp-v1.zip]
