# Supplementary material for: Nitric oxide acts as a cotransmitter in a subset of dopaminergic neurons to diversify memory dynamics
Source: eLife journal article supplement (doi:10.7554/elife.49257), 2019-11-14
Supplement: supp [file elife-49257-supp-v1.zip]

Archive with 17 entries (17 files):
- elife_poa_e49257_Figure_1_figure_supplement_2.pdf
- elife_poa_e49257_Figure_8_figure_supplement_1.pdf
- elife_poa_e49257_Figure_8_figure_supplement_2.pdf
- elife_poa_e49257_Supplementary_file_3.docx
- elife_poa_e49257_Figure_4_figure_supplement_1.pdf
- elife_poa_e49257_Transparent_Reporting_File.docx
- elife_poa_e49257_Supplementary_file_2.docx
- elife_poa_e49257_Supplementary_file_1.xlsx
- elife_poa_e49257_Figure_3_figure_supplement_2.pdf
- elife_poa_e49257_Figure_3_figure_supplement_1.pdf
- elife_poa_e49257_Figure_1_figure_supplement_1.pdf
- elife_poa_e49257_Figure_5_figure_supplement_1.pdf
- elife_poa_e49257_Figure_2_figure_supplement_1.pdf
- elife_poa_e49257_Figure_5_figure_supplement_3.pdf
- elife_poa_e49257_Figure_5_figure_supplement_2.pdf
- elife_poa_e49257_Figure_6_figure_supplement_1.pdf
- elife_poa_e49257_Video_1.mov
