# Supplementary material for: Nitric oxide acts as a cotransmitter in a subset of dopaminergic neurons to diversify memory dynamics
Source: eLife journal article supplement (doi:10.7554/elife.49257), 2019-11-14
Supplement: supp1 [file elife-49257-supp1-v2.xlsx]

## Sheet: TPM
						Driver Line	MB623C	MB623C	MB623C	MB005C	MB005C	MB005C	MB005C	MB008C	MB008C	MB008C		SS01248	SS01248	MB315C	MB315C	MB315C	MB315C	MB296B	MB296B	MB296B	SS01399	SS01399	MB058B	MB058B	MB109B	MB109B	MB109B	MB312C	MB312C	MB312C	MB441B	MB441B	MB441B	MB043C	MB043C	MB213B	MB213B	NP2631-GH146-flp	NP2631-GH146-flp	NP2631-GH146-flp	NP2631-GH146-flp	NP2631-GH146-flp	SS01240
						Reporter	nlstdTomato	nlstdTomato	nlstdTomato	nlstdTomato	nlstdTomato	nlstdTomato	nlstdTomato	nlstdTomato	nlstdTomato	nlstdTomato		nlstdTomato	mCD8::GFP	nlstdTomato	nlstdTomato	nlstdTomato	nlstdTomato	unc84-GFP	unc84-GFP	unc84-GFP	mCD8::GFP	mCD8::GFP	nlstdTomato	nlstdTomato	nlstdTomato	nlstdTomato	nlstdTomato	nlstdTomato	nlstdTomato	nlstdTomato	nlstdTomato	nlstdTomato	nlstdTomato	nlstdTomato	nlstdTomato	nlstdTomato	nlstdTomato	mCD8::GFP	mCD8::GFP	mCD8::GFP	mCD8::GFP	mCD8::GFP	nlstdTomato
						Sex	F	F	F	F	F	F	F	F	F	F		F	F	F	F	F	F	F	F	F	F	F	F	F	F	F	F	F	F	F	F	F	F	F	F	F	F
						PID	20_1_1	20_1_2	20_1_3	20_11_2	20_11_3	20_11_4	20_11_5	20_1_4	20_1_5	20_1_6		15_12_6	19_4_6	15_10_8	19_4_1	19_9_1	19_9_2	19_5_1	19_4_7	19_4_8	19_4_5	15_10_7	15_10_5	16_9_7	15_12_5	16_9_8	19_4_3	15_12_4	19_9_3	19_9_4	19_9_5	19_9_6	15_10_6	14_10_5	19_4_4	14_10_4	19_4_2	YoshiWGB_1	YoshiWGB_2	YoshiWGB_3	YoshiWGB_4	YoshiWGB_5	20_12_1
						Sorting	FACS	FACS	FACS	FACS	FACS	FACS	FACS	FACS	FACS	FACS		Hand	Hand	Hand	Hand	Hand	Hand	FACS	Hand	Hand	FACS	Hand	Hand	Hand	Hand	Hand	Hand	Hand	FACS	FACS	FACS	FACS	Hand	Hand	Hand	Hand	Hand	Hnad	Hand	Hand	Hand	Hand	Hand
						Number of sorted cells	2500	2500	2500	1000	1000	1000	1000	2500	2500	2500		396	358	266	390	722	766	289	285	279	462	252	284	284	442	274	405	378	703	629	600	570	280	1048	385	1048	381	28	20	28	25	36	130
						µg cDNA	5.283	5.901	4.866	2.76	1.35	1.56	2.25	5.085	3.222	3.99		6.62	3.27	0.85	2.13	4.38	3.64	2.82	3.78	2.91	2.75	2.84	2.21	2.5	2.6	0.96	2.25	3.64	3.35	2.57	3.53	3.81	3.47	3.21	2.07	4.25	2.56	3.96	4.82	5.24	8	5.66	3.75
						nM Kapa	4.57495	5.04082	3.89361	6.37	3.22	4.23	5.25	5.16566	2.74113	4.71313		9.73	2.23	1.91	2.98	7.32	5.94	2.48	2.4	2.04	1.53	6.83	5.48	2.82	5.32	3.24	2.68	3.77	6.08	4.1	4.04	5.01	4.77	5.09	2.24	5.77	2.81	12.25	32.81	25.79	22.64	33.72	5.62
						instrument	NextSeq	NextSeq	NextSeq	NextSeq	NextSeq	NextSeq	NextSeq	NextSeq	NextSeq	NextSeq		HiSeq	NextSeq	HiSeq	NextSeq	NextSeq	NextSeq	NextSeq	NextSeq	NextSeq	NextSeq	HiSeq	HiSeq	HiSeq	HiSeq	HiSeq	NextSeq	HiSeq	NextSeq	NextSeq	NextSeq	NextSeq	HiSeq	HiSeq	NextSeq	HiSeq	NextSeq	MiniSeq	MiniSeq	MiniSeq	MiniSeq	MiniSeq	NextSeq
						s-/p-end	paired	paired	paired	paired	paired	paired	paired	paired	paired	paired		single	paired	single	paired	paired	paired	paired	paired	paired	paired	single	single	single	single	single	paired	single	paired	paired	paired	paired	single	single	paired	single	paired	paired	paired	paired	paired	paired	paired
						mapped reads	2.55108e+07	2.4748e+07	2.2927e+07	21999467	24616999	24148219	21147743	1.93528e+07	2.43294e+07	2.19953e+07		3.38498e+07	2.03827e+07	1.68827e+07	1.56012e+07	1.97248e+07	2.18733e+07	1.90803e+07	2.97324e+07	2.14704e+07	2.03715e+07	2.03049e+07	1.97689e+07	3.5874e+07	23694401	28865618	15812905	23521273	19967290	19438798	2.17095e+07	2.43533e+07	2.21115e+07	2.63402e+07	1.52349e+07	2.42795e+07	1.54757e+07	2150518	1690146	2076466	2271671	1688346	15773558
						genes (n>0)	10628	10757	9886	11923	7951	9862	11499	9883	8089	9789		11758	6315	5846	4999	8735	7403	5863	7659	5683	5612	9596	7836	9331	8908	6142	5557	9924	8600	6471	8056	7802	8958	9063	5096	9828	5012	9311	9424	10145	11473	9833	10884
						genes (n>1)	10140	10252	9379	9459	6179	7692	9197	9407	7679	9325		11066	5899	5496	4606	8326	7034	5344	7197	5259	5220	9186	7426	8855	8414	5385	5165	9478	8215	6076	7705	7458	8600	8695	4755	9411	4628	7511	7531	8085	9431	7766	8028
						genes (n≥10)	8505	8625	7965	5209	3649	4466	5242	7960	6610	7861		8992	4883	4843	3886	7146	6126	4329	5962	4350	4371	7834	6399	7559	7277	4516	4343	8129	7101	5167	6687	6500	7448	7667	4022	8207	3930	3508	3328	3621	4202	3365	4147
current_symbol	full_name	FlyBase ID (transcript_id)	gene_id	length (nt)	GO_terms	Cell type	KC-γ			KC-α′/β′				KC-α/β				PPL1-γ1pedc		PAM-γ5				PPL1-γ2 α′1			PPL1-α3		PPL1-α′2α2		PAM-β′2a			PAM-γ4<γ1γ2			PAM-γ3			PAM-α1		PMA-β1, PAM-β2		MB-APL					MB-DPM
		DQ459430	ERCC-00002	1061			288.64	293.77	461.83	14661.1	47744	31391.7	24094.2	707.77	1478.94	509.76		43.52	193.01	6037.52	3260.53	1375.19	2830.48	541.73	466.55	134.48	394.79	535.84	430.17	172.07	2250.87	581.41	2407.9	1038.24	796.28	4130.77	2407.54	2849.37	2149.14	2353.59	1485.56	2062.03	170.88	270.88	726.14	470.72	495.69	130.45	130.11
		DQ516784	ERCC-00003	1023			33.52	29.57	55.61	981.75	5357.25	2137.48	1381.15	56.12	122.49	50.98		4.96	146.59	3290.45	1289.96	81.4	234.15	87.87	110.73	58.6	62.53	501.34	427.2	50.27	882.64	1156.55	702.54	335.05	43.92	357.51	229.34	212.12	276.18	1365.35	1843.81	931.36	250.63	8.87	33.53	17.44	10.33	0.86	29
		DQ516752	ERCC-00004	523			291.01	259.53	477.72	5356.57	17916.7	9484.84	7202.46	528.11	1303.91	432.86		16.59	427.96	3806.52	3694.84	570.25	1038.12	565.99	495.5	789.26	274.45	492.45	337.38	154.56	2493.67	920.11	3679.05	592.03	244.13	1487.8	857.01	930.18	578.22	3206.25	3762.52	2947.81	118.18	262.74	305.91	256.95	146.35	171.06	243.82
		DQ668364	ERCC-00009	984			9.1	10.73	13.87	743.66	2270.4	897.08	1000.94	41	88.57	23.69		3.28	42.43	125.56	115.43	70.05	266.66	63.88	32.47	40.41	3.74	34.28	67.48	12.16	103.25	80.39	280.45	45.49	47.13	109.63	96.33	77.51	94.79	254.71	167.76	73.65	61.67	16.15	24.94	13	21.81	7.27	50.19
		DQ883670	ERCC-00012	994			0	0	0	0	0	0	0	0	0	0		0	0	0	0	0	0	0	0	0	0	0	0	0	0	0	0	0	0	0	0	0	0	0	0	0	0	0	0	0	0	0	0
		EF011062	ERCC-00013	808			0	0	0	0	0	1.12	0	0	0	0		0	0	0	0	0	0	0	0	0	0	0	0	0	0	0	0	0	0	0	0	0	0	0	0	0	0	0	0	0	0	0	0
		DQ875385	ERCC-00014	1957			0	0	0.06	1.95	0	0	0	0	0.27	0		0	0	0	0	5.33	0	0	0	0	0	0	0	0	1.92	0	0	0	0	1.1	2.41	0	0	0	0	0	0	0	0	0	0	0	0
		DQ883664	ERCC-00016	844			0.98	0	0	0	0	0	0	0	0	0		0	0	0	0	0	0	0	0	0	0	0	0	0	0	0	0	0	0	0	0	0	0	1.58	0	0	0	0	0.51	0	0	0	0
		DQ459420	ERCC-00017	1136			0	0	0	0	0	0	0	0	0	0		0	0	0	0	0	0	0	0	0	0	0	0	0	0	0	0	0	0	0	0	0	0	0	0	0	0	0	0	0	0	0	0
		DQ883651	ERCC-00019	644			0	0.63	0.46	82.17	0	0	8.08	8.66	10.32	9.39		0	0	362.13	7.63	15.19	8.41	0	2.17	0	0	0	0	1.07	0	0	0	3.47	5.3	13.8	4.96	30.13	0.59	67.56	0	6.36	0	0	0	12.02	0	0	0.17
		DQ855004	ERCC-00022	751			9.42	7.38	5.24	255.33	161.45	431.44	353.97	22.25	35.99	17.73		0.91	20.41	204.6	0	7.49	48.07	3.03	0.55	1.41	0.43	51.51	65.83	3.97	60.84	0	70.64	38.18	10.3	26.97	37.93	114.29	38.77	35.54	128.65	66.86	1.1	9.36	0.61	1.67	1.3	19.9	3.3
		DQ854993	ERCC-00024	536			0	0	0	0	0	0	0	0	0	0		0	0	0	0	0	0	0	0	0	0	0	0	0	0	0	0	0	0	0	0	0	0	0	0	0	0	0	0	0	0	0	0
		DQ883689	ERCC-00025	1994			6.4	4.83	19.65	65.47	166.97	359.33	57.44	19.01	38.37	13.98		0.19	33.81	385.18	356.51	33.01	67.08	11.88	0.9	5.49	2.05	5.47	7.75	0.99	21.37	10.67	131.34	3.29	6.83	48.95	69.45	78.21	12.58	26.32	0.6	67.67	17.16	0	0	0	0	0	3.46
		DQ459419	ERCC-00028	1130			0	0	1.37	0	0	6.16	0	0	0.1	0		0	0	90.48	0	4.85	0.12	0	0	0	0	0	0	0	0	0	0	0	4.61	0	0.11	0.8	0	0	0	2.62	0	0	0	0	0	0	0
		DQ459431	ERCC-00031	1138			0	0	0	0	0	0	0.32	0.42	0	0		0	0	0	0	0	0	0	0	0	0	0.37	0	0	0	0	0	0	0	0	0	0	0	0	0	0	0	0	0	0	0	0	0
		DQ516796	ERCC-00033	2022			0	0.16	0	0	0.39	0	0	0	0.05	0		0	0	1.85	1.34	0	0	0	0	0	0	0	0	0	0	0	0	0	0	0	0	0.05	0.1	0.23	0	0.16	0	0	0	0	0	0	0
		DQ855001	ERCC-00034	1019			3.13	2.72	0	22.48	1.67	0	7	4.44	0	0.93		0	0	0	0.24	1.87	32.82	0	0	0	14.35	0.29	0	0.07	0	0	1554.21	5.77	0.68	125.84	7.36	1.02	4.27	46.7	0	0	0	0	0	0	0	0	0
		DQ459413	ERCC-00035	1130			5.35	8.59	33.9	59.83	148.24	206.72	146.85	4.78	11.83	2.12		0.06	0	139.48	41.94	46.83	11.66	11.87	5.33	0	24.94	8.8	31.09	0.06	14.88	0.13	26.71	42.08	14.8	57.73	37.38	30.72	20.22	3.1	0	10.35	4.73	0	0	0	4.7	0	0
		DQ883656	ERCC-00039	740			0	0	0	0	0	0	6.59	0	0	0		0	0	0	0	0	0	0	0	0	0	0	0	0	0	0	0	0	0	0	0	0	0	0	0	0	0	0	15.01	0	0	0	0
		DQ883661	ERCC-00040	744			0	0	0	0	0	0	0	0	0	0		0	0	0	0	0	0	0	0	0	0	0	0	0	0	0	0	0	0	0	0	0	0	0	0	0	0	0	0	0	0	0	0
		EF011069	ERCC-00041	1122			0	0	0	0	0	0	0	0	0	0		0	0	0	0	0	0	0	0	0	0	0	0	0	0	0	0	0	0	0	0	0	0	0	0	0	0	0	0	0	0	0	0
		DQ516783	ERCC-00042	1023			39.45	22.12	68.02	802.48	2216.01	1829.42	1110.69	65.77	205.36	64.96		3.87	50.35	1258.12	544.74	118.14	347.08	39.78	52.09	18.68	53.57	226.65	257.65	19.2	496.66	279.45	330.19	186.32	65.24	675	317.62	336.21	299.99	558.28	1056.94	374.62	199.78	11.26	60.36	26.52	15.3	9.06	9.76
		DQ516787	ERCC-00043	1023			4.68	6.01	8.62	39.37	547.02	324.5	143.48	7.1	34.55	6.33		0.54	36.88	312.16	117.68	19.73	17.46	19.46	8.56	5.16	37.65	71.99	46.69	2.85	134.24	49.5	35.26	17.96	8.31	38.88	28.73	29.99	25.83	398.33	41.97	193.56	3.29	9.9	14.99	7.63	7.85	0	15.07
		DQ459424	ERCC-00044	1156			0.39	1.12	1.45	17.37	9.74	18.45	84.03	1.37	3.34	0.8		0	0	23.32	0	26.22	62.38	12.86	4.54	0	0.13	5.14	0.39	0	1.76	1.25	0	0.57	6.52	8.33	6.83	10.24	5.4	0	11.81	5.1	0	0	0	0	0	0	0.08
		DQ516748	ERCC-00046	522			62.78	67.56	63.48	2162.49	18436.5	5642.1	3967.43	137.72	343.9	157.8		8.83	52.26	2135.93	899.33	224.85	312.66	116.89	251.31	125	161.88	355.57	347.65	208.03	1851.11	1067.56	2397.8	657.14	49.04	554.91	164.7	343.24	473.64	4881.08	1369.46	5020.6	163.76	303.5	275.21	189.84	168.09	152.33	129.59
		DQ883671	ERCC-00048	992			0	0	0	0	0	0	0	0	0	0		0	0	0	0	0	0	0	0	0	0	0	0	0	0	0	0	0	0	0	0	0	0	0	0	0	0	0	0	0	0	0	0
		DQ516740	ERCC-00051	274			0	0	0	0	0	27.35	0	0	0	0		0	0	0	0	0	0	0	0	0	0	0	11.47	0	0	0	0	0	0	0	0	0	0	32.32	0	0	0	3.86	0	9.29	0	0	0
		DQ516785	ERCC-00053	1023			0.22	0.94	1.67	16.31	10.75	12.61	2.72	1.1	3.96	0		0.2	0	40.53	21.37	3.01	3.31	0.75	0.1	0.14	1.49	0.85	1.49	3.38	10.85	22.76	0	1.1	0.14	5.19	1.71	13.59	3.19	7	5.02	2.49	2.02	0	3.55	0	0	0	0
		DQ516731	ERCC-00054	274			0	0	0	0	7.11	0	0	0	0	0		0	0	0	61.53	2	0	0	0	0	0	0	0	0	0	0	0	0	0	0	0.85	0.78	12.83	163.84	0	0	0	0	0	0	0	0	0
		DQ668366	ERCC-00057	1021			0	0	0	0	0	0	0	0	0	0		0	0	0	0	0	0	0	0	0	0	0	0	0	0	0	0	0	0	0	0	0	0	0	0	0	0	0	0	0	0	0	0
		DQ459418	ERCC-00058	1136			0	0	0	0.57	0	0	0	0	0	0		0	0	0	0	0	0	0	0	0	0	0	0	0	0	0	0	0	0	0	0	0	0	0	0	0	0	0	0	0	0	0	0
		DQ668356	ERCC-00059	525			0	2.21	3.91	0	96.14	0	123.2	1.84	0	0		1.37	0	0	0	0	0	0	0	0	0	0	0	0	0	0	0	0	0	9.84	0.28	0	0	0	0	36.24	0	0	0	0	0	0	0
		DQ516763	ERCC-00060	523			18.73	13.45	22.98	493.63	3989.96	2159.48	1378.33	33.69	103.48	38.07		1.9	106.9	1137.72	245.77	27.47	329.54	39.41	22.43	12.97	141.56	371.61	338.02	33.45	1072.93	460.58	732.74	208.77	17.9	294.61	65.29	159.22	273.28	2391.56	647.89	1583.65	51.15	21.23	1.13	1.01	11.16	4.82	5.06
		DQ459426	ERCC-00061	1136			0	0	0	0	0	0	0	0	0	0		0	0	0	0	0	0	0	0	0	0	0	0	0	0	0	0	0	0	0	3.67	0	0	0	0	0	0	0	0	0	0	0	0
		DQ516786	ERCC-00062	1023			1.89	2.83	6.3	51.79	260.3	33.06	17.67	6.52	6.83	14.69		0.2	9.81	23.22	62.68	14.33	38.75	13.91	3.47	4.75	154.77	9.23	4.94	1.12	16.03	36.89	55.68	4.86	1.5	39.8	4.64	10.22	5.74	62.35	47.92	30.08	5.56	0	5.92	2.54	0	0	0.28
		DQ883653	ERCC-00067	644			0	0	0	46.85	35.36	0	0	0	0	0		0	0	0	0	0	0	0	0	0	0	0	0	0	0	0	0	0	0	0	0	0	0	0	0	0	0	0	0	0	0	0	0
		DQ459421	ERCC-00069	1137			0	0	0	0.09	0	0	0	0	0	0		0	0	2.2	0	0	0	0	0	0	0	0	0	0	0	0	0	0	0	0	0	0	0	0	0	0.83	0	0	0	0	0	0	0
		DQ883654	ERCC-00071	642			8.96	3.57	40.5	179.57	400.12	58.34	107.72	8.69	7.23	4.48		0	0	129.18	77.5	22.63	13.22	0	0.34	0.74	0	2.38	6.8	0	13.46	21.38	38.62	2.05	5.33	41.57	15.59	0.6	23.49	69.01	0	133.11	0	0	12.55	0	0.84	10.99	0.34
		DQ668358	ERCC-00073	603			0	0	0	0	0	0	0	0	0	0		0	0	0	0	0	0	0	0	0	0	0	0	0	0	0	0	0	0.26	0	0	0	0	0	0	0	0	0	0	0	0	0	0
		DQ516754	ERCC-00074	522			257.22	227.87	476.24	8845.92	39079.4	16984.4	11783.8	712.09	1703.97	559.16		28.05	564.1	11218.7	4691.03	1001.9	1969.69	375.77	534.46	257.51	482.39	1042.19	1064.3	185.28	3523.13	1739.43	4521.4	1472.46	272.89	3316.53	1195.04	2043.63	1339.45	6866.25	6291.61	6368.37	544.6	714.68	1426.06	1101.11	585.2	648.01	369.64
		DQ516778	ERCC-00075	1023			0	0	0	0	0	0	0	0	0	0		0	0	14.12	0	0	0	0	0	0	0	0	0	0	0	0	0	0	0	0	0	0	0	0	0	0	0	0	0	0	0	0	0
		DQ883650	ERCC-00076	642			5.97	0.84	0	207.17	210.53	222.7	174.33	1.68	1.76	13.91		0.38	0	0	0	11.44	6.34	0.26	6.37	0	0	0	2.5	0	0	0	33.93	33.32	0.97	0	19.05	59.71	0.4	48.09	1.11	8.81	0	0	28.24	2.84	0	20.28	0.17
		DQ516742	ERCC-00077	273			0	0	0	0	0	0	0	0	0	0		0.75	0	0	0	0	0	0	0	0	0	0	0	0	0	0	0	0	0	0	0	0	0	26.35	0	32.92	0	0	0	0	0	0	0
		DQ883673	ERCC-00078	993			0	1.71	1.07	7.11	88.65	70.57	41.54	0.33	0.57	7.81		0	0	18.67	0.99	1.48	0.27	0	0	0	0	0	0	0	6.52	0.45	0	0.69	0.85	0	4.8	4.3	2.87	0	0	0	0	0	0	0	0	0	0.1
		DQ883652	ERCC-00079	644			0.2	0.21	0	124.66	1055.49	75.13	255.96	28.78	0	0.23		0.25	0.26	45.09	0	0	128.54	0	0	0	0	0	0.28	0.13	4.66	0.27	0	0	0	1.4	0	9.91	49.21	0.76	87.74	16.47	0	0	10.14	0	0	0	0
		DQ854991	ERCC-00081	534			0	0	0	0	0	0	0	0	0	0		0	0	0	0	0	0	0	0	0	0	0	0	0	0	0	0	0	0	0	0	0	0	0	0	0	0	0	0	0	0	0	0
		DQ516780	ERCC-00083	1022			0	0	0	0	0	0	0	0	0	0		0	0	0	0	0	0	0	0	0	0	0	0	0	0	0	0	0	0	0	0	0	0	0	0	0	0	0	0	0	0	0	0
		DQ883682	ERCC-00084	994			0	0.24	0.13	0.33	11.93	21.16	43.89	2.28	2.16	0.41		0	0	0	0	0	13.54	0	0.88	0	0	0	0	0.45	0	0	0	6.63	1.41	0.41	3.66	0	2.2	21.67	0	0	0	0	0	0	0	0	0
		DQ883669	ERCC-00085	844			0	3.12	0	0	0	0	112.1	0.2	0	0		0	0	0	0	0	0	0	0	0	0	0	0	0	0	0	0	0	1.37	0	0	0	0	0	0	0.15	0	0	0	0	0	0	0
		DQ516791	ERCC-00086	1020			0	0	0	0	0	0	0	0	0	0		0	0	0	0	0	0	0	0	0	0	0	0	0	0	0	0	0	0	0	0	0	0	0	0	0	0	0	0	0	0	0	0
		DQ459425	ERCC-00092	1124			8.48	5.91	0.81	92.87	265.22	392.22	156.48	40.13	98.5	17.18		0.06	0	6.69	0.43	3.04	26.33	0	0.17	0	1.87	4.68	7.72	0	0.42	0	0	6.59	45.68	129.56	7.11	63.33	1.14	25.89	0.19	10.2	1.59	0	0	24.76	9.47	0	11.65
		DQ516759	ERCC-00095	521			13.53	13.97	55.32	683.91	2891.51	1701.63	1546.65	95.21	119.86	49.46		2.43	230.89	206.25	92.53	39.44	267.39	133.4	67.1	25.76	12.15	86.84	147.91	13.26	520.45	163.43	409.08	27.2	52.7	381.48	178.08	299.72	151.38	865.55	837.65	249.12	434.46	14.9	18.26	20.38	3.75	6.07	239.11
		DQ459429	ERCC-00096	1107			309.39	268.27	495.23	13760.8	43234.4	28016.1	20173	839.26	1542.68	552.53		51.81	103.61	6995.06	3490.31	1386.1	1971.34	455.7	459.48	186.69	329.96	1286.98	794.68	116.78	2136.66	1014.73	2284.08	1379.63	639.57	4120.4	2632.77	2504.84	1966.86	2789.74	2576.41	3147.54	137.85	243.7	680.81	373.18	440.42	175.7	428.49
		DQ516758	ERCC-00097	523			0	0	0	0	0	0	0	0	0	0		0	0	0	0	0	0	0	0	0	0	0.36	0	0	0	0	0	0	0	0	0	0	0	0	0	0	0	0	0	0	0	0	0
		DQ459415	ERCC-00098	1143			0	0	0	0	0	0	0	0	0	0		0	0	0	0	0	0	0	0	0	0	0	0	0	0	0	0	0	0	0	0	0	0	0	0	0	0	0	0	0	0	0	0
		DQ875387	ERCC-00099	1350			0.89	0	0.56	67.25	33.81	120.6	17.43	1.72	0	2.02		0.05	0	0.65	1.4	8.65	0.1	0.44	0	0	0	6	0	0	1.91	0.1	2.4	0	3.37	1.65	5.86	0.25	0	0	0.3	17.22	0	0	0	0	4.31	0	0
		DQ516815	ERCC-00104	2022			0	0	0.12	0	0	0	0	0	0	0		0	0	0	0	0	0	0	0	0	0	0	0	0	0	3.49	0	0	0	0	0	0	0	0	0	0	0	0	0	0	0	0	0
		DQ668365	ERCC-00108	1022			21.16	24.48	29.1	702.96	2480.23	1668.47	1111.17	29.5	35.26	17.5		1.63	2.93	430.57	460.18	73.13	80.5	15.57	31.88	20.23	0	3.41	8.11	1.15	64.33	13.55	71.06	96.1	80.78	146.27	117.72	90.29	54.33	159.39	114.18	301.65	8.61	19.82	62.41	56.38	21.52	12.96	0.95
		DQ854998	ERCC-00109	536			0	0	0	0	0	0	0	0	0	0		0	0	0	0	0	0	0	0	0	0	0	0	0	0	0	0	0	0	0	0	0	0	0	0	0	0	0	0	0	0	0	0
		DQ883685	ERCC-00111	994			66.87	52.53	100.6	886.97	2793.33	1957.76	1112.74	131.98	226.63	94.7		6.96	51.24	1525.91	620.53	260.91	365.53	203.48	137.16	61.27	144.98	239.93	288.48	37.43	529.9	445.89	997.8	187.88	130.6	857.45	369.12	464.28	362.59	481.85	583.65	489.71	535.25	12.75	20.5	9.81	18.49	0	63.02
		DQ459422	ERCC-00112	1136			4.24	1.04	1.25	26.26	95.43	226.83	244.75	3.63	14.09	3.39		0.42	0	27.4	37	0.38	11.12	32.08	0.42	29.51	54.99	44.1	44.39	0.06	22.81	1.15	56.6	22.07	0.84	19.69	18.15	28.85	17.6	5.62	50.61	35.52	0.22	0	0	0	6.46	1.51	0.25
		DQ883663	ERCC-00113	840			102.98	122.74	146.46	5973.07	19746.8	9670.04	8334.11	256.31	542.47	155.08		15.96	169.92	1164.96	562.87	508.49	892.48	239.03	213.13	117.33	419.02	335.49	349.87	43.66	817.7	381.36	1060.25	337.63	260.31	1800.55	1035.73	821.4	583.25	890.36	747.94	773.06	32.91	99.41	86.03	117.24	83.18	32.16	220.33
		DQ668367	ERCC-00116	1991			4.1	1.67	7.44	61.55	173.68	109.53	38.12	6.42	20.85	8.23		0.42	0.63	30.57	11.17	8.29	18.97	4.55	0.54	0.2	0	6.49	1.41	2.42	7.37	0.13	5.23	0.81	6	89.37	99.14	31.98	12.72	6.49	2.29	8.77	32.46	0	10.46	0	0	0	0.09
		DQ459412	ERCC-00117	1136			0	0	0	0	0	0	0	0	0	0		0	0	0	0	0	0	0	0	0	0	0	0	0	0	0	0	0	0	0	0	0	0	0	0	0	0	0	0	0	0	0	0
		DQ854992	ERCC-00120	536			0	0	0	0	0	0	0	0	0	0		0	0	0	0	0	0	0	0	0	0	0	0	0	0	0	0	0	0	0	0	0	0	0	0	0	0	0	0	0	0	0	0
		DQ516782	ERCC-00123	1022			0	0	0	6.19	0	0	0	0	0.99	0		0	0	0	0	0	0	0	0	0	0	0.14	0	0	0	0	0	0	0	0	0	0	30.87	0	0	0	0	0	0	0	0	0	0
		DQ459427	ERCC-00126	1118			0	0	0	4.9	0	0.08	48.25	0	0	0		0	0	70.23	0	0	0	0	3.35	0	0	0	0.13	0	0	0	0	0	0	2.52	2.97	0.51	0	0	0	8.17	0	0	0	0	0	0	0
		EF011072	ERCC-00130	1059			1068.84	932.81	1668.98	35449.9	125313	73050.8	59751.3	2125.51	4692.55	1601.38		103.77	1355.58	16131.9	12465.5	4670.25	7733.41	1830.89	2068.63	1194.5	2362.61	2240.01	1837.96	652.02	7206.44	3355.99	16609.6	2422.05	1870.74	13593.3	8167.16	7273.55	4111.44	10321.6	13333.6	8170.27	2255.31	358.35	452.14	470.49	354.58	173.67	1223.36
		DQ855003	ERCC-00131	771			14.14	17.92	0.18	160.84	119.35	322.9	546.93	4.22	13.47	9.32		0.59	0	0	112.37	32.02	0.37	1.47	1.6	1.17	7.09	17.21	0.43	0.52	2.72	0	3.09	23.05	1.34	23.88	29.67	37.32	20.52	0.15	1.47	23.55	0	0	0	0	1.25	0	0
		DQ516739	ERCC-00134	274			0	0	0	0	0	0	0	0	0	0		0	0	0	0	0	0	0	0	0	0	0	0	0	0	0	0	0	0	0	0	0	0	0	0	1.3	0	0	0	0	0	0	0
		EF011063	ERCC-00136	1033			56.5	54.68	120.02	1310.04	4486.23	3662.41	2644.3	118.79	276.57	82.54		3.12	124.01	323.92	535.42	212.8	476.14	364.36	101.32	35.84	30.31	77.09	82.21	39.53	178.05	238.76	984.11	85.58	102.04	581.84	400.8	612.92	227.42	208.01	778.31	349.58	96.52	33.36	53.35	22.24	21.21	29.83	105.24
		DQ855000	ERCC-00137	537			0	0	0	0	0	0	0	0	0	0		0	0	0	0	0	0	0	0	0	0	0	0	0	0	0	0	0	0	0	0	0	0	0	0	0	0	0	0	0	0	0	0
		DQ516777	ERCC-00138	1024			0	0	0	0	0	0	0	0	0	0		0	0	0	0	0	0	0	0	0	0	0	0	0	0	0	0	0.11	0	0	0	0	0	0	0	0	0	0	0	0	0	0	0
		DQ883646	ERCC-00142	493			0	0	0	0	0	0	0	0	0	0		0	0	0	0	0	0	0	0	0	0	0	0	0	0	0	0	0	0	0	0	0	0	0	0	0	0	0	0	0	0	0	0
		DQ668362	ERCC-00143	784			0	0	0	0	0	0.13	0	0	6.97	0		0	0	0	0	0	0	0	0	0	0	0	0	0	0	0	0	0	0	0	0	0	0	0	0	0	0	0	0	0	0	0	0
		DQ854995	ERCC-00144	538			0.25	3.47	4.07	1.69	342.88	0	94.1	0	1.24	0		0	0	0	0	0	0	0.67	0	0	0	0	0	0	0	0	0	0	0	0	0	0	43.48	0	1.41	12.38	0	0	0	0	0	0	0
		DQ875386	ERCC-00145	1042			17.65	25.13	18.12	750.53	2199.29	1239.7	1032.01	94.12	152.61	71.22		3.6	49.13	423.58	640.26	52.79	164.5	84.4	55.62	15.28	33.65	94.86	96.02	13.27	315.08	66.53	322.23	97.75	38.39	424.13	261.64	213.93	225.31	360.88	166.2	303.86	0.5	0	15.78	19.5	20.56	0.84	30.71
		DQ516790	ERCC-00147	1023			0	0	0	0	0	0	0	3.47	0.11	0		0	0	0	0	0	0	0	0	0	0	0	0	0	0	0	0	0.22	0	0	0	0	3.72	31.54	0	0.83	0	0	0	0	0	0	0
		DQ883642	ERCC-00148	494			0	0	0.33	0.27	1.31	0	83.55	0	0	0		0	0	0	0	17.45	0	0	0	0	0	0	0	0.2	0	0	0	0	0	0	0	0.28	0	0	0	0	0	0	21.57	0	0	0	0
		DQ883659	ERCC-00150	743			0	0	0	0	7.64	0	8.33	0	2.43	0		0.1	0	0	0	0	0	0	0	0	0	0	0	0	0	0	0	0	0	0	8.8	0	0	0.31	0	0	0	0	0	0	0	0	0
		DQ854997	ERCC-00154	537			0	3.48	0	13.29	0	0	52.41	0	0	1.2		0	0	0	0	0	1.19	0	0	0	0	0	0	0	0	0	0	0	0	0	0	0	0	0	0	0	0	0	0	0	0	0	0
		DQ883643	ERCC-00156	494			0	0	0	0	0	0	0	0	0	0		0	0	0	0	0	0	0	0	0	0	0	0	0	0	0	0	0	0	0	0	0	0	0	0	0	0	0	0	0	0	0	0
		DQ839618	ERCC-00157	1019			0	0.12	0.9	2.89	1.46	0.09	0	0.95	0	0		0.07	0	17.67	0	0	0	0	0	0	0	0	0	0	0	0	0	10.54	0	65.53	0	0.45	0.75	0	0	0	0	0	0	0	0	0	0
		DQ516795	ERCC-00158	1027			0	0	0.13	0	0	0	0	0.47	0	0		0	0	0	0	0	0	0	0	0	0	0	0	0	0	0	1.75	0	0	0	0	0	0	0	0	0	0	0	0	0	0	0	0
		DQ883658	ERCC-00160	743			0.49	0	0.57	56.89	113.96	64.64	12.58	0	0	0		0	0	23.79	0	0	0	0	0	0	0	0	0	0	0.71	0	0	1.5	0	0	0.18	0	0.97	0.16	0	5.38	0	0	0	0	0	0	0
		DQ516750	ERCC-00162	523			0	0	0.3	39.37	85.02	3.72	16.36	0.37	0	0		0	0	71.22	1.12	0	6.19	0.69	0.44	0.65	1.04	2.53	0.38	0.18	15.59	0.37	0	7.3	0	3.7	0.57	3.41	0	6.1	0	18.99	6.47	15.73	0	24.28	0	0	0
		DQ668359	ERCC-00163	543			2.5	0	0	11	0	43.6	63.72	1.05	0	0		0	0	28.9	0	2.23	0	0	0	0	0	0	0	0	0	0	0	0	0	0	5.96	4.47	0	12.01	0	3.97	0	0	0	0	0	0	0.21
		DQ516779	ERCC-00164	1022			0	0	1.66	0	11.44	0	0	1.11	0	0.66		0	0	0	0	0	0	0	0	0	0	0	7.18	0	0	0	32.21	0	0	0	0	0	2.45	0.31	0	0	0	0	0	0	0	0	0
		DQ668363	ERCC-00165	872			1.62	2.28	5.76	195.84	90.64	73.04	42.31	4.58	13.84	0.16		0	1.24	71.35	18.67	5.02	0.16	1.62	0.11	42.27	0	5.91	0.18	13.82	10.01	6.41	0.53	2.43	11.81	182.29	2.83	30.04	9.11	6.69	2.78	59.77	0	0	14.74	0	0	0	0.11
		DQ516776	ERCC-00168	1024			0	0	0	0	0	0	0	0	0	0		0	0	0	0	0	0	0	0	0	0	0	0	0	0	0	0	0	0.27	0	0	0	0	0	1.05	1.42	0	0	0	0	0	0	0
		DQ516773	ERCC-00170	1023			0	0.12	0.13	27.17	95.39	17.94	44.23	0.32	6.93	0.79		0	0	0.46	0.24	0.29	0.26	0.15	0.8	0	12.95	47.14	1.2	0.14	5.35	2.76	4.64	0.44	0.14	1.06	0.85	1.46	10.31	2.27	23.65	6.28	0	0	1.58	0	0	0	0
		DQ854994	ERCC-00171	505			148.47	89.65	205.07	6358.3	17272.7	9720.67	9054.94	350.6	410.34	173.15		22.66	232.96	2760.22	484.7	552.22	1039.91	227.53	167.72	43.25	68.5	441.16	566.29	52.42	1840.33	701.78	1086.42	459.88	201.88	1146.06	977.71	888.77	739.28	2517.95	458.32	2484.83	16.69	122.18	217.29	176.12	124.05	96.63	188.63
7SLRNA:CR32864	Signal recognition particle 7SL RNA CR32864	FBtr0081624	FBgn0000003	299	GO:0005786,GO:0006614		8.46	13.41	41.1	32.27	5.67	17.99	12.38	25.61	8.4	34.44		6.43	7.96	30.02	0.7	26.74	6.93	15.89	93.23	0	0	12.24	0	5.34	0.65	1.8	10.76	68.19	34.44	0	0	22.75	0	21.23	51.49	0	71.36	35.59	128.54	89.84	142.64	229.96	1.08
a	arc	FBtr0071763	FBgn0000008	4847	GO:0016324,GO:0003674,GO:0048749,GO:0005912,GO:0070830		38.49	55.17	102.83	61.06	20.05	2.11	8.29	20.46	39.66	11.92		3.53	1.78	0.28	0	0	0	0	1.38	0.04	0	3.51	0	1	0	0	3.86	0.5	0	0	0	0	0	3.12	0	9.34	0	0	0	0	0	0	0
a	arc	FBtr0071764	FBgn0000008	5173	GO:0016324,GO:0003674,GO:0048749,GO:0005912,GO:0070830		69.24	124.83	142.27	19.21	5.02	50.61	44.26	84.09	70.85	103.27		6.29	4.74	1.51	7.44	2.2	0	0	0.16	2.93	6.08	7.54	0	1.41	2.73	0	0	1.29	0	0	1.04	0.06	2.2	15.54	0.04	14.22	0	0	0	0	0	0	0
a	arc	FBtr0100521	FBgn0000008	4665	GO:0016324,GO:0003674,GO:0048749,GO:0005912,GO:0070830		172.77	159.26	58.26	0	0	0	0	68.99	11.85	34.2		1.71	0	0	0	10.7	0.36	0	1.14	0.08	0	0	8.27	0	0	0	0	0	0	0	9.32	0	0	0	0	0	0.63	0	0	0	0	0	0.83
a	arc	FBtr0342981	FBgn0000008	3897	GO:0016324,GO:0003674,GO:0048749,GO:0005912,GO:0070830		0.19	0.66	0	0	6.51	0	0	0	0	0		0	0	0	0	0	0	0	0	0	0	0	0	0	0	0.1	0	0	0.06	0	0	0	0	0	0	0	0.07	0	0	0	0	0	0
abd-A	abdominal A	FBtr0083387	FBgn0000014	4458	GO:0035053,GO:0007400,GO:0003705,GO:0008354,GO:0007507,GO:0006915,GO:0045944,GO:0010002,GO:0007422,GO:0007399,GO:0048636,GO:0043565,GO:0014019,GO:0007501,GO:0035225,GO:0048738,GO:0007494,GO:0008406,GO:0035224,GO:0003700,GO:0048806,GO:0007280,GO:0042694,GO:0009952,GO:0006355,GO:0007438,GO:0005667,GO:0005634,GO:0007506		0	0	0	0	0	0	0	0	0	0		0	0	0	0	0	0	0	0	0	0	0	0	0.02	0	0	0	0.37	0	0	0	0	0	0	0	0	0	0	0	0	0	0	0
abd-A	abdominal A	FBtr0083388	FBgn0000014	3935	GO:0035053,GO:0007400,GO:0003705,GO:0008354,GO:0007507,GO:0006915,GO:0045944,GO:0010002,GO:0007422,GO:0007399,GO:0048636,GO:0043565,GO:0014019,GO:0007501,GO:0035225,GO:0048738,GO:0007494,GO:0008406,GO:0035224,GO:0003700,GO:0048806,GO:0007280,GO:0042694,GO:0009952,GO:0006355,GO:0007438,GO:0005667,GO:0005634,GO:0007506		0	0.03	0	0	0	0	0	0	0	0		0.01	0	0	0	0	0	0	0	0	0	0	0	0	0	0	0	0	0	0	0	0.03	0	0	0	0.03	0	0	0	0	0	0	0
abd-A	abdominal A	FBtr0300485	FBgn0000014	4559	GO:0035053,GO:0007400,GO:0003705,GO:0008354,GO:0007507,GO:0006915,GO:0045944,GO:0010002,GO:0007422,GO:0007399,GO:0048636,GO:0043565,GO:0014019,GO:0007501,GO:0035225,GO:0048738,GO:0007494,GO:0008406,GO:0035224,GO:0003700,GO:0048806,GO:0007280,GO:0042694,GO:0009952,GO:0006355,GO:0007438,GO:0005667,GO:0005634,GO:0007506		0	0	0	0	0	0	0	0	0	0		0	0	0	0	0	0	0	0	0	0	0	0	0	0	0.04	0	0	0	0	0	0	0	0	0	0	0	0	0	0	0	0	0
abd-A	abdominal A	FBtr0306337	FBgn0000014	5269	GO:0035053,GO:0007400,GO:0003705,GO:0008354,GO:0007507,GO:0006915,GO:0045944,GO:0010002,GO:0007422,GO:0007399,GO:0048636,GO:0043565,GO:0014019,GO:0007501,GO:0035225,GO:0048738,GO:0007494,GO:0008406,GO:0035224,GO:0003700,GO:0048806,GO:0007280,GO:0042694,GO:0009952,GO:0006355,GO:0007438,GO:0005667,GO:0005634,GO:0007506		0	0	0	0	0	0	0	0	0	0		0	0	0	0	0	0	0	0	0	0	0	0	0.17	0	0.49	0	0	0	0	0	0	0	1.21	0	0	0	0	0	0	0	0	0
Abd-B	Abdominal B	FBtr0083381	FBgn0000015	3251	GO:0008354,GO:0008584,GO:0007507,GO:0045843,GO:0007621,GO:0045944,GO:0007486,GO:1902339,GO:0030539,GO:0035263,GO:0045705,GO:0030540,GO:0035225,GO:0061101,GO:0007494,GO:0035224,GO:0007431,GO:0048066,GO:0003700,GO:0009997,GO:0035277,GO:0035261,GO:0007548,GO:0048087,GO:0048071,GO:0007280,GO:0000980,GO:0007385,GO:0048094,GO:0007484,GO:0000976,GO:0046693,GO:0005634,GO:0035215,GO:0007424,GO:0007379,GO:…		0	0	0	0	0	0	0	0	0	0		0	0	0	0	0	0	0	0	0	0	0	0	0	0	0	0	0	0	0	0	0	0	0	0	0	0	0	0	0	0	0	0
Abd-B	Abdominal B	FBtr0083382	FBgn0000015	3078	GO:0008354,GO:0008584,GO:0007507,GO:0045843,GO:0007621,GO:0045944,GO:0007486,GO:1902339,GO:0030539,GO:0035263,GO:0045705,GO:0030540,GO:0035225,GO:0061101,GO:0007494,GO:0035224,GO:0007431,GO:0048066,GO:0003700,GO:0009997,GO:0035277,GO:0035261,GO:0007548,GO:0048087,GO:0048071,GO:0007280,GO:0000980,GO:0007385,GO:0048094,GO:0007484,GO:0000976,GO:0046693,GO:0005634,GO:0035215,GO:0007424,GO:0007379,GO:…		0	0	0	0	0	0	3.68	0	0	0		0	0	0	7.52	0	0	0	0	0	0	0.27	0	0	0	0	0	0	0	0	0	0	4.9	0	0	0	0	0	0	0	0	0	0
Abd-B	Abdominal B	FBtr0083383	FBgn0000015	3260	GO:0008354,GO:0008584,GO:0007507,GO:0045843,GO:0007621,GO:0045944,GO:0007486,GO:1902339,GO:0030539,GO:0035263,GO:0045705,GO:0030540,GO:0035225,GO:0061101,GO:0007494,GO:0035224,GO:0007431,GO:0048066,GO:0003700,GO:0009997,GO:0035277,GO:0035261,GO:0007548,GO:0048087,GO:0048071,GO:0007280,GO:0000980,GO:0007385,GO:0048094,GO:0007484,GO:0000976,GO:0046693,GO:0005634,GO:0035215,GO:0007424,GO:0007379,GO:…		0	0	0	0	0	0	0	0	0	0		0	0	0	0	0	0	0	0	0	0	0	0	0	0	0	0	0	0	0	0	0	0	0	0	0	0	0	0	0	0	0	0
Abd-B	Abdominal B	FBtr0083384	FBgn0000015	4415	GO:0008354,GO:0008584,GO:0007507,GO:0045843,GO:0007621,GO:0045944,GO:0007486,GO:1902339,GO:0030539,GO:0035263,GO:0045705,GO:0030540,GO:0035225,GO:0061101,GO:0007494,GO:0035224,GO:0007431,GO:0048066,GO:0003700,GO:0009997,GO:0035277,GO:0035261,GO:0007548,GO:0048087,GO:0048071,GO:0007280,GO:0000980,GO:0007385,GO:0048094,GO:0007484,GO:0000976,GO:0046693,GO:0005634,GO:0035215,GO:0007424,GO:0007379,GO:…		0	0.02	0.5	0	0	0	0	0	0	0		0.04	0	0	0	0	0	0	0	0	0	0.26	6.66	0	0	0.03	0	1.18	0	0	0.07	0	0	0	0	1.18	0	0	0	0	0	0	0
Abd-B	Abdominal B	FBtr0083385	FBgn0000015	3701	GO:0008354,GO:0008584,GO:0007507,GO:0045843,GO:0007621,GO:0045944,GO:0007486,GO:1902339,GO:0030539,GO:0035263,GO:0045705,GO:0030540,GO:0035225,GO:0061101,GO:0007494,GO:0035224,GO:0007431,GO:0048066,GO:0003700,GO:0009997,GO:0035277,GO:0035261,GO:0007548,GO:0048087,GO:0048071,GO:0007280,GO:0000980,GO:0007385,GO:0048094,GO:0007484,GO:0000976,GO:0046693,GO:0005634,GO:0035215,GO:0007424,GO:0007379,GO:…		0	0	0	0	0	0	0	0	0	0		0	0	0	0	0	0	0	0.07	0	0	0	0	0	0	0	0	0	0	0	0	0	0	3.43	0	0	0	0	0	0	0	0	0
Abd-B	Abdominal B	FBtr0330709	FBgn0000015	3260	GO:0008354,GO:0008584,GO:0007507,GO:0045843,GO:0007621,GO:0045944,GO:0007486,GO:1902339,GO:0030539,GO:0035263,GO:0045705,GO:0030540,GO:0035225,GO:0061101,GO:0007494,GO:0035224,GO:0007431,GO:0048066,GO:0003700,GO:0009997,GO:0035277,GO:0035261,GO:0007548,GO:0048087,GO:0048071,GO:0007280,GO:0000980,GO:0007385,GO:0048094,GO:0007484,GO:0000976,GO:0046693,GO:0005634,GO:0035215,GO:0007424,GO:0007379,GO:…		0	0	0	0	0	0	0	0	0	0		0	0	0	0	0	0	0	0	0	0	0	0	0	0	0	0	0	0	0	0	0	0	0	0	0	0	0	0	0	0	0	0
Abd-B	Abdominal B	FBtr0346764	FBgn0000015	3260	GO:0008354,GO:0008584,GO:0007507,GO:0045843,GO:0007621,GO:0045944,GO:0007486,GO:1902339,GO:0030539,GO:0035263,GO:0045705,GO:0030540,GO:0035225,GO:0061101,GO:0007494,GO:0035224,GO:0007431,GO:0048066,GO:0003700,GO:0009997,GO:0035277,GO:0035261,GO:0007548,GO:0048087,GO:0048071,GO:0007280,GO:0000980,GO:0007385,GO:0048094,GO:0007484,GO:0000976,GO:0046693,GO:0005634,GO:0035215,GO:0007424,GO:0007379,GO:…		0	0	0	0	0	0	0	0	0	0		0	0	0	0	0	0	0	0	0	0	0	0	0	0	0	0	0	0	0	0	0	0	0	0	0	0	0	0	0	0	0	0
Abd-B	Abdominal B	FBtr0415463	FBgn0000015	4870	GO:0008354,GO:0008584,GO:0007507,GO:0045843,GO:0007621,GO:0045944,GO:0007486,GO:1902339,GO:0030539,GO:0035263,GO:0045705,GO:0030540,GO:0035225,GO:0061101,GO:0007494,GO:0035224,GO:0007431,GO:0048066,GO:0003700,GO:0009997,GO:0035277,GO:0035261,GO:0007548,GO:0048087,GO:0048071,GO:0007280,GO:0000980,GO:0007385,GO:0048094,GO:0007484,GO:0000976,GO:0046693,GO:0005634,GO:0035215,GO:0007424,GO:0007379,GO:…		0	0	0	0	0	0	0	0	0	0		0	0	0	0	0	0	0	0	0	0	0	0	0.05	0	0	0	0.4	0	0	0	0	0	9.96	0	0	0	0	0	0	0	0	0
Abd-B	Abdominal B	FBtr0415464	FBgn0000015	3715	GO:0008354,GO:0008584,GO:0007507,GO:0045843,GO:0007621,GO:0045944,GO:0007486,GO:1902339,GO:0030539,GO:0035263,GO:0045705,GO:0030540,GO:0035225,GO:0061101,GO:0007494,GO:0035224,GO:0007431,GO:0048066,GO:0003700,GO:0009997,GO:0035277,GO:0035261,GO:0007548,GO:0048087,GO:0048071,GO:0007280,GO:0000980,GO:0007385,GO:0048094,GO:0007484,GO:0000976,GO:0046693,GO:0005634,GO:0035215,GO:0007424,GO:0007379,GO:…		0	0	0	0	0	0	0	0	0	0		0	0	0	0	0	0	0	0	0	0	0	0	0	0	0	0	0	0	0	0	0	0	0	0	0	0	0	0	0	0	0	0
Abd-B	Abdominal B	FBtr0415465	FBgn0000015	8184	GO:0008354,GO:0008584,GO:0007507,GO:0045843,GO:0007621,GO:0045944,GO:0007486,GO:1902339,GO:0030539,GO:0035263,GO:0045705,GO:0030540,GO:0035225,GO:0061101,GO:0007494,GO:0035224,GO:0007431,GO:0048066,GO:0003700,GO:0009997,GO:0035277,GO:0035261,GO:0007548,GO:0048087,GO:0048071,GO:0007280,GO:0000980,GO:0007385,GO:0048094,GO:0007484,GO:0000976,GO:0046693,GO:0005634,GO:0035215,GO:0007424,GO:0007379,GO:…		0	0	0	0	0	0	0	0	0	0		0	0	0	0	0	0	0	0	0	0	0	0	0	0	0	0	0	0	0	0	0	0	0	0	0.32	0	0	0	0	0	0	0
Abl	Abl tyrosine kinase	FBtr0075357	FBgn0000017	6006	GO:0007391,GO:0005737,GO:0008360,GO:0046777,GO:0001764,GO:0038083,GO:0005524,GO:0019897,GO:0007169,GO:0007370,GO:0070938,GO:0005927,GO:0018108,GO:0030424,GO:0004715,GO:0048749,GO:0007417,GO:0048813,GO:0045179,GO:0002009,GO:0005938,GO:0021785,GO:0042127,GO:0005102,GO:0003402,GO:0004713,GO:0007303,GO:0005515,GO:0031234,GO:0005911,GO:0010906,GO:0045087,GO:0016199,GO:0007411,GO:0008045,GO:0006468,GO:…		10.08	11.69	24.95	1.67	0	10.62	5.83	7.14	11.75	16.21		6.15	0	0	0	32.07	52.67	21.29	0.31	0	0	8.21	0	0	0	0	0	0	35.84	17.71	34.17	26.23	14.18	0	0	9.11	0	0	1.67	0	0	0	0
Abl	Abl tyrosine kinase	FBtr0112790	FBgn0000017	12564	GO:0007391,GO:0005737,GO:0008360,GO:0046777,GO:0001764,GO:0038083,GO:0005524,GO:0019897,GO:0007169,GO:0007370,GO:0070938,GO:0005927,GO:0018108,GO:0030424,GO:0004715,GO:0048749,GO:0007417,GO:0048813,GO:0045179,GO:0002009,GO:0005938,GO:0021785,GO:0042127,GO:0005102,GO:0003402,GO:0004713,GO:0007303,GO:0005515,GO:0031234,GO:0005911,GO:0010906,GO:0045087,GO:0016199,GO:0007411,GO:0008045,GO:0006468,GO:…		6.22	5.77	3.31	6.41	0	2.8	4.67	7.52	3.03	4		2.77	0	30.53	0	6.91	5.17	0	0	2.26	0	1.87	0	7.97	37.7	8.88	0	11.81	0	0	1.19	0	2.4	7.17	0	11.49	0	0	0	1.56	0	0	6.79
Abl	Abl tyrosine kinase	FBtr0330130	FBgn0000017	6261	GO:0007391,GO:0005737,GO:0008360,GO:0046777,GO:0001764,GO:0038083,GO:0005524,GO:0019897,GO:0007169,GO:0007370,GO:0070938,GO:0005927,GO:0018108,GO:0030424,GO:0004715,GO:0048749,GO:0007417,GO:0048813,GO:0045179,GO:0002009,GO:0005938,GO:0021785,GO:0042127,GO:0005102,GO:0003402,GO:0004713,GO:0007303,GO:0005515,GO:0031234,GO:0005911,GO:0010906,GO:0045087,GO:0016199,GO:0007411,GO:0008045,GO:0006468,GO:…		1.91	1.12	8.12	0.02	0	0.48	4.96	0.65	1.16	1.24		0.44	0	0	0	6.56	10.54	3.61	0	0	0	3.13	0	0	0	0	40.21	0	0	1.84	6.67	0.38	1.25	0	10.85	1.1	0	0	0	0	0	0	0
Abl	Abl tyrosine kinase	FBtr0330131	FBgn0000017	5967	GO:0007391,GO:0005737,GO:0008360,GO:0046777,GO:0001764,GO:0038083,GO:0005524,GO:0019897,GO:0007169,GO:0007370,GO:0070938,GO:0005927,GO:0018108,GO:0030424,GO:0004715,GO:0048749,GO:0007417,GO:0048813,GO:0045179,GO:0002009,GO:0005938,GO:0021785,GO:0042127,GO:0005102,GO:0003402,GO:0004713,GO:0007303,GO:0005515,GO:0031234,GO:0005911,GO:0010906,GO:0045087,GO:0016199,GO:0007411,GO:0008045,GO:0006468,GO:…		1.59	0.53	0.15	0.17	0	0.01	8.11	1.65	0.25	0.22		0.19	0	0.05	0	0.06	0	0	0	0	0	0	0	4.11	46.93	0	0	11.77	0	0	0	0	0	0.45	0	0.41	0	0	0	0	0	0	1.1
Abl	Abl tyrosine kinase	FBtr0330132	FBgn0000017	5913	GO:0007391,GO:0005737,GO:0008360,GO:0046777,GO:0001764,GO:0038083,GO:0005524,GO:0019897,GO:0007169,GO:0007370,GO:0070938,GO:0005927,GO:0018108,GO:0030424,GO:0004715,GO:0048749,GO:0007417,GO:0048813,GO:0045179,GO:0002009,GO:0005938,GO:0021785,GO:0042127,GO:0005102,GO:0003402,GO:0004713,GO:0007303,GO:0005515,GO:0031234,GO:0005911,GO:0010906,GO:0045087,GO:0016199,GO:0007411,GO:0008045,GO:0006468,GO:…		1.48	0.63	2.31	2.13	26.39	1.08	35.23	0.55	0.2	0.45		0.11	0	0.69	4.11	0.03	0	0	0	0	3.65	1.39	1.09	11.35	0	0	0.25	3.4	0	0	0.02	0	0.04	12.42	0.06	2.83	0	0	0	0	0	0	0
Abl	Abl tyrosine kinase	FBtr0330133	FBgn0000017	6315	GO:0007391,GO:0005737,GO:0008360,GO:0046777,GO:0001764,GO:0038083,GO:0005524,GO:0019897,GO:0007169,GO:0007370,GO:0070938,GO:0005927,GO:0018108,GO:0030424,GO:0004715,GO:0048749,GO:0007417,GO:0048813,GO:0045179,GO:0002009,GO:0005938,GO:0021785,GO:0042127,GO:0005102,GO:0003402,GO:0004713,GO:0007303,GO:0005515,GO:0031234,GO:0005911,GO:0010906,GO:0045087,GO:0016199,GO:0007411,GO:0008045,GO:0006468,GO:…		2.04	0.93	0.62	0	0	0	1.23	1.81	1.39	0.61		0.71	0	0	0	11.12	21.24	0	0	0	0	0.01	0	0	0	0	0	0.01	0	0	0.84	0	0.08	0	0	0.18	0	0	0	0	0	0	0
Abl	Abl tyrosine kinase	FBtr0330134	FBgn0000017	5712	GO:0007391,GO:0005737,GO:0008360,GO:0046777,GO:0001764,GO:0038083,GO:0005524,GO:0019897,GO:0007169,GO:0007370,GO:0070938,GO:0005927,GO:0018108,GO:0030424,GO:0004715,GO:0048749,GO:0007417,GO:0048813,GO:0045179,GO:0002009,GO:0005938,GO:0021785,GO:0042127,GO:0005102,GO:0003402,GO:0004713,GO:0007303,GO:0005515,GO:0031234,GO:0005911,GO:0010906,GO:0045087,GO:0016199,GO:0007411,GO:0008045,GO:0006468,GO:…		9.76	6.95	0.44	6.97	0	0.13	9.79	23.75	3	2.86		3.06	0	0.69	0	0.3	0	0	0	0	0	0.01	0	0	0	0	0	0	0	0	0.01	0	0.02	0.24	0	3.57	0	0	0	3.47	0	0	0
Abl	Abl tyrosine kinase	FBtr0330135	FBgn0000017	5658	GO:0007391,GO:0005737,GO:0008360,GO:0046777,GO:0001764,GO:0038083,GO:0005524,GO:0019897,GO:0007169,GO:0007370,GO:0070938,GO:0005927,GO:0018108,GO:0030424,GO:0004715,GO:0048749,GO:0007417,GO:0048813,GO:0045179,GO:0002009,GO:0005938,GO:0021785,GO:0042127,GO:0005102,GO:0003402,GO:0004713,GO:0007303,GO:0005515,GO:0031234,GO:0005911,GO:0010906,GO:0045087,GO:0016199,GO:0007411,GO:0008045,GO:0006468,GO:…		9.21	8.49	7.88	85.33	53.89	26.05	43.93	7.95	2.52	6.24		1.83	1.14	12	94.18	0.16	0	0	6.67	0	0	3.76	8.96	0	0	0	0	0	2.01	0	0.1	0	0.54	7.72	0	27.52	0	0.2	1.37	0	4.08	1.3	0
Abl	Abl tyrosine kinase	FBtr0330136	FBgn0000017	6060	GO:0007391,GO:0005737,GO:0008360,GO:0046777,GO:0001764,GO:0038083,GO:0005524,GO:0019897,GO:0007169,GO:0007370,GO:0070938,GO:0005927,GO:0018108,GO:0030424,GO:0004715,GO:0048749,GO:0007417,GO:0048813,GO:0045179,GO:0002009,GO:0005938,GO:0021785,GO:0042127,GO:0005102,GO:0003402,GO:0004713,GO:0007303,GO:0005515,GO:0031234,GO:0005911,GO:0010906,GO:0045087,GO:0016199,GO:0007411,GO:0008045,GO:0006468,GO:…		10.62	9.56	1.69	0.16	0	0.08	1.41	19.69	13.6	7.64		9.85	0	0	0	54.17	106.35	0	0	0	0	0.02	0	0	0	0	0	0	0	0	3.88	0	0.75	0	0	1.34	0	0	0	0	0	0	0
Abl	Abl tyrosine kinase	FBtr0345369	FBgn0000017	12510	GO:0007391,GO:0005737,GO:0008360,GO:0046777,GO:0001764,GO:0038083,GO:0005524,GO:0019897,GO:0007169,GO:0007370,GO:0070938,GO:0005927,GO:0018108,GO:0030424,GO:0004715,GO:0048749,GO:0007417,GO:0048813,GO:0045179,GO:0002009,GO:0005938,GO:0021785,GO:0042127,GO:0005102,GO:0003402,GO:0004713,GO:0007303,GO:0005515,GO:0031234,GO:0005911,GO:0010906,GO:0045087,GO:0016199,GO:0007411,GO:0008045,GO:0006468,GO:…		6.17	6.95	11.35	19.17	12	26.97	10.13	4.82	2.71	5.74		2.22	9.26	109.29	58.96	5.47	3.66	3.54	7.61	4.05	18.72	31.29	31.52	12.84	0	27.66	39.12	6.65	8.97	2.49	3.23	7.75	9.66	33.59	5.35	28.57	28.63	1.14	0.93	0	1.04	1.81	0
abo	abnormal oocyte	FBtr0080168	FBgn0000018	1794	GO:0048477,GO:0000122,GO:0005700,GO:0003682,GO:0005634		0	0.5	0.68	0	0	0	2.17	0.5	0	1.05		0.63	0	0	0	0	0	0	0	0	0	0.29	0	0	0	0	0	0.11	16.69	2.41	2.85	0	0	0	0	0.12	0	0	8.46	0	0.41	0	29.75
ac	achaete	FBtr0070072	FBgn0000022	917	GO:0008407,GO:0007400,GO:0000977,GO:0007422,GO:0007399,GO:0003677,GO:0048477,GO:0045893,GO:0061331,GO:0043565,GO:0007417,GO:0007346,GO:0010906,GO:0061382,GO:0003700,GO:0002805,GO:0006355,GO:0046982,GO:0006357,GO:0005667,GO:0090575,GO:0005634,GO:0007419,GO:0007423,GO:0050767		0	0	0	0	0	0	0	0	0	0		0	0	0	0	0	0	0	0	0	0	0	0	0	0	0	0	0	0	0	0	0	0	0	0	0	0	0	0	0	0	0	0
Ace	Acetylcholine esterase	FBtr0082780	FBgn0000024	7980	GO:0005737,GO:0006581,GO:0003990,GO:0005886,GO:0042803,GO:0004104,GO:0042331,GO:0001507,GO:0042426,GO:0007268		33.49	38.02	39.37	75.29	52.8	63.79	71.47	15.79	4.81	11.39		95.81	157.12	519.14	248.88	94.22	109.28	24.8	23.54	37.08	76.92	62.76	39.64	277.56	130.36	227.7	70.01	63.87	85.32	42.15	67.48	55.27	92.54	145.22	50.55	143.47	374.89	14.55	13.56	16.83	18.69	16.33	327.22
Ace	Acetylcholine esterase	FBtr0300486	FBgn0000024	4076	GO:0005737,GO:0006581,GO:0003990,GO:0005886,GO:0042803,GO:0004104,GO:0042331,GO:0001507,GO:0042426,GO:0007268		0	0	0	0	16.27	0	0	0	0	7.7		0.33	0	0	0	3.04	39.77	0	0	0	0	0	0	0	1.84	0	41.56	0	0	37.17	0	10.85	11.78	0	0	0	0	0	0.57	0	3.88	0	0
Ace	Acetylcholine esterase	FBtr0335223	FBgn0000024	3262	GO:0005737,GO:0006581,GO:0003990,GO:0005886,GO:0042803,GO:0004104,GO:0042331,GO:0001507,GO:0042426,GO:0007268		0	0.08	0	0	17.1	0	0	0	0	0		0.53	0	0.95	0	1.42	7.55	0	0	0	0	0.57	0	0.23	0	0	0	5.78	10.1	16.57	0	3.15	0.91	0.98	0	0.18	0	39.89	33.33	19.46	40.45	34.64	44.88
acj6	abnormal chemosensory jump 6	FBtr0074015	FBgn0000028	2690	GO:0007636,GO:0070983,GO:0045944,GO:0043565,GO:0048813,GO:0007411,GO:0003700,GO:0050911,GO:0008039,GO:0003714,GO:0005634		0	0	0	0	0	0	0	0	0	0		0	0	0	0	0	0	0	0	0	0	0	0	0	0	0	0	0	0	0	0	0	0	0	0	0	0	0	0	0	0	0	0
acj6	abnormal chemosensory jump 6	FBtr0100326	FBgn0000028	2606	GO:0007636,GO:0070983,GO:0045944,GO:0043565,GO:0048813,GO:0007411,GO:0003700,GO:0050911,GO:0008039,GO:0003714,GO:0005634		0	0	0	0	0	0	0	0	0	0		0	0	0	0	0	0	0	0	0	0	0	0	0	0	0	0	0	0	0	0	0	0	0	0	0	0	0	0	0	0	0	0
acj6	abnormal chemosensory jump 6	FBtr0100328	FBgn0000028	3518	GO:0007636,GO:0070983,GO:0045944,GO:0043565,GO:0048813,GO:0007411,GO:0003700,GO:0050911,GO:0008039,GO:0003714,GO:0005634		0	0	0	0	0	0	0	0	0.71	0		7.93	8.58	0	0	0	0.34	3.2	6.7	0	0	0.24	0	30.64	0	0	0.81	0.52	0	0	0	0	7.38	0	0.11	0	0.2	0	0.37	0	0	0	4.57
acj6	abnormal chemosensory jump 6	FBtr0290063	FBgn0000028	2627	GO:0007636,GO:0070983,GO:0045944,GO:0043565,GO:0048813,GO:0007411,GO:0003700,GO:0050911,GO:0008039,GO:0003714,GO:0005634		0	0	0	0	0	0	0	0	0	0		0	0	0	0	0	0	0	0	0	0	0	0	0	0	0	0	0	0	0	0	0	0	0	0	0	0	0	0	0	0	0	0
acj6	abnormal chemosensory jump 6	FBtr0290064	FBgn0000028	2594	GO:0007636,GO:0070983,GO:0045944,GO:0043565,GO:0048813,GO:0007411,GO:0003700,GO:0050911,GO:0008039,GO:0003714,GO:0005634		0	0	0	0	0	0	0	0	0	0		0	0	0	0	0	0	0	0	0	0	0	0	0	0	0	0	0	0	0	0	0	0	0	0	0	0	0	0	0	0	0	0
acj6	abnormal chemosensory jump 6	FBtr0305189	FBgn0000028	2663	GO:0007636,GO:0070983,GO:0045944,GO:0043565,GO:0048813,GO:0007411,GO:0003700,GO:0050911,GO:0008039,GO:0003714,GO:0005634		0	0	0	0	0	0	0	0	0	0		0	0	0	0	0	0	0	0	0	0	0	0	0	0	0	0	0	0	0	0	0	0	0	0	0	0	0	0	0	0	0	0
acj6	abnormal chemosensory jump 6	FBtr0305190	FBgn0000028	2573	GO:0007636,GO:0070983,GO:0045944,GO:0043565,GO:0048813,GO:0007411,GO:0003700,GO:0050911,GO:0008039,GO:0003714,GO:0005634		0	0	0	0	0	0	0	0	0	0		0	18.33	0	29.02	0	0	0	0	0	0.7	0.25	0	0	0.49	0	0	0	2.94	0	0	0	0	0	0	0	0	0	0	0	0	0	0
acj6	abnormal chemosensory jump 6	FBtr0305191	FBgn0000028	4343	GO:0007636,GO:0070983,GO:0045944,GO:0043565,GO:0048813,GO:0007411,GO:0003700,GO:0050911,GO:0008039,GO:0003714,GO:0005634		0.21	0.32	0	0.07	0	0	0	0	0	0		4.66	1.09	0	0.12	0.86	0	0.16	0.51	0	0	0	0	4.09	0.22	1.48	0	0	0	0	0	0	5.82	0.43	0	0.64	0	0	0	0.55	0.23	1.15	0
acj6	abnormal chemosensory jump 6	FBtr0305192	FBgn0000028	2579	GO:0007636,GO:0070983,GO:0045944,GO:0043565,GO:0048813,GO:0007411,GO:0003700,GO:0050911,GO:0008039,GO:0003714,GO:0005634		0	0	0	0	0	0	0	0	0	0		0	0	0	0	0	0	0	0	0	0	0	0	0	0	0	0.79	0	0	0	0	0	0	0	0	0	0	0	0	0	0	0	0
acj6	abnormal chemosensory jump 6	FBtr0305193	FBgn0000028	2612	GO:0007636,GO:0070983,GO:0045944,GO:0043565,GO:0048813,GO:0007411,GO:0003700,GO:0050911,GO:0008039,GO:0003714,GO:0005634		0	0	0	0	0	0	0	0	0	0		0	0	0	0	0	0	0	0	0	0	0	0	0	0	0	0	0	0	0	0	0	0	0	0	0	0	0	0	0	0	0	0
acj6	abnormal chemosensory jump 6	FBtr0305194	FBgn0000028	2630	GO:0007636,GO:0070983,GO:0045944,GO:0043565,GO:0048813,GO:0007411,GO:0003700,GO:0050911,GO:0008039,GO:0003714,GO:0005634		0	0	0	0	0	0	0	0	0	0		3.22	0	0	0	0	0	0	0	0	0	0	0	0	0	0	0	0	0	0	0	0	1.37	0	0	0	0	0	0	0	0	0	0
acj6	abnormal chemosensory jump 6	FBtr0305195	FBgn0000028	2651	GO:0007636,GO:0070983,GO:0045944,GO:0043565,GO:0048813,GO:0007411,GO:0003700,GO:0050911,GO:0008039,GO:0003714,GO:0005634		0	0	0	0	0	0	0	0	0	0		0	0	0	0	0	0	0	0	0	0	0	0	0	0	0	0	0	0	0	0	0	0	0	0	0	0	0	0	0	0	0	0
acj6	abnormal chemosensory jump 6	FBtr0305196	FBgn0000028	2636	GO:0007636,GO:0070983,GO:0045944,GO:0043565,GO:0048813,GO:0007411,GO:0003700,GO:0050911,GO:0008039,GO:0003714,GO:0005634		0	0	0	0	0	0	0	0	0	0		0	0	0	0	0	0	0	0	0	0	0	0	0	0	0	0	0	0	0	0	0	0	0	0	0	0	0	0	0	0	0	0
Acph-1	Acid phosphatase 1	FBtr0085609	FBgn0000032	1944	GO:0070062,GO:0042803,GO:0003993,GO:0016311,GO:0005634		4.15	0	0	0	0	0	0	4.97	0	5.06		1.38	0	0	0	1.16	0	0	0	0	0	2.68	0	0	0	0	0	11.66	0.79	7.75	0	0	0	0	0	0	0	0	0	0	0	0	0
Acph-1	Acid phosphatase 1	FBtr0085610	FBgn0000032	1889	GO:0070062,GO:0042803,GO:0003993,GO:0016311,GO:0005634		0	3.68	5.35	16.97	0	1.69	0.54	0.64	0.17	0		0	1.77	0	0	1.03	0	4.07	0	0	1.2	0	2.7	1.02	0	0	4.65	5.1	0.48	0.12	0.06	1.35	6.57	4.82	0	0.06	0	0	0	0.86	0.19	4.29	2.67
nAChRalpha1	nicotinic Acetylcholine Receptor alpha1	FBtr0084619	FBgn0000036	3826	GO:0022848,GO:0005892,GO:0015464,GO:0045211,GO:0007271,GO:0098655,GO:0017085		0	0	0	0	0	9.13	0	0	0	0		0	0	0	0	0	0	0	0	0	0	0	0	0	0	0	0	0	5.32	0	0	1.2	12.17	0	0	0	0	0	0	0	0.89	0	0
nAChRalpha1	nicotinic Acetylcholine Receptor alpha1	FBtr0330310	FBgn0000036	3826	GO:0022848,GO:0005892,GO:0015464,GO:0045211,GO:0007271,GO:0098655,GO:0017085		0	0	0	0	0	9.13	0	0	0	0		0	0	0	0	0	0	0	0	0	0	0	0	0	0	0	0	0	5.32	0	0	1.2	12.17	0	0	0	0	0	0	0	0.89	0	0
nAChRalpha1	nicotinic Acetylcholine Receptor alpha1	FBtr0334916	FBgn0000036	11027	GO:0022848,GO:0005892,GO:0015464,GO:0045211,GO:0007271,GO:0098655,GO:0017085		108.08	122.64	130.54	126.43	156.88	96.41	115.01	81.93	36.56	68.55		28.83	358.27	280.7	103.82	40.82	56.9	66.58	61.72	171.82	205.41	167.7	104.53	140.98	440.46	741.65	282.6	81.73	51.93	67.15	78.93	34.45	46.09	247.61	503.4	246.05	511.31	0.08	0	0.66	0.04	0.62	29.45
mAChR-A	muscarinic Acetylcholine Receptor, A-type	FBtr0072367	FBgn0000037	5370	GO:0005887,GO:0007197,GO:0007213,GO:0007271,GO:0007200,GO:0016907,GO:0008227,GO:0007207,GO:0016021,GO:0045202		32.69	31.68	29.04	6.4	22.69	0	0	49.92	0	54.42		8.73	41.03	0	0	19.34	0	0	12.05	86.25	0	41.81	8.57	40.48	1.78	90.39	26.72	15.94	10.47	29.67	5.23	20.84	15.92	45.26	0	3.34	106.79	0	6.92	10.68	6.11	19.73	41.52
mAChR-A	muscarinic Acetylcholine Receptor, A-type	FBtr0072368	FBgn0000037	5425	GO:0005887,GO:0007197,GO:0007213,GO:0007271,GO:0007200,GO:0016907,GO:0008227,GO:0007207,GO:0016021,GO:0045202		53.71	62.79	51.68	46.21	0	21.16	24.03	65.03	47.05	43.24		9.43	11.68	129.81	87.54	34.25	39.01	95.28	89.14	7.08	55.58	81.41	103.58	15.16	94.33	0	38.64	17.17	24.09	0	22.04	12.48	22.48	45.04	92.17	59.42	0	10.35	6.31	3.98	10.95	0	1.51
nAChRbeta1	nicotinic Acetylcholine Receptor beta1	FBtr0073299	FBgn0000038	2460	GO:0022848,GO:0005892,GO:0007271,GO:0016021,GO:0045211,GO:0006811		477.14	530.28	484.76	713.16	361.68	405.96	607	415.79	252.74	368.53		99.91	464.2	1744.27	631.88	456.99	507.24	210.07	193.01	83.97	374.86	474.83	338.83	470.8	799.7	949.91	291.95	418.96	367.02	570.82	360.53	283.91	215.22	353.36	544.02	456.76	1091.66	70.74	92.84	116.97	157.83	92.1	233.14
nAChRbeta1	nicotinic Acetylcholine Receptor beta1	FBtr0073300	FBgn0000038	818	GO:0022848,GO:0005892,GO:0007271,GO:0016021,GO:0045211,GO:0006811		396.86	600.53	604.44	784.4	258.06	481.49	581.39	660.64	317.73	530.4		87.21	456.22	1640.94	723.4	557.91	370	96.72	115.42	155.12	139.06	484.02	411.13	407.84	841.58	1382.03	178.06	528.52	447.88	445.88	711.26	351.41	338.2	253.15	921.33	802.94	1032.54	170.54	225.31	277.21	313.09	165.09	48.39
nAChRalpha2	nicotinic Acetylcholine Receptor alpha2	FBtr0084639	FBgn0000039	2387	GO:0022848,GO:0005892,GO:0007271,GO:0098655,GO:0015464,GO:0045211		35.93	28.15	28.91	39.76	0	0	0	13.2	0	5.64		5.67	0	319.92	0	7.29	0	0	0	0	0	0	0	6.13	45.84	1.76	33.56	12.04	74.65	12.02	17.11	89.31	1.29	119.78	0	92.29	0	0	0	0	0	0	0
nAChRalpha2	nicotinic Acetylcholine Receptor alpha2	FBtr0084640	FBgn0000039	2319	GO:0022848,GO:0005892,GO:0007271,GO:0098655,GO:0015464,GO:0045211		38.36	13.87	55.37	13.13	11.11	38.92	115.92	9.13	24.25	43.64		8.05	45.21	44.06	21.57	55.01	33.48	2.48	327.8	0.06	87.95	18.68	10.75	0	41.1	8.02	0	31.87	0	223.55	85.48	7.32	14.25	2.15	71.66	29.64	5	2.2	5.13	1.77	3.93	4.21	21.93
Act5C	Actin 5C	FBtr0070822	FBgn0000042	1637	GO:0035148,GO:0006909,GO:0032507,GO:0031011,GO:0007291,GO:0006338,GO:0016319,GO:0002121,GO:0035060,GO:0005884,GO:0007010,GO:0000281,GO:0005200		63.78	0	0	0	0	0	0	0	58.82	0		0	0	0	0	0	0	0	0	0	0	0	0	0	0	0	0	0	128.22	0	0	0	0	0	0	0	0	0	0	0	406.5	0	0
Act5C	Actin 5C	FBtr0070823	FBgn0000042	2653	GO:0035148,GO:0006909,GO:0032507,GO:0031011,GO:0007291,GO:0006338,GO:0016319,GO:0002121,GO:0035060,GO:0005884,GO:0007010,GO:0000281,GO:0005200		54.88	65.83	42.31	36.55	1.42	5	90.68	28.18	45.54	31.08		32.22	81.09	1.59	87.07	91.51	23.56	0.32	2.04	0	3.58	31.3	29.19	2.27	21.2	0.59	0	27.73	95.54	33.26	36.06	13.74	36.59	12.82	1.36	62.14	65.89	25.91	108.79	70.28	140.13	53.8	2.88
Act5C	Actin 5C	FBtr0100662	FBgn0000042	2252	GO:0035148,GO:0006909,GO:0032507,GO:0031011,GO:0007291,GO:0006338,GO:0016319,GO:0002121,GO:0035060,GO:0005884,GO:0007010,GO:0000281,GO:0005200		233.26	283.94	316.7	345.51	19.16	259.84	0	218.33	35.08	144.26		103.05	943.12	1158.13	1366.35	166.06	288.24	473.74	218.45	686.37	1507.11	748.3	727.02	525.86	872.01	1009.26	306.86	242.52	102.65	110.15	143.05	267.03	65.41	327.26	221.61	202.99	896.01	113.72	9.03	24.44	0	81.26	184.12
Act5C	Actin 5C	FBtr0100663	FBgn0000042	1928	GO:0035148,GO:0006909,GO:0032507,GO:0031011,GO:0007291,GO:0006338,GO:0016319,GO:0002121,GO:0035060,GO:0005884,GO:0007010,GO:0000281,GO:0005200		1312.76	1612.65	1553.57	202.79	46.54	89.54	1055.89	549.62	389.56	476.97		453.65	1913.85	91.21	3332.51	961.29	673.68	3029.65	1516.7	1935.76	2722.75	864.47	620.99	1281.27	250.7	2251.26	1564.68	609.97	652.52	820.57	1113.6	643.43	648.32	106.51	2373.04	299.42	2909.73	245.18	375.7	351.82	162.18	357.67	1249.05
Act5C	Actin 5C	FBtr0345894	FBgn0000042	2863	GO:0035148,GO:0006909,GO:0032507,GO:0031011,GO:0007291,GO:0006338,GO:0016319,GO:0002121,GO:0035060,GO:0005884,GO:0007010,GO:0000281,GO:0005200		0.4	1.77	0.86	0	0	0	0	1.32	0.81	0.96		0.96	2.03	0	0	2.4	0.67	0	0	0.6	0	15	0	0	2.33	0	0	0.35	0	0	2.98	0	3.95	23.82	0	3.28	0	0	0	0	1.35	0	0
Act42A	Actin 42A	FBtr0086029	FBgn0000043	1626	GO:0006909,GO:0035060,GO:0005884,GO:0007010,GO:0000281,GO:0005200		15.29	21.6	14.44	0.38	23.13	3.48	0.64	8.48	35.76	7.64		6.51	18.38	0	0	10.72	5.32	0.36	2.36	0.66	0.44	32.47	3.19	0.87	4.57	5.16	0	107.59	3.14	0.08	17.44	2.13	0.18	10.95	0	18.13	0	27.5	48.79	32.98	64.32	47.92	66.39
Act57B	Actin 57B	FBtr0071519	FBgn0000044	1724	GO:0050807,GO:0098529,GO:0007507,GO:0005886,GO:0007010,GO:0005884,GO:0000281,GO:0005200		0	0	0	0	0	0	0	0	0	0		0.62	0	0	0	5.23	0.14	0.08	0	0	0	2.04	0	0.27	1.02	1.74	0	93.68	0	0	5.45	0	2.7	0.17	0	0.32	0	0.18	0	0	0	0	0
Act79B	Actin 79B	FBtr0078478	FBgn0000045	1543	GO:0005884,GO:0007010,GO:0005200		0.21	0	0	0	0	0	0	0	0	0		0	0	0	0	6.8	0	0	0	0	0	0.26	0	0.09	0	0	0.14	0	3.75	0	34.91	0.07	0	0	0	0.09	0.16	0	0	0	0	0	0
Act79B	Actin 79B	FBtr0334090	FBgn0000045	1619	GO:0005884,GO:0007010,GO:0005200		0	0	0	0	0	0	0	0	0	0		1.51	0	0	0	0	0	0	0	0	0	0	0	0	1.77	0.62	0	17.55	0	0	0	0	0.68	0	0	0	0	0	0	0	0	0	0
Act87E	Actin 87E	FBtr0082785	FBgn0000046	1567	GO:0035267,GO:0016573,GO:0043486,GO:0005884,GO:0007010,GO:0005200		0.55	0	0.16	0	0	0	0.07	17.57	0.41	2.2		0.16	0	0	0.15	0.89	0.08	0.09	0.15	0	0	0	0	0	0.29	0.09	0	62.71	0.08	0	7.11	0	0.13	0	0.13	0.71	0	0	0	0	0	0	0
Act87E	Actin 87E	FBtr0082786	FBgn0000046	1643	GO:0035267,GO:0016573,GO:0043486,GO:0005884,GO:0007010,GO:0005200		0	0	0	0	0	0	0	0	0	2.39		0	0	0	0	0	0	0	0	0	0	1.9	0	0	0	0	0	3.59	0	0	0	0	0	0	0	0	0	0	0	0	0	0	0
Act87E	Actin 87E	FBtr0346242	FBgn0000046	1853	GO:0035267,GO:0016573,GO:0043486,GO:0005884,GO:0007010,GO:0005200		0	0.72	0	0	0	0	0	0	0	0		0	0	0	0	0	0	0	0	0	0	0.6	0	0	0	0	6.34	0.08	0	0	0	0	0	0	0	0	0	0	0	0	0	0	0
Act88F	Actin 88F	FBtr0083143	FBgn0000047	1595	GO:0006909,GO:0071689,GO:0014866,GO:0005884,GO:0007010,GO:0005200		0	0	0	0	0	0	0	0	0	0		0.41	0	0	0	5.71	0	0	0	0	0.27	0	0.09	0	7.73	0.41	0	0	0	0.16	9.89	0	0.19	0.06	0.13	0.26	0	0	0	0	0	0	0
ade2	adenosine 2	FBtr0079219	FBgn0000052	4281	GO:0004642,GO:0005737,GO:0006164,GO:0006189		0.07	0	0	0	0	0	0	0	0	0.02		0.01	0	0	0	0	0	0	0	0	0	0	0	0	0	0	0	0	0	0	0	0	0.02	0	0	0	0	0	0	0	0	0	0
ade2	adenosine 2	FBtr0079220	FBgn0000052	4337	GO:0004642,GO:0005737,GO:0006164,GO:0006189		0	0	0	0	0	0	0	0	0	0		0	0	0	0	0	0	0	0	0	0	0	0	0	0	0	0	0	0	0	0	0	0	0.04	0	0	0	0	0	0	0	0	0
ade2	adenosine 2	FBtr0079221	FBgn0000052	4277	GO:0004642,GO:0005737,GO:0006164,GO:0006189		0.33	2.3	0	0.13	0	1.54	0	0.53	1.18	2.91		1.21	0	0	0	0	0	0	0	0	0	0.43	0	0.19	0	0	0	0.27	0	0.08	0	0	4.64	0	0	0.02	0	0	0	0.14	0	0	0
ade3	adenosine 3	FBtr0079431	FBgn0000053	4480	GO:0004641,GO:0005524,GO:0009113,GO:0004637,GO:0005829,GO:0006189,GO:0046872,GO:0004644		0.16	0	0	0	0	0	0	1.17	0	0		0	0	0	0	0.14	0	0	0	0	0	0.25	0	0.32	0	0	0	0	0	0	0	0	0	0	0	0	0	0	0	0	0	0	0
ade3	adenosine 3	FBtr0100353	FBgn0000053	1556	GO:0004641,GO:0005524,GO:0009113,GO:0004637,GO:0005829,GO:0006189,GO:0046872,GO:0004644		0	0	0	0	0	0	0	0	0	0.66		0.47	0	0	0	0	0	0	0	0	0	0	0	0	0.1	0.09	0	0.13	0	0	0	0	0	0	0	0	0	0	0	0	0	0	0
ade3	adenosine 3	FBtr0339663	FBgn0000053	4718	GO:0004641,GO:0005524,GO:0009113,GO:0004637,GO:0005829,GO:0006189,GO:0046872,GO:0004644		0	0.07	0	0	0	0	0	0	0	0		0.45	0	0	0	0	0	0.06	0	0	0	0	0	0	0	0	0	0	0.94	0	0	0	1.94	0	0	0	0	0	0	0	0	0	0
Adh	Alcohol dehydrogenase	FBtr0100589	FBgn0000055	1057	GO:0006117,GO:0006066,GO:0048149,GO:0042803,GO:0043234,GO:0006069,GO:0046164,GO:0006067,GO:0004022,GO:0005829,GO:0008774		0	3.68	1.75	0	0	0	0	0	0	32.05		599.28	0	6.75	0	0	0	0	7.38	0	0	0	11.37	46.61	157.73	0	1.48	5.44	3.28	0	3.44	0	545.25	264.9	0	14.25	0	0	0	4.19	31.18	4.89	0
Adh	Alcohol dehydrogenase	FBtr0100590	FBgn0000055	1001	GO:0006117,GO:0006066,GO:0048149,GO:0042803,GO:0043234,GO:0006069,GO:0046164,GO:0006067,GO:0004022,GO:0005829,GO:0008774		6.98	11.72	11.53	1.64	0	0	0	8.29	2.48	6.2		1107.87	0.75	162.58	71.69	19.77	0.27	0	4.78	0.14	0.15	84.08	44.21	546.97	8.26	8.62	0	0	0	82.19	27.46	87.79	1362.01	85.1	0	86.41	0	0.35	0	36.78	2.62	28.16	0.19
Adh	Alcohol dehydrogenase	FBtr0100591	FBgn0000055	2080	GO:0006117,GO:0006066,GO:0048149,GO:0042803,GO:0043234,GO:0006069,GO:0046164,GO:0006067,GO:0004022,GO:0005829,GO:0008774		0	0.2	0	0	0	0	0	0	0	0		6.46	0	0	0	0	0	0	0	0	0	0	0.32	2.18	0.67	0	0	0.09	0	0	0	0	4.07	1.15	0	0	0	0	0	0.27	0	0	0
Adh	Alcohol dehydrogenase	FBtr0100593	FBgn0000055	2024	GO:0006117,GO:0006066,GO:0048149,GO:0042803,GO:0043234,GO:0006069,GO:0046164,GO:0006067,GO:0004022,GO:0005829,GO:0008774		0.19	0	0	0	0	0	0	0	0	0		1.2	0	0	0	0.06	0	0	0.12	0	0	0.25	0	0.6	0.01	0.18	0	0	0	0	0	0	0.89	0.11	0	0	0	0	0	0	0	0.32	0
Adh	Alcohol dehydrogenase	FBtr0100594	FBgn0000055	1231	GO:0006117,GO:0006066,GO:0048149,GO:0042803,GO:0043234,GO:0006069,GO:0046164,GO:0006067,GO:0004022,GO:0005829,GO:0008774		0.41	0	2.44	0	0	0	0	1.75	0	0.48		2.81	0	0	0	7.94	0	0	0	0	0	0	0	33.86	0.6	0	0	0	0	0	0	0	0.99	8.53	0	0	0	0	0	0	0	2.84	0
Adhr	Adh-related	FBtr0006151	FBgn0000056	2080	GO:0055114,GO:0005575,GO:0004022,GO:0051287		0	0.2	0	0	0	0	0	0	0	0		6.46	0	0	0	0	0	0	0	0	0	0	0.32	2.18	0.67	0	0	0.09	0	0	0	0	4.07	1.15	0	0	0	0	0	0.27	0	0	0
Adhr	Adh-related	FBtr0100187	FBgn0000056	2024	GO:0055114,GO:0005575,GO:0004022,GO:0051287		0.19	0	0	0	0	0	0	0	0	0		1.2	0	0	0	0.06	0	0	0.12	0	0	0.25	0	0.6	0.01	0.18	0	0	0	0	0	0	0.89	0.11	0	0	0	0	0	0	0	0.32	0
Adhr	Adh-related	FBtr0343699	FBgn0000056	915	GO:0055114,GO:0005575,GO:0004022,GO:0051287		0	0.25	1.32	4.38	0	0	0	0	0	0		0	0	0	0	0	0	0	0	0	0	5.71	1.05	0	31.65	0	0	0	0	0	0	0	0	0	0	1.09	0	3.16	0	0	0	0	0
adp	adipose	FBtr0086744	FBgn0000057	2291	GO:0006629,GO:0003674,GO:0005975,GO:0009269,GO:0005575,GO:0010891,GO:0010883		0	4.1	0	0	0	0	0	5.44	0	0		0	0	0	0	0	0	0	1.66	0	0	0	0	0	0	0.34	0	0	4.76	0	0	0	0	0	0	0	0	0	0	0	0	0	0
adp	adipose	FBtr0340288	FBgn0000057	2241	GO:0006629,GO:0003674,GO:0005975,GO:0009269,GO:0005575,GO:0010891,GO:0010883		5.09	6.21	11.95	0	6.91	0	0	6.19	1.97	5.49		2.71	0.98	0	0	2.99	0.17	0	5.68	3.55	0	1.83	1.59	22.12	0.38	0	0	0.04	12.17	5.76	6.78	1.22	0.3	6.29	0	1.68	0.74	0.67	4.27	2.55	15.89	0.67	10.56
al	aristaless	FBtr0078053	FBgn0000061	1806	GO:0045747,GO:0035015,GO:0043565,GO:0035218,GO:0043234,GO:0022416,GO:0045892,GO:0048800,GO:0007480		0	0	0.27	0	0	0	0	0	0	0		0	0	0	0	0	0	0	0	0	0	0.51	0	0	0	0	0	0.28	0	0	0	0	0	0	0	0	0	0	0	0	0	0	5.56
Mps1	Monopolar spindle 1	FBtr0083478	FBgn0000063	2113	GO:0004672,GO:0044779,GO:0016321,GO:0033316,GO:0000776,GO:0005524,GO:0007094,GO:0051321,GO:0004712,GO:0007143,GO:0006468,GO:0032837,GO:0001666,GO:0043060,GO:0005819,GO:0000705,GO:0033046,GO:0000942,GO:0005813,GO:0048133		3.5	7.82	4.62	1.06	0	0.91	5.87	2.17	9.43	0.65		0.79	1.83	0	0.11	1.72	0.06	0.07	3.99	26.97	14.39	1.28	3.54	1.9	15.77	0.06	0	2.18	0	2.56	0.05	0.2	16.2	0.18	1.46	0	0	0	0	0.76	0	0.54	0.3
Mps1	Monopolar spindle 1	FBtr0331348	FBgn0000063	2141	GO:0004672,GO:0044779,GO:0016321,GO:0033316,GO:0000776,GO:0005524,GO:0007094,GO:0051321,GO:0004712,GO:0007143,GO:0006468,GO:0032837,GO:0001666,GO:0043060,GO:0005819,GO:0000705,GO:0033046,GO:0000942,GO:0005813,GO:0048133		0	1.04	0	0	1.28	0	0	0	0	0		0.57	0	0	0	0	0	0	0	0	0	0	0	1	0	0	0	0	0	0	0	0	0	0	0	0	0	0	0	0	0	0	0
Ald	Aldolase	FBtr0084994	FBgn0000064	2636	GO:0007095,GO:0006096,GO:0004332,GO:0031430,GO:0007498,GO:0030018,GO:0005829		138.33	129.57	167.68	57.03	66.12	47.5	74.97	52.09	43.64	45.52		118.35	520.14	398.94	91.09	138.35	101.1	305.43	182.97	618.46	232.94	439.32	891.83	269.75	198.97	250.48	17	104.96	56.07	17.96	41.22	54.18	108.93	235.83	290.74	192.08	444.38	570.58	618.63	553.3	546.3	671.36	1581.64
Ald	Aldolase	FBtr0084995	FBgn0000064	1279	GO:0007095,GO:0006096,GO:0004332,GO:0031430,GO:0007498,GO:0030018,GO:0005829		0	0.34	0	0	0	0	0	8.02	0	0		0.56	0	0	0	7.15	0	0	0.67	0	0	6.04	0	0	0	0	0	6.31	7.09	0	0	46.72	0.53	38.68	0	20.55	0	1465.67	1224.68	1914.56	2065.45	1906.33	0
Ald	Aldolase	FBtr0084999	FBgn0000064	1483	GO:0007095,GO:0006096,GO:0004332,GO:0031430,GO:0007498,GO:0030018,GO:0005829		8.04	7.8	0.46	2.02	0	0	33.97	4.27	0.33	1.71		6.52	3.72	0	2.14	27.6	0	1	2.73	0	4.46	20.2	0	0	0	13.67	0.24	1.83	23.65	0	38.9	16.2	0.01	107.81	0	49.54	0	45.32	28.23	33.88	69.61	23.22	0.72
Ald	Aldolase	FBtr0085000	FBgn0000064	1747	GO:0007095,GO:0006096,GO:0004332,GO:0031430,GO:0007498,GO:0030018,GO:0005829		2.34	1.69	15.33	0	0	0	0	3.76	0	1.52		0.75	1.6	9.67	0	0.98	7.09	0	0	0.59	0	15.33	31.6	5.67	14.21	0.01	0	17.55	2.89	26.34	1.02	0	2.52	6.74	0	2.53	3.7	0	0	0	0	0	0
Ald	Aldolase	FBtr0085001	FBgn0000064	1618	GO:0007095,GO:0006096,GO:0004332,GO:0031430,GO:0007498,GO:0030018,GO:0005829		0	0	0	0	0	0	0	0	0	0		3.31	0	0	0	0	0	0	0	0	0	0	0	0	0	0	0	0	0	0	0	0	0	0	0	9.43	0	22.11	21.47	4.06	88.73	26.21	0
Ald	Aldolase	FBtr0114544	FBgn0000064	1736	GO:0007095,GO:0006096,GO:0004332,GO:0031430,GO:0007498,GO:0030018,GO:0005829		0.04	0	6.92	0	0	0	0	0.03	0	0.16		1.08	0	0	0	0.94	0	0	2.97	3.12	0	14.95	6.83	3.89	18.66	0.8	0	3.08	0.02	0	0.05	0	0.41	8.99	0	4.74	0	0	0	0	0	0	0
Ald	Aldolase	FBtr0306657	FBgn0000064	1614	GO:0007095,GO:0006096,GO:0004332,GO:0031430,GO:0007498,GO:0030018,GO:0005829		0	0.45	0.28	0	0	0	0	0.94	0.37	0		0.49	2.06	0	0	0.23	0.18	0.63	0.17	0	0.2	0	0.27	0	7.3	0	0	0	0.55	0	3.11	1.1	0	0.86	0	0	0	0	21.55	16.34	40.86	10.28	0.12
Ald	Aldolase	FBtr0310660	FBgn0000064	1472	GO:0007095,GO:0006096,GO:0004332,GO:0031430,GO:0007498,GO:0030018,GO:0005829		6.53	10.93	2.77	0.51	0	0	56.51	4.3	0.17	3.79		7.96	7.33	0	0	0	0	1.57	1.66	0	0	19.3	0	0	0	13.39	0.25	1.06	1.2	0	26.55	5.54	0.62	154.27	0	66.37	0	563.3	854.44	587.37	1601.53	693.2	0
Ald	Aldolase	FBtr0310661	FBgn0000064	1615	GO:0007095,GO:0006096,GO:0004332,GO:0031430,GO:0007498,GO:0030018,GO:0005829		0	0	0	0	0	0	0	0	0	0		0	0	0	0	0	0	0	0	0	0	0	0	0	0	0	0	0	0	0	0	4.43	0.96	0	0	14.39	0	0	0	0	752.46	0	0
Ald	Aldolase	FBtr0339614	FBgn0000064	2102	GO:0007095,GO:0006096,GO:0004332,GO:0031430,GO:0007498,GO:0030018,GO:0005829		82.45	75.49	106.34	13.8	0	0	0	87.33	14.03	36.36		113.36	345.13	0	0	91.6	101.03	0	162.47	0	378.83	398.46	98.77	17.44	0	0	68.2	13.64	82.23	109.78	163.25	68.37	119.72	113.98	57.08	129.58	179.55	0	27.47	0	274.24	0	0
Ama	Amalgam	FBtr0081618	FBgn0000071	1833	GO:0019991,GO:0005886,GO:0005918		0	0	0	0	0	0	0	0	0	0		0	0	0	0	0	0	0	0	0	0	0	0	0	0	0	0	0	0	0	0	0	0	0	0	0	0	0	0	0	0	0	0
Ama	Amalgam	FBtr0081619	FBgn0000071	1542	GO:0019991,GO:0005886,GO:0005918		0	0	0	0	0	0	0	0	0	0		0	0	0	0	0	0	0	0	0	0	0	0	0.49	0	0	0	0	0	0	0	0	0	0	0	0	0	0	0	0	0	0	0
Ama	Amalgam	FBtr0081620	FBgn0000071	1526	GO:0019991,GO:0005886,GO:0005918		0	0	0	0	0	0	0	0	0	0		0.34	0	0	0	0	0	0	0	0	0	0	0	0	0	0.09	0	2.95	0	0	0	0	0	0	0	0	0	0	0	0	0	0	0
amd	alpha methyl dopa-resistant	FBtr0081153	FBgn0000075	1749	GO:0006520,GO:0016831,GO:0006584,GO:0030170,GO:0019239,GO:0040003		0.24	0.13	0	0	0	0	0	0	0	0		0.51	0	0.12	0	0	4.48	0	0.69	0	0	0	0	0	0	0	0	4.12	0	13.86	0	0	0	0	0	0	0	0	0	0	0	0	0
amd	alpha methyl dopa-resistant	FBtr0081154	FBgn0000075	1792	GO:0006520,GO:0016831,GO:0006584,GO:0030170,GO:0019239,GO:0040003		0	0	0.27	0	0	0	0	0	0	0		0	0	0	0	0	0	0	0.9	0	0	0	2.86	0	0	0	0	1.3	6.58	0	0	0	0	0	0	0.37	0	0	0	0	0	0	0
amx	almondex	FBtr0071331	FBgn0000077	1422	GO:0045747,GO:0007220,GO:0007498,GO:0046331,GO:0007398,GO:0001713,GO:0044214		0	0	0	0	0	0	0	0	0	0		0.26	0	0	0	0	0	0	0	0	0	0	0	4.32	0	0	0	0	0	0	0	0	0	0.28	0	8.06	0	0	0	0	13.87	0	0
amx	almondex	FBtr0307281	FBgn0000077	1211	GO:0045747,GO:0007220,GO:0007498,GO:0046331,GO:0007398,GO:0001713,GO:0044214		4.48	2.71	0	0	0	0	0	0.65	0.63	0		0.95	0	0	0	1.3	0	0	0	0	0	1.73	0	0	1.79	0	0	1.44	0.11	2.74	0	0	0.09	0	0	11.77	0	4.69	0	3.8	8.12	10.78	0.55
Amy-d	Amylase distal	FBtr0086983	FBgn0000078	1606	GO:0004556,GO:0003824,GO:0005975,GO:0005509,GO:0043169		0	0	0	0	0	0	0	0	0	0		0	0	0	0	0	0.68	0	0	0	0	0	0	0	0	0	0	55.74	0	0	0	0	0	0	0	0	0	0	0	0	0	0	0
Amy-p	Amylase proximal	FBtr0087004	FBgn0000079	1595	GO:0004556,GO:0003824,GO:0005576,GO:0005975,GO:0005509,GO:0030431,GO:0043169		0	0	0	0	0	0	0	0	0	0		0.32	0	0	0	0	0.76	0	0	0	0	0	0	0	0	0	0	0	0	0	0	0	0	0	0	0	0	0	0	0	0	0	0
Amy-p	Amylase proximal	FBtr0345521	FBgn0000079	1668	GO:0004556,GO:0003824,GO:0005576,GO:0005975,GO:0005509,GO:0030431,GO:0043169		0	0	0	0	0	0	0	0	0	0		0	0	0	0	0	0	0	0	0	0	0	0	0	0.09	0	0	14.02	0	0	0	0	0	0	0	0	0	0	0	0	0	0	0
AnxB9	Annexin B9	FBtr0089517	FBgn0000083	1252	GO:0010797,GO:0048190,GO:0030011,GO:0030507,GO:0003779,GO:0005509,GO:0005938,GO:0032509,GO:0005515,GO:0005544,GO:0012505,GO:0061467		0	0.28	0	0	0	0	0	0	0	0		38.08	0	0	0	0	0.21	0	0	0	1.77	0.67	0	12.56	0	0	0.35	2.98	0	0	5.8	0	22.05	17.96	0	3.13	0	0	0	5.87	0	0	0.38
AnxB9	Annexin B9	FBtr0089518	FBgn0000083	1184	GO:0010797,GO:0048190,GO:0030011,GO:0030507,GO:0003779,GO:0005509,GO:0005938,GO:0032509,GO:0005515,GO:0005544,GO:0012505,GO:0061467		0.09	0	0	0	0	0	0	1.33	0	0		17.87	0	0	0	0	0	0	0.4	0	0	0	0.38	0	0	0	0	4.84	0	0	0	0	0.69	0	0	0	0	0	0	0	0	0	0
AnxB9	Annexin B9	FBtr0089519	FBgn0000083	1432	GO:0010797,GO:0048190,GO:0030011,GO:0030507,GO:0003779,GO:0005509,GO:0005938,GO:0032509,GO:0005515,GO:0005544,GO:0012505,GO:0061467		0	0	0	0	0	0	0	0	0	1.08		11.05	0	0	0	0	0	0	0	0	2.44	0	0	7.45	0	0	0	7.36	0	0	0	0	17.06	0	0	0.32	0	0	0	2.64	0	0	0.06
AnxB9	Annexin B9	FBtr0089520	FBgn0000083	1300	GO:0010797,GO:0048190,GO:0030011,GO:0030507,GO:0003779,GO:0005509,GO:0005938,GO:0032509,GO:0005515,GO:0005544,GO:0012505,GO:0061467		0	0	0	0	0	0	0	0	0	0		0	0	0	0	0	0	0	0	0	0	0	0	0	0	0	0	0	0	0	0	0	0	0	0	0	0	0	0	0	0	0	0
AnxB9	Annexin B9	FBtr0336797	FBgn0000083	1456	GO:0010797,GO:0048190,GO:0030011,GO:0030507,GO:0003779,GO:0005509,GO:0005938,GO:0032509,GO:0005515,GO:0005544,GO:0012505,GO:0061467		0	0	0	0	0	0	0	0	0	0		0	0	0	0	0	0	0	0	0	0	0	0	0	0	0	0	0	0	0	0	0	0	0	0	0	0	0	0	0	0	0	0
AnxB9	Annexin B9	FBtr0336798	FBgn0000083	1457	GO:0010797,GO:0048190,GO:0030011,GO:0030507,GO:0003779,GO:0005509,GO:0005938,GO:0032509,GO:0005515,GO:0005544,GO:0012505,GO:0061467		0	0	0	0	0	0	0	0	0	0		0	0	0	0	0	0	0	0	0	0	0	0	0	0	0	0	0	0	0	0	0	0	0	0	0	0	0	0	0	0	0	0
AnxB10	Annexin B10	FBtr0070025	FBgn0000084	1244	GO:0008150,GO:0005509,GO:0005544,GO:0016020,GO:0003779		3.27	1.13	1.79	0	0	0.15	0	2.52	0	0		8.86	10.38	0	0	1.87	40.84	0	0	0	0.59	0	8.65	0.79	4.57	0	0	5.46	26.31	0.43	16.96	0	0.86	0	0.67	9.46	0	30.05	12.04	25.08	17.25	15.93	0
AnxB10	Annexin B10	FBtr0301931	FBgn0000084	1247	GO:0008150,GO:0005509,GO:0005544,GO:0016020,GO:0003779		0	0	0	21.6	0	0	0	0	0	6.1		13.95	0	0	0	17.92	0	0	1.36	0	0	0.32	19.42	0	0	0	0	19.37	0.63	0	14.35	5.81	12.58	0.24	0	35.12	0	49.44	44.44	12.24	57.45	10.93	16.08
CG2650		FBtr0070504	FBgn0000092	1013	GO:0007623,GO:0005615,GO:0032504		0.11	0	0.13	0	0	0	0	0	0	0		0.2	0	0	0	0	0	0	0	0	0	7.04	0	0	0	0	0	0	0	0	0	0	0	10.54	0	0	0	0	0	0	0	0	0
Anp	Andropin	FBtr0085611	FBgn0000094	272	GO:0005576,GO:0005615,GO:0006962,GO:0009617,GO:0006965,GO:0032504		0	0	0	0	0	0	0	0	0	0		0	0	0	0	0	0	0	0	0	0	0	0	0	0	0	0	0	0	0	0	0	0	0	0	0	0	0	0	0	0	0	0
Anp	Andropin	FBtr0346141	FBgn0000094	373	GO:0005576,GO:0005615,GO:0006962,GO:0009617,GO:0006965,GO:0032504		0	0	0	0	0	0	0	0	0	0		0	0	0	0	0	0	0	0	0	0	0	0	0	0	0	0	0	0	0	0	0	0	0	0	0	0	0	0	0	0	0	0
aop	anterior open	FBtr0077850	FBgn0000097	4879	GO:0048747,GO:0007391,GO:0005737,GO:0003705,GO:0048666,GO:0007298,GO:0005654,GO:0007464,GO:0045678,GO:0045596,GO:0035157,GO:0030178,GO:0000122,GO:0045610,GO:0043565,GO:0001709,GO:0000165,GO:0048749,GO:0007517,GO:0048813,GO:0007254,GO:0035155,GO:0090175,GO:0046533,GO:0060233,GO:0008406,GO:0005515,GO:0003700,GO:0045892,GO:0046580,GO:0001751,GO:0005829,GO:0006897,GO:0045467,GO:0005634,GO:0008340,GO:…		18.69	17.29	18.75	8.85	0	7.22	6.88	9	0.71	11.76		27.97	23.58	42.58	0	29.25	13.56	0	10.48	14.23	6.81	41.03	58.3	65.63	32.81	3.92	0	46.6	0	0	30.7	21.97	22.53	69.35	40.67	45.9	14.03	0	0	0.73	2.42	0	7.51
aop	anterior open	FBtr0077851	FBgn0000097	4266	GO:0048747,GO:0007391,GO:0005737,GO:0003705,GO:0048666,GO:0007298,GO:0005654,GO:0007464,GO:0045678,GO:0045596,GO:0035157,GO:0030178,GO:0000122,GO:0045610,GO:0043565,GO:0001709,GO:0000165,GO:0048749,GO:0007517,GO:0048813,GO:0007254,GO:0035155,GO:0090175,GO:0046533,GO:0060233,GO:0008406,GO:0005515,GO:0003700,GO:0045892,GO:0046580,GO:0001751,GO:0005829,GO:0006897,GO:0045467,GO:0005634,GO:0008340,GO:…		0	0	0	0	0	0	0	0	0	0		0	0	1.15	14.99	0	0	0	0	0	0	7.54	0	0.21	0	0	52.06	0	14.69	0	0	0	0	0	0	0	24.9	0	0	0	0	0.09	0
aop	anterior open	FBtr0330658	FBgn0000097	4936	GO:0048747,GO:0007391,GO:0005737,GO:0003705,GO:0048666,GO:0007298,GO:0005654,GO:0007464,GO:0045678,GO:0045596,GO:0035157,GO:0030178,GO:0000122,GO:0045610,GO:0043565,GO:0001709,GO:0000165,GO:0048749,GO:0007517,GO:0048813,GO:0007254,GO:0035155,GO:0090175,GO:0046533,GO:0060233,GO:0008406,GO:0005515,GO:0003700,GO:0045892,GO:0046580,GO:0001751,GO:0005829,GO:0006897,GO:0045467,GO:0005634,GO:0008340,GO:…		0.69	0	0	0	21.91	0	0	0	0	0		0	0	0	0	0	0	1.05	0	0	0	0	0	0	0	0	0	0	0	0	0	0	0	0	0	0	0	0	0	0	0	0	0
aop	anterior open	FBtr0330659	FBgn0000097	4181	GO:0048747,GO:0007391,GO:0005737,GO:0003705,GO:0048666,GO:0007298,GO:0005654,GO:0007464,GO:0045678,GO:0045596,GO:0035157,GO:0030178,GO:0000122,GO:0045610,GO:0043565,GO:0001709,GO:0000165,GO:0048749,GO:0007517,GO:0048813,GO:0007254,GO:0035155,GO:0090175,GO:0046533,GO:0060233,GO:0008406,GO:0005515,GO:0003700,GO:0045892,GO:0046580,GO:0001751,GO:0005829,GO:0006897,GO:0045467,GO:0005634,GO:0008340,GO:…		0	0.2	0	0.33	0	21.36	0	0	0	0		0.08	0	0	0	0	0	27.99	0	0	0	0	0	0.58	0	0	0	0.79	0	0	0	0	0.26	0	0	0.53	0	0	0	0	0	0	0
aop	anterior open	FBtr0330660	FBgn0000097	3936	GO:0048747,GO:0007391,GO:0005737,GO:0003705,GO:0048666,GO:0007298,GO:0005654,GO:0007464,GO:0045678,GO:0045596,GO:0035157,GO:0030178,GO:0000122,GO:0045610,GO:0043565,GO:0001709,GO:0000165,GO:0048749,GO:0007517,GO:0048813,GO:0007254,GO:0035155,GO:0090175,GO:0046533,GO:0060233,GO:0008406,GO:0005515,GO:0003700,GO:0045892,GO:0046580,GO:0001751,GO:0005829,GO:0006897,GO:0045467,GO:0005634,GO:0008340,GO:…		0	0	0	0	0.8	0	11.39	19.51	7.09	0		0	0	0	322.65	0	0.64	0	0	8.73	7.06	0	0	0	23.03	0	63.52	0	4.52	2.66	0	2.17	0	0	131.56	0	0	0.44	2.14	0	1.64	0	0
RpLP0	Ribosomal protein LP0	FBtr0078481	FBgn0000100	1211	GO:0003735,GO:0002181,GO:0022626,GO:0005840,GO:0042254,GO:0022625		50.31	65.72	40.11	7.36	6.66	8.24	77.7	69.29	62.12	85.6		13.43	11.86	21.32	0	41.4	31.78	36.97	12.38	0.69	32.49	0	0	8.14	0	0.24	0.18	11.14	48.03	58.14	90.45	49.92	0	7.34	70.65	56.67	5.21	244.7	166.31	221.94	316.26	173.58	17.83
RpLP0	Ribosomal protein LP0	FBtr0334113	FBgn0000100	1328	GO:0003735,GO:0002181,GO:0022626,GO:0005840,GO:0042254,GO:0022625		28.65	30.25	22.73	0	0	93.48	1.77	40.74	29.96	24.17		34.62	17.87	0	0	18.97	56.45	0	0	0	0	40.94	9.92	0	6.84	0	0	0	31.1	12.89	25.07	7.49	64.87	0.72	0	0.03	0	35.13	26.8	67.55	86.26	27.2	0
Appl	beta amyloid protein precursor-like	FBtr0070109	FBgn0000108	5422	GO:0008201,GO:0007422,GO:0048812,GO:0005576,GO:0005886,GO:0016319,GO:0005515,GO:1901215,GO:0007616,GO:0051602,GO:0050808,GO:0007614,GO:0007611,GO:0048678,GO:0046914		0	0	0	0	0	0	0	0	0	0		0	0	0	0	0	0	0	0	0	0	0	0	0	0	0	0	0	0	0	0	0	0	0	0	0	0	0	0	0	0	0	0
Appl	beta amyloid protein precursor-like	FBtr0307291	FBgn0000108	6331	GO:0008201,GO:0007422,GO:0048812,GO:0005576,GO:0005886,GO:0016319,GO:0005515,GO:1901215,GO:0007616,GO:0051602,GO:0050808,GO:0007614,GO:0007611,GO:0048678,GO:0046914		288.3	391.92	399.69	510.39	304.46	508.07	652.99	615.96	259.69	323.54		66.85	833.47	2575.86	135.95	402.66	440.79	890.05	534.09	1374.38	897.92	380.08	914.88	506.51	827.86	2804.24	1395.78	416.84	613.45	636.13	327.79	537.8	274.58	334.65	409.78	681.63	1346.71	11	0.55	26.93	21.33	9.66	412.49
Appl	beta amyloid protein precursor-like	FBtr0307292	FBgn0000108	5251	GO:0008201,GO:0007422,GO:0048812,GO:0005576,GO:0005886,GO:0016319,GO:0005515,GO:1901215,GO:0007616,GO:0051602,GO:0050808,GO:0007614,GO:0007611,GO:0048678,GO:0046914		260.58	340.66	588.37	97.68	523.63	0	393.76	739.77	38.84	454.36		80.64	2228.82	3373.27	4979.99	204.34	9.21	3722.99	2039.4	4343.74	2292.55	1290.51	3119.04	1599.27	1235.43	6255.57	2628.49	812.41	133.73	1171.81	157	517.32	706.55	51.81	2683.06	82.17	4684.56	0	2.27	9.87	5.15	0	1109.87
Appl	beta amyloid protein precursor-like	FBtr0307293	FBgn0000108	5425	GO:0008201,GO:0007422,GO:0048812,GO:0005576,GO:0005886,GO:0016319,GO:0005515,GO:1901215,GO:0007616,GO:0051602,GO:0050808,GO:0007614,GO:0007611,GO:0048678,GO:0046914		356.46	410	296.78	459.06	284.94	252.47	430.09	623.82	380.21	491.27		63.61	4.18	184.57	381.92	721.32	731.86	20.74	275.77	2.02	0.47	310.99	176.75	14.06	732.55	10.97	807.82	212.68	1133.98	16.69	721.08	651.54	130.71	374.47	1.56	436.42	0	0	5.73	3.05	20.65	1.36	0.24
Appl	beta amyloid protein precursor-like	FBtr0307294	FBgn0000108	6324	GO:0008201,GO:0007422,GO:0048812,GO:0005576,GO:0005886,GO:0016319,GO:0005515,GO:1901215,GO:0007616,GO:0051602,GO:0050808,GO:0007614,GO:0007611,GO:0048678,GO:0046914		118.27	139.6	157.32	288.7	230.81	379.61	125.09	101.63	105.32	265.52		45.34	103.33	0	1238.75	19.19	53.1	219.3	187.78	358.79	341.59	775.07	850.29	92.29	1311.71	299.27	26.77	463.73	16.74	0	276.93	37.87	103.98	744.28	462.48	475.84	399.91	37.73	28.15	18.76	14.96	31.28	177.27
Appl	beta amyloid protein precursor-like	FBtr0307295	FBgn0000108	5425	GO:0008201,GO:0007422,GO:0048812,GO:0005576,GO:0005886,GO:0016319,GO:0005515,GO:1901215,GO:0007616,GO:0051602,GO:0050808,GO:0007614,GO:0007611,GO:0048678,GO:0046914		442.11	357.31	397.09	52.65	336	61.88	108.61	587.16	395.66	494.38		57.2	3.94	0	12.82	433.29	851.13	110.79	97.37	283.61	0.47	346.19	116.09	1.28	964.1	114.47	10.31	264.31	262.08	477.53	479.67	190.85	146.95	308.21	1.65	213.97	18.71	1.74	6.75	0	0	5.4	0.24
Aprt	Adenine phosphoribosyltransferase	FBtr0089420	FBgn0000109	797	GO:0009116,GO:0005737,GO:0003999,GO:0006168		1.29	6.82	0.7	176.23	0	0.88	0	2.36	0	0.1		1.81	0	0	0	0	0.18	0	0	0	0	0	7.21	0	18.02	0	0	7.34	1.29	0	28.81	7	82.03	0	0	16.05	0	0	17.34	0	0	0.61	0
Aprt	Adenine phosphoribosyltransferase	FBtr0346440	FBgn0000109	894	GO:0009116,GO:0005737,GO:0003999,GO:0006168		0.97	2.1	4.83	0	0	3.51	0	0	0	2.4		0.61	0	0	0	0	0	0	0	0	0	7.07	2.83	17.58	13.41	0	0.52	0	0	0	0	1.02	0	0	4.91	7.26	0	0	0	2.63	2.59	0	0
Aprt	Adenine phosphoribosyltransferase	FBtr0346441	FBgn0000109	924	GO:0009116,GO:0005737,GO:0003999,GO:0006168		0	0	0	0	0	0	0	0	0	0		0	0	0	0	0	0	0	0	0	0	0	0	0	0	0	0	6.87	0	0	0	0	0	0	0	0	0	0	0	2.07	4.2	0	0
bru1	bruno 1	FBtr0080344	FBgn0000114	3436	GO:0000381,GO:0005737,GO:0031536,GO:0031965,GO:0003729,GO:0007286,GO:0048477,GO:0014881,GO:0045214,GO:0036099,GO:0002121,GO:0017148,GO:0005515,GO:0016604,GO:0007319,GO:0043186,GO:2000738,GO:0007281,GO:0003723,GO:0003730,GO:0005634		21.91	15.09	1.93	0.73	0	0.39	6.91	0	12.51	20.75		7.25	5.76	6.36	3.84	0	15.91	0.12	0	0.04	103	0	0	0	0	45.96	14.91	30.14	50.17	80.64	57.49	56.71	35.96	3.4	0	3.94	0	0	0	0	0	0	0
bru1	bruno 1	FBtr0080345	FBgn0000114	2651	GO:0000381,GO:0005737,GO:0031536,GO:0031965,GO:0003729,GO:0007286,GO:0048477,GO:0014881,GO:0045214,GO:0036099,GO:0002121,GO:0017148,GO:0005515,GO:0016604,GO:0007319,GO:0043186,GO:2000738,GO:0007281,GO:0003723,GO:0003730,GO:0005634		0	0	0	0	0	0	0	0	0	0		0	0	0	0	0	0	0	0	0	0	0	0	0	0	0	0	0	0	0	0	0	0	0	0	0	0	0	0	0	0	0	0
bru1	bruno 1	FBtr0080347	FBgn0000114	2385	GO:0000381,GO:0005737,GO:0031536,GO:0031965,GO:0003729,GO:0007286,GO:0048477,GO:0014881,GO:0045214,GO:0036099,GO:0002121,GO:0017148,GO:0005515,GO:0016604,GO:0007319,GO:0043186,GO:2000738,GO:0007281,GO:0003723,GO:0003730,GO:0005634		13.98	9.59	12.63	1.63	0.04	0.15	0	5.03	3.71	17.48		1.63	0.06	9.48	4.11	47.87	43.26	0	0.19	0	2.41	5.55	0.99	2.4	65.55	7.29	5.99	15.27	32.61	1.18	40.73	36.09	4.57	1.99	1.49	3.05	4.4	0	0.57	0	0.16	0.16	3.15
bru1	bruno 1	FBtr0300567	FBgn0000114	2302	GO:0000381,GO:0005737,GO:0031536,GO:0031965,GO:0003729,GO:0007286,GO:0048477,GO:0014881,GO:0045214,GO:0036099,GO:0002121,GO:0017148,GO:0005515,GO:0016604,GO:0007319,GO:0043186,GO:2000738,GO:0007281,GO:0003723,GO:0003730,GO:0005634		0	0	0	0	0	0	0	0	0	0		0	0.75	4.69	0	0	0	0	0	0	0	0	0	0	0	0	0	0	0	0	0	0	0	0	0	0	0	0	0	0	1.66	0	0
bru1	bruno 1	FBtr0331644	FBgn0000114	3342	GO:0000381,GO:0005737,GO:0031536,GO:0031965,GO:0003729,GO:0007286,GO:0048477,GO:0014881,GO:0045214,GO:0036099,GO:0002121,GO:0017148,GO:0005515,GO:0016604,GO:0007319,GO:0043186,GO:2000738,GO:0007281,GO:0003723,GO:0003730,GO:0005634		9.11	13.28	19.88	0	0	0	1.89	1.3	4.67	5.39		1.23	0	48.92	0	27.58	22.15	0	0	0	1.99	30.1	0	0.52	9.94	4.01	13.75	25.27	18.9	35.28	27.7	10.51	4.71	21.09	0	21.64	16.11	0	0	0	0	0	38.52
bru1	bruno 1	FBtr0331645	FBgn0000114	4147	GO:0000381,GO:0005737,GO:0031536,GO:0031965,GO:0003729,GO:0007286,GO:0048477,GO:0014881,GO:0045214,GO:0036099,GO:0002121,GO:0017148,GO:0005515,GO:0016604,GO:0007319,GO:0043186,GO:2000738,GO:0007281,GO:0003723,GO:0003730,GO:0005634		26.9	47.42	64.59	1.61	5.56	0.46	7.04	55.36	45.2	32.24		3.51	22.96	58.68	214.36	103.25	103.79	0	0.81	0	41.17	29.25	0.12	7.27	145.02	50.93	65.13	68.15	90.49	89.72	11.24	45.74	9.12	0.78	8.99	11.92	37.95	0	0	0	0	0	19.84
bru1	bruno 1	FBtr0331646	FBgn0000114	3381	GO:0000381,GO:0005737,GO:0031536,GO:0031965,GO:0003729,GO:0007286,GO:0048477,GO:0014881,GO:0045214,GO:0036099,GO:0002121,GO:0017148,GO:0005515,GO:0016604,GO:0007319,GO:0043186,GO:2000738,GO:0007281,GO:0003723,GO:0003730,GO:0005634		0	0	0	0	0.06	0	0	0	0	0		0	0	0	0	0	0	0	0	0	0	0.07	0	0	0	0	0	0	0	0	0	0	0	0	0	0	0	0	0	0.09	0	0.11	0
bru1	bruno 1	FBtr0331647	FBgn0000114	3019	GO:0000381,GO:0005737,GO:0031536,GO:0031965,GO:0003729,GO:0007286,GO:0048477,GO:0014881,GO:0045214,GO:0036099,GO:0002121,GO:0017148,GO:0005515,GO:0016604,GO:0007319,GO:0043186,GO:2000738,GO:0007281,GO:0003723,GO:0003730,GO:0005634		8.8	4.75	0.73	26.68	0	0	5.36	5.61	0	0		3.78	20.23	0	25.57	0	0	0.05	0.06	0	18.15	1.58	0.07	16.86	34.72	49.53	16.63	28.46	4.28	0	0	0	21.79	2.36	28.85	23.54	135.63	0	0	0	0	0.12	24.24
bru1	bruno 1	FBtr0331648	FBgn0000114	2431	GO:0000381,GO:0005737,GO:0031536,GO:0031965,GO:0003729,GO:0007286,GO:0048477,GO:0014881,GO:0045214,GO:0036099,GO:0002121,GO:0017148,GO:0005515,GO:0016604,GO:0007319,GO:0043186,GO:2000738,GO:0007281,GO:0003723,GO:0003730,GO:0005634		0	0	0	0	0	0	0	0	0	0		0	0	0	0	0	0	0	0	0	0	0	0	0	0.92	0	0	0	0	0	0	0	0	0	0	0	0	0	0	0	0	0.15	0
bru1	bruno 1	FBtr0331998	FBgn0000114	3510	GO:0000381,GO:0005737,GO:0031536,GO:0031965,GO:0003729,GO:0007286,GO:0048477,GO:0014881,GO:0045214,GO:0036099,GO:0002121,GO:0017148,GO:0005515,GO:0016604,GO:0007319,GO:0043186,GO:2000738,GO:0007281,GO:0003723,GO:0003730,GO:0005634		0.32	0	0	0	0	0	0	0	0	0		0	0	0	0	0	0	0	0	0	0	0.27	0.67	0	0	0	0	0	0	0	0	0	0.05	0	0	0	0	0	0	0	0	0	0
Arl1	ADP ribosylation factor-like 1	FBtr0075517	FBgn0000115	863	GO:0007269,GO:0033363,GO:0060628,GO:0003924,GO:0033227,GO:0035220,GO:0007264,GO:0007030,GO:1903292,GO:0007431,GO:0005515,GO:0005525,GO:0034067,GO:0070861,GO:0030334,GO:0090158,GO:0048488,GO:0005802,GO:0019904,GO:0005794		14.76	12.99	9.46	55.63	0	0	8.39	15.27	15.63	13.14		10.87	18.26	14.41	1.47	11.56	1.78	27.41	9.88	47.92	35.84	28.36	26.54	2.41	19.52	0.9	0	9.45	12.51	0	0	0.55	3.03	19.31	0	27.49	12.06	24.38	20.94	48.45	55.21	26.62	10.78
Argk	Arginine kinase	FBtr0076543	FBgn0000116	2415	GO:0005737,GO:0005576,GO:0005886,GO:0016310,GO:0005829,GO:0004054		0.06	0	0	0	0	0	13.35	0.05	0	0		6.54	0	0	0	0	0	0	0	0	0	3.9	4.09	2.55	3.52	0.64	0	5.29	8.78	3.92	35.52	1.72	0	10.36	6.6	1.88	0	0	0	0	0	0	0
Argk	Arginine kinase	FBtr0076544	FBgn0000116	2246	GO:0005737,GO:0005576,GO:0005886,GO:0016310,GO:0005829,GO:0004054		6.85	9.59	8.56	0	0	0	92.08	2.37	47.07	2.5		1.45	0	0	0	2.1	0.34	1.93	1	0	0	0	6.31	0.39	42.4	0	0.27	2.69	78.78	0	0	0.01	1.95	10.4	0	1.28	0	0	0	0	0	0	0
Argk	Arginine kinase	FBtr0076545	FBgn0000116	1519	GO:0005737,GO:0005576,GO:0005886,GO:0016310,GO:0005829,GO:0004054		16.28	17.99	45.63	0	0	19.14	0	77.04	23.24	61.21		17.05	0	33.55	0	4.69	212.26	93.75	0	0	5.68	2.36	4.51	0	0	0	0	21.11	61.28	6.74	5.45	58.65	0.37	0.43	0.23	3.55	0	244.24	377.38	184.4	1057.19	208.87	0
Argk	Arginine kinase	FBtr0076546	FBgn0000116	2320	GO:0005737,GO:0005576,GO:0005886,GO:0016310,GO:0005829,GO:0004054		24.74	48.65	21.87	24.17	0.76	1.52	12.34	27.04	12.59	22.27		19.11	24.95	17.81	55.47	76.26	116.23	12.86	26.02	14.7	48.51	65.25	34.42	95.4	42.36	20.98	71.66	74.51	66.17	65.84	51.3	26.57	28.25	80.11	17.5	83.71	81.16	2.86	0.4	0	6.43	2.66	0
Argk	Arginine kinase	FBtr0112791	FBgn0000116	1854	GO:0005737,GO:0005576,GO:0005886,GO:0016310,GO:0005829,GO:0004054		28.94	44.78	27.62	67.77	8.2	70.31	0	52.19	28.78	41.09		21.98	26.16	5.65	15.79	137.41	5.14	0	18.54	35.11	10.95	25.98	20.66	26.14	5.82	2.1	4.15	21.59	10.64	25.04	106.66	4.02	34.4	11.49	223.36	68.27	6.75	38.94	51.33	41.24	168.65	20.67	8.29
Argk	Arginine kinase	FBtr0331550	FBgn0000116	2110	GO:0005737,GO:0005576,GO:0005886,GO:0016310,GO:0005829,GO:0004054		0	0	0	0	0	0	0	0	0	0		0	0	111.83	0	2.03	0	0	0	0	0	0	0	0	10.85	2.99	0	0	0	67.16	0	0	0	1.97	46.35	2.02	0	0	0	0	0	0	0
Argk	Arginine kinase	FBtr0345030	FBgn0000116	1576	GO:0005737,GO:0005576,GO:0005886,GO:0016310,GO:0005829,GO:0004054		127.3	124.55	171.97	269.42	215.54	289.02	249.88	76.22	40.39	79.17		297.27	44.07	12.75	0	134.57	47.72	69.33	11.09	10.75	0.36	56.83	26.8	34.58	84.43	3.01	2.08	87.43	246.89	3	35.15	114.47	150.22	115.6	0	81.91	0	647.18	789.23	732.32	731.78	835.89	616.12
arm	armadillo	FBtr0089988	FBgn0000117	3116	GO:0005914,GO:0048526,GO:0019903,GO:0071896,GO:0003136,GO:0007391,GO:0005737,GO:0004871,GO:0048754,GO:0016337,GO:0007507,GO:0008092,GO:0007155,GO:0045944,GO:0016055,GO:0007399,GO:0060429,GO:0045186,GO:0048477,GO:0045893,GO:0046530,GO:0007370,GO:0007163,GO:0045294,GO:0035293,GO:0005886,GO:0001709,GO:0000902,GO:0030424,GO:0005915,GO:0014019,GO:0016342,GO:0060914,GO:0035017,GO:0060232,GO:0008134,GO:…		0	0	0	0	100.02	97.5	34.69	0	0	0		0	152.75	0	0	0	9.01	0	0	0	60.63	0	0	0	0.01	0	0	0	0	2.33	0	0	0	0	120.15	0	0	0	0	0.69	0	0	0.06
arm	armadillo	FBtr0089989	FBgn0000117	3220	GO:0005914,GO:0048526,GO:0019903,GO:0071896,GO:0003136,GO:0007391,GO:0005737,GO:0004871,GO:0048754,GO:0016337,GO:0007507,GO:0008092,GO:0007155,GO:0045944,GO:0016055,GO:0007399,GO:0060429,GO:0045186,GO:0048477,GO:0045893,GO:0046530,GO:0007370,GO:0007163,GO:0045294,GO:0035293,GO:0005886,GO:0001709,GO:0000902,GO:0030424,GO:0005915,GO:0014019,GO:0016342,GO:0060914,GO:0035017,GO:0060232,GO:0008134,GO:…		0	0	0	0	0	0	0	0	0	0		0	0	0	0	0	0	0	0	0	0	0	0	0	0	0	0	0	0	0	0	0	0	0	0	0	1.46	0	0	0	0	0	0
arm	armadillo	FBtr0089990	FBgn0000117	3123	GO:0005914,GO:0048526,GO:0019903,GO:0071896,GO:0003136,GO:0007391,GO:0005737,GO:0004871,GO:0048754,GO:0016337,GO:0007507,GO:0008092,GO:0007155,GO:0045944,GO:0016055,GO:0007399,GO:0060429,GO:0045186,GO:0048477,GO:0045893,GO:0046530,GO:0007370,GO:0007163,GO:0045294,GO:0035293,GO:0005886,GO:0001709,GO:0000902,GO:0030424,GO:0005915,GO:0014019,GO:0016342,GO:0060914,GO:0035017,GO:0060232,GO:0008134,GO:…		95.77	82.15	88.25	89.57	0	0	44.9	102.25	108.92	73.25		28.73	7.97	0	0	143.92	184.86	37.58	3.16	80.87	0	20.67	105.11	45.77	129.66	123.79	103.71	31.83	60.21	100.93	88.43	101.66	26.98	46.69	0	131.13	0	50.69	60.57	58.4	95.22	49.13	78.22
arm	armadillo	FBtr0089991	FBgn0000117	3120	GO:0005914,GO:0048526,GO:0019903,GO:0071896,GO:0003136,GO:0007391,GO:0005737,GO:0004871,GO:0048754,GO:0016337,GO:0007507,GO:0008092,GO:0007155,GO:0045944,GO:0016055,GO:0007399,GO:0060429,GO:0045186,GO:0048477,GO:0045893,GO:0046530,GO:0007370,GO:0007163,GO:0045294,GO:0035293,GO:0005886,GO:0001709,GO:0000902,GO:0030424,GO:0005915,GO:0014019,GO:0016342,GO:0060914,GO:0035017,GO:0060232,GO:0008134,GO:…		15.28	24.05	32.25	0	0.01	0.02	26.25	4.6	1.58	13.14		16.31	0.01	0	0	28.41	5.12	5.46	48.53	0	0	5.68	2.02	0	15.83	10.63	0.84	0	13.33	0	33.3	1.98	11.87	51.58	0	1.43	0.39	0	0	0	0	0	0
arm	armadillo	FBtr0089992	FBgn0000117	3127	GO:0005914,GO:0048526,GO:0019903,GO:0071896,GO:0003136,GO:0007391,GO:0005737,GO:0004871,GO:0048754,GO:0016337,GO:0007507,GO:0008092,GO:0007155,GO:0045944,GO:0016055,GO:0007399,GO:0060429,GO:0045186,GO:0048477,GO:0045893,GO:0046530,GO:0007370,GO:0007163,GO:0045294,GO:0035293,GO:0005886,GO:0001709,GO:0000902,GO:0030424,GO:0005915,GO:0014019,GO:0016342,GO:0060914,GO:0035017,GO:0060232,GO:0008134,GO:…		5.66	5.78	3.79	0	0	0	0	9.43	1.42	16.42		12.55	0	57.88	63.57	0	0	0	1.51	0	0	61.05	0	0	25.59	0	257.43	13	2.41	0	2.52	1.85	40.34	0	0	0	0	0	0	0	4.9	0	0
arm	armadillo	FBtr0332583	FBgn0000117	3211	GO:0005914,GO:0048526,GO:0019903,GO:0071896,GO:0003136,GO:0007391,GO:0005737,GO:0004871,GO:0048754,GO:0016337,GO:0007507,GO:0008092,GO:0007155,GO:0045944,GO:0016055,GO:0007399,GO:0060429,GO:0045186,GO:0048477,GO:0045893,GO:0046530,GO:0007370,GO:0007163,GO:0045294,GO:0035293,GO:0005886,GO:0001709,GO:0000902,GO:0030424,GO:0005915,GO:0014019,GO:0016342,GO:0060914,GO:0035017,GO:0060232,GO:0008134,GO:…		0.32	2.68	0	0.88	0	0	0	0	0.63	3.54		0.9	0	0	0	6.34	0	0	0	0	0	23.6	0	10.24	0	0	0	6.15	2.53	0	0	0	0	0	0	14.92	0.33	0	0	0	0	0	0
arr	arrow	FBtr0087702	FBgn0000119	6024	GO:0017147,GO:0042813,GO:0005769,GO:0060070,GO:0016055,GO:0007399,GO:0005770,GO:0005886,GO:0005041,GO:0048076,GO:0005515,GO:0007616,GO:0001745		11.41	11.73	10.15	12.27	5.12	9.03	21.37	22.23	17.98	27.07		2.36	2.16	121.99	16.15	19.73	35.09	17.95	1.49	2.04	1.42	7.13	8.16	8.88	15.56	2.47	18.25	6.96	11.92	42.44	2.45	18.89	8.04	8.91	1.24	21.9	27.16	0.98	2.36	0.39	0.22	0	4.48
Arr1	Arrestin 1	FBtr0081030	FBgn0000120	1435	GO:0005737,GO:0045494,GO:0016060,GO:0016028,GO:0016059,GO:0007608,GO:0002046,GO:0002032,GO:0006897		0	0	0	0	0	0	0	0	0	0		0.48	0	0	0	0	0	0	0	0	0	0	0	0	0	0	0	0	0	0	0	0	0.75	0	0	0	0	0	0	0	0	0	0
Arr1	Arrestin 1	FBtr0307350	FBgn0000120	2327	GO:0005737,GO:0045494,GO:0016060,GO:0016028,GO:0016059,GO:0007608,GO:0002046,GO:0002032,GO:0006897		0	0	0	0	0	0	0	0	0	0		0.22	0	0	0	0	0	0	0	0	0	0	0	0.33	0.79	0	0	0.81	0	0	0	0	1.47	0.87	0	2.57	0.1	0	0	0	0	0	0
Arr1	Arrestin 1	FBtr0340229	FBgn0000120	1356	GO:0005737,GO:0045494,GO:0016060,GO:0016028,GO:0016059,GO:0007608,GO:0002046,GO:0002032,GO:0006897		0	0	0	0	0	0	0	0	0	0		2.74	0	0	0	0	0	0	0	0	0	0	51.79	0	0	0	0	0	0	0	0	0	12.24	0.61	0	0	0	0	0	0	0	0	0
Arr2	Arrestin 2	FBtr0076599	FBgn0000121	1547	GO:0005737,GO:0045494,GO:0016060,GO:0016028,GO:0016059,GO:0016062,GO:0007608,GO:0005515,GO:0002046,GO:0016029,GO:0002032,GO:0007605		0	0	0	0	0	0	0	0	0	0		8.76	0	0	0	0	0	0	0	0	0	0	0	11.26	0	0	0	0	0	0	0	0	28.85	0	0	0.36	0	0	0	0	0	0	3.14
ase	asense	FBtr0070075	FBgn0000137	2430	GO:0008407,GO:0007400,GO:0000977,GO:0045944,GO:0007422,GO:0007399,GO:0003677,GO:0061331,GO:0007417,GO:0042803,GO:0045839,GO:0022416,GO:0061382,GO:0003700,GO:0046982,GO:0090575,GO:0005634,GO:0050767		0	0.22	0	0	0	0	1.06	0	0	0		0.1	0	0.08	0	0.16	0	0	0.07	0.43	0	0	0	1.36	0.41	0	0	0	0	0	0	0.77	0.04	0.38	0	13	0	0	0.7	0	0	0	1.53
ash2	absent, small, or homeotic discs 2	FBtr0084659	FBgn0000139	1413	GO:0005703,GO:0007444,GO:0007474,GO:0007420,GO:0035209,GO:0048096,GO:0033128,GO:0003677,GO:0044665,GO:0051568,GO:0035075,GO:0051571,GO:0042800,GO:0044666,GO:0044212,GO:0048813,GO:0005700,GO:0005515,GO:0010628,GO:0007476,GO:0048188,GO:0010629,GO:0006357,GO:0005634,GO:0019899,GO:0002168		0.66	2.79	0	0.63	0	1.13	0	7.41	0.15	0		2	0	0	0	0	0	0	0	0	0	0	0	0	0	0	0	0	9.22	0	0.74	0	0	0	0	0.97	0	0	0	0	0	0	0
ash2	absent, small, or homeotic discs 2	FBtr0084660	FBgn0000139	1949	GO:0005703,GO:0007444,GO:0007474,GO:0007420,GO:0035209,GO:0048096,GO:0033128,GO:0003677,GO:0044665,GO:0051568,GO:0035075,GO:0051571,GO:0042800,GO:0044666,GO:0044212,GO:0048813,GO:0005700,GO:0005515,GO:0010628,GO:0007476,GO:0048188,GO:0010629,GO:0006357,GO:0005634,GO:0019899,GO:0002168		3.62	3.4	0	0	1.21	0	2.04	0	2.29	3.55		0.08	0	0	0	0	0	5.47	0	0	0	0	0	0	0	18.77	0	34.19	0	0.17	0	0	0	0	0	0	0	0	0	0	0	0	0
ash2	absent, small, or homeotic discs 2	FBtr0306171	FBgn0000139	1271	GO:0005703,GO:0007444,GO:0007474,GO:0007420,GO:0035209,GO:0048096,GO:0033128,GO:0003677,GO:0044665,GO:0051568,GO:0035075,GO:0051571,GO:0042800,GO:0044666,GO:0044212,GO:0048813,GO:0005700,GO:0005515,GO:0010628,GO:0007476,GO:0048188,GO:0010629,GO:0006357,GO:0005634,GO:0019899,GO:0002168		12.21	6.41	6.57	2.44	38.87	2.83	0	0	0	10.45		9.7	1.83	0	0	27.78	0	0	0	0	5.57	1.09	0	9.9	13.41	0	1.72	0	0	11.2	3.83	22.54	32.85	5.39	0.49	0	0	0	5.96	16.81	2.79	9.49	17.36
asp	abnormal spindle	FBtr0084692	FBgn0000140	6338	GO:0000132,GO:0030037,GO:0048132,GO:0007097,GO:0030723,GO:0034332,GO:0007282,GO:0030954,GO:0000922,GO:0032027,GO:0048477,GO:0005875,GO:0005516,GO:0000226,GO:0048854,GO:0051383,GO:0007051,GO:0005815,GO:0008017,GO:0007052,GO:0051295,GO:0042335,GO:0051642,GO:0007017,GO:0005813,GO:0030706		0.48	0.02	2.53	0	0	0	0	0.4	0	0		0.01	0	0	0	2.16	0	0	0	0	0	0	0	0	2.49	0	0	0.94	0	0.02	0	0	0	0	0	0	0	0	0	0	0	0	2.82
aub	aubergine	FBtr0080165	FBgn0000146	2825	GO:0035282,GO:0005737,GO:0010529,GO:0030423,GO:0050829,GO:0048477,GO:0034584,GO:0007279,GO:0031047,GO:0046012,GO:0071013,GO:0007317,GO:0046843,GO:0046594,GO:0071011,GO:0043186,GO:0006342,GO:0000398,GO:0001556,GO:0003723,GO:0045089,GO:0007076,GO:0046011,GO:0007318,GO:0016246,GO:0006446,GO:0030717,GO:0060213		0	0	0.08	0	0	0	0.08	0	0	0		0	0	0	0	0	0	0	0	0	0	0	0	0	0	0	0	0	0	0	0	0	0	2.84	0	0	0	0	0	0	0	0	0
aub	aubergine	FBtr0112793	FBgn0000146	2808	GO:0035282,GO:0005737,GO:0010529,GO:0030423,GO:0050829,GO:0048477,GO:0034584,GO:0007279,GO:0031047,GO:0046012,GO:0071013,GO:0007317,GO:0046843,GO:0046594,GO:0071011,GO:0043186,GO:0006342,GO:0000398,GO:0001556,GO:0003723,GO:0045089,GO:0007076,GO:0046011,GO:0007318,GO:0016246,GO:0006446,GO:0030717,GO:0060213		0.07	0.19	0	0	0	0	0	0.21	4.91	0		0.17	0	0	0	0	0	0	0	10.33	0	0.67	0	0.05	0	0.05	0	0.52	0	0	0	0	0	0	0.07	0.07	0	0	0	0.33	0.49	0	0.06
aurA	aurora A	FBtr0082483	FBgn0000147	1577	GO:0051233,GO:0007098,GO:0005737,GO:0004672,GO:0008105,GO:0045167,GO:0098725,GO:0018105,GO:0005524,GO:0000780,GO:0051294,GO:0004712,GO:0007279,GO:0004674,GO:0005515,GO:0051299,GO:0032465,GO:0006468,GO:0007052,GO:0031616,GO:0035174,GO:0032133,GO:0007100,GO:0007017,GO:0005876,GO:0005813,GO:1903827,GO:0050767		4.62	12.01	10.4	0	0	0	0	2.6	0.07	7.53		4.12	0	0	0	1.4	0	5.97	4.4	0	0	4.48	6.13	1.31	58.46	0	112.61	9.41	1.68	0	0	0	5.86	5.67	0	10.74	0	7.03	9.95	3.84	11.24	6.16	0.9
awd	abnormal wing discs	FBtr0339146	FBgn0000150	634	GO:0006165,GO:0009117,GO:0005880,GO:0046777,GO:0034332,GO:0018105,GO:0006183,GO:0000287,GO:0000278,GO:0005524,GO:0004550,GO:0005886,GO:0006228,GO:0005874,GO:0006241,GO:0016301,GO:0006468,GO:0008017,GO:0005525,GO:0007427,GO:0035152,GO:0007017,GO:0007424,GO:0016334		1.31	0.89	1.6	36.96	0	0	0	10.92	0	4.07		9.42	0	149.9	0	0	48.29	0	0	0	0	0	0	0	0	0	0	0	0	0	5.6	0	0	0	0	0	0	842.16	980.24	1015.94	1135.15	1095.54	0
awd	abnormal wing discs	FBtr0346150	FBgn0000150	727	GO:0006165,GO:0009117,GO:0005880,GO:0046777,GO:0034332,GO:0018105,GO:0006183,GO:0000287,GO:0000278,GO:0005524,GO:0004550,GO:0005886,GO:0006228,GO:0005874,GO:0006241,GO:0016301,GO:0006468,GO:0008017,GO:0005525,GO:0007427,GO:0035152,GO:0007017,GO:0007424,GO:0016334		2.02	1.1	2.37	1.93	0	12.3	0	1.47	0.63	0		7.56	0	38.24	0	0	1.2	0	0	0	0	1.64	0	0	63.78	0	0	2	0	0	0	0	1.95	0	0	11.18	0	164.98	68.6	2.64	101.24	122.87	4.49
awd	abnormal wing discs	FBtr0346611	FBgn0000150	578	GO:0006165,GO:0009117,GO:0005880,GO:0046777,GO:0034332,GO:0018105,GO:0006183,GO:0000287,GO:0000278,GO:0005524,GO:0004550,GO:0005886,GO:0006228,GO:0005874,GO:0006241,GO:0016301,GO:0006468,GO:0008017,GO:0005525,GO:0007427,GO:0035152,GO:0007017,GO:0007424,GO:0016334		19.86	7.9	10.79	112.2	0	78.34	44.48	16.95	26.35	30.95		32.22	1.78	35.56	0	28.93	78.11	0.3	5.2	1.7	39.49	85.79	1.95	0.16	0	0	0	52.88	17.26	2.42	33.23	5.95	21.53	16.59	0	2.97	0	207.11	167.85	0	115.39	303.31	155.49
Axs	Abnormal X segregation	FBtr0074372	FBgn0000152	2575	GO:0005640,GO:0016321,GO:0000212,GO:0005783,GO:0005938,GO:0032837,GO:0005819,GO:0016021		1.32	0.55	0.37	0	0.04	0.81	0	0.99	0.08	0.09		0.7	0	0	0	1.01	0	0	3.16	0	0	0.84	0	0.1	9.56	5.5	0.87	0.71	1.86	0.24	0	0.4	7.28	10.41	8.15	1.56	0.09	0	0	0	0	0	0
b	black	FBtr0080542	FBgn0000153	2026	GO:0007632,GO:0006212,GO:0004068,GO:0048066,GO:0030170,GO:0019483,GO:0019752		0.03	0	0.63	0	0	0.04	0	0.11	0	0		0	0	0	0	0	0	0	0	0	0	2.83	0	0	0	0	0	0	0	0	0.97	0	0	0	0	0	0.06	0	0	0	0	0	0
b	black	FBtr0309960	FBgn0000153	2135	GO:0007632,GO:0006212,GO:0004068,GO:0048066,GO:0030170,GO:0019483,GO:0019752		0	0.67	0	0	0	0	0.42	0	0	0.35		0.46	0	0	0	0	0	0	0	0	0	3.06	0	1.16	0	0	0	0	0	0	0	0.1	5.16	0.36	0	0	0	0	0	0	0	0	0.04
b	black	FBtr0342712	FBgn0000153	2026	GO:0007632,GO:0006212,GO:0004068,GO:0048066,GO:0030170,GO:0019483,GO:0019752		0.03	0	0.63	0	0	0.04	0	0.11	0	0		0	0	0	0	0	0	0	0	0	0	2.83	0	0	0	0	0	0	0	0	0.97	0	0	0	0	0	0.06	0	0	0	0	0	0
Dll	Distal-less	FBtr0072378	FBgn0000157	2169	GO:0035114,GO:0042048,GO:0045893,GO:0043565,GO:0007487,GO:0048264,GO:0007479,GO:0007485,GO:0016319,GO:0021553,GO:0007449,GO:0010629,GO:0010092,GO:0005634,GO:0035215,GO:0007480,GO:0048728,GO:0008587,GO:0007469		0.14	0.05	0.22	0	0	0	0	0	0	0.29		5.46	0	0	0	0	0	0	0	0	0	0	0	0	0	0.06	0	0	0	0	0	0	34.69	0	0	0	0	0	0	0	0	0.17	0.04
Dll	Distal-less	FBtr0072379	FBgn0000157	3094	GO:0035114,GO:0042048,GO:0045893,GO:0043565,GO:0007487,GO:0048264,GO:0007479,GO:0007485,GO:0016319,GO:0021553,GO:0007449,GO:0010629,GO:0010092,GO:0005634,GO:0035215,GO:0007480,GO:0048728,GO:0008587,GO:0007469		0	0	0	0	0	0	0	0.61	0	0		8.11	0	0.13	0	0	0	0	0.14	0	0	0	0.6	19.36	0	0	0	16.17	0	0	0	0	12.65	0	1	4.77	0	0	0	0	0	0	0
Dll	Distal-less	FBtr0300076	FBgn0000157	2244	GO:0035114,GO:0042048,GO:0045893,GO:0043565,GO:0007487,GO:0048264,GO:0007479,GO:0007485,GO:0016319,GO:0021553,GO:0007449,GO:0010629,GO:0010092,GO:0005634,GO:0035215,GO:0007480,GO:0048728,GO:0008587,GO:0007469		0	0	0	0	0	0	0	0	0	0		0.42	0	0	0	0	0	0	0	0	0	0	0	0	0	0	0	0	0	0	0	0	1.04	0	0	0	0	0	0	0	0	0	0
bam	bag of marbles	FBtr0084869	FBgn0000158	1894	GO:0048132,GO:0005737,GO:0000900,GO:0042078,GO:0045170,GO:0007140,GO:0007282,GO:0001708,GO:0048477,GO:0035212,GO:0098730,GO:0048135,GO:0017148,GO:0030727,GO:0007281,GO:0003730,GO:0007283,GO:0030718,GO:0007284,GO:0045169,GO:0007276,GO:0045478		0.11	0.29	2.38	0	0	0.37	2.16	0	0	0		0	0	0	0	0	0	0.15	0	0	0	0	0	0	2.98	0	0	0	0	0	0	0	0.1	0	0	0	0	0	0	0	0	0	0
baz	bazooka	FBtr0074388	FBgn0000163	6762	GO:0001738,GO:0005914,GO:0016325,GO:0007298,GO:0090250,GO:0008105,GO:0008356,GO:0070300,GO:0045167,GO:0035091,GO:0034332,GO:0060446,GO:0007299,GO:0045177,GO:0098592,GO:0045197,GO:0045186,GO:0045176,GO:0016332,GO:0007163,GO:0005915,GO:0008594,GO:2000040,GO:0051490,GO:0007377,GO:0045175,GO:0007309,GO:0035003,GO:0045179,GO:0090175,GO:0002009,GO:0005938,GO:0016324,GO:0055059,GO:0005515,GO:0030709,GO:…		0	0	0	0	0	0	0	0.99	2.12	1.45		0.12	0	0	0	0	0	0	0	0	0	0	0	0.09	1.86	0	0	2.01	0	0	0	0	1.86	0	0	0	0	0	0	0	0	0	0
baz	bazooka	FBtr0111000	FBgn0000163	10439	GO:0001738,GO:0005914,GO:0016325,GO:0007298,GO:0090250,GO:0008105,GO:0008356,GO:0070300,GO:0045167,GO:0035091,GO:0034332,GO:0060446,GO:0007299,GO:0045177,GO:0098592,GO:0045197,GO:0045186,GO:0045176,GO:0016332,GO:0007163,GO:0005915,GO:0008594,GO:2000040,GO:0051490,GO:0007377,GO:0045175,GO:0007309,GO:0035003,GO:0045179,GO:0090175,GO:0002009,GO:0005938,GO:0016324,GO:0055059,GO:0005515,GO:0030709,GO:…		0	0	0	0	0	0	0	0	0	0		0	0	0	0	0	0	0	0	0	0	0	0	0	0	0	0	0	0	0	0	0	0	0	0	0	0	0	0	0	0	0	0
baz	bazooka	FBtr0343763	FBgn0000163	6485	GO:0001738,GO:0005914,GO:0016325,GO:0007298,GO:0090250,GO:0008105,GO:0008356,GO:0070300,GO:0045167,GO:0035091,GO:0034332,GO:0060446,GO:0007299,GO:0045177,GO:0098592,GO:0045197,GO:0045186,GO:0045176,GO:0016332,GO:0007163,GO:0005915,GO:0008594,GO:2000040,GO:0051490,GO:0007377,GO:0045175,GO:0007309,GO:0035003,GO:0045179,GO:0090175,GO:0002009,GO:0005938,GO:0016324,GO:0055059,GO:0005515,GO:0030709,GO:…		0	0.06	0.07	0	0	0	0	0.58	0	0		0	0	0	0	0	0.02	0.35	0.41	0	0	0.45	0	0	0	14.14	9.74	0.63	0	0	0	0	0	0.01	0	0.11	0.73	0	0	0	0	0	0
baz	bazooka	FBtr0343764	FBgn0000163	10334	GO:0001738,GO:0005914,GO:0016325,GO:0007298,GO:0090250,GO:0008105,GO:0008356,GO:0070300,GO:0045167,GO:0035091,GO:0034332,GO:0060446,GO:0007299,GO:0045177,GO:0098592,GO:0045197,GO:0045186,GO:0045176,GO:0016332,GO:0007163,GO:0005915,GO:0008594,GO:2000040,GO:0051490,GO:0007377,GO:0045175,GO:0007309,GO:0035003,GO:0045179,GO:0090175,GO:0002009,GO:0005938,GO:0016324,GO:0055059,GO:0005515,GO:0030709,GO:…		0	0	0	0	0	0	0	0.07	0.59	0.65		0.04	0.15	0	0	0	0	0	0	0	0	0	0	0	2.73	0	0	0.64	0	0	0	0	0	0	0	0	0	0	0	0	0.03	0.03	0
bcd	bicoid	FBtr0081664	FBgn0000166	1479	GO:0003705,GO:0008358,GO:0017148,GO:0003730,GO:0045182,GO:0045944,GO:0008595,GO:0048477,GO:0043565,GO:0030371,GO:0016015,GO:0005515,GO:0007367,GO:0003700,GO:0007355,GO:0006355,GO:0006357,GO:0005634,GO:0006417,GO:0009948		0.18	0	0.34	0	0	0.43	0	0.01	0.31	0.44		0	0	0.87	0	0	0	0.2	0	0	0	1.36	0	0	0.12	0.39	0.06	0	0	0.87	0.08	0.3	0.62	0	0.14	0.36	1.33	0	0	0	0	0	0
bcd	bicoid	FBtr0081665	FBgn0000166	2499	GO:0003705,GO:0008358,GO:0017148,GO:0003730,GO:0045182,GO:0045944,GO:0008595,GO:0048477,GO:0043565,GO:0030371,GO:0016015,GO:0005515,GO:0007367,GO:0003700,GO:0007355,GO:0006355,GO:0006357,GO:0005634,GO:0006417,GO:0009948		0	0	0	0	0	0	0	0	0	0		0	0	0	0	0	0	0	0	0	0	0.41	0	0	0	0	0.51	0	0	0	0	0	0	0	0	0	0	0	0	0	0	0	0
bcd	bicoid	FBtr0081666	FBgn0000166	2536	GO:0003705,GO:0008358,GO:0017148,GO:0003730,GO:0045182,GO:0045944,GO:0008595,GO:0048477,GO:0043565,GO:0030371,GO:0016015,GO:0005515,GO:0007367,GO:0003700,GO:0007355,GO:0006355,GO:0006357,GO:0005634,GO:0006417,GO:0009948		0.26	0.63	0	0.41	0	0	0	0.19	0	0		0	0	0	0	0	0.17	0	0	0	0	0	0	0	0	0	0	0	0	0	0	0	0	0.31	0	0	0	0	0	0	0	0	0
bcd	bicoid	FBtr0081667	FBgn0000166	2521	GO:0003705,GO:0008358,GO:0017148,GO:0003730,GO:0045182,GO:0045944,GO:0008595,GO:0048477,GO:0043565,GO:0030371,GO:0016015,GO:0005515,GO:0007367,GO:0003700,GO:0007355,GO:0006355,GO:0006357,GO:0005634,GO:0006417,GO:0009948		0	0.02	0	0.1	0	0	0	0	0	0.19		0	0	0	0	0	0	0	0	0	0	0	0	0.04	0	0	0	0	0.31	0.18	0	0	0	0	0	0	0	0	0	0	0	0	0
bcd	bicoid	FBtr0081668	FBgn0000166	2514	GO:0003705,GO:0008358,GO:0017148,GO:0003730,GO:0045182,GO:0045944,GO:0008595,GO:0048477,GO:0043565,GO:0030371,GO:0016015,GO:0005515,GO:0007367,GO:0003700,GO:0007355,GO:0006355,GO:0006357,GO:0005634,GO:0006417,GO:0009948		0	0	0	0	0	0	0	0	0	0		0.03	0	0	0	0	0	0	0	0	0	0	0	0	0	0	0	0	0	0	0	0	0	0	0	0	0	0	0	0	0	0	0
ben	bendless	FBtr0073855	FBgn0000173	1890	GO:0046330,GO:0045977,GO:0031625,GO:0031624,GO:0007625,GO:0035370,GO:0006979,GO:0072347,GO:0051124,GO:0010942,GO:0061057,GO:0008594,GO:0004842,GO:0070534,GO:0007412,GO:1902916,GO:0006301,GO:0000209,GO:0061630,GO:0048471,GO:0007409,GO:0007629,GO:0060074,GO:0061631,GO:0005634,GO:0007630		0	0	0	0	0	0	9.71	23.12	5.99	0		1.57	0	0	0	0	0	11.54	2.09	47.65	10.3	89.64	112.87	0	68.88	0	0	0	0	0	0	0	0	47.41	0	27.16	0	55.91	50.66	52	0	35.7	64.29
ben	bendless	FBtr0300566	FBgn0000173	852	GO:0046330,GO:0045977,GO:0031625,GO:0031624,GO:0007625,GO:0035370,GO:0006979,GO:0072347,GO:0051124,GO:0010942,GO:0061057,GO:0008594,GO:0004842,GO:0070534,GO:0007412,GO:1902916,GO:0006301,GO:0000209,GO:0061630,GO:0048471,GO:0007409,GO:0007629,GO:0060074,GO:0061631,GO:0005634,GO:0007630		77.88	78.4	74.11	0	0	11.73	44.76	14	0	45.82		75.39	0	50.77	0	57.08	32.47	10.43	0	14.3	2.9	16.84	12.49	57.59	0	19.31	30.37	171.45	51.6	25.22	36.99	66.67	128.54	40.49	2.7	81.33	0	127.82	292.64	241.81	436.8	203.18	0
ben	bendless	FBtr0307296	FBgn0000173	2003	GO:0046330,GO:0045977,GO:0031625,GO:0031624,GO:0007625,GO:0035370,GO:0006979,GO:0072347,GO:0051124,GO:0010942,GO:0061057,GO:0008594,GO:0004842,GO:0070534,GO:0007412,GO:1902916,GO:0006301,GO:0000209,GO:0061630,GO:0048471,GO:0007409,GO:0007629,GO:0060074,GO:0061631,GO:0005634,GO:0007630		0	4.68	7.35	0	0	0	0	0	0	0		0.99	0	8.45	0	12.61	0	0	0	0	0	1.64	5.6	5.11	9.37	0	0	0	0	0	0	0	2	0	0	0.58	0	0	0	0	4.43	6.17	0
ben	bendless	FBtr0332843	FBgn0000173	1852	GO:0046330,GO:0045977,GO:0031625,GO:0031624,GO:0007625,GO:0035370,GO:0006979,GO:0072347,GO:0051124,GO:0010942,GO:0061057,GO:0008594,GO:0004842,GO:0070534,GO:0007412,GO:1902916,GO:0006301,GO:0000209,GO:0061630,GO:0048471,GO:0007409,GO:0007629,GO:0060074,GO:0061631,GO:0005634,GO:0007630		0	9.63	2.67	0	0	3.85	0	0	0	0		2.95	0	3.73	0	3.5	0	0	0	0	0	0	0	50.05	4.08	0	0	11.13	0	0	2.54	4.71	0	1.21	0	0	0	0	0	0	29.76	12.23	0
ben	bendless	FBtr0332844	FBgn0000173	1810	GO:0046330,GO:0045977,GO:0031625,GO:0031624,GO:0007625,GO:0035370,GO:0006979,GO:0072347,GO:0051124,GO:0010942,GO:0061057,GO:0008594,GO:0004842,GO:0070534,GO:0007412,GO:1902916,GO:0006301,GO:0000209,GO:0061630,GO:0048471,GO:0007409,GO:0007629,GO:0060074,GO:0061631,GO:0005634,GO:0007630		19.18	9.25	19.59	15.42	36.06	42.5	0	0	4.93	30.1		22.05	45.52	58.98	40.22	0	14.91	0	34.07	0	7.06	0.63	0	0	34.6	30.56	30.76	75.58	10.25	6.4	23.8	8.9	14.68	0	5.58	9.75	36.66	0	0	0	5.91	0	75.83
bi	bifid	FBtr0070672	FBgn0000179	4048	GO:0000978,GO:0003677,GO:0048100,GO:0000122,GO:0048066,GO:0005515,GO:0003700,GO:0035265,GO:0007476,GO:0003723,GO:0006355,GO:0007472,GO:0001745,GO:0005634		0	0	0	17.81	0	0	0	0	0.05	0		0	16.74	6.19	0	0.05	0	0	0	3.89	0	0.29	0	0	0	1.3	0	0	0	0	0	0	0	0	13.26	0.07	2.05	0	0	0	0.16	0.09	0
bi	bifid	FBtr0300608	FBgn0000179	4421	GO:0000978,GO:0003677,GO:0048100,GO:0000122,GO:0048066,GO:0005515,GO:0003700,GO:0035265,GO:0007476,GO:0003723,GO:0006355,GO:0007472,GO:0001745,GO:0005634		0	0	0	0	0	0	0	0	0	0		0	0	0	0	0	0	0	0	0	0	0	0	0	0	0	0	0	0	0	0	0	0	0	0	0	0	0	0	0	0	0	0
bi	bifid	FBtr0300609	FBgn0000179	4388	GO:0000978,GO:0003677,GO:0048100,GO:0000122,GO:0048066,GO:0005515,GO:0003700,GO:0035265,GO:0007476,GO:0003723,GO:0006355,GO:0007472,GO:0001745,GO:0005634		0.06	0.41	0	0	0	0	0	0	0	0		3.61	0	0	0	0	0	0.64	1.31	0	6.11	0	0	3.94	0	0	1.58	0.02	0	0	0.06	0	7.75	0.06	0	0	0	0	0	0	0	0	0
bi	bifid	FBtr0308914	FBgn0000179	5402	GO:0000978,GO:0003677,GO:0048100,GO:0000122,GO:0048066,GO:0005515,GO:0003700,GO:0035265,GO:0007476,GO:0003723,GO:0006355,GO:0007472,GO:0001745,GO:0005634		0	0	0	0	0	0	0	0	0	0		2.87	0.01	0	0	0	0	0	0	7.12	0.94	0	0	1.24	0	0	0	0	0	0	0	0	0	0	0	0	0	0	0	0	0	0	0
bi	bifid	FBtr0308915	FBgn0000179	5390	GO:0000978,GO:0003677,GO:0048100,GO:0000122,GO:0048066,GO:0005515,GO:0003700,GO:0035265,GO:0007476,GO:0003723,GO:0006355,GO:0007472,GO:0001745,GO:0005634		0.88	0	0.11	2.83	0	3.37	0.74	1.13	0	0.9		0.23	2.94	4.08	2.58	0.56	0	1.47	1.39	0	0	0.35	0	36.85	0	0.3	0.05	1.31	0	0	0.04	0	0	5.95	0	1	0.17	0	0	0	0	0	0.03
bi	bifid	FBtr0331162	FBgn0000179	4421	GO:0000978,GO:0003677,GO:0048100,GO:0000122,GO:0048066,GO:0005515,GO:0003700,GO:0035265,GO:0007476,GO:0003723,GO:0006355,GO:0007472,GO:0001745,GO:0005634		0	0	0	0	0	0	0	0	0	0		0	0	0	0	0	0	0	0	0	0	0	0	0	0	0	0	0	0	0	0	0	0	0	0	0	0	0	0	0	0	0	0
bi	bifid	FBtr0343569	FBgn0000179	5613	GO:0000978,GO:0003677,GO:0048100,GO:0000122,GO:0048066,GO:0005515,GO:0003700,GO:0035265,GO:0007476,GO:0003723,GO:0006355,GO:0007472,GO:0001745,GO:0005634		0	3.91	0	0	0	0	0	0	0	0		5.36	0	0	0.95	0	0	0	0	0	0	0	0	7.12	0.12	0	0	0	0	0	0	0	2.76	0	0	0	0	0	0	0	0	0	0
bib	big brain	FBtr0079929	FBgn0000180	3276	GO:0005887,GO:0016337,GO:0005216,GO:0005372,GO:0007219,GO:0007399,GO:0005886,GO:0007498,GO:0044719,GO:0031410,GO:0015267,GO:0046331,GO:0005912,GO:0007398,GO:0016021,GO:0055085,GO:0030707,GO:0005261		0	0.02	0.11	0.03	0	0.01	0	0.35	0	0.22		0.69	0	12.12	0	0.36	0	0.02	1.21	3.96	0	0.19	5.55	0.45	0	0	0	5.08	11.72	1.48	7.38	9.7	2.83	1.56	0	9.22	0.89	0	0	0	0	0	25.37
bib	big brain	FBtr0329984	FBgn0000180	3276	GO:0005887,GO:0016337,GO:0005216,GO:0005372,GO:0007219,GO:0007399,GO:0005886,GO:0007498,GO:0044719,GO:0031410,GO:0015267,GO:0046331,GO:0005912,GO:0007398,GO:0016021,GO:0055085,GO:0030707,GO:0005261		0	0.02	0.11	0.03	0	0.01	0	0.35	0	0.22		0.69	0	12.12	0	0.36	0	0.02	1.21	3.96	0	0.19	5.55	0.45	0	0	0	5.08	11.72	1.48	7.38	9.7	2.83	1.56	0	9.22	0.89	0	0	0	0	0	25.37
bic	bicaudal	FBtr0087782	FBgn0000181	1474	GO:0015031,GO:0008565,GO:0060811,GO:0007317,GO:0005515,GO:0005854,GO:0070201,GO:0007318,GO:0001700		212.85	188.66	185.38	114.23	81.34	72.23	38.99	134.75	51.72	97.38		94.43	103.68	199.41	38.34	70.38	80.02	19.58	38.15	82.78	23.56	115.99	75.26	77.26	121.86	96.5	23.03	122.39	50.9	46.13	52.52	53.08	92.62	87.94	15.22	99.84	66.97	97.02	90.36	83.11	108.89	114.83	89.35
bic	bicaudal	FBtr0087783	FBgn0000181	992	GO:0015031,GO:0008565,GO:0060811,GO:0007317,GO:0005515,GO:0005854,GO:0070201,GO:0007318,GO:0001700		189.15	227.39	215.32	62.27	0	135.87	200.91	373.25	353.03	310.22		278.46	10.46	0	513.68	298.07	180.1	0	127.32	1.12	0	219.97	92.15	206.27	141.21	0.24	20.47	217	143.12	29.47	264.47	186.42	183.49	173.64	0	452.31	0	50.3	44.87	29.46	132.31	25.1	0.25
BicC	Bicaudal C	FBtr0080803	FBgn0000182	4022	GO:0003729,GO:0030036,GO:0000278,GO:0048477,GO:0000226,GO:0007297,GO:0005515,GO:0007319,GO:0003723		0	0	0	0	0	0	0	0	0	0		0.04	0	0	0	0.06	0	0	0	0	0	0	0	0	0	0	0.12	0.42	0	0	0	0	0	0	0	0.4	0	0	0	0	0	0	0
BicC	Bicaudal C	FBtr0080804	FBgn0000182	3830	GO:0003729,GO:0030036,GO:0000278,GO:0048477,GO:0000226,GO:0007297,GO:0005515,GO:0007319,GO:0003723		0	0	0	0	0	0	0	0	0	0		0	0	0	0	0	1	0	0	0	0	0	0	0	0	0	0	0	0	0	0	0.03	0.92	0.21	0	0.03	0	0	0	0	0	0	0
BicC	Bicaudal C	FBtr0080805	FBgn0000182	3018	GO:0003729,GO:0030036,GO:0000278,GO:0048477,GO:0000226,GO:0007297,GO:0005515,GO:0007319,GO:0003723		0	0	0	0	0	0	0	0	0	0		0	0	0	0	0	14.5	0	0	0	0	0	0	0	0	0	0	0	0	0	0	0	0.63	0	0	0.38	0	0	0	0	0	0	0
BicD	Bicaudal D	FBtr0081002	FBgn0000183	4149	GO:0050658,GO:0016325,GO:0005737,GO:0017137,GO:0003729,GO:0048477,GO:0008298,GO:0032050,GO:0007309,GO:0007312,GO:0070840,GO:2000370,GO:0030669,GO:0051028,GO:0005515,GO:2000302,GO:0007293,GO:0030100,GO:0005829,GO:0008103,GO:0007294,GO:0048488,GO:0070727,GO:0005794		23.34	16.31	16.01	1.84	0	0	0	12.33	2.5	8.05		8.59	0	0	0	5.61	0	0	0	0	0	17.54	0	18.91	4.03	2.1	0	0.17	19.91	0.23	2.31	20.55	0	0	0	13.06	0	2.18	0.33	0	0	0	0
BicD	Bicaudal D	FBtr0305688	FBgn0000183	3705	GO:0050658,GO:0016325,GO:0005737,GO:0017137,GO:0003729,GO:0048477,GO:0008298,GO:0032050,GO:0007309,GO:0007312,GO:0070840,GO:2000370,GO:0030669,GO:0051028,GO:0005515,GO:2000302,GO:0007293,GO:0030100,GO:0005829,GO:0008103,GO:0007294,GO:0048488,GO:0070727,GO:0005794		16.95	33.83	22.21	1.12	0.04	26.65	0.26	16.91	24.28	29.89		14.88	0.24	0	4.03	83.95	70.1	0.15	40.6	0	4.49	10.45	0	8.06	0	9.36	0	14.27	11.49	5.82	58.05	0.46	16.49	0.2	0	4.98	0	0	0	1.21	4.23	0	0
BicD	Bicaudal D	FBtr0330225	FBgn0000183	5361	GO:0050658,GO:0016325,GO:0005737,GO:0017137,GO:0003729,GO:0048477,GO:0008298,GO:0032050,GO:0007309,GO:0007312,GO:0070840,GO:2000370,GO:0030669,GO:0051028,GO:0005515,GO:2000302,GO:0007293,GO:0030100,GO:0005829,GO:0008103,GO:0007294,GO:0048488,GO:0070727,GO:0005794		28.26	52.14	42.96	20.88	72.72	21.48	87.17	46.8	19.1	39.92		15.6	64.15	92.73	90.45	27.4	35.71	25.82	49.36	76.43	18.09	37.77	50.31	51.64	52.07	52.18	55.03	18.99	19.35	24.44	19.56	26	15.44	49.94	31.8	37.76	245.25	0.44	0.74	0.68	0.19	2.36	0.46
BicD	Bicaudal D	FBtr0330226	FBgn0000183	4149	GO:0050658,GO:0016325,GO:0005737,GO:0017137,GO:0003729,GO:0048477,GO:0008298,GO:0032050,GO:0007309,GO:0007312,GO:0070840,GO:2000370,GO:0030669,GO:0051028,GO:0005515,GO:2000302,GO:0007293,GO:0030100,GO:0005829,GO:0008103,GO:0007294,GO:0048488,GO:0070727,GO:0005794		23.34	16.31	16.01	1.84	0	0	0	12.33	2.5	8.05		8.59	0	0	0	5.61	0	0	0	0	0	17.54	0	18.91	4.03	2.1	0	0.17	19.91	0.23	2.31	20.55	0	0	0	13.06	0	2.18	0.33	0	0	0	0
boss	bride of sevenless	FBtr0084949	FBgn0000206	3013	GO:0030297,GO:0007601,GO:0045466,GO:0042593,GO:0007465,GO:0005887,GO:0009749,GO:0007165,GO:0051966,GO:0005771,GO:0055088,GO:0005118,GO:0007216,GO:0005102,GO:0050730,GO:0004888,GO:0045470,GO:0008066,GO:0031528,GO:0004930,GO:0016021,GO:0045467		0	0	0	0	0	0	0	0	0	0		0.1	0	0	0	0	0	0	0	0	0	0	0	0	0	0	0	0	0	0	0	0	0.19	2.47	0	0	0	0	0	0	0	0	0
brm	brahma	FBtr0075523	FBgn0000212	5327	GO:0007474,GO:0048666,GO:2000648,GO:0070604,GO:0070983,GO:0045742,GO:0006909,GO:0043974,GO:0045088,GO:0008094,GO:0042393,GO:0035329,GO:0005524,GO:0048477,GO:0007406,GO:2000134,GO:0045893,GO:0043697,GO:0008586,GO:0043044,GO:0036335,GO:0007517,GO:0048813,GO:0016514,GO:1902692,GO:0005515,GO:0016887,GO:0007409,GO:0035060,GO:0035172,GO:0006357,GO:0005634,GO:0007480,GO:0007419,GO:0008587		3.25	17.56	10.57	0	0.04	0	0.15	12.56	0.04	0.03		0.88	0	0	0.01	0.03	0.01	0	0	0	0.01	4.18	0.01	3.54	10.71	0	0	0.01	0.07	0.04	0	11.99	12.88	0.02	0	0.03	0.01	0	0	0.05	0	0.01	0
brm	brahma	FBtr0075524	FBgn0000212	5322	GO:0007474,GO:0048666,GO:2000648,GO:0070604,GO:0070983,GO:0045742,GO:0006909,GO:0043974,GO:0045088,GO:0008094,GO:0042393,GO:0035329,GO:0005524,GO:0048477,GO:0007406,GO:2000134,GO:0045893,GO:0043697,GO:0008586,GO:0043044,GO:0036335,GO:0007517,GO:0048813,GO:0016514,GO:1902692,GO:0005515,GO:0016887,GO:0007409,GO:0035060,GO:0035172,GO:0006357,GO:0005634,GO:0007480,GO:0007419,GO:0008587		0	1.67	4.22	0	23.48	0	61.5	0	27.65	4.94		2.53	0	4.65	13.75	0	17.55	1.22	0	4.11	7.6	0	2.59	0	0	2.03	0	6.19	21.52	43.74	40.55	1.48	0	4.18	0	6.2	17.39	0.53	0.18	12.22	2.2	4.89	3.17
brm	brahma	FBtr0075525	FBgn0000212	5339	GO:0007474,GO:0048666,GO:2000648,GO:0070604,GO:0070983,GO:0045742,GO:0006909,GO:0043974,GO:0045088,GO:0008094,GO:0042393,GO:0035329,GO:0005524,GO:0048477,GO:0007406,GO:2000134,GO:0045893,GO:0043697,GO:0008586,GO:0043044,GO:0036335,GO:0007517,GO:0048813,GO:0016514,GO:1902692,GO:0005515,GO:0016887,GO:0007409,GO:0035060,GO:0035172,GO:0006357,GO:0005634,GO:0007480,GO:0007419,GO:0008587		16.2	7.3	4.95	10.39	0	13.12	11.2	8.07	0	0		3.13	0.98	0	0	0.37	0	0	0	0	0	0	0	0	0	0	12.67	2.68	0	0	10.1	6.78	1.14	0	0	0	0	0	0	0	0	0	0
brm	brahma	FBtr0075526	FBgn0000212	5553	GO:0007474,GO:0048666,GO:2000648,GO:0070604,GO:0070983,GO:0045742,GO:0006909,GO:0043974,GO:0045088,GO:0008094,GO:0042393,GO:0035329,GO:0005524,GO:0048477,GO:0007406,GO:2000134,GO:0045893,GO:0043697,GO:0008586,GO:0043044,GO:0036335,GO:0007517,GO:0048813,GO:0016514,GO:1902692,GO:0005515,GO:0016887,GO:0007409,GO:0035060,GO:0035172,GO:0006357,GO:0005634,GO:0007480,GO:0007419,GO:0008587		3.44	4.63	3.62	0	0	0	0	11.24	0	23.99		0.23	0	0	0	34.03	0	0	6.45	0	0	4.12	0	0	0	0	0	0	2.87	0	0	11.92	0.62	0	0	0	0	0	0	0	0	0	0
brm	brahma	FBtr0330160	FBgn0000212	5339	GO:0007474,GO:0048666,GO:2000648,GO:0070604,GO:0070983,GO:0045742,GO:0006909,GO:0043974,GO:0045088,GO:0008094,GO:0042393,GO:0035329,GO:0005524,GO:0048477,GO:0007406,GO:2000134,GO:0045893,GO:0043697,GO:0008586,GO:0043044,GO:0036335,GO:0007517,GO:0048813,GO:0016514,GO:1902692,GO:0005515,GO:0016887,GO:0007409,GO:0035060,GO:0035172,GO:0006357,GO:0005634,GO:0007480,GO:0007419,GO:0008587		16.2	7.3	4.95	10.39	0	13.12	11.2	8.07	0	0		3.13	0.98	0	0	0.37	0	0	0	0	0	0	0	0	0	0	12.67	2.68	0	0	10.1	6.78	1.14	0	0	0	0	0	0	0	0	0	0
brm	brahma	FBtr0333580	FBgn0000212	5351	GO:0007474,GO:0048666,GO:2000648,GO:0070604,GO:0070983,GO:0045742,GO:0006909,GO:0043974,GO:0045088,GO:0008094,GO:0042393,GO:0035329,GO:0005524,GO:0048477,GO:0007406,GO:2000134,GO:0045893,GO:0043697,GO:0008586,GO:0043044,GO:0036335,GO:0007517,GO:0048813,GO:0016514,GO:1902692,GO:0005515,GO:0016887,GO:0007409,GO:0035060,GO:0035172,GO:0006357,GO:0005634,GO:0007480,GO:0007419,GO:0008587		0	0	0	0	0	0	0	0	0	0		0	0	0	0	0	0	0	0	0	0	0	0	0	0	0	0	0	0	0	0	0	0	0	0	0	0	0	0	0	0	0	0
Brd	Bearded	FBtr0075621	FBgn0000216	532	GO:0007219,GO:0007423,GO:0001708,GO:0016360,GO:0005515		0	0	0	0	0	0	0	0	0	0		0.17	0	0	0	0	0	0	0	0	0	0	0	0	0	0	0	0	0	0	0	0	0	0	0	0	0	0	0	0	0	0	0
brn	brainiac	FBtr0070638	FBgn0000221	1450	GO:0016020,GO:0007298,GO:0001744,GO:0007299,GO:0006486,GO:0048477,GO:0005576,GO:0016333,GO:0046981,GO:0008375,GO:0008378,GO:0042248,GO:0006688,GO:0007293,GO:0005795,GO:0030707		0.07	3.87	1.55	0.29	0	0	0	0.11	0	0		0.8	0	0	0	0.1	0	0	0	0	0	2.06	0	0.52	0	0	0	0	12.79	0	3.69	0	0	0	0	2.89	0	5.76	1.77	0.94	52.9	2.51	0
Bsg25A	Blastoderm-specific gene 25A	FBtr0077423	FBgn0000227	1352	GO:0043565,GO:0043035,GO:0031937,GO:0005677,GO:0001700,GO:0005634		0	0	0	0	0	0	0	0	0	0		0	0	0	0	0	0	0	0	0	0	0	0	0	0	0	0	0	0	0	0	0	0	0	0	0	0	0	0	0	0	0	0
Bsg25D	Blastoderm-specific gene 25D	FBtr0079084	FBgn0000228	4585	GO:0034994,GO:0000242,GO:0008017,GO:0005813		0	0	0	0	0	0	0	4.86	0	0		0	0	0	0	0	7.24	0	0	0	0	0	0	0	0	0	0	0	0	0	0	0	0	0	0	0	0	0	0	0	0	0	0
Bsg25D	Blastoderm-specific gene 25D	FBtr0079085	FBgn0000228	4065	GO:0034994,GO:0000242,GO:0008017,GO:0005813		14.3	14.45	9.2	9.41	1.77	10.34	0	0	8.56	13.92		4.88	30.13	0	80.87	19.87	7.89	0.98	3.5	21.76	7.59	50.07	11.39	19.31	16.36	3.6	0.51	19.48	0.64	3.54	0	8.48	17.97	25.19	9.6	9.63	26.83	2.77	1.65	3.33	3.19	4.05	1.93
Bsg25D	Blastoderm-specific gene 25D	FBtr0302567	FBgn0000228	2514	GO:0034994,GO:0000242,GO:0008017,GO:0005813		3.89	9.43	0.38	5.42	5.21	6.55	0	0	0.23	0.63		0.33	7.93	0	0	4.66	0	0	0.21	0	0	1.81	0	1.94	0	0	100.51	2.61	6.87	12.09	0.47	0	5.73	13.92	0	0.05	0	0	4.07	0	0	0	0
Bsg25D	Blastoderm-specific gene 25D	FBtr0302568	FBgn0000228	4549	GO:0034994,GO:0000242,GO:0008017,GO:0005813		0	9.51	15.1	1.99	0	0.34	0	6.27	2.38	0		2.45	0	0	0	0	0	0	0	0	0	4.87	0	0	4.68	0	0	9.5	8.32	0	1.72	0	5.03	0	0	4.07	0	0	0	0	0	0	0
Bsg25D	Blastoderm-specific gene 25D	FBtr0310624	FBgn0000228	4525	GO:0034994,GO:0000242,GO:0008017,GO:0005813		5.08	0	0	0	0	0	1.86	0.43	0	3.85		0	5.15	3.56	0	5.22	0	1.43	5.7	0	0.28	3.77	0	1.68	0	0	1.67	0	0	0	17.56	0.71	0	0.37	0	11.66	0	2.37	1.97	0	5.38	0	0
Bsg25D	Blastoderm-specific gene 25D	FBtr0310625	FBgn0000228	4666	GO:0034994,GO:0000242,GO:0008017,GO:0005813		0	0	0	0	0	0	0	0	0	0		2.3	0	0	0	0	0	0	0	0	0	0	0	0	0	0	0	0	0	0.19	0	0	0	0	0	0	0	0	0	0	0	0	0
Bsg25D	Blastoderm-specific gene 25D	FBtr0342939	FBgn0000228	3010	GO:0034994,GO:0000242,GO:0008017,GO:0005813		0	0	0	0	0	0	0	2.58	0	0		0	0	0	0	0	0.1	0	0	0	0	0	0	0	0	0	0	0	0	0	0.04	0	0	0	0	0	0	0	0	0	0	0	0
bsk	basket	FBtr0080087	FBgn0000229	1535	GO:0030425,GO:0007258,GO:0005737,GO:0004672,GO:0071907,GO:0009408,GO:0016055,GO:0005524,GO:0043508,GO:0048812,GO:0048615,GO:0035006,GO:0000165,GO:0048803,GO:0010508,GO:0004674,GO:0046843,GO:0009267,GO:0016319,GO:0004705,GO:0046844,GO:0071243,GO:1903688,GO:1904801,GO:0030707,GO:0001736,GO:0048674,GO:0007391,GO:0048666,GO:0007298,GO:0043652,GO:0006979,GO:0034599,GO:0019731,GO:0010468,GO:0048675,GO:…		65.86	76.39	31.19	130.82	14.21	139.92	137.85	36.81	41.47	16.41		33.14	13.21	13.76	1.67	4.62	37.85	29.99	85.94	55.3	39.4	145.3	104.43	19.64	110.76	96.19	4	55.4	25	55.45	95.56	28.88	48.92	92.75	12.55	59.68	407.35	126.51	108.33	164.03	172.26	109.71	142.91
bsk	basket	FBtr0300982	FBgn0000229	1655	GO:0030425,GO:0007258,GO:0005737,GO:0004672,GO:0071907,GO:0009408,GO:0016055,GO:0005524,GO:0043508,GO:0048812,GO:0048615,GO:0035006,GO:0000165,GO:0048803,GO:0010508,GO:0004674,GO:0046843,GO:0009267,GO:0016319,GO:0004705,GO:0046844,GO:0071243,GO:1903688,GO:1904801,GO:0030707,GO:0001736,GO:0048674,GO:0007391,GO:0048666,GO:0007298,GO:0043652,GO:0006979,GO:0034599,GO:0019731,GO:0010468,GO:0048675,GO:…		0	0	0	0	0	0.55	0	0	0	0		0	0	0	0	0	0	0	11.47	0	4.56	0	0	1.16	5.06	0	37.21	0	0	0	1.49	0	4.37	0	0	0	0	0	0	5	3.68	2.3	5.22
bsk	basket	FBtr0302378	FBgn0000229	1797	GO:0030425,GO:0007258,GO:0005737,GO:0004672,GO:0071907,GO:0009408,GO:0016055,GO:0005524,GO:0043508,GO:0048812,GO:0048615,GO:0035006,GO:0000165,GO:0048803,GO:0010508,GO:0004674,GO:0046843,GO:0009267,GO:0016319,GO:0004705,GO:0046844,GO:0071243,GO:1903688,GO:1904801,GO:0030707,GO:0001736,GO:0048674,GO:0007391,GO:0048666,GO:0007298,GO:0043652,GO:0006979,GO:0034599,GO:0019731,GO:0010468,GO:0048675,GO:…		19.54	28.55	60.68	21.6	1.01	0	75.24	18.81	18.74	54.11		5.89	0	0	0	30.98	0	0	2.93	0	0	121.39	0	5.25	0	0	0	7.97	40.08	1.63	0.75	20.09	0	14.77	0	74.53	0	11.46	19.22	0	19.86	0	0.58
btd	buttonhead	FBtr0071379	FBgn0000233	2934	GO:0003705,GO:0045944,GO:0035288,GO:0000122,GO:0043565,GO:0045664,GO:0007376,GO:0008134,GO:1902692,GO:0003700,GO:0035289,GO:0005634,GO:0007480		0	0	0	0	0	0	0	3.01	0.03	0.04		0.41	0	0	0	0	0	0.05	0	0	0	0	0	0	0	0	0	0	0	0	0	0.04	4.87	0.06	0	0.04	0	0	0	0	0	0	0.09
bur	burgundy	FBtr0301342	FBgn0000239	2915	GO:0005524,GO:0043234,GO:0005700,GO:0035800,GO:0016462,GO:0016578,GO:0006177,GO:0003921,GO:0003922,GO:2000152,GO:0007411		16.31	20.45	14.64	16.38	7.72	0.4	0	21.07	38.85	21.66		3.89	11.72	128.81	7.51	10.22	17.38	0.24	3.52	0.44	15.06	24.6	11.84	0	11.76	7.46	1.46	0	27.42	6.55	13.79	19.74	18.04	19.34	0	0	3.04	0	7.05	0	1.03	0	0
bur	burgundy	FBtr0343875	FBgn0000239	3116	GO:0005524,GO:0043234,GO:0005700,GO:0035800,GO:0016462,GO:0016578,GO:0006177,GO:0003921,GO:0003922,GO:2000152,GO:0007411		13.86	13.68	14.99	12.19	0	4.52	23.01	19.79	0.48	1.14		10.42	0.64	5.15	0	6.23	0.57	0	3.74	0	0.65	17.11	1.47	3.01	9.94	1.19	0	17.74	1.17	0	2.65	1.95	7.25	7.81	0	27.76	0	2.81	0	2.37	1.55	7.37	6.52
bw	brown	FBtr0072117	FBgn0000241	2738	GO:0006856,GO:0005430,GO:0005524,GO:0005886,GO:0017127,GO:0015842,GO:0034041,GO:0006727,GO:0016021,GO:0055085,GO:0042626,GO:0007605		0	0	1.01	0.04	0	0	0.06	0	0	0		0.05	0.34	0	0	0.12	0	1.91	0	1.65	0	0.44	0	0.45	0.16	1.99	0	0.25	0	0	0	0.73	0	0.43	0.43	2.05	0	0	0	0	0	0	0
bw	brown	FBtr0346612	FBgn0000241	2498	GO:0006856,GO:0005430,GO:0005524,GO:0005886,GO:0017127,GO:0015842,GO:0034041,GO:0006727,GO:0016021,GO:0055085,GO:0042626,GO:0007605		0.17	0.13	0	0	0	0	0	0.06	0	0.66		0	0	0	0	0	0	0	0	0	0	0	0	0	0	0	0	0	0.05	0	0	0	0	0	0	0	0.09	0	0	0	0	0	0
by	blistery	FBtr0082119	FBgn0000244	2993	GO:0005925,GO:0003779,GO:0007016,GO:0007475,GO:0007476		1.52	0	0.03	0	0	1.12	0	0	0	0.1		3.26	0	0	0	0	0	0	0	0	0	0	0	0.29	0	0	10.64	7	0	0	0	0	1.35	1.24	0	0.69	0	0	0	0	0	0	0.32
by	blistery	FBtr0301093	FBgn0000244	4774	GO:0005925,GO:0003779,GO:0007016,GO:0007475,GO:0007476		1.3	1.02	0	0	0	0	0	1.38	0	0.71		0	0	5.41	0.53	0	0	0	0	0	0	0	4.66	0.24	0.17	0	0	0.09	0.08	0.03	0.81	0	0	0	0	0.49	0	0	0	0	0	0	0
by	blistery	FBtr0302382	FBgn0000244	4378	GO:0005925,GO:0003779,GO:0007016,GO:0007475,GO:0007476		0.57	0	0.16	0	0	0	0	0.02	0	0		0	0	0	0.06	0.41	0	0	0	0	0	0.2	0	0	0	0	0	0	0	0	0	0	0	19.62	0	0	0	0	0	0	0	0	0
c(3)G	crossover suppressor on 3 of Gowen	FBtr0083194	FBgn0000246	2617	GO:0007131,GO:0007130,GO:0000795		0	0	0	0	0	0	9.08	0	0.12	0		0	0	0	1.19	0	0	0	0	0	0	0	0	0	0	0	0	0	0.1	0	0	0	0	0	0	0	0	0	0	0	0	0	0
c(3)G	crossover suppressor on 3 of Gowen	FBtr0083195	FBgn0000246	2594	GO:0007131,GO:0007130,GO:0000795		3.28	2.39	4.72	2.87	0	0	10.56	1.8	0	4.19		1.73	0.52	0	0	11.41	3.02	0	0.14	0	0	0	0	11.32	5.02	9.29	7.65	0	0	11.39	6.23	0.24	4.79	0.74	0.75	12.72	0.09	0	0.78	1.93	0.13	0.14	10.29
c(3)G	crossover suppressor on 3 of Gowen	FBtr0083196	FBgn0000246	2629	GO:0007131,GO:0007130,GO:0000795		0	2.92	0	0	0	0	0	0	0	0		0	0	0	0	0	0	0	0	0	0	1.06	1.32	0	0	0	0	1.68	0	0	0	0	0	0	0	0	0	0	0	0	0	0	0
ca	claret	FBtr0085484	FBgn0000247	7026	GO:0006856,GO:0017137,GO:0017112,GO:0060967,GO:0010506,GO:0005575,GO:0008057,GO:0006727,GO:0032483,GO:0010883		7.94	2.27	6.4	0	0	0	0.17	2.4	0.31	8.2		3.85	0	10.4	0	5.17	1.1	5.33	0.53	1.36	0.42	11.57	0	0	1.74	0	18.06	0.34	6.42	0.19	0.85	2.45	4.24	0.84	0	1.47	0	0.08	0	0	0.97	0.99	0
ca	claret	FBtr0346613	FBgn0000247	6398	GO:0006856,GO:0017137,GO:0017112,GO:0060967,GO:0010506,GO:0005575,GO:0008057,GO:0006727,GO:0032483,GO:0010883		40.54	60.13	47.19	26.58	6.33	11.23	11.85	54.31	45.27	39.59		4.34	0.9	20.99	79.36	62.48	32.43	0	9.15	19.04	1.74	3.09	15.19	22.45	19.44	2.69	0	26.53	27.63	36.36	22.56	17.91	5.2	86.61	36.25	17.02	0.85	0	0	0.69	1.55	0	12.26
cact	cactus	FBtr0080844	FBgn0000250	1893	GO:0005737,GO:0006909,GO:0019732,GO:0007399,GO:0006967,GO:0042994,GO:0009620,GO:0048477,GO:0019730,GO:0006952,GO:0008134,GO:0046843,GO:0005515,GO:0045087,GO:0031594,GO:0008063,GO:0006974,GO:0030097,GO:0009950,GO:0006955		0	0	0	0	0	0	0	0	0	0		0	0	0	0	0	0	0	0	0	0	0	0	0	0	1.53	13.45	0	0	0	0	0	0	0	0.75	0	0	0.48	0	2.27	0	0	0
cact	cactus	FBtr0080845	FBgn0000250	2005	GO:0005737,GO:0006909,GO:0019732,GO:0007399,GO:0006967,GO:0042994,GO:0009620,GO:0048477,GO:0019730,GO:0006952,GO:0008134,GO:0046843,GO:0005515,GO:0045087,GO:0031594,GO:0008063,GO:0006974,GO:0030097,GO:0009950,GO:0006955		2.86	11.82	35.06	36.79	1.05	0	0.24	88.55	105.9	47.5		9.87	0	0	0	0	0	89.31	2.15	1.5	0	8.99	30.21	7.36	26.22	0	0	98.05	26.15	0	12.33	65.24	65.91	66.1	0	47.54	0	0	0	0	5.14	0	1.55
cact	cactus	FBtr0080846	FBgn0000250	2356	GO:0005737,GO:0006909,GO:0019732,GO:0007399,GO:0006967,GO:0042994,GO:0009620,GO:0048477,GO:0019730,GO:0006952,GO:0008134,GO:0046843,GO:0005515,GO:0045087,GO:0031594,GO:0008063,GO:0006974,GO:0030097,GO:0009950,GO:0006955		90.22	129.48	122.05	73.97	8.18	30.06	34.73	100.37	92.94	108.3		21.05	26.1	40.37	2.66	48.32	56.83	16.94	1.18	22.25	3.34	62.81	48.51	20.1	151.92	15.15	10	22.3	23.03	26.09	11.57	20.61	7.88	44.92	30.62	84.95	22.22	13.48	11.09	12.7	16.08	11.46	9.28
cact	cactus	FBtr0080847	FBgn0000250	2178	GO:0005737,GO:0006909,GO:0019732,GO:0007399,GO:0006967,GO:0042994,GO:0009620,GO:0048477,GO:0019730,GO:0006952,GO:0008134,GO:0046843,GO:0005515,GO:0045087,GO:0031594,GO:0008063,GO:0006974,GO:0030097,GO:0009950,GO:0006955		12.77	22	15.65	3.39	0	0.07	6.48	8.18	3.18	3.33		1.15	0.12	0	0	13.44	2.29	0.34	5.75	0.08	1.77	0.14	17.34	0.05	0.76	0	2.03	0.92	6.8	26.55	1.2	6.36	0.83	1.21	0	4.29	0.15	0	0	0	0	0	0.19
cact	cactus	FBtr0337081	FBgn0000250	1999	GO:0005737,GO:0006909,GO:0019732,GO:0007399,GO:0006967,GO:0042994,GO:0009620,GO:0048477,GO:0019730,GO:0006952,GO:0008134,GO:0046843,GO:0005515,GO:0045087,GO:0031594,GO:0008063,GO:0006974,GO:0030097,GO:0009950,GO:0006955		0	0	0.27	0	0	0	0	0.11	0	0		0	0	0	0	0	0	0	0	0	0	0	0	0	0	0	0	0	0	0	0	0	0	0	0	0	0	0	0	0	0	0	0
cad	caudal	FBtr0081412	FBgn0000251	2516	GO:0002807,GO:0007443,GO:0005737,GO:0000977,GO:0045944,GO:0045893,GO:0007487,GO:0009887,GO:0007377,GO:0007350,GO:0007442,GO:0035224,GO:0010004,GO:0003700,GO:0030154,GO:0005634,GO:0035215,GO:0009948,GO:0007379,GO:0008284		0	0.09	0	0	0	0	0	0	0	0.24		0.1	0	0	0	0	0	0	0	0	0	0	0	0.1	0	0	0	63.95	0	0	0	0	0	0.4	0	0.25	0	0	0	0	0	0	0
cad	caudal	FBtr0081413	FBgn0000251	2353	GO:0002807,GO:0007443,GO:0005737,GO:0000977,GO:0045944,GO:0045893,GO:0007487,GO:0009887,GO:0007377,GO:0007350,GO:0007442,GO:0035224,GO:0010004,GO:0003700,GO:0030154,GO:0005634,GO:0035215,GO:0009948,GO:0007379,GO:0008284		0	0	0	0	0	0	0	0	0	0		0	0	0	0	0.23	0	0	0	0	0	1.36	0	0	0.06	0	0	0	0	0	0	0	0	0	0	0	0	0	0	0	0	0	0
cad	caudal	FBtr0335152	FBgn0000251	2570	GO:0002807,GO:0007443,GO:0005737,GO:0000977,GO:0045944,GO:0045893,GO:0007487,GO:0009887,GO:0007377,GO:0007350,GO:0007442,GO:0035224,GO:0010004,GO:0003700,GO:0030154,GO:0005634,GO:0035215,GO:0009948,GO:0007379,GO:0008284		0	0	0	0	0	0	0	0	0	0		0	0	0	0	0	0	0	0	0	0	0	0	0	0	0	0	0	0	0	0	0	0	0	0	0	0	0	0	0	0	0	0
Cam	Calmodulin	FBtr0088001	FBgn0000253	1488	GO:0030048,GO:0016056,GO:0005737,GO:0016061,GO:0005654,GO:0031476,GO:0007099,GO:0016060,GO:0031475,GO:0016028,GO:0016059,GO:0030496,GO:0005886,GO:0016062,GO:0007608,GO:0070855,GO:0097431,GO:0046716,GO:0005509,GO:0051383,GO:2001020,GO:0005515,GO:0031489,GO:0072686,GO:0046331,GO:0006468,GO:0042052,GO:0032036,GO:0005829,GO:0005819,GO:2001259,GO:0005813,GO:0035071,GO:0005814,GO:0072499,GO:0007605		243.62	243.77	101.51	82.71	179.58	256.54	263.28	405.2	363.33	180.36		884.97	0	612.11	0	220.41	109.15	0	101.52	0.03	0	562.02	748.38	817.42	1776.07	660.5	0	443.4	63.79	0	73.05	88.95	533.24	397.33	191.59	190.4	0	2570.8	2083.74	2410.7	4971.13	3449.52	97.23
Cam	Calmodulin	FBtr0088002	FBgn0000253	695	GO:0030048,GO:0016056,GO:0005737,GO:0016061,GO:0005654,GO:0031476,GO:0007099,GO:0016060,GO:0031475,GO:0016028,GO:0016059,GO:0030496,GO:0005886,GO:0016062,GO:0007608,GO:0070855,GO:0097431,GO:0046716,GO:0005509,GO:0051383,GO:2001020,GO:0005515,GO:0031489,GO:0072686,GO:0046331,GO:0006468,GO:0042052,GO:0032036,GO:0005829,GO:0005819,GO:2001259,GO:0005813,GO:0035071,GO:0005814,GO:0072499,GO:0007605		0	0	0	0	393.96	0	0	0	0	0		0	0	0	0	0	0	0	0	0	0	0	0	0	0	0	0	0	0	0	48.66	0	0	109.23	0	158.44	0	2065	2807.67	3213.18	2882.98	3351.18	0
Cam	Calmodulin	FBtr0304963	FBgn0000253	5672	GO:0030048,GO:0016056,GO:0005737,GO:0016061,GO:0005654,GO:0031476,GO:0007099,GO:0016060,GO:0031475,GO:0016028,GO:0016059,GO:0030496,GO:0005886,GO:0016062,GO:0007608,GO:0070855,GO:0097431,GO:0046716,GO:0005509,GO:0051383,GO:2001020,GO:0005515,GO:0031489,GO:0072686,GO:0046331,GO:0006468,GO:0042052,GO:0032036,GO:0005829,GO:0005819,GO:2001259,GO:0005813,GO:0035071,GO:0005814,GO:0072499,GO:0007605		121.88	128.46	146.07	324.72	150.98	216.33	269.97	202.6	66.78	199.31		177.29	1082.28	833.84	881.9	181.72	275.49	390.3	312.46	794.86	694.57	855.07	545.42	392.75	1004.56	788.64	399.53	315.92	132.4	160.35	132.15	165.08	177.8	405.09	327.77	302.67	870.93	277.4	194.16	307	250.6	373.24	208
Cam	Calmodulin	FBtr0304964	FBgn0000253	3406	GO:0030048,GO:0016056,GO:0005737,GO:0016061,GO:0005654,GO:0031476,GO:0007099,GO:0016060,GO:0031475,GO:0016028,GO:0016059,GO:0030496,GO:0005886,GO:0016062,GO:0007608,GO:0070855,GO:0097431,GO:0046716,GO:0005509,GO:0051383,GO:2001020,GO:0005515,GO:0031489,GO:0072686,GO:0046331,GO:0006468,GO:0042052,GO:0032036,GO:0005829,GO:0005819,GO:2001259,GO:0005813,GO:0035071,GO:0005814,GO:0072499,GO:0007605		786.51	951.47	913.48	789.94	538.6	1127.68	1009.03	1437.34	607.81	992.97		199.8	2768.63	3086.66	2026.15	405.31	415.73	2040.86	825.37	2558.13	1857.1	1629.58	1905.17	1363.34	803.58	3390.6	2336.34	635.3	668.65	647.62	741.12	473.81	454.88	851.76	2768.21	460.5	2131.03	208.66	132.2	179.75	170.3	349.52	726.86
Cam	Calmodulin	FBtr0345018	FBgn0000253	1435	GO:0030048,GO:0016056,GO:0005737,GO:0016061,GO:0005654,GO:0031476,GO:0007099,GO:0016060,GO:0031475,GO:0016028,GO:0016059,GO:0030496,GO:0005886,GO:0016062,GO:0007608,GO:0070855,GO:0097431,GO:0046716,GO:0005509,GO:0051383,GO:2001020,GO:0005515,GO:0031489,GO:0072686,GO:0046331,GO:0006468,GO:0042052,GO:0032036,GO:0005829,GO:0005819,GO:2001259,GO:0005813,GO:0035071,GO:0005814,GO:0072499,GO:0007605		1059.27	1105.32	1112	1570.1	396.09	1475.59	2032.82	1573.53	768.13	1321.6		480.68	4228.34	2268.41	2974.64	855.8	852.04	2752.36	1418.67	7180.51	2822.96	1859.48	1045.78	4623.88	964.57	7200.3	1588.64	876.14	948.79	1075.98	562.86	564.83	624.26	1275.93	3583.39	584.23	4871.78	18.98	10.09	40.16	58.33	26.88	1781.74
capu	cappuccino	FBtr0077511	FBgn0000256	4305	GO:0005737,GO:0045451,GO:0045010,GO:0007304,GO:0048477,GO:0007316,GO:0003779,GO:0005938,GO:0007015,GO:0008017,GO:0005884,GO:0030029,GO:0007315		7.21	10.16	10.86	4.58	0.91	0	0.05	10.75	9.08	5.51		4.55	2.33	11.89	1.52	6.35	18.78	0.09	6.39	0	2.5	8.38	1.93	5.67	7.7	3.38	0.44	13.21	16.44	9.46	6.06	8.11	7.2	6.12	0	7.83	0	6.7	5.01	3.49	3.7	3.56	0.73
capu	cappuccino	FBtr0077512	FBgn0000256	3629	GO:0005737,GO:0045451,GO:0045010,GO:0007304,GO:0048477,GO:0007316,GO:0003779,GO:0005938,GO:0007015,GO:0008017,GO:0005884,GO:0030029,GO:0007315		0	0	0	0	0	0	0	0	0	0		0	0	0	0	0	0	0	0	0	0	0	0	0	0	0	0	0	0	0	0	0	0	0	0	0	0	0	0	0	0	0	0
capu	cappuccino	FBtr0077513	FBgn0000256	3861	GO:0005737,GO:0045451,GO:0045010,GO:0007304,GO:0048477,GO:0007316,GO:0003779,GO:0005938,GO:0007015,GO:0008017,GO:0005884,GO:0030029,GO:0007315		0	0.32	0	1.08	1.05	0	0	0.22	1.3	0		0.24	0.49	0	0	0.79	0	0	3.59	0.36	22.76	0	1.18	0.04	1.44	0	0	4.32	0	0	0	1.49	0	0.35	0	0.94	0	0	0	0	0.04	0	1.76
capu	cappuccino	FBtr0290077	FBgn0000256	4294	GO:0005737,GO:0045451,GO:0045010,GO:0007304,GO:0048477,GO:0007316,GO:0003779,GO:0005938,GO:0007015,GO:0008017,GO:0005884,GO:0030029,GO:0007315		0	0	0	0	0	0	0	0	0	0		0.57	4.23	0	0	0	0	0	0	0	0	0	0	0	0	0	0	1.57	0	0	0	0	0	0	0	0	0.18	0	0	0	0	0	0
capu	cappuccino	FBtr0290078	FBgn0000256	4537	GO:0005737,GO:0045451,GO:0045010,GO:0007304,GO:0048477,GO:0007316,GO:0003779,GO:0005938,GO:0007015,GO:0008017,GO:0005884,GO:0030029,GO:0007315		2.46	3.64	1.96	0	0	0	3.65	3.1	0.41	1.82		2.81	5.29	0	8.71	2.85	0.86	0	0.15	0	7.55	13.98	0	2.41	2.4	0.29	0	1.27	5.18	2.25	1.59	2.41	3.71	0.05	0	0.75	0.31	0	1.12	0	0.46	0	0.12
capu	cappuccino	FBtr0290079	FBgn0000256	3059	GO:0005737,GO:0045451,GO:0045010,GO:0007304,GO:0048477,GO:0007316,GO:0003779,GO:0005938,GO:0007015,GO:0008017,GO:0005884,GO:0030029,GO:0007315		0.13	0.05	0.09	0	0	0	0	0	0	0		0	0	0.16	0	0.06	0	0	0.63	0	0	1.34	15.8	0	0.05	0	0.57	4.59	2.96	1.67	0	0.23	4.5	0	0	0.62	62.32	0	0	0	0	0	0.06
capu	cappuccino	FBtr0290080	FBgn0000256	3713	GO:0005737,GO:0045451,GO:0045010,GO:0007304,GO:0048477,GO:0007316,GO:0003779,GO:0005938,GO:0007015,GO:0008017,GO:0005884,GO:0030029,GO:0007315		0	0	0	0	0	0	0	0	0	0		0	0	0.62	0	0	0	0	0	0	0	0	0	0	0	0.06	0	0	0	31.29	0	0	0	0	0	0	7.1	0	0	0	0	0	0
capu	cappuccino	FBtr0290081	FBgn0000256	4286	GO:0005737,GO:0045451,GO:0045010,GO:0007304,GO:0048477,GO:0007316,GO:0003779,GO:0005938,GO:0007015,GO:0008017,GO:0005884,GO:0030029,GO:0007315		4.04	1.6	2.81	2.47	0	0	0.36	10.14	0.41	8.62		0.59	0	0	4.25	2.39	7.07	0.1	0.41	0	0	7.85	3.69	0.93	0.16	0	0	0	6.05	0	22.05	6.26	2.68	4.31	0	13.71	0	0	0	0	0	0	0
capu	cappuccino	FBtr0290082	FBgn0000256	3721	GO:0005737,GO:0045451,GO:0045010,GO:0007304,GO:0048477,GO:0007316,GO:0003779,GO:0005938,GO:0007015,GO:0008017,GO:0005884,GO:0030029,GO:0007315		0	0	0	0	0	0	0	0	0	0		0	0	0	0	0	0	0	0	0	0	0	0	0	0	0	0	0	0	0	0	0	0	0	0	0	0	0	0	0	0	0	0
car	carnation	FBtr0074727	FBgn0000257	3173	GO:0016020,GO:0031396,GO:0005764,GO:0007220,GO:0006904,GO:0008333,GO:0016197,GO:0008593,GO:0030897,GO:0000149,GO:0046907,GO:0009267,GO:0008057,GO:0097352,GO:0005515,GO:0006622,GO:0006727,GO:0033263,GO:0016192,GO:0005829,GO:0006897,GO:0035542,GO:0048072,GO:0008340,GO:0045746,GO:0019905,GO:0007032		0	0	0	0	0	0	0	0	0	0		0	0	0	0	0	0	0	0	0	0	0	0	0	0	0	0	0	0	0	0	0	0	0	0	0	0	0	0	0	0	0	0
car	carnation	FBtr0074728	FBgn0000257	3097	GO:0016020,GO:0031396,GO:0005764,GO:0007220,GO:0006904,GO:0008333,GO:0016197,GO:0008593,GO:0030897,GO:0000149,GO:0046907,GO:0009267,GO:0008057,GO:0097352,GO:0005515,GO:0006622,GO:0006727,GO:0033263,GO:0016192,GO:0005829,GO:0006897,GO:0035542,GO:0048072,GO:0008340,GO:0045746,GO:0019905,GO:0007032		2.75	4.12	5.35	0.13	0.4	0.48	1.92	1.26	0.26	2.73		1.31	1.91	0	0	0.98	3.26	0.31	0.17	0.08	1.77	0.52	0.55	0.72	6.08	0	0	0.22	1.29	14.83	0.72	10.72	0.12	7.09	0.19	1.79	0.08	4.9	6.39	15.58	19.73	13.67	1.35
car	carnation	FBtr0331158	FBgn0000257	3173	GO:0016020,GO:0031396,GO:0005764,GO:0007220,GO:0006904,GO:0008333,GO:0016197,GO:0008593,GO:0030897,GO:0000149,GO:0046907,GO:0009267,GO:0008057,GO:0097352,GO:0005515,GO:0006622,GO:0006727,GO:0033263,GO:0016192,GO:0005829,GO:0006897,GO:0035542,GO:0048072,GO:0008340,GO:0045746,GO:0019905,GO:0007032		0	0	0	0	0	0	0	0	0	0		0	0	0	0	0	0	0	0	0	0	0	0	0	0	0	0	0	0	0	0	0	0	0	0	0	0	0	0	0	0	0	0
CkIIbeta	Casein kinase II beta subunit	FBtr0073558	FBgn0000259	3121	GO:0005737,GO:0004672,GO:0007622,GO:0060810,GO:0004674,GO:0009267,GO:0016319,GO:0005956,GO:0008062,GO:0005829,GO:0045475,GO:0007623,GO:0006468,GO:0007310,GO:0019887,GO:0005634		6.5	8.17	19.24	43.56	4.42	2.84	0	6.38	1.45	22.44		5.76	4.29	16.94	0	3.53	2.81	0	1.02	4.29	0	62.21	33.32	4.35	58.6	43.18	0.26	12.24	4.32	1.66	3.55	5.66	9.63	22.08	0.74	4.68	100.75	0	0	0	0	1.41	3.75
CkIIbeta	Casein kinase II beta subunit	FBtr0073560	FBgn0000259	1331	GO:0005737,GO:0004672,GO:0007622,GO:0060810,GO:0004674,GO:0009267,GO:0016319,GO:0005956,GO:0008062,GO:0005829,GO:0045475,GO:0007623,GO:0006468,GO:0007310,GO:0019887,GO:0005634		0	0.01	0	0	0	0	0	0	0	0		0	0	0	0	0.43	0.87	20.85	0	0	0	0	0	0	12.79	0	0	0	0	0	5.21	0	0	0	0	0	0	1.97	2.02	2.4	4.34	0	0
CkIIbeta	Casein kinase II beta subunit	FBtr0073561	FBgn0000259	966	GO:0005737,GO:0004672,GO:0007622,GO:0060810,GO:0004674,GO:0009267,GO:0016319,GO:0005956,GO:0008062,GO:0005829,GO:0045475,GO:0007623,GO:0006468,GO:0007310,GO:0019887,GO:0005634		0	3.94	0.7	0	0	10.12	0	0	0	0		2.51	0	0	0	0	0	0	0	0	0	0	2.26	0	0	16.54	85.38	0	0	0	7.4	0	0	0	0	3.43	0	0	0	8.08	37.63	0	0
CkIIbeta	Casein kinase II beta subunit	FBtr0073562	FBgn0000259	2392	GO:0005737,GO:0004672,GO:0007622,GO:0060810,GO:0004674,GO:0009267,GO:0016319,GO:0005956,GO:0008062,GO:0005829,GO:0045475,GO:0007623,GO:0006468,GO:0007310,GO:0019887,GO:0005634		98.49	125.13	172.39	95.41	7.4	49.18	131.31	126.89	61.38	92.75		60.47	245.63	205.61	227.71	49.15	170.98	88.08	63.54	131.59	308.51	186.11	200.66	224.7	288.27	249.69	174.68	91.24	78.02	123.86	24.38	56.17	91.88	213.56	44.06	150.11	308.28	12.46	21.83	31.38	30.63	18.66	47.44
CkIIbeta	Casein kinase II beta subunit	FBtr0100540	FBgn0000259	1043	GO:0005737,GO:0004672,GO:0007622,GO:0060810,GO:0004674,GO:0009267,GO:0016319,GO:0005956,GO:0008062,GO:0005829,GO:0045475,GO:0007623,GO:0006468,GO:0007310,GO:0019887,GO:0005634		5.41	4.91	0	0	0	0	0	0.61	0	0.45		2.32	0	0	0	0	0	0	0	0	7.89	1.05	0.32	2.5	0	0	0	0.52	0	0	0	0	0	2.2	0	0	0	0	0	0	0	0	0
CkIIbeta	Casein kinase II beta subunit	FBtr0299569	FBgn0000259	997	GO:0005737,GO:0004672,GO:0007622,GO:0060810,GO:0004674,GO:0009267,GO:0016319,GO:0005956,GO:0008062,GO:0005829,GO:0045475,GO:0007623,GO:0006468,GO:0007310,GO:0019887,GO:0005634		4.96	7.11	0.96	0.43	0	0	0	3.04	2.02	0		3.9	0	0	0	1.02	5.26	0	0	0	0	0.39	2.47	4.38	3	0	0	0.29	3.04	0	0	1.35	0	36.62	1.17	7.02	0	0	0	0	0	0	0
CkIIbeta	Casein kinase II beta subunit	FBtr0307896	FBgn0000259	2376	GO:0005737,GO:0004672,GO:0007622,GO:0060810,GO:0004674,GO:0009267,GO:0016319,GO:0005956,GO:0008062,GO:0005829,GO:0045475,GO:0007623,GO:0006468,GO:0007310,GO:0019887,GO:0005634		21.77	32.84	12.46	42.15	89.23	6.68	25.99	25.31	13.93	17.1		12.91	64.41	696.79	136.68	71.99	21.19	58.68	39.33	61.94	47.45	30.56	54.32	67.89	0	198.04	60.2	78.82	23.97	47.59	28.22	29.05	39.62	16.49	111.99	101.18	1085.51	7.3	6	3.39	10.14	6.39	97.07
CkIIbeta	Casein kinase II beta subunit	FBtr0308084	FBgn0000259	1600	GO:0005737,GO:0004672,GO:0007622,GO:0060810,GO:0004674,GO:0009267,GO:0016319,GO:0005956,GO:0008062,GO:0005829,GO:0045475,GO:0007623,GO:0006468,GO:0007310,GO:0019887,GO:0005634		7.09	10.1	15.64	1.32	0	0	7.99	80.33	1.57	13.2		8.04	0	3.1	0.17	0	0.39	0	0.55	2	29.42	34.65	47.82	18.61	15.85	28.41	0	20.18	2.77	0.63	0	24.26	26.92	48.24	4.62	15.53	0	0.43	3.73	0	1.3	0.91	0
CkIIbeta	Casein kinase II beta subunit	FBtr0308085	FBgn0000259	934	GO:0005737,GO:0004672,GO:0007622,GO:0060810,GO:0004674,GO:0009267,GO:0016319,GO:0005956,GO:0008062,GO:0005829,GO:0045475,GO:0007623,GO:0006468,GO:0007310,GO:0019887,GO:0005634		0	0	0	0	0	83.59	0	0	62.25	2.17		0	0	0	0	0	0	0	0	0	0	0	0	0	0	0	0	6.68	107.28	31.82	0	0	0	0	0	2.99	0	0	0	0	0	0	0
CkIIbeta	Casein kinase II beta subunit	FBtr0333204	FBgn0000259	2006	GO:0005737,GO:0004672,GO:0007622,GO:0060810,GO:0004674,GO:0009267,GO:0016319,GO:0005956,GO:0008062,GO:0005829,GO:0045475,GO:0007623,GO:0006468,GO:0007310,GO:0019887,GO:0005634		0	0	0	0	0	0	0	0	0	4.34		0.74	0	0	0	0	0	0	0	0	0.61	0	0	0	0	0	0	0	0	0	0	0	0	0	0	0.15	0	0.33	0	0.58	0	1.24	0.12
Cat	Catalase	FBtr0075058	FBgn0000261	1993	GO:0055114,GO:0003007,GO:0016209,GO:0005739,GO:0036335,GO:0007568,GO:0034976,GO:0045471,GO:0038001,GO:0020037,GO:0072593,GO:0042744,GO:0005777,GO:0004096,GO:0035206,GO:0042542,GO:0008340		20.62	14.23	33.61	0.91	0	5.57	0.23	7.83	14.77	3.94		15.37	2.29	0	0	5.16	14.85	0.36	2.17	0	28.93	2.74	6.45	8.7	4.69	0	25.09	18.29	4.32	2.22	22.43	14.78	1.03	2.6	0	10.83	0	5.37	19.5	15.54	15.12	1.73	5.62
Pka-C1	Protein kinase, cAMP-dependent, catalytic subunit 1	FBtr0079851	FBgn0000273	5114	GO:0030425,GO:0008359,GO:0005737,GO:0007448,GO:0007622,GO:0045187,GO:0019933,GO:0004691,GO:0045475,GO:0005524,GO:0048477,GO:0045879,GO:0005886,GO:0048149,GO:0007228,GO:0048749,GO:0007612,GO:0008355,GO:0007317,GO:0007613,GO:0004674,GO:0048682,GO:0005515,GO:0006468,GO:0007476,GO:0040040,GO:0007615,GO:0050804,GO:0007611,GO:0008103,GO:0005952,GO:0007480,GO:0044297,GO:0007314,GO:0042981		1620.18	1982.32	1656.13	1059.17	823.21	1142.7	1312.38	1330.3	635.68	905.94		165.32	597.24	498.63	495.6	194.37	98.47	297.11	224.04	402.73	207.71	452.11	523.22	223.73	487.44	854.73	396.62	144.44	138.27	134.68	110.38	105.1	257.55	392.63	502.49	486.39	820.46	46.45	38.27	48.52	74.92	58.85	234.4
Pka-C1	Protein kinase, cAMP-dependent, catalytic subunit 1	FBtr0079852	FBgn0000273	5312	GO:0030425,GO:0008359,GO:0005737,GO:0007448,GO:0007622,GO:0045187,GO:0019933,GO:0004691,GO:0045475,GO:0005524,GO:0048477,GO:0045879,GO:0005886,GO:0048149,GO:0007228,GO:0048749,GO:0007612,GO:0008355,GO:0007317,GO:0007613,GO:0004674,GO:0048682,GO:0005515,GO:0006468,GO:0007476,GO:0040040,GO:0007615,GO:0050804,GO:0007611,GO:0008103,GO:0005952,GO:0007480,GO:0044297,GO:0007314,GO:0042981		201.51	155.59	229.67	139.08	161.77	36.57	107.55	238.04	128.84	252.15		18.99	71.97	102.79	17.63	28.64	16.19	13.47	7.36	5.17	167.5	31.45	16.68	242.07	140.62	212.16	36.78	10.4	3.02	2.51	24.45	108.1	25.95	34.5	8.23	50.6	232.13	1.17	2.01	2.95	4.13	0.55	22.65
Pka-C1	Protein kinase, cAMP-dependent, catalytic subunit 1	FBtr0335495	FBgn0000273	4480	GO:0030425,GO:0008359,GO:0005737,GO:0007448,GO:0007622,GO:0045187,GO:0019933,GO:0004691,GO:0045475,GO:0005524,GO:0048477,GO:0045879,GO:0005886,GO:0048149,GO:0007228,GO:0048749,GO:0007612,GO:0008355,GO:0007317,GO:0007613,GO:0004674,GO:0048682,GO:0005515,GO:0006468,GO:0007476,GO:0040040,GO:0007615,GO:0050804,GO:0007611,GO:0008103,GO:0005952,GO:0007480,GO:0044297,GO:0007314,GO:0042981		113.27	110.85	217.5	300.89	32.19	391.32	145.59	228.34	102.64	183.79		17.63	10.71	6.13	0.31	59.98	5.96	2.34	50.56	14.4	48.43	55.38	26.73	26.43	140.98	16.21	49.04	68.22	73.26	123.79	65.29	67.16	21.55	37.76	15.32	67.11	5.84	2.88	3.9	10.28	20.92	2.83	17.45
Pka-C2	Protein kinase, cAMP-dependent, catalytic subunit 2	FBtr0085727	FBgn0000274	1349	GO:0004691,GO:0018105,GO:0005524,GO:0034237,GO:0004674,GO:0006468,GO:0031588,GO:0005952		0	0	0	0	0	0	0	0	0	0		0	0	0	0	0	0	0	0	0	0	0	0	0	0	0	0	0	0	0	0	0	0	0	0	0	0	0	0	0	0	0	0
Pka-C2	Protein kinase, cAMP-dependent, catalytic subunit 2	FBtr0335454	FBgn0000274	1346	GO:0004691,GO:0018105,GO:0005524,GO:0034237,GO:0004674,GO:0006468,GO:0031588,GO:0005952		0	0	0	0	0	0	0	0	0	0		0	0	0	0	0	0.1	0	0	0	0	0	0	0	0	0	0	0	0	0	0	0	0	0	0	0	0	0	0	0	0	0	0
CecA1	Cecropin A1	FBtr0085612	FBgn0000276	339	GO:0019731,GO:0050829,GO:0050830,GO:0005615,GO:0006959,GO:0009617		0	0	0	0	0	0	0	0	0	0		0.8	0	0	0	0	0	0	0	0	35.54	0	0	0	0	0	0	0	0	0	0	0	0	0	0	0	0	0	0	0	0	0	0
CecA2	Cecropin A2	FBtr0085614	FBgn0000277	355	GO:0019731,GO:0050829,GO:0050830,GO:0005615,GO:0006959		0	0	0	0	0	0	0	0	0	0		2.15	0	0	0	0	0	0	0	0	83.65	0	0	0	0	0	0	0	0	0	0	0	0	0	0	0	0	0	0	0	0	0	0
CecB	Cecropin B	FBtr0085640	FBgn0000278	425	GO:0019731,GO:0050829,GO:0005576,GO:0050830,GO:0005615,GO:0006959,GO:0042742,GO:0048102,GO:0035071		0	0	0	0	0	0	0	0	0	0		2.23	0	0	0	0	0	0	0	0	0	0	0	0	0	0	0	0	0	0	0	0	0	0	0	0	0	0	0	0	0	0	0
CecC	Cecropin C	FBtr0085616	FBgn0000279	386	GO:0019731,GO:0050829,GO:0005576,GO:0050830,GO:0005615,GO:0006959,GO:0042742		0	0	0	0	0	0	0	0	0	0		0.3	0	0	0	0	0	0	0	0	0	10.01	0	0	0	0	0	0	0	0	0	0	0	0	0	0	0	0	0	0	0	0	0
Cec-Psi1	Cecropin pseudogene 1	FBtr0085613	FBgn0000280	166			0	0	0	0	0	0	0	0	0	0		0	0	0	0	0	0	0	0	0	0	0	0	0	0	0	0	0	0	0	0	0	0	0	0	0	0	0	0	0	0	0	0
Cec2	Cecropin 2	FBtr0089614	FBgn0000281	201			0	0	0	0	0	0	0	0	0	0		0	0	0	0	0	0	0	0	0	0	0	0	0	0	0	0	0	0	0	0	0	0	0	0	0	0	0	0	0	0	0	0
Cp190	Centrosomal protein 190kD	FBtr0083126	FBgn0000283	4114	GO:0031208,GO:0051493,GO:0003677,GO:0005700,GO:0031937,GO:0035191,GO:0003682,GO:0008017,GO:0005704,GO:0007017,GO:0000793,GO:0090202,GO:0010468,GO:0005875,GO:0042803,GO:0043035,GO:0000242,GO:0005515,GO:0006357,GO:0005876,GO:0005634,GO:0005813		82.77	85.55	62.55	57.41	18.71	44.76	19.09	108.44	53.54	59.56		17.35	9.66	60.52	3.86	66.64	42.94	4.87	10.7	14.84	21.93	45.95	44.48	44.32	83.9	56.82	21.4	33.98	6.33	10.88	13.12	38.83	15.12	37.32	57.01	48.97	45.73	1.39	2.89	0.15	1.05	4.52	10.47
Cp190	Centrosomal protein 190kD	FBtr0083127	FBgn0000283	4176	GO:0031208,GO:0051493,GO:0003677,GO:0005700,GO:0031937,GO:0035191,GO:0003682,GO:0008017,GO:0005704,GO:0007017,GO:0000793,GO:0090202,GO:0010468,GO:0005875,GO:0042803,GO:0043035,GO:0000242,GO:0005515,GO:0006357,GO:0005876,GO:0005634,GO:0005813		2.39	6.11	16.26	0	0	0	0	1.75	0	6.25		3.99	0	0	3.39	3.98	3.73	0	0	0	0	0	0	0.94	0	0	0	0	51.61	0	0	0	12.18	0.88	0	0.99	0	0	0.38	0	0	0	0
Cf2	Chorion factor 2	FBtr0089647	FBgn0000286	3703	GO:0001077,GO:0032968,GO:0007527,GO:0043565,GO:0005634		13.38	20.24	30.76	2.77	0	28.23	2.79	22.07	6.23	11.75		4.84	0	10.92	0	1.52	0.34	0	2.88	12	0	22.82	18.6	16.95	43	6.72	2.28	3.4	3.53	0	8.25	1.93	8.78	4.12	0	4.19	46.91	0.53	0	1.96	0	0.24	3.59
Cf2	Chorion factor 2	FBtr0089648	FBgn0000286	3679	GO:0001077,GO:0032968,GO:0007527,GO:0043565,GO:0005634		12.43	0	0	15.02	0	0	0	0	0	0		0	0	0	0	0	0	0	15.62	0	2.53	0.38	6.7	0	0	0	0	2.16	21.2	0	0	0	4.79	0	0	0	0	0	0	0	3	0	1.74
Cf2	Chorion factor 2	FBtr0089649	FBgn0000286	3763	GO:0001077,GO:0032968,GO:0007527,GO:0043565,GO:0005634		23.95	16.58	25.77	2.38	0	10.07	35.51	38.82	15.41	21.22		15.19	2.05	183.68	3.19	82.46	18.49	2.81	0	22.49	0	33.03	34.85	19.61	89.89	73.54	3.1	50.11	4.37	6.23	28.37	19	4.08	15.11	0	30.99	4.76	0.26	2.16	0	0	7.53	1.97
Cf2	Chorion factor 2	FBtr0304887	FBgn0000286	4231	GO:0001077,GO:0032968,GO:0007527,GO:0043565,GO:0005634		12.5	19.12	13.77	15.22	3.32	0.14	2.22	15.04	2.69	28.86		3.07	1.95	63.17	0	12.22	2.62	9.44	6.95	8.75	0.2	10.03	22.12	3.84	43.55	26.66	0	30.58	0.81	35.04	0.74	3.75	8.9	7.87	0	7.09	10.42	0.28	0	0	0	0.77	0.89
Cf2	Chorion factor 2	FBtr0336835	FBgn0000286	3576	GO:0001077,GO:0032968,GO:0007527,GO:0043565,GO:0005634		9.15	1.97	8.53	45.38	58.23	0	15.43	11.15	23.98	8.09		0	95.52	182.36	43.48	0	0	15.03	0	9.95	200.39	17.18	0	0	0	0	30.81	0	0	0	0	6.13	15.41	0	46.89	0.95	0	0	0	0	0	0	34.94
Cf2	Chorion factor 2	FBtr0472669	FBgn0000286	3703	GO:0001077,GO:0032968,GO:0007527,GO:0043565,GO:0005634		13.38	20.24	30.76	2.77	0	28.23	2.79	22.07	6.23	11.75		4.84	0	10.92	0	1.52	0.34	0	2.88	12	0	22.82	18.6	16.95	43	6.72	2.28	3.4	3.53	0	8.25	1.93	8.78	4.12	0	4.19	46.91	0.53	0	1.96	0	0.24	3.59
salr	spalt-related	FBtr0080235	FBgn0000287	4142	GO:0008584,GO:0007165,GO:0000977,GO:0000122,GO:0030539,GO:0008586,GO:0043565,GO:0044212,GO:0003700,GO:0006355,GO:0048098,GO:0005634,GO:0006366,GO:0007605,GO:0007423		0	0	0	0	0	0	0	0	0	0		0	0.03	0	0	0	0	0	0.09	0	0	0	0	0.13	0	0	0	0	0.03	0	0	0	0	0	0	0	0.94	0	0	0	0	0	0
salr	spalt-related	FBtr0080236	FBgn0000287	4408	GO:0008584,GO:0007165,GO:0000977,GO:0000122,GO:0030539,GO:0008586,GO:0043565,GO:0044212,GO:0003700,GO:0006355,GO:0048098,GO:0005634,GO:0006366,GO:0007605,GO:0007423		0	0	0	0	0	0	0	0	0	0		0	0	0	0	0	0	0	0	0	0	0	0	0	0	0	0	0	0	0	0	0	0	0	0	0	0	0	0	0	0	0	0
salr	spalt-related	FBtr0307093	FBgn0000287	5189	GO:0008584,GO:0007165,GO:0000977,GO:0000122,GO:0030539,GO:0008586,GO:0043565,GO:0044212,GO:0003700,GO:0006355,GO:0048098,GO:0005634,GO:0006366,GO:0007605,GO:0007423		0	0	0	0	0	0	0	0	0	0.05		1.26	0	0	0	0	0	0	0.08	0	0	0	0	0.01	0.03	0	0	0	0	0	0	0	0.04	0	0	0.22	0	0	0	0	0	0	0.48
cg	combgap	FBtr0087526	FBgn0000289	3058	GO:0006351,GO:0003676,GO:0046983,GO:0003700,GO:0007476,GO:0005634		0	0	0	0	0	0	0	0	23.85	0		0	0	0	0	0	0	0	0	0	0	0	0	0	0	0	0	0	0	0	0	0	0	0	0	0	0	0	0	0	0	0	0
cg	combgap	FBtr0087527	FBgn0000289	3361	GO:0006351,GO:0003676,GO:0046983,GO:0003700,GO:0007476,GO:0005634		0	0	0	0	0	0	0	0	0	0		0	0	0	0	0	0	0	0	0	0	0	0	0	0	0	0	0	0	0	0	0	0	0	0	0	0	0	0	0	0	0	0
cg	combgap	FBtr0087528	FBgn0000289	2866	GO:0006351,GO:0003676,GO:0046983,GO:0003700,GO:0007476,GO:0005634		18.9	27.85	8.78	24.02	0	18.34	17.79	56.55	33.16	19.82		3.98	0	0	155.74	16.88	140.48	1.34	2.05	0	0.45	14.48	1.38	5.65	6.13	0.19	1.02	6.93	3.64	0	10.49	0	1.21	28.95	0	9.88	21.89	0.1	10.6	0	4.48	1.91	16.27
cg	combgap	FBtr0087529	FBgn0000289	2881	GO:0006351,GO:0003676,GO:0046983,GO:0003700,GO:0007476,GO:0005634		0	0	0	0	0	0	0	0	0	0		0	1.54	0	0	0	0	0	0	0	0	0	0.77	0	0	0	0	0	0	0	0	0	0	0	0	0	0	0	0	0	0	0	0
cg	combgap	FBtr0112795	FBgn0000289	5066	GO:0006351,GO:0003676,GO:0046983,GO:0003700,GO:0007476,GO:0005634		54.47	61.74	34.31	102.18	19.34	22.79	0	52.21	22.91	58.72		10.27	0	154.94	0	81.2	51.56	0	17.05	0	0	72.92	28.29	4.43	156.44	2.39	0	25.06	53.8	2.81	0	38.49	24.67	45.06	0	44.54	0	0	0	0	0	0	0
cg	combgap	FBtr0290034	FBgn0000289	3364	GO:0006351,GO:0003676,GO:0046983,GO:0003700,GO:0007476,GO:0005634		0	0	0	4.16	0	0	0	0	0	0		0	0	0	0	0	0	0	0	0	0	0	0	0	0	0	0	0	0	0	0	6.09	0	0	0	0	0	0	0	0	0	0	0
cg	combgap	FBtr0290035	FBgn0000289	4692	GO:0006351,GO:0003676,GO:0046983,GO:0003700,GO:0007476,GO:0005634		13.42	20.46	0.86	0	0	0	0	46.68	33.09	6.08		0.98	0	2.31	0.52	11.94	0	0	0	0	0	0	0	6.11	0	0	171.58	10.52	0	1.52	30.32	0	5.73	0	0	0	0	0	0	0	0	0	0
cg	combgap	FBtr0339960	FBgn0000289	3040	GO:0006351,GO:0003676,GO:0046983,GO:0003700,GO:0007476,GO:0005634		22.27	29.22	64.84	7.33	334.71	0.53	3.32	100.62	53.95	25.58		7.42	0	38.99	0	44.59	111.58	0	33.35	12.15	0	41.29	114.62	4.34	32.18	0	0.29	18.38	23.64	6.74	56.74	28.06	38.94	16.92	3.75	31.63	26.73	0	4.75	0	1.2	0	0
cg	combgap	FBtr0339961	FBgn0000289	4728	GO:0006351,GO:0003676,GO:0046983,GO:0003700,GO:0007476,GO:0005634		0	7.33	3.93	0	0	0	0	13.94	0	7.12		1.13	0	1.13	0	0	7.11	0	0	0	0	0	3.61	0	0	0.7	0	2.53	0.83	0	0	0	0	4.53	0	0.49	0	0	0	0	0	0	0
cg	combgap	FBtr0339962	FBgn0000289	3385	GO:0006351,GO:0003676,GO:0046983,GO:0003700,GO:0007476,GO:0005634		0	0	0	0	0	0	0	0	0	0		0.58	0	53.65	0	0	0	0	0	0	0	0	0	0	0	0	0	0	0	0	0	0	0	0	0	0	0	0	0	0	0	0	0
cg	combgap	FBtr0346946	FBgn0000289	4814	GO:0006351,GO:0003676,GO:0046983,GO:0003700,GO:0007476,GO:0005634		92.53	59.41	135.38	0	29.53	54.42	174.58	113.02	71.11	62.69		24	17.75	3.4	34.62	10.49	24.19	21.99	11.03	9.12	18.76	29.67	29.96	59.76	20.02	126.21	12.86	37.14	88.28	97.45	97.66	15.18	57	5.57	154.13	36.26	9.2	4.54	3.7	7.99	9.93	5.38	14.7
Col4a1	Collagen type IV alpha 1	FBtr0079001	FBgn0000299	5635	GO:0007391,GO:0005581,GO:0005604,GO:0055013,GO:0048621,GO:0005587,GO:0035848,GO:0060729,GO:0005201		0	1.55	0	0	0	0	0	0.53	0	0.82		83.61	0	0	0	0.48	0	48.35	0.29	0.22	61.83	0	0	0	0	0.09	4.02	0.3	0	0	0.25	0.32	22.28	24.19	0.07	2.3	0.04	0	0	0	1.12	0	0
Col4a1	Collagen type IV alpha 1	FBtr0079002	FBgn0000299	6101	GO:0007391,GO:0005581,GO:0005604,GO:0055013,GO:0048621,GO:0005587,GO:0035848,GO:0060729,GO:0005201		0	0	0	0	0	0	0	0	0	0		26.31	0	0	0.21	0	0	1.3	0	0	39.3	0	0	7.31	0	0	0	0	0	0	0	0	7.27	0	0	0	0	0	0	0	0	0	0
Col4a1	Collagen type IV alpha 1	FBtr0079003	FBgn0000299	6000	GO:0007391,GO:0005581,GO:0005604,GO:0055013,GO:0048621,GO:0005587,GO:0035848,GO:0060729,GO:0005201		0.25	0	0	0	0	0	0	0	0	0		19.55	0.07	0	0	0	0	0.08	0	0	0	0.99	0.34	17.56	0.09	0	0	0	0	0	0	0	2.17	0.07	0	0.8	0	0	0	0	5.06	0	0
ChAT	Choline acetyltransferase	FBtr0089367	FBgn0000303	4011	GO:0008292,GO:0004102,GO:0007274,GO:0005829,GO:0005634		23.56	26.15	46.95	62.36	58.81	79.88	22.05	18.3	10.55	17.37		17.84	2.74	2.37	29.37	2.22	0.29	2.05	2.5	0.81	3.71	0.95	3.84	35.53	3.95	2.58	3.25	0.23	0.48	0	0	0.03	4.91	8.73	2.8	5.51	1.49	6.23	3.34	5.45	4.18	5.61	0.17
ChAT	Choline acetyltransferase	FBtr0089368	FBgn0000303	2824	GO:0008292,GO:0004102,GO:0007274,GO:0005829,GO:0005634		7.47	7.98	0	0	0	13.82	114.96	34.11	0	5.83		5.93	0	0	0	1.85	0.28	0	0	0	0	0	0	2.91	0	0	44.02	0.26	0	0.06	0	0	0.32	0	0	0	0	0	5.51	0	4.31	0	0
chif	chiffon	FBtr0080838	FBgn0000307	6624	GO:0031431,GO:0007304,GO:0030295,GO:0046716,GO:0003676,GO:0007306,GO:0045740,GO:0007307,GO:0045860,GO:0008270,GO:0072499		3.55	3.05	4.43	4.26	5.99	0	0	4.5	10.43	0.84		8.33	0	0.45	5.23	1.58	0.87	0	9.1	0	0.34	2.36	1.3	4.9	0	0	28.33	3.48	8.15	0.21	11.15	9.4	3.51	13.9	0	30.75	0	0.05	0	0	0	1	3.63
chif	chiffon	FBtr0080839	FBgn0000307	6575	GO:0031431,GO:0007304,GO:0030295,GO:0046716,GO:0003676,GO:0007306,GO:0045740,GO:0007307,GO:0045860,GO:0008270,GO:0072499		54.59	67.65	55.89	27.07	62.01	0.88	11.82	58.02	14.95	35.7		6.19	90.5	47.05	16.77	40.35	68.64	3.48	0	23.36	23.71	53.7	17.58	28.5	57.17	27.72	0	26.83	1.22	0	5.24	15.12	21.94	14.5	10.21	36.91	158.26	0	0	0.86	3.61	0	0
chif	chiffon	FBtr0321313	FBgn0000307	6170	GO:0031431,GO:0007304,GO:0030295,GO:0046716,GO:0003676,GO:0007306,GO:0045740,GO:0007307,GO:0045860,GO:0008270,GO:0072499		10.51	8.7	7.38	0	7.43	67.67	41.71	4.66	0	4.23		5.23	0.59	0	0	0.32	0	0.26	6.71	1.27	0	9.66	0	0.12	3.66	8.64	37.75	0	35.42	41.91	50.13	7.17	0	5.22	49.51	0	0	0	0	0	0	0	0
chic	chickadee	FBtr0079233	FBgn0000308	1005	GO:0007391,GO:0005737,GO:0007420,GO:0045451,GO:0048842,GO:0007488,GO:0030041,GO:0042989,GO:0003785,GO:0043005,GO:0016322,GO:0032507,GO:0000902,GO:0007436,GO:0003779,GO:0036098,GO:0005938,GO:0035193,GO:0035019,GO:0007015,GO:0005515,GO:0007411,GO:0000915,GO:0048471,GO:0007283,GO:0000281,GO:0015629,GO:0051491,GO:0042060,GO:0048680,GO:0030717,GO:0007300		190.67	99.98	94.43	0	44.6	0	0	90.4	0	146.32		216.31	389.81	0	0	221.3	100.5	2.21	250.57	85.82	1.45	183.06	394	178.85	62.48	559	41.12	1343.7	5.92	110.41	0	45.29	157.73	339.27	0	100.55	2364.11	97.79	65.61	88.76	94.57	9.98	72.85
chic	chickadee	FBtr0079234	FBgn0000308	1513	GO:0007391,GO:0005737,GO:0007420,GO:0045451,GO:0048842,GO:0007488,GO:0030041,GO:0042989,GO:0003785,GO:0043005,GO:0016322,GO:0032507,GO:0000902,GO:0007436,GO:0003779,GO:0036098,GO:0005938,GO:0035193,GO:0035019,GO:0007015,GO:0005515,GO:0007411,GO:0000915,GO:0048471,GO:0007283,GO:0000281,GO:0015629,GO:0051491,GO:0042060,GO:0048680,GO:0030717,GO:0007300		5.2	22.69	0	0	0	0	46.02	21.38	0	1.07		1.27	0	0	1.4	0.26	0	0	0	0	0	0	0.59	0	0	0	0	27.65	2.37	0	28.29	0	1.19	0	0	15.59	0	0	0	0	0	0	0
chic	chickadee	FBtr0079235	FBgn0000308	1402	GO:0007391,GO:0005737,GO:0007420,GO:0045451,GO:0048842,GO:0007488,GO:0030041,GO:0042989,GO:0003785,GO:0043005,GO:0016322,GO:0032507,GO:0000902,GO:0007436,GO:0003779,GO:0036098,GO:0005938,GO:0035193,GO:0035019,GO:0007015,GO:0005515,GO:0007411,GO:0000915,GO:0048471,GO:0007283,GO:0000281,GO:0015629,GO:0051491,GO:0042060,GO:0048680,GO:0030717,GO:0007300		15.36	19.33	19.06	0	0	0	0	10.09	5.15	15.98		18.27	59.33	0	0	5.63	1.51	0	11.11	18.87	1.16	112.8	126.31	31.75	66.99	3.57	2.16	92.32	0.81	15.15	0	1.5	7.67	61	2.61	44.51	0	38.8	48.8	1.29	64.84	11.7	1.49
chic	chickadee	FBtr0079236	FBgn0000308	2091	GO:0007391,GO:0005737,GO:0007420,GO:0045451,GO:0048842,GO:0007488,GO:0030041,GO:0042989,GO:0003785,GO:0043005,GO:0016322,GO:0032507,GO:0000902,GO:0007436,GO:0003779,GO:0036098,GO:0005938,GO:0035193,GO:0035019,GO:0007015,GO:0005515,GO:0007411,GO:0000915,GO:0048471,GO:0007283,GO:0000281,GO:0015629,GO:0051491,GO:0042060,GO:0048680,GO:0030717,GO:0007300		154.98	248.72	340.68	77.25	0.11	55.3	39.6	109.78	76.84	88.39		71.05	242.24	701.92	180.03	160.04	147.87	268.01	175.08	660.96	974.6	857.14	384.14	315.18	289.74	84.14	9.78	173.38	99.21	66.61	162.91	37.4	99.84	237.86	283.47	202.96	507.79	5.58	0.28	8.27	8.64	8.93	225.64
chic	chickadee	FBtr0309212	FBgn0000308	988	GO:0007391,GO:0005737,GO:0007420,GO:0045451,GO:0048842,GO:0007488,GO:0030041,GO:0042989,GO:0003785,GO:0043005,GO:0016322,GO:0032507,GO:0000902,GO:0007436,GO:0003779,GO:0036098,GO:0005938,GO:0035193,GO:0035019,GO:0007015,GO:0005515,GO:0007411,GO:0000915,GO:0048471,GO:0007283,GO:0000281,GO:0015629,GO:0051491,GO:0042060,GO:0048680,GO:0030717,GO:0007300		12.17	20.91	3.19	0	0	0	0	7.27	20.07	16.98		9.94	0	0	0	0	0	0	9.19	0	0	74.88	0	0.67	3.15	0	0	48.08	0	95.43	0	0	0	0	0	2.89	0	3.7	0	2.29	2.46	0	0
chic	chickadee	FBtr0309213	FBgn0000308	1275	GO:0007391,GO:0005737,GO:0007420,GO:0045451,GO:0048842,GO:0007488,GO:0030041,GO:0042989,GO:0003785,GO:0043005,GO:0016322,GO:0032507,GO:0000902,GO:0007436,GO:0003779,GO:0036098,GO:0005938,GO:0035193,GO:0035019,GO:0007015,GO:0005515,GO:0007411,GO:0000915,GO:0048471,GO:0007283,GO:0000281,GO:0015629,GO:0051491,GO:0042060,GO:0048680,GO:0030717,GO:0007300		0	0	7.21	0	4.78	0	0	0.68	0	0		0	0	0	0	0	0	0	0	0	0	0	2.47	0	0	0	25.98	0	0	0	0	0	0	0	0	0	0	0	0	0	0	0	0
cin	cinnamon	FBtr0070064	FBgn0000316	2054	GO:0032324,GO:0005737,GO:0006777,GO:0061599,GO:0018315,GO:0061598,GO:0001700		7.67	0	14.12	0	0	13.03	0	0	11.92	0		0	0	0	0	7.27	8.8	4.62	0	0	22.89	6.76	0	0	0	0.58	0	0	11.04	0	0.02	6.83	0	0	36.78	0	0	4.15	4.04	9.23	10.78	8.54	0
cin	cinnamon	FBtr0070065	FBgn0000316	2110	GO:0032324,GO:0005737,GO:0006777,GO:0061599,GO:0018315,GO:0061598,GO:0001700		30.44	39.77	15.65	44.14	0.25	0	41.68	35.36	23.56	37.06		9.89	31.92	6.09	237.97	12.24	3.88	0	14.57	15.67	2.79	10.46	31.87	38.92	33.5	0	32.09	8.44	16.78	3.07	18.07	13.78	14.03	23.7	16.21	16.26	196.82	0	0	0	0	0	13.24
ck	crinkled	FBtr0080723	FBgn0000317	7241	GO:0035182,GO:0030048,GO:0008407,GO:0003774,GO:0045180,GO:0005737,GO:0031477,GO:0070825,GO:0016459,GO:0031941,GO:0032027,GO:0005524,GO:0008586,GO:0035293,GO:0016461,GO:0005902,GO:0003779,GO:0045179,GO:0005938,GO:0007015,GO:0045296,GO:0030898,GO:0048800,GO:0042623,GO:0007469,GO:0035317,GO:0007605,GO:0007423,GO:0032529		0	0	0	0	0	0	0	0	0	0		0	0	0	0	0	0	0	0	0	0	0	0	0	0	0	0	0.01	0	0	0	0	0	0.01	0	0	0	0	0	0	0	0	0
ck	crinkled	FBtr0080724	FBgn0000317	7236	GO:0035182,GO:0030048,GO:0008407,GO:0003774,GO:0045180,GO:0005737,GO:0031477,GO:0070825,GO:0016459,GO:0031941,GO:0032027,GO:0005524,GO:0008586,GO:0035293,GO:0016461,GO:0005902,GO:0003779,GO:0045179,GO:0005938,GO:0007015,GO:0045296,GO:0030898,GO:0048800,GO:0042623,GO:0007469,GO:0035317,GO:0007605,GO:0007423,GO:0032529		0	0	0	0	0	0	0	0	0	0		0.28	0.02	0	0	0	0	0	0	0	0	0.28	0	0	0	0	0	0.95	0	0	0	0	0	0.77	0	0	0	0	0	0	0	0	0
ck	crinkled	FBtr0343686	FBgn0000317	7087	GO:0035182,GO:0030048,GO:0008407,GO:0003774,GO:0045180,GO:0005737,GO:0031477,GO:0070825,GO:0016459,GO:0031941,GO:0032027,GO:0005524,GO:0008586,GO:0035293,GO:0016461,GO:0005902,GO:0003779,GO:0045179,GO:0005938,GO:0007015,GO:0045296,GO:0030898,GO:0048800,GO:0042623,GO:0007469,GO:0035317,GO:0007605,GO:0007423,GO:0032529		0	0.77	2.4	0.71	0	0	0	0.18	0	0.13		2.02	0	0	0	0.02	0.03	0.02	0.05	0	0	0	0.14	6.84	0	0	0	0	0	0	0	1.68	1.11	0	0	3.16	0	0	0	0.04	0	0	0
ck	crinkled	FBtr0343687	FBgn0000317	7404	GO:0035182,GO:0030048,GO:0008407,GO:0003774,GO:0045180,GO:0005737,GO:0031477,GO:0070825,GO:0016459,GO:0031941,GO:0032027,GO:0005524,GO:0008586,GO:0035293,GO:0016461,GO:0005902,GO:0003779,GO:0045179,GO:0005938,GO:0007015,GO:0045296,GO:0030898,GO:0048800,GO:0042623,GO:0007469,GO:0035317,GO:0007605,GO:0007423,GO:0032529		0.03	0	0	0	0	0	0	0	0.03	0		0.61	0	0	0	0	0	0	0	0	0	0	0	0	0.52	0	0	0	0	0	0	0	0	0	0	0	0	0	0	0	0	0	0
cl	clot	FBtr0079095	FBgn0000318	615	GO:0006726,GO:0047134,GO:0005829		75.98	103.08	55.91	0.8	4398.2	0.35	46.16	133.39	72.16	41.67		68.66	0.45	0	45.04	37.65	148.55	0.28	2.48	11.47	0.28	38.53	15.69	5.97	50.4	0.58	0.41	266.55	78.04	91.61	91.81	94.08	30.78	19.19	0	63.03	0	134.27	163.42	173.86	241.65	100.47	43.42
cl	clot	FBtr0329967	FBgn0000318	689	GO:0006726,GO:0047134,GO:0005829		0	0	0	0	0	0	0	0	0	0		10.87	0	0	0	0	0	0	0	0	0	0	0	2.79	6.76	0	0	73.68	0	0	0	0	9.44	0	0	4.95	0	0	0	0	0	0	0
cl	clot	FBtr0329968	FBgn0000318	674	GO:0006726,GO:0047134,GO:0005829		1.06	0	0	0	0	0	0	0	0	0		0	0	0	0	0	0	0	0	0	0	0	0	0	0	0	0	0	0	0	0	0	0	0	0	0	0	0	0	0	0	0	0
Chc	Clathrin heavy chain	FBtr0074179	FBgn0000319	5696	GO:0045747,GO:0045451,GO:0030136,GO:0033363,GO:0033227,GO:0030198,GO:0035159,GO:0005886,GO:0048749,GO:0005905,GO:0007291,GO:0005198,GO:0005938,GO:0030130,GO:0040008,GO:0031410,GO:0045807,GO:0005515,GO:0007594,GO:0032051,GO:0048471,GO:0006886,GO:0030141,GO:0030132,GO:0046667,GO:0071439,GO:0016079,GO:0048268,GO:0006897,GO:0008103,GO:0005802,GO:0035002,GO:0007268		8.05	8.54	10.06	12.92	4.11	1.37	34.85	9.53	3.66	5.69		16.12	9.99	3.15	24.48	5.25	14.84	17.74	18.99	6.35	2.45	26.66	9.51	4.97	11.8	2.77	3.23	50.6	18.62	21.55	3.4	33.63	21.32	59.97	30.73	3.47	14.55	0	0	11.78	16.53	0	6.55
Chc	Clathrin heavy chain	FBtr0074180	FBgn0000319	5653	GO:0045747,GO:0045451,GO:0030136,GO:0033363,GO:0033227,GO:0030198,GO:0035159,GO:0005886,GO:0048749,GO:0005905,GO:0007291,GO:0005198,GO:0005938,GO:0030130,GO:0040008,GO:0031410,GO:0045807,GO:0005515,GO:0007594,GO:0032051,GO:0048471,GO:0006886,GO:0030141,GO:0030132,GO:0046667,GO:0071439,GO:0016079,GO:0048268,GO:0006897,GO:0008103,GO:0005802,GO:0035002,GO:0007268		2.53	0	0	2.43	0	0	0	0	0	0		4.15	0	2.47	0	0	0	0	0.69	0.92	0.36	1.07	0.5	3.48	2.73	17.72	0	1.11	0	0	2.8	0	2.35	0	0	2.88	0	0	23.75	7.18	0	0	0
Chc	Clathrin heavy chain	FBtr0074181	FBgn0000319	5734	GO:0045747,GO:0045451,GO:0030136,GO:0033363,GO:0033227,GO:0030198,GO:0035159,GO:0005886,GO:0048749,GO:0005905,GO:0007291,GO:0005198,GO:0005938,GO:0030130,GO:0040008,GO:0031410,GO:0045807,GO:0005515,GO:0007594,GO:0032051,GO:0048471,GO:0006886,GO:0030141,GO:0030132,GO:0046667,GO:0071439,GO:0016079,GO:0048268,GO:0006897,GO:0008103,GO:0005802,GO:0035002,GO:0007268		7.04	0	4.46	0	86.84	0	16.99	15.11	1.49	0.96		1.28	0	0	0	0	1.25	0	0.69	0	0.5	0.93	0.77	0.56	20.31	0	0	2.75	0	0	0.81	0.73	0	3.7	0	0	1.71	0	0	0	17.79	0	0
Chc	Clathrin heavy chain	FBtr0074182	FBgn0000319	5793	GO:0045747,GO:0045451,GO:0030136,GO:0033363,GO:0033227,GO:0030198,GO:0035159,GO:0005886,GO:0048749,GO:0005905,GO:0007291,GO:0005198,GO:0005938,GO:0030130,GO:0040008,GO:0031410,GO:0045807,GO:0005515,GO:0007594,GO:0032051,GO:0048471,GO:0006886,GO:0030141,GO:0030132,GO:0046667,GO:0071439,GO:0016079,GO:0048268,GO:0006897,GO:0008103,GO:0005802,GO:0035002,GO:0007268		1.36	6.04	4.65	2.73	1	0	1.34	4.65	0	5.12		4.89	4.95	0	1.1	5.21	0	0	0	0	2.7	11.42	0	7.51	23.41	0	0	0.73	1.82	0.56	0	0	7.95	0	0	10.94	0	0	0	9.29	0	0	4.45
Chc	Clathrin heavy chain	FBtr0112797	FBgn0000319	5683	GO:0045747,GO:0045451,GO:0030136,GO:0033363,GO:0033227,GO:0030198,GO:0035159,GO:0005886,GO:0048749,GO:0005905,GO:0007291,GO:0005198,GO:0005938,GO:0030130,GO:0040008,GO:0031410,GO:0045807,GO:0005515,GO:0007594,GO:0032051,GO:0048471,GO:0006886,GO:0030141,GO:0030132,GO:0046667,GO:0071439,GO:0016079,GO:0048268,GO:0006897,GO:0008103,GO:0005802,GO:0035002,GO:0007268		0	0	0	0	0	0	0	0	0	0		0	0	0	0	0	0	0	0	0	0	0	0	0.82	0.52	0	0	0	0	0	0	0	0	0	0	0	0	2.54	0	0	0	0	0
Chc	Clathrin heavy chain	FBtr0112798	FBgn0000319	5577	GO:0045747,GO:0045451,GO:0030136,GO:0033363,GO:0033227,GO:0030198,GO:0035159,GO:0005886,GO:0048749,GO:0005905,GO:0007291,GO:0005198,GO:0005938,GO:0030130,GO:0040008,GO:0031410,GO:0045807,GO:0005515,GO:0007594,GO:0032051,GO:0048471,GO:0006886,GO:0030141,GO:0030132,GO:0046667,GO:0071439,GO:0016079,GO:0048268,GO:0006897,GO:0008103,GO:0005802,GO:0035002,GO:0007268		38.06	66.34	44.09	46.36	0	64.6	0	17.77	11.79	35.43		14.89	0	9.64	7.05	29.51	38.05	0	0	0	0	0	0	0	0	7.27	70.98	0	33.38	55.97	21.19	12.27	0.51	0	35.34	24.13	13.26	21.96	2.22	0	12.21	31.82	33.96
Chc	Clathrin heavy chain	FBtr0339445	FBgn0000319	5788	GO:0045747,GO:0045451,GO:0030136,GO:0033363,GO:0033227,GO:0030198,GO:0035159,GO:0005886,GO:0048749,GO:0005905,GO:0007291,GO:0005198,GO:0005938,GO:0030130,GO:0040008,GO:0031410,GO:0045807,GO:0005515,GO:0007594,GO:0032051,GO:0048471,GO:0006886,GO:0030141,GO:0030132,GO:0046667,GO:0071439,GO:0016079,GO:0048268,GO:0006897,GO:0008103,GO:0005802,GO:0035002,GO:0007268		0	0	0	0	0	0	3.21	0.71	0	0.59		1.39	0.84	0	0	0	0	0	0	0	0	0	0	0.16	0	0	0	0	0	0	0	0	0	0	0	0	0	0	0	0	0	0	0
eya	eyes absent	FBtr0079334	FBgn0000320	3320	GO:0005737,GO:0008584,GO:0001744,GO:0030946,GO:0045944,GO:0009996,GO:0007498,GO:0048749,GO:0004725,GO:0006351,GO:0007526,GO:0042675,GO:0008134,GO:0007455,GO:0008406,GO:0004721,GO:0045739,GO:0045087,GO:0007411,GO:0010628,GO:0007280,GO:2001240,GO:0001746,GO:0016576,GO:0009416,GO:0007283,GO:0070285,GO:0006470,GO:0005634,GO:0030707,GO:0007419,GO:0072499,GO:0007435,GO:0042051		0.12	1.67	0	0	0	0	0	0	3	0		0.61	0	0	0	0	0	0	0	0	0	0	0	0	0	0	0	0	0	0	0	0	0	0	0	0	0	0	0	0	0	0	0.03
eya	eyes absent	FBtr0079335	FBgn0000320	3075	GO:0005737,GO:0008584,GO:0001744,GO:0030946,GO:0045944,GO:0009996,GO:0007498,GO:0048749,GO:0004725,GO:0006351,GO:0007526,GO:0042675,GO:0008134,GO:0007455,GO:0008406,GO:0004721,GO:0045739,GO:0045087,GO:0007411,GO:0010628,GO:0007280,GO:2001240,GO:0001746,GO:0016576,GO:0009416,GO:0007283,GO:0070285,GO:0006470,GO:0005634,GO:0030707,GO:0007419,GO:0072499,GO:0007435,GO:0042051		0	0	0	0	0	0	0	0	0	0		0	0	0	0	0	0	0	0	0	0	0	0	0	0	0	0	0	0	0	0	0	0	0	0	0	0	0	0	0	0	0	0
eya	eyes absent	FBtr0306113	FBgn0000320	2832	GO:0005737,GO:0008584,GO:0001744,GO:0030946,GO:0045944,GO:0009996,GO:0007498,GO:0048749,GO:0004725,GO:0006351,GO:0007526,GO:0042675,GO:0008134,GO:0007455,GO:0008406,GO:0004721,GO:0045739,GO:0045087,GO:0007411,GO:0010628,GO:0007280,GO:2001240,GO:0001746,GO:0016576,GO:0009416,GO:0007283,GO:0070285,GO:0006470,GO:0005634,GO:0030707,GO:0007419,GO:0072499,GO:0007435,GO:0042051		0	4.36	0.46	0	32.71	0	0	0	0	0.04		0	0	0	0	0.7	0	0	0	0	0.34	0	0	10.34	0	0.05	0.22	0	0	0	0	0	0	1.16	0	0.04	0	0	0	0	0	0	0
clt	cricklet	FBtr0071687	FBgn0000326	1844	GO:0060179,GO:0052689		3.14	0.54	0	0	0	0	0	0.32	0	5.03		1.73	0	0	0	0	0.34	0	0	0	0	1.99	19.12	0.72	0	0	0	0	0.7	0.34	3.27	0	0	0.05	0	0	0	0	9.14	3.72	22.47	1.68	0
cm	carmine	FBtr0071033	FBgn0000330	1469	GO:0007220,GO:0008565,GO:0007040,GO:0030131,GO:0046907,GO:0030123,GO:0006886,GO:0006727,GO:0006897,GO:0008340,GO:0006887		11.44	0	20.69	18.23	0	0	6.24	18.03	20.28	13.7		3.11	0	1.18	0.48	29.13	100.59	0.89	11.82	2.86	74.43	1.17	0	2.99	0	0	0	7.66	2.43	6.54	11.62	11.6	5.14	13.84	0	1.05	12.57	6.77	15.46	11.78	6.99	9.6	15.27
cm	carmine	FBtr0332315	FBgn0000330	1774	GO:0007220,GO:0008565,GO:0007040,GO:0030131,GO:0046907,GO:0030123,GO:0006886,GO:0006727,GO:0006897,GO:0008340,GO:0006887		8.84	39.28	25.17	1.84	0	148.76	12.68	15.35	1.26	0.37		3.02	0	0	0	17.6	0	0	0.54	0	0	15.12	5	0	0	0	0	0	0	0	20.94	0	0.86	3.49	0	7.52	0	0	0	0	0	0	26.86
cn	cinnabar	FBtr0344723	FBgn0000337	1790	GO:0004502,GO:0006569,GO:0055114,GO:0071949,GO:0019674,GO:0050660,GO:1901216,GO:0006727,GO:0016174,GO:0005741,GO:0019805,GO:0070189,GO:0048072		0	0	0	0	0	0	0	0	0	0		0	0	0	0	0	0	0	0	0	0	2.94	0	0	0	0	0	0	0	0	0	0	0	0	0	0	0	0	0	0	0	0	0
cni	cornichon	FBtr0080848	FBgn0000339	811	GO:0008314,GO:0005789,GO:0046843,GO:0007350,GO:0005515,GO:0009952,GO:0007310,GO:0016192,GO:0016021,GO:0007314,GO:0006888		3.98	8.37	27.1	0.14	0	0	0	3.57	0	3.74		3.74	8.45	0.31	0	0	12.34	27.27	5.26	61.12	0	62.01	114.97	7.09	6.02	0.2	0	22.09	0	0	16.86	0	18.45	25.45	0	16.16	0	29.7	16.24	7.54	45.9	0.07	10.82
cni	cornichon	FBtr0080849	FBgn0000339	878	GO:0008314,GO:0005789,GO:0046843,GO:0007350,GO:0005515,GO:0009952,GO:0007310,GO:0016192,GO:0016021,GO:0007314,GO:0006888		7.39	11.71	15.71	0	0	0	0	14.2	0	60.17		12.06	1.97	0	0	8.36	0	14.07	0	5.95	0	89.33	75.44	13.23	4.11	0	0	154.14	56.03	3.51	0	13.83	25.08	51.65	8.78	35.52	0	13.46	1.41	12.89	12.76	0	0
cni	cornichon	FBtr0337082	FBgn0000339	1132	GO:0008314,GO:0005789,GO:0046843,GO:0007350,GO:0005515,GO:0009952,GO:0007310,GO:0016192,GO:0016021,GO:0007314,GO:0006888		1.96	8.82	0.67	0	0	0	0	1.76	0	5.15		0.93	0	152.88	0	14.81	13.56	0	0	0	0	1.37	0.81	1.74	0	0	0	1.45	11.6	0	2.54	2.83	2.7	3.51	0	1.43	0	6.31	3.91	0	3.85	9.42	2.23
comt	comatose	FBtr0073754	FBgn0000346	3087	GO:0005737,GO:0007269,GO:0006914,GO:0048172,GO:0006909,GO:0031629,GO:0008021,GO:0070050,GO:1900073,GO:0005524,GO:0007274,GO:0098527,GO:0007030,GO:0043195,GO:0016082,GO:0090160,GO:0035494,GO:0016887		56.75	87.21	57.14	62.37	28.31	36.6	59.01	57.41	26.66	55.33		54.2	32.01	14.81	52	45.93	33.34	78.86	13.08	21.29	38.39	42.13	33.09	55.33	103.38	28.6	10.25	15.77	39.7	19.01	21.66	22.96	33.79	68.55	62.44	24.84	12.22	97.33	80.43	45.33	135.44	105.22	125.38
comt	comatose	FBtr0333329	FBgn0000346	3024	GO:0005737,GO:0007269,GO:0006914,GO:0048172,GO:0006909,GO:0031629,GO:0008021,GO:0070050,GO:1900073,GO:0005524,GO:0007274,GO:0098527,GO:0007030,GO:0043195,GO:0016082,GO:0090160,GO:0035494,GO:0016887		0	0.51	0	0	0	0	0	0	0	0.38		0	0	0	0	0	1.75	0	0	0	0	0.22	0	0	0	0	0	1.06	0.23	0	0	0	0	0	0	2.12	0	0	0	3.45	0.4	0	2.99
cort	cortex	FBtr0079320	FBgn0000351	1655	GO:0097027,GO:0007343,GO:0005737,GO:0007144,GO:0007349,GO:0010997,GO:0007279,GO:0031145,GO:0007143,GO:0045143,GO:0051441,GO:0007147		0.13	0.2	0.37	0	0	0	0	0	0	0		0.04	4.51	0	0	0	0	0	0	0	0	0	0	0.04	0.53	0	0	0	0	0	0	0	0	3.5	0	0	0	0	0	0	0	0	1.13
cort	cortex	FBtr0333350	FBgn0000351	1587	GO:0097027,GO:0007343,GO:0005737,GO:0007144,GO:0007349,GO:0010997,GO:0007279,GO:0031145,GO:0007143,GO:0045143,GO:0051441,GO:0007147		0	0	0	0	0	0	0	0.1	0	0		0	0	0	0	0	0	0	0	0	0	0.59	12.16	0	0	0	0	0	1.32	0	0	0	0	0	0	0	0	0	0	0.28	0	0	0
cos	costa	FBtr0089015	FBgn0000352	4763	GO:0005737,GO:0007224,GO:0005119,GO:0005524,GO:0005886,GO:0007228,GO:0019901,GO:0008017,GO:0042073,GO:0030162,GO:0030707,GO:0031647,GO:0003774,GO:0043433,GO:0042994,GO:0042992,GO:0045879,GO:0012506,GO:0005875,GO:0035301,GO:0042803,GO:0008134,GO:0005515,GO:0007476,GO:0045880,GO:0003777,GO:0008574,GO:0005871,GO:0007018,GO:0042981		8.57	16.75	3.19	18.68	30.29	0	17.15	7.1	2.76	3.63		4.15	4.07	8.26	0	0.36	0	1.9	6.04	0.35	7.91	11.44	6.28	5.5	9.25	9.51	1.11	6.93	0	0	3.06	7.32	0	18.64	22.96	11.94	3.21	0	0	0	0.34	1.78	5
cos	costa	FBtr0336916	FBgn0000352	4416	GO:0005737,GO:0007224,GO:0005119,GO:0005524,GO:0005886,GO:0007228,GO:0019901,GO:0008017,GO:0042073,GO:0030162,GO:0030707,GO:0031647,GO:0003774,GO:0043433,GO:0042994,GO:0042992,GO:0045879,GO:0012506,GO:0005875,GO:0035301,GO:0042803,GO:0008134,GO:0005515,GO:0007476,GO:0045880,GO:0003777,GO:0008574,GO:0005871,GO:0007018,GO:0042981		35.49	42.95	32.34	20.68	9.76	5.71	14.4	36.32	15.16	21.4		4.6	15	0	14.66	18.6	32.07	29.47	0	34.94	11.71	37.99	28.22	14.31	0	0	8.34	0	31.44	43.3	14.35	15.25	3.63	0	0	11.14	33.47	0.06	0	0	0	0	0
Cp15	Chorion protein 15	FBtr0076572	FBgn0000355	515	GO:0042600,GO:0007275		0	0.85	0	0	0	0	0	0	0	0		0	0	0	0	0	0	0	0	0	0	0	0	0	0	0	0	0	0	0	0	0	0	0	0	0	0	0	0	0	0	0	0
Cp16	Chorion protein 16	FBtr0076574	FBgn0000356	522	GO:0042600,GO:0046843,GO:0007275		0	0	0	0	0	0	0	0	0	0		0	0	0	0	0	0	0	0	0	0	0	0	0	0	0	0	0	0	0	0	0	0	0	0	0	0	0	0	0	0	0	0
Cp18	Chorion protein 18	FBtr0076571	FBgn0000357	649	GO:0042600,GO:0005213,GO:0007275		0.39	0	0	0	0	0	0	0	2.51	2.32		0.87	0	0	0	0	0	0	0	0	0	0	0	0	0	0	0	0	0	0	0	0	0	36.05	3.65	0.65	0	0	0	3.49	2.48	0	0
Cp19	Chorion protein 19	FBtr0076573	FBgn0000358	651	GO:0042600,GO:0007275		0	0	0	0	0	0	0	0	0	0		0	0	0	0	0	0	0	0	0	0	0	0	0	0	0	0	0	0	0	0	0	0	0	0	0	0	0	0	0	0	0	0
Cp36	Chorion protein 36	FBtr0071203	FBgn0000359	1116	GO:0042600,GO:0005213,GO:0007305,GO:0048477,GO:0007306		0	0	0	0	0	0	0	0	0	0		0	0	0	0	0	0	0	0	0	0	0	0	0	0	0	0	0	0	0	0	0	0	0	0	0	0	0	0	0	0	0	0
Cp38	Chorion protein 38	FBtr0071204	FBgn0000360	1112			0	0	0	0	0	0	0	0	0	0		0	0	0	0	0	0	0	0	0	0	0	0	0	0	0	0	0	0	0	0	0	1.19	0	0	0	0	0	0	0	0	0	0
Cp38	Chorion protein 38	FBtr0300448	FBgn0000360	1249			0	0	0	0	0	0	0	0	0	0		0	0	0	0	0	0	0	0	0	0	0	0	0	0	0	0	0	0	0	0	0	22.97	0	0	0	0	0	0	0	0	0	0
crc	cryptocephal	FBtr0081512	FBgn0000370	1905	GO:0046330,GO:0045944,GO:0006487,GO:0035073,GO:0030176,GO:0001102,GO:0003700,GO:0001105,GO:0035074,GO:0007552,GO:0000980,GO:0006355,GO:0046982,GO:0007591,GO:0005634,GO:0006641,GO:0042594,GO:0036499,GO:0005991		29.08	31.7	42.03	6.7	0	36.43	50.27	22.3	7.29	15.02		116.85	9.58	14.38	82.89	42.02	25.81	0	26.74	56.02	101.92	75.52	48.93	123.25	21.53	7.14	70.2	119.11	46.58	0	12.45	28.47	52.12	64.39	14.81	148.16	0	0	34.18	41.76	67.93	16.08	131.22
crc	cryptocephal	FBtr0081513	FBgn0000370	2515	GO:0046330,GO:0045944,GO:0006487,GO:0035073,GO:0030176,GO:0001102,GO:0003700,GO:0001105,GO:0035074,GO:0007552,GO:0000980,GO:0006355,GO:0046982,GO:0007591,GO:0005634,GO:0006641,GO:0042594,GO:0036499,GO:0005991		2.71	0.42	0.07	25.35	0	0	0	1.58	0.53	1.88		6.91	0	0.2	0.24	6.86	0.05	0	0	0	0.19	2.01	0.6	0.52	0.71	0.13	0.17	3.52	0.13	3.5	0.07	1.32	15.66	13.82	0	1.72	21.77	0	1.55	0	0	0	0.47
crc	cryptocephal	FBtr0332001	FBgn0000370	2244	GO:0046330,GO:0045944,GO:0006487,GO:0035073,GO:0030176,GO:0001102,GO:0003700,GO:0001105,GO:0035074,GO:0007552,GO:0000980,GO:0006355,GO:0046982,GO:0007591,GO:0005634,GO:0006641,GO:0042594,GO:0036499,GO:0005991		3.48	19.86	17.3	0.73	43.28	0	2.51	13.3	1.4	8.45		5.02	0	96.47	0	5.91	14.36	0	1.51	0.34	0	16.56	10.52	0.74	8.42	12.86	0	2.05	10.04	0.64	0	1.26	0.87	23.28	0	12.96	0	13.1	3.56	0	6.3	12.31	20.72
crc	cryptocephal	FBtr0332002	FBgn0000370	1878	GO:0046330,GO:0045944,GO:0006487,GO:0035073,GO:0030176,GO:0001102,GO:0003700,GO:0001105,GO:0035074,GO:0007552,GO:0000980,GO:0006355,GO:0046982,GO:0007591,GO:0005634,GO:0006641,GO:0042594,GO:0036499,GO:0005991		0	0.74	0	0	0.1	12.01	0	0	0	0		0.75	75.98	1.24	0	0	0	7.51	0.03	0	0	0	0	5.47	72.7	0	0	0	0	2.33	0	0	0	0	0	0	0	19.91	0	0	5.37	7.88	0
crm	cramped	FBtr0070495	FBgn0000376	3837	GO:0003677,GO:0003682,GO:0006355,GO:0005634,GO:0007379		13.51	1.25	0	0	0	0	0	0	7.27	0		0	0	0	0	0	0	0	0	0	0	0	0	0	0	0	0	0	5.42	0	0	0	0	12.96	0	6.16	0	0	0	0	0	0	0
crm	cramped	FBtr0070496	FBgn0000376	3780	GO:0003677,GO:0003682,GO:0006355,GO:0005634,GO:0007379		11.37	32.86	10.89	8.76	0	4.41	8.94	15.24	0.57	21.84		7.33	7.41	0	16.53	16.52	11.1	0	7.11	0.76	5.4	14.6	8.49	9.34	18.68	3.83	0.21	18.89	0	0.06	17.38	12.14	5.78	36.9	0.15	8.19	2.5	0	0	0	0	0	22.29
crn	crooked neck	FBtr0070418	FBgn0000377	2332	GO:0007443,GO:0000381,GO:0000974,GO:0005737,GO:0016607,GO:0008347,GO:0071014,GO:0071013,GO:0071010,GO:0008366,GO:0071011,GO:0071012,GO:0000398,GO:0003723,GO:0007438,GO:0005634,GO:0000245		9.04	9.9	15.46	23.2	0	6.25	14.12	4.79	0.79	9.76		3.8	4.11	11.15	0	10.89	13.86	2.83	0.42	0	0.06	2.41	0.12	1.89	6.44	0	0	1.19	10.16	11.93	17.82	8.72	26.37	0.88	0	15.72	0	12.99	0.58	12.34	12.03	3.38	22.62
csw	corkscrew	FBtr0070378	FBgn0000382	4560	GO:0004728,GO:0005737,GO:0007465,GO:0007362,GO:0006911,GO:0000278,GO:0007498,GO:0004725,GO:0045314,GO:0007173,GO:0007428,GO:0007444,GO:0008293,GO:0008543,GO:0008069,GO:0008595,GO:0004726,GO:0045500,GO:0005515,GO:0043066,GO:0007418,GO:0007427,GO:0006470,GO:0016311,GO:0007424		39.69	29.12	13.76	5.56	0	16.29	0	53.93	15.33	27.12		9.96	2.77	8.79	0	36.32	30.94	0	1.38	2.65	0	55.82	5.2	10.38	13.14	0.25	1.15	26.49	24.03	1.93	10.15	8.32	8.86	40.97	8.05	46.06	7.28	2.24	0	1.22	4.67	0	0
csw	corkscrew	FBtr0070379	FBgn0000382	7664	GO:0004728,GO:0005737,GO:0007465,GO:0007362,GO:0006911,GO:0000278,GO:0007498,GO:0004725,GO:0045314,GO:0007173,GO:0007428,GO:0007444,GO:0008293,GO:0008543,GO:0008069,GO:0008595,GO:0004726,GO:0045500,GO:0005515,GO:0043066,GO:0007418,GO:0007427,GO:0006470,GO:0016311,GO:0007424		20.28	9.82	26.53	3.38	11.31	3.02	12.73	48.45	20.74	27.73		21.18	2.97	70.95	219.1	34.29	40.93	105.33	9.24	4.86	75.62	30.77	46.9	35.7	22.66	11.63	59.42	5.75	10.07	5.15	5.97	25.02	17.21	21.63	23.8	18.47	185.16	0	1.32	0.45	0	0	13.72
csw	corkscrew	FBtr0070380	FBgn0000382	4106	GO:0004728,GO:0005737,GO:0007465,GO:0007362,GO:0006911,GO:0000278,GO:0007498,GO:0004725,GO:0045314,GO:0007173,GO:0007428,GO:0007444,GO:0008293,GO:0008543,GO:0008069,GO:0008595,GO:0004726,GO:0045500,GO:0005515,GO:0043066,GO:0007418,GO:0007427,GO:0006470,GO:0016311,GO:0007424		0	0	0	0	0	0	0	0	0	0		0	0	0	0	0	3.15	0	0	0	0	0	0	0	0	0	0	11.55	0	0	0	0	6.65	84.84	0	0	0	0	0	0	0.57	0	0
csw	corkscrew	FBtr0333260	FBgn0000382	7119	GO:0004728,GO:0005737,GO:0007465,GO:0007362,GO:0006911,GO:0000278,GO:0007498,GO:0004725,GO:0045314,GO:0007173,GO:0007428,GO:0007444,GO:0008293,GO:0008543,GO:0008069,GO:0008595,GO:0004726,GO:0045500,GO:0005515,GO:0043066,GO:0007418,GO:0007427,GO:0006470,GO:0016311,GO:0007424		159.76	181.2	188.21	170.86	75.12	96.33	123.73	201.02	115.98	138.29		57.38	586.47	429.62	776.36	140.71	161.44	77.82	159.97	442.39	387.96	603.13	399.14	291.79	580.75	897.75	431.43	121.32	119.8	136.75	165	118.49	116.62	114.61	349.54	198.96	494.27	39.57	33.25	41.34	39.92	38.52	73.8
cta	concertina	FBtr0111126	FBgn0000384	2156	GO:0070252,GO:0031683,GO:0031684,GO:0004871,GO:0003924,GO:0007266,GO:0043519,GO:0031752,GO:0031526,GO:0005886,GO:0007188,GO:0003380,GO:0060027,GO:0003384,GO:0010004,GO:0007369,GO:0048383,GO:0005834,GO:0010470,GO:0005525,GO:0016476		9.81	18.93	3.92	0	0	2.59	59.01	13.76	22.98	10.62		6.41	0	0	0	15.73	0	0	3.48	0	7.13	13.38	0	8.32	19.13	0	1.44	4.25	1.49	0	17.94	66.06	2.02	0	0	4.45	0	0	0.8	7.68	0.21	0	0
cta	concertina	FBtr0334157	FBgn0000384	2764	GO:0070252,GO:0031683,GO:0031684,GO:0004871,GO:0003924,GO:0007266,GO:0043519,GO:0031752,GO:0031526,GO:0005886,GO:0007188,GO:0003380,GO:0060027,GO:0003384,GO:0010004,GO:0007369,GO:0048383,GO:0005834,GO:0010470,GO:0005525,GO:0016476		15.92	19.91	29.51	16.06	0.12	10.49	0.68	12.4	8.32	18.74		5.26	34.24	24.71	13.95	3.28	9.01	13.15	1.79	0.64	0	4.4	6.69	10.46	14.29	2.11	0.96	13.63	4.85	6.57	2.62	6.55	8.98	8.91	5.87	16.37	4.86	1.92	0	0.46	4.56	2.53	4.13
cup	cup	FBtr0290322	FBgn0000392	4002	GO:0005737,GO:0008582,GO:0009953,GO:0008298,GO:0007143,GO:0007297,GO:0017148,GO:0003723,GO:0005829,GO:0045182,GO:0045132,GO:0048477,GO:0043195,GO:0007317,GO:0000932,GO:0007319,GO:0031594,GO:0005634		0.03	0	0	0	0	0	0	0.02	0	0.19		0.31	0	0	0	0	0.02	0	0	5.26	0.02	0.02	0	0.94	0	0.02	0	0	0.02	0	0.05	0	0.35	0	0.33	0	0	0.04	0.13	0.07	0	0.05	0.83
cup	cup	FBtr0346452	FBgn0000392	4306	GO:0005737,GO:0008582,GO:0009953,GO:0008298,GO:0007143,GO:0007297,GO:0017148,GO:0003723,GO:0005829,GO:0045182,GO:0045132,GO:0048477,GO:0043195,GO:0007317,GO:0000932,GO:0007319,GO:0031594,GO:0005634		0	0.6	0.71	0	0	0	0	0	0	0		0	0	1.07	0	0	0	0	0	0	0	0	0	0	0	0	0	0	0	0	0	0	0	0	0	0	0	0	0	0	0	0	0
cv	crossveinless	FBtr0070804	FBgn0000394	1893	GO:0048636,GO:0007630		0.12	0.24	0	0	0	0	0	0.47	0	0		1.85	0	0.01	0	0	0	3.77	0	0.82	0.91	2	0	0.63	0.61	0	0	0	0.56	0	5.54	0.28	1.06	0	0	4.05	0	0.35	0.57	0.36	0.39	0.62	0.54
cv	crossveinless	FBtr0340464	FBgn0000394	1308	GO:0048636,GO:0007630		0	0	0	0	0	0	0	2.86	0	0.3		3.73	0	0	0	0	0	0	0	1.06	0	0	0	0	0	0	0	0.77	0	0	0	0	0	0	0	0	0	0	0	0	0	0	0
cv	crossveinless	FBtr0340465	FBgn0000394	1742	GO:0048636,GO:0007630		0	0	0	0	0	0	0	0	0	0		0	0	0	0	0	0	0	0	0	0	0	0	0	0	0	0	0.21	0	0	0	0	0	0	0	0	0	0	0	0	0	0	0
cv-2	crossveinless 2	FBtr0071610	FBgn0000395	4329	GO:0007474,GO:0070700,GO:0030510,GO:0045446,GO:0007476,GO:0036122,GO:0030514,GO:0043395,GO:0009986		0.09	0.05	1.63	0.13	0	0	0	0	0.32	0.17		3.49	0	0.05	0	2.54	0	0	0	0	0	3.4	16.82	4.77	4.8	18.66	0	4.07	0	0	0	0	0.36	16.38	0.75	6.78	4.77	0	0.89	5.82	0	0	0
CycA	Cyclin A	FBtr0076075	FBgn0000404	2555	GO:0016538,GO:0005737,GO:0045170,GO:0007096,GO:0007422,GO:0000278,GO:0009794,GO:0007088,GO:0045841,GO:0055059,GO:0005515,GO:0046331,GO:0000070,GO:0005634,GO:0035561,GO:0035186		0	0.3	0	0	0	0	0	0	0	0		0	0	0	0	0	0.19	0	0.97	0	0	0	0	0.18	0.93	0	0	0	0	0	0	0	0	0	0	0	0	0	0	0	0	0	0
CycA	Cyclin A	FBtr0304650	FBgn0000404	2916	GO:0016538,GO:0005737,GO:0045170,GO:0007096,GO:0007422,GO:0000278,GO:0009794,GO:0007088,GO:0045841,GO:0055059,GO:0005515,GO:0046331,GO:0000070,GO:0005634,GO:0035561,GO:0035186		0	0	0	0	0	0	0	0.25	0	0		0.8	0	0	0	0	0	0	0	0	0	0.43	0	0	0	0	0	3.08	0	0	0	0	2.55	0	0	0.04	0	0	0	1.27	0	0	6.75
CycB	Cyclin B	FBtr0071911	FBgn0000405	2633	GO:0051233,GO:0016538,GO:0005737,GO:0008608,GO:0007079,GO:0000086,GO:0000920,GO:0005515,GO:0072686,GO:0000281,GO:0005819,GO:0006974,GO:0001700,GO:0005634,GO:0035561,GO:0035186,GO:0000775		0	0	0	0	0	0	0	0	0	0		0	0	0	0	0	0	0	0	0	0	0	0	0	0	0	0	0	0	0	0	0	0	0	0	0	0	0	0	0	0	0	0
CycB	Cyclin B	FBtr0071913	FBgn0000405	2556	GO:0051233,GO:0016538,GO:0005737,GO:0008608,GO:0007079,GO:0000086,GO:0000920,GO:0005515,GO:0072686,GO:0000281,GO:0005819,GO:0006974,GO:0001700,GO:0005634,GO:0035561,GO:0035186,GO:0000775		0	0	0	0	0	0	0	0	0	0		0	0	0	0	0	0	0	0	0	0	0	0	0	0	0	0	0	0	0	0	0	0	0	0	0	0	0	0	0	0	0	0
CycB	Cyclin B	FBtr0071914	FBgn0000405	2548	GO:0051233,GO:0016538,GO:0005737,GO:0008608,GO:0007079,GO:0000086,GO:0000920,GO:0005515,GO:0072686,GO:0000281,GO:0005819,GO:0006974,GO:0001700,GO:0005634,GO:0035561,GO:0035186,GO:0000775		0.04	0	0	0	0	0	0	0	0.52	0		0.12	0	0	0	0	7.26	0	0	0	1.25	0	0.95	0	0.33	0	0	2.01	0	0	0	0	0.48	4.86	0	0.08	0	0	0	0	0	0	0
CycB	Cyclin B	FBtr0309858	FBgn0000405	2627	GO:0051233,GO:0016538,GO:0005737,GO:0008608,GO:0007079,GO:0000086,GO:0000920,GO:0005515,GO:0072686,GO:0000281,GO:0005819,GO:0006974,GO:0001700,GO:0005634,GO:0035561,GO:0035186,GO:0000775		0	0	0	0	0	0	0	0	0	0		0	0	0	0	0	0	0	0	0	0	0	0	0	0	0	0	0	0	0	0	0	0	0	0	0	0	0	0	0	0	0	0
Cyt-b5-r	Cytochrome b5-related	FBtr0080932	FBgn0000406	1465	GO:0006629,GO:0005739,GO:0016491,GO:0020037,GO:0016021		0	0	0	0	0	0	0	0	0	0		0	0	0	0	0	0	0	0	0	0	0	0	0	0	0	0	2.12	0	0	0	0	0.48	0	0	0	0	0	0	0	0	0	0
Cyt-b5-r	Cytochrome b5-related	FBtr0331931	FBgn0000406	1557	GO:0006629,GO:0005739,GO:0016491,GO:0020037,GO:0016021		0	0	0	0	0	0	0	0	0	0		0	0	0	0	0	0	0	0	0	0	0	0	0	0	0	0	0	0	0	0	0	0	0	0	0	0	0	0	0	0	0	0
D	Dichaete	FBtr0075746	FBgn0000411	2935	GO:0003705,GO:0007420,GO:0005737,GO:0070983,GO:0060810,GO:0045944,GO:0010468,GO:0003677,GO:0045893,GO:0000122,GO:0043565,GO:0007417,GO:0014019,GO:0035120,GO:0008134,GO:0007350,GO:0007442,GO:0007411,GO:0003700,GO:0006355,GO:0003730,GO:0006357,GO:0005634,GO:0009950,GO:0002168,GO:0008301		0	0	0	0	0	0	0	0	0	0		0	0	0	0	0	0	0	0	0	0	0	0	0	0	0	0	0	0	0	0	0	0	0	0	0	0	0	0	0	0	0	0
D	Dichaete	FBtr0333034	FBgn0000411	1612	GO:0003705,GO:0007420,GO:0005737,GO:0070983,GO:0060810,GO:0045944,GO:0010468,GO:0003677,GO:0045893,GO:0000122,GO:0043565,GO:0007417,GO:0014019,GO:0035120,GO:0008134,GO:0007350,GO:0007442,GO:0007411,GO:0003700,GO:0006355,GO:0003730,GO:0006357,GO:0005634,GO:0009950,GO:0002168,GO:0008301		0	0	0	0	0	0.17	0	0	0	0		11.91	44.2	0	0.14	0.17	0	0	0.06	1.83	0	4.22	0	0	0	0.08	0	0.06	0.08	0	0	0	5.91	45.77	0	0	0	0	0	0	0	0	0
D	Dichaete	FBtr0333035	FBgn0000411	1928	GO:0003705,GO:0007420,GO:0005737,GO:0070983,GO:0060810,GO:0045944,GO:0010468,GO:0003677,GO:0045893,GO:0000122,GO:0043565,GO:0007417,GO:0014019,GO:0035120,GO:0008134,GO:0007350,GO:0007442,GO:0007411,GO:0003700,GO:0006355,GO:0003730,GO:0006357,GO:0005634,GO:0009950,GO:0002168,GO:0008301		0	0	0	0	0	0	0	0	0.27	0		11.77	0	0	0	0	0	0.3	0	0	0	0	0	32.94	0	0	0	0	0	0	0	0	9.01	19.52	0	43.23	653.35	0	0	0	0	0	0.05
D	Dichaete	FBtr0333036	FBgn0000411	2619	GO:0003705,GO:0007420,GO:0005737,GO:0070983,GO:0060810,GO:0045944,GO:0010468,GO:0003677,GO:0045893,GO:0000122,GO:0043565,GO:0007417,GO:0014019,GO:0035120,GO:0008134,GO:0007350,GO:0007442,GO:0007411,GO:0003700,GO:0006355,GO:0003730,GO:0006357,GO:0005634,GO:0009950,GO:0002168,GO:0008301		0	0	0	0	0	0	0	0	0	0		0	0	0	0	0	0	0	0	0	0	0	0	0	0	0	0	0	0	0	0	0	0	0	0	0	0	0	0	0	0	0	0
D1	D1 chromosomal protein	FBtr0081987	FBgn0000412	1811	GO:0005737,GO:0000786,GO:0003680,GO:0005700,GO:0003696,GO:0000792,GO:0005634		0	0	0	0	0	0	0	0	0	0		0.73	0	16.64	0	0	0	0	0	0	0	0	0	0	0	0	0	0	0	0	0	0	0	0	0	0	0	0	0	0	0	0	0
D1	D1 chromosomal protein	FBtr0081988	FBgn0000412	1734	GO:0005737,GO:0000786,GO:0003680,GO:0005700,GO:0003696,GO:0000792,GO:0005634		32.87	57.75	42.16	43.71	0	0	3.82	25.97	63.91	29.81		25.49	0	0	0	6.32	43.61	0	0	0	0	74.08	23.49	7.35	71.88	0	0	63.88	25.83	0	43.05	14.81	2.34	18.61	0	61.08	0	23.26	0	26.61	95.81	43.84	0
D1	D1 chromosomal protein	FBtr0301524	FBgn0000412	1597	GO:0005737,GO:0000786,GO:0003680,GO:0005700,GO:0003696,GO:0000792,GO:0005634		63.82	53.23	82.53	24.64	75.52	77.69	91.17	49.97	0	77.82		33.61	42.27	2.93	3.04	84.16	9.87	9.42	37.64	50.97	0.99	84.25	83.34	39.48	131.97	10.31	48.05	4.1	19.92	13.87	0	48.54	38.74	46.74	603.18	0	48	51.35	53.68	16.94	0	3.4	14.12
Dab	Disabled	FBtr0075318	FBgn0000414	8461	GO:0007391,GO:0005737,GO:0007349,GO:0005118,GO:0017124,GO:0030424,GO:0045500,GO:0005515,GO:0072583,GO:0008045,GO:0048488,GO:0042169,GO:0042051		8.67	15.2	4.79	3.85	0.66	1.68	9.01	5.61	3.37	7.04		3.46	4.37	3.69	22.65	10.2	4.47	6.98	6.3	3.28	0.67	13.91	13.09	14.93	14.15	4.8	0.44	5.65	8.04	2.88	0.58	4.29	2.9	10.27	22.78	4.21	220.56	1.33	2.18	1.34	1.45	0.6	4.43
Dab	Disabled	FBtr0305084	FBgn0000414	7990	GO:0007391,GO:0005737,GO:0007349,GO:0005118,GO:0017124,GO:0030424,GO:0045500,GO:0005515,GO:0072583,GO:0008045,GO:0048488,GO:0042169,GO:0042051		0	0	0	54.14	23.07	5.6	0	0	0	0		3.89	5.22	0	0	0	0	5.51	0	1.27	22.89	13.73	0	0	0	0	51.04	0	4.79	14.37	0	0	0	59.17	0.25	20.21	0	1.73	0	2.09	2.32	2.62	4.46
Dab	Disabled	FBtr0305085	FBgn0000414	8449	GO:0007391,GO:0005737,GO:0007349,GO:0005118,GO:0017124,GO:0030424,GO:0045500,GO:0005515,GO:0072583,GO:0008045,GO:0048488,GO:0042169,GO:0042051		41.82	42.22	38.36	9.57	32.24	11.67	28.77	37.23	16.54	21.04		11.21	8.02	0	11.04	22.04	35.91	0.38	26.49	3.29	0	15.25	9.83	10.88	32.65	0	44.68	8.99	21.09	10.67	24.6	21.98	18.8	4.49	0	23.32	0.51	0	0	0	0.96	0	0
Dab	Disabled	FBtr0305086	FBgn0000414	7842	GO:0007391,GO:0005737,GO:0007349,GO:0005118,GO:0017124,GO:0030424,GO:0045500,GO:0005515,GO:0072583,GO:0008045,GO:0048488,GO:0042169,GO:0042051		0	0	0	0	0	0	0	0	0	0		0	0	58.86	0	0	0	0	0	0	0	0	0	0	0	29.84	0	0	0	0	0	0	0	0	0	0	0	0	0	0	0	0	0
Dab	Disabled	FBtr0330189	FBgn0000414	8301	GO:0007391,GO:0005737,GO:0007349,GO:0005118,GO:0017124,GO:0030424,GO:0045500,GO:0005515,GO:0072583,GO:0008045,GO:0048488,GO:0042169,GO:0042051		0	0	0	0	0	0	0	0	0	0		0	0	0	0	0	0	0	0	0	0	0	0	0	0	3.82	0	0	0	0	0	0	0	0	0	0	0	0	0	0	0	0	0
Dab	Disabled	FBtr0330190	FBgn0000414	8449	GO:0007391,GO:0005737,GO:0007349,GO:0005118,GO:0017124,GO:0030424,GO:0045500,GO:0005515,GO:0072583,GO:0008045,GO:0048488,GO:0042169,GO:0042051		41.82	42.22	38.36	9.57	32.24	11.67	28.77	37.23	16.54	21.04		11.21	8.02	0	11.04	22.04	35.91	0.38	26.49	3.29	0	15.25	9.83	10.88	32.65	0	44.68	8.99	21.09	10.67	24.6	21.98	18.8	4.49	0	23.32	0.51	0	0	0	0.96	0	0
Dab	Disabled	FBtr0333625	FBgn0000414	8067	GO:0007391,GO:0005737,GO:0007349,GO:0005118,GO:0017124,GO:0030424,GO:0045500,GO:0005515,GO:0072583,GO:0008045,GO:0048488,GO:0042169,GO:0042051		0	0	0.32	0	0	0	0	0	0	0		0	0	0	0	0	0	0	0	0	0	0	0	0	0	0	0	0	0	0	0	0	0	0	0	0	0	0	0.38	0	0	0	0
Dab	Disabled	FBtr0333626	FBgn0000414	8076	GO:0007391,GO:0005737,GO:0007349,GO:0005118,GO:0017124,GO:0030424,GO:0045500,GO:0005515,GO:0072583,GO:0008045,GO:0048488,GO:0042169,GO:0042051		0.27	0	0	0	0	0	0	0	0	0		0.08	0	0	0	0	0	0	0	0	0	0.31	0	0	0	0	0.09	0	0	0	0	0	0	0	0	0	0	0	0	0	0	0	0
Sap-r	Saposin-related	FBtr0085713	FBgn0000416	3440	GO:0005764,GO:0033227,GO:0006665,GO:0001664,GO:0008047,GO:0045169		21.32	11.35	7.95	0	0	0	0	3.02	4.08	7.54		25.56	0	30.69	0	1.34	0	0	0	0	0	0	0	0	38.99	0	0	103.1	6.88	65.85	24.94	96.07	0.97	18.47	0	6.44	0	0	18.42	0	42.12	0	0
Sap-r	Saposin-related	FBtr0085714	FBgn0000416	3349	GO:0005764,GO:0033227,GO:0006665,GO:0001664,GO:0008047,GO:0045169		62.75	66.8	77.77	109.43	10.77	139.44	19.65	67.17	72.07	62.7		45.57	10.25	22.82	14.17	75.11	58.4	56.18	54.33	57.53	52.69	112.23	90.28	43.62	0	5.63	138.49	569.89	68.63	0	57.95	13.48	102.18	52.82	32.66	73.39	1.87	16.72	0	30.37	0	29.01	119.31
Ddc	Dopa decarboxylase	FBtr0081166	FBgn0000422	1929	GO:0043052,GO:0009611,GO:0035220,GO:0048082,GO:0004058,GO:0006587,GO:0048066,GO:0030170,GO:0040040,GO:0048085,GO:0007615,GO:0007616,GO:0008062,GO:0007611,GO:0007619,GO:0006585,GO:0040007		0	0	0	0	0	0	0	0	0	0		56.38	17.67	0	0	0	38.57	78.27	60.61	50.11	65.99	142.13	221.6	0	0	0	0	1.52	0	0	0	0	11.93	0	0	44.2	0	0	0	0	0	0	400.17
Ddc	Dopa decarboxylase	FBtr0081167	FBgn0000422	2085	GO:0043052,GO:0009611,GO:0035220,GO:0048082,GO:0004058,GO:0006587,GO:0048066,GO:0030170,GO:0040040,GO:0048085,GO:0007615,GO:0007616,GO:0008062,GO:0007611,GO:0007619,GO:0006585,GO:0040007		0.6	0.91	0.93	0	16.86	18.96	8.53	1.36	0.06	0		11.23	140.05	14.98	15.83	34.38	10.06	34.87	47.12	10.13	68.74	111.25	84.47	12.68	47.55	19.53	24.17	10.89	39.16	6.49	41.32	17.85	20.22	33.56	1.03	59.28	1.4	0	0	0	0	0	26.76
Ddc	Dopa decarboxylase	FBtr0290291	FBgn0000422	2797	GO:0043052,GO:0009611,GO:0035220,GO:0048082,GO:0004058,GO:0006587,GO:0048066,GO:0030170,GO:0040040,GO:0048085,GO:0007615,GO:0007616,GO:0008062,GO:0007611,GO:0007619,GO:0006585,GO:0040007		65	83.12	69.65	72.5	20.45	6.07	72.07	36.4	51.85	36.68		40.5	260.92	1019.25	506.59	480.85	667.43	106.73	152.97	210.15	130.38	432.6	226.77	105.38	362.94	380.47	169.96	325.38	520.32	279.3	430.52	353.19	125	288.62	154.41	463.75	176.36	7.69	3.09	44.58	12.88	6.45	9.74
SmF	Small ribonucleoprotein particle protein SmF	FBtr0088010	FBgn0000426	467	GO:0005685,GO:0005681,GO:0071013,GO:0071011,GO:0000398,GO:0003723,GO:0005732,GO:0030532,GO:0000387		14.02	19.67	0	0	0	0	0	0.44	0	3.68		5.43	0	0	0	12.63	0	0	0	0	0	13.97	0	0	0	0	0	1.02	0.75	0	0	0	0	0	0	0	0	116.38	25.69	54.2	45.85	46.57	0
2017-12-01	defective chorion 1	FBtr0071145	FBgn0000427	5696	GO:0007304,GO:0007306,GO:0042600,GO:0005213,GO:0005576		0	0	0	0	0	0	0	0	0	0		0	0	0	0	0	0	0	0	0	0	0	0	0	0	0	0	0	0	0	0	0	0	0	0	0	0	0	0	0	0	0	0
2017-12-01	defective chorion 1	FBtr0071146	FBgn0000427	3737	GO:0007304,GO:0007306,GO:0042600,GO:0005213,GO:0005576		0	0	0	0	0	0	0	0	0	0		0	0	0	0	0	0	0	0	0	0	0	0	0	0	0	0	0	0	0	0	0	0	0	0	0	0	0	0	0	0	0	0
2017-12-01	defective chorion 1	FBtr0071147	FBgn0000427	3751	GO:0007304,GO:0007306,GO:0042600,GO:0005213,GO:0005576		0	0	0	0	0	0	0	0	0	0		0	0	0	0	0	0	0	0	0	0	0	0	0	0	0	0	0	0	0	0	0	0	0	0	0	0	0	0	0	0	0	0
2017-12-01	defective chorion 1	FBtr0309795	FBgn0000427	3686	GO:0007304,GO:0007306,GO:0042600,GO:0005213,GO:0005576		0	0	0	0	0	0	0	0	0	0		0	0	0	0	0	0	0	0	0	0	0	0	0	0	0	0	0	0	0	0	0	0	0	0	0	0	0	0	0	0	0	0
2017-12-01	defective chorion 1	FBtr0309796	FBgn0000427	3612	GO:0007304,GO:0007306,GO:0042600,GO:0005213,GO:0005576		0	0	0	0	0	0	0	0	0	0		0	0	0	0	0	0	0	0	0	0	0	0	0	3.98	0	0	0	0	0	0	0	0.05	0	0	0	0	0	0	0	0.56	0	0
2017-12-01	defective chorion 1	FBtr0310269	FBgn0000427	5683	GO:0007304,GO:0007306,GO:0042600,GO:0005213,GO:0005576		0.14	0	0	0	0	0	0	0	0	0		0.05	0	0	0	0	0	0	0	0	0	0	0	0	0	0	0	0	0	0	0	0	0	0	0	8.32	0	0	0	1.25	0	0	0
Dfd	Deformed	FBtr0081621	FBgn0000439	2739	GO:0003705,GO:0060322,GO:0000977,GO:0045944,GO:1902339,GO:0010468,GO:0000122,GO:0043565,GO:0001158,GO:0003700,GO:0033613,GO:1990403,GO:0060323,GO:0035289,GO:0007380,GO:0005634		0	0	0	0.39	0	0	0	0	0	0		0.09	0	0	0	0	0	0	0	0	0	0	0	0	0	0	0	0	0	0	0	0	0	0	0	0	0	0	0	0	0	0	0
Pkg21D	Protein kinase, cGMP-dependent at 21D	FBtr0078042	FBgn0000442	2583	GO:0005737,GO:0004692,GO:0005524,GO:0007526,GO:0004674,GO:0010906,GO:0006468		0.24	0	0	0	0	0	0	0	0	0		1.23	0	0	0	0	0	0	0	0	0	0	0	2.61	0	0	0	0	0.34	0	0	0	1.87	2.69	0	0	0	0	0	0	0	0	0
Dhod	Dihydroorotate dehydrogenase	FBtr0081890	FBgn0000447	1355	GO:0005743,GO:0055114,GO:0005758,GO:0004152,GO:0006207		1.93	0	0	0.85	9.79	0	11.08	0.34	0.32	0.77		2.47	0	0	0	0.52	0	0	0.83	0	0	0	0.11	2.51	0	0	0	1.65	0.59	9.85	0.44	0.49	0	0	0	0	0	17.18	3.58	4.36	6.63	5.18	7.45
Dhod	Dihydroorotate dehydrogenase	FBtr0300442	FBgn0000447	1472	GO:0005743,GO:0055114,GO:0005758,GO:0004152,GO:0006207		0	5.97	0.85	0	0	0	3.54	0	0	0		0	0	0	0	0	0	0	0	0	0	0	0	0	0	0	0	0	0	0.98	0	0	0	0	0	0	0	0	0	0	0	0	0
Hr3	Hormone receptor 3	FBtr0088366	FBgn0000448	6466	GO:0040034,GO:0000122,GO:0016319,GO:0004879,GO:0003707,GO:0045944,GO:0000977,GO:0005515,GO:0007552,GO:0004887,GO:0008270,GO:0005634,GO:0043401		0	0	0	0	0	12.05	0	0	0	18.45		0	0	0	0	24.27	0	3.46	0	0	0	0	0	0	0	0	0	0	23.91	21.74	7.9	3.55	0	0	0	1.42	0	0	0	0	0	0	0
Hr3	Hormone receptor 3	FBtr0088368	FBgn0000448	6071	GO:0040034,GO:0000122,GO:0016319,GO:0004879,GO:0003707,GO:0045944,GO:0000977,GO:0005515,GO:0007552,GO:0004887,GO:0008270,GO:0005634,GO:0043401		0	0.14	0	0	0	0	0	9.01	0	0.01		0	0	0	0	0.01	0	0	0	0	0	0	0	0	0	0	0	0	0.17	4	0.11	0	0	0	0	0	0	0	0	0	0	0	0
Hr3	Hormone receptor 3	FBtr0112799	FBgn0000448	4233	GO:0040034,GO:0000122,GO:0016319,GO:0004879,GO:0003707,GO:0045944,GO:0000977,GO:0005515,GO:0007552,GO:0004887,GO:0008270,GO:0005634,GO:0043401		48.33	37.87	53.59	9.48	23.48	0.46	13.93	41.97	12.91	20.18		0	0	172.61	0	0.73	0	0	0	128.91	0	7.37	42.72	0	0	0	106.11	0	0	0	13.75	0	2.02	13.99	132.47	0	0	0	0	1.26	0.01	4.33	13.76
Hr3	Hormone receptor 3	FBtr0306345	FBgn0000448	7524	GO:0040034,GO:0000122,GO:0016319,GO:0004879,GO:0003707,GO:0045944,GO:0000977,GO:0005515,GO:0007552,GO:0004887,GO:0008270,GO:0005634,GO:0043401		17.03	24.55	26.51	15.96	8.29	12.25	5.75	10.72	18.89	19.71		5.02	115.44	10.04	114.06	14.93	36.76	30.77	9.88	7.18	76.66	80.73	41.61	36.32	148.23	187.65	123.12	15.21	17.74	10.2	16.09	3.11	13.06	32.74	73.43	47.44	126.52	1.13	0	0	0.95	1.64	0.35
Hr3	Hormone receptor 3	FBtr0330609	FBgn0000448	6071	GO:0040034,GO:0000122,GO:0016319,GO:0004879,GO:0003707,GO:0045944,GO:0000977,GO:0005515,GO:0007552,GO:0004887,GO:0008270,GO:0005634,GO:0043401		0	0.14	0	0	0	0	0	9.01	0	0.01		0	0	0	0	0.01	0	0	0	0	0	0	0	0	0	0	0	0	0.17	4	0.11	0	0	0	0	0	0	0	0	0	0	0	0
Hr3	Hormone receptor 3	FBtr0452140	FBgn0000448	7925	GO:0040034,GO:0000122,GO:0016319,GO:0004879,GO:0003707,GO:0045944,GO:0000977,GO:0005515,GO:0007552,GO:0004887,GO:0008270,GO:0005634,GO:0043401		55.08	69.01	80.85	70.51	94.17	23.09	36	96.51	42.89	53.72		19.06	46.33	103.94	30.9	37.07	52.83	52.92	48.48	73.07	89.26	67.34	74.75	45.64	58.2	61.39	0	66.2	13.76	0.03	2.83	42.61	19.16	38.99	36.63	43.5	96.15	8.43	6.45	4.04	4.31	0	37.36
dib	disembodied	FBtr0073205	FBgn0000449	1975	GO:0007391,GO:0008258,GO:0009055,GO:0005506,GO:0055114,GO:0016705,GO:0005739,GO:0042767,GO:0007417,GO:0007494,GO:0006697,GO:0020037,GO:0008362		0.17	1.2	0.22	0	0	12.47	25.79	1.19	0	2.52		0.42	0.56	59.33	7.13	0.09	0	0	0	0	0	0.08	0.72	0.05	11.43	11.73	0	3.83	0	0	0	0.17	0	11.97	0	0.19	87.94	0	0	0	1.46	0	1.63
ect	ectodermal	FBtr0076305	FBgn0000451	2103	GO:0035295,GO:0003674,GO:0005575,GO:0005634		0	0	0	0	0	0	0	0	0	0		0	0	0	0	0	0	0	0	0	0	0	0	0	0	0	0	0	0	0	0	0	0	0	0	0	0	0	0	0	0	0	0
ect	ectodermal	FBtr0076307	FBgn0000451	2046	GO:0035295,GO:0003674,GO:0005575,GO:0005634		0	0	0	0	0	0	0	0	0	0		0.09	0	0	0	0	0	0	0	0	0	0	0	0	0	0	0	0	0	0	0	0	0	0	0	0	0	0	0	0	0	0	0
ect	ectodermal	FBtr0301385	FBgn0000451	2426	GO:0035295,GO:0003674,GO:0005575,GO:0005634		0	0	0	0	0	0	0	0	0	0		0.17	0	0	0.05	0	0	0	0	0	0.63	0	0	0	0	0	0	0	0	0	0	0	0	0	11.18	10.17	0	0	0	0	0.43	0	0
ect	ectodermal	FBtr0331551	FBgn0000451	1947	GO:0035295,GO:0003674,GO:0005575,GO:0005634		0	0	0	0	0	0	0	0	0	0		0	0	0	0	0	0	0.07	2.83	0	0	0	0	0	0	0	0	0	0	0	0	0	0	0	0	0	0	0	0	0	0	0	0
ect	ectodermal	FBtr0339899	FBgn0000451	2070	GO:0035295,GO:0003674,GO:0005575,GO:0005634		0	0	0	0	0	0	0	0	0	0		0	0	0	0	0	0	0	0	0	0	0	0	0	0	0	0	0	0	0	0	0	0	0	0	0	0	0	0	0	0	0	0
Dip-B	Dipeptidase B	FBtr0082831	FBgn0000454	2034	GO:0005737,GO:0008235,GO:0030145,GO:0008239,GO:0008240,GO:0006508		0.43	1.84	0.51	0	0	0	0	0	0	0		0.3	0	0	0	0	0	0	0	0	0	0	0	0	0	0	0	14.45	0	0	0	4.03	0	0	0	0	0	0	0	0	0	0	0
Dip-B	Dipeptidase B	FBtr0082832	FBgn0000454	2047	GO:0005737,GO:0008235,GO:0030145,GO:0008239,GO:0008240,GO:0006508		0	0	0	0	0	0	0	0	0	0		0	0	0	0	0	0	0	0	0	0	0	0	0	0	0	0	0.44	0	0	0	0	0	0	0	0	0	0	0	0	0	0	0
Dip-B	Dipeptidase B	FBtr0082833	FBgn0000454	1938	GO:0005737,GO:0008235,GO:0030145,GO:0008239,GO:0008240,GO:0006508		0	0	0	2.99	0	0	0	0	0	0		0.61	0	0	0	0	0	0	0	0	0	0	0	0	0	0	0	0	0	0	0	3.55	0	0	0	0	0	0	16.18	0	0	0	0
Dip-B	Dipeptidase B	FBtr0345229	FBgn0000454	1813	GO:0005737,GO:0008235,GO:0030145,GO:0008239,GO:0008240,GO:0006508		1.49	9.99	19.04	3.03	0.05	0.39	0	2.31	0.4	2.42		2.64	0	0	0	0.3	0.9	0	0.55	0.07	0	1.09	2.14	18.61	51.28	0.15	0	27.12	4.93	1.54	0	0	0.54	0.42	0	17.54	0	13.83	0	1.8	16.69	7.93	2.39
Dip-C	Dipeptidase C	FBtr0082597	FBgn0000455	1747	GO:0030145,GO:0008239,GO:0006508		0	7.6	0	2.32	10.21	4.49	0	16.29	12.2	7.88		7.84	1.52	0.38	0	8.06	0	0	0.37	0	0	10.9	0	0	0.08	0	0	10.6	32.43	0	0.07	3.99	17.94	0	0	0	0	3.87	24.95	0.38	12.27	27.28	0
Dip-C	Dipeptidase C	FBtr0344982	FBgn0000455	1951	GO:0030145,GO:0008239,GO:0006508		8.17	1	6.97	0	0	0	13.5	0.67	0.47	0		0	0	2.02	0	0	0	0	0	38.33	0	0	10.21	0.03	0	0	0	1.79	0	0	0	0	0	0	0.1	22.88	0	2.71	0	0	17.46	0	2.58
disco	disconnected	FBtr0074250	FBgn0000459	3247	GO:0007420,GO:0045494,GO:0003677,GO:0045893,GO:0010906,GO:0008062,GO:0007469,GO:0045944,GO:0045475,GO:0010468,GO:0007623,GO:0007479,GO:0001158,GO:0005634		0	0	0	1.54	0	4.06	0	0	0	0		3.84	0	0	0	0	0	0	0	0	2.17	0.65	0	6.83	0.85	0	0	0	0	0	0	0	0	0.72	0	2.37	0	0	0	0	0	0	0
disco	disconnected	FBtr0100384	FBgn0000459	3067	GO:0007420,GO:0045494,GO:0003677,GO:0045893,GO:0010906,GO:0008062,GO:0007469,GO:0045944,GO:0045475,GO:0010468,GO:0007623,GO:0007479,GO:0001158,GO:0005634		0	0.07	0	0.11	0	5.88	10.32	0	0	0		0	0	0	0.07	0	0	0	1.17	0.04	12.37	0	0	0	0	0.08	0.07	0	0	0	0	0	0.18	0	0	0	0.76	0	0	0.5	0	0	0
Dl	Delta	FBtr0083739	FBgn0000463	5278	GO:0030713,GO:0007474,GO:0008407,GO:0007298,GO:0007464,GO:0008356,GO:0048190,GO:0030720,GO:0007155,GO:0045465,GO:0001708,GO:0007422,GO:0007219,GO:0042676,GO:0007399,GO:0048477,GO:0035157,GO:0007460,GO:0008347,GO:0008586,GO:0016330,GO:0005886,GO:0050768,GO:0007498,GO:0048749,GO:0045931,GO:0035155,GO:0005509,GO:0030431,GO:0005112,GO:0035003,GO:0031410,GO:0036011,GO:0005102,GO:0007015,GO:0005515,GO:…		0	0	0	0	0	0	0	0	0	0		0.16	0.73	0	0	0	0	0	0	0	0	0.89	0	0.24	0	0	0	6.62	0.17	0	0	0	0	2.24	0	0	0	0	0	0	0	0	67.45
Dl	Delta	FBtr0083740	FBgn0000463	3546	GO:0030713,GO:0007474,GO:0008407,GO:0007298,GO:0007464,GO:0008356,GO:0048190,GO:0030720,GO:0007155,GO:0045465,GO:0001708,GO:0007422,GO:0007219,GO:0042676,GO:0007399,GO:0048477,GO:0035157,GO:0007460,GO:0008347,GO:0008586,GO:0016330,GO:0005886,GO:0050768,GO:0007498,GO:0048749,GO:0045931,GO:0035155,GO:0005509,GO:0030431,GO:0005112,GO:0035003,GO:0031410,GO:0036011,GO:0005102,GO:0007015,GO:0005515,GO:…		0	0	0.03	0	0	0	0	0.04	0	0		0	0	4.6	0.25	0.11	0	0	0	0	0	0	0	0.24	0	0	0	7.59	0.37	0	0	0	0	0	0	0	0	0	0	0	0	0	0
Dl	Delta	FBtr0304658	FBgn0000463	4581	GO:0030713,GO:0007474,GO:0008407,GO:0007298,GO:0007464,GO:0008356,GO:0048190,GO:0030720,GO:0007155,GO:0045465,GO:0001708,GO:0007422,GO:0007219,GO:0042676,GO:0007399,GO:0048477,GO:0035157,GO:0007460,GO:0008347,GO:0008586,GO:0016330,GO:0005886,GO:0050768,GO:0007498,GO:0048749,GO:0045931,GO:0035155,GO:0005509,GO:0030431,GO:0005112,GO:0035003,GO:0031410,GO:0036011,GO:0005102,GO:0007015,GO:0005515,GO:…		0	0	0	0	0	0	0	0	0	0		0.16	47.31	0	0	0	3.83	0.03	0	0	0.06	1.07	0	0	0	0	0	0	0.4	0	0	0	0	0	0	0	0	0	0	0	0	0	0
Lar	Leukocyte-antigen-related-like	FBtr0081260	FBgn0000464	7606	GO:0031290,GO:0048841,GO:0005925,GO:0007399,GO:0048675,GO:0048477,GO:0032093,GO:0051124,GO:0005886,GO:0030424,GO:0004725,GO:0008594,GO:0007412,GO:1903386,GO:0007411,GO:0008045,GO:0007283,GO:0006470,GO:0045467,GO:0001700,GO:0005001		4.25	3	1.79	1.61	13.65	0	0.18	3.38	5	3.96		0	0	0	53.54	0	3.6	0.29	4.44	25.11	17.45	1.41	0	0	0	4.46	0	0.91	5.39	2.68	8.73	14.97	0.49	0	0.1	0	0.08	0	0	0	0	0	0
Lar	Leukocyte-antigen-related-like	FBtr0112800	FBgn0000464	8456	GO:0031290,GO:0048841,GO:0005925,GO:0007399,GO:0048675,GO:0048477,GO:0032093,GO:0051124,GO:0005886,GO:0030424,GO:0004725,GO:0008594,GO:0007412,GO:1903386,GO:0007411,GO:0008045,GO:0007283,GO:0006470,GO:0045467,GO:0001700,GO:0005001		0	0	0	0	0	3.37	0	0	0	0		0.33	0	0	0	3.74	0	0	0	0	0	0	1.71	1.61	0.61	0	0	0	0	0	0	0	0	0	0	2.82	0	1.5	0	0.54	0	0	0.87
Lar	Leukocyte-antigen-related-like	FBtr0305950	FBgn0000464	7355	GO:0031290,GO:0048841,GO:0005925,GO:0007399,GO:0048675,GO:0048477,GO:0032093,GO:0051124,GO:0005886,GO:0030424,GO:0004725,GO:0008594,GO:0007412,GO:1903386,GO:0007411,GO:0008045,GO:0007283,GO:0006470,GO:0045467,GO:0001700,GO:0005001		0	0	0	0	0	0	0	0	0	0		0	0	0	0	0	0	0	0	0	0	0	0	0	0	0	0	0	0	0	0.08	0	0	0	0	0	0	0	0	0	0	0	0
Lar	Leukocyte-antigen-related-like	FBtr0331239	FBgn0000464	8424	GO:0031290,GO:0048841,GO:0005925,GO:0007399,GO:0048675,GO:0048477,GO:0032093,GO:0051124,GO:0005886,GO:0030424,GO:0004725,GO:0008594,GO:0007412,GO:1903386,GO:0007411,GO:0008045,GO:0007283,GO:0006470,GO:0045467,GO:0001700,GO:0005001		5.43	6.51	4.43	0	0	38.09	0	14.89	0	7.3		2.22	4.15	0.27	0	48.76	33.56	2.33	4.2	0	46.9	17.44	7.16	0.18	1.15	0	31.94	4.8	10.27	0	22.02	0	6.99	0.83	0	9.27	0	0	0	0	0	0	0
Lar	Leukocyte-antigen-related-like	FBtr0331240	FBgn0000464	8637	GO:0031290,GO:0048841,GO:0005925,GO:0007399,GO:0048675,GO:0048477,GO:0032093,GO:0051124,GO:0005886,GO:0030424,GO:0004725,GO:0008594,GO:0007412,GO:1903386,GO:0007411,GO:0008045,GO:0007283,GO:0006470,GO:0045467,GO:0001700,GO:0005001		7.73	12.19	9.95	7.7	0.12	2.64	6.15	30.83	6.56	22.28		7.11	72.73	68.5	275.4	19.19	12.25	7.67	10.35	20.78	31.78	21.63	45	40.31	29.91	28.92	19.28	2.56	18.57	5.98	10.92	34.37	4.55	21.6	46.79	80.49	236.77	11.85	9.83	11.32	9.25	6.2	48.7
Lar	Leukocyte-antigen-related-like	FBtr0331241	FBgn0000464	7782	GO:0031290,GO:0048841,GO:0005925,GO:0007399,GO:0048675,GO:0048477,GO:0032093,GO:0051124,GO:0005886,GO:0030424,GO:0004725,GO:0008594,GO:0007412,GO:1903386,GO:0007411,GO:0008045,GO:0007283,GO:0006470,GO:0045467,GO:0001700,GO:0005001		10.86	15.28	9.24	2.39	24.96	0.08	2.52	23.7	31.82	9.95		1.39	0.03	0.86	0	3.84	13.63	1.91	0.05	0	5.7	1.59	1.58	5.15	3.47	23.97	0.61	6.93	1.72	0.98	20.26	14.94	0.33	1.33	0	5.92	0	0.86	0.4	0.88	1.24	1.92	1.11
Lar	Leukocyte-antigen-related-like	FBtr0331242	FBgn0000464	8494	GO:0031290,GO:0048841,GO:0005925,GO:0007399,GO:0048675,GO:0048477,GO:0032093,GO:0051124,GO:0005886,GO:0030424,GO:0004725,GO:0008594,GO:0007412,GO:1903386,GO:0007411,GO:0008045,GO:0007283,GO:0006470,GO:0045467,GO:0001700,GO:0005001		65.09	72.36	67.84	55.64	62.93	64.92	31.5	70.01	53.65	82.86		11.73	26.23	106.01	91.04	64.07	104.18	118.74	36.15	23.5	29.31	60.63	77.72	19.84	157.91	89.42	26.82	53.26	44.82	70.51	54.35	41.7	25.23	66.92	31.87	56.78	32.71	10.57	13.87	15.14	16.62	11.95	20.92
Cyp6a2	Cytochrome P450-6a2	FBtr0086133	FBgn0000473	1674	GO:0005506,GO:0055114,GO:0016705,GO:0016491,GO:0031000,GO:0020037,GO:0046680		0.57	0.87	3.6	7.62	3.1	57.02	0.48	0.72	0.06	0		6.6	0	15.84	2.06	1.31	0	0.52	0	0	0	4.68	0	0.16	0	0	0	0.46	4.13	0	2.73	7.6	3.03	0.35	0.12	1.46	0	0	0	0	0	0	0.27
DNaseII	Deoxyribonuclease II	FBtr0083538	FBgn0000477	1228	GO:0006308,GO:0005622,GO:0045476,GO:0004520,GO:0030431,GO:0006309,GO:0004531		1.89	3.33	9.05	0	0.25	0	0.1	6.64	0	0.75		10	0	21.14	0	1.51	0	0	0	1.92	0	0	0	1.73	5.29	0	0	0.09	0	0	0.3	0	4.85	0	0	7.5	0	0	0	7.48	0.97	0	0
dnc	dunce	FBtr0070509	FBgn0000479	4093	GO:0046958,GO:0019933,GO:0045475,GO:0048675,GO:0048477,GO:0048149,GO:0007623,GO:0001661,GO:0007612,GO:0008355,GO:0007613,GO:0004115,GO:0000003,GO:0046331,GO:0072375,GO:0040040,GO:0007617,GO:0007615,GO:0007614,GO:0007611,GO:0010738,GO:0007619,GO:0008306,GO:0007268		171.8	276.07	272.95	212.78	139.45	228.86	170.59	180.04	182.2	140.79		8.25	0	0	0	15.43	29.1	0	0	0	0	0	12.25	0	15.23	0	1.46	0	2.52	0	8.3	15.79	21.72	0	31.87	12.99	0	0	0.1	0	2.21	1.8	0
dnc	dunce	FBtr0070511	FBgn0000479	3834	GO:0046958,GO:0019933,GO:0045475,GO:0048675,GO:0048477,GO:0048149,GO:0007623,GO:0001661,GO:0007612,GO:0008355,GO:0007613,GO:0004115,GO:0000003,GO:0046331,GO:0072375,GO:0040040,GO:0007617,GO:0007615,GO:0007614,GO:0007611,GO:0010738,GO:0007619,GO:0008306,GO:0007268		0	0	0	0	0	11.87	0	0	0	0		0	0	0	0	0	0	0	0	0	0	0	0	0	0	0	0	0	0	0	0	0	0	0	0	0	0	0	0	0	0	0	0.15
dnc	dunce	FBtr0070512	FBgn0000479	3792	GO:0046958,GO:0019933,GO:0045475,GO:0048675,GO:0048477,GO:0048149,GO:0007623,GO:0001661,GO:0007612,GO:0008355,GO:0007613,GO:0004115,GO:0000003,GO:0046331,GO:0072375,GO:0040040,GO:0007617,GO:0007615,GO:0007614,GO:0007611,GO:0010738,GO:0007619,GO:0008306,GO:0007268		0.92	3.01	8.02	9.13	10.04	0	20.09	0.27	0	0		0.08	0	0	0	0	0	1.17	0	0	0	1.01	0	0	0	0	0	0.28	0	0	1.83	0	0	0	0	0	0	0	0	0.19	0	0	5.8
dnc	dunce	FBtr0070513	FBgn0000479	3831	GO:0046958,GO:0019933,GO:0045475,GO:0048675,GO:0048477,GO:0048149,GO:0007623,GO:0001661,GO:0007612,GO:0008355,GO:0007613,GO:0004115,GO:0000003,GO:0046331,GO:0072375,GO:0040040,GO:0007617,GO:0007615,GO:0007614,GO:0007611,GO:0010738,GO:0007619,GO:0008306,GO:0007268		0	0	0	0	0	0	0	0	0	0		0	2.61	0	0	0	0	0	0	0.05	0	0	0	0	0	0	0	0	0	0	0	0	0	0	0	0.11	0	0	0	0	0	0	0
dnc	dunce	FBtr0070515	FBgn0000479	3828	GO:0046958,GO:0019933,GO:0045475,GO:0048675,GO:0048477,GO:0048149,GO:0007623,GO:0001661,GO:0007612,GO:0008355,GO:0007613,GO:0004115,GO:0000003,GO:0046331,GO:0072375,GO:0040040,GO:0007617,GO:0007615,GO:0007614,GO:0007611,GO:0010738,GO:0007619,GO:0008306,GO:0007268		16.81	17.95	25.56	8.93	0.69	0	49.59	4.71	3.48	1.5		0.91	0.05	0	0	0	0	0	0	10.62	0	1.65	1.24	0	2.51	0	0	0	0	0	11.08	0.39	0.47	2.27	0	1.62	0	1.54	0.25	0	0	0.46	39.72
dnc	dunce	FBtr0070517	FBgn0000479	2841	GO:0046958,GO:0019933,GO:0045475,GO:0048675,GO:0048477,GO:0048149,GO:0007623,GO:0001661,GO:0007612,GO:0008355,GO:0007613,GO:0004115,GO:0000003,GO:0046331,GO:0072375,GO:0040040,GO:0007617,GO:0007615,GO:0007614,GO:0007611,GO:0010738,GO:0007619,GO:0008306,GO:0007268		0	0	0	0	0	0	0	0	0	0		0	0	0	0	0	0	0	0	0	0	0	0	0	0	0	0	0	0	0	0	0	0	0	0	0	0	0	0	0	0	0	0
dnc	dunce	FBtr0070518	FBgn0000479	2386	GO:0046958,GO:0019933,GO:0045475,GO:0048675,GO:0048477,GO:0048149,GO:0007623,GO:0001661,GO:0007612,GO:0008355,GO:0007613,GO:0004115,GO:0000003,GO:0046331,GO:0072375,GO:0040040,GO:0007617,GO:0007615,GO:0007614,GO:0007611,GO:0010738,GO:0007619,GO:0008306,GO:0007268		0	0	0	0	0	0	0	0	0	0		0	0	0	11.78	0.69	0	0	0	0	0	0	0	0	0	0	0	0	0	0	0	0	0	0	0	0	0	1.02	0	0	0	0.3	0
dnc	dunce	FBtr0070519	FBgn0000479	11128	GO:0046958,GO:0019933,GO:0045475,GO:0048675,GO:0048477,GO:0048149,GO:0007623,GO:0001661,GO:0007612,GO:0008355,GO:0007613,GO:0004115,GO:0000003,GO:0046331,GO:0072375,GO:0040040,GO:0007617,GO:0007615,GO:0007614,GO:0007611,GO:0010738,GO:0007619,GO:0008306,GO:0007268		18.57	36.01	33.39	1.3	0.5	0	18.03	12.13	2	16.8		3.41	9.95	0.39	0	2.84	0	0.01	7.76	0	3.4	20.71	5.86	7.27	2.44	21.56	0	3.34	7.93	0	9.44	0	0.75	4.98	0	6.81	6.6	0	0.18	0.36	0.94	0	0
dnc	dunce	FBtr0070520	FBgn0000479	2604	GO:0046958,GO:0019933,GO:0045475,GO:0048675,GO:0048477,GO:0048149,GO:0007623,GO:0001661,GO:0007612,GO:0008355,GO:0007613,GO:0004115,GO:0000003,GO:0046331,GO:0072375,GO:0040040,GO:0007617,GO:0007615,GO:0007614,GO:0007611,GO:0010738,GO:0007619,GO:0008306,GO:0007268		0	0	0	0	0	0	0	0	0	0		0.11	0	0	0	0	0	0.68	27.43	0	0	0	0	0	0	0	4.25	0	0	0	0	12.5	0	0	0.28	0	11.73	0	0	6.21	3.36	2.36	0
dnc	dunce	FBtr0070521	FBgn0000479	2435	GO:0046958,GO:0019933,GO:0045475,GO:0048675,GO:0048477,GO:0048149,GO:0007623,GO:0001661,GO:0007612,GO:0008355,GO:0007613,GO:0004115,GO:0000003,GO:0046331,GO:0072375,GO:0040040,GO:0007617,GO:0007615,GO:0007614,GO:0007611,GO:0010738,GO:0007619,GO:0008306,GO:0007268		6.03	2.11	8.23	0.11	143.09	14.61	37.96	5.75	2.19	3.49		3.17	6.27	0	1.55	0.29	0	0.11	0.84	0	53.16	0.65	0.67	4.97	0.46	0.07	0	0.98	0.27	0	0	0	0.63	0.08	0	2.1	0	0	0	0	1.2	0	0
dnc	dunce	FBtr0070522	FBgn0000479	2167	GO:0046958,GO:0019933,GO:0045475,GO:0048675,GO:0048477,GO:0048149,GO:0007623,GO:0001661,GO:0007612,GO:0008355,GO:0007613,GO:0004115,GO:0000003,GO:0046331,GO:0072375,GO:0040040,GO:0007617,GO:0007615,GO:0007614,GO:0007611,GO:0010738,GO:0007619,GO:0008306,GO:0007268		13.88	23.54	11.57	1.4	2.79	7.2	4.06	6.59	13.89	12.15		1.87	0.25	0	0.06	2.01	0	0.41	0.46	0.23	8.27	5.15	10.87	0.3	48.85	2.25	31.87	0.52	0.11	0	3.73	39.29	2.19	2.1	0	10.19	18.49	34.71	29.36	25.83	26.52	29.7	7.48
dnc	dunce	FBtr0333312	FBgn0000479	10159	GO:0046958,GO:0019933,GO:0045475,GO:0048675,GO:0048477,GO:0048149,GO:0007623,GO:0001661,GO:0007612,GO:0008355,GO:0007613,GO:0004115,GO:0000003,GO:0046331,GO:0072375,GO:0040040,GO:0007617,GO:0007615,GO:0007614,GO:0007611,GO:0010738,GO:0007619,GO:0008306,GO:0007268		6.78	9.01	6.49	35.65	86.65	29.12	20.4	10.48	9.51	14.47		1.04	48.44	1.87	13.67	0.34	1.23	1.86	0	40.8	0	12.05	38.52	2.06	35.37	13.96	96.13	5.16	8.53	6.61	7.05	15.84	11.26	9.65	27.11	3.2	0	0.19	0.64	4.11	0.68	1.29	2.68
dnc	dunce	FBtr0333313	FBgn0000479	8328	GO:0046958,GO:0019933,GO:0045475,GO:0048675,GO:0048477,GO:0048149,GO:0007623,GO:0001661,GO:0007612,GO:0008355,GO:0007613,GO:0004115,GO:0000003,GO:0046331,GO:0072375,GO:0040040,GO:0007617,GO:0007615,GO:0007614,GO:0007611,GO:0010738,GO:0007619,GO:0008306,GO:0007268		19.41	19.5	32.21	9.46	50.27	6.02	32.5	24.23	19.89	23.78		31.84	676.87	36.06	9.75	12.18	0.59	138.25	119.73	174.36	344.36	406.14	406.95	237.6	207.17	398.64	53.22	26.42	1.86	11.55	6.63	5.08	28.73	88.92	31.88	116.95	389.72	19.31	11.93	11.19	12.98	12.16	78.77
dnc	dunce	FBtr0333314	FBgn0000479	7521	GO:0046958,GO:0019933,GO:0045475,GO:0048675,GO:0048477,GO:0048149,GO:0007623,GO:0001661,GO:0007612,GO:0008355,GO:0007613,GO:0004115,GO:0000003,GO:0046331,GO:0072375,GO:0040040,GO:0007617,GO:0007615,GO:0007614,GO:0007611,GO:0010738,GO:0007619,GO:0008306,GO:0007268		3.1	4.82	9.41	0.25	2.94	144.42	0.1	2.13	0.77	2.46		5.39	17.65	0	0.42	4.97	4.53	39.49	20.89	186.85	127.04	23.27	25.02	6.52	23.05	2.54	13.81	11	0.63	0.22	9.66	14.04	1.51	19.24	8.15	13.38	73.78	0	0	1.22	0	0	108.42
dnc	dunce	FBtr0333315	FBgn0000479	9576	GO:0046958,GO:0019933,GO:0045475,GO:0048675,GO:0048477,GO:0048149,GO:0007623,GO:0001661,GO:0007612,GO:0008355,GO:0007613,GO:0004115,GO:0000003,GO:0046331,GO:0072375,GO:0040040,GO:0007617,GO:0007615,GO:0007614,GO:0007611,GO:0010738,GO:0007619,GO:0008306,GO:0007268		1.6	0	4.69	23.64	0	4.78	1.74	0	33.1	0		0	0	0	0	0	0	0	0	0	0	0	0	0.49	0	4	0	0	0	0	0	0	2.43	0	0	0.86	0	0	0	2.73	1.06	0	0
dnc	dunce	FBtr0333316	FBgn0000479	8691	GO:0046958,GO:0019933,GO:0045475,GO:0048675,GO:0048477,GO:0048149,GO:0007623,GO:0001661,GO:0007612,GO:0008355,GO:0007613,GO:0004115,GO:0000003,GO:0046331,GO:0072375,GO:0040040,GO:0007617,GO:0007615,GO:0007614,GO:0007611,GO:0010738,GO:0007619,GO:0008306,GO:0007268		159.38	179.28	213.51	169.29	223.11	2.39	37.72	100.96	5.76	23.38		2.56	0	45.75	60.27	0	15.65	15.72	6.64	23.7	9.99	34.09	0	0	0	0	0	0	8.01	11.37	4.27	0	0.43	0	53.71	1	0	0	0	0	0	0	89.75
dnc	dunce	FBtr0333317	FBgn0000479	9456	GO:0046958,GO:0019933,GO:0045475,GO:0048675,GO:0048477,GO:0048149,GO:0007623,GO:0001661,GO:0007612,GO:0008355,GO:0007613,GO:0004115,GO:0000003,GO:0046331,GO:0072375,GO:0040040,GO:0007617,GO:0007615,GO:0007614,GO:0007611,GO:0010738,GO:0007619,GO:0008306,GO:0007268		136.85	154.61	141.66	51.89	44.1	116.61	174.12	113.75	19.6	128.03		5.42	22.34	83.14	0	6.62	1.06	1.03	0.11	0.16	0	8.87	4	9.84	2.46	7.38	2.39	2.51	17.54	0	0	0.06	0	83.42	16.04	19.29	159.22	1.17	0.21	0	0	4	33.49
dor	deep orange	FBtr0070269	FBgn0000482	3161	GO:0007298,GO:0005764,GO:0007220,GO:0006904,GO:0008333,GO:0007040,GO:0016197,GO:0061357,GO:0030897,GO:0051301,GO:0009267,GO:0008057,GO:0006728,GO:0097352,GO:0005515,GO:0006622,GO:0005768,GO:0006727,GO:0006726,GO:0033263,GO:0045022,GO:0007041,GO:0030674,GO:0008270,GO:0006897,GO:0035542,GO:0045202,GO:0048072,GO:0008340,GO:0045746,GO:0032456,GO:0019905,GO:0007032		14.53	17.16	9.78	5.14	0	11.2	3.27	23.82	11.72	4.66		3.12	0	4.81	0	40.23	21.9	0	3.08	0.04	0	5.82	0.04	1.22	6.65	1.09	3.78	2.39	3	4.03	3.01	27.02	3.96	1.75	17.89	21.52	12.07	1.01	3.96	2.62	0.21	3.46	0.25
Pka-C3	Protein kinase, cAMP-dependent, catalytic subunit 3	FBtr0075528	FBgn0000489	2003	GO:0004691,GO:0005524,GO:0004674,GO:0005952,GO:0005515,GO:0006468,GO:0007476		1.11	0	0	0	0	0	0	0	0	0		0	0	0	0	0	0	0.21	0	0	36.29	0	0	0	0	0	0	0	0	0	0	0	0	0	0	14.91	23.41	0	0	4.7	0	0	0
Pka-C3	Protein kinase, cAMP-dependent, catalytic subunit 3	FBtr0075529	FBgn0000489	2881	GO:0004691,GO:0005524,GO:0004674,GO:0005952,GO:0005515,GO:0006468,GO:0007476		200.83	245.59	222.82	252.45	258.97	207.47	293.76	0.45	1.69	0.97		20.28	0.09	0.07	0	0	0	0	0.79	1.88	9.32	46.35	64.84	51.52	3.91	0.27	16.45	5.02	0	0.84	0	0	26.33	7.68	0.07	0.34	0	0	0.35	1.27	1.33	0.13	1.31
dpp	decapentaplegic	FBtr0077771	FBgn0000490	3723	GO:0046620,GO:0007444,GO:0008083,GO:0007474,GO:0007443,GO:0001715,GO:0007391,GO:0008354,GO:0035222,GO:0061353,GO:0008201,GO:0061327,GO:0007448,GO:0035156,GO:0042078,GO:0030721,GO:0008285,GO:0007507,GO:0005622,GO:0030509,GO:0008360,GO:0035309,GO:0007378,GO:0007473,GO:0007447,GO:0005518,GO:0001708,GO:0045476,GO:0010002,GO:0007354,GO:0007304,GO:0045570,GO:0061320,GO:0048100,GO:0010862,GO:0008586,GO:…		0	0.03	0	0	0	0	0	0	0	0		0.1	0	0	0	0	0	0	0	0	15.64	0	0	0	0	0	0	0	0	0	0	0	0	0	0	0	0	0	0	0	0	0	0
dpp	decapentaplegic	FBtr0077772	FBgn0000490	3177	GO:0046620,GO:0007444,GO:0008083,GO:0007474,GO:0007443,GO:0001715,GO:0007391,GO:0008354,GO:0035222,GO:0061353,GO:0008201,GO:0061327,GO:0007448,GO:0035156,GO:0042078,GO:0030721,GO:0008285,GO:0007507,GO:0005622,GO:0030509,GO:0008360,GO:0035309,GO:0007378,GO:0007473,GO:0007447,GO:0005518,GO:0001708,GO:0045476,GO:0010002,GO:0007354,GO:0007304,GO:0045570,GO:0061320,GO:0048100,GO:0010862,GO:0008586,GO:…		0	0	0	0	0	0	0	0.73	0.06	0		0.05	0.04	0	0	0	0	3.75	0.08	0	0	0	0	0	0	0	0	0	0	0	0	0	0	0	0	0	0	0	0	0	0	0	0
dpp	decapentaplegic	FBtr0077773	FBgn0000490	4230	GO:0046620,GO:0007444,GO:0008083,GO:0007474,GO:0007443,GO:0001715,GO:0007391,GO:0008354,GO:0035222,GO:0061353,GO:0008201,GO:0061327,GO:0007448,GO:0035156,GO:0042078,GO:0030721,GO:0008285,GO:0007507,GO:0005622,GO:0030509,GO:0008360,GO:0035309,GO:0007378,GO:0007473,GO:0007447,GO:0005518,GO:0001708,GO:0045476,GO:0010002,GO:0007354,GO:0007304,GO:0045570,GO:0061320,GO:0048100,GO:0010862,GO:0008586,GO:…		0	0	0	0	0	0	0	0	0	0		0.32	0	0	0	0	0	0	0	0	0	8.17	0	0	0	0	0	1.56	0	0	0	0	0	0	0	0	0	0	0	0	0	0	0
dpp	decapentaplegic	FBtr0077775	FBgn0000490	3216	GO:0046620,GO:0007444,GO:0008083,GO:0007474,GO:0007443,GO:0001715,GO:0007391,GO:0008354,GO:0035222,GO:0061353,GO:0008201,GO:0061327,GO:0007448,GO:0035156,GO:0042078,GO:0030721,GO:0008285,GO:0007507,GO:0005622,GO:0030509,GO:0008360,GO:0035309,GO:0007378,GO:0007473,GO:0007447,GO:0005518,GO:0001708,GO:0045476,GO:0010002,GO:0007354,GO:0007304,GO:0045570,GO:0061320,GO:0048100,GO:0010862,GO:0008586,GO:…		0	0	0	0	0	0	0	0	0	0		0	0	0	0	0	0	0	0	0	0	0	0	0	0	0	0	0	0	0	0	0	0	0	0	0	0	0	0	0	0	0	0
Dr	Drop	FBtr0085441	FBgn0000492	2552	GO:0007400,GO:0035222,GO:0007420,GO:0009953,GO:0035309,GO:0043565,GO:0007517,GO:0007417,GO:0021782,GO:0007485,GO:0007389,GO:0010906,GO:0007398,GO:0007476,GO:0006355,GO:0007450,GO:0010629,GO:0005634,GO:0007419,GO:0042659		0	0	0	0	0	0	8.05	0	0.08	0		1.09	0	0	0	0.05	0	0	0	0	0	0	0	2.09	0	0	0	0	0	0	0	0	0.19	0.61	0	2.66	0.18	0	0	0	0	0	0
dsh	dishevelled	FBtr0073454	FBgn0000499	2844	GO:0000132,GO:0031290,GO:0046847,GO:0003136,GO:0007391,GO:0005737,GO:0007298,GO:0007464,GO:0007507,GO:0070300,GO:0035309,GO:0090163,GO:0008104,GO:0016055,GO:0048106,GO:0030032,GO:0016348,GO:0048675,GO:0048477,GO:0007394,GO:0045773,GO:0035159,GO:0001737,GO:0007164,GO:0005886,GO:0045198,GO:0008585,GO:0060914,GO:0060071,GO:0005112,GO:0016477,GO:0035019,GO:0016201,GO:0048076,GO:0005109,GO:0048730,GO:…		14.35	17.14	10.94	5.4	4.99	0.82	3.07	23.38	5.55	14.43		7.36	0	0.99	0.55	15.22	21.13	3.61	0.93	1.59	9.07	22.68	10.05	4.04	41.17	4.26	2.22	17.26	8.74	2.82	5.06	6.67	11.59	29.23	4.28	20.09	0.66	2.58	0.7	0.87	0.48	0.52	4.04
Dsk	Drosulfakinin	FBtr0078989	FBgn0000500	569	GO:0007528,GO:0008345,GO:0006940,GO:0008343,GO:0005615,GO:0008344,GO:0005184,GO:0033555,GO:0007218,GO:0071855,GO:0007204		0	0	0	0	0	0	0	0	0	0		0.3	0	0	0	0	0	0	0	0	0	0	0	0	0	0	0	0	0	0	0	0	0	0	0	1.06	0	0	0	0	0	0	0
dsx	doublesex	FBtr0081759	FBgn0000504	4010	GO:0045497,GO:0019101,GO:0046660,GO:0007530,GO:0045496,GO:0045944,GO:0000977,GO:0007486,GO:0045893,GO:0042803,GO:0001078,GO:0007485,GO:0048086,GO:0001077,GO:0046661,GO:0005515,GO:0016199,GO:0045433,GO:0045892,GO:0008049,GO:0018993,GO:0048071,GO:0045498,GO:0006357,GO:0008270,GO:0007619,GO:0005634,GO:0035215		0	0	0	0	0	0	0	0	0	0		0	0	0	0	0	0	0	0	0	0	0	0	0	0	0	0	0	0	0	0	0	0	0	0	0	0	0	0	0	0	0	0
dsx	doublesex	FBtr0081760	FBgn0000504	3627	GO:0045497,GO:0019101,GO:0046660,GO:0007530,GO:0045496,GO:0045944,GO:0000977,GO:0007486,GO:0045893,GO:0042803,GO:0001078,GO:0007485,GO:0048086,GO:0001077,GO:0046661,GO:0005515,GO:0016199,GO:0045433,GO:0045892,GO:0008049,GO:0018993,GO:0048071,GO:0045498,GO:0006357,GO:0008270,GO:0007619,GO:0005634,GO:0035215		0	0	0	0	0	0	0	0	0	0		0.65	0	0	0	0	0	0	0	0	0	0	0	0	0.79	0	0	0	0	0	0	0	0	0	0	0	0	0	0	0	0	0	0
dsx	doublesex	FBtr0081761	FBgn0000504	3238	GO:0045497,GO:0019101,GO:0046660,GO:0007530,GO:0045496,GO:0045944,GO:0000977,GO:0007486,GO:0045893,GO:0042803,GO:0001078,GO:0007485,GO:0048086,GO:0001077,GO:0046661,GO:0005515,GO:0016199,GO:0045433,GO:0045892,GO:0008049,GO:0018993,GO:0048071,GO:0045498,GO:0006357,GO:0008270,GO:0007619,GO:0005634,GO:0035215		0.13	0.03	0.07	0	0	0	0	0	0	0		0.53	7.55	0	0	0	0	0	2	0	0.42	2.57	0	5.15	0.34	0.08	0	1.76	0	0	0	0	1.41	0	0	0	0	0	0	0	0	0	0.05
dsx	doublesex	FBtr0330073	FBgn0000504	3621	GO:0045497,GO:0019101,GO:0046660,GO:0007530,GO:0045496,GO:0045944,GO:0000977,GO:0007486,GO:0045893,GO:0042803,GO:0001078,GO:0007485,GO:0048086,GO:0001077,GO:0046661,GO:0005515,GO:0016199,GO:0045433,GO:0045892,GO:0008049,GO:0018993,GO:0048071,GO:0045498,GO:0006357,GO:0008270,GO:0007619,GO:0005634,GO:0035215		0	0	0	0	0	0	0	0	0	0		0	0	0	0	0	0	0	0	0	0	0	0	0	0	0	0	2.04	0	0	0	0	0	0	0	0	0	0	0	0	0	0	0
dsx	doublesex	FBtr0330074	FBgn0000504	4010	GO:0045497,GO:0019101,GO:0046660,GO:0007530,GO:0045496,GO:0045944,GO:0000977,GO:0007486,GO:0045893,GO:0042803,GO:0001078,GO:0007485,GO:0048086,GO:0001077,GO:0046661,GO:0005515,GO:0016199,GO:0045433,GO:0045892,GO:0008049,GO:0018993,GO:0048071,GO:0045498,GO:0006357,GO:0008270,GO:0007619,GO:0005634,GO:0035215		0	0	0	0	0	0	0	0	0	0		0	0	0	0	0	0	0	0	0	0	0	0	0	0	0	0	0	0	0	0	0	0	0	0	0	0	0	0	0	0	0	0
dsx	doublesex	FBtr0339710	FBgn0000504	6941	GO:0045497,GO:0019101,GO:0046660,GO:0007530,GO:0045496,GO:0045944,GO:0000977,GO:0007486,GO:0045893,GO:0042803,GO:0001078,GO:0007485,GO:0048086,GO:0001077,GO:0046661,GO:0005515,GO:0016199,GO:0045433,GO:0045892,GO:0008049,GO:0018993,GO:0048071,GO:0045498,GO:0006357,GO:0008270,GO:0007619,GO:0005634,GO:0035215		0	0	0	0	0	0	0	0	0	0		0	0	0	0	0	0	0	0	0	0	0.91	0	0	0	0	0	2.99	0	0	0	0	0	0	0	0	0	0	0	0	0	0	0
dwg	deformed wings	FBtr0070487	FBgn0000520	2002	GO:0000790,GO:0003677,GO:0043035,GO:0005515,GO:0008270,GO:0005634		7.31	3.1	1.21	7.87	0	0	0.91	0.59	0.31	4.6		2.82	0	0	0	3.51	5.36	0.28	0.72	0.13	0	0.32	10.79	0.39	0	0	1.87	0.45	4.62	0.5	13.57	0.37	3.88	0	0.89	16.08	7.65	0.15	0	0	3.22	0	0.04
dx	deltex	FBtr0070914	FBgn0000524	3828	GO:0045747,GO:0005737,GO:0007220,GO:0016055,GO:0007219,GO:0035220,GO:0016348,GO:0008593,GO:0005112,GO:0061630,GO:0016567,GO:0006897,GO:0008270,GO:0045746		0	0	0.3	0	0	0.02	0	0.04	0	0.66		5.66	0.07	0.78	0	0	0.25	0	0	0	0	0	0.75	0.69	3.93	0.03	0	2.79	0.55	0.95	0	0	3.96	0	0	0	0	0	0	0	0	0	0
e	ebony	FBtr0084106	FBgn0000527	3142	GO:0005737,GO:0043042,GO:0048022,GO:0045475,GO:0048082,GO:0007623,GO:0048067,GO:0048066,GO:0003833,GO:0001692,GO:0048085,GO:0042440,GO:0042417,GO:0006583,GO:0007593		0.55	0.31	0	0	0	0	0.04	1.74	0	0		4.48	0	0	0	0	0	0	0.72	0	0	0	0.59	1.31	9.9	0	0	0	0	0	0	0	23.56	0.43	0	0.36	0	0	0	0	0	0	0
bsh	brain-specific homeobox	FBtr0089320	FBgn0000529	2012	GO:0007420,GO:0048663,GO:0043565,GO:0003700,GO:0006355,GO:0005634		0	0	0	0	0	0	0	0	0	0		1.84	67.87	0	0.11	0	0	2.83	6.31	32.69	8.4	47.12	0.2	0	0	0	0	0	0	0	0	0	0	0	0	0	0	0	0	0	0	0	12.83
bsh	brain-specific homeobox	FBtr0343855	FBgn0000529	1503	GO:0007420,GO:0048663,GO:0043565,GO:0003700,GO:0006355,GO:0005634		0.72	0	0.91	0	0	0	0	0	0	0		4.12	0	0.29	0	0	0	7.14	0	0	0	37.31	0	0.05	0	0	0	0	0	0	0	0	0	0.13	0	0	0	0	0	0	0	0	0
ea	easter	FBtr0083083	FBgn0000533	1430	GO:0098595,GO:0004175,GO:0007311,GO:0006508,GO:0008063,GO:0004252,GO:0009950		0	0	0	0	0	0	0	0	0	0		0.05	0	0	0	0	0	0	0	0	0	0	0	0	0	0	0	0	0	0	0	0	0	0	0	0	0	2.93	4.12	9.55	0	0	0
ea	easter	FBtr0334588	FBgn0000533	1527	GO:0098595,GO:0004175,GO:0007311,GO:0006508,GO:0008063,GO:0004252,GO:0009950		0	0	0	0	0	0	0	0	0	0		0	0	0	0	0	0	0	0	0	0	0	0	0	0	0	0	0	0	0	0	0	0	0	0	0	0	0	0	0	0	0	0
eag	ether a go-go	FBtr0073955	FBgn0000535	9215	GO:0006813,GO:0000155,GO:0048150,GO:0042066,GO:0005886,GO:0042391,GO:0008076,GO:0007608,GO:0007612,GO:0022843,GO:0008016,GO:0051259,GO:0007629,GO:0000160,GO:0007611,GO:0055085,GO:0007619,GO:0005249		15.58	2.97	21.33	92.04	143.63	196.29	137.31	24.64	0	0		4.77	138.11	0	90.36	68.92	0	51.76	51.38	228.54	102.31	61.64	0	0.12	135.25	149.45	149.65	6.47	0.81	0.12	9.5	13.2	10.93	24.53	5.34	6.45	100.7	3.62	4.12	5.68	4.64	2.03	33.55
eag	ether a go-go	FBtr0111009	FBgn0000535	9503	GO:0006813,GO:0000155,GO:0048150,GO:0042066,GO:0005886,GO:0042391,GO:0008076,GO:0007608,GO:0007612,GO:0022843,GO:0008016,GO:0051259,GO:0007629,GO:0000160,GO:0007611,GO:0055085,GO:0007619,GO:0005249		0	0	0	0	0	7.07	0	4.9	0	0		2.36	0	0.51	0	0	16.49	0	0	0	0	0	0	2	0.05	0	0	0	0	0	0.77	0	0.49	0	0	0	0	0	0	0	0	0	0
eag	ether a go-go	FBtr0303285	FBgn0000535	3649	GO:0006813,GO:0000155,GO:0048150,GO:0042066,GO:0005886,GO:0042391,GO:0008076,GO:0007608,GO:0007612,GO:0022843,GO:0008016,GO:0051259,GO:0007629,GO:0000160,GO:0007611,GO:0055085,GO:0007619,GO:0005249		0.03	0	6.04	16.27	0	20.63	17.24	7.35	0	0		0	41.84	0	0	1.19	0.7	0	11.28	0	1.59	0	0	0.01	0	0	0	0	0	0	0	0	1.11	0	0	0	0.45	0	0	0.25	0	0	0
eag	ether a go-go	FBtr0303286	FBgn0000535	9497	GO:0006813,GO:0000155,GO:0048150,GO:0042066,GO:0005886,GO:0042391,GO:0008076,GO:0007608,GO:0007612,GO:0022843,GO:0008016,GO:0051259,GO:0007629,GO:0000160,GO:0007611,GO:0055085,GO:0007619,GO:0005249		3.69	14.08	14.84	1.75	0	0	0	7.61	3.45	11.15		1.51	0	90.44	0	7.05	0	1.85	0	0	0.93	0	0	0	2.27	0	0	0	0	0	0	0	2.14	0	0	12.22	0	0	0	0	0	2.37	0
eag	ether a go-go	FBtr0310014	FBgn0000535	3643	GO:0006813,GO:0000155,GO:0048150,GO:0042066,GO:0005886,GO:0042391,GO:0008076,GO:0007608,GO:0007612,GO:0022843,GO:0008016,GO:0051259,GO:0007629,GO:0000160,GO:0007611,GO:0055085,GO:0007619,GO:0005249		6.08	3.54	0.2	0	38.23	0.01	0	49.63	19.26	36.48		1.36	2.52	25.12	72.14	1.63	44.05	3.29	0	77.74	20.32	15.18	40.88	3.98	38.82	2.95	1.17	0.78	2.21	0	0.74	0	0	12.69	21.4	6.97	26.6	0.84	0	0	0	0.14	10.09
eag	ether a go-go	FBtr0310015	FBgn0000535	3670	GO:0006813,GO:0000155,GO:0048150,GO:0042066,GO:0005886,GO:0042391,GO:0008076,GO:0007608,GO:0007612,GO:0022843,GO:0008016,GO:0051259,GO:0007629,GO:0000160,GO:0007611,GO:0055085,GO:0007619,GO:0005249		0	1.91	0	0	0	0	0	7.71	3.78	0		1.64	0	0	0	0	0	0	0	0	0	0	4.56	0	0	0	0.45	0	0	0	0	0	0	0	0	1.45	0	0	0	1.91	0	0	0
eag	ether a go-go	FBtr0310016	FBgn0000535	9455	GO:0006813,GO:0000155,GO:0048150,GO:0042066,GO:0005886,GO:0042391,GO:0008076,GO:0007608,GO:0007612,GO:0022843,GO:0008016,GO:0051259,GO:0007629,GO:0000160,GO:0007611,GO:0055085,GO:0007619,GO:0005249		13	19.44	2.73	2.92	59.63	0	25.84	106.26	76.56	69.17		9.41	30.96	6.39	0	20.21	89.25	0	0	0	0	83.39	87.18	59.05	28.04	2	61.12	0	0	0	2.8	2.45	11.69	0.59	0.76	27.26	0	0	0	0	0	0	18.17
eas	easily shocked	FBtr0074211	FBgn0000536	2263	GO:0046959,GO:0005737,GO:0007420,GO:0046337,GO:0004103,GO:0016310,GO:0055059,GO:0016319,GO:0009612,GO:0001666,GO:0007638,GO:0004305,GO:0007616,GO:0008306		0	0	0	0	0	0	0	0	0	0.45		0	0	0	0	0	0	0	0	0	0	0	0	0	10.94	0	0	0.47	0	0	0	0	0	0	2.58	0	0	0	0	0	0	0.05	0
eas	easily shocked	FBtr0074212	FBgn0000536	2195	GO:0046959,GO:0005737,GO:0007420,GO:0046337,GO:0004103,GO:0016310,GO:0055059,GO:0016319,GO:0009612,GO:0001666,GO:0007638,GO:0004305,GO:0007616,GO:0008306		16.37	9.71	5.2	2.03	0	3.62	0	2.99	13.27	0		4.27	0.25	0	282.43	0	10.65	14.82	0	7.09	0	0	0	8.89	6.11	3.62	0	3.57	6.8	0	0	0	6.24	20.44	0	2.95	26.8	2.61	10.98	0	8.57	0	1.58
eas	easily shocked	FBtr0074214	FBgn0000536	2395	GO:0046959,GO:0005737,GO:0007420,GO:0046337,GO:0004103,GO:0016310,GO:0055059,GO:0016319,GO:0009612,GO:0001666,GO:0007638,GO:0004305,GO:0007616,GO:0008306		0	2.47	0	0	0	0	0.14	0	0	0		0.29	0	0	0	0	0	0	0	0	0.58	3.14	3.03	0	0	0	0	0	2.86	0	8.26	0	0	0	0	1.2	0	0	0.16	0	0	0	0
eas	easily shocked	FBtr0308617	FBgn0000536	4627	GO:0046959,GO:0005737,GO:0007420,GO:0046337,GO:0004103,GO:0016310,GO:0055059,GO:0016319,GO:0009612,GO:0001666,GO:0007638,GO:0004305,GO:0007616,GO:0008306		9.19	10.96	14.02	0	0	0	0.23	2.63	1.84	12.13		2.59	0	0	0	5.95	12.08	0	0	0	0	10.75	0	5.43	11.88	0	0	4.91	6.03	2.38	6.13	0	4.9	16.68	0	11.43	0	0	0	2	0	0	0
eas	easily shocked	FBtr0308618	FBgn0000536	2442	GO:0046959,GO:0005737,GO:0007420,GO:0046337,GO:0004103,GO:0016310,GO:0055059,GO:0016319,GO:0009612,GO:0001666,GO:0007638,GO:0004305,GO:0007616,GO:0008306		0	0	0	0	0	0	0	0	0	0		0	0	0	0.17	0	0	0	0	0	0	0	0	0	0	0	0	0	0	0	0	0	0	0	0	0	0	0	0	0	0	0	0
eas	easily shocked	FBtr0308619	FBgn0000536	2401	GO:0046959,GO:0005737,GO:0007420,GO:0046337,GO:0004103,GO:0016310,GO:0055059,GO:0016319,GO:0009612,GO:0001666,GO:0007638,GO:0004305,GO:0007616,GO:0008306		0	0	0	0	0	0	0	0	0	0		0	0	0	0	0	0	0	0	0	0	0	0	0	0	0	0	0	0	0	0	0	0	0	0	0	0	0	0	0	0	0	0
eas	easily shocked	FBtr0343519	FBgn0000536	2331	GO:0046959,GO:0005737,GO:0007420,GO:0046337,GO:0004103,GO:0016310,GO:0055059,GO:0016319,GO:0009612,GO:0001666,GO:0007638,GO:0004305,GO:0007616,GO:0008306		0	0	0	0	0	0	0	0	0	0		0	0	0	0	0	0	0	0	0	0	0	0	0	0	0	0	0	0	0	0	0	0	0	0	0	0	0	0	0	0	0	0
eas	easily shocked	FBtr0343520	FBgn0000536	4575	GO:0046959,GO:0005737,GO:0007420,GO:0046337,GO:0004103,GO:0016310,GO:0055059,GO:0016319,GO:0009612,GO:0001666,GO:0007638,GO:0004305,GO:0007616,GO:0008306		0	0	0	1.62	1.81	3.15	0	3.37	1.42	0		0	0	15.09	232.3	0	0	11.32	0.11	0.28	0.23	0	2.49	0	0	0	5.38	0	0	0	0	0.62	0	0	0.79	0	8.84	0	0.87	0	0.13	0.6	0
E(bx)	Enhancer of bithorax	FBtr0072521	FBgn0000541	9020	GO:0042766,GO:0016922,GO:0006338,GO:0035064,GO:0046983,GO:0035076,GO:0046426,GO:0070615,GO:0048515,GO:0007095,GO:0045747,GO:0016589,GO:0010468,GO:0006351,GO:0048813,GO:0035073,GO:0006325,GO:0046331,GO:0070577,GO:0006357,GO:0030097,GO:0045824		29.74	0	0	0	0	0	0	0	14.56	0		0	0	0	0	0	0	0	0	0	0	0	0	0	0	0	0	0	0	0	0	46.11	18.25	0	0	0	315.68	0	0	0	0	0	0
E(bx)	Enhancer of bithorax	FBtr0072522	FBgn0000541	8960	GO:0042766,GO:0016922,GO:0006338,GO:0035064,GO:0046983,GO:0035076,GO:0046426,GO:0070615,GO:0048515,GO:0007095,GO:0045747,GO:0016589,GO:0010468,GO:0006351,GO:0048813,GO:0035073,GO:0006325,GO:0046331,GO:0070577,GO:0006357,GO:0030097,GO:0045824		2.51	2.65	3.82	0	0.62	0	0	0	0	0		3.34	4.07	79.67	0	0.04	40.59	0	1.65	0	0	0.93	0	0	68.47	0	0	0	0	0	0	0.1	0	3.41	0	0	0	3.19	0	4.99	0	0	0
E(bx)	Enhancer of bithorax	FBtr0072523	FBgn0000541	7834	GO:0042766,GO:0016922,GO:0006338,GO:0035064,GO:0046983,GO:0035076,GO:0046426,GO:0070615,GO:0048515,GO:0007095,GO:0045747,GO:0016589,GO:0010468,GO:0006351,GO:0048813,GO:0035073,GO:0006325,GO:0046331,GO:0070577,GO:0006357,GO:0030097,GO:0045824		9.65	14.02	13.53	0.7	0	0	0	22.77	5.11	8.78		2.78	0	0	0	14.72	16.92	0	0.33	6.47	0	3.37	0	0	12.65	0	2.66	7.93	0.94	0	4.7	3.37	22.9	16.09	4.65	0.5	7.09	0.83	0	0.91	0	0	0
E(bx)	Enhancer of bithorax	FBtr0301348	FBgn0000541	8975	GO:0042766,GO:0016922,GO:0006338,GO:0035064,GO:0046983,GO:0035076,GO:0046426,GO:0070615,GO:0048515,GO:0007095,GO:0045747,GO:0016589,GO:0010468,GO:0006351,GO:0048813,GO:0035073,GO:0006325,GO:0046331,GO:0070577,GO:0006357,GO:0030097,GO:0045824		0	0	0	0	0	0	0	0	0	0		0.67	0	0	0	13.69	40.12	0	0	0	0	0	0	0	53.59	0	0	0	101.48	0	3.45	0.02	0	1.26	0	0	0	0	0	0	1.35	0	0
E(bx)	Enhancer of bithorax	FBtr0301349	FBgn0000541	7362	GO:0042766,GO:0016922,GO:0006338,GO:0035064,GO:0046983,GO:0035076,GO:0046426,GO:0070615,GO:0048515,GO:0007095,GO:0045747,GO:0016589,GO:0010468,GO:0006351,GO:0048813,GO:0035073,GO:0006325,GO:0046331,GO:0070577,GO:0006357,GO:0030097,GO:0045824		0	7.39	1.88	3.44	11.17	17.35	93.6	5.22	2	10.97		2.63	2.62	75.82	1.43	1.42	0.38	5.52	0.7	0	0	5.53	8.5	17.11	0	21.05	5.42	13.2	0	1.19	0	0	0	0.5	0.65	19.19	0	2.29	1.17	0	1.49	0.19	8.12
E(bx)	Enhancer of bithorax	FBtr0332101	FBgn0000541	8652	GO:0042766,GO:0016922,GO:0006338,GO:0035064,GO:0046983,GO:0035076,GO:0046426,GO:0070615,GO:0048515,GO:0007095,GO:0045747,GO:0016589,GO:0010468,GO:0006351,GO:0048813,GO:0035073,GO:0006325,GO:0046331,GO:0070577,GO:0006357,GO:0030097,GO:0045824		39.36	33.36	41.74	26.78	29.61	119.74	19.53	34.39	8.44	60.59		9.51	0	9.51	57.04	23.79	1.54	0	4.56	0	2.7	20.88	2.9	9.41	77.46	266.72	0	19.17	1.16	5.2	56.61	2.77	3.96	6.38	12.22	35.54	31.12	0	0	0	0	0	0
E(bx)	Enhancer of bithorax	FBtr0332102	FBgn0000541	9296	GO:0042766,GO:0016922,GO:0006338,GO:0035064,GO:0046983,GO:0035076,GO:0046426,GO:0070615,GO:0048515,GO:0007095,GO:0045747,GO:0016589,GO:0010468,GO:0006351,GO:0048813,GO:0035073,GO:0006325,GO:0046331,GO:0070577,GO:0006357,GO:0030097,GO:0045824		8.3	11.34	13.22	34.22	4.71	10.83	31.49	24.59	5.99	6.59		6.55	6.51	95.62	23.27	8.47	13.86	5.19	2.76	0	0	24.3	1.74	14.96	42.62	5.46	2.55	10.79	2.66	1.56	13.49	18.73	8.78	22.66	0	31.28	19.53	0	0	0	0	0.87	0
E(bx)	Enhancer of bithorax	FBtr0332103	FBgn0000541	8605	GO:0042766,GO:0016922,GO:0006338,GO:0035064,GO:0046983,GO:0035076,GO:0046426,GO:0070615,GO:0048515,GO:0007095,GO:0045747,GO:0016589,GO:0010468,GO:0006351,GO:0048813,GO:0035073,GO:0006325,GO:0046331,GO:0070577,GO:0006357,GO:0030097,GO:0045824		0	0	0	0	0	0	22.7	0	61.19	5.23		0.46	0	0	0	0	0	0	0	0	0	0	0	0	43	0	0	0.55	0	0	0	0	1.58	1.97	0	0	0	0	0	0	2.63	0	0
E(bx)	Enhancer of bithorax	FBtr0332104	FBgn0000541	8517	GO:0042766,GO:0016922,GO:0006338,GO:0035064,GO:0046983,GO:0035076,GO:0046426,GO:0070615,GO:0048515,GO:0007095,GO:0045747,GO:0016589,GO:0010468,GO:0006351,GO:0048813,GO:0035073,GO:0006325,GO:0046331,GO:0070577,GO:0006357,GO:0030097,GO:0045824		68.36	117.46	93.87	93.71	98.91	2.71	57.5	111.62	0	87.24		29.66	94.59	315.26	151.63	78.45	92.99	104.7	98.19	58.53	61.91	110.62	145.1	128.32	0	0	128.87	54.91	0	104.89	22.02	29.17	26.47	150.46	133.55	75.95	0	0	2.62	0	1.95	0.97	15.19
ec	echinus	FBtr0070606	FBgn0000542	6759	GO:0046672,GO:0046666,GO:0016579,GO:0046667,GO:0008157,GO:0004843,GO:0016318		0	0	0	0	0	0	0	0	0	0		0	0	0	0	0	0	0	0	0	0	0.71	0	0	0	0	0	0	0	0	0	0	0	0	0	0	0	0	0	0	0	0	0
ec	echinus	FBtr0112801	FBgn0000542	6863	GO:0046672,GO:0046666,GO:0016579,GO:0046667,GO:0008157,GO:0004843,GO:0016318		0	0	0	0	0	0	0	0	0	0		0	0	0	0	0	0	0	0	0	0	0	0	0	0	0	0	0	0	0	0	0	0	0	0	0	0	0	0	0	0	0	0
ec	echinus	FBtr0112802	FBgn0000542	6681	GO:0046672,GO:0046666,GO:0016579,GO:0046667,GO:0008157,GO:0004843,GO:0016318		0.01	0	0.11	0	2.83	0	0.02	0.17	0	0		0.06	0	0	0.03	0	0	0.02	0	0	0.02	0	0	0.01	0.04	0.04	0	0.03	0.04	0	0.02	0.02	0.04	0	1.74	0	0	0	0	0	0	0	0
ecd	ecdysoneless	FBtr0072903	FBgn0000543	2204	GO:0007443,GO:0005737,GO:0008258,GO:0007390,GO:0070990,GO:0048477,GO:0009608,GO:0048542,GO:0007030,GO:0016319,GO:1903220,GO:0006697,GO:0000398,GO:0008362,GO:0007281,GO:0002165,GO:0007591,GO:0007458,GO:0005634,GO:0006366,GO:0003713,GO:0002168		1.98	6.58	5.51	1.08	1.81	2.1	0	6.49	0	4.2		1.59	1.19	0	0	10.65	0.62	0	1.38	0	0	0	4.54	0	0	0	0	4.81	19.25	0	9.75	2.13	0	0	0	0	0	1.37	0.47	6.93	0.32	5.83	3.8
EcR	Ecdysone receptor	FBtr0086008	FBgn0000546	5108	GO:0030425,GO:0035053,GO:0007561,GO:0007443,GO:0008258,GO:0005737,GO:0035188,GO:0048666,GO:1904799,GO:0007390,GO:0006914,GO:0007488,GO:0007298,GO:0005496,GO:0004884,GO:0035297,GO:0070491,GO:0045938,GO:0007286,GO:0008544,GO:0007155,GO:0045944,GO:0007422,GO:0010002,GO:0007468,GO:0016322,GO:0006911,GO:0040034,GO:0003677,GO:0048477,GO:0008230,GO:0007406,GO:0035075,GO:0045893,GO:0008232,GO:0010506,GO:…		0.79	4.3	3.44	11.15	1.73	0.57	0.96	49.13	0.62	3.67		1.55	0.3	32.37	0	19.72	3.13	0	0	0	0	17.39	1.02	1.02	14.78	0.82	0.18	7.23	5.87	18.77	1.57	21.16	0.88	20.29	32.06	18.35	0	0	0	0	2.89	0	0.05
EcR	Ecdysone receptor	FBtr0086009	FBgn0000546	3740	GO:0030425,GO:0035053,GO:0007561,GO:0007443,GO:0008258,GO:0005737,GO:0035188,GO:0048666,GO:1904799,GO:0007390,GO:0006914,GO:0007488,GO:0007298,GO:0005496,GO:0004884,GO:0035297,GO:0070491,GO:0045938,GO:0007286,GO:0008544,GO:0007155,GO:0045944,GO:0007422,GO:0010002,GO:0007468,GO:0016322,GO:0006911,GO:0040034,GO:0003677,GO:0048477,GO:0008230,GO:0007406,GO:0035075,GO:0045893,GO:0008232,GO:0010506,GO:…		18.23	7.13	3.49	1.26	1.37	57.95	1.16	33.07	0	27.01		6.13	0	0	0	7.09	40.27	0.45	1.71	0	0	13.49	11.15	0	0.62	0	4.07	5.64	23	25.37	1.94	25.44	18.29	2.68	11.29	30.84	5.64	1.93	10.79	13.21	17.48	3.82	0
EcR	Ecdysone receptor	FBtr0086010	FBgn0000546	5233	GO:0030425,GO:0035053,GO:0007561,GO:0007443,GO:0008258,GO:0005737,GO:0035188,GO:0048666,GO:1904799,GO:0007390,GO:0006914,GO:0007488,GO:0007298,GO:0005496,GO:0004884,GO:0035297,GO:0070491,GO:0045938,GO:0007286,GO:0008544,GO:0007155,GO:0045944,GO:0007422,GO:0010002,GO:0007468,GO:0016322,GO:0006911,GO:0040034,GO:0003677,GO:0048477,GO:0008230,GO:0007406,GO:0035075,GO:0045893,GO:0008232,GO:0010506,GO:…		5.68	20.79	15.6	1.59	0.09	0	7.09	1.93	16.42	15.1		1.56	1.45	9.56	44.15	4.56	4.18	0.13	1.89	1.13	36.6	9.36	0.87	2.9	46.4	99.25	0	8.49	14.16	6.14	3.76	2.48	0	36.08	2.1	0	0	1.07	0	0	0	1.13	0
EcR	Ecdysone receptor	FBtr0086011	FBgn0000546	4092	GO:0030425,GO:0035053,GO:0007561,GO:0007443,GO:0008258,GO:0005737,GO:0035188,GO:0048666,GO:1904799,GO:0007390,GO:0006914,GO:0007488,GO:0007298,GO:0005496,GO:0004884,GO:0035297,GO:0070491,GO:0045938,GO:0007286,GO:0008544,GO:0007155,GO:0045944,GO:0007422,GO:0010002,GO:0007468,GO:0016322,GO:0006911,GO:0040034,GO:0003677,GO:0048477,GO:0008230,GO:0007406,GO:0035075,GO:0045893,GO:0008232,GO:0010506,GO:…		0	0	0	0	0	0	0	0	0	4.28		0	0	0	0	9.8	8.82	0	3.72	0	0	0	0	0	0	0	60.74	0	9.34	5.91	0	24.48	8.07	0	0	0	0	0	1.44	0	0	0.85	0
EcR	Ecdysone receptor	FBtr0086012	FBgn0000546	4984	GO:0030425,GO:0035053,GO:0007561,GO:0007443,GO:0008258,GO:0005737,GO:0035188,GO:0048666,GO:1904799,GO:0007390,GO:0006914,GO:0007488,GO:0007298,GO:0005496,GO:0004884,GO:0035297,GO:0070491,GO:0045938,GO:0007286,GO:0008544,GO:0007155,GO:0045944,GO:0007422,GO:0010002,GO:0007468,GO:0016322,GO:0006911,GO:0040034,GO:0003677,GO:0048477,GO:0008230,GO:0007406,GO:0035075,GO:0045893,GO:0008232,GO:0010506,GO:…		10.97	8.84	7.28	32.19	51.49	0.27	27.36	49.63	20.08	46.59		6.8	35.76	14.27	36.44	9.37	14.66	20.99	3.16	22.97	21.75	28.37	13	29.45	33.07	43.99	96.15	82.88	12.99	3.27	14.03	0	13.59	21.77	18.7	13.77	63.72	0	0.79	0	0	0	7.54
EcR	Ecdysone receptor	FBtr0302439	FBgn0000546	8415	GO:0030425,GO:0035053,GO:0007561,GO:0007443,GO:0008258,GO:0005737,GO:0035188,GO:0048666,GO:1904799,GO:0007390,GO:0006914,GO:0007488,GO:0007298,GO:0005496,GO:0004884,GO:0035297,GO:0070491,GO:0045938,GO:0007286,GO:0008544,GO:0007155,GO:0045944,GO:0007422,GO:0010002,GO:0007468,GO:0016322,GO:0006911,GO:0040034,GO:0003677,GO:0048477,GO:0008230,GO:0007406,GO:0035075,GO:0045893,GO:0008232,GO:0010506,GO:…		11.83	10.82	14.79	16.45	0.16	18.29	13.5	36.84	37.35	33.96		7.97	43.3	67.78	29.68	15.31	18.71	16.64	8.96	19.84	37.81	18.37	22.67	20.11	43.2	63.73	68.85	22.05	15.08	1.87	10.1	15.5	11.37	61.62	23.43	43.77	106.84	0	0	2.63	2.17	3.32	2.82
ed	echinoid	FBtr0077465	FBgn0000547	5065	GO:0007391,GO:0030038,GO:0005913,GO:0016337,GO:0008360,GO:0007156,GO:0035157,GO:0090138,GO:0005886,GO:0050768,GO:0048644,GO:0002009,GO:0046843,GO:0005938,GO:0032956,GO:0016319,GO:0002121,GO:0005515,GO:0007173,GO:0035330,GO:0042059,GO:0046331,GO:0005912,GO:0007476,GO:0035147,GO:0042335,GO:0046621,GO:0016021,GO:0042060,GO:0035331,GO:0007423,GO:0016318		0	0	0	0	0	0	0	0	5.41	2.7		0	0	0	0	0.15	0.56	0	0	0	0	0	0	0	0	0	15.18	0	1.97	0.27	0	0	0	0	0	9.58	0	0	0	0	0.06	0	0
ed	echinoid	FBtr0334265	FBgn0000547	6378	GO:0007391,GO:0030038,GO:0005913,GO:0016337,GO:0008360,GO:0007156,GO:0035157,GO:0090138,GO:0005886,GO:0050768,GO:0048644,GO:0002009,GO:0046843,GO:0005938,GO:0032956,GO:0016319,GO:0002121,GO:0005515,GO:0007173,GO:0035330,GO:0042059,GO:0046331,GO:0005912,GO:0007476,GO:0035147,GO:0042335,GO:0046621,GO:0016021,GO:0042060,GO:0035331,GO:0007423,GO:0016318		19.39	25.1	24.47	3.21	0.09	5.86	14.27	4.37	0.58	1.05		8.66	98.88	3	4.19	0	0	20.1	21.01	39.51	82.2	67.39	65.45	28.01	1.14	0.06	1.32	5.99	0	0.18	12.89	9.67	12.3	13.23	13.56	9.8	6.51	0	0	0	0	0.16	0.08
ed	echinoid	FBtr0334266	FBgn0000547	5112	GO:0007391,GO:0030038,GO:0005913,GO:0016337,GO:0008360,GO:0007156,GO:0035157,GO:0090138,GO:0005886,GO:0050768,GO:0048644,GO:0002009,GO:0046843,GO:0005938,GO:0032956,GO:0016319,GO:0002121,GO:0005515,GO:0007173,GO:0035330,GO:0042059,GO:0046331,GO:0005912,GO:0007476,GO:0035147,GO:0042335,GO:0046621,GO:0016021,GO:0042060,GO:0035331,GO:0007423,GO:0016318		19.28	23.87	41.15	14.6	0	0	0	1.42	1.73	0		4.56	4.69	0	0.53	0	0	77.73	12.39	0.15	39.97	25.74	40.25	2.61	0.04	0	0	0.75	0	0	45.29	22.54	10.76	0	0.05	0	0	0	0	0	0	0	0
Edg78E	Ecdysone-dependent gene 78E	FBtr0078408	FBgn0000551	967	GO:0042302,GO:0008011,GO:0031012,GO:0008010,GO:0040003		0.24	0	0	0	0	0	0	0	0	0.14		0	0	0	0	0	0	0	0.3	0	0	0.15	0	0	0	0	9.65	0	0	0	0	0	0	0	0	0	0	0	0	0	0	0	0
Edg78E	Ecdysone-dependent gene 78E	FBtr0344634	FBgn0000551	546	GO:0042302,GO:0008011,GO:0031012,GO:0008010,GO:0040003		0	0	0	0	0	0	0	0	0	0		0	0	0	0	0	0	0	0	0	0	0	0	0	0	0	0	0	0	0	0	0	0	0	0	0	0	0	0	0	0	0	0
Edg84A	Ecdysone-dependent gene 84A	FBtr0081688	FBgn0000552	652	GO:0042302,GO:0008011,GO:0031012,GO:0008010,GO:0040003		0	0	0	0	0	0	0	0	0	0		0	0	0	0	0	0	0	0	0	0	0	0	0	0	0	0	0	0	0	0	0	0	0	0	0	0	0	0	0	0	0	0
eEF1alpha2	eukaryotic translation elongation factor 1 alpha 2	FBtr0085832	FBgn0000557	2606	GO:0005737,GO:0003924,GO:0003746,GO:0005525,GO:0006414,GO:0005853		33.11	24	22.2	0	0	0	9.6	15.56	73.44	105.67		27.82	0	0	0	74.17	16.37	0	0	0	0	24.04	0.76	0	0.97	0	1.75	29.97	0	0	0	0	46.46	14.97	0	0.1	0	0	25.05	126.05	233.22	15.25	0
eEF1alpha2	eukaryotic translation elongation factor 1 alpha 2	FBtr0085833	FBgn0000557	2594	GO:0005737,GO:0003924,GO:0003746,GO:0005525,GO:0006414,GO:0005853		267.09	361.29	504.27	86.95	0.08	526.22	95.84	204.59	339.85	452.23		125.95	0.11	0.04	0.02	270.63	92.68	0.1	0.1	40.75	0.11	718.1	23.1	0	52.15	0.14	62.41	0.09	32.96	0.08	240.2	414.03	233.51	203.57	0.01	91.8	0.06	0.06	71.28	142.53	0.06	0.03	0.1
eEF1alpha2	eukaryotic translation elongation factor 1 alpha 2	FBtr0085834	FBgn0000557	2591	GO:0005737,GO:0003924,GO:0003746,GO:0005525,GO:0006414,GO:0005853		616.94	730.05	552.96	413.85	271.95	23.31	431.32	778.5	64.35	254.37		83.6	933.46	796.31	259.18	195.86	331.69	403.26	407.88	438.52	918.68	318.99	520.96	331.64	730.97	952.67	1095.97	287.82	482.65	596.41	228.36	129.24	36.66	452.79	226.52	125.27	1068.33	127.04	1.33	0.2	28.32	221.11	524.98
eEF1alpha2	eukaryotic translation elongation factor 1 alpha 2	FBtr0085835	FBgn0000557	2603	GO:0005737,GO:0003924,GO:0003746,GO:0005525,GO:0006414,GO:0005853		86.84	76.24	70.76	0	0	0	42.82	109.78	53.82	56.38		29.99	0	0	0	19.13	0	0	0	0	0	3.82	250.71	0	93.36	0	30.28	4.93	29.52	0	60.72	0	0.05	0	0	159.64	0	68.25	159.57	0.22	69.96	37.13	0
eEF2	eukaryotic translation elongation factor 2	FBtr0085911	FBgn0000559	2771	GO:0003924,GO:0006414,GO:0005829,GO:0003746,GO:0005525		140.25	155.16	137.54	0	0	49.19	65.49	169.4	199.35	123.73		45.03	0	65.79	28.57	106.08	0	0	0	0	3.12	0	3.45	0	19.5	0.01	0	0	78.27	53.75	0	40.83	75.28	0	105.09	0	0	19.26	0	43.92	142.69	75.45	0
eEF2	eukaryotic translation elongation factor 2	FBtr0085912	FBgn0000559	2819	GO:0003924,GO:0006414,GO:0005829,GO:0003746,GO:0005525		17.99	12.71	11.62	26.69	0	0	8.71	12.66	11.93	4.76		15.55	0	0	0	7.77	6.52	0	0	0	0	0	0	0.74	21.87	0	0	0.41	17.19	29.2	75.43	8.21	1.19	0	0	17.67	0	22.43	39.11	0	50.7	0	0
eEF2	eukaryotic translation elongation factor 2	FBtr0332966	FBgn0000559	3008	GO:0003924,GO:0006414,GO:0005829,GO:0003746,GO:0005525		33.21	15.88	26.83	92.38	121.1	12	142.25	28.25	2.82	40.5		53.32	7.71	35.72	1.77	32.02	149.76	30.55	48.81	18.92	1.66	70.29	13.18	26.56	6.05	0.99	0.74	115.04	22.39	1.48	54.71	17.39	26.8	82.85	51.51	57.27	122.14	42.03	30.16	43.84	19.28	49.1	365.12
eg	eagle	FBtr0078437	FBgn0000560	1503	GO:0043565,GO:0007417,GO:0003700,GO:0006355,GO:0008270,GO:0005634		0	0	0	0	0	0	0	0	0	0		0	0	0	0	0	0	0	0	0	0	0	0	0	0	0	0	0	0	0	0	0	0	0	0	0	0	0	0	0	0	0	0
eg	eagle	FBtr0078438	FBgn0000560	1800	GO:0043565,GO:0007417,GO:0003700,GO:0006355,GO:0008270,GO:0005634		0	0	0	0	0	0	0	0	0	0		0	0	0	0	0	0	0	0	0	0	0	0.54	0	0	0	0	0	0	0	0	0	0	0	0	0	0	0	0	0	0	0	0
eg	eagle	FBtr0332810	FBgn0000560	1454	GO:0043565,GO:0007417,GO:0003700,GO:0006355,GO:0008270,GO:0005634		0	0	0	0	0	0	0.57	0	0	0		0	0	0	0	0	0	0	0	0	0	0	0	0	0	0	0	0	0	0	0	0	0	0	0	0	0	0	0	0	0	0	0
egl	egalitarian	FBtr0114586	FBgn0000562	4428	GO:0016325,GO:0045451,GO:0003729,GO:0060810,GO:0048477,GO:0008408,GO:0007436,GO:0008298,GO:0007312,GO:0051028,GO:0006139,GO:0046011,GO:0007294,GO:0045450		14.55	18.94	17.25	1.71	34.89	7.68	7.27	28.77	8.26	25.3		6.8	0.71	0	0	5.2	0.43	3.13	2.6	6.12	4.3	7.55	38.54	6.76	29.81	8.72	49.28	41.39	11.8	2.4	20.13	1.44	6.94	24.87	0	31.22	18.65	0	0	0.34	0	0	5.76
egl	egalitarian	FBtr0343272	FBgn0000562	3885	GO:0016325,GO:0045451,GO:0003729,GO:0060810,GO:0048477,GO:0008408,GO:0007436,GO:0008298,GO:0007312,GO:0051028,GO:0006139,GO:0046011,GO:0007294,GO:0045450		0	0	0	21.88	0	0	0	0	3.26	0		0	3.15	0.71	0.73	0	0	0	4.26	0	0	0	0	0	1.85	0	0	0	15.47	0	15.83	2.26	0	0.58	4.36	0	0	0.96	0.83	0	1.31	0.09	0
Eh	Eclosion hormone	FBtr0083444	FBgn0000564	704	GO:0007563,GO:0008031,GO:0007562,GO:0005615,GO:0005184,GO:0007218,GO:0008255,GO:0018990		0	0	0	0	0	0	0	0	0	0		0.44	0	0	0	0	0	0	0	0	0	0	0	0	0	0	0	0	0	0	0	0	0	0	0	0	0	0	0	0	0	0	105.39
Eh	Eclosion hormone	FBtr0334930	FBgn0000564	700	GO:0007563,GO:0008031,GO:0007562,GO:0005615,GO:0005184,GO:0007218,GO:0008255,GO:0018990		0	0	0	0	0	0	0	0	0	0		0	0	0	0	0	0	0	0	0	0	0	0	23.02	0	0	0	0	0	0	0	0	0	0	0	0.19	0	0	0	0	0	0	1780.23
Eip71CD	Ecdysone-induced protein 28/29kD	FBtr0075552	FBgn0000565	1090	GO:0000096,GO:0006979,GO:0034599,GO:0055114,GO:0048812,GO:0008113,GO:0048102,GO:0035071,GO:0008340		0.37	0.33	0.61	0	0	0.78	0	0	0	0		1.93	0	2.84	0	0	0.42	0	0.14	0	0	0	1.52	0.29	0.59	0	0	7.43	0	0	0	0	0	0.15	0	0	0	0	0	1.43	1.89	0.82	0
Eip71CD	Ecdysone-induced protein 28/29kD	FBtr0075553	FBgn0000565	980	GO:0000096,GO:0006979,GO:0034599,GO:0055114,GO:0048812,GO:0008113,GO:0048102,GO:0035071,GO:0008340		0	0	0	0	0	0	0	0	0	0		9.75	0	0	0	6.44	0	0	0	0	0	0.18	0.46	6.29	6.05	0	0	0.3	0	0	0	0	0	0	0	4.8	0	0	0	0	0	0	0
Eip71CD	Ecdysone-induced protein 28/29kD	FBtr0075554	FBgn0000565	968	GO:0000096,GO:0006979,GO:0034599,GO:0055114,GO:0048812,GO:0008113,GO:0048102,GO:0035071,GO:0008340		0	0	0	0	0	0	0	0	0	0		0	0	0	0	0	0	0	0	0	0	0	40.7	0	0	0	0	0	0	0	0	0	0	0	0	0	0	0	0	0	0	0	0
Eip71CD	Ecdysone-induced protein 28/29kD	FBtr0303531	FBgn0000565	932	GO:0000096,GO:0006979,GO:0034599,GO:0055114,GO:0048812,GO:0008113,GO:0048102,GO:0035071,GO:0008340		17.73	9.34	14.49	0.95	28.04	12.63	0	6.16	28.83	2.22		33.44	1.31	129.38	1.34	5.51	35.07	0	0	0.93	0	0	0	0	0	0.33	0	83.09	0.91	0	32.97	12.41	24.5	0	0	15.83	0	37.78	26.86	53.35	71.26	82.07	27.35
Eip71CD	Ecdysone-induced protein 28/29kD	FBtr0330176	FBgn0000565	1056	GO:0000096,GO:0006979,GO:0034599,GO:0055114,GO:0048812,GO:0008113,GO:0048102,GO:0035071,GO:0008340		0	0	0	0	0	0.63	0	0	1.52	0		0	0	0	0	0	0	0	11.24	0	0	18.09	0	0	0	0	0	29.42	0	0	0	0	0	11.04	0	8.47	0	0	0	0	4.59	0	0
Eip71CD	Ecdysone-induced protein 28/29kD	FBtr0330177	FBgn0000565	980	GO:0000096,GO:0006979,GO:0034599,GO:0055114,GO:0048812,GO:0008113,GO:0048102,GO:0035071,GO:0008340		0	0	0	0	0	0	0	0	0	0		9.75	0	0	0	6.44	0	0	0	0	0	0.18	0.46	6.29	6.05	0	0	0.3	0	0	0	0	0	0	0	4.8	0	0	0	0	0	0	0
Eip55E	Eip55E	FBtr0086710	FBgn0000566	1362	GO:0005737,GO:0019343,GO:0030170,GO:0071266,GO:0000096,GO:0003962,GO:0019346,GO:0004123,GO:0006750		5.28	5.67	0	0	0	0	0.52	0.91	0.4	3.52		0	0	0	0	0	0	0	0.41	0	0	2.96	0	0	4.65	0	0	2.42	0	0	3.69	0.08	0	0	0	0	0	0	12.86	15.39	1.31	12.33	0
Eip55E	Eip55E	FBtr0345422	FBgn0000566	1478	GO:0005737,GO:0019343,GO:0030170,GO:0071266,GO:0000096,GO:0003962,GO:0019346,GO:0004123,GO:0006750		0	0	0	0	0	0	0	0	0	0		2.98	0	0	0	0	0.87	0	0	0	0	7.02	0	3.85	0	0	2.18	0	21.11	0	8.1	0	0	0	0	0	0	4.77	5.19	2.34	2.67	0	0.12
Eip74EF	Ecdysone-induced protein 74EF	FBtr0075202	FBgn0000567	6012	GO:0006914,GO:0045944,GO:0040034,GO:0048477,GO:0043565,GO:0001077,GO:0003700,GO:0005634,GO:0008219,GO:0035071		0.1	0.06	0.15	0	0.24	0.1	0.8	0.67	0.44	0.72		1.86	0	0.1	8.32	0.02	0.02	0	0.12	8.22	0.02	2.71	0.42	5.77	11.14	1.92	0.87	1.33	0.21	0	0	0	0.67	5.14	1.56	1.01	0.15	0	0	0	0	0	0.06
Eip74EF	Ecdysone-induced protein 74EF	FBtr0075203	FBgn0000567	6012	GO:0006914,GO:0045944,GO:0040034,GO:0048477,GO:0043565,GO:0001077,GO:0003700,GO:0005634,GO:0008219,GO:0035071		0.1	0.06	0.15	0	0.24	0.1	0.8	0.67	0.44	0.72		1.86	0	0.1	8.32	0.02	0.02	0	0.12	8.22	0.02	2.71	0.42	5.77	11.14	1.92	0.87	1.33	0.21	0	0	0	0.67	5.14	1.56	1.01	0.15	0	0	0	0	0	0.06
Eip74EF	Ecdysone-induced protein 74EF	FBtr0075204	FBgn0000567	5059	GO:0006914,GO:0045944,GO:0040034,GO:0048477,GO:0043565,GO:0001077,GO:0003700,GO:0005634,GO:0008219,GO:0035071		20.85	20.6	20.79	28.07	17.01	26.74	2.84	33.14	14.92	10.63		11.1	8.1	34.5	206.76	10.72	9	26.5	11.17	9.55	52.33	58.68	59.96	27.29	68.81	174.31	72.12	51.99	44.71	8.72	54.58	16.92	17.47	40.04	21.3	24.89	94.28	0.06	2.12	1.94	0.58	0.63	36.26
Eip74EF	Ecdysone-induced protein 74EF	FBtr0100411	FBgn0000567	6239	GO:0006914,GO:0045944,GO:0040034,GO:0048477,GO:0043565,GO:0001077,GO:0003700,GO:0005634,GO:0008219,GO:0035071		1.75	3.13	3.19	2.74	0.13	2.01	5.48	4.47	2.64	2.6		1.63	3.2	12.2	4.78	0.47	2.81	1.53	3.56	0.1	0	9.43	12.87	4.13	21.81	15.16	2.11	12.31	4.99	13.52	2.14	1.33	3.66	51.8	11.32	18.89	1.86	0	0.22	0	0	0	0.41
Eip74EF	Ecdysone-induced protein 74EF	FBtr0305796	FBgn0000567	6012	GO:0006914,GO:0045944,GO:0040034,GO:0048477,GO:0043565,GO:0001077,GO:0003700,GO:0005634,GO:0008219,GO:0035071		0.1	0.06	0.15	0	0.24	0.1	0.8	0.67	0.44	0.72		1.86	0	0.1	8.32	0.02	0.02	0	0.12	8.22	0.02	2.71	0.42	5.77	11.14	1.92	0.87	1.33	0.21	0	0	0	0.67	5.14	1.56	1.01	0.15	0	0	0	0	0	0.06
Eip75B	Ecdysone-induced protein 75B	FBtr0075148	FBgn0000568	4536	GO:0003707,GO:0003677,GO:0010468,GO:0048477,GO:0019730,GO:0035075,GO:0000122,GO:0043565,GO:0010906,GO:0020037,GO:0007553,GO:0004887,GO:0007591,GO:0008270,GO:0018990,GO:0005634,GO:0004879,GO:0043401		0	0	0	0	0	0	0	0	0	0		0	0	0	0	0	0	0	0	0	0	0	0	0	0	0	0	0	0	0	0	0	0	0	0	0	0	0	0	0	0	0	0
Eip75B	Ecdysone-induced protein 75B	FBtr0075149	FBgn0000568	5769	GO:0003707,GO:0003677,GO:0010468,GO:0048477,GO:0019730,GO:0035075,GO:0000122,GO:0043565,GO:0010906,GO:0020037,GO:0007553,GO:0004887,GO:0007591,GO:0008270,GO:0018990,GO:0005634,GO:0004879,GO:0043401		11.48	15.88	28.01	2.44	0	3.72	0.38	17.06	0.73	20.76		6.13	51.54	69.14	944.15	50.18	18.44	74.35	136.03	0.82	1.24	5.4	0.9	188.34	11.3	263.36	130.87	33.21	10.95	3.22	0.16	5.64	6.43	3.92	149.57	10.6	83.21	0	1.01	0	2.77	0	87.28
Eip75B	Ecdysone-induced protein 75B	FBtr0075150	FBgn0000568	6077	GO:0003707,GO:0003677,GO:0010468,GO:0048477,GO:0019730,GO:0035075,GO:0000122,GO:0043565,GO:0010906,GO:0020037,GO:0007553,GO:0004887,GO:0007591,GO:0008270,GO:0018990,GO:0005634,GO:0004879,GO:0043401		11.86	6.47	6.55	0.06	38.25	4.24	0	11.96	1.13	33.32		4.56	0	0	0	0.88	11.38	0	0.91	101.21	0.62	3.09	27.06	21.68	14.23	57.65	62.71	12.6	0	19.98	28.14	6.08	2.19	8.52	36.36	38.61	27.15	1.31	0	0	0	0	4.31
Eip75B	Ecdysone-induced protein 75B	FBtr0075151	FBgn0000568	3750	GO:0003707,GO:0003677,GO:0010468,GO:0048477,GO:0019730,GO:0035075,GO:0000122,GO:0043565,GO:0010906,GO:0020037,GO:0007553,GO:0004887,GO:0007591,GO:0008270,GO:0018990,GO:0005634,GO:0004879,GO:0043401		94.72	117.5	123.45	252.07	11.74	102.7	159.03	235.42	218.43	175.01		92.33	212.88	222.02	261.56	102.71	139.1	26.55	51.27	15.18	189.21	149.25	277.64	203.66	283.09	521.23	453.52	143.45	45.91	38.18	52.52	47.45	40.64	224.81	90.72	204.09	518.99	10.65	4.22	2.99	3.6	5.92	84.05
Eip75B	Ecdysone-induced protein 75B	FBtr0306813	FBgn0000568	5849	GO:0003707,GO:0003677,GO:0010468,GO:0048477,GO:0019730,GO:0035075,GO:0000122,GO:0043565,GO:0010906,GO:0020037,GO:0007553,GO:0004887,GO:0007591,GO:0008270,GO:0018990,GO:0005634,GO:0004879,GO:0043401		21.36	24.64	31.12	32.9	60.62	45.53	35.47	26.94	27.46	46.6		12.7	19.12	291.72	146.81	94.27	82.94	36.12	22.63	38.73	65.98	30.8	115.92	86.49	164.62	190.59	112.37	57.83	32.42	28.9	55.4	28.12	45.61	62.61	206.65	78.36	200.95	1.28	2.36	4.26	3.88	3.57	47.41
Eip75B	Ecdysone-induced protein 75B	FBtr0306814	FBgn0000568	8236	GO:0003707,GO:0003677,GO:0010468,GO:0048477,GO:0019730,GO:0035075,GO:0000122,GO:0043565,GO:0010906,GO:0020037,GO:0007553,GO:0004887,GO:0007591,GO:0008270,GO:0018990,GO:0005634,GO:0004879,GO:0043401		63.05	83.53	71.1	47.7	16.53	74.75	77.86	116.01	95.97	92.64		37.7	129.49	412.67	347.53	94.93	116.41	55.36	35.27	82.06	51.19	247.89	418.06	207.88	436.04	609.97	82.41	131.42	30.03	51.1	50.81	42.89	56.15	327.38	113.39	318.53	558.08	2.91	2.96	4.13	2.23	1.33	22.3
Eip75B	Ecdysone-induced protein 75B	FBtr0347013	FBgn0000568	3876	GO:0003707,GO:0003677,GO:0010468,GO:0048477,GO:0019730,GO:0035075,GO:0000122,GO:0043565,GO:0010906,GO:0020037,GO:0007553,GO:0004887,GO:0007591,GO:0008270,GO:0018990,GO:0005634,GO:0004879,GO:0043401		0.38	0.71	0.78	1.01	0.45	0	0	2.27	0.58	0.17		0.17	0.06	14.23	13.56	3.89	2.58	0	0.22	0	0.54	0.44	1.07	0.54	3.72	0.37	0.41	6.89	0.78	0.22	0	4.07	0	3.04	0.09	8.68	30.57	0	0	0	0	0	0.18
emc	extra macrochaetae	FBtr0072578	FBgn0000575	2049	GO:0007541,GO:0008407,GO:0007391,GO:0045466,GO:0005737,GO:0008258,GO:0005654,GO:0007286,GO:0007530,GO:0043392,GO:0007422,GO:0007460,GO:0000122,GO:0008586,GO:0030381,GO:0048056,GO:0042675,GO:0046843,GO:0007494,GO:0002121,GO:0045892,GO:0046331,GO:0007476,GO:0046982,GO:0007458,GO:0008283,GO:0046552,GO:0005634,GO:0001191		332.89	421.43	294.71	186.3	161.89	262.54	251.54	226.46	127.36	254.53		154.56	361.42	0.28	161.05	8.16	0.06	199.09	67.06	590.62	608.97	523.64	475.86	395.18	31.57	47.59	19.18	50.17	1.06	0	0.22	1.72	54.92	72.89	11.18	30.57	69.94	6.69	35.08	26.35	22.14	8.75	106.15
ems	empty spiracles	FBtr0082863	FBgn0000576	2478	GO:0007420,GO:0035284,GO:0010468,GO:0035288,GO:0048813,GO:0014019,GO:0001158,GO:0007389,GO:0035277,GO:0007409,GO:0000980,GO:0006355,GO:0001700,GO:0005634,GO:0007424,GO:0007419		0	0	0	0	0	0	0	0	0	0		0.07	0	0	0	0	0	0	0	0	0	1.03	0	0	0	0	0	0	0	0	0	0	0	0.26	0	0.04	0	0	0	0	0	0	0
en	engrailed	FBtr0088095	FBgn0000577	2792	GO:0007474,GO:0007400,GO:0007448,GO:0007447,GO:0045944,GO:0007486,GO:0010468,GO:0035288,GO:0048100,GO:0000122,GO:0043565,GO:0007487,GO:0001078,GO:0048099,GO:0007485,GO:0007386,GO:0001158,GO:0008406,GO:0035224,GO:0007388,GO:0007367,GO:0007411,GO:0045892,GO:0035277,GO:0000980,GO:0035289,GO:0010629,GO:0007418,GO:0005634,GO:0035215,GO:0035290,GO:0021960		0	0	0	0	0	0	0	0	0	0		0	0	0	0	0	0	0	0	0	0	0	0	0	0	0	0	0	0	0	0	0	0	0	0	0	0	0	0	0	0	0	0
en	engrailed	FBtr0088096	FBgn0000577	2465	GO:0007474,GO:0007400,GO:0007448,GO:0007447,GO:0045944,GO:0007486,GO:0010468,GO:0035288,GO:0048100,GO:0000122,GO:0043565,GO:0007487,GO:0001078,GO:0048099,GO:0007485,GO:0007386,GO:0001158,GO:0008406,GO:0035224,GO:0007388,GO:0007367,GO:0007411,GO:0045892,GO:0035277,GO:0000980,GO:0035289,GO:0010629,GO:0007418,GO:0005634,GO:0035215,GO:0035290,GO:0021960		0	0	4.11	0	0	0	0.05	0	0	0		0.05	0.83	0	0	0	0	0	0	0	0	0	0	0	0	0.05	0	0	0	0	0	0	0	0	0	0	0	0	0	0	0	0	0
ena	enabled	FBtr0086582	FBgn0000578	3806	GO:0030425,GO:0046847,GO:0030335,GO:0007391,GO:0008258,GO:0007390,GO:0007298,GO:0071212,GO:0030036,GO:0030027,GO:0031252,GO:0031346,GO:0032433,GO:0010591,GO:0017124,GO:0030424,GO:0048749,GO:0048813,GO:0003779,GO:1990255,GO:0007396,GO:0032956,GO:0007015,GO:0007303,GO:0005515,GO:0005911,GO:0007411,GO:0051489,GO:0005912,GO:0007409,GO:0007010,GO:0008064,GO:0045886,GO:0051491,GO:0003382,GO:0035262,GO:…		15.5	18.46	12.71	2.5	1.86	8.26	9.85	10.71	2.46	12.2		7.34	13.06	2.44	0.48	36.54	7.81	0.6	6.12	22.58	47.51	60.84	11.41	18.03	33.74	36.94	18.04	52.78	14.64	34.58	35.64	65.56	34.93	21.75	2.5	28.71	83.35	0	3.24	0	0	0	2.86
ena	enabled	FBtr0086583	FBgn0000578	3370	GO:0030425,GO:0046847,GO:0030335,GO:0007391,GO:0008258,GO:0007390,GO:0007298,GO:0071212,GO:0030036,GO:0030027,GO:0031252,GO:0031346,GO:0032433,GO:0010591,GO:0017124,GO:0030424,GO:0048749,GO:0048813,GO:0003779,GO:1990255,GO:0007396,GO:0032956,GO:0007015,GO:0007303,GO:0005515,GO:0005911,GO:0007411,GO:0051489,GO:0005912,GO:0007409,GO:0007010,GO:0008064,GO:0045886,GO:0051491,GO:0003382,GO:0035262,GO:…		0	0	0	0	0	0	0	0	0	0		0	0	0	0	0	0	20.55	0	0	0	0	0	0	0	0	0	0	0	0	0	0	0	0	0	0	0	2.29	2.95	0	2.18	0.25	0.91
ena	enabled	FBtr0086584	FBgn0000578	3669	GO:0030425,GO:0046847,GO:0030335,GO:0007391,GO:0008258,GO:0007390,GO:0007298,GO:0071212,GO:0030036,GO:0030027,GO:0031252,GO:0031346,GO:0032433,GO:0010591,GO:0017124,GO:0030424,GO:0048749,GO:0048813,GO:0003779,GO:1990255,GO:0007396,GO:0032956,GO:0007015,GO:0007303,GO:0005515,GO:0005911,GO:0007411,GO:0051489,GO:0005912,GO:0007409,GO:0007010,GO:0008064,GO:0045886,GO:0051491,GO:0003382,GO:0035262,GO:…		3.23	2.35	2.11	0.78	0	0	0	0.38	0.06	1.74		1.18	0	0	0	3	0	0	0.86	0.27	0	4.46	0	2.89	0.57	0.16	0	0.07	0	0.17	1.08	7.44	4.83	2.37	17.63	0.76	0.37	0.23	2.2	0	0	0	0
ena	enabled	FBtr0100174	FBgn0000578	2878	GO:0030425,GO:0046847,GO:0030335,GO:0007391,GO:0008258,GO:0007390,GO:0007298,GO:0071212,GO:0030036,GO:0030027,GO:0031252,GO:0031346,GO:0032433,GO:0010591,GO:0017124,GO:0030424,GO:0048749,GO:0048813,GO:0003779,GO:1990255,GO:0007396,GO:0032956,GO:0007015,GO:0007303,GO:0005515,GO:0005911,GO:0007411,GO:0051489,GO:0005912,GO:0007409,GO:0007010,GO:0008064,GO:0045886,GO:0051491,GO:0003382,GO:0035262,GO:…		0	0	0	17.19	0	0	0	0	0	0		0	0	0	0	0	6.89	0	0	0	0	0	0	0	0.08	0	0	0	0	0	0	0	0	0	17.92	0.05	3.94	0	0	0	5.38	0	25.28
ena	enabled	FBtr0100176	FBgn0000578	3446	GO:0030425,GO:0046847,GO:0030335,GO:0007391,GO:0008258,GO:0007390,GO:0007298,GO:0071212,GO:0030036,GO:0030027,GO:0031252,GO:0031346,GO:0032433,GO:0010591,GO:0017124,GO:0030424,GO:0048749,GO:0048813,GO:0003779,GO:1990255,GO:0007396,GO:0032956,GO:0007015,GO:0007303,GO:0005515,GO:0005911,GO:0007411,GO:0051489,GO:0005912,GO:0007409,GO:0007010,GO:0008064,GO:0045886,GO:0051491,GO:0003382,GO:0035262,GO:…		0	0	0	0	0	0	0	0	0	0		0	0	0	0	0	0	0	0	0	0	0	0	0	0	0	0	0	0	0	0	0	0	0	0	0	0	0	1.03	1.48	0	4.42	0
ena	enabled	FBtr0114623	FBgn0000578	4107	GO:0030425,GO:0046847,GO:0030335,GO:0007391,GO:0008258,GO:0007390,GO:0007298,GO:0071212,GO:0030036,GO:0030027,GO:0031252,GO:0031346,GO:0032433,GO:0010591,GO:0017124,GO:0030424,GO:0048749,GO:0048813,GO:0003779,GO:1990255,GO:0007396,GO:0032956,GO:0007015,GO:0007303,GO:0005515,GO:0005911,GO:0007411,GO:0051489,GO:0005912,GO:0007409,GO:0007010,GO:0008064,GO:0045886,GO:0051491,GO:0003382,GO:0035262,GO:…		3.67	1.07	1.71	0.09	0	2.01	1.38	5.42	0	2.09		0.8	4.63	38.76	29.14	1.33	0.17	0	0.92	1.25	0.15	2.79	1.72	1.46	0.34	0	0	1.95	0.77	1.38	5.09	0.36	1.65	0	14.79	5.58	27.86	0	0	0	0	0	0.11
ena	enabled	FBtr0340450	FBgn0000578	4417	GO:0030425,GO:0046847,GO:0030335,GO:0007391,GO:0008258,GO:0007390,GO:0007298,GO:0071212,GO:0030036,GO:0030027,GO:0031252,GO:0031346,GO:0032433,GO:0010591,GO:0017124,GO:0030424,GO:0048749,GO:0048813,GO:0003779,GO:1990255,GO:0007396,GO:0032956,GO:0007015,GO:0007303,GO:0005515,GO:0005911,GO:0007411,GO:0051489,GO:0005912,GO:0007409,GO:0007010,GO:0008064,GO:0045886,GO:0051491,GO:0003382,GO:0035262,GO:…		1.58	6.31	13.08	1.34	0	1.61	0.11	3.58	1.89	5.76		2.86	3.25	191.18	0	3.09	10.82	3.61	14.72	14.89	1.84	22.17	4.65	10.75	8.97	1	0	23.51	5.45	1.48	8.11	3.98	15.18	28.22	1.42	31.65	1.98	4.35	0.87	5.64	2.08	1.93	3.89
Eno	Enolase	FBtr0077905	FBgn0000579	2183	GO:0006096,GO:0005737,GO:0000287,GO:0005886,GO:0000015,GO:0010906,GO:0004634		0	0	0	0	0	0	0	0	0	0		0	0	0	0	0	0	0	0	0	0	0	0	0	0	0	0	0	0	0	0	0	0	0	0	0	0	0	0	0	0	0	0
Eno	Enolase	FBtr0077906	FBgn0000579	2664	GO:0006096,GO:0005737,GO:0000287,GO:0005886,GO:0000015,GO:0010906,GO:0004634		8.28	16.7	6.24	13.46	5.44	25.81	26.8	7.18	2.61	5.27		12.48	12.63	22.54	0.92	2.18	17.04	54.01	15.08	75.73	24.22	24.76	34.9	15.2	13.96	18.26	3.53	7.45	16.35	5.39	10.09	23.66	6.41	24.45	12.48	6.66	0	151.23	193.8	223.7	195.59	293.98	201.03
Eno	Enolase	FBtr0077907	FBgn0000579	2257	GO:0006096,GO:0005737,GO:0000287,GO:0005886,GO:0000015,GO:0010906,GO:0004634		0	0	0.24	0	0	0	0	0.87	0	0		0.15	0	0	0	0	0	0	0	0	0	0	0	0	0	0	0	0	1.44	0	0	0	0	1.5	0	0	0	0.53	2.68	0	1.78	4.6	0
Eno	Enolase	FBtr0077908	FBgn0000579	2198	GO:0006096,GO:0005737,GO:0000287,GO:0005886,GO:0000015,GO:0010906,GO:0004634		0	0	0	0	0	0	0	0	0	0.26		0	0	0	0	0	0	0	0	0	0	0	0	0	11.6	0	0	0	0	0	0	0	0	0	0	0	0	0	0	0	3.61	0	0
Eno	Enolase	FBtr0077909	FBgn0000579	1754	GO:0006096,GO:0005737,GO:0000287,GO:0005886,GO:0000015,GO:0010906,GO:0004634		55.05	68.78	39.97	174.55	36.75	102.53	39.63	66	37.08	79.75		116.12	56	25.2	10.85	47.42	134.14	0	0.79	160.6	25.66	32.77	80.17	49.64	18.08	53.62	0	33.76	56.27	27.04	37.19	52.08	98.2	71.77	4.45	44.64	14.48	172.98	274.79	262.28	800.91	172.08	0
Eno	Enolase	FBtr0302115	FBgn0000579	2561	GO:0006096,GO:0005737,GO:0000287,GO:0005886,GO:0000015,GO:0010906,GO:0004634		12.68	10.71	12.79	0.94	0.92	7.67	15.46	27.87	5.8	12.88		1.26	0	0.29	0	15.73	0	0	5.35	0.09	0	8.21	0.79	0	2.44	0	0	9.23	11.5	0	32.5	2.43	0.09	0.17	16.24	2.36	0	0	0	0	0	0	0
E(Pc)	Enhancer of Polycomb	FBtr0088139	FBgn0000581	9408	GO:0070983,GO:0035267,GO:0032777,GO:0005701,GO:0043486,GO:0005700,GO:0004402,GO:0005725,GO:0000123,GO:0016573,GO:0006325,GO:0006357,GO:0005634		9.1	30.38	34.15	10.24	0	1.82	35.68	56.9	0	11.58		0.9	13.76	17.11	0	6.27	12.74	0.65	0	0.55	0	0.56	0	0.38	0	0	0	0	0.68	0.01	2.59	2.91	3.59	4.76	12.24	0.03	32.53	0	0	0	0.38	0	0
E(Pc)	Enhancer of Polycomb	FBtr0088140	FBgn0000581	9325	GO:0070983,GO:0035267,GO:0032777,GO:0005701,GO:0043486,GO:0005700,GO:0004402,GO:0005725,GO:0000123,GO:0016573,GO:0006325,GO:0006357,GO:0005634		70.29	62.09	43.93	18.41	228.93	91.34	29.09	44.8	29.45	51.51		16.22	33.95	21.5	39.64	80.84	44.55	2.21	42.43	0	0.16	33.75	29.31	36.76	56.88	48.87	94.31	36.82	48.45	46.88	64.86	68.85	28.65	19.37	45.21	24.98	118.47	0.04	0	0	0	0	2.22
E(Pc)	Enhancer of Polycomb	FBtr0330621	FBgn0000581	10423	GO:0070983,GO:0035267,GO:0032777,GO:0005701,GO:0043486,GO:0005700,GO:0004402,GO:0005725,GO:0000123,GO:0016573,GO:0006325,GO:0006357,GO:0005634		13.57	12.39	19.59	2.65	3.93	20.87	13.47	7.83	11.31	15.74		2.97	12.45	47.86	43.41	12.31	8.47	17.85	4.5	13.45	29.15	16.53	16.58	3.79	56.15	7.87	6.49	9.26	8.28	29.83	1.97	0.82	0.57	53.74	0	27.07	8.34	0	0.33	0.14	1.1	0.3	9.38
E(Pc)	Enhancer of Polycomb	FBtr0330622	FBgn0000581	9554	GO:0070983,GO:0035267,GO:0032777,GO:0005701,GO:0043486,GO:0005700,GO:0004402,GO:0005725,GO:0000123,GO:0016573,GO:0006325,GO:0006357,GO:0005634		3.95	6.04	5.36	0	0	0.4	18.65	8.46	3.98	1.57		1.6	8.78	49.44	0	0	3.19	0	0	0	0	5.52	12.07	9.88	10.85	0	0	7.47	0	6.8	0	0	2.43	6.58	0	0	0	0	0	0	0	0	0
E(Pc)	Enhancer of Polycomb	FBtr0330623	FBgn0000581	10794	GO:0070983,GO:0035267,GO:0032777,GO:0005701,GO:0043486,GO:0005700,GO:0004402,GO:0005725,GO:0000123,GO:0016573,GO:0006325,GO:0006357,GO:0005634		0	0.95	0	15.69	31.53	0.72	0	0	0	0		0	0	0	11.41	4.72	0	0	0	0	39.9	0	0	0	0	7.18	0	0	3.61	0	4.67	8.71	4.27	0	12.02	8.13	2.19	0.56	0	0	0.46	0	0.36
esc	extra sexcombs	FBtr0080325	FBgn0000588	1704	GO:0048666,GO:0048096,GO:0042054,GO:0000790,GO:0046976,GO:0035097,GO:0007517,GO:0048813,GO:0031491,GO:0016571,GO:0031062,GO:0005700,GO:0005515,GO:0070734,GO:0006342,GO:0008047,GO:0005634,GO:0016458,GO:0035098,GO:0046974		123.76	101.37	116.06	78.74	104.69	61.62	41.94	131.38	107.39	18.83		2.56	23.14	161.74	255.26	254.08	336.83	23.19	4.66	4.39	0	35.6	0.74	24.62	13.85	34.17	4.59	18.67	141.11	44.66	101.18	26.13	53.95	21.05	85.15	57.72	4.13	0	0	0	0	0	0.05
E(spl)m8-HLH	Enhancer of split m8, helix-loop-helix	FBtr0084961	FBgn0000591	769	GO:0048666,GO:0007219,GO:0007422,GO:0043565,GO:0007498,GO:0048749,GO:0042803,GO:0048813,GO:0001078,GO:0016360,GO:0007173,GO:0003700,GO:0007398,GO:0006355,GO:0045468,GO:0046982,GO:0010629,GO:0008587		0	0	0	0	0	0	0	0	0	0		0	0	0	0	0	0	0	0	0	0	0	0	0	0	0	0	0	0	0	0	0	0	0	0	0	0	0	0	0	0	0	0
Est-6	Esterase 6	FBtr0076003	FBgn0000592	1712	GO:0052689,GO:0030728,GO:0034338,GO:0042811,GO:0005576,GO:1901575,GO:0046692,GO:0005615,GO:0046662,GO:0046693,GO:0046008,GO:0032504,GO:0007619,GO:0007618		0	0	0	0	0	0	0	0.09	0	0		0.18	0	0	0	0.08	0	0	0	0	0	0.31	0	0	0	0	0	0	0	0	0	0	0	0	0	0	0	0	0	0	0	0	0
Est-6	Esterase 6	FBtr0333383	FBgn0000592	1837	GO:0052689,GO:0030728,GO:0034338,GO:0042811,GO:0005576,GO:1901575,GO:0046692,GO:0005615,GO:0046662,GO:0046693,GO:0046008,GO:0032504,GO:0007619,GO:0007618		0	0	0.07	0	0	0	0	0	0	0		0	0	0	0	0	0	0	0	0	0	0	0	0	0	0	0	0	0	0	0	0	0	0	0.11	0	0	0	0	0	0	0	0
Est-P	Esterase P	FBtr0076004	FBgn0000594	1740	GO:0052689		3.03	2.31	2.2	6.76	0.06	0	4.17	0.95	0.06	1.01		0.39	0.46	0	0	4.94	0	0	10.28	30.91	0	3.1	0	0	0.94	0	0	1.98	0.15	0	0.68	0	13.02	0	0	8.23	0	0	0	0	0	0	0.89
eve	even skipped	FBtr0088390	FBgn0000606	1406	GO:0003705,GO:0007507,GO:0045944,GO:0008595,GO:0003007,GO:0000122,GO:0001709,GO:0007517,GO:0007417,GO:0007366,GO:0007377,GO:0007376,GO:0007512,GO:0007350,GO:0003700,GO:0009997,GO:0008045,GO:0000980,GO:0035289,GO:1901739,GO:0050770,GO:0045165,GO:0005634,GO:0035290		0	0	0	0	0	0	0	0	0	0		0.05	0	0	0	0	0	0	0	0	0	0	0	0	0	0	0	0	0	0	0	0	0	0	0	0.08	0	0	0	0	0	0	0
exd	extradenticle	FBtr0074135	FBgn0000611	2386	GO:0007420,GO:0003705,GO:0005737,GO:0035326,GO:0045944,GO:0007422,GO:0003677,GO:0043565,GO:0007479,GO:0008134,GO:0000060,GO:0005515,GO:0033613,GO:0003700,GO:0007432,GO:0001654,GO:0046982,GO:0007438,GO:0006357,GO:0005667,GO:0007525,GO:0005634,GO:0042659,GO:0003713		3.55	8.52	5.79	38.7	0	0	0	19.64	33.94	41.01		7.66	0	0	0.86	10.41	12.75	2.38	14.99	0.07	1.04	7.68	31.15	0.05	8.52	0	6.47	4.61	6.25	24.15	0.94	23.57	30.91	31.59	1.24	4.25	0.52	1.33	0	5.58	9.99	5.15	3.72
exd	extradenticle	FBtr0074137	FBgn0000611	2347	GO:0007420,GO:0003705,GO:0005737,GO:0035326,GO:0045944,GO:0007422,GO:0003677,GO:0043565,GO:0007479,GO:0008134,GO:0000060,GO:0005515,GO:0033613,GO:0003700,GO:0007432,GO:0001654,GO:0046982,GO:0007438,GO:0006357,GO:0005667,GO:0007525,GO:0005634,GO:0042659,GO:0003713		0.33	0	0	0	0	0	0	0	0	0		0.1	0	0	0	0	0	0	0	0	0	0	0	0	0	0	0	0	0	0	0	0	0	0	0	0	0	0	0	0	0	0	0
exd	extradenticle	FBtr0333322	FBgn0000611	2930	GO:0007420,GO:0003705,GO:0005737,GO:0035326,GO:0045944,GO:0007422,GO:0003677,GO:0043565,GO:0007479,GO:0008134,GO:0000060,GO:0005515,GO:0033613,GO:0003700,GO:0007432,GO:0001654,GO:0046982,GO:0007438,GO:0006357,GO:0005667,GO:0007525,GO:0005634,GO:0042659,GO:0003713		1.77	2.17	2.38	0	0	0	10.27	5.3	0	12.2		3.39	0	0	1.71	0	0	0	0	0	0	0	0	10.09	3.53	0	0	1.94	2.32	0	0	0	0	62.66	0	6.23	0	0	0	6.21	0	0	0
exd	extradenticle	FBtr0333323	FBgn0000611	2883	GO:0007420,GO:0003705,GO:0005737,GO:0035326,GO:0045944,GO:0007422,GO:0003677,GO:0043565,GO:0007479,GO:0008134,GO:0000060,GO:0005515,GO:0033613,GO:0003700,GO:0007432,GO:0001654,GO:0046982,GO:0007438,GO:0006357,GO:0005667,GO:0007525,GO:0005634,GO:0042659,GO:0003713		26.42	36.48	32.5	19.08	16.76	14.23	7.33	29.07	8.25	4.12		20.55	114.65	113.29	18.98	46.71	12.15	26.45	10.52	26.73	47.89	108.79	75.77	36.52	78.23	57.48	25.03	49.6	28.53	6.43	26.87	9.02	17.57	131.46	60.25	70.02	133.29	9.31	5.76	1.38	10.42	11.48	37.32
exu	exuperantia	FBtr0086242	FBgn0000615	2320	GO:0005737,GO:0045451,GO:0008595,GO:0042803,GO:0007317,GO:0004527,GO:0000932,GO:0071011,GO:0000398,GO:0046331,GO:0007283,GO:0001700,GO:0003727,GO:0045450,GO:0007300		0	0	0	0	0	0	0	0	0	0		0	0	0	0	0	0	0	0	0	0	0	0	0	0	0	0	0	0	0	0	0	0	0	0	0	0	0	0	0	0	0	0
exu	exuperantia	FBtr0086243	FBgn0000615	1988	GO:0005737,GO:0045451,GO:0008595,GO:0042803,GO:0007317,GO:0004527,GO:0000932,GO:0071011,GO:0000398,GO:0046331,GO:0007283,GO:0001700,GO:0003727,GO:0045450,GO:0007300		0	0	0	0	0	0	0	0	0	0		0	0	0	0	0	0.82	0	0	0	0	0	0	0	0	0	0	0	0	0	0	0.11	0	0	0	0	0	0	0	0	0	0	0
exu	exuperantia	FBtr0086244	FBgn0000615	2621	GO:0005737,GO:0045451,GO:0008595,GO:0042803,GO:0007317,GO:0004527,GO:0000932,GO:0071011,GO:0000398,GO:0046331,GO:0007283,GO:0001700,GO:0003727,GO:0045450,GO:0007300		0	0	0	0	0	0	0	0	0	0		0	0	0	0	0	0	0	0	0	0	0	0	0	0	0	0	0	0	0	0	0	0.87	0	0	0	0	0	0	0	0	0	0
exu	exuperantia	FBtr0302285	FBgn0000615	2631	GO:0005737,GO:0045451,GO:0008595,GO:0042803,GO:0007317,GO:0004527,GO:0000932,GO:0071011,GO:0000398,GO:0046331,GO:0007283,GO:0001700,GO:0003727,GO:0045450,GO:0007300		0	0	0	0	0	0	0	0	0	0		0	0	0	0	0	0	0	0	0	0	0	0	0	0	0	0	0	0	0	0	0	0	0	0	0	0	0	0	0	0	0	0
e(y)1	enhancer of yellow 1	FBtr0074463	FBgn0000617	1124	GO:0000124,GO:0001075,GO:0010906,GO:0046982,GO:0004402,GO:0030707,GO:0007221,GO:0005669,GO:0044212,GO:0043966,GO:0008134,GO:0005515,GO:0006367,GO:0090575,GO:0005634,GO:0006366		4.79	11.25	0.23	1.72	0	0.08	0.11	0.71	17.35	1.07		2.48	0	0	0	4.49	2.85	0.13	0	0	20.02	5.57	2.13	0	0	0	5.93	1.97	3.91	0	2.08	2.92	9.66	0	0.19	12.01	0	0	0.35	0.32	10.56	4.2	1.36
e(y)2	enhancer of yellow 2	FBtr0073540	FBgn0000618	503	GO:0000124,GO:0045944,GO:0071819,GO:0005643,GO:0045893,GO:0000785,GO:0070390,GO:0034399,GO:0001094,GO:0043035,GO:0016973,GO:0070742,GO:0005515,GO:0003682,GO:0031936,GO:0006406,GO:0016578,GO:0005634,GO:0003713		5.86	1.18	0.32	0.53	0	0	0	0.78	0	0.33		1.66	0	0	0	0	0	0	18.14	0	0	100.3	0	0	0	0	35.25	0	0	0	0.3	0	0	0	0	0	0	24.81	0	50.08	73.98	32.42	0
eyg	eyegone	FBtr0075979	FBgn0000625	2691	GO:0000977,GO:0000122,GO:0048749,GO:0035214,GO:0003700,GO:0001654,GO:0007477,GO:0001745,GO:0005634,GO:0007469,GO:0007435		0	0	0	0	0	0	0	0	0	0		0	0	0	0	0	0	0	0.12	0	0	0	0	0	0	0	0	0	0	0	0	0	0	0	0	0	0	0	0	0	0	0	0
eyg	eyegone	FBtr0100170	FBgn0000625	2624	GO:0000977,GO:0000122,GO:0048749,GO:0035214,GO:0003700,GO:0001654,GO:0007477,GO:0001745,GO:0005634,GO:0007469,GO:0007435		0	0	0	0	0	0	0	0	0	0		0	0	0	0	0	0	0	0	0	0	0	0	0	0	0	0	0	0.05	0	0	0	0	0	0	0	0	0	0	0	0	0	0
eyg	eyegone	FBtr0339921	FBgn0000625	3148	GO:0000977,GO:0000122,GO:0048749,GO:0035214,GO:0003700,GO:0001654,GO:0007477,GO:0001745,GO:0005634,GO:0007469,GO:0007435		0	0	0	0	0	0	0	0	0	0		0	0	0	0	0	0	0	0	0	0	0	0	0	0	0	0	0	0	0	0	0	0	0	0	0	0	0	0	0	0	0	0
E(z)	Enhancer of zeste	FBtr0076279	FBgn0000629	2650	GO:0022008,GO:0042054,GO:0000790,GO:0046976,GO:0003677,GO:0006723,GO:0051567,GO:0035097,GO:0007517,GO:0048813,GO:1902692,GO:0016571,GO:0031062,GO:0005515,GO:0007411,GO:0003700,GO:0045892,GO:0070734,GO:0005634,GO:0016458,GO:0035186,GO:0035098,GO:0046974		0	0	0	0	0	0	0	0	0	0		0	0	0	0	0	0	0	0	0	0	0	0	0	0	0	0	1.35	0	0	0	0	5.33	0	0	0	0	0	0	0	0	0	0
E(z)	Enhancer of zeste	FBtr0273338	FBgn0000629	2464	GO:0022008,GO:0042054,GO:0000790,GO:0046976,GO:0003677,GO:0006723,GO:0051567,GO:0035097,GO:0007517,GO:0048813,GO:1902692,GO:0016571,GO:0031062,GO:0005515,GO:0007411,GO:0003700,GO:0045892,GO:0070734,GO:0005634,GO:0016458,GO:0035186,GO:0035098,GO:0046974		0.12	5.07	0	50.55	20.34	0	1.45	9.95	0	8.9		1.1	1.6	26.17	0.09	13.83	0	0	3.96	0	0.11	2.89	2.12	2.77	7.88	0	0	3.52	7.47	0.45	31.12	5.64	22.85	19.72	0	9.01	0	6.29	0	1.28	0.57	1.82	9.8
E(z)	Enhancer of zeste	FBtr0334067	FBgn0000629	2479	GO:0022008,GO:0042054,GO:0000790,GO:0046976,GO:0003677,GO:0006723,GO:0051567,GO:0035097,GO:0007517,GO:0048813,GO:1902692,GO:0016571,GO:0031062,GO:0005515,GO:0007411,GO:0003700,GO:0045892,GO:0070734,GO:0005634,GO:0016458,GO:0035186,GO:0035098,GO:0046974		6.19	8.37	35.3	0	0	0	0	0	17.38	0		3.33	0	0	0	0	16.31	0	0	0	0	0	0	3.95	0	0	0	0	1.81	0	0	0	0	0	0	0	0	0	0	0	0	0	0
CG17716		FBtr0087625	FBgn0000633	5978			0	0	0	0	0	0	0	0	0	0		0	0	5.69	4.09	0	0	0	0	0	0	0	0	0	0	0	0	49.61	1.16	0	0	0	0	0	0	0	4.41	0	0	0	0	0	0
CG17716		FBtr0339940	FBgn0000633	5879			0.62	0.55	0.57	4.78	14.15	2.96	7.38	1.94	0.03	3.87		18.3	243.8	439.57	489.1	153.13	155.32	7.39	7.54	10.8	18.38	20.72	2.95	60.03	39.5	69.43	43.48	27.51	111.73	139.65	27.38	29.26	16.08	18.66	27.67	165.17	237.58	8.32	6.83	7.34	6.51	4.29	1.45
Fas2	Fasciclin 2	FBtr0070665	FBgn0000635	3439	GO:0005737,GO:0008582,GO:0008360,GO:0043005,GO:0042995,GO:0035159,GO:0005886,GO:0007413,GO:0036062,GO:0007612,GO:0048803,GO:0008355,GO:0016319,GO:0008038,GO:0042059,GO:0008045,GO:0048667,GO:0048167,GO:0001746,GO:0005829,GO:0016021,GO:0050808,GO:0045211,GO:0061174,GO:0007528,GO:1904800,GO:0007156,GO:0072553,GO:0048149,GO:0030424,GO:0005515,GO:0042734,GO:0048786,GO:0050803,GO:0035158,GO:0031594,GO:…		1.1	0	0.56	0	0	0	0	0.8	0	0.17		1.43	0	0	0	0	4.43	1.43	0.05	0	0	1.65	10.98	1.04	0.9	4.49	0	0.31	5.19	1.02	7.77	1.72	1.63	0.36	0	0	0	0	0	2.19	0	0	0
Fas2	Fasciclin 2	FBtr0070666	FBgn0000635	2894	GO:0005737,GO:0008582,GO:0008360,GO:0043005,GO:0042995,GO:0035159,GO:0005886,GO:0007413,GO:0036062,GO:0007612,GO:0048803,GO:0008355,GO:0016319,GO:0008038,GO:0042059,GO:0008045,GO:0048667,GO:0048167,GO:0001746,GO:0005829,GO:0016021,GO:0050808,GO:0045211,GO:0061174,GO:0007528,GO:1904800,GO:0007156,GO:0072553,GO:0048149,GO:0030424,GO:0005515,GO:0042734,GO:0048786,GO:0050803,GO:0035158,GO:0031594,GO:…		10.02	9.14	18.64	0.08	1.09	0.4	0.65	25.81	2.29	13.33		1.82	20.56	0	0.16	1.84	0	0.14	1.13	0	8.68	20.92	108.82	16.37	20.85	98.93	4.64	9.57	77.15	35.2	8.14	18.07	20.82	6.36	12.9	42.5	3.72	0	0	0	0	0.3	4.73
Fas2	Fasciclin 2	FBtr0070667	FBgn0000635	4225	GO:0005737,GO:0008582,GO:0008360,GO:0043005,GO:0042995,GO:0035159,GO:0005886,GO:0007413,GO:0036062,GO:0007612,GO:0048803,GO:0008355,GO:0016319,GO:0008038,GO:0042059,GO:0008045,GO:0048667,GO:0048167,GO:0001746,GO:0005829,GO:0016021,GO:0050808,GO:0045211,GO:0061174,GO:0007528,GO:1904800,GO:0007156,GO:0072553,GO:0048149,GO:0030424,GO:0005515,GO:0042734,GO:0048786,GO:0050803,GO:0035158,GO:0031594,GO:…		52.93	58.54	85.38	11.05	0	9.96	6.96	78	50.83	62.89		4.72	222.29	0.16	1.35	0	0	26.04	4.67	57.11	41.06	63.93	169.73	37.75	96.45	140.55	191.96	41	33.79	19.63	18.72	57.54	11.94	25.78	38.9	7.02	6.32	0	0	0.62	0	0	70.39
Fas2	Fasciclin 2	FBtr0336882	FBgn0000635	3352	GO:0005737,GO:0008582,GO:0008360,GO:0043005,GO:0042995,GO:0035159,GO:0005886,GO:0007413,GO:0036062,GO:0007612,GO:0048803,GO:0008355,GO:0016319,GO:0008038,GO:0042059,GO:0008045,GO:0048667,GO:0048167,GO:0001746,GO:0005829,GO:0016021,GO:0050808,GO:0045211,GO:0061174,GO:0007528,GO:1904800,GO:0007156,GO:0072553,GO:0048149,GO:0030424,GO:0005515,GO:0042734,GO:0048786,GO:0050803,GO:0035158,GO:0031594,GO:…		0	0	0	0.4	3.89	0	0	0	0	0		0	0	0	0	0	9.6	0	0	0	0	0	0	0	0	0	0	0	0	0	0	0	0	0	0	0	0	0	0	0	0.6	0	0
Fas2	Fasciclin 2	FBtr0336884	FBgn0000635	4893	GO:0005737,GO:0008582,GO:0008360,GO:0043005,GO:0042995,GO:0035159,GO:0005886,GO:0007413,GO:0036062,GO:0007612,GO:0048803,GO:0008355,GO:0016319,GO:0008038,GO:0042059,GO:0008045,GO:0048667,GO:0048167,GO:0001746,GO:0005829,GO:0016021,GO:0050808,GO:0045211,GO:0061174,GO:0007528,GO:1904800,GO:0007156,GO:0072553,GO:0048149,GO:0030424,GO:0005515,GO:0042734,GO:0048786,GO:0050803,GO:0035158,GO:0031594,GO:…		69	74.32	80.36	18.75	5.25	15.98	29.9	100.08	49.62	78.56		11.87	234.92	0.5	4.45	0.44	0.37	13.92	22.77	57.81	35.25	114.83	839.91	153.27	188.11	363.28	123.66	53.42	21.03	12.07	83.61	93.59	41.15	166.63	67.54	128.58	22.03	0	0.07	3.32	0	0.34	44.47
Fas2	Fasciclin 2	FBtr0343523	FBgn0000635	3475	GO:0005737,GO:0008582,GO:0008360,GO:0043005,GO:0042995,GO:0035159,GO:0005886,GO:0007413,GO:0036062,GO:0007612,GO:0048803,GO:0008355,GO:0016319,GO:0008038,GO:0042059,GO:0008045,GO:0048667,GO:0048167,GO:0001746,GO:0005829,GO:0016021,GO:0050808,GO:0045211,GO:0061174,GO:0007528,GO:1904800,GO:0007156,GO:0072553,GO:0048149,GO:0030424,GO:0005515,GO:0042734,GO:0048786,GO:0050803,GO:0035158,GO:0031594,GO:…		0	0	0	0	0	0	0	0.19	0.23	0.32		0.32	0	0	0	0	0	0.05	0	0	0	0.57	1.58	0.98	3.73	1.06	0	0.49	0.37	9.78	0	0	0	0.84	3.43	0.64	0	0	0	0.24	0	0	0.15
Fas2	Fasciclin 2	FBtr0343524	FBgn0000635	3260	GO:0005737,GO:0008582,GO:0008360,GO:0043005,GO:0042995,GO:0035159,GO:0005886,GO:0007413,GO:0036062,GO:0007612,GO:0048803,GO:0008355,GO:0016319,GO:0008038,GO:0042059,GO:0008045,GO:0048667,GO:0048167,GO:0001746,GO:0005829,GO:0016021,GO:0050808,GO:0045211,GO:0061174,GO:0007528,GO:1904800,GO:0007156,GO:0072553,GO:0048149,GO:0030424,GO:0005515,GO:0042734,GO:0048786,GO:0050803,GO:0035158,GO:0031594,GO:…		8.03	2.82	7.79	3.25	0	1.76	0.73	10.02	1.45	7.24		0.62	3.69	0	0	0	0	2.47	0.53	0.06	0	0.98	47.27	7.36	66.48	7.64	23.51	13.13	11.43	0.4	2.44	8.1	5.1	0.63	54.25	4.28	70.72	0	0	1.91	0	0	7.38
Fas3	Fasciclin 3	FBtr0081051	FBgn0000636	3336	GO:0005737,GO:0005887,GO:0005913,GO:0031965,GO:0007157,GO:0007156,GO:0016328,GO:0005886,GO:0007413,GO:0004872,GO:0042803,GO:0008355,GO:0016323,GO:0005102,GO:0055037,GO:0007411,GO:0005918,GO:0008039,GO:0031594,GO:0005829,GO:0007611,GO:0050839,GO:0030707,GO:0005920,GO:0016200		0	1.61	2.6	0.97	0	0	0	0.64	0	0		1.22	0	0	0	0	0	0	0	0	0	5.75	0	6.21	0	0	0	1.28	0.39	0	0	0	0	13.08	0	0	0	0	0	0	0	0	0
Fas3	Fasciclin 3	FBtr0081052	FBgn0000636	2952	GO:0005737,GO:0005887,GO:0005913,GO:0031965,GO:0007157,GO:0007156,GO:0016328,GO:0005886,GO:0007413,GO:0004872,GO:0042803,GO:0008355,GO:0016323,GO:0005102,GO:0055037,GO:0007411,GO:0005918,GO:0008039,GO:0031594,GO:0005829,GO:0007611,GO:0050839,GO:0030707,GO:0005920,GO:0016200		0.18	0	0	0.26	0	0.76	0	0	0	0		0	0	0	0	0	0	0	0	0	0	0	2.31	0	0.27	0.89	0	0	2.74	0	0.6	0	0	7.65	0	2.65	0	1.19	0	0	0	0	0
Fas3	Fasciclin 3	FBtr0112804	FBgn0000636	2671	GO:0005737,GO:0005887,GO:0005913,GO:0031965,GO:0007157,GO:0007156,GO:0016328,GO:0005886,GO:0007413,GO:0004872,GO:0042803,GO:0008355,GO:0016323,GO:0005102,GO:0055037,GO:0007411,GO:0005918,GO:0008039,GO:0031594,GO:0005829,GO:0007611,GO:0050839,GO:0030707,GO:0005920,GO:0016200		0	0	0.15	0	0	0	0	0	0	0		0.37	0	0	0	0	0	0	0.92	0	0	0	36.06	1.14	0	2.96	0	6.13	0	0.69	0	0.78	0	2.8	0	0	0	0	0	0	0	0	0
Fas3	Fasciclin 3	FBtr0112805	FBgn0000636	4084	GO:0005737,GO:0005887,GO:0005913,GO:0031965,GO:0007157,GO:0007156,GO:0016328,GO:0005886,GO:0007413,GO:0004872,GO:0042803,GO:0008355,GO:0016323,GO:0005102,GO:0055037,GO:0007411,GO:0005918,GO:0008039,GO:0031594,GO:0005829,GO:0007611,GO:0050839,GO:0030707,GO:0005920,GO:0016200		1.1	0.11	0.68	0	0.39	0	0	0.14	0	0		2.65	0.1	0	4.43	0	0	0	0	0	0	4.43	29.33	12.98	3.39	0.16	0	10.79	1.18	0.07	0.79	1.47	0.73	18.32	0	5.11	0.57	0	0	0	0	0	0
Fas3	Fasciclin 3	FBtr0301391	FBgn0000636	2567	GO:0005737,GO:0005887,GO:0005913,GO:0031965,GO:0007157,GO:0007156,GO:0016328,GO:0005886,GO:0007413,GO:0004872,GO:0042803,GO:0008355,GO:0016323,GO:0005102,GO:0055037,GO:0007411,GO:0005918,GO:0008039,GO:0031594,GO:0005829,GO:0007611,GO:0050839,GO:0030707,GO:0005920,GO:0016200		0	0	0	0	0	0	0	0	0	0		0	0	0	0	13.35	0	0	0	0	0	0	0	0	0	1.39	1.28	0	0	0	0.5	0	0	2.44	0	0	0	0	0	0	0	0	1
Fas3	Fasciclin 3	FBtr0340580	FBgn0000636	2422	GO:0005737,GO:0005887,GO:0005913,GO:0031965,GO:0007157,GO:0007156,GO:0016328,GO:0005886,GO:0007413,GO:0004872,GO:0042803,GO:0008355,GO:0016323,GO:0005102,GO:0055037,GO:0007411,GO:0005918,GO:0008039,GO:0031594,GO:0005829,GO:0007611,GO:0050839,GO:0030707,GO:0005920,GO:0016200		3.74	3.01	3.86	1.58	2.77	0.49	15.72	14.34	0.38	0.15		3.74	0.28	48.61	0	0	0	0.06	0	8.54	4.07	0	83.48	59.3	27.62	0	0	19.42	2.65	22.03	1.2	6.09	6.72	23.68	5.16	4.07	542.27	0	0	0	0.72	0.93	3.9
Fas3	Fasciclin 3	FBtr0344782	FBgn0000636	3265	GO:0005737,GO:0005887,GO:0005913,GO:0031965,GO:0007157,GO:0007156,GO:0016328,GO:0005886,GO:0007413,GO:0004872,GO:0042803,GO:0008355,GO:0016323,GO:0005102,GO:0055037,GO:0007411,GO:0005918,GO:0008039,GO:0031594,GO:0005829,GO:0007611,GO:0050839,GO:0030707,GO:0005920,GO:0016200		0	0	0	0	0	0	0	0	0	0		0	0	0	0	0	0	0	0	0	0	0	1.7	0	0	0	0	3.5	0	2.61	0	0	0	0	0	5.25	0	0	0	0	0	0	0
Fbp1	Fat body protein 1	FBtr0075749	FBgn0000639	3405	GO:0015032,GO:0008565		0	0	0	0	0	0	0	0	0	0		0	0	0	0	0	0	0	0	0	0	0	0	0	0	0	0	0	0	0	0	0	0	0	0	0	0	0	0	0	0	0	0
Fbp1	Fat body protein 1	FBtr0075750	FBgn0000639	3465	GO:0015032,GO:0008565		0	0	0	0	0	0	0	0	0	0		0	0	0	0	0	0	0	0	0	0	0	0	0	0	0	0	0	0	0	0	0	0	0	0	0	0	0	0	0	0	0	0
Fbp1	Fat body protein 1	FBtr0339515	FBgn0000639	3399	GO:0015032,GO:0008565		0	0	0	0	0	0	0	0	0	0		0	0	0	0	0	0	0	0	0	0	0.33	0	0.54	0.04	0.22	0	7.64	0	0	0	0	0	0	10.21	0	0	0	0	0	0	0	0
Fbp2	Fat body protein 2	FBtr0079808	FBgn0000640	916	GO:0045735,GO:0055114,GO:0004022		0	0	0	0	0	0	0	0	0	0		0	0	0	0	0	0	0	0	0	0	0	0	0	0	0	0	0	0	0	0	0	0	0	0	0	0	0	0	0	0	0	0
Fbp2	Fat body protein 2	FBtr0343428	FBgn0000640	1074	GO:0045735,GO:0055114,GO:0004022		0	0	0	0	0	0	0	0	0	0		0	0	0	0	0	0	0	0	0	0	0	0	0	0	0	0	0	0	0	0	0	0	0	0	0	0	0	0	0	0	0	0
Fbp2	Fat body protein 2	FBtr0343429	FBgn0000640	871	GO:0045735,GO:0055114,GO:0004022		0	0	0	0	0	0	0	0	0	0		0	0	0	0	0	0	0	0	0	0	0	0	0.18	0	0	0	0	0	0	0	0	0	0	0	0	0	0	0	0	0	0	0
Fcp3C	Follicle cell protein 3C	FBtr0070542	FBgn0000644	963	GO:0008150,GO:0003674,GO:0005575		0	0	0.41	0	0	0	0	0	0	0		0	0	0	0	0	0	0	0	0	0	0	0	0	0	0	0	0	0	0	0	0	0	0	0	0	0	0	0	0	4.04	0	0
fj	four-jointed	FBtr0086754	FBgn0000658	3551	GO:0007474,GO:0017147,GO:0004672,GO:0035159,GO:0005886,GO:0045198,GO:0007267,GO:0060071,GO:0001736,GO:0016348,GO:0001737,GO:0044719,GO:0007446,GO:0005615,GO:0043393,GO:0006468,GO:0042067		0	0	0	0	0	0	0	0	0	0		0.27	0	0	0	0	0	0	0	0	0	0	0	0	0	0	0	0	0	0	0	0	0	0	0	0	0	0	0	0	0	0	0
fkh	fork head	FBtr0085321	FBgn0000659	3280	GO:0007443,GO:0042023,GO:0007439,GO:0045944,GO:0000977,GO:0000122,GO:0030308,GO:0008134,GO:0000981,GO:0061101,GO:0043069,GO:0005700,GO:0007431,GO:0040015,GO:0035072,GO:0043066,GO:0001706,GO:0006357,GO:0005634,GO:0019904,GO:0007435		0	0	0	0	0	0	0	0	0	0.04		0	0	0	20.21	0	0	0.04	4.19	0	0	0	0.04	0	0	0.09	1.6	0	0.87	0	0	0	0	0	0	0	0	0	0	0	0	0	0
fkh	fork head	FBtr0300259	FBgn0000659	4030	GO:0007443,GO:0042023,GO:0007439,GO:0045944,GO:0000977,GO:0000122,GO:0030308,GO:0008134,GO:0000981,GO:0061101,GO:0043069,GO:0005700,GO:0007431,GO:0040015,GO:0035072,GO:0043066,GO:0001706,GO:0006357,GO:0005634,GO:0019904,GO:0007435		0	0	0	0	0	0	0	0	0	0		1	2.21	0	0.37	0	0	0	0.22	0	1.18	1.79	0	0	0.37	0.13	0	0	0	0	0	0	3.3	0	0.02	0.52	9.22	0	0	0	0	0	0
fkh	fork head	FBtr0330333	FBgn0000659	4030	GO:0007443,GO:0042023,GO:0007439,GO:0045944,GO:0000977,GO:0000122,GO:0030308,GO:0008134,GO:0000981,GO:0061101,GO:0043069,GO:0005700,GO:0007431,GO:0040015,GO:0035072,GO:0043066,GO:0001706,GO:0006357,GO:0005634,GO:0019904,GO:0007435		0	0	0	0	0	0	0	0	0	0		1	2.21	0	0.37	0	0	0	0.22	0	1.18	1.79	0	0	0.37	0.13	0	0	0	0	0	0	3.3	0	0.02	0.52	9.22	0	0	0	0	0	0
fkh	fork head	FBtr0345227	FBgn0000659	4289	GO:0007443,GO:0042023,GO:0007439,GO:0045944,GO:0000977,GO:0000122,GO:0030308,GO:0008134,GO:0000981,GO:0061101,GO:0043069,GO:0005700,GO:0007431,GO:0040015,GO:0035072,GO:0043066,GO:0001706,GO:0006357,GO:0005634,GO:0019904,GO:0007435		0	0	0	0	0	0	0	0	0	0		6.59	0	0	0	0	0	0	0	0	0	0.48	0	22.97	0	0	0	3.89	0	0	0	0	0.54	0.17	0	0	2.56	0	0	0.07	0	0.25	0
fkh	fork head	FBtr0346765	FBgn0000659	4030	GO:0007443,GO:0042023,GO:0007439,GO:0045944,GO:0000977,GO:0000122,GO:0030308,GO:0008134,GO:0000981,GO:0061101,GO:0043069,GO:0005700,GO:0007431,GO:0040015,GO:0035072,GO:0043066,GO:0001706,GO:0006357,GO:0005634,GO:0019904,GO:0007435		0	0	0	0	0	0	0	0	0	0		1	2.21	0	0.37	0	0	0	0.22	0	1.18	1.79	0	0	0.37	0.13	0	0	0	0	0	0	3.3	0	0.02	0.52	9.22	0	0	0	0	0	0
fl(2)d	female lethal d	FBtr0087647	FBgn0000662	2567	GO:0000381,GO:0019099,GO:0007530,GO:0080009,GO:0048749,GO:0007539,GO:0005515,GO:0046331,GO:0070868,GO:0000375,GO:0005634		76.06	102.36	116.29	56.27	101.77	90.51	20.62	91.52	87.9	93.19		29.22	164.33	527.07	150.99	77.48	68.09	10.75	12.12	26.71	73.51	54.04	101.01	113.46	280.83	59.68	92.7	61.1	68.74	24.75	55.73	92.29	62.2	101.29	152.06	88.48	123.32	0	1.77	3.71	2.45	4	18.43
fl(2)d	female lethal d	FBtr0087648	FBgn0000662	2248	GO:0000381,GO:0019099,GO:0007530,GO:0080009,GO:0048749,GO:0007539,GO:0005515,GO:0046331,GO:0070868,GO:0000375,GO:0005634		0	0	0	6.77	0.13	0	0	0	0	0		0.24	1.06	0	0	0	0	0	0	0	0	0	0.22	0	0	0	0	0	0	0	0	14.9	0	0	0	0	0	0	0.22	0	2.01	0	0
fl(2)d	female lethal d	FBtr0304696	FBgn0000662	2435	GO:0000381,GO:0019099,GO:0007530,GO:0080009,GO:0048749,GO:0007539,GO:0005515,GO:0046331,GO:0070868,GO:0000375,GO:0005634		0	0	0	0	0	0	19.71	0	0	0		0	0	37.34	0	0	0	0	0	0	0	0	0	0	0	0	0.8	0	0	0	0	0	0	0	0	10.68	0	0	0	0	0	0	0
fl(2)d	female lethal d	FBtr0304697	FBgn0000662	2485	GO:0000381,GO:0019099,GO:0007530,GO:0080009,GO:0048749,GO:0007539,GO:0005515,GO:0046331,GO:0070868,GO:0000375,GO:0005634		3.43	3.7	3.64	2.57	0	0	2.41	14.78	5.86	3.69		2.12	0	18.77	34.3	9.03	0	8.94	0.38	0	0	16.99	1.26	2.17	0.35	68.3	0	5.46	2.08	0	2.78	1.67	1.81	42.65	0	8.37	0	1.68	0	1.59	0	1.41	0
Actn	alpha actinin	FBtr0070343	FBgn0000667	3511	GO:0051015,GO:0005925,GO:0031532,GO:0045214,GO:0003779,GO:0005509,GO:0007016,GO:0030018,GO:0005515,GO:0051017,GO:0007629		0	0.91	0	0	0	0	0	0	0	0		0	0	0	0	0	0	0	0	0	0	0	0	0	0	0	0	0	0	0	4.86	0	0	0	0	0	0	0	0	0	0	0	0.2
Actn	alpha actinin	FBtr0070344	FBgn0000667	3511	GO:0051015,GO:0005925,GO:0031532,GO:0045214,GO:0003779,GO:0005509,GO:0007016,GO:0030018,GO:0005515,GO:0051017,GO:0007629		5.02	0	2.87	0	0	0	0	0	0	0		0.24	0	0	0	5.81	0	0	0	0	0	0.09	0	0	0	0	0	0	3.3	0	4.86	16.04	3.06	3.64	0	0	0	0	0	0	0	0	0.2
Actn	alpha actinin	FBtr0070345	FBgn0000667	4868	GO:0051015,GO:0005925,GO:0031532,GO:0045214,GO:0003779,GO:0005509,GO:0007016,GO:0030018,GO:0005515,GO:0051017,GO:0007629		11.34	14.59	8.23	12.01	9.92	0.2	10.53	2.65	2.49	4.27		2.57	16.74	9.47	10.5	8.2	15.67	1.77	9.85	2.91	10.68	8.2	7	12.78	9.22	6.79	2.5	17.56	6.94	0	3.12	4.07	5.8	9.76	9	14.52	181.06	5.28	2.31	3.31	3.62	0.55	5.47
Actn	alpha actinin	FBtr0303048	FBgn0000667	3306	GO:0051015,GO:0005925,GO:0031532,GO:0045214,GO:0003779,GO:0005509,GO:0007016,GO:0030018,GO:0005515,GO:0051017,GO:0007629		0	0	0.32	0	0	0	0	0	0	0		0.69	0	14.74	0	0	0	1.94	8.56	0	0	0	0	0	7.14	0	0	0	0	6.19	0	0	0	0	0	0	0	0	0	0	2.51	0	1.46
Actn	alpha actinin	FBtr0310657	FBgn0000667	3877	GO:0051015,GO:0005925,GO:0031532,GO:0045214,GO:0003779,GO:0005509,GO:0007016,GO:0030018,GO:0005515,GO:0051017,GO:0007629		0	0.37	0	1.26	0	0	0	0	0.25	0		0.52	1.27	0	0	0	0	0	0	0	0.25	0	0	0.42	0	0	0	0	0	1.17	0	3.11	0	0	4.34	0.08	0	0	0	0	0	0	0
Actn	alpha actinin	FBtr0310658	FBgn0000667	3369	GO:0051015,GO:0005925,GO:0031532,GO:0045214,GO:0003779,GO:0005509,GO:0007016,GO:0030018,GO:0005515,GO:0051017,GO:0007629		0	0	0	0	0	0	0	0	0	0		0	0	0	0	0	0	0	0	0	0	0	0	0	0	0	0	0	0	0	0	0	0	0	0	0	0	0	0	0	0	0	0
Actn	alpha actinin	FBtr0310659	FBgn0000667	3351	GO:0051015,GO:0005925,GO:0031532,GO:0045214,GO:0003779,GO:0005509,GO:0007016,GO:0030018,GO:0005515,GO:0051017,GO:0007629		0	0	0	0	0	0	0	0	0	0		0	0	0	0	0	0	0	0	0	0	0	0	0	0	0	0	0	0	0	0	0	0	0	0	0	0	0	0	0	0	0	0
Actn	alpha actinin	FBtr0333801	FBgn0000667	3516	GO:0051015,GO:0005925,GO:0031532,GO:0045214,GO:0003779,GO:0005509,GO:0007016,GO:0030018,GO:0005515,GO:0051017,GO:0007629		0.55	0.2	0	0	0	0	0	1.26	0.03	1.71		0	0	0	0	0	0.74	0	0	0	0	0.34	0	0	0	0	7.67	0	0	0	0	0	0.7	0	0	0	0.25	0	0	0	0	0	0
Actn	alpha actinin	FBtr0333802	FBgn0000667	3366	GO:0051015,GO:0005925,GO:0031532,GO:0045214,GO:0003779,GO:0005509,GO:0007016,GO:0030018,GO:0005515,GO:0051017,GO:0007629		0	0	0	0	0	0	0	0	0	0		0	0	0	0	0	0	0	0	0	0	0	0	0	0	0	0	0	0	0	0	0	0	0	0	0	0	0	0	0	0	0	0
fliI	flightless I	FBtr0077192	FBgn0000709	4827	GO:0051015,GO:0003779,GO:0005509,GO:0010004,GO:0007527,GO:0030239,GO:0051014,GO:0007629		19.66	22.46	19.77	12.23	0.16	1.43	13.12	22.06	5.37	7.1		3.85	1.81	3.16	9.42	14.49	30.46	0.9	6.98	0.37	0.11	3.01	3.99	5.36	22.81	0.98	17.03	14.32	21.75	7.52	24.86	7.3	3.31	10.83	0.12	12.97	0.19	3.12	1.06	0.12	2.51	0.22	0.05
flw	flapwing	FBtr0071446	FBgn0000711	2524	GO:0090263,GO:0007059,GO:1904886,GO:0046329,GO:0007498,GO:0007312,GO:0004722,GO:0017018,GO:0007300,GO:0000164,GO:0014706,GO:0007476,GO:0007301,GO:0006470,GO:0031991		28.71	15.75	39.86	25.24	0.58	17.21	54.28	57.5	16.41	46.65		9.35	0	0	0	2.49	17.54	6.68	38.15	0	3.68	6.64	9.09	71.04	5.89	26.86	0	22.71	45.2	24.24	0.55	35.93	13.16	61.08	4.1	10.15	102.76	0	0	0.74	7.21	0	0
flw	flapwing	FBtr0071447	FBgn0000711	2131	GO:0090263,GO:0007059,GO:1904886,GO:0046329,GO:0007498,GO:0007312,GO:0004722,GO:0017018,GO:0007300,GO:0000164,GO:0014706,GO:0007476,GO:0007301,GO:0006470,GO:0031991		35.84	45.79	0	18.6	0	47.23	0	0	13.91	48.89		32.78	69.91	86.19	0	0.62	0	53.92	0	105.91	0	50.68	1.35	0	0	0	0	0	0	0	14.57	0.06	26.06	0	0	59.78	0	66.03	21.59	24.25	45.16	15.01	4.7
flw	flapwing	FBtr0333305	FBgn0000711	3883	GO:0090263,GO:0007059,GO:1904886,GO:0046329,GO:0007498,GO:0007312,GO:0004722,GO:0017018,GO:0007300,GO:0000164,GO:0014706,GO:0007476,GO:0007301,GO:0006470,GO:0031991		18.88	22.11	28.19	6.4	3.78	22.19	11.38	21.18	15.85	19.88		17.32	68.89	30.81	90.38	28.88	4.19	4.58	11.88	11.99	63.38	48.04	40.8	43.73	28.02	0.67	9.61	17.22	13.13	13.45	3.54	0.67	11.16	41.37	54.35	55.01	15.85	28.67	32.82	22.29	25.42	19.83	5.22
FMRFa	FMRFamide	FBtr0088383	FBgn0000715	1427	GO:0005179,GO:0008345,GO:0006942,GO:0005615,GO:0008344,GO:0045822,GO:0007218,GO:0002209,GO:1900075,GO:0010459,GO:0071855		0.6	6.67	1.14	0	0	0	0	6.89	28.41	6.32		0.23	0	0	0	25.65	0	0	0	0.57	0	0	0	0	0	0	0	5.11	0	0	0	0	0	2.21	0	0	0	0	0	0	0	0	0
fog	folded gastrulation	FBtr0077342	FBgn0000719	4647	GO:0070252,GO:0007374,GO:0005737,GO:0008293,GO:0007509,GO:0060662,GO:0007362,GO:0008360,GO:0043519,GO:0007399,GO:0040034,GO:0007370,GO:0005576,GO:0007498,GO:0021782,GO:0003384,GO:0003383,GO:0007411,GO:0007369,GO:0048383,GO:0007476,GO:0001664,GO:0016331,GO:0007472,GO:0000266,GO:0007186,GO:0007435		0	0.42	0	0	0.51	0	0	0	0	0		0	0	0	0	0	0	0	0	0	0	0	0.54	0	0	0	0	1.21	0	0	0	0	0	0.32	0	0	0	0	0	0	0	0	0
fog	folded gastrulation	FBtr0100538	FBgn0000719	3937	GO:0070252,GO:0007374,GO:0005737,GO:0008293,GO:0007509,GO:0060662,GO:0007362,GO:0008360,GO:0043519,GO:0007399,GO:0040034,GO:0007370,GO:0005576,GO:0007498,GO:0021782,GO:0003384,GO:0003383,GO:0007411,GO:0007369,GO:0048383,GO:0007476,GO:0001664,GO:0016331,GO:0007472,GO:0000266,GO:0007186,GO:0007435		0	0	0	0	0	0	0	0	0	0		9.03	0.96	0	0	0	0	0	0	0	0	0	0	10.87	1.98	0.16	0	1.97	0	0	0	0	18.04	0.85	0	0	0	0	0	0	0	0	0
fog	folded gastrulation	FBtr0333179	FBgn0000719	4504	GO:0070252,GO:0007374,GO:0005737,GO:0008293,GO:0007509,GO:0060662,GO:0007362,GO:0008360,GO:0043519,GO:0007399,GO:0040034,GO:0007370,GO:0005576,GO:0007498,GO:0021782,GO:0003384,GO:0003383,GO:0007411,GO:0007369,GO:0048383,GO:0007476,GO:0001664,GO:0016331,GO:0007472,GO:0000266,GO:0007186,GO:0007435		3.89	1.32	0.66	1.57	0	0	1.19	1.46	0	0.21		0.88	0.51	0	0	0.14	4.09	1.24	2.45	6.08	0.47	3.09	0.51	4.61	0	0	0	0.15	1.9	1.83	0	0	0.35	1.45	0	1.69	0	0	0	0	0.83	0	0.07
fog	folded gastrulation	FBtr0333180	FBgn0000719	3188	GO:0070252,GO:0007374,GO:0005737,GO:0008293,GO:0007509,GO:0060662,GO:0007362,GO:0008360,GO:0043519,GO:0007399,GO:0040034,GO:0007370,GO:0005576,GO:0007498,GO:0021782,GO:0003384,GO:0003383,GO:0007411,GO:0007369,GO:0048383,GO:0007476,GO:0001664,GO:0016331,GO:0007472,GO:0000266,GO:0007186,GO:0007435		0	0	1.53	0.1	0	0	19.92	1.03	0	0		0	0	0	2.28	0	0	0	0	0	0	0	0	0	0	1.77	2.47	7.59	0	0.04	0	0.03	2.48	0	0	0	1.83	0	0	1.4	0	0	0
fog	folded gastrulation	FBtr0333181	FBgn0000719	3825	GO:0070252,GO:0007374,GO:0005737,GO:0008293,GO:0007509,GO:0060662,GO:0007362,GO:0008360,GO:0043519,GO:0007399,GO:0040034,GO:0007370,GO:0005576,GO:0007498,GO:0021782,GO:0003384,GO:0003383,GO:0007411,GO:0007369,GO:0048383,GO:0007476,GO:0001664,GO:0016331,GO:0007472,GO:0000266,GO:0007186,GO:0007435		0	0	0.75	0	0	0	0	0	0.16	0		9.4	0	0	0	0	0.53	0	0	0	0	0	0.87	4.94	0	0	0	0	0	0	0.03	0	0	0	0	0	0	0	0.34	1.38	0.1	4.69	0
fog	folded gastrulation	FBtr0333182	FBgn0000719	5256	GO:0070252,GO:0007374,GO:0005737,GO:0008293,GO:0007509,GO:0060662,GO:0007362,GO:0008360,GO:0043519,GO:0007399,GO:0040034,GO:0007370,GO:0005576,GO:0007498,GO:0021782,GO:0003384,GO:0003383,GO:0007411,GO:0007369,GO:0048383,GO:0007476,GO:0001664,GO:0016331,GO:0007472,GO:0000266,GO:0007186,GO:0007435		1.05	1.01	0	0.64	0	0.29	1.01	0.4	0	3.42		0.24	0	0	0	0	0	0	0	0	0.45	1.91	0.31	0.06	0.03	0	0	0	4.96	0.14	0	0	0.04	0.02	0	0.74	0	0.86	0	0.56	3.63	0	0.6
for	foraging	FBtr0089304	FBgn0000721	4595	GO:0046959,GO:0005737,GO:0008345,GO:0009744,GO:0004692,GO:0004690,GO:0005524,GO:0005886,GO:0004674,GO:0008016,GO:0008045,GO:0006468,GO:0032095,GO:0007631,GO:0007616,GO:0005829,GO:0007614,GO:0030510,GO:0030536		0	0	0	0	0	0	0	0	0	0		5.45	0	0	0	0	0.29	0	0	0	0	0	0	0	0	0	0	0	0	0	0	0	0	0	0	0	0	0	0	0	0	0	0
for	foraging	FBtr0089306	FBgn0000721	4338	GO:0046959,GO:0005737,GO:0008345,GO:0009744,GO:0004692,GO:0004690,GO:0005524,GO:0005886,GO:0004674,GO:0008016,GO:0008045,GO:0006468,GO:0032095,GO:0007631,GO:0007616,GO:0005829,GO:0007614,GO:0030510,GO:0030536		0	0	0	0	0	0	0	0	0	0		0	0	0	0	0	0	0	0	0	0	0	0	0	0	0	0	0	0	0	0	0	0	0	0	0	0	0	0	0	0	0	0
for	foraging	FBtr0089307	FBgn0000721	3778	GO:0046959,GO:0005737,GO:0008345,GO:0009744,GO:0004692,GO:0004690,GO:0005524,GO:0005886,GO:0004674,GO:0008016,GO:0008045,GO:0006468,GO:0032095,GO:0007631,GO:0007616,GO:0005829,GO:0007614,GO:0030510,GO:0030536		0	0	0	0	0	0	0	0	0	0		0	0	0	0	0	0	0	0	0	0	0	0	0	0	0	0	0	0	0	0	0	0	0	0	0	0	0	0	0	0	0	0
for	foraging	FBtr0089308	FBgn0000721	4218	GO:0046959,GO:0005737,GO:0008345,GO:0009744,GO:0004692,GO:0004690,GO:0005524,GO:0005886,GO:0004674,GO:0008016,GO:0008045,GO:0006468,GO:0032095,GO:0007631,GO:0007616,GO:0005829,GO:0007614,GO:0030510,GO:0030536		0	0	0	0	0	0	0	0	0	0		0.16	0	0	0	0	0	0	0	0	0	0	0	0	0	0	0	0	0	0	0	0	0	0	0	0	0	0	0	0	0	0	0
for	foraging	FBtr0089309	FBgn0000721	3826	GO:0046959,GO:0005737,GO:0008345,GO:0009744,GO:0004692,GO:0004690,GO:0005524,GO:0005886,GO:0004674,GO:0008016,GO:0008045,GO:0006468,GO:0032095,GO:0007631,GO:0007616,GO:0005829,GO:0007614,GO:0030510,GO:0030536		0	0	0	0	0	0	0	0	0	0		0	0	0	0	0	0	0	0	0	0	0	0	0	0	0	0	0	0	0	0	0	0	0	0	0	0	0	0	0	0	0	0
for	foraging	FBtr0089310	FBgn0000721	4316	GO:0046959,GO:0005737,GO:0008345,GO:0009744,GO:0004692,GO:0004690,GO:0005524,GO:0005886,GO:0004674,GO:0008016,GO:0008045,GO:0006468,GO:0032095,GO:0007631,GO:0007616,GO:0005829,GO:0007614,GO:0030510,GO:0030536		0	0	0	0	0	0	0	0	0	0		0.47	0	0	0	0	0	0	0	0	0	0	0	0.34	0	0	0	0.03	0	0	0	0	1.19	0	0	0	0	0	0	0	0	0	0
for	foraging	FBtr0089312	FBgn0000721	4581	GO:0046959,GO:0005737,GO:0008345,GO:0009744,GO:0004692,GO:0004690,GO:0005524,GO:0005886,GO:0004674,GO:0008016,GO:0008045,GO:0006468,GO:0032095,GO:0007631,GO:0007616,GO:0005829,GO:0007614,GO:0030510,GO:0030536		0	0	0	0	0	0	0	0	0	0		0	0	0	0	0	0	0	0	0	0	0	0	0	0	0	0	0.34	0	0	0	0	0	0	0	0	0	0	0	0	0	0	0
for	foraging	FBtr0100363	FBgn0000721	3886	GO:0046959,GO:0005737,GO:0008345,GO:0009744,GO:0004692,GO:0004690,GO:0005524,GO:0005886,GO:0004674,GO:0008016,GO:0008045,GO:0006468,GO:0032095,GO:0007631,GO:0007616,GO:0005829,GO:0007614,GO:0030510,GO:0030536		0	0	0	0	0	0	0	0	0	0		0	0	0	0	0	0	0	0	0	0	0	0	0	0	0	0	0	0	0	0	0	0	0	0	0	0	0	0	0	0	0	0
for	foraging	FBtr0301399	FBgn0000721	3223	GO:0046959,GO:0005737,GO:0008345,GO:0009744,GO:0004692,GO:0004690,GO:0005524,GO:0005886,GO:0004674,GO:0008016,GO:0008045,GO:0006468,GO:0032095,GO:0007631,GO:0007616,GO:0005829,GO:0007614,GO:0030510,GO:0030536		0	0	0	0	0	0	0	0	0	0		0	0	0	0	0	0	0	0	0	0	0	0	0	0	0	0	0	0	0	1.84	0	0	2.19	0	0	0	0	0	0	0	0	0
for	foraging	FBtr0446099	FBgn0000721	3436	GO:0046959,GO:0005737,GO:0008345,GO:0009744,GO:0004692,GO:0004690,GO:0005524,GO:0005886,GO:0004674,GO:0008016,GO:0008045,GO:0006468,GO:0032095,GO:0007631,GO:0007616,GO:0005829,GO:0007614,GO:0030510,GO:0030536		0	0	0	0	0	0	0	0	0	0		0	0	0	0	0	0	0	0.1	0	0	0	0	0.78	0	0	0	0	0	0	0	0	3.6	0	0	1.3	0	0	0	0	0	0	0
FER	FER tyrosine kinase	FBtr0082051	FBgn0000723	3395	GO:0019898,GO:0007391,GO:0038083,GO:0005524,GO:0007394,GO:0007169,GO:0046664,GO:0005886,GO:0004715,GO:0005543,GO:0016477,GO:0042127,GO:0005102,GO:0004713,GO:0031234,GO:0051017,GO:0045087,GO:0007411,GO:0030154,GO:0006468,GO:0005912		0	0	0	0	0	0	0	0	0	0		0	0	0	0	0	0	0.44	0	0	0	0	0	0	0	0	8	0	0	0	0	0	0	0	0	0	0	0	0	0	0	0	0
FER	FER tyrosine kinase	FBtr0082052	FBgn0000723	4958	GO:0019898,GO:0007391,GO:0038083,GO:0005524,GO:0007394,GO:0007169,GO:0046664,GO:0005886,GO:0004715,GO:0005543,GO:0016477,GO:0042127,GO:0005102,GO:0004713,GO:0031234,GO:0051017,GO:0045087,GO:0007411,GO:0030154,GO:0006468,GO:0005912		3.01	2.62	2.6	9.08	0	3.41	0	0.21	1.02	0.09		1.52	0	0	0	0	0	0.08	0	0	0	1.77	0.46	2.08	19.97	0	0.12	9.7	0.2	0	0	0	2.84	13.37	0	6.03	1.8	0	0	0	0	0	0
FER	FER tyrosine kinase	FBtr0082053	FBgn0000723	2836	GO:0019898,GO:0007391,GO:0038083,GO:0005524,GO:0007394,GO:0007169,GO:0046664,GO:0005886,GO:0004715,GO:0005543,GO:0016477,GO:0042127,GO:0005102,GO:0004713,GO:0031234,GO:0051017,GO:0045087,GO:0007411,GO:0030154,GO:0006468,GO:0005912		0	0	0.32	0	0	0	0.51	0	0	0		0	0	0	1.17	0	0	0	0	0	0	0	0	0.03	0.43	0	0	0.34	0	0	0	0	0	0.63	0	0	0	0	0	0	0	0	0
FER	FER tyrosine kinase	FBtr0082054	FBgn0000723	2303	GO:0019898,GO:0007391,GO:0038083,GO:0005524,GO:0007394,GO:0007169,GO:0046664,GO:0005886,GO:0004715,GO:0005543,GO:0016477,GO:0042127,GO:0005102,GO:0004713,GO:0031234,GO:0051017,GO:0045087,GO:0007411,GO:0030154,GO:0006468,GO:0005912		0	3.97	0.5	0	31.22	0	0	0.69	0	0.95		0.48	24.08	0	0	4.11	0	0	0.04	0.45	0	1.29	0.06	0	2.53	0	10.32	7.67	0	0	0	0	0	9.4	0.51	0	0	0	1.33	0.69	0.61	0	0
FER	FER tyrosine kinase	FBtr0333295	FBgn0000723	3596	GO:0019898,GO:0007391,GO:0038083,GO:0005524,GO:0007394,GO:0007169,GO:0046664,GO:0005886,GO:0004715,GO:0005543,GO:0016477,GO:0042127,GO:0005102,GO:0004713,GO:0031234,GO:0051017,GO:0045087,GO:0007411,GO:0030154,GO:0006468,GO:0005912		0	0	0	0	0	0	0	0	0	0		0	0	0	0	0	0	0	0	0	0	0	0	0	0	0	0	0	0	0	0	0	0	0	0	0	0	0	0	0	0	0	0
FER	FER tyrosine kinase	FBtr0333296	FBgn0000723	3599	GO:0019898,GO:0007391,GO:0038083,GO:0005524,GO:0007394,GO:0007169,GO:0046664,GO:0005886,GO:0004715,GO:0005543,GO:0016477,GO:0042127,GO:0005102,GO:0004713,GO:0031234,GO:0051017,GO:0045087,GO:0007411,GO:0030154,GO:0006468,GO:0005912		0	0	0	0	0	0	0	0	0	0		0.33	0	0	0	0	0	0	0	0	0	0	0	0	0	0	0	0	0	0	0	0	0.09	0	0	0	0	0	0	0	0	0	0
gd	gastrulation-defective	FBtr0332308	FBgn0000808	1914	GO:0008233,GO:0016485,GO:0005576,GO:0008236,GO:0007311,GO:0006508,GO:0008063,GO:0004252,GO:0009950		0	0	0	0	0	0	0	0	0	0		0	0	0	0	0	0	0	0	0	0	0	0	0	0	0	0	0	0	0	0	0	0	0	0	0	0	0	0	0	0	0	0
gd	gastrulation-defective	FBtr0332309	FBgn0000808	1923	GO:0008233,GO:0016485,GO:0005576,GO:0008236,GO:0007311,GO:0006508,GO:0008063,GO:0004252,GO:0009950		0	0	0	0	0	0	0	0	0	0		0	0	0	0	0	0	0	0	0	0	0	0	0	0	0	0	0	0	0	0	0	0	0	0	0	0	0	0	0	0	0	0
gd	gastrulation-defective	FBtr0332310	FBgn0000808	1932	GO:0008233,GO:0016485,GO:0005576,GO:0008236,GO:0007311,GO:0006508,GO:0008063,GO:0004252,GO:0009950		0	0	0	0	0	0	0	0	0	0		0	0	0	0	0	0	0	0	0	0	0	0	0	0	0	0	0	0	0	0	0	0	0	0	0	0	0	0	0	0	0	0
gd	gastrulation-defective	FBtr0347416	FBgn0000808	2234	GO:0008233,GO:0016485,GO:0005576,GO:0008236,GO:0007311,GO:0006508,GO:0008063,GO:0004252,GO:0009950		0	0	0	0	0	0	0	0	0	0		0	0	0	0	0	0	0	0	0	0	0	0	0	0	0	0	0	0	0	0	0	0	0	0	0	0	0	0	0	0	0	0
fs(1)K10	female sterile (1) K10	FBtr0070396	FBgn0000810	3052	GO:0019094,GO:0009953,GO:0008104,GO:0003677,GO:0048477,GO:0008298,GO:0017148,GO:0005634,GO:0030707		23.46	29.08	39.59	22.91	0.03	0.2	18.37	26.79	9.62	6.9		5.84	7.24	24.06	0.43	9.83	3.7	6.16	7.62	2.27	23.16	17.43	12.17	2.08	7.97	0.04	0.93	24.82	7.61	3.18	5.69	10.92	17.95	10.59	23.3	11.82	77.63	0	2.27	1.51	2.23	0.12	1.57
png	pan gu	FBtr0070234	FBgn0000826	1114	GO:0007343,GO:0045977,GO:0005524,GO:0004674,GO:0007346,GO:1902554,GO:0006468		0	0	0	0.1	0	0	0	0	0	1.56		0	0	0	0	0	0	0	0	0	0	0	0	0	0	0	0	0	0	0	0	0	0	0	0	0	0	0	0	0	0	0	0
fs(1)Ya	female sterile (1) Young arrest	FBtr0070485	FBgn0000927	2235	GO:0005737,GO:0005652,GO:0006333,GO:0000278,GO:0006997,GO:0006260,GO:0005515,GO:0030261,GO:0005635,GO:0000280,GO:0007344		0	0	0	0	0	0	0	0	0	0		0	0	0	0	0	0	0	0	0	0	0	0	0	0	0	0	0	0	0	0	0	0	0	0	0	0	0	0.61	0	0	0	0
fs(1)Yb	female sterile (1) Yb	FBtr0070484	FBgn0000928	3502	GO:0030713,GO:0048103,GO:0005737,GO:0042078,GO:0010526,GO:0048477,GO:0070725,GO:0007281,GO:0030718		0	0	0	0	0	0	0	0	0	0		0.03	0	0	0	0	0	0.12	0	0	0	0.07	0	0	0	0	0	0	0	0	0	0	0	0	0	0	0	0	0	0	0	0	0
tj	traffic jam	FBtr0301669	FBgn0000964	3492	GO:0008584,GO:0007298,GO:0045944,GO:0003677,GO:0008585,GO:0000981,GO:0046982,GO:0005634,GO:0035262,GO:0010467		0.03	0	0	0	0	0	0.02	0	0	0		1.6	0	0	0	0.02	0	0.02	2.98	0	0	0.23	0	9.03	0	0.05	0	0.38	0	0	0	0	0.7	5.56	0	0	0	0	0	0	0	0	0
tj	traffic jam	FBtr0329891	FBgn0000964	3492	GO:0008584,GO:0007298,GO:0045944,GO:0003677,GO:0008585,GO:0000981,GO:0046982,GO:0005634,GO:0035262,GO:0010467		0.03	0	0	0	0	0	0.02	0	0	0		1.6	0	0	0	0.02	0	0.02	2.98	0	0	0.23	0	9.03	0	0.05	0	0.38	0	0	0	0	0.7	5.56	0	0	0	0	0	0	0	0	0
dup	double parked	FBtr0087387	FBgn0000996	3138	GO:0042023,GO:0005737,GO:0045494,GO:0007304,GO:0030174,GO:0051298,GO:0019730,GO:0000076,GO:0021782,GO:0042065,GO:0006260,GO:0007307,GO:0005657,GO:0000281,GO:0005634,GO:0051276		0.26	0	2.08	0	0	0	1.66	0.83	0	0.31		0.81	0	0	0	0	0	0	0	0	0	0	0	0.16	0	0	0	0	0.34	0	0	0.13	0	0	0	0	0	1.16	0.45	0.1	5.2	0	0
dup	double parked	FBtr0339999	FBgn0000996	2764	GO:0042023,GO:0005737,GO:0045494,GO:0007304,GO:0030174,GO:0051298,GO:0019730,GO:0000076,GO:0021782,GO:0042065,GO:0006260,GO:0007307,GO:0005657,GO:0000281,GO:0005634,GO:0051276		4.02	2.19	0	1.45	0	0	0	2.37	0.15	0.17		0.33	0.59	0.23	0	0.29	0	0.1	0.1	0	0.1	1.55	0	3.24	2.68	0	0.07	1.89	0.66	0	0	0	0	0.03	0.07	0.76	0	0	0	0	0.05	0	5.9
ft	fat	FBtr0077478	FBgn0001075	16852	GO:0046620,GO:0045317,GO:0044331,GO:0005887,GO:0035209,GO:0008285,GO:0016337,GO:0016336,GO:0007157,GO:0007447,GO:0090176,GO:0007156,GO:0035220,GO:0045926,GO:0045570,GO:0035329,GO:0009888,GO:0030178,GO:0035159,GO:0001737,GO:0007164,GO:0045198,GO:0004872,GO:0048105,GO:0016339,GO:0007446,GO:0045571,GO:0005509,GO:0040008,GO:0018149,GO:0005515,GO:0000904,GO:0045296,GO:0007476,GO:0032880,GO:0010629,GO:…		0	0.02	0	0	0	0.01	0	0	0	0.01		0	0.24	0	0	0	0	0	0.47	0	0	0	0	0.29	0	0	0	0	0	0	0.01	0	0	0.02	0	0.01	0	0	0	0	0	0	0
ftz	fushi tarazu	FBtr0081625	FBgn0001077	1774	GO:0035282,GO:0003705,GO:0008354,GO:0001708,GO:0045944,GO:0000122,GO:0007417,GO:0007366,GO:0007350,GO:0001077,GO:0000980,GO:0035289,GO:0006355,GO:0006357,GO:0035290,GO:0007506		0	0	0	0	0	0	0	0	0	0		0	0	0	0	0	0	0	0	0	0	0	0	0	0	0	0	0	0	0	0	0	0	0	0	0	0	0	0	0	0	0	0
ftz-f1	ftz transcription factor 1	FBtr0075086	FBgn0001078	5407	GO:0003707,GO:0007365,GO:0005737,GO:0035626,GO:0045944,GO:0042048,GO:0055088,GO:0016322,GO:0040034,GO:0003677,GO:0035075,GO:0048813,GO:0035073,GO:0008134,GO:0001077,GO:0016319,GO:0003682,GO:0010906,GO:0035074,GO:0007552,GO:0002165,GO:0006355,GO:0046982,GO:0000976,GO:0006357,GO:0008270,GO:0090575,GO:0005634,GO:0007480,GO:0008219,GO:0004879,GO:0009725,GO:0043401		34.45	26.91	33.2	35.92	0	0	0	16.78	56.81	1.04		4.5	0	0	0	32.82	68.3	0	31.26	21.94	0	0	0	0	4.79	0	0	0	57.53	0	21.23	28.15	2.96	41.46	0	34.06	0	0	0	0	0	0	0
ftz-f1	ftz transcription factor 1	FBtr0075087	FBgn0001078	3980	GO:0003707,GO:0007365,GO:0005737,GO:0035626,GO:0045944,GO:0042048,GO:0055088,GO:0016322,GO:0040034,GO:0003677,GO:0035075,GO:0048813,GO:0035073,GO:0008134,GO:0001077,GO:0016319,GO:0003682,GO:0010906,GO:0035074,GO:0007552,GO:0002165,GO:0006355,GO:0046982,GO:0000976,GO:0006357,GO:0008270,GO:0090575,GO:0005634,GO:0007480,GO:0008219,GO:0004879,GO:0009725,GO:0043401		0	0	20.97	0	8.32	86.09	0	0	0	11.37		0	0	0	12.18	0	5.06	22.76	13.8	0	0	0	0	0	0	0	0	0	16.98	0	0	0	0	22.68	0	0	0	0	0	0	0	0	0
ftz-f1	ftz transcription factor 1	FBtr0304627	FBgn0001078	5910	GO:0003707,GO:0007365,GO:0005737,GO:0035626,GO:0045944,GO:0042048,GO:0055088,GO:0016322,GO:0040034,GO:0003677,GO:0035075,GO:0048813,GO:0035073,GO:0008134,GO:0001077,GO:0016319,GO:0003682,GO:0010906,GO:0035074,GO:0007552,GO:0002165,GO:0006355,GO:0046982,GO:0000976,GO:0006357,GO:0008270,GO:0090575,GO:0005634,GO:0007480,GO:0008219,GO:0004879,GO:0009725,GO:0043401		17.98	16.15	20.46	0	0	9.17	30.33	81.45	9.73	16.81		19.94	2.46	153.23	75.19	0	4.25	1.42	15.83	40.37	57.53	35.32	28.36	70.26	76.11	92.7	1.14	27.48	6.38	5.35	0	4.39	12.38	79.35	17.19	38.36	47.13	2.81	2.94	2.55	0	2.61	17.2
ftz-f1	ftz transcription factor 1	FBtr0347045	FBgn0001078	6060	GO:0003707,GO:0007365,GO:0005737,GO:0035626,GO:0045944,GO:0042048,GO:0055088,GO:0016322,GO:0040034,GO:0003677,GO:0035075,GO:0048813,GO:0035073,GO:0008134,GO:0001077,GO:0016319,GO:0003682,GO:0010906,GO:0035074,GO:0007552,GO:0002165,GO:0006355,GO:0046982,GO:0000976,GO:0006357,GO:0008270,GO:0090575,GO:0005634,GO:0007480,GO:0008219,GO:0004879,GO:0009725,GO:0043401		8.5	7.78	8.3	21.26	13.7	0	2.79	21.46	22.7	40.83		1.66	22.9	0	0	23.74	9.99	5.27	0.98	1.2	24.37	3.47	0	5.99	5.92	6.39	96.17	9.09	2.35	0.78	4.37	0	2.11	0.96	0	1.13	0	0	0	0	4.38	0	0
fu	fused	FBtr0074602	FBgn0001079	3251	GO:0016020,GO:0007224,GO:0005524,GO:0007228,GO:0035301,GO:0004674,GO:0043234,GO:0005515,GO:0007367,GO:0007293,GO:0006468,GO:0042993,GO:0030514,GO:0042073,GO:0030162,GO:0031398,GO:0031647		8.66	9.87	6.61	17.88	0.32	0	0.61	4.19	18.31	4.5		2.33	0	0	0	11.77	1.75	0	2.02	0.49	0	0.04	9.16	1.2	16.13	0.08	0.5	4.66	1.53	4.14	11.96	3.16	2.44	0.14	1.3	3.72	0	0	0.2	1.13	0	0	0
fw	furrowed	FBtr0073580	FBgn0001083	4698	GO:0007156,GO:0007476,GO:0042067,GO:0043296,GO:0030246,GO:0035317,GO:0007423,GO:0050821		0	0.09	0	0	0	0	0	0	0	0		0	0	0	0	0	0	0	0	0	0	0	0	0	0	0	0	0	0	0	0	0	0	0	0	0	0	0	0	0	0	0	0
fw	furrowed	FBtr0112806	FBgn0001083	3938	GO:0007156,GO:0007476,GO:0042067,GO:0043296,GO:0030246,GO:0035317,GO:0007423,GO:0050821		0	0	0	0	0	0	0	0	0	0		0	0	0	0	0	0	0	0	0	0	0	0	0	0	0	0	0	0	0	0	0	0	0	0	0	0	0	0	0	0	0	0
fw	furrowed	FBtr0342733	FBgn0001083	4318	GO:0007156,GO:0007476,GO:0042067,GO:0043296,GO:0030246,GO:0035317,GO:0007423,GO:0050821		0	0	0	0	0	0	0	0	0	0		0	0	0	0	0	0	0	0	0	0.16	0	0	0	0	0	0	0	0	0	0	0	0	0	0	0	0	0	0	0	0.15	0	0
fy	fuzzy	FBtr0079712	FBgn0001084	1688	GO:0001737,GO:0007163,GO:0001736		0	0	0	0	0	0	0	0	0	0		0	0	0	0	0	0	0	0	0	0	0	0.17	0	0	0	0	0	0	0	0	0	0	0	0	0	0	0	0	0	0	0	0
fy	fuzzy	FBtr0331992	FBgn0001084	1547	GO:0001737,GO:0007163,GO:0001736		2.15	1.62	0.16	0	0	0.12	0.6	4.13	1.65	5.94		1	0	0	0	0	0	0	0	0	0	0	0	0	0	0	0	4.45	8.93	0	0	0	0	57.77	0	18.83	0	0	0	0.22	0.25	0	0
fz	frizzled	FBtr0075743	FBgn0001085	3817	GO:0001738,GO:0017147,GO:0005887,GO:0042813,GO:0007298,GO:0035567,GO:0007464,GO:0008105,GO:0008356,GO:0007165,GO:0007507,GO:0060070,GO:0007156,GO:0008104,GO:0016055,GO:0048675,GO:0045773,GO:0035159,GO:0001737,GO:0007163,GO:0007164,GO:0035320,GO:0005886,GO:0045198,GO:0005938,GO:0016360,GO:0004888,GO:0005768,GO:0030010,GO:0042067,GO:0032231,GO:0004930,GO:0016021,GO:1902669,GO:0007186,GO:0001745,GO:…		31.45	41.85	25.45	34.57	4.72	43.13	44.24	34.42	16.65	25.17		1.98	0.52	0.26	1.92	1.5	0.35	0.04	0.2	0.02	0.02	3.57	3.13	1.74	36.75	24.25	27.86	7.22	17.31	7.49	12.81	7.68	2.63	13.97	51.23	26	3.93	0	0	0	0	0.85	0.01
fz	frizzled	FBtr0330102	FBgn0001085	3817	GO:0001738,GO:0017147,GO:0005887,GO:0042813,GO:0007298,GO:0035567,GO:0007464,GO:0008105,GO:0008356,GO:0007165,GO:0007507,GO:0060070,GO:0007156,GO:0008104,GO:0016055,GO:0048675,GO:0045773,GO:0035159,GO:0001737,GO:0007163,GO:0007164,GO:0035320,GO:0005886,GO:0045198,GO:0005938,GO:0016360,GO:0004888,GO:0005768,GO:0030010,GO:0042067,GO:0032231,GO:0004930,GO:0016021,GO:1902669,GO:0007186,GO:0001745,GO:…		31.45	41.85	25.45	34.57	4.72	43.13	44.24	34.42	16.65	25.17		1.98	0.52	0.26	1.92	1.5	0.35	0.04	0.2	0.02	0.02	3.57	3.13	1.74	36.75	24.25	27.86	7.22	17.31	7.49	12.81	7.68	2.63	13.97	51.23	26	3.93	0	0	0	0	0.85	0.01
fzy	fizzy	FBtr0080833	FBgn0001086	1996	GO:0097027,GO:0005737,GO:0007144,GO:0006909,GO:0010997,GO:0007096,GO:0000776,GO:0000278,GO:0060547,GO:0030163,GO:0031145,GO:0061630,GO:0005680,GO:0097150,GO:0030162,GO:0030718,GO:0005819,GO:0007147,GO:0005813,GO:1904668		5.87	1.44	1.4	0	0.05	5.21	8.57	11.09	0.42	1.93		0.25	0	0	0	0.14	0	0	0	0.2	1.2	1.3	0	0	0.72	0	0	0	0	0	0	0	0	3.02	0.2	1.09	0	0	1.56	0.32	4.49	4.03	0.04
g	garnet	FBtr0073842	FBgn0001087	3853	GO:0007220,GO:0005770,GO:0008565,GO:0006895,GO:0060967,GO:0005798,GO:0007040,GO:0008055,GO:0046907,GO:0005783,GO:0008057,GO:0030123,GO:0006886,GO:0006727,GO:0006726,GO:0007041,GO:0005795,GO:0006897,GO:0048072,GO:0008340,GO:0006887		10.91	13.87	3.43	5.89	1.61	1.52	10.56	19.51	15.61	67.32		3.57	0	24.25	38.57	25.3	9.68	7.62	0	0	0	0	0	3.72	0	0	0	1.74	30.84	0	2.32	5.47	8.29	0	61.08	19.12	6.86	0	3.31	1.47	5.88	1.12	0
g	garnet	FBtr0331709	FBgn0001087	4147	GO:0007220,GO:0005770,GO:0008565,GO:0006895,GO:0060967,GO:0005798,GO:0007040,GO:0008055,GO:0046907,GO:0005783,GO:0008057,GO:0030123,GO:0006886,GO:0006727,GO:0006726,GO:0007041,GO:0005795,GO:0006897,GO:0048072,GO:0008340,GO:0006887		9.19	9.39	0.45	8.34	0	13.29	0	90.09	0	72.14		1.35	0	0	81.75	3.3	0	3.62	2.71	1.58	2.5	29.15	1.06	18.73	3.71	2.58	28.85	20.52	1.04	0	19.47	0	16.91	16.75	0	21.39	0	1.79	4.09	3.86	2.32	0	0
g	garnet	FBtr0331710	FBgn0001087	3993	GO:0007220,GO:0005770,GO:0008565,GO:0006895,GO:0060967,GO:0005798,GO:0007040,GO:0008055,GO:0046907,GO:0005783,GO:0008057,GO:0030123,GO:0006886,GO:0006727,GO:0006726,GO:0007041,GO:0005795,GO:0006897,GO:0048072,GO:0008340,GO:0006887		5.47	9.78	18.09	0	18.19	0	20.53	40.76	31.99	10.35		9.31	33.67	55.12	0	3.34	14.04	0.43	7.61	35.68	53.78	20.39	33.12	14.18	32.65	33.98	50.9	43.06	12.95	24.76	3.91	4.28	0	7.54	30	0	12.53	1.23	0	0	0	0	4.79
Gal	beta galactosidase	FBtr0079230	FBgn0001089	2345	GO:0042803,GO:0005773,GO:0004565,GO:0006012		0	0	0	0	0	0	0	0	0	0		4.39	0	0	0	0	0	0	0	0	0	0	0	0	0	0	0	0	0	0	0	0	0	0	0	0	0	0	0	0	0	0	0
Gal	beta galactosidase	FBtr0332603	FBgn0001089	2339	GO:0042803,GO:0005773,GO:0004565,GO:0006012		0	0.42	0.05	0.98	0	1.17	0	0.13	0	0		0	0	0	0	0.34	0	8.38	0	0	0.12	0.55	0.12	0.28	0	0	0	0.77	0	0	0	0	0.52	0.06	0.17	0	0	0.13	0	0	0	0	0
bnb	bangles and beads	FBtr0074656	FBgn0001090	2406	GO:0003674,GO:0005575,GO:0042063,GO:0007275		0.17	0.18	0	0.5	0	78.97	2.28	0	0	0.63		240.95	1.4	41.54	4.53	0.27	0	168.75	67.28	166.59	0	3.21	35.35	183.48	2.99	10.34	0	2.59	4.74	2.5	5.83	5.36	108.18	11.64	0	6.33	113.4	0.25	0	0	0	0	7.21
bnb	bangles and beads	FBtr0074657	FBgn0001090	1947	GO:0003674,GO:0005575,GO:0042063,GO:0007275		0	0	0	0	0	0	0	0	0	0		200.72	0	0	0	1.05	0	0	1.22	0	0	0	0	4.45	0	0	0	0	0	0	4.48	3.02	70.12	0	0	0	0	0	0	0	0	0	0
bnb	bangles and beads	FBtr0074658	FBgn0001090	2095	GO:0003674,GO:0005575,GO:0042063,GO:0007275		0	0	5.52	0	0	0.25	0	0	0	0		4.79	0	0	0	0	0	0	2.42	0	0	0	2.05	0	0	0	0	0	0.49	0	0	2.03	5.58	0	0	0	0	0	0	0	0	0	0
bnb	bangles and beads	FBtr0074659	FBgn0001090	1853	GO:0003674,GO:0005575,GO:0042063,GO:0007275		2.1	5.71	101.64	104.7	1.65	0	46.44	2.5	0	0.51		769.1	27.54	24.98	245.03	3.67	0.07	69.59	248.23	171.25	0.46	7.67	283.97	433.41	0	48.55	40.39	9.62	3.69	9.57	13.32	49.07	295.18	121.72	25.8	48.82	106.9	0	0	0.18	0	1.04	3.5
Gapdh1	Glyceraldehyde 3 phosphate dehydrogenase 1	FBtr0088903	FBgn0001091	1480	GO:0006096,GO:0006006,GO:0031430,GO:0055114,GO:0030018,GO:0004365,GO:0007525,GO:0007520,GO:0051287,GO:0050661		0	0.67	0	0	0	0	0	0	0	0		0.82	0	0	0	0	0	0	0	0	0	0	0	0	0	0	0	0	0	0	0	0	0	0	0	0	0	0	0	0	22.97	0	0
Gapdh1	Glyceraldehyde 3 phosphate dehydrogenase 1	FBtr0100479	FBgn0001091	1330	GO:0006096,GO:0006006,GO:0031430,GO:0055114,GO:0030018,GO:0004365,GO:0007525,GO:0007520,GO:0051287,GO:0050661		38.68	26.04	25.76	67.31	32.31	12.15	29.06	47.57	38.89	33.85		110.39	2.71	0.17	164.83	89.17	79.26	82.83	31.99	10.12	35.73	19.59	25.9	29.08	31.72	2.97	62.16	55.46	58.7	93.94	72.5	19.62	120.12	6.3	9.76	30.85	28.85	657.44	628.94	710.73	1829.77	980.03	590.49
Gapdh2	Glyceraldehyde 3 phosphate dehydrogenase 2	FBtr0074112	FBgn0001092	1443	GO:0006096,GO:0006006,GO:0055114,GO:0004365,GO:0051287,GO:0050661		1.45	0	0	0	0	0	0	0	0	0		4.15	0	0	0	0	3.43	0	1.26	0	0	2.23	0	0	13.39	0	0	0	3.57	0	0	0	0	0	0	2.27	0	509.03	310.28	208.96	845.09	263.5	0
Gapdh2	Glyceraldehyde 3 phosphate dehydrogenase 2	FBtr0332618	FBgn0001092	1377	GO:0006096,GO:0006006,GO:0055114,GO:0004365,GO:0051287,GO:0050661		54.56	99.57	81.42	22.94	41.8	140.26	189.81	53.7	72.21	58.92		115.43	56.23	110.44	19.83	93.18	112.03	13.55	68.49	16.98	37.67	112.91	91.07	116.45	81.48	0.31	1.26	63.35	41.07	119.13	86.92	27.03	183.47	161.48	22.25	191.13	8.65	713.16	938.07	1094.19	1525.17	1179.14	765.55
Gdh	Glutamate dehydrogenase	FBtr0089496	FBgn0001098	1835	GO:0005737,GO:0042802,GO:0005759,GO:0006116,GO:0005739,GO:0006536,GO:0004353,GO:0046693,GO:0005829,GO:0004352,GO:0019551		0	19.99	37.98	6.51	0	0	21.41	4.18	0	2.73		1.55	21.82	0	0	0.2	0	0	4.66	0	0	0.64	0	0.23	0.84	0	0	10.48	0	0	0	0.04	2.79	2.08	49.63	18.34	0	0	1.66	19.87	7.98	7.82	0
Gdh	Glutamate dehydrogenase	FBtr0089497	FBgn0001098	2156	GO:0005737,GO:0042802,GO:0005759,GO:0006116,GO:0005739,GO:0006536,GO:0004353,GO:0046693,GO:0005829,GO:0004352,GO:0019551		94.76	51.56	69.59	37.98	5.53	78.26	129.85	58.53	55.32	51.01		29.68	1.27	81.77	15.06	63.72	2.84	23.29	3.23	0	0	83.48	11.97	11.7	57.6	0	0	54.57	31.55	70.1	32.38	77.14	3.89	61.03	0	58.57	2.46	6.69	41.53	24.14	86.54	15.86	0
Gdh	Glutamate dehydrogenase	FBtr0089498	FBgn0001098	2195	GO:0005737,GO:0042802,GO:0005759,GO:0006116,GO:0005739,GO:0006536,GO:0004353,GO:0046693,GO:0005829,GO:0004352,GO:0019551		23.64	16.19	30.48	0.6	0	0	57.11	24.79	21.61	36.48		4.04	0.5	0	0	5.08	0	0	0.68	128.73	0	18.55	0	0.16	2.8	0	0	33.31	23.61	7.29	9.51	0.94	0.24	5.31	29.38	21.32	0	0	12.31	5.34	1.02	0.72	0
Gdh	Glutamate dehydrogenase	FBtr0335205	FBgn0001098	1796	GO:0005737,GO:0042802,GO:0005759,GO:0006116,GO:0005739,GO:0006536,GO:0004353,GO:0046693,GO:0005829,GO:0004352,GO:0019551		0	44.35	55.06	233.72	187.33	231.93	102.77	7.82	0	13.08		18.94	55.3	0	0	28.16	52.77	0	102.1	0	24.54	3.74	103.07	41.78	38.1	10.45	11.24	20.07	0	0	0	81.58	67.04	43.17	0	66.63	36.92	66.18	0.69	20.9	9.77	51.03	125.7
gdl	gonadal	FBtr0091757	FBgn0001099	965			0	1.33	0	0	0	1.5	0	0	0	0		0.38	0	15.2	2.57	1.84	0.5	0.24	0	0.3	93.16	13.64	0	1.26	0	0	4.84	7.36	1.02	0	0.33	3.24	4.89	18.73	0	2.68	0	0	0	0	2.07	0	0.05
gdl	gonadal	FBtr0334082	FBgn0001099	1175			0	0	0	0	0	0	0	0	0	0		0	0	0	0	0	0	0	0	0	0	0	0	0	0	0	0	0	0	0	0	0	0	0	0	0	0	0	0	0	0	0	0
gdl	gonadal	FBtr0346516	FBgn0001099	1022			7.25	10.69	11.85	0.53	0	0	0	2.21	0.11	9.67		5.74	6.45	0	0	0	0	0	0	0	0	0	0.45	25.26	1.26	0	0	0	0	0	0	5.18	7.81	8.47	0	0	0	4.44	8.69	15.28	5.29	15.13	0
Galphai	G protein alpha i subunit	FBtr0076934	FBgn0001104	2067	GO:0031683,GO:0004871,GO:0008356,GO:0045167,GO:0003924,GO:0019991,GO:0003677,GO:0030866,GO:0051294,GO:0005886,GO:0007188,GO:0032291,GO:0045179,GO:0005938,GO:0055059,GO:0005515,GO:0005834,GO:0019722,GO:0060857,GO:0001664,GO:0032880,GO:0005525,GO:0014045,GO:0007186,GO:0007419		0.56	0	0	0	0	0	0	0	0	0		22.97	0	0	0	25.44	0	0.21	0.22	0	0	0	0	17.4	0	0.06	0	6.17	0	0	0	0	25.45	1.32	0.1	0.31	0	0	0	0	0	0	0.22
Gbeta13F	G protein beta-subunit 13F	FBtr0074107	FBgn0001105	1921	GO:0061343,GO:0043519,GO:0045176,GO:0005886,GO:0060027,GO:0055059,GO:0048383,GO:0005834,GO:0010470,GO:0007186,GO:0003674,GO:0003380		0	0	0	4.52	0	0	0	0	0	0		1.07	1.1	0	0	0	0	0	0	0	0.16	0	0.24	2.6	0	0	0	0	0	0	0.14	0	0	0	0	0	0	0	0.62	0	5.23	5.3	1.03
Gbeta13F	G protein beta-subunit 13F	FBtr0074108	FBgn0001105	5087	GO:0061343,GO:0043519,GO:0045176,GO:0005886,GO:0060027,GO:0055059,GO:0048383,GO:0005834,GO:0010470,GO:0007186,GO:0003674,GO:0003380		47.34	54.75	63.06	89.79	33.56	0	78.11	63.49	11.48	112.7		7.56	0	112.73	0	24.9	14.62	30.64	11.45	98.03	35.08	27.21	35.69	24.93	32.55	19.53	96.77	26.12	33.21	4.63	0	14.53	3.59	16.71	8.99	38.04	347.62	31.97	27.63	43.5	29.57	35.93	20.17
Gbeta13F	G protein beta-subunit 13F	FBtr0074110	FBgn0001105	5321	GO:0061343,GO:0043519,GO:0045176,GO:0005886,GO:0060027,GO:0055059,GO:0048383,GO:0005834,GO:0010470,GO:0007186,GO:0003674,GO:0003380		68.13	226.43	220.08	33.91	0	237.37	0	156.7	34.16	55.71		68.26	363.18	330.35	128.17	62.44	45	176.04	264.45	308.96	28.03	411.08	575.47	341.83	154.12	400.87	30.73	163.97	99.18	29.66	118.17	6.68	82.69	229.54	214.96	223.09	30.37	34.34	20.43	52.18	32.15	71.64	13.57
Gbeta13F	G protein beta-subunit 13F	FBtr0074111	FBgn0001105	5080	GO:0061343,GO:0043519,GO:0045176,GO:0005886,GO:0060027,GO:0055059,GO:0048383,GO:0005834,GO:0010470,GO:0007186,GO:0003674,GO:0003380		277.96	175.84	140.8	183.34	100.35	31.65	121.04	106.99	159.48	129.24		85.29	187.49	120.52	0.21	119.51	82.88	33.43	2.5	37.15	460.42	311.4	127.77	239.87	499	225.95	542.51	72.81	18.26	74.52	3.48	117.92	95.71	135.73	0	40.13	25.68	43.69	7.86	3.3	5.94	4.68	246.46
Gbeta13F	G protein beta-subunit 13F	FBtr0331597	FBgn0001105	1850	GO:0061343,GO:0043519,GO:0045176,GO:0005886,GO:0060027,GO:0055059,GO:0048383,GO:0005834,GO:0010470,GO:0007186,GO:0003674,GO:0003380		40.53	40.78	76.38	47.53	54.89	46.28	254.49	45.62	17.8	52.9		32.27	16.77	65.46	0	42.23	36.48	22.46	31.53	20.58	130.56	128.82	38.05	15.69	23.52	2.61	2.43	24.79	11.45	0.63	17.15	43.43	54.98	54.86	8.16	64.22	23.44	73.67	59.91	104.37	287.82	118.46	6.95
Gbeta13F	G protein beta-subunit 13F	FBtr0346794	FBgn0001105	2391	GO:0061343,GO:0043519,GO:0045176,GO:0005886,GO:0060027,GO:0055059,GO:0048383,GO:0005834,GO:0010470,GO:0007186,GO:0003674,GO:0003380		33.05	44.49	53.82	32.7	95.57	95.13	222.02	47.94	7.98	18.77		9.95	53.25	16.69	1095.67	74.96	1.97	25.61	50.31	41.23	71.36	44.76	63.86	23.33	17.8	17.9	13.9	17.36	22.93	17.37	101.89	3.96	13.62	9.76	61.92	40.4	16.6	82.5	99.83	79.1	102.22	43.7	58.66
DCTN1-p150	Dynactin 1, p150 subunit	FBtr0075756	FBgn0001108	4550	GO:0061176,GO:0005737,GO:0051256,GO:0008090,GO:0007349,GO:0048491,GO:0051225,GO:0000776,GO:0019896,GO:0048675,GO:0000278,GO:0048489,GO:0030496,GO:0035011,GO:0034501,GO:0016330,GO:0001709,GO:1904115,GO:0045198,GO:0005818,GO:0051383,GO:0070840,GO:1990049,GO:0051028,GO:0005869,GO:0051299,GO:0061670,GO:0008017,GO:0005828,GO:0006886,GO:0042052,GO:0031616,GO:0001754,GO:0051642,GO:0001751,GO:0005876,GO:…		20.35	29.41	14.32	29.88	7.62	36.8	5.07	22.44	5.76	16.82		10.65	5.62	65.06	10.83	6.21	65.07	1.02	23.32	3.91	4.07	6.16	11.15	4.63	20.5	8.93	23.27	27.41	18.08	1.46	58.07	20.96	13.12	8.62	0	10.77	0.1	5.44	4.22	4.93	2.75	5.23	9.25
Gld	Glucose dehydrogenase	FBtr0081596	FBgn0001112	2899	GO:0006006,GO:0008364,GO:0055114,GO:0050660,GO:0016614,GO:0046693		0	0	0	0	0	0	0	0.05	0.21	0.29		0.31	0	0	0	0.02	2.12	0	0	0	0	0	0.21	3.36	1.25	0	0	0.13	0.32	0.04	0	0	0.1	0.22	0	0	0	0	0	0	0	0	0
Gld	Glucose dehydrogenase	FBtr0472596	FBgn0001112	2899	GO:0006006,GO:0008364,GO:0055114,GO:0050660,GO:0016614,GO:0046693		0	0	0	0	0	0	0	0.05	0.21	0.29		0.31	0	0	0	0.02	2.12	0	0	0	0	0	0.21	3.36	1.25	0	0	0.13	0.32	0.04	0	0	0.1	0.22	0	0	0	0	0	0	0	0	0
Glt	Glutactin	FBtr0079727	FBgn0001114	3373	GO:0042043,GO:0052689,GO:0098542,GO:0005887,GO:0005604,GO:0004872,GO:0016201,GO:0097105,GO:0007158,GO:0097104,GO:0008045,GO:0050804,GO:0045202,GO:0048488,GO:0009986		5.09	0	0	0	0	0	0	0	0	0		0	0.16	0	0	0	0	0	0	0	0	0	0	0	0	0.04	0	0	0	0	0	0	0	0	0	0	0	0	0	0	0	0	0
Glt	Glutactin	FBtr0307091	FBgn0001114	3260	GO:0042043,GO:0052689,GO:0098542,GO:0005887,GO:0005604,GO:0004872,GO:0016201,GO:0097105,GO:0007158,GO:0097104,GO:0008045,GO:0050804,GO:0045202,GO:0048488,GO:0009986		7.33	10.08	9.33	3.96	2.54	0	29.64	1.24	1.76	2.26		1.63	0	0.55	12.14	1.09	6.16	8.91	0.08	0	4.11	1.49	1.53	0.14	3.43	0	43.7	5.52	0	0	0.03	0.16	0.14	0.03	1.47	3.09	7.48	0	0	0	1.97	0	0
gnu	giant nuclei	FBtr0075697	FBgn0001120	923	GO:0007343,GO:0051726,GO:0000278,GO:0003674,GO:0008156,GO:0007346		0.5	0.4	0.15	0.12	0	0	0	1.43	0	0.75		0.15	1.16	0	0	0	0	0	0	1.73	0	1.78	0.17	0	0.18	0	0	39.82	0	0	0	0	0	0.12	0	0.54	0	0	0	0	0	0	0
Galphao	G protein alpha o subunit	FBtr0088264	FBgn0001122	2312	GO:0031683,GO:0004871,GO:0061343,GO:0008356,GO:0007507,GO:0050774,GO:0003924,GO:0019991,GO:0016055,GO:0030866,GO:0001737,GO:0050965,GO:0005886,GO:0007188,GO:0032291,GO:0042595,GO:0050916,GO:0005515,GO:0005834,GO:0019722,GO:0060857,GO:0001664,GO:0005525,GO:0014045,GO:0007186,GO:0045886,GO:0007419		44.56	46.01	33.59	16.14	0	6.17	14.84	60.27	12.62	26.26		28.64	30.79	11.67	3.2	22.13	13.67	1.35	5.76	1.03	4.56	102.96	67.6	31.17	66.64	4.19	23.16	42.79	5.01	0	11.19	12.5	60.98	47.36	70.8	37.53	18.98	8.32	10.34	18.18	8.75	1.85	9.71
Galphao	G protein alpha o subunit	FBtr0088265	FBgn0001122	2367	GO:0031683,GO:0004871,GO:0061343,GO:0008356,GO:0007507,GO:0050774,GO:0003924,GO:0019991,GO:0016055,GO:0030866,GO:0001737,GO:0050965,GO:0005886,GO:0007188,GO:0032291,GO:0042595,GO:0050916,GO:0005515,GO:0005834,GO:0019722,GO:0060857,GO:0001664,GO:0005525,GO:0014045,GO:0007186,GO:0045886,GO:0007419		0	0	0	0	0.99	0	0	0	0.8	0		0	0	0	0	0	0	0	0	0	0	0	0	0	0	0	0	0	0	0	0	0	0	0	0	0	0	0	0	0	0	0	0
Galphao	G protein alpha o subunit	FBtr0088266	FBgn0001122	3462	GO:0031683,GO:0004871,GO:0061343,GO:0008356,GO:0007507,GO:0050774,GO:0003924,GO:0019991,GO:0016055,GO:0030866,GO:0001737,GO:0050965,GO:0005886,GO:0007188,GO:0032291,GO:0042595,GO:0050916,GO:0005515,GO:0005834,GO:0019722,GO:0060857,GO:0001664,GO:0005525,GO:0014045,GO:0007186,GO:0045886,GO:0007419		125.15	130.73	109.05	96.63	1.53	0.94	155.31	360.64	75.22	167.84		85.35	475.85	200.84	920.71	52.3	35.45	138.97	185.49	625.97	251.06	195.17	361.21	522.96	151.7	1039.31	199.56	100.37	160.57	2.83	135.73	35.08	102.47	119.24	458.12	45.29	327.89	5.64	1.43	5.23	3.65	0.4	540.67
Galphao	G protein alpha o subunit	FBtr0088267	FBgn0001122	2239	GO:0031683,GO:0004871,GO:0061343,GO:0008356,GO:0007507,GO:0050774,GO:0003924,GO:0019991,GO:0016055,GO:0030866,GO:0001737,GO:0050965,GO:0005886,GO:0007188,GO:0032291,GO:0042595,GO:0050916,GO:0005515,GO:0005834,GO:0019722,GO:0060857,GO:0001664,GO:0005525,GO:0014045,GO:0007186,GO:0045886,GO:0007419		0	0	1.05	0.78	0	0	0	0	0	1.61		1.12	0	0	0	0	0	0	1.28	0	0	27.17	0	3.26	0	0	0	0	0	0	0	0	0	0	0	2.86	0	0	0	0	0	0	0.56
Galphao	G protein alpha o subunit	FBtr0088268	FBgn0001122	2294	GO:0031683,GO:0004871,GO:0061343,GO:0008356,GO:0007507,GO:0050774,GO:0003924,GO:0019991,GO:0016055,GO:0030866,GO:0001737,GO:0050965,GO:0005886,GO:0007188,GO:0032291,GO:0042595,GO:0050916,GO:0005515,GO:0005834,GO:0019722,GO:0060857,GO:0001664,GO:0005525,GO:0014045,GO:0007186,GO:0045886,GO:0007419		0	0	1.38	0	0	0	0	0	0	0		0	0	0	0	0	0	0	0	0	0	0	0	0	0	0	0	0	0	0.29	0	0	0	0	0	0	0	0	0	0	0	0	0
Galphao	G protein alpha o subunit	FBtr0088269	FBgn0001122	2212	GO:0031683,GO:0004871,GO:0061343,GO:0008356,GO:0007507,GO:0050774,GO:0003924,GO:0019991,GO:0016055,GO:0030866,GO:0001737,GO:0050965,GO:0005886,GO:0007188,GO:0032291,GO:0042595,GO:0050916,GO:0005515,GO:0005834,GO:0019722,GO:0060857,GO:0001664,GO:0005525,GO:0014045,GO:0007186,GO:0045886,GO:0007419		0	0	0	0	0	0	0	0	26.64	0		0	0	0	0	0	0	1.37	3.24	40.47	0	0	0	0	0	0	0	0	0	0	0	0	0	0	0	5.75	0.21	0	0	0	0	0	8.87
Galphao	G protein alpha o subunit	FBtr0088270	FBgn0001122	2322	GO:0031683,GO:0004871,GO:0061343,GO:0008356,GO:0007507,GO:0050774,GO:0003924,GO:0019991,GO:0016055,GO:0030866,GO:0001737,GO:0050965,GO:0005886,GO:0007188,GO:0032291,GO:0042595,GO:0050916,GO:0005515,GO:0005834,GO:0019722,GO:0060857,GO:0001664,GO:0005525,GO:0014045,GO:0007186,GO:0045886,GO:0007419		3.29	0.53	0.59	1.47	0	0	0	0	0	0		1.08	0	0	0	0	0	6.09	3.13	0	0	0	0	0.61	0.83	0.13	0	0	34.16	1.61	0	0.77	0	0.98	0	1.78	0	0	0.44	0	0	0	0
Galphao	G protein alpha o subunit	FBtr0088271	FBgn0001122	2194	GO:0031683,GO:0004871,GO:0061343,GO:0008356,GO:0007507,GO:0050774,GO:0003924,GO:0019991,GO:0016055,GO:0030866,GO:0001737,GO:0050965,GO:0005886,GO:0007188,GO:0032291,GO:0042595,GO:0050916,GO:0005515,GO:0005834,GO:0019722,GO:0060857,GO:0001664,GO:0005525,GO:0014045,GO:0007186,GO:0045886,GO:0007419		5.29	4.64	0	1.48	0	0.44	0	54.18	4.35	4.38		2.13	0.31	0.63	0	1.83	2.74	1.51	0.98	1.82	0	8.41	2.7	0.68	0	0	1.46	1.13	1.29	0	0	6.29	2.59	0.83	2.61	0	0.22	0	0	0	0	0	0.8
Galphao	G protein alpha o subunit	FBtr0088272	FBgn0001122	5457	GO:0031683,GO:0004871,GO:0061343,GO:0008356,GO:0007507,GO:0050774,GO:0003924,GO:0019991,GO:0016055,GO:0030866,GO:0001737,GO:0050965,GO:0005886,GO:0007188,GO:0032291,GO:0042595,GO:0050916,GO:0005515,GO:0005834,GO:0019722,GO:0060857,GO:0001664,GO:0005525,GO:0014045,GO:0007186,GO:0045886,GO:0007419		90.6	115.61	147.78	196.32	253.29	223.2	171.79	228.31	104.54	204.48		110.6	908.28	746.89	304.86	130.54	206.91	265.27	220.76	494.49	645.46	614.34	748.13	303.77	661.13	649.37	463.93	124.16	82.02	103.46	81.09	95.85	125.58	416.33	672.89	269.87	537.81	74.92	37.99	67.46	52.74	58.09	1170.34
Galphao	G protein alpha o subunit	FBtr0333064	FBgn0001122	1785	GO:0031683,GO:0004871,GO:0061343,GO:0008356,GO:0007507,GO:0050774,GO:0003924,GO:0019991,GO:0016055,GO:0030866,GO:0001737,GO:0050965,GO:0005886,GO:0007188,GO:0032291,GO:0042595,GO:0050916,GO:0005515,GO:0005834,GO:0019722,GO:0060857,GO:0001664,GO:0005525,GO:0014045,GO:0007186,GO:0045886,GO:0007419		199.1	242.07	149.29	56.23	238.34	262.41	24.84	172.6	85.32	196.72		87.24	0	633.55	1321.37	182.46	73.12	194.94	146.81	0	0	202.48	325.7	44.63	29.53	24.28	17.14	73.91	68.7	40.08	130.64	30.49	40.57	180.2	70.83	18.69	0	0	0	0	0	0	339.23
Galphas	G protein alpha s subunit	FBtr0072142	FBgn0001123	1637	GO:0007528,GO:0031683,GO:0004871,GO:0005604,GO:0003924,GO:0035220,GO:0007632,GO:0005886,GO:0048148,GO:0022416,GO:0050916,GO:0005834,GO:2000253,GO:0010353,GO:0007476,GO:0001664,GO:0002165,GO:0005525,GO:0007191,GO:0007611,GO:0007186,GO:0007268		71.61	79.9	30.91	44.39	43.38	275.45	127.81	97.63	46.71	45.67		25.68	0.45	56.14	29.34	19.1	56.77	5.84	0.05	34.19	28.21	53.61	15.52	27.65	245.61	47.1	68.26	46.6	41.96	105.12	18.51	39.39	15.69	213.71	3.69	161.12	4.91	42.96	2.05	46.89	30.11	24.84	97.94
Galphas	G protein alpha s subunit	FBtr0072143	FBgn0001123	1859	GO:0007528,GO:0031683,GO:0004871,GO:0005604,GO:0003924,GO:0035220,GO:0007632,GO:0005886,GO:0048148,GO:0022416,GO:0050916,GO:0005834,GO:2000253,GO:0010353,GO:0007476,GO:0001664,GO:0002165,GO:0005525,GO:0007191,GO:0007611,GO:0007186,GO:0007268		0.62	0.72	1.31	0.09	0	0	0	0	0	0.51		0.23	0	0.02	0	0	0	0	0	0	0	2.9	0	0.61	0	0	0	0	1.19	0.1	0	0	9.3	0.69	0	0.34	0	0	23.32	0.71	0.55	0	0
Galphas	G protein alpha s subunit	FBtr0072144	FBgn0001123	1850	GO:0007528,GO:0031683,GO:0004871,GO:0005604,GO:0003924,GO:0035220,GO:0007632,GO:0005886,GO:0048148,GO:0022416,GO:0050916,GO:0005834,GO:2000253,GO:0010353,GO:0007476,GO:0001664,GO:0002165,GO:0005525,GO:0007191,GO:0007611,GO:0007186,GO:0007268		1.05	1.11	0.69	0.35	0	0	0	0	0	1.04		0.34	0	0.86	0	0	18.45	0	0	0	0	3.35	0	1.49	0	0	0	0	1.07	0.44	0	0	4.54	2.05	0	0.56	0	0	1.18	0.28	1.69	0	0
Galphas	G protein alpha s subunit	FBtr0301411	FBgn0001123	1646	GO:0007528,GO:0031683,GO:0004871,GO:0005604,GO:0003924,GO:0035220,GO:0007632,GO:0005886,GO:0048148,GO:0022416,GO:0050916,GO:0005834,GO:2000253,GO:0010353,GO:0007476,GO:0001664,GO:0002165,GO:0005525,GO:0007191,GO:0007611,GO:0007186,GO:0007268		32.88	49.71	52.95	17.51	0	24.08	2.99	11.85	1.21	28.2		16.46	14.09	1.37	0	2.63	0	0	25.44	2.61	0	44.37	58.74	10.27	51.99	20.46	0	10.18	17.28	6.33	6.41	2.01	34.64	66.89	0	92.07	0	9.06	17.22	17.9	37.64	22.31	9.46
Galphas	G protein alpha s subunit	FBtr0343279	FBgn0001123	1826	GO:0007528,GO:0031683,GO:0004871,GO:0005604,GO:0003924,GO:0035220,GO:0007632,GO:0005886,GO:0048148,GO:0022416,GO:0050916,GO:0005834,GO:2000253,GO:0010353,GO:0007476,GO:0001664,GO:0002165,GO:0005525,GO:0007191,GO:0007611,GO:0007186,GO:0007268		14.48	19.49	3.93	0	4.61	3.03	0	7.85	0.94	2.31		2.27	0	0	0	0.62	0	1.54	0	0	0	0.64	0	0.34	2.62	0	0	0.51	0	0	0.71	12.38	3.15	0.44	0	3.04	0	0	2.44	0	1.22	0	0
Got1	Glutamate oxaloacetate transaminase 1	FBtr0087231	FBgn0001124	1682	GO:0005759,GO:0006537,GO:0006532,GO:0030170,GO:0005777,GO:0005829,GO:0006531,GO:0004069		0	5.14	0	10.34	0	40.22	15.67	2.89	1.11	4.68		0	0	0.13	0	7.92	0	0.51	0	0	3.54	0	0	0	0	0	0	0	0	0	0	0	0	22.64	0	0	0	15.98	0	6.55	0	3.94	1.12
Got1	Glutamate oxaloacetate transaminase 1	FBtr0087232	FBgn0001124	1683	GO:0005759,GO:0006537,GO:0006532,GO:0030170,GO:0005777,GO:0005829,GO:0006531,GO:0004069		3.73	0.08	1.83	0.33	3.85	0.62	0.27	0.08	0.01	0.13		57.38	0	0	0	0.24	0	0.01	1.79	0	0.03	11.59	24.73	27.3	20.43	1.05	0	110.4	22.4	1.06	16.54	17.86	72.38	0.5	0	18.64	0	0.22	0	0.14	15.59	0.04	0.01
Got2	Glutamate oxaloacetate transaminase 2	FBtr0077867	FBgn0001125	1575	GO:0005759,GO:0006537,GO:0005739,GO:0030170,GO:0045213,GO:0007416,GO:0006531,GO:0004069,GO:0006533		6.32	0	13.3	0	0	0	0	14.86	7.54	0		29.15	0	0	0	0	0	0	0	0	0	0	0	0	0	0	0	0	0	0	0	0	0	0	0	0.64	0	0	4.13	0	18.55	0	0
Got2	Glutamate oxaloacetate transaminase 2	FBtr0077868	FBgn0001125	1560	GO:0005759,GO:0006537,GO:0005739,GO:0030170,GO:0045213,GO:0007416,GO:0006531,GO:0004069,GO:0006533		0	13.89	0	0.07	23.06	1.73	0	0	0	6.21		0.36	1.09	185.7	0.3	16.76	16.21	0	0	1.38	0	3.87	0.09	5.13	5.04	0	0	2.2	25.71	1.49	0.91	0	4.38	0	0	0	0	12.6	0	5.81	0	27.59	9.77
Gpdh	Glycerol 3 phosphate dehydrogenase	FBtr0079146	FBgn0001128	1651	GO:0031430,GO:0055114,GO:0005975,GO:0042803,GO:0009331,GO:0030018,GO:0046168,GO:0006067,GO:0055093,GO:0007629,GO:0006641,GO:0051287,GO:0004367		4.26	0	4.49	0	0	0	0	7.77	0	0		1.13	0	0	0	0	0	0	0	0	0	0	0	0	0	6.91	0	0	0	0	0	0	0	0	0	0	0	0	0	0	0	0	0
Gpdh	Glycerol 3 phosphate dehydrogenase	FBtr0079147	FBgn0001128	1631	GO:0031430,GO:0055114,GO:0005975,GO:0042803,GO:0009331,GO:0030018,GO:0046168,GO:0006067,GO:0055093,GO:0007629,GO:0006641,GO:0051287,GO:0004367		42.28	46.47	29.69	30.86	26.66	123.77	72.14	70.65	110.47	71.68		56.71	23.93	31.29	0	18.38	26.67	11.31	13.28	4.5	1.07	52.06	27.53	35.11	138.05	59.96	1.46	18.79	103.1	7.25	101.96	35.34	7.64	93.35	0	77.08	8.5	108.17	59.41	129.11	177.42	76.76	20.09
Gpdh	Glycerol 3 phosphate dehydrogenase	FBtr0079148	FBgn0001128	1734	GO:0031430,GO:0055114,GO:0005975,GO:0042803,GO:0009331,GO:0030018,GO:0046168,GO:0006067,GO:0055093,GO:0007629,GO:0006641,GO:0051287,GO:0004367		37.32	35.79	49.01	83.64	15.71	94.04	7.5	109.49	40.87	58.83		9.65	3.75	39.72	62.9	23.29	10.35	1.15	18.32	1.06	4.12	45.71	5.99	49.05	12.66	143.87	36.53	98.81	36.03	14.12	11.72	12.33	13.83	39.91	3.25	36.18	9.93	4.46	0.6	1.03	0	0	0.44
Gpdh	Glycerol 3 phosphate dehydrogenase	FBtr0333228	FBgn0001128	1801	GO:0031430,GO:0055114,GO:0005975,GO:0042803,GO:0009331,GO:0030018,GO:0046168,GO:0006067,GO:0055093,GO:0007629,GO:0006641,GO:0051287,GO:0004367		0	0	0	0	0	0	0	0	0	0		0	0	0	0	0	0	0	0	0	0	0	0	0	0	0	0	25.31	0	0	2.82	0	19.64	0	0	0	0	0	0	0	2.84	1.83	0
Gpdh	Glycerol 3 phosphate dehydrogenase	FBtr0333229	FBgn0001128	2503	GO:0031430,GO:0055114,GO:0005975,GO:0042803,GO:0009331,GO:0030018,GO:0046168,GO:0006067,GO:0055093,GO:0007629,GO:0006641,GO:0051287,GO:0004367		11.5	12.44	9.71	9.49	5.41	30.45	16.19	17.44	8.73	14.81		2.68	2.74	5.25	2.74	3.98	0.34	0	0.77	0	4.62	3.4	10.69	5.35	13.41	0.17	42.36	33.5	6.2	3.01	2.16	1.1	2.87	16.88	23.35	14.4	16.46	2.8	1.31	5.57	4.21	4.73	0.36
Gpdh	Glycerol 3 phosphate dehydrogenase	FBtr0333230	FBgn0001128	2078	GO:0031430,GO:0055114,GO:0005975,GO:0042803,GO:0009331,GO:0030018,GO:0046168,GO:0006067,GO:0055093,GO:0007629,GO:0006641,GO:0051287,GO:0004367		0.7	1.26	2.21	3.58	14.95	12.82	46.87	20.46	1.91	3.26		3.71	8.3	0	2.4	2.93	0.78	0	0.74	0.54	0	8.52	43.54	2.14	2.77	1.4	0	12.95	2.15	0.26	3.04	4.59	5.22	9.44	0.11	3.12	1.48	1.77	8.01	7.96	15.22	5.87	8.85
grau	grauzone	FBtr0071548	FBgn0001133	1894	GO:0007343,GO:0007349,GO:0045944,GO:0007279,GO:0007143,GO:0000987,GO:0045143,GO:0006357,GO:0008270,GO:0005634,GO:0006366		7.49	1.82	7.52	0	2.55	0	0	15.53	1.38	8.12		1.19	0	0	0	9.96	4.63	0	0	0	0	21.26	0	0.77	4.36	0	0.11	2.95	6.67	0	9.16	1.97	0.52	12.78	5.35	1.32	0	0.81	4.62	8.75	10.51	1.22	17.66
Grd	Glycine receptor	FBtr0075139	FBgn0001134	4071	GO:0015276,GO:0004890,GO:0005886,GO:0022851,GO:0016021,GO:0016933,GO:0006811,GO:0005261		0.2	0	0	0	0	4.88	3.18	0	0.02	0		1.51	0	0	0	0.06	0	0	0.45	0	0	0	0	0.52	0	0.03	0.2	0	0	0	0	0	0	0	0	0	0	0	0	0	0	0	0
grk	gurken	FBtr0079708	FBgn0001137	1718	GO:0016325,GO:0030714,GO:0007298,GO:0008314,GO:0008069,GO:0001708,GO:0005576,GO:0005886,GO:0008070,GO:0001709,GO:0030381,GO:0007309,GO:0005783,GO:0046843,GO:0090110,GO:0005515,GO:0007173,GO:0000578,GO:0009952,GO:0007310,GO:0005154,GO:0007314		0.49	0.88	0.14	0.44	3.99	1.98	0.14	4.96	0.43	9.38		0.88	0.73	20.33	0	0.08	0	0	0.22	0.42	0.19	3.22	0.81	1.18	7.26	0.32	0	9.67	0	0	0.27	0	0	5.85	0	16.8	0	0	0.41	0.19	0	0.45	2.42
grn	grain	FBtr0081808	FBgn0001138	3451	GO:0001085,GO:0000977,GO:0009888,GO:0043565,GO:0009887,GO:0000981,GO:0003682,GO:0008045,GO:0001228,GO:0006355,GO:0005667,GO:0045582,GO:0008270,GO:0005634		0	0	0	0	0	0	0.06	0	0	0		0.99	0	2.77	0	0	0	0	0.53	1.33	0.36	0.29	0	8.32	1.15	0.07	0	0	0	0	0	0	0	1.46	0	0.36	0	0	0	0	0	0.21	0
grn	grain	FBtr0300040	FBgn0001138	4090	GO:0001085,GO:0000977,GO:0009888,GO:0043565,GO:0009887,GO:0000981,GO:0003682,GO:0008045,GO:0001228,GO:0006355,GO:0005667,GO:0045582,GO:0008270,GO:0005634		0	0	0	0	0	0	0	0	0	0		0.09	0	0	0	0	0	0	0	0	0	0	0	0	0	0	0	0	0	0	0	0	0	0	0	0	0	0	0	0	0	0	0
grn	grain	FBtr0330188	FBgn0001138	4090	GO:0001085,GO:0000977,GO:0009888,GO:0043565,GO:0009887,GO:0000981,GO:0003682,GO:0008045,GO:0001228,GO:0006355,GO:0005667,GO:0045582,GO:0008270,GO:0005634		0	0	0	0	0	0	0	0	0	0		0.09	0	0	0	0	0	0	0	0	0	0	0	0	0	0	0	0	0	0	0	0	0	0	0	0	0	0	0	0	0	0	0
gro	groucho	FBtr0084962	FBgn0001139	2969	GO:0007541,GO:0090090,GO:0070491,GO:0001106,GO:0007399,GO:0003677,GO:0030178,GO:0045879,GO:0000122,GO:0048813,GO:0043234,GO:0008134,GO:0005515,GO:0071837,GO:0045892,GO:0046331,GO:0003714,GO:0006355,GO:0071906,GO:0005634		0	0	0	0	0	0	0	0	0	0		0	0	0	0	0	0	0	0	0	0	0	0	0	0	0	0	0	0	0	0	0	0	0	0	0	0	0.18	0	0.73	0.84	0	0
gro	groucho	FBtr0084963	FBgn0001139	2988	GO:0007541,GO:0090090,GO:0070491,GO:0001106,GO:0007399,GO:0003677,GO:0030178,GO:0045879,GO:0000122,GO:0048813,GO:0043234,GO:0008134,GO:0005515,GO:0071837,GO:0045892,GO:0046331,GO:0003714,GO:0006355,GO:0071906,GO:0005634		24.76	16.11	13.03	6.27	1.28	21.62	3.15	20.43	8.78	4.45		4.01	0	0	0	6.16	2.2	0	1.49	0	0	8.39	18.4	0.52	24.32	0.77	7.2	0.15	5.83	0.37	21.91	25.07	3.05	12.34	3.82	2.77	1.05	5.46	9.65	4.87	4.51	0.68	26.53
gro	groucho	FBtr0084964	FBgn0001139	2908	GO:0007541,GO:0090090,GO:0070491,GO:0001106,GO:0007399,GO:0003677,GO:0030178,GO:0045879,GO:0000122,GO:0048813,GO:0043234,GO:0008134,GO:0005515,GO:0071837,GO:0045892,GO:0046331,GO:0003714,GO:0006355,GO:0071906,GO:0005634		0	0	0	0	0	0	0	0	0	0		0	0	0	0	0	0	0	0	0	0	0	0	0	0	0	4.82	0	0.02	0	0	0	0	0	0	0	0	0	0	0	0	0	0
gro	groucho	FBtr0084965	FBgn0001139	2887	GO:0007541,GO:0090090,GO:0070491,GO:0001106,GO:0007399,GO:0003677,GO:0030178,GO:0045879,GO:0000122,GO:0048813,GO:0043234,GO:0008134,GO:0005515,GO:0071837,GO:0045892,GO:0046331,GO:0003714,GO:0006355,GO:0071906,GO:0005634		0.24	0.47	0.68	2.64	0	0.3	0	0.53	0.49	5.62		0.37	0	0	0.2	26.27	33.03	0.35	0.49	0	0	1.81	0	0.2	0	0	0	0.05	0.47	0	0	1.99	0	0.11	0	0.09	0.14	0.29	0	0	0	0	0
gro	groucho	FBtr0084966	FBgn0001139	3002	GO:0007541,GO:0090090,GO:0070491,GO:0001106,GO:0007399,GO:0003677,GO:0030178,GO:0045879,GO:0000122,GO:0048813,GO:0043234,GO:0008134,GO:0005515,GO:0071837,GO:0045892,GO:0046331,GO:0003714,GO:0006355,GO:0071906,GO:0005634		0	0	0	0	0	0	0	0	0	0		0	0	0	0	0	0	0	0	0	0	0	0	0	0	0	0	0	0	0	0	0	0	0.13	0	0	0	0	0	0	0	0	0
gro	groucho	FBtr0302951	FBgn0001139	2975	GO:0007541,GO:0090090,GO:0070491,GO:0001106,GO:0007399,GO:0003677,GO:0030178,GO:0045879,GO:0000122,GO:0048813,GO:0043234,GO:0008134,GO:0005515,GO:0071837,GO:0045892,GO:0046331,GO:0003714,GO:0006355,GO:0071906,GO:0005634		7.23	18.48	13.26	10.99	0	0.18	0	25.12	4.01	29.46		5.37	0	0	0	2.83	5.02	0	0	0	0	5.56	1.67	4	2.15	0	0	1.63	62.93	1.15	3.7	6.31	0.35	21.2	0	12.31	28.96	1.84	0.83	0	1.19	1.41	0
gro	groucho	FBtr0302952	FBgn0001139	2996	GO:0007541,GO:0090090,GO:0070491,GO:0001106,GO:0007399,GO:0003677,GO:0030178,GO:0045879,GO:0000122,GO:0048813,GO:0043234,GO:0008134,GO:0005515,GO:0071837,GO:0045892,GO:0046331,GO:0003714,GO:0006355,GO:0071906,GO:0005634		0	0	0	0	0	0	0	0	0	0		0	0	0	0	0	0	0	0	0	0	0	0	0	0	0	0	0	0	0	0	0	0	0	0	0	0	0	0	0	0	0	0
gro	groucho	FBtr0305047	FBgn0001139	3951	GO:0007541,GO:0090090,GO:0070491,GO:0001106,GO:0007399,GO:0003677,GO:0030178,GO:0045879,GO:0000122,GO:0048813,GO:0043234,GO:0008134,GO:0005515,GO:0071837,GO:0045892,GO:0046331,GO:0003714,GO:0006355,GO:0071906,GO:0005634		0	0	0	0	0	0	0	0	0	0		0	0	0	0	0	0	0	0	0	0	0	0	0	0	0	0	0	0	0	0	0	0	0	0	0	0	0	0	0	0	0	0
gro	groucho	FBtr0337057	FBgn0001139	3918	GO:0007541,GO:0090090,GO:0070491,GO:0001106,GO:0007399,GO:0003677,GO:0030178,GO:0045879,GO:0000122,GO:0048813,GO:0043234,GO:0008134,GO:0005515,GO:0071837,GO:0045892,GO:0046331,GO:0003714,GO:0006355,GO:0071906,GO:0005634		2.4	2.83	2.61	45.9	14.81	0	28.14	0	0	5.29		0.91	110.51	0	70.26	4.91	0	0	11.87	0.1	0	2.94	57.66	6.38	57.1	160.59	63.96	2.03	0	1.22	0	0	0	42.2	0	14.82	124.21	1.66	0.3	0.6	0.65	6.44	19.63
gro	groucho	FBtr0339900	FBgn0001139	3975	GO:0007541,GO:0090090,GO:0070491,GO:0001106,GO:0007399,GO:0003677,GO:0030178,GO:0045879,GO:0000122,GO:0048813,GO:0043234,GO:0008134,GO:0005515,GO:0071837,GO:0045892,GO:0046331,GO:0003714,GO:0006355,GO:0071906,GO:0005634		16.19	22.49	24.56	0	0	8.37	0	24.03	3.64	9.28		8.29	2.25	105.63	0	10.56	12.88	30.23	25.82	54.49	51.9	42.23	33.93	30.47	71.65	5.54	0	33.3	35.61	32.85	3.91	8.27	34.39	0.64	5.21	14.31	0	0	0	0	0.91	0	0
Gs1	Glutamine synthetase 1	FBtr0078114	FBgn0001142	2176	GO:0006909,GO:0007005,GO:0005739,GO:0004356,GO:0006541,GO:0006542		18.87	21.36	11.61	14.7	0.95	3.59	36.41	25.1	24.8	35.51		18.76	11.11	117.81	0	7.52	9.6	6.87	6.03	3.31	5.15	39.53	74.83	12.04	23.34	0	5.14	39.07	8.85	3.92	33.63	29.78	2.61	30.15	2.35	42.62	11.36	53.62	50.01	57.04	73.13	73.56	77.44
Gs1	Glutamine synthetase 1	FBtr0078115	FBgn0001142	2396	GO:0006909,GO:0007005,GO:0005739,GO:0004356,GO:0006541,GO:0006542		0.24	2.29	4.57	0	0	1.48	5.78	12.47	0	13.04		0.42	0	4.29	0	4.3	2.1	0	0.61	0	0	120.24	2.31	0	12.47	0.2	0	3.66	3.83	0	0.34	1.66	1.12	2.82	0	0.89	0.43	0	12.38	1.1	3.93	1.28	0
Gs1	Glutamine synthetase 1	FBtr0300568	FBgn0001142	1699	GO:0006909,GO:0007005,GO:0005739,GO:0004356,GO:0006541,GO:0006542		4.31	0	11.43	0	164.85	70.88	0	17.51	0	0.12		0	0	37.85	0.41	31.05	61.89	0	0	0	0	0	0	0	0	2.51	0	0	16.32	14.97	18.5	24.57	15.8	9.68	0	18.03	14.1	0	26.56	8.06	90.67	0	0
Gs2	Glutamine synthetase 2	FBtr0073494	FBgn0001145	1906	GO:0005737,GO:0004356,GO:0045213,GO:0007416,GO:0006538,GO:0006542		0	0	0	0	0	0	0	0	0	0		0	0	0	0	0	0	0	0	0	0	0	0	0	0	0	0	0	0	0	0	0	0	69.03	0	0	0	0	0	0	0	0	0
Gs2	Glutamine synthetase 2	FBtr0073495	FBgn0001145	1619	GO:0005737,GO:0004356,GO:0045213,GO:0007416,GO:0006538,GO:0006542		0	0	3.59	0	0	0	0.36	3.33	0	4.18		564.25	0	0	0	2.92	0.71	0	5.49	47.85	0.71	2.29	19.6	105.94	0	27.27	0	36.23	0.89	1.59	3.02	12.19	840.1	209.81	19.68	38.49	0	0	0	9.04	1	5.81	0
Gs2	Glutamine synthetase 2	FBtr0073496	FBgn0001145	1812	GO:0005737,GO:0004356,GO:0045213,GO:0007416,GO:0006538,GO:0006542		4.08	0.31	2.29	0	0	0	0	1.44	0.82	2.33		556.51	29.57	1.28	0	3.89	0	0	13.19	0.64	0	6.48	3.81	792.01	74.01	2.16	0	16.8	0	0	3.34	0	806.87	29.75	0	0	0.13	0	0	0.92	1.54	3.48	0.4
Gs2	Glutamine synthetase 2	FBtr0343561	FBgn0001145	1918	GO:0005737,GO:0004356,GO:0045213,GO:0007416,GO:0006538,GO:0006542		0	0	0	0	0	0	0	0	0	0		0	0	0	0	0	0	0	0	0	0	0	0	0	0	0	0	0	0	0	0	0	0	0	0	9.97	0	0	0	0	0	0	0
Gs2	Glutamine synthetase 2	FBtr0343562	FBgn0001145	1829	GO:0005737,GO:0004356,GO:0045213,GO:0007416,GO:0006538,GO:0006542		0	0	0	0	0	0	0	0	0	0		20.27	0	0	26.06	0	0	0	0	0	0	0	0	0	0	0	0	30.37	0	0	0	0.24	33.92	4.59	0	9.43	0	0	0	0	0	0	0
Gs2	Glutamine synthetase 2	FBtr0343563	FBgn0001145	1990	GO:0005737,GO:0004356,GO:0045213,GO:0007416,GO:0006538,GO:0006542		0	0	0	0	0	0	0	0	0	0		10.96	0	0	37.09	0	0	0	0	0	0	0.66	0	3.71	0	2.02	0	0.57	0	0	0	1.38	12.91	0.53	0	1.22	0	0	0	0	0	0	0
gsb-n	gooseberry-neuro	FBtr0072461	FBgn0001147	2237	GO:0022008,GO:0000977,GO:0003677,GO:0007367,GO:0006355,GO:0005634		0.32	0.15	0.43	0	0	0	0	4.02	5.2	0.61		0.85	5.71	0	0	0.66	0	0	0.28	6.02	0	1.78	0.36	0.41	15.57	2.94	0	1.74	0.06	0	0.56	0	0.56	16.11	0	1.72	0	0	0.15	0	0	0	6
gsb	gooseberry	FBtr0072444	FBgn0001148	1649	GO:0005737,GO:0022008,GO:0000977,GO:0010906,GO:0007367,GO:0060025,GO:0006355,GO:0005634,GO:0007419,GO:0007435,GO:0007268		0.26	0	0	0.06	0	2.23	0	0.09	0	0		0.04	0.09	0	0	0.33	0	0	0.83	0	0	7.21	0	0	12.77	0	0	0	0	0	0	0	0.06	0	0	0	0	0	0	0	0	0	8.02
GstD1	Glutathione S transferase D1	FBtr0082607	FBgn0001149	825	GO:0005737,GO:0006749,GO:0018833,GO:0004364		188.48	173.65	192.87	24.42	1.75	73.6	151.26	17.68	19.65	13.54		165.69	0	0	1.55	0.37	5.99	0	0	0	0.19	0.19	1.57	80.27	0.41	0	0	57.97	5.29	0	0.16	0	287.84	20.9	0	25.09	0	0	0	0	0	5.79	0.24
GstD1	Glutathione S transferase D1	FBtr0100410	FBgn0001149	843	GO:0005737,GO:0006749,GO:0018833,GO:0004364		0	19.47	0	0	0	0	0	4.06	0	0		0	0	0	0	0	0	0	0	0	0	0	0	0	0	0	0	0	0	0	0	0	0	2.36	0	0	0	0	14.95	0	0	0	0
gt	giant	FBtr0070460	FBgn0001150	1780	GO:0035271,GO:0003705,GO:0007381,GO:0007362,GO:0007354,GO:0000122,GO:0001077,GO:0010906,GO:0000980,GO:0046982,GO:0008293,GO:0006909,GO:0000977,GO:0010468,GO:0043565,GO:0042803,GO:0007431,GO:0040015,GO:0007411,GO:0003700,GO:0008361,GO:0035289,GO:0005634,GO:0044324		3.39	0.44	0.13	0.17	0	0	0	3.1	0	0.21		2.02	0.86	0.12	0.16	0.84	0.07	6.37	1.28	22.53	0	2.46	6	0.5	17.19	0.45	13.53	0.12	0	0.43	3.48	6.74	10.73	0.76	0	12.41	0	5.06	7.54	3.32	8.84	11.38	0
h	hairy	FBtr0076569	FBgn0001168	2139	GO:0000978,GO:0070888,GO:0007399,GO:0003677,GO:0035239,GO:0007460,GO:0000122,GO:0031323,GO:0000902,GO:0001078,GO:0007366,GO:0008134,GO:0046983,GO:0007431,GO:0005515,GO:0045892,GO:0001666,GO:0035289,GO:0005634,GO:0035290,GO:0061024,GO:0007424,GO:0007435		0.88	0.05	0.06	0	0	0	0	0	0	0		0	0	0	0.11	0	0.7	21.74	0	0	0	0.54	0	0	0	0	0	0	0.78	0	0.05	0	0	0.74	0	0	0	0	0	0	0	0	0
h	hairy	FBtr0100153	FBgn0001168	2335	GO:0000978,GO:0070888,GO:0007399,GO:0003677,GO:0035239,GO:0007460,GO:0000122,GO:0031323,GO:0000902,GO:0001078,GO:0007366,GO:0008134,GO:0046983,GO:0007431,GO:0005515,GO:0045892,GO:0001666,GO:0035289,GO:0005634,GO:0035290,GO:0061024,GO:0007424,GO:0007435		0	0	0	0	0	0	0	0	0	0		10	0	0	0	0	0	14.81	0.11	1.4	13.77	0	0	8.11	0.18	0.06	0	269.18	0	0	0	0	1.23	0	0	0	0	0	0	0	0	0	0
H	Hairless	FBtr0083914	FBgn0001169	5919	GO:0010941,GO:0048190,GO:0007219,GO:0008586,GO:0036335,GO:0044719,GO:0008052,GO:0035019,GO:0016360,GO:0005515,GO:0046331,GO:0003714,GO:0005634,GO:0008587,GO:0045746		0.77	0	2.3	0	2.89	0	5	3.38	7.87	0		1.6	18.28	28.73	10.82	0	0	0	1.66	0	0	0	19.54	0.69	14.44	0	0	0	0	0	0	4.06	0	1.61	1.13	0	20.42	0	0	0.17	0.77	0.41	7.19
H	Hairless	FBtr0083915	FBgn0001169	3884	GO:0010941,GO:0048190,GO:0007219,GO:0008586,GO:0036335,GO:0044719,GO:0008052,GO:0035019,GO:0016360,GO:0005515,GO:0046331,GO:0003714,GO:0005634,GO:0008587,GO:0045746		0.74	5.12	0.12	1.48	14.52	0	2.52	0.46	0	0		0.06	0	0	30.53	1.99	0	0	0	0	0	0	0	1.01	0	0	0	0	7.66	0	7.26	27.66	0	0	0	0	22.81	0	0	0	0	0	1.02
H	Hairless	FBtr0083916	FBgn0001169	4255	GO:0010941,GO:0048190,GO:0007219,GO:0008586,GO:0036335,GO:0044719,GO:0008052,GO:0035019,GO:0016360,GO:0005515,GO:0046331,GO:0003714,GO:0005634,GO:0008587,GO:0045746		12.84	17.17	16.91	47.1	0	2.02	2.32	15.66	14.16	13.54		2.77	0	0	0	14.07	46.01	32.01	3.53	0	0	14	0	0	8.94	54.66	0	25.58	9.36	0	3.66	0.37	5.87	33.11	0	8.29	0	0.34	0.45	1.1	0	0	0
H	Hairless	FBtr0083917	FBgn0001169	6004	GO:0010941,GO:0048190,GO:0007219,GO:0008586,GO:0036335,GO:0044719,GO:0008052,GO:0035019,GO:0016360,GO:0005515,GO:0046331,GO:0003714,GO:0005634,GO:0008587,GO:0045746		16.11	21.88	17.74	11.84	0	37.99	3.7	7.65	2.13	10.78		3.25	2.78	0	0	5.19	2.1	1.47	3.3	43.29	8.4	23.74	12.62	4.19	0.68	64.46	20.19	6.75	1.53	5.74	2.28	0	11.77	23.71	15.06	19.87	4.78	0	0	0	0	0	0
H2.0	Homeodomain protein 2.0	FBtr0079227	FBgn0001170	1662	GO:0043565,GO:0006355		0.13	0	0	0	0	0	0	0	0	0		0	0	0	0	0	0	0	0	0	0	0	0	0	0	0	0	0.56	0	0	0	0	0	0	0	0	0	0	0	0	0	0	0
halo	halo	FBtr0114554	FBgn0001174	616	GO:0005737,GO:0032879,GO:0042325,GO:0006869,GO:0031887,GO:0005811,GO:0005634,GO:0007018,GO:0019894		0	0	0	0	0	0	0	0.59	0	0		0	0	0	0	0	0	0	0	0	0	0	0	0	0	0	0	0	0	0	0	0	0	0	0	0	0	0	0	0	0	0	0
hay	haywire	FBtr0076253	FBgn0001179	2604	GO:0000381,GO:0006289,GO:0001113,GO:0005675,GO:0003677,GO:0005524,GO:0001111,GO:0043140,GO:0000990,GO:0040008,GO:0042127,GO:0006367,GO:0006355,GO:0004386,GO:0005634,GO:0009411,GO:0006366,GO:1903025		0	0	0	0	0	0	0	0	0	0		0	0	0	0	0	2.5	0	0	0	0	0	0	0	0	0	0	0	0	0	0	0	0	0	0	0	0	0	0	0	1.34	0	0
hay	haywire	FBtr0114599	FBgn0001179	2511	GO:0000381,GO:0006289,GO:0001113,GO:0005675,GO:0003677,GO:0005524,GO:0001111,GO:0043140,GO:0000990,GO:0040008,GO:0042127,GO:0006367,GO:0006355,GO:0004386,GO:0005634,GO:0009411,GO:0006366,GO:1903025		9.46	18.17	16.9	4.52	0	1.17	0	16.35	20.93	22.95		4.52	23.86	0	0	3.07	0.28	25.58	0.14	0.47	0	1.42	0	2.55	30.92	8.35	0.65	6.13	3.67	1.09	5.86	11.01	2.23	8.81	0	35.68	0	1.9	14.89	8.12	9.86	11.27	26.29
hb	hunchback	FBtr0081950	FBgn0001180	3181	GO:0007400,GO:0003705,GO:0008293,GO:0007362,GO:0045944,GO:0008595,GO:0007354,GO:0040034,GO:0048699,GO:0001763,GO:0000122,GO:0007402,GO:0043565,GO:0000981,GO:0007431,GO:0003700,GO:0000980,GO:0007355,GO:0035289,GO:0007427,GO:0005634,GO:0035290,GO:0044324,GO:0007419,GO:0007424		0.19	0.27	0	0	0	0	0	0.09	0	1.59		1.31	0.17	0.19	0	0.04	2.6	0.09	1.43	0.08	25.19	4.06	0.33	2.67	0	0	8.14	13.07	23.56	0.42	9.07	5.87	9.22	17.66	10.09	0	3.8	0	0	0	0	0	0
hb	hunchback	FBtr0081951	FBgn0001180	3338	GO:0007400,GO:0003705,GO:0008293,GO:0007362,GO:0045944,GO:0008595,GO:0007354,GO:0040034,GO:0048699,GO:0001763,GO:0000122,GO:0007402,GO:0043565,GO:0000981,GO:0007431,GO:0003700,GO:0000980,GO:0007355,GO:0035289,GO:0007427,GO:0005634,GO:0035290,GO:0044324,GO:0007419,GO:0007424		0	0	0	0	0	0	0	0	0	0		0.07	0	0	0	0	0	0	0	0	5.81	10.68	0	0.11	0.21	0	0	3.8	0.17	0	0.3	0.17	0.2	0.59	0	0.96	0	0	0	0	0	0.33	0.1
her	hermaphrodite	FBtr0080883	FBgn0001185	2070	GO:0007541,GO:0019101,GO:0007530,GO:0045944,GO:0003677,GO:0003676,GO:0007548,GO:0006357		6.61	6.04	19.26	2.42	9.89	38.59	0.16	11.02	21.52	5.46		4.28	18.13	3.21	0	2.08	21.4	0	8.51	0	0	17.92	0	12.17	34.19	2.69	5.72	15.35	14.59	0	3.88	67.92	0.19	18.37	0	4.63	72.51	4.99	4	9.61	10.39	0.55	0
her	hermaphrodite	FBtr0335138	FBgn0001185	2378	GO:0007541,GO:0019101,GO:0007530,GO:0045944,GO:0003677,GO:0003676,GO:0007548,GO:0006357		1.56	0	0	0	0	0	0	0	2.17	0		1.17	0	0	0.28	0	0.37	0	0	0	0.29	0.51	3.84	0.19	1.43	0	0	0.3	0	0.05	0	0	0	0	0.41	0	0	0	0	0	0.98	0	1.27
Hex-A	Hexokinase A	FBtr0071361	FBgn0001186	2512	GO:0006096,GO:0001678,GO:0004340,GO:0004396,GO:0005524,GO:0005536,GO:0060361,GO:0008865,GO:0046835,GO:0019158,GO:0005829		8.96	14.97	8.71	0.44	0	0	17.64	23.3	5.83	14.72		13.42	0	0	0	2.6	2.53	0	32.06	0	0	0	0	0	0	0	162.1	0	13.38	0.53	11.95	18.48	42.16	0	0	0	0	29.01	25.56	27.5	113.51	22.12	0
Hex-A	Hexokinase A	FBtr0071362	FBgn0001186	2512	GO:0006096,GO:0001678,GO:0004340,GO:0004396,GO:0005524,GO:0005536,GO:0060361,GO:0008865,GO:0046835,GO:0019158,GO:0005829		8.96	14.97	8.71	0.44	0	0	17.64	23.3	5.83	14.72		13.42	0	0	0	2.6	2.53	0	32.06	0	0	0	0	0	0	0	162.1	0	13.38	0.53	11.95	18.48	42.16	0	0	0	0	29.01	25.56	27.5	113.51	22.12	0
Hex-A	Hexokinase A	FBtr0333335	FBgn0001186	4139	GO:0006096,GO:0001678,GO:0004340,GO:0004396,GO:0005524,GO:0005536,GO:0060361,GO:0008865,GO:0046835,GO:0019158,GO:0005829		109.93	135.81	138.3	59.32	54.9	107.55	101.43	72.68	43.63	74.67		112.33	129.98	334.65	296.97	83.75	32.29	89.27	123.29	165.87	135.42	253.58	426.18	284.9	279.1	770.85	225.59	135.35	35.61	22.17	25.62	33.05	108.78	364.95	270.9	207.51	739.45	91.74	63.43	99.12	55.3	80.72	63.66
Hex-C	Hexokinase C	FBtr0087399	FBgn0001187	1493	GO:0006096,GO:0001678,GO:0004340,GO:0004396,GO:0005524,GO:0005536,GO:0010906,GO:0008865,GO:0046331,GO:0046835,GO:0019158,GO:0005829		2.16	2.44	2.34	0	0	1.64	0	1.74	0	3.43		3.59	0.76	0.14	0	26.07	0.43	0	0	0	0	0	3.62	0.09	0	0	213.63	0.07	0	0	0	0	5.01	4.66	0	1.89	0	0	0	0	0	0	0
hfw	halfway	FBtr0070270	FBgn0001189	2540	GO:0035075,GO:0003674,GO:0035073,GO:0035556		0	0	0	0	0	0	0	0	0	0		0	0	0	0	0	0	0	0	0	0	0	0	0	0	0	0	0	0	0	0	0	0	0	0	0	0	0	0	0	0	0	0
hfw	halfway	FBtr0333115	FBgn0001189	3038	GO:0035075,GO:0003674,GO:0035073,GO:0035556		2.43	2.33	2.19	10.13	2.01	6.36	11.52	3.91	1.95	1.99		8.29	0.75	9.74	0	10.05	2.01	0.12	1.95	1.17	16.64	9.01	7.98	2.73	16.75	7.8	30.19	41.84	1.05	0.05	0.94	0.08	8.6	7.31	4.08	4.31	0.35	0	0.51	0.2	0.41	3.7	2.77
His2Av	Histone H2A variant	FBtr0085062	FBgn0001197	912	GO:0035267,GO:0000790,GO:0003677,GO:0000786,GO:0005701,GO:0036098,GO:0035019,GO:0005700,GO:0006342,GO:0005694,GO:0046982,GO:0006974,GO:0005634,GO:0071168,GO:0035861		191.51	296.86	309.61	253.87	14.37	53.13	60.15	225.01	44.03	131.68		96.93	19.84	16.25	9.42	199.95	50.15	22.02	46.56	81.33	26.49	320.67	355.54	211.11	144.94	605.83	164.43	109.14	152.26	200.81	161.56	134.36	178.13	34.36	33.14	118.69	123.63	33.66	35.09	10.28	47.57	43.26	112.07
His2Av	Histone H2A variant	FBtr0334311	FBgn0001197	1169	GO:0035267,GO:0000790,GO:0003677,GO:0000786,GO:0005701,GO:0036098,GO:0035019,GO:0005700,GO:0006342,GO:0005694,GO:0046982,GO:0006974,GO:0005634,GO:0071168,GO:0035861		4.87	2.94	1.82	2.28	0.11	3.72	13.52	4.1	6.67	3.4		7.22	0.71	0.63	1.6	1.67	0	0	0.58	0.29	0.18	3.95	5.04	5.82	25.36	0.36	2.91	12.39	9.56	0	0	0	3.07	36.38	4.42	5.04	0	2.64	3.96	0.53	0	2.56	12.86
hook	hook	FBtr0081180	FBgn0001202	2317	GO:0005737,GO:0017137,GO:0006909,GO:0030705,GO:0051959,GO:0008017,GO:0005768,GO:0006897,GO:0045202,GO:0045467,GO:0031122,GO:0005813,GO:0008340		41.57	41.84	39.39	41.96	0.04	31.9	52.26	42.28	70.84	23.04		23.78	40.53	24.68	12.49	104.82	111.89	12.85	26.43	0.62	20.46	15.08	34.48	16.32	11.99	10.07	183.06	8.33	48.22	44.81	45.8	7.34	26.01	59.38	0	80.36	0	62.55	40.35	41.38	76.18	50.26	113.57
Hmr	Hybrid male rescue	FBtr0071511	FBgn0001206	4696	GO:0035012,GO:0010529,GO:0005730,GO:0010528,GO:0005701,GO:0005700,GO:0005854,GO:0000775,GO:0000723,GO:0000792,GO:0005515,GO:0000070		11.26	13.42	12.02	6.04	0.16	17.46	12.81	13.61	12.54	8.14		1.43	1.47	0	22.06	23.23	2.08	10.86	0.59	0.16	7.01	14.22	14.98	5.72	6.42	5.76	0.34	9.99	4.05	14.33	6.98	1.14	7.18	0.47	11.69	20.06	12.78	0	0	0.13	0.14	0.23	3.54
Hn	Henna	FBtr0076811	FBgn0001208	1625	GO:0006909,GO:0006559,GO:0005506,GO:0055114,GO:0004505,GO:0006726,GO:0007616		0	0	0	0	0	0	0	0	0	0		0.51	0	0	0	0	0	0	0	0	0	0	0	0	0	0	0	0	0	0	0	0	0	0	0	0	0	0	0	0	0	0	0
Hn	Henna	FBtr0100225	FBgn0001208	1617	GO:0006909,GO:0006559,GO:0005506,GO:0055114,GO:0004505,GO:0006726,GO:0007616		0	0	0	0	0	0	0	0	0	0		0	0	0	0	0	0	0	0	0	0	1.36	0	0	0	0	0	0	0	0	0	0	0	0	0	0.41	0	0	0	0	0	0	0
Hn	Henna	FBtr0334645	FBgn0001208	1527	GO:0006909,GO:0006559,GO:0005506,GO:0055114,GO:0004505,GO:0006726,GO:0007616		0.21	0	0	0	0	0	0	0	0	0		0	0	2.25	130.53	0	0	0	0	0	0	9.03	0	0.13	0	0.99	0	3.7	0	0	0	0	1.32	0	0	0	0	0	0	0	0	0	0
Hn	Henna	FBtr0334646	FBgn0001208	1821	GO:0006909,GO:0006559,GO:0005506,GO:0055114,GO:0004505,GO:0006726,GO:0007616		0	0	0	0	0	0	4.08	0	0	0		0	0	0	0	0	0	0	0	0	0	0	0	0	0	0	0	0	0	0	0	0	0	0	0	0.42	0	0	0	0	0	0	0
Hrb98DE	Heterogeneous nuclear ribonucleoprotein at 98DE	FBtr0085298	FBgn0001215	2265	GO:0005703,GO:0048027,GO:0000381,GO:0003729,GO:0048477,GO:0045727,GO:0043565,GO:0033119,GO:0036099,GO:0030529,GO:0010906,GO:0001745,GO:0005634		27.22	1.91	120.33	0	0	0.03	0	0	0	0		3.16	0	0	0	0	0	0	0	0	0	0	190.64	0	0	0	0	0	0	0	0	0	0	0	0	0	0	0	0	0	0	0	0
Hrb98DE	Heterogeneous nuclear ribonucleoprotein at 98DE	FBtr0085299	FBgn0001215	2253	GO:0005703,GO:0048027,GO:0000381,GO:0003729,GO:0048477,GO:0045727,GO:0043565,GO:0033119,GO:0036099,GO:0030529,GO:0010906,GO:0001745,GO:0005634		35.93	43.4	27.29	0	125.59	101.95	57.79	0	6.02	24.63		27.6	23.97	111.15	0	32.86	64.27	9.94	87.84	184.09	81.95	147.75	0	64.36	226.87	525.58	72.1	136.27	0	2.27	33.31	0	0	51.43	206.75	1.49	30.56	16.51	16.88	12.12	5.92	17.92	241.58
Hrb98DE	Heterogeneous nuclear ribonucleoprotein at 98DE	FBtr0085300	FBgn0001215	1542	GO:0005703,GO:0048027,GO:0000381,GO:0003729,GO:0048477,GO:0045727,GO:0043565,GO:0033119,GO:0036099,GO:0030529,GO:0010906,GO:0001745,GO:0005634		5.32	1.05	0	0	0	6.4	0	63.67	28.4	2.78		17.73	0	0	0	13.08	0	0	0	0	0	0	0	0	0	0	0	0	0	0	0	0	0	0	0	0	0	0	0.83	0	16.23	0	0
Hrb98DE	Heterogeneous nuclear ribonucleoprotein at 98DE	FBtr0085301	FBgn0001215	2261	GO:0005703,GO:0048027,GO:0000381,GO:0003729,GO:0048477,GO:0045727,GO:0043565,GO:0033119,GO:0036099,GO:0030529,GO:0010906,GO:0001745,GO:0005634		50.84	87.3	31.56	213.23	19.94	0	0	180.35	20.21	72.82		13.88	0	0	276.82	93.64	28.03	0	0	0	0	0	0	0	0	0	0	0	44.91	0.71	37.12	50.06	57.02	0	0	62.56	0	0	0	0	15.52	0	0
Hrb98DE	Heterogeneous nuclear ribonucleoprotein at 98DE	FBtr0085302	FBgn0001215	1913	GO:0005703,GO:0048027,GO:0000381,GO:0003729,GO:0048477,GO:0045727,GO:0043565,GO:0033119,GO:0036099,GO:0030529,GO:0010906,GO:0001745,GO:0005634		301.92	388.09	254.6	0	281.18	340.68	104.42	290.7	111.32	171.66		102.05	110.88	576.85	98.19	150.82	144.78	152.96	36.01	0	149.7	130.29	0	150.17	210.43	439.27	0	0	161.76	30.08	53.99	132.46	182.02	0	386.01	10.47	468.19	0	0	0	0	0	0.77
Hrb98DE	Heterogeneous nuclear ribonucleoprotein at 98DE	FBtr0085303	FBgn0001215	1530	GO:0005703,GO:0048027,GO:0000381,GO:0003729,GO:0048477,GO:0045727,GO:0043565,GO:0033119,GO:0036099,GO:0030529,GO:0010906,GO:0001745,GO:0005634		23.49	19.37	5.91	78.49	90.58	0.19	97.08	0.1	17.62	42.95		5.26	0	59.44	209.59	88.73	64.66	0.1	2.31	0.27	12.31	66.41	0.66	17.41	109.44	83.86	18.02	70.95	84.06	70.07	26.67	50.29	42.74	68.29	1.22	147.71	5.29	1.96	9.74	5.28	0	7.81	0.9
Hsc70-1	Heat shock protein cognate 1	FBtr0075761	FBgn0001216	2611	GO:0006457,GO:0005739		0.32	3	0.86	0	0	0	0	1.28	0	0		0	1.51	0.85	0	0	0	0	4.93	0	0	0	0	1.55	1.61	0	0	1.34	0.8	0	0	0	0	0	0	0	0	0	0	0	0	0	0.64
Hsc70-1	Heat shock protein cognate 1	FBtr0075762	FBgn0001216	2168	GO:0006457,GO:0005739		3.15	3.79	0	0.25	47.59	0	0	0	2.42	2.01		0.6	0	4.1	0	0.31	0.4	0	0.32	0	0.19	6.64	0	0	0	0	0	1.36	1.67	0	0.32	0	0	0	0	4.16	0	0	3.16	0	0	0	0
Hsc70-1	Heat shock protein cognate 1	FBtr0075763	FBgn0001216	2543	GO:0006457,GO:0005739		0	0.09	0	0.68	0	0	0	0	0	1.53		0	0	0	0	0	0	13.33	3.42	0	0	5.4	0	0	0	0	0	0.65	0	0	0	0	0.22	0.47	0	16.08	0	0	0	0	0	0	0
Hsc70-2	Heat shock protein cognate 2	FBtr0082707	FBgn0001217	2174	GO:0005739,GO:0006457,GO:0051082		0	0	0	0	0	0	0	0	0	0		0	0	0	0	0	0	0	0	0	0	0.06	0	0	0	0	0	0	0	0	0	0	0	0	0	0	0	0	0	0	0	0	0
Hsc70-3	Heat shock 70-kDa protein cognate 3	FBtr0073608	FBgn0001218	3158	GO:0036335,GO:0030431,GO:0005615,GO:0005783,GO:0034976,GO:0010906,GO:0012505,GO:0016246		3.71	0.47	3.79	2.68	0	0.94	19.84	0	0	1.55		7.4	76.43	0	0	0	2.28	0	0	0	7.54	3.64	2.85	8.44	11.18	0	0	13.67	1.5	0	100.32	12.03	5.11	44	0	17.15	1.29	22.06	6.83	4.66	0	3.45	0.48
Hsc70-3	Heat shock 70-kDa protein cognate 3	FBtr0073609	FBgn0001218	3019	GO:0036335,GO:0030431,GO:0005615,GO:0005783,GO:0034976,GO:0010906,GO:0012505,GO:0016246		20.44	32.43	42.55	0	0	0	5.5	77.97	60.87	42.82		26.26	0	0	0	15.03	21.75	0	0	0	0	28.93	39.34	0	0	0	0	23.27	22.04	20.52	13.1	48.57	7.23	0	0	3.78	0	39.97	22.15	85.22	48.5	65.53	0
Hsc70-3	Heat shock 70-kDa protein cognate 3	FBtr0073610	FBgn0001218	3185	GO:0036335,GO:0030431,GO:0005615,GO:0005783,GO:0034976,GO:0010906,GO:0012505,GO:0016246		1.39	0	0.43	0	0.46	0	0	2.14	1.4	0.94		0.87	0	0	0	0	0	0	0	0	0	3.73	0	0	35.86	0	0	3.28	0.7	0.6	11.33	0.43	0	0	0	4.77	0	1.39	0	0	0	0	0
Hsc70-3	Heat shock 70-kDa protein cognate 3	FBtr0073611	FBgn0001218	2985	GO:0036335,GO:0030431,GO:0005615,GO:0005783,GO:0034976,GO:0010906,GO:0012505,GO:0016246		34.8	0	0	61.05	56.21	27.56	0	9.58	0	14.11		0	0	85.38	74.5	0	7.75	0	0	12.78	63.51	100.44	0	0	4.42	51.94	61.13	0	2.48	69.1	2.96	16.05	0	0.21	99.56	0	46.44	26.47	44.33	0	41.73	0	153.12
Hsc70-3	Heat shock 70-kDa protein cognate 3	FBtr0345166	FBgn0001218	2988	GO:0036335,GO:0030431,GO:0005615,GO:0005783,GO:0034976,GO:0010906,GO:0012505,GO:0016246		59.6	86.44	23.64	31.56	0.05	102.38	104.35	11.37	14.59	31.01		58.99	7.01	0.02	0.02	93.45	0	14.2	41.98	0	0.03	68.54	125.87	140.3	133.46	0.03	0.01	146.8	50.28	39.11	36.79	46.78	80.95	78.67	0.02	126.79	0.01	0.04	0	23.3	0	0	0.09
Hsc70-5	Heat shock protein cognate 5	FBtr0087568	FBgn0001220	2922	GO:0000422,GO:0010918,GO:0006457,GO:0005524,GO:0005739,GO:0051082,GO:0070584		0.72	0	0	0	0	0	1.6	0	0	1.73		0	0	0	0	0	0	0	0	0	0	0	0	0	0	0	0	0	0	0	0	0	0.68	0	0	0.9	0	0	0	0	0	0	0
Hsc70-5	Heat shock protein cognate 5	FBtr0339969	FBgn0001220	2791	GO:0000422,GO:0010918,GO:0006457,GO:0005524,GO:0005739,GO:0051082,GO:0070584		35.7	42.48	45.78	137.28	8.33	52.25	48.52	47.45	29.01	52.62		37.17	39.41	14.84	17.71	61.14	22.69	18.1	11.7	32.39	21.44	33.94	34.78	33.95	78.19	19.84	57.27	48.32	22.97	43.03	28.56	33.11	18.82	49.54	16.92	65.63	9.9	68.8	39.96	23.68	39.33	57.67	68.41
Hsf	Heat shock factor	FBtr0086782	FBgn0001222	2771	GO:0009408,GO:0045944,GO:0003677,GO:0045893,GO:0043565,GO:0043388,GO:0000785,GO:0005700,GO:0005515,GO:0003700,GO:0045892,GO:0042742,GO:0050832,GO:0005634		8.09	16.27	21.93	23.43	80.34	27.01	29.72	4.96	9.54	10.3		7.82	0	15.43	0	1.22	0	6.54	0.4	0	10.75	3.06	3.91	3.27	14.9	35.35	28.46	14.7	14.38	0.09	34.3	8.47	17.07	62.1	0.42	47.95	0.76	6.17	0.12	0.9	2.57	4.26	0.11
Hsf	Heat shock factor	FBtr0110964	FBgn0001222	2843	GO:0009408,GO:0045944,GO:0003677,GO:0045893,GO:0043565,GO:0043388,GO:0000785,GO:0005700,GO:0005515,GO:0003700,GO:0045892,GO:0042742,GO:0050832,GO:0005634		2.45	3.82	0.72	1.28	0	0	1.1	1.51	1.88	1.32		0	0	1.74	0	16.97	12.13	0.56	0	4.58	0	18.81	0	6.58	0	0	0	0	2.77	0	4.67	0.32	0	0	0	6.68	0	0	0	0	3.4	0	1.89
Hsf	Heat shock factor	FBtr0110965	FBgn0001222	2838	GO:0009408,GO:0045944,GO:0003677,GO:0045893,GO:0043565,GO:0043388,GO:0000785,GO:0005700,GO:0005515,GO:0003700,GO:0045892,GO:0042742,GO:0050832,GO:0005634		9.57	4.03	8.47	0.17	0	4.69	0.54	8.78	4.77	3.34		2.26	0	0	0	0.21	0.56	0	1.54	0	0	0	0	0	0.69	0	0	6.94	4.47	0	8.7	0	4.11	10.45	0	15.01	0	0	0	0	0	0	0
Hsf	Heat shock factor	FBtr0110966	FBgn0001222	2897	GO:0009408,GO:0045944,GO:0003677,GO:0045893,GO:0043565,GO:0043388,GO:0000785,GO:0005700,GO:0005515,GO:0003700,GO:0045892,GO:0042742,GO:0050832,GO:0005634		3.09	6.91	1.47	0	0	0	0	6.91	0	5.08		1.53	0	0	0	0	0	0	0	0	0	7.14	0.65	0	0	0	0	0	0	0	0	0	0	0	0	0	0	0	0	0	0	0	0
Hsp22	Heat shock protein 22	FBtr0100558	FBgn0001223	1900	GO:0061077,GO:0042802,GO:0009408,GO:0006979,GO:0005759,GO:0051082,GO:0008340		0.15	0.95	0.24	0.3	0.05	0	0	0.37	0.1	0.25		0.64	0.07	0.1	0.11	0.43	0.26	0	0.44	0	0	4.45	0.14	0.45	3.14	1.53	0	0.59	0.13	1	0.17	0.11	0.14	0.15	0.59	2.77	0.12	0.7	0.16	0	0	0.19	0
Hsp22	Heat shock protein 22	FBtr0100559	FBgn0001223	968	GO:0061077,GO:0042802,GO:0009408,GO:0006979,GO:0005759,GO:0051082,GO:0008340		189.14	254.66	264.35	270.58	1.67	53.83	8.21	99.22	79.31	227.93		137.94	6.11	162.26	6.69	91.78	171.51	56.19	86.41	56.97	7.14	195.29	525.05	159.9	1021.18	313.91	156.42	278.41	110.24	34.63	215.57	30.71	52.69	153.52	37.46	196.58	9.21	33.14	25.62	33.22	64.25	7.03	63.69
Hsp23	Heat shock protein 23	FBtr0076453	FBgn0001224	849	GO:0061077,GO:0009408,GO:0009631,GO:0003779,GO:0051082,GO:0042026,GO:0005515,GO:0001666		93.79	140.33	106.01	27.85	0	0	0	73.05	113.1	0		0	0	0	0	26.38	29.72	0	0	42.05	0	0	0	0	0	0	282.35	0	0	31.25	95.44	14.95	0	59.35	175.33	0	7.57	359.15	498.46	389.89	605.59	401.96	0
Hsp23	Heat shock protein 23	FBtr0309504	FBgn0001224	884	GO:0061077,GO:0009408,GO:0009631,GO:0003779,GO:0051082,GO:0042026,GO:0005515,GO:0001666		171.09	263.46	279.04	172.76	0	14.44	0	97.19	82.94	238.56		132.66	129.42	82.47	82.53	207.94	68.11	234.44	247.02	63.46	374.94	260.35	346.08	106.95	1324.29	282.76	225.35	133.44	95.61	98.4	80.79	63.75	131.46	154.56	261.01	437.92	0	63.64	226.15	313.08	157.76	318.27	214.47
Hsp26	Heat shock protein 26	FBtr0076496	FBgn0001225	958	GO:0005737,GO:0061077,GO:0009408,GO:0009631,GO:0051082,GO:0042026,GO:0008340,GO:0017022		421.48	635.91	494.18	359.62	34.33	28.77	135.57	274.3	174.74	526.59		163.3	216.2	278.94	66.2	781.48	239.07	0	70.32	6.17	0	29.85	443.24	93.88	805.44	828.82	1665.1	251.3	137.74	493.86	260.67	171.54	159.22	235.56	97.55	591.14	176.72	126.08	33.46	123.26	93.58	87.76	56.12
Hsp26	Heat shock protein 26	FBtr0346539	FBgn0001225	1010	GO:0005737,GO:0061077,GO:0009408,GO:0009631,GO:0051082,GO:0042026,GO:0008340,GO:0017022		88.74	96.66	74.73	36.86	5.29	6.36	1.95	33.83	32.47	45.83		14.95	0	0	4.11	25.59	17.65	41.89	0	0	119.37	65.13	25.37	60.91	90.02	35.37	18.3	50.74	58.56	0	10.15	18.77	33.72	3.69	0	43.28	0	29.43	43.49	25.85	250.02	78.85	6.26
Hsp27	Heat shock protein 27	FBtr0076454	FBgn0001226	1220	GO:0005737,GO:0061077,GO:0009408,GO:0042595,GO:0051082,GO:0042026,GO:0005515,GO:0042742,GO:0050832,GO:0005634,GO:0008340		128.15	244.74	159.59	0	0	2.48	0	53.17	44.91	82.04		32.99	0	30.97	0	34.08	19.28	6.48	14.2	28.27	27.65	30.6	86.28	75.89	42.35	178.02	232.6	49.6	71.93	14.28	64.69	32.09	28.66	3.49	6.02	90.51	1.89	18.03	9.71	21.95	28.14	25.49	20.8
Hsp27	Heat shock protein 27	FBtr0346541	FBgn0001226	1632	GO:0005737,GO:0061077,GO:0009408,GO:0042595,GO:0051082,GO:0042026,GO:0005515,GO:0042742,GO:0050832,GO:0005634,GO:0008340		3.95	8.13	7.3	22.96	1.81	2.96	1.43	1.32	0.23	5.84		0.65	7.41	0.45	37.79	1.21	1.11	0.64	2.03	0	1.29	0.55	11.81	2.34	85.23	2.63	0	9.02	7.74	0.84	1.03	1.91	5.36	5.73	0.46	11.27	0	0	0	0.68	0	0	1.37
Hsp67Ba	Heat shock gene 67Ba	FBtr0076495	FBgn0001227	1733	GO:0061077,GO:0009408,GO:0005575,GO:0051082		3.12	1.21	1.49	2.17	0	0	0	0	0	2.26		6.38	6.79	0	0	3.79	0.58	18.05	16.36	0.15	12.43	49.42	106.92	8.3	2.41	2.03	0.85	3.91	4.05	0	0.07	0.18	2.28	0	0	0.83	0.14	63.15	32.91	77.64	95.34	81.95	43.78
CG4456		FBtr0100653	FBgn0001228	427			0	0	0	0	0	0	0	0	0	0		0	0	0	0	0	0	0	0	0	0	0	0	0	0	0	0	0	0	0	0	0	0	0	0	0	0	0	0	0	0	0	0
CG4456		FBtr0100655	FBgn0001228	1900			0.15	0.95	0.24	0.3	0.05	0	0	0.37	0.1	0.25		0.64	0.07	0.1	0.11	0.43	0.26	0	0.44	0	0	4.45	0.14	0.45	3.14	1.53	0	0.59	0.13	1	0.17	0.11	0.14	0.15	0.59	2.77	0.12	0.7	0.16	0	0	0.19	0
CG4456		FBtr0303473	FBgn0001228	724			0	0	0	0	0	0	0	0	0	0		0	0	0	0	0	0	0	0	0	0	0	0.63	0	0	0	0	0	0	0	0	0	0	0	0	0	0	0	0	0	0	0	0
CG4456		FBtr0303474	FBgn0001228	636			0	0	0.23	0	0	0	0	0	0	0		0.28	0	0	0	0	0	0	0	0	0	3.93	11.09	0	0	0	0	0	0	0	0	0	0	0	0	18.18	0	0	0	0	0	0	0
Hsp67Bc	Heat shock gene 67Bc	FBtr0076497	FBgn0001229	987	GO:0009408,GO:0010506,GO:0061077,GO:1903061,GO:0051082,GO:0010998,GO:0005515,GO:0030018		3.95	12.65	10.46	12.78	0	0	0	33.89	0	0.55		14.05	2.9	0	0	0.6	0	0	2.97	1.02	0	2.08	71.36	26.49	41.23	9.58	0	0.35	0.14	0	10.69	38.03	9	0.11	2.62	108.16	0	99.02	105.55	33.51	48.64	53.85	0
Hsp68	Heat shock protein 68	FBtr0084589	FBgn0001230	2231	GO:0006457,GO:0005739,GO:0051082,GO:0008340,GO:0042594		509.79	809.38	554.38	261.04	16.42	38.53	24.32	436.33	423.35	423.47		307.02	189.31	109.12	94.05	418.47	645.34	9.87	51.86	0.18	0.13	93.98	90.47	114.58	1123.37	951.34	664.89	493.94	312.4	95.89	256.49	282.61	286.98	453.63	30.8	334.68	209.15	7.16	21.13	0.28	11.23	10.15	13.27
Hsp83	Heat shock protein 83	FBtr0073040	FBgn0001233	2713	GO:0007098,GO:0005737,GO:0019094,GO:0008293,GO:0007465,GO:0010529,GO:0008285,GO:0006457,GO:0009408,GO:0045187,GO:0008595,GO:0005524,GO:0048477,GO:0005886,GO:0009631,GO:0034605,GO:0051082,GO:0043248,GO:0005705,GO:0048471,GO:0007283,GO:0005813		543.63	639.68	531.02	175.58	30.88	135.94	177.78	261.52	279.69	349.38		450.86	64.58	80.06	106.6	199.29	174.41	200.92	109.06	43.42	55.88	146.3	116.84	156.96	437.32	370.23	333.99	190.7	62.09	109.1	59.06	101.52	182.05	291.51	47.96	315.98	11.99	197.44	192.22	104.89	154.61	94.2	156.88
Hsp83	Heat shock protein 83	FBtr0332873	FBgn0001233	2960	GO:0007098,GO:0005737,GO:0019094,GO:0008293,GO:0007465,GO:0010529,GO:0008285,GO:0006457,GO:0009408,GO:0045187,GO:0008595,GO:0005524,GO:0048477,GO:0005886,GO:0009631,GO:0034605,GO:0051082,GO:0043248,GO:0005705,GO:0048471,GO:0007283,GO:0005813		7.77	9.08	9.93	3.37	0.74	11.26	5.08	6.09	6.42	11.57		5.73	2.07	60.14	0	1.01	0.47	0.54	0.68	0	0	9.62	5.06	2.86	48.78	0.23	3.89	11.43	0	0	1.77	10.66	4.87	38.75	0	58.34	2.7	0	38.61	31.94	30.77	2.73	0
Hsromega	Heat shock RNA omega	FBtr0084057	FBgn0001234	1176	GO:0046330,GO:0032270,GO:0035062,GO:0008104,GO:0048477,GO:0000785,GO:0043065,GO:0035063,GO:0030162		0	0	0	0	0	0	9.95	0	0	0		17.41	0	0	0	0	0.39	0	0	0	61.52	0	26.22	0	0	0	0	0	0	0	0	0	0	0	0	0	0	219.31	18.37	51.93	21.69	116.74	0
Hsromega	Heat shock RNA omega	FBtr0084058	FBgn0001234	14086	GO:0046330,GO:0032270,GO:0035062,GO:0008104,GO:0048477,GO:0000785,GO:0043065,GO:0035063,GO:0030162		0	0	0	0	0	0	0	0	0	0		0	0	0	0	0	0	0	0	0	0	0	0	0	33.57	0	0	0	0	0	0	0	0	142.18	0	298.56	0	0.6	1.33	0	0	0	0
Hsromega	Heat shock RNA omega	FBtr0084059	FBgn0001234	1888	GO:0046330,GO:0032270,GO:0035062,GO:0008104,GO:0048477,GO:0000785,GO:0043065,GO:0035063,GO:0030162		1422.17	1858.51	1473.52	787.44	453.68	704.47	791.63	2727.81	2576.82	1576.96		309.35	251.61	806.25	1109.62	1656.88	903.85	0	645.51	0	0	1447.49	370.67	459.7	2754.92	1889.08	4372.33	560.48	1169.82	1088.32	1272.52	696.51	761.92	273.14	2187.92	957	610.59	126.83	366.72	360.68	709.66	272.33	416.88
Hsromega	Heat shock RNA omega	FBtr0309958	FBgn0001234	1670	GO:0046330,GO:0032270,GO:0035062,GO:0008104,GO:0048477,GO:0000785,GO:0043065,GO:0035063,GO:0030162		57.98	67.04	43.59	50.53	2.4	26.55	51.84	70.97	25.4	51.8		25.67	29.47	19.42	12.91	43.67	10.04	15.03	33.48	64.72	4.24	146.67	46.22	85.77	151.57	80.13	4.06	43.34	10.65	1.84	18.36	19.29	38.32	37.2	89.17	59.56	64.72	60.41	144.86	135.29	247.82	52	27.09
Hsromega	Heat shock RNA omega	FBtr0332373	FBgn0001234	21216	GO:0046330,GO:0032270,GO:0035062,GO:0008104,GO:0048477,GO:0000785,GO:0043065,GO:0035063,GO:0030162		293.42	367.78	427.98	187.62	92.52	99.3	116.31	388.45	194.42	305.59		134.25	1218.47	2162.9	850.72	110.94	109.05	1119.88	801.15	2085.52	763.29	1353.92	852.81	1629.71	2397.73	4169.72	1098	556.45	43.72	64.36	46.59	72.52	180.39	573.86	530.32	1213.17	1227.8	3.38	6.13	9.26	8.25	12.44	493.88
Hsromega	Heat shock RNA omega	FBtr0334316	FBgn0001234	13374	GO:0046330,GO:0032270,GO:0035062,GO:0008104,GO:0048477,GO:0000785,GO:0043065,GO:0035063,GO:0030162		0	0	0	0	0	0	0	0	0	0		0	0	0	0	0	0	0	0	0	0	0	0	0	0	0	0	0	0	0	0	0	0	0	0	0	0	0	0	0	0	0	0
Hsromega	Heat shock RNA omega	FBtr0346801	FBgn0001234	2776	GO:0046330,GO:0032270,GO:0035062,GO:0008104,GO:0048477,GO:0000785,GO:0043065,GO:0035063,GO:0030162		826.89	1007.54	1059.17	187.68	280.15	231.75	188.98	882.19	556.93	865.04		86.65	580.68	1294.1	412.87	372.75	460.28	423.16	547.65	791.85	289.86	832.35	512.57	21.5	1019.47	1041.25	1127.51	516.63	200.81	238.86	245.38	224.06	124.99	1081.92	497.76	1109.15	1134.29	38.38	27.53	28.02	34.64	51.74	43.75
hth	homothorax	FBtr0082255	FBgn0001235	6557	GO:0003705,GO:0035282,GO:0007420,GO:0005737,GO:0035326,GO:0007422,GO:0003677,GO:0007432,GO:0001654,GO:0072002,GO:0005829,GO:0005667,GO:0048735,GO:0007380,GO:0007525,GO:0007480,GO:0042659,GO:0007383,GO:0001752,GO:0045944,GO:0009954,GO:0048749,GO:0045664,GO:0007479,GO:0008134,GO:0000060,GO:0005515,GO:0003700,GO:0060323,GO:0007476,GO:0090098,GO:0006357,GO:0010092,GO:0005634,GO:0034504		1.12	1.97	2.86	1.08	0.06	0	0.27	0.94	0.12	0.79		2.41	4.27	269.55	282.79	81.89	129.01	0.09	0.07	0.17	0.02	0.55	1.8	14.15	280.78	148.68	74.29	129.06	84.32	62.91	40.64	26.2	29.75	118.56	67.22	108.39	71.66	13.38	9.63	5.6	7.4	11.49	1.14
hth	homothorax	FBtr0082256	FBgn0001235	4226	GO:0003705,GO:0035282,GO:0007420,GO:0005737,GO:0035326,GO:0007422,GO:0003677,GO:0007432,GO:0001654,GO:0072002,GO:0005829,GO:0005667,GO:0048735,GO:0007380,GO:0007525,GO:0007480,GO:0042659,GO:0007383,GO:0001752,GO:0045944,GO:0009954,GO:0048749,GO:0045664,GO:0007479,GO:0008134,GO:0000060,GO:0005515,GO:0003700,GO:0060323,GO:0007476,GO:0090098,GO:0006357,GO:0010092,GO:0005634,GO:0034504		1.39	4.59	1.69	0	0	0	0	0.92	4.89	2.37		6.99	0.06	15.6	210.32	123.96	78.55	0	12.18	0	0	0.5	68.58	0.39	162.7	1062.32	100.43	40.48	60.6	260	0	84.37	30.96	89.81	0	1.72	75.68	17.02	3.27	17.49	14.84	3.39	1.04
hth	homothorax	FBtr0100454	FBgn0001235	3868	GO:0003705,GO:0035282,GO:0007420,GO:0005737,GO:0035326,GO:0007422,GO:0003677,GO:0007432,GO:0001654,GO:0072002,GO:0005829,GO:0005667,GO:0048735,GO:0007380,GO:0007525,GO:0007480,GO:0042659,GO:0007383,GO:0001752,GO:0045944,GO:0009954,GO:0048749,GO:0045664,GO:0007479,GO:0008134,GO:0000060,GO:0005515,GO:0003700,GO:0060323,GO:0007476,GO:0090098,GO:0006357,GO:0010092,GO:0005634,GO:0034504		57.27	53.98	66.65	29.33	24	143.5	23.01	29.7	18.71	33.94		21.97	8.04	7.85	26.21	20.29	8.78	7.01	8.19	32.83	2.86	67.85	44.61	56.35	170.24	458.34	54.16	25.09	31	0.86	11.83	31.57	52.79	103.73	0.93	134.69	183.37	1.47	4.09	6.35	10.33	5.53	15.68
hth	homothorax	FBtr0100455	FBgn0001235	2462	GO:0003705,GO:0035282,GO:0007420,GO:0005737,GO:0035326,GO:0007422,GO:0003677,GO:0007432,GO:0001654,GO:0072002,GO:0005829,GO:0005667,GO:0048735,GO:0007380,GO:0007525,GO:0007480,GO:0042659,GO:0007383,GO:0001752,GO:0045944,GO:0009954,GO:0048749,GO:0045664,GO:0007479,GO:0008134,GO:0000060,GO:0005515,GO:0003700,GO:0060323,GO:0007476,GO:0090098,GO:0006357,GO:0010092,GO:0005634,GO:0034504		35.1	28.25	52.8	39.17	0	3.23	64.89	36.64	37.77	22.32		18.6	236.03	1790.94	1265.53	616.78	771.23	0	0	0	99.92	0	0	34.97	1008.29	1126.09	526.11	588.53	765.53	788.18	382.82	298.1	356.36	23.08	272.33	402.64	11.15	87.98	66.84	54.57	78.1	24.59	38.49
hth	homothorax	FBtr0344145	FBgn0001235	6340	GO:0003705,GO:0035282,GO:0007420,GO:0005737,GO:0035326,GO:0007422,GO:0003677,GO:0007432,GO:0001654,GO:0072002,GO:0005829,GO:0005667,GO:0048735,GO:0007380,GO:0007525,GO:0007480,GO:0042659,GO:0007383,GO:0001752,GO:0045944,GO:0009954,GO:0048749,GO:0045664,GO:0007479,GO:0008134,GO:0000060,GO:0005515,GO:0003700,GO:0060323,GO:0007476,GO:0090098,GO:0006357,GO:0010092,GO:0005634,GO:0034504		37.13	40.65	45.02	65.2	77.86	28.53	16.05	20.84	8.86	13.69		26.5	85.54	1425.98	1065.71	163.72	167.04	36.31	45.15	135.73	43.8	96.74	59.07	99.46	760.42	1143.21	372.05	367.62	143.41	265.57	105.42	120.87	92.48	235.68	596.49	141.24	1424.22	17.79	16.95	26.53	16.87	25.37	109.2
Ide	Insulin degrading metalloproteinase	FBtr0273273	FBgn0001247	3439	GO:0005737,GO:0014067,GO:0045926,GO:0050829,GO:0004222,GO:0005886,GO:1901143,GO:0046662,GO:0048638,GO:0006508,GO:0045089,GO:0002021,GO:0005777,GO:0090062,GO:0008340,GO:0046872		62.48	72.99	40.42	42.85	0.17	36.82	34.97	58.47	49.46	43.31		24.35	27.54	93.8	1.47	71.68	197.57	8.65	13.14	0.29	5.04	19.93	47.15	26.11	57.8	23.59	212.05	37.12	75.08	28	53.59	130.78	25.24	52.64	59	68.88	32.27	11.03	7.5	11.08	9.19	13.78	8.2
Idh	Isocitrate dehydrogenase	FBtr0076667	FBgn0001248	1616	GO:0004450,GO:0000287,GO:0005739,GO:0006097,GO:0047988,GO:0005777,GO:0006099,GO:0006102,GO:0001561,GO:0051287		1.7	6	0.8	0	0.84	13.2	27.32	0	9.2	4.6		30.45	0	0	0	2.58	0.57	24.51	29.74	14.78	0	4.52	0.97	0	0	1.27	0	48.68	21.34	0	23.93	50.44	18.06	0	6.49	9.84	0	23.92	15.12	23.93	18.91	26.46	123.04
Idh	Isocitrate dehydrogenase	FBtr0076668	FBgn0001248	1646	GO:0004450,GO:0000287,GO:0005739,GO:0006097,GO:0047988,GO:0005777,GO:0006099,GO:0006102,GO:0001561,GO:0051287		0	0	0	0	0	0	0	0	0	0		0	0	0	0	0	0	0	0	0	0	0	0	0	0	0	0	0	0	0	0	0	0	0	0	0	0	0	0	0	0	0	5.91
Idh	Isocitrate dehydrogenase	FBtr0076669	FBgn0001248	2026	GO:0004450,GO:0000287,GO:0005739,GO:0006097,GO:0047988,GO:0005777,GO:0006099,GO:0006102,GO:0001561,GO:0051287		5.51	5.69	6.9	63.34	0	0	0	3.97	1.92	0		4.58	0	0	0	6.94	0	0	2.04	0	0	0	0	0	2.5	0	0	7.65	105.19	15.03	0	0	6.35	11.45	0	4.7	0	0	0	0	0	0	0
Idh	Isocitrate dehydrogenase	FBtr0076670	FBgn0001248	1944	GO:0004450,GO:0000287,GO:0005739,GO:0006097,GO:0047988,GO:0005777,GO:0006099,GO:0006102,GO:0001561,GO:0051287		0	0	0	0	0	0	0	0	0	0.35		0	0	0	0	0	0	0	3.55	1.11	0	0.29	7.11	0	0	0	0	0	0	0	4.88	0	0	0	0	0	0	4.79	0	0	0	0	0
Idh	Isocitrate dehydrogenase	FBtr0076671	FBgn0001248	1642	GO:0004450,GO:0000287,GO:0005739,GO:0006097,GO:0047988,GO:0005777,GO:0006099,GO:0006102,GO:0001561,GO:0051287		0	0	0	0	0	0	24.14	0	0	0		0	0.17	0	0.42	0	0	0	0	0	0	0	0	0.54	0	0	0	3.5	0.6	0.24	0	1.35	0	0	0	0	0	0	0	0	0	0	0
Idh	Isocitrate dehydrogenase	FBtr0076673	FBgn0001248	1809	GO:0004450,GO:0000287,GO:0005739,GO:0006097,GO:0047988,GO:0005777,GO:0006099,GO:0006102,GO:0001561,GO:0051287		0	0	0	1.13	0.96	0	0	0	0	0		0.84	0	0	0	1.92	1.16	0	0	0	0	0	0	0.22	0.63	0	0	0.47	0	0.18	0	0	0	0	0	1.76	0	0	0	0	0	0	2.1
Idh	Isocitrate dehydrogenase	FBtr0114548	FBgn0001248	1776	GO:0004450,GO:0000287,GO:0005739,GO:0006097,GO:0047988,GO:0005777,GO:0006099,GO:0006102,GO:0001561,GO:0051287		0	0	0	0	0	0	0	0	7.67	0		0	0	0	0	0	0	0	0	0	0	0	0	0	0	0	0	0	0	0	0	0.95	0.82	0	0	0	0	0	0	0	0	0	0
Idh	Isocitrate dehydrogenase	FBtr0114549	FBgn0001248	1899	GO:0004450,GO:0000287,GO:0005739,GO:0006097,GO:0047988,GO:0005777,GO:0006099,GO:0006102,GO:0001561,GO:0051287		0.51	0	0	1.46	0	0	0	7.53	0	0		0.84	0	0	0	0	0	0	0	0	0	0	0	0	0	0	0	1.78	0	0	0	0	0.29	0	0	0.62	0	0	0	0	0	0	0
Idh	Isocitrate dehydrogenase	FBtr0333058	FBgn0001248	1974	GO:0004450,GO:0000287,GO:0005739,GO:0006097,GO:0047988,GO:0005777,GO:0006099,GO:0006102,GO:0001561,GO:0051287		0	0	0	0	0	0	0	0	0	0		0	0	0	0	0	0	0	0	0	0	0	0	0	0	0	0	0	0	0	0	0	0	0	0	0	0	0	0	0	0	0	0.24
if	inflated	FBtr0074357	FBgn0001250	5724	GO:0033627,GO:0005887,GO:0007298,GO:0016203,GO:0005925,GO:0016337,GO:0034446,GO:0007157,GO:0007160,GO:0035160,GO:1990430,GO:0005886,GO:0007608,GO:0045214,GO:0004872,GO:0042383,GO:0021551,GO:0016477,GO:0007494,GO:0007431,GO:0007411,GO:0050840,GO:0035099,GO:0007475,GO:0030239,GO:0007476,GO:0007426,GO:0045185,GO:0046982,GO:0007427,GO:0008305,GO:0051492,GO:0050839,GO:0007414,GO:0009925,GO:0007419,GO:…		0	0	0	0	0	0	0	0	0	0		0	0	0	0	0	0	0	0	0	0	0	0	0	0	0	0	0	0	0	0	0	0	0	0	0	0	0	0	0	0	0	0
if	inflated	FBtr0301352	FBgn0001250	5649	GO:0033627,GO:0005887,GO:0007298,GO:0016203,GO:0005925,GO:0016337,GO:0034446,GO:0007157,GO:0007160,GO:0035160,GO:1990430,GO:0005886,GO:0007608,GO:0045214,GO:0004872,GO:0042383,GO:0021551,GO:0016477,GO:0007494,GO:0007431,GO:0007411,GO:0050840,GO:0035099,GO:0007475,GO:0030239,GO:0007476,GO:0007426,GO:0045185,GO:0046982,GO:0007427,GO:0008305,GO:0051492,GO:0050839,GO:0007414,GO:0009925,GO:0007419,GO:…		0	0.61	0.04	0	0	0	0	0	0	0		4.91	0	0	0	0	0	0	0.09	0	0	0	0	1.84	0	0	0	0.7	0	0	0	0	1.49	3.4	0	11.19	0	0	0.45	0	0.52	0.31	0
if	inflated	FBtr0301353	FBgn0001250	5683	GO:0033627,GO:0005887,GO:0007298,GO:0016203,GO:0005925,GO:0016337,GO:0034446,GO:0007157,GO:0007160,GO:0035160,GO:1990430,GO:0005886,GO:0007608,GO:0045214,GO:0004872,GO:0042383,GO:0021551,GO:0016477,GO:0007494,GO:0007431,GO:0007411,GO:0050840,GO:0035099,GO:0007475,GO:0030239,GO:0007476,GO:0007426,GO:0045185,GO:0046982,GO:0007427,GO:0008305,GO:0051492,GO:0050839,GO:0007414,GO:0009925,GO:0007419,GO:…		0	0	0	0	0	0	0	0	0	0		0	0	0	0	0	0	0	0	0	0	0	0	0	0	0	0	0	0	0	0	0	0	0	0	0	0	0	0	0	0	0	0
if	inflated	FBtr0301354	FBgn0001250	5818	GO:0033627,GO:0005887,GO:0007298,GO:0016203,GO:0005925,GO:0016337,GO:0034446,GO:0007157,GO:0007160,GO:0035160,GO:1990430,GO:0005886,GO:0007608,GO:0045214,GO:0004872,GO:0042383,GO:0021551,GO:0016477,GO:0007494,GO:0007431,GO:0007411,GO:0050840,GO:0035099,GO:0007475,GO:0030239,GO:0007476,GO:0007426,GO:0045185,GO:0046982,GO:0007427,GO:0008305,GO:0051492,GO:0050839,GO:0007414,GO:0009925,GO:0007419,GO:…		0.03	0	0	0	0	0	0	0	0	0		0	0	0	0	0	0	0	0	0	0	0.15	0	0	0	0	0	0	0	0	0	0	0	0	0	0	0	0	0	0	0	0	0
ImpE1	Ecdysone-inducible gene E1	FBtr0076606	FBgn0001253	6043	GO:0007561,GO:0019898,GO:0003674		0	0	0	0	0	0	0	0	0	0		27.63	0	0	0	0	0	0	0	0	0	0.8	0.02	20.99	0.07	0.12	0	0.02	0	0	0	0	15.66	0.74	0	0	0	0	0	0.05	0.7	0	0
ImpE1	Ecdysone-inducible gene E1	FBtr0076607	FBgn0001253	919	GO:0007561,GO:0019898,GO:0003674		0	0	0	0	0	0	0	0	0	0		0.12	0	0	0	0	0	0	0	0	0	0	0	0	0	0	0	0	0	0	0	0	0	0	0	0	0	0	0.84	0	0	0	0
ImpE1	Ecdysone-inducible gene E1	FBtr0333057	FBgn0001253	6099	GO:0007561,GO:0019898,GO:0003674		0	0	0	0	0	0	0	0	0	0		0	0	0	0	0	0	0	0	0	0	0	0	0	0	0	0	0	0	0	0	0	0	0	0	0	0	0	0.06	0	0	0	0
ImpE2	Ecdysone-inducible gene E2	FBtr0073141	FBgn0001254	1708	GO:0007561,GO:0019898,GO:0005737,GO:0005576		0.44	0.66	0.36	1.25	0	0	47.36	1.85	0	0		0	0	0	0	0	0	0	0	0	0	0	0	0	0	0	0	0.06	0	0	0	0	0	0	0.35	0.19	0	0	0	0	0	0	0
ImpE3	Ecdysone-inducible gene E3	FBtr0310412	FBgn0001255	1094	GO:0007561,GO:0019898,GO:0005886		2.26	0.33	1.19	7.98	0	0.6	0	7.87	0.31	0.24		0.19	0	0	0	0	0	0	0	0	0	9.15	1.24	0.66	3.62	0	0	0.2	2.52	0	0	0	0.29	15.37	0	5.13	0	0	0	0	0	0	0
ImpL1	Ecdysone-inducible gene L1	FBtr0075842	FBgn0001256	1160			0	0	0	0	0	0	0	0	0	0		0	0	0	0	0	0	0	0	0	0	0	0	0	0	0	0	0	0	0	0	0	0	0	0	0	0	0	0	0	0	0	0
ImpL1	Ecdysone-inducible gene L1	FBtr0075843	FBgn0001256	1230			0	0	0	0	0	0	0	0	0	0		0	0	0	0	0	0	0	0	0	0	0	0	0	0	0	0	0	0	0	0	0	0	0	0	0	0	0	0	0	0	0	0
ImpL1	Ecdysone-inducible gene L1	FBtr0301405	FBgn0001256	1157			0	0	0	0	0	0	0	0	0.1	0		0.35	0	0	0	0	0	0	0	0	0	0	0	0	0	0	0	0	0	0	0	0	0	0	0	0	0	0	0	0	0	0	0
ImpL2	Ecdysone-inducible gene L2	FBtr0073248	FBgn0001257	1167	GO:0007155,GO:0005520,GO:0005615,GO:0046627,GO:0010888,GO:0046628,GO:0008340		0	0	0	0	0	0	0	0	0	0		0.11	0.4	0	0	0	0	0	0	0	0	0	0	0	0	0	0	5.33	0	0	0	0	0	0	0	0	0	0	0	0	0	0	0
ImpL2	Ecdysone-inducible gene L2	FBtr0073249	FBgn0001257	1651	GO:0007155,GO:0005520,GO:0005615,GO:0046627,GO:0010888,GO:0046628,GO:0008340		0	0	0	0	0	0	0	0	0	0		0	0	0	0	0	0	0	0	0	0	0	0	0	0	0	0	0	0.08	0	0	0	5.43	0	0.12	0	0	0	0	0	0	0	0
ImpL2	Ecdysone-inducible gene L2	FBtr0073250	FBgn0001257	989	GO:0007155,GO:0005520,GO:0005615,GO:0046627,GO:0010888,GO:0046628,GO:0008340		0	0	0	0	0	0	0	0.69	7.21	0		0	0	0	0	0	0	0	1.04	0	0	0	1.71	0	0	0	0	0	0	0	0	0	3.21	0	0	0	0	0	0	0	0	0	0
ImpL2	Ecdysone-inducible gene L2	FBtr0333569	FBgn0001257	2355	GO:0007155,GO:0005520,GO:0005615,GO:0046627,GO:0010888,GO:0046628,GO:0008340		0.13	0.05	0.2	0	0	0	0	0.3	0	0		6.23	70.95	0	0	0	0	0	0.55	0	0	1.52	0	3.19	2.58	0	0	7.94	0	0	0	0	0.25	1.93	0	1.13	13.56	0	0	0	0	0	0
ImpL3	Ecdysone-inducible gene L3	FBtr0077008	FBgn0001258	1391	GO:0005737,GO:0055114,GO:0005975,GO:0004459,GO:0007525,GO:0007520,GO:0019752		0	0.45	0	0	0	0	0.08	0	0	0		0	0	0	0	0	0	0	0	0	0	0	0	0	0	0	0	0	0	0	0	0	0	0	0	0	0	0	0	0	0	0	0
ImpL3	Ecdysone-inducible gene L3	FBtr0332065	FBgn0001258	1778	GO:0005737,GO:0055114,GO:0005975,GO:0004459,GO:0007525,GO:0007520,GO:0019752		1.72	1.05	0	0	0	0	0	0	0	0		0	6.92	0	0	0	0	0	0	0.26	0	0	0	0.3	0	0.08	0	0	0	0	0	0	0	0	0	0.12	0	0	0	0	0	0	196.9
ImpL3	Ecdysone-inducible gene L3	FBtr0332066	FBgn0001258	1324	GO:0005737,GO:0055114,GO:0005975,GO:0004459,GO:0007525,GO:0007520,GO:0019752		0	2.61	0.96	0	0	0	0	0	0	0		1.29	0	0	0	0	0	0	0	0.16	0	0	0	0	0.58	0	0	0	0	0	0	0	0	0.08	0	0	0	0	0	0	0	0	0
ImpL3	Ecdysone-inducible gene L3	FBtr0332067	FBgn0001258	1350	GO:0005737,GO:0055114,GO:0005975,GO:0004459,GO:0007525,GO:0007520,GO:0019752		0	0	0	0	0	0	0	0	0	0		0	0	0	0	0	0	0	0	0	0	0	0	0	0	0	0	0	0	0	0	0	0	0	0	0	0	0	0	0	0	0	0
in	inturned	FBtr0078183	FBgn0001259	3062	GO:0035316,GO:0001737,GO:0005886,GO:0001736		4.87	1.93	0.69	0	0	0	0.4	0.09	0	5.21		0.02	0	0.07	0	0	5.92	0	0	0	0	0	3.01	0	0.14	0	0	5.65	0	0	0	0	0	0	3.52	0	0	0	0	0	0	0	0
inaD	inactivation no afterpotential D	FBtr0071909	FBgn0001263	2295	GO:0008104,GO:0016028,GO:0016059,GO:0050962,GO:0005516,GO:0005886,GO:0009881,GO:0071482,GO:0031473,GO:0005198,GO:0005515,GO:0007602,GO:0030159,GO:0007605,GO:0017022,GO:0016027		0	0.29	0	0	0	0	0	0	0	0.11		1.31	0	0	0	0.52	0	0	0	0	0	0	0	0.31	0	0	0	0	0.06	0	0	0	0.17	0	0	0	0	0	0	0	0	0	0
inaD	inactivation no afterpotential D	FBtr0305132	FBgn0001263	2331	GO:0008104,GO:0016028,GO:0016059,GO:0050962,GO:0005516,GO:0005886,GO:0009881,GO:0071482,GO:0031473,GO:0005198,GO:0005515,GO:0007602,GO:0030159,GO:0007605,GO:0017022,GO:0016027		0	0	0	0	0	0	0	0	0	0		0	0	8.8	0	0	0	0	0	0	0	4.88	0	0	0	0	0	0	0	0	0	0	0	0	0	0	0	0	0	0	0	0	0
inv	invected	FBtr0088068	FBgn0001269	3404	GO:0007474,GO:0007400,GO:0048100,GO:0043565,GO:0007386,GO:0006355,GO:0050832,GO:0005634		0	0	0	0	0	0	0	0	0	0		0	0	0	0	0	0	0	0	0	0	0.47	0	0	0	0	0	0	0	0	0	0	0	0	0	0	0	0	0	0	0	0	0
inv	invected	FBtr0088069	FBgn0001269	2261	GO:0007474,GO:0007400,GO:0048100,GO:0043565,GO:0007386,GO:0006355,GO:0050832,GO:0005634		0	0	0	0	0	0	0	0	0	0		0	0	0	0	0	0	0	0	0	0	0	0	0	0	0.12	0	0	0	0	0	0	0	0	0	0	0	0	0	0	0	0	0
inv	invected	FBtr0345673	FBgn0001269	4776	GO:0007474,GO:0007400,GO:0048100,GO:0043565,GO:0007386,GO:0006355,GO:0050832,GO:0005634		0	0	0	0	0	0	0	0	0	0		0	0	0	0	0	0	0	0	0	0	0	0	0	0	0	0	0	0	0	0	0	0	0	0	0	0	0	0	0	0	0	0
ix	intersex	FBtr0088154	FBgn0001276	727	GO:0048804,GO:0019101,GO:0007530,GO:0035263,GO:0001104,GO:0060548,GO:0008134,GO:0007548,GO:0018993,GO:0006357,GO:0016592		19.98	10.01	3.31	0.32	0	112.04	135.81	7.59	12.83	8.23		8.18	0	0	0	0	0	3.15	2.87	82.18	0	39.68	0	3.26	3.68	0	0	6.72	6.4	0	0.74	0.68	0.17	23.33	0	6.47	0	14.17	19.92	21.08	27.36	18.1	17.03
janA	janus A	FBtr0085595	FBgn0001280	682	GO:0008969,GO:0035971,GO:0007548,GO:0005829		0	12.1	0	0	0	0	0	2.07	0	0		11.15	0	0	0	0	0	0	0	0	0	0	0	0	0	0	0	0	0	0	0	0	0	0	0	0	0	81.58	94.81	79.41	79.88	155.21	0
janA	janus A	FBtr0085596	FBgn0001280	679	GO:0008969,GO:0035971,GO:0007548,GO:0005829		0	2.27	0	0	0	0	0	0	0	0		1.22	0	0	0	14.73	0	0	0	0	0	0	0	0	0	0	0	0	0.47	0	71.76	0	4.69	0	0	0	0	1.77	0	0	63.11	2.14	0
janA	janus A	FBtr0085597	FBgn0001280	661	GO:0008969,GO:0035971,GO:0007548,GO:0005829		3.26	0	2.86	114.46	0.18	60.34	0	0	0	0.45		1.23	4.99	0	0	11.18	8.59	0	0	0	0	0	0	0	69.12	0	0	0.79	9.54	0	0	0.58	29.85	0	0	0.21	0	54.67	3.43	0	21.89	7.34	74.88
janB	janus B	FBtr0085598	FBgn0001281	569	GO:0008969,GO:0035971,GO:0007548,GO:0005829		0	0	0	1.13	0	0	0	0	0	0		0.3	0	0	0	0	0.28	0	0	0	0	0	0	0	0	0	0.46	0	0	0	0	0	0.2	0	0	0	0	0	0	0	0	0	0
Jon44E	Jonah 44E	FBtr0088704	FBgn0001285	900	GO:0006508,GO:0004252		0	0	0	0	0	0	0	0	0	0		0	0	0	0	0	0	0	0	0	0	0	0	0	0	0	0	0	0	0	0	0	0	0	0	0	0	0	0	0	0	0	0
Jon44E	Jonah 44E	FBtr0345661	FBgn0001285	1397	GO:0006508,GO:0004252		0	0	0	0	0	0	0	0	0	0		0	0	0	0	0	0	0	0	0	0	0	0	8.32	0	0	0	0	0	0	0	0	0	0	0	0	0	0	0	0	0	0	0
Jra	Jun-related antigen	FBtr0088410	FBgn0001291	1565	GO:0010941,GO:0007391,GO:0005737,GO:0007465,GO:0006909,GO:0000978,GO:0007464,GO:0000790,GO:0009314,GO:0045944,GO:0051726,GO:0008348,GO:0010259,GO:0034097,GO:0000122,GO:0051124,GO:0000165,GO:0051591,GO:0032870,GO:0007254,GO:0008134,GO:0046843,GO:0000981,GO:0042127,GO:0005515,GO:0045597,GO:0009612,GO:0042493,GO:0046844,GO:0046529,GO:0046982,GO:0032496,GO:0005667,GO:0005634,GO:0042060,GO:0045823,GO:…		0	0	0	0	0	0	0	0	0	0		0	0	0.15	0	0	0	0	0	0	1.1	5.97	0.36	0	0	0	0	0	0	0	0	0	0	1.13	0	0.58	0	0	0	0	0	0	2.07
Jra	Jun-related antigen	FBtr0088411	FBgn0001291	1525	GO:0010941,GO:0007391,GO:0005737,GO:0007465,GO:0006909,GO:0000978,GO:0007464,GO:0000790,GO:0009314,GO:0045944,GO:0051726,GO:0008348,GO:0010259,GO:0034097,GO:0000122,GO:0051124,GO:0000165,GO:0051591,GO:0032870,GO:0007254,GO:0008134,GO:0046843,GO:0000981,GO:0042127,GO:0005515,GO:0045597,GO:0009612,GO:0042493,GO:0046844,GO:0046529,GO:0046982,GO:0032496,GO:0005667,GO:0005634,GO:0042060,GO:0045823,GO:…		3.03	8.81	15.86	0.64	0	2.95	7.09	8.9	31.06	7.08		5.27	0.05	0	0	5.68	0.5	0.57	0	0	0	23.57	46.77	7.33	7.37	6.91	2.24	11.17	64.2	0	1.63	0.21	0.03	32.67	0.13	5.52	0	5.12	4.53	2.87	6.8	4.72	8.81
Jra	Jun-related antigen	FBtr0330606	FBgn0001291	1525	GO:0010941,GO:0007391,GO:0005737,GO:0007465,GO:0006909,GO:0000978,GO:0007464,GO:0000790,GO:0009314,GO:0045944,GO:0051726,GO:0008348,GO:0010259,GO:0034097,GO:0000122,GO:0051124,GO:0000165,GO:0051591,GO:0032870,GO:0007254,GO:0008134,GO:0046843,GO:0000981,GO:0042127,GO:0005515,GO:0045597,GO:0009612,GO:0042493,GO:0046844,GO:0046529,GO:0046982,GO:0032496,GO:0005667,GO:0005634,GO:0042060,GO:0045823,GO:…		3.03	8.81	15.86	0.64	0	2.95	7.09	8.9	31.06	7.08		5.27	0.05	0	0	5.68	0.5	0.57	0	0	0	23.57	46.77	7.33	7.37	6.91	2.24	11.17	64.2	0	1.63	0.21	0.03	32.67	0.13	5.52	0	5.12	4.53	2.87	6.8	4.72	8.81
kar	karmoisin	FBtr0082666	FBgn0001296	2176	GO:0005887,GO:0070327,GO:0008028,GO:0006727,GO:0016021,GO:0055085,GO:0015349		0.53	0.97	0.06	0.23	0	0	0.31	0.95	0.24	0.28		2.74	0	0	0	0.31	0.11	0	0.04	1.37	0	0	0	1.14	0.13	0	0	0.05	0	0	0	0	0.35	7.78	0	1.15	0	0.56	4.25	2.2	2.84	0.87	0
kar	karmoisin	FBtr0302563	FBgn0001296	2321	GO:0005887,GO:0070327,GO:0008028,GO:0006727,GO:0016021,GO:0055085,GO:0015349		0.97	0.61	1.6	0	0	0	0	0	0	0		0.26	0	0	0	0.78	0	0.12	0	0	0	2.1	0	0	0	0	0	1.02	0	0	0	0	0	0.12	0	0.67	0	0	0	0	2.5	0	2.41
kay	kayak	FBtr0099988	FBgn0001297	4248	GO:0007391,GO:0005737,GO:0007298,GO:0009611,GO:0007464,GO:0070491,GO:0045944,GO:0045475,GO:0009790,GO:0035220,GO:0003677,GO:0019730,GO:0007163,GO:0043565,GO:0051124,GO:0016330,GO:0031660,GO:0048749,GO:0048813,GO:0007254,GO:0008134,GO:0007297,GO:0000981,GO:0001077,GO:0005515,GO:0003700,GO:0007281,GO:0048085,GO:0046529,GO:0046982,GO:0005667,GO:0005634,GO:0042060,GO:0001736,GO:0048674		0	3.22	0	0	0	0	0	0	0.03	0.05		0.08	0	0.08	0	8.02	0	0.05	0	0	0	3.04	0	11.86	4.3	0	7.5	0.25	9.18	0	0	0	13.9	1.11	0	0.05	0	0	0	0	0	0	0
kay	kayak	FBtr0099989	FBgn0001297	3585	GO:0007391,GO:0005737,GO:0007298,GO:0009611,GO:0007464,GO:0070491,GO:0045944,GO:0045475,GO:0009790,GO:0035220,GO:0003677,GO:0019730,GO:0007163,GO:0043565,GO:0051124,GO:0016330,GO:0031660,GO:0048749,GO:0048813,GO:0007254,GO:0008134,GO:0007297,GO:0000981,GO:0001077,GO:0005515,GO:0003700,GO:0007281,GO:0048085,GO:0046529,GO:0046982,GO:0005667,GO:0005634,GO:0042060,GO:0001736,GO:0048674		6.02	4.2	1.11	4.12	1	0	2.1	4.74	0.09	12.18		3.21	0.99	5.5	1.08	0.69	0.64	0.07	3.51	0	3.72	2.78	0.71	1.2	26.37	0	37.38	1.83	3.1	17.91	0.31	7.25	10.04	37.09	0	12.11	0	0	0	0.17	0.65	0	0.47
kay	kayak	FBtr0099990	FBgn0001297	3194	GO:0007391,GO:0005737,GO:0007298,GO:0009611,GO:0007464,GO:0070491,GO:0045944,GO:0045475,GO:0009790,GO:0035220,GO:0003677,GO:0019730,GO:0007163,GO:0043565,GO:0051124,GO:0016330,GO:0031660,GO:0048749,GO:0048813,GO:0007254,GO:0008134,GO:0007297,GO:0000981,GO:0001077,GO:0005515,GO:0003700,GO:0007281,GO:0048085,GO:0046529,GO:0046982,GO:0005667,GO:0005634,GO:0042060,GO:0001736,GO:0048674		4.13	3.39	3.82	0.24	0	26.4	0.35	3.14	2.24	2.4		4.36	11.67	12.23	8.95	3.04	5.5	2.54	0	11.36	28.78	18.83	29.17	4.9	5.41	19.61	7.11	32.86	0.29	1.75	0.8	1.54	2.57	20.38	0	48.06	37.1	0.65	2.47	0	0	1.48	13.91
kay	kayak	FBtr0290076	FBgn0001297	4574	GO:0007391,GO:0005737,GO:0007298,GO:0009611,GO:0007464,GO:0070491,GO:0045944,GO:0045475,GO:0009790,GO:0035220,GO:0003677,GO:0019730,GO:0007163,GO:0043565,GO:0051124,GO:0016330,GO:0031660,GO:0048749,GO:0048813,GO:0007254,GO:0008134,GO:0007297,GO:0000981,GO:0001077,GO:0005515,GO:0003700,GO:0007281,GO:0048085,GO:0046529,GO:0046982,GO:0005667,GO:0005634,GO:0042060,GO:0001736,GO:0048674		4.76	17.67	26.22	0.43	1.73	2.25	0.3	15.71	4.05	7.25		17.45	32.56	0.79	6.56	2.52	11.96	0	0.82	4.55	0	30.2	5.04	27.22	14.95	28.03	2.96	13.61	2.36	7.92	15.59	12.95	30.5	34.41	100.3	31.85	72.79	2.36	0.21	0	0	0	16.04
kay	kayak	FBtr0339165	FBgn0001297	3738	GO:0007391,GO:0005737,GO:0007298,GO:0009611,GO:0007464,GO:0070491,GO:0045944,GO:0045475,GO:0009790,GO:0035220,GO:0003677,GO:0019730,GO:0007163,GO:0043565,GO:0051124,GO:0016330,GO:0031660,GO:0048749,GO:0048813,GO:0007254,GO:0008134,GO:0007297,GO:0000981,GO:0001077,GO:0005515,GO:0003700,GO:0007281,GO:0048085,GO:0046529,GO:0046982,GO:0005667,GO:0005634,GO:0042060,GO:0001736,GO:0048674		0.16	1.73	0	0	0	0	0	0.65	0	0		0.36	0	0	0	0.82	0	0	0	0	0.85	0	0	0	0	0	0	0	0.78	0	0	2.57	0	0	0	1.73	0	0	0	0	0	0	0
kel	kelch	FBtr0081042	FBgn0001301	5476	GO:0007349,GO:0030036,GO:0030723,GO:0048477,GO:0004842,GO:0045172,GO:0003779,GO:0035324,GO:0007297,GO:0007301,GO:0042787,GO:0035183,GO:0031463,GO:0030717,GO:0007300		13.62	11.36	10.59	1.32	1.14	7.27	5.48	12.22	3.55	9.82		3.05	1.11	5.35	0.35	9.43	22.08	0.99	5.63	6.93	4.55	8.08	17.89	5.15	17.29	0.93	1.52	5.33	4.13	5.21	9.25	7.46	7.75	16.28	4.97	11.96	3.89	0.18	0.72	1.62	1.04	0.96	17.38
kel	kelch	FBtr0081043	FBgn0001301	5476	GO:0007349,GO:0030036,GO:0030723,GO:0048477,GO:0004842,GO:0045172,GO:0003779,GO:0035324,GO:0007297,GO:0007301,GO:0042787,GO:0035183,GO:0031463,GO:0030717,GO:0007300		13.62	11.36	10.59	1.32	1.14	7.27	5.48	12.22	3.55	9.82		3.05	1.11	5.35	0.35	9.43	22.08	0.99	5.63	6.93	4.55	8.08	17.89	5.15	17.29	0.93	1.52	5.33	4.13	5.21	9.25	7.46	7.75	16.28	4.97	11.96	3.89	0.18	0.72	1.62	1.04	0.96	17.38
Khc	Kinesin heavy chain	FBtr0087184	FBgn0001308	3718	GO:0035371,GO:0003774,GO:0005737,GO:0045451,GO:0007097,GO:0008345,GO:0010970,GO:0030011,GO:0048489,GO:0005524,GO:0048812,GO:1904115,GO:0008088,GO:0048813,GO:0007317,GO:0046785,GO:0046843,GO:0007303,GO:0051299,GO:0035617,GO:0007411,GO:0048311,GO:0070868,GO:0008017,GO:0007409,GO:0006886,GO:0030478,GO:0003777,GO:0051012,GO:0007310,GO:0001754,GO:0005523,GO:0008103,GO:0061572,GO:0098957,GO:0008574,GO:…		17.95	24.83	20.33	13.07	0.08	22.3	11.44	25.26	4.46	18.75		20.98	8.11	7.84	11.88	17.83	23.95	11.52	8.49	4.96	61.26	63.68	14.24	5.07	17.85	2.83	0	10.02	25.45	13.01	39.7	32.37	29.12	31.49	3.7	13.9	29.56	11.47	7.77	19.97	15.99	11.51	61.76
kkv	krotzkopf verkehrt	FBtr0078798	FBgn0001311	5457	GO:0007443,GO:0005737,GO:0009611,GO:0045177,GO:0035159,GO:0007430,GO:0071944,GO:0030428,GO:0004100,GO:0006035,GO:0008362,GO:0048085,GO:0006038,GO:0060439,GO:0035158,GO:0006031,GO:0016021,GO:0001838,GO:0007424		0.25	0.04	0.17	0	0.89	0	0	0	0.15	0.09		0.03	0	0	0	0	0.46	0	0	0	0	0.04	0	0.1	0	0	0	0	0.2	0	0	0	0	0.03	0.07	0	0	0	0	0	0	0	0
kkv	krotzkopf verkehrt	FBtr0078800	FBgn0001311	5524	GO:0007443,GO:0005737,GO:0009611,GO:0045177,GO:0035159,GO:0007430,GO:0071944,GO:0030428,GO:0004100,GO:0006035,GO:0008362,GO:0048085,GO:0006038,GO:0060439,GO:0035158,GO:0006031,GO:0016021,GO:0001838,GO:0007424		0	0	0	0.01	0	0	0	0	0.33	0		0	0.07	0	0	0	0	0	0	0	0	0	0	0	0.2	0	0	0	0	0	0.53	0	0	0	0	0.42	0	0	0	0	0	0	0
kkv	krotzkopf verkehrt	FBtr0301398	FBgn0001311	5524	GO:0007443,GO:0005737,GO:0009611,GO:0045177,GO:0035159,GO:0007430,GO:0071944,GO:0030428,GO:0004100,GO:0006035,GO:0008362,GO:0048085,GO:0006038,GO:0060439,GO:0035158,GO:0006031,GO:0016021,GO:0001838,GO:0007424		0	0	0	0.01	0	0	0	0	0.33	0		0	0.07	0	0	0	0	0	0	0	0	0	0	0	0.2	0	0	0	0	0	0.53	0	0	0	0	0.42	0	0	0	0	0	0	0
kl-2	male fertility factor kl2	FBtr0346722	FBgn0001313	13386	GO:0008569,GO:0036159,GO:0036156,GO:0005524,GO:0003341,GO:0045503,GO:0051959,GO:0030286,GO:0045505,GO:0042623		0	0	0	0	0	0	0	0	0	0		0	0	0	0	0	0	0	0	0	0	0	0	0	0	0	0	0	0	0	0	0	0	0	0	0	0	0	0	0	0	0	0
klar	klarsicht	FBtr0072565	FBgn0001316	8706	GO:0034453,GO:0005737,GO:0051647,GO:0005640,GO:0007097,GO:0006869,GO:0035239,GO:0032386,GO:0045855,GO:0040011,GO:0006997,GO:0005881,GO:0005515,GO:0060361,GO:0031887,GO:0048471,GO:0005811,GO:0048085,GO:0005635,GO:0035149,GO:0016021,GO:0001745,GO:0007523,GO:0019894,GO:0061024,GO:0042051		4.2	3.95	0	0.62	0	0	0	1.45	0	0.72		0.74	0	0	0	0	9.21	0	0	0	19.69	0.21	3.68	0	0	0	0	0	0	0	0	2.74	0	0	0	0	0	0	0	0	0	0	0
klar	klarsicht	FBtr0110818	FBgn0001316	8271	GO:0034453,GO:0005737,GO:0051647,GO:0005640,GO:0007097,GO:0006869,GO:0035239,GO:0032386,GO:0045855,GO:0040011,GO:0006997,GO:0005881,GO:0005515,GO:0060361,GO:0031887,GO:0048471,GO:0005811,GO:0048085,GO:0005635,GO:0035149,GO:0016021,GO:0001745,GO:0007523,GO:0019894,GO:0061024,GO:0042051		14.91	19.33	23.28	20.05	10.26	5.14	27.25	4.46	0.8	1.22		4.39	11.42	0	0.72	0.39	3.54	0.53	1.16	1.22	1.48	20.93	1.26	15.75	0	2.03	0	11.44	6.13	24.57	3.68	27.36	0	21.09	21.63	17.64	8.33	0.97	1.71	4.26	3.99	2.3	3.12
klar	klarsicht	FBtr0112807	FBgn0001316	3032	GO:0034453,GO:0005737,GO:0051647,GO:0005640,GO:0007097,GO:0006869,GO:0035239,GO:0032386,GO:0045855,GO:0040011,GO:0006997,GO:0005881,GO:0005515,GO:0060361,GO:0031887,GO:0048471,GO:0005811,GO:0048085,GO:0005635,GO:0035149,GO:0016021,GO:0001745,GO:0007523,GO:0019894,GO:0061024,GO:0042051		3.77	3.28	1.27	17.16	0.28	0.96	25.42	3.2	0	0.12		2.65	0.11	43.42	0	0	0	0	0.51	0	0	0.31	0.25	0.11	5.52	0	0	4.85	0.23	0	0.22	7.82	0.85	2.22	40.69	1.09	0	2.52	0	0	6.6	0	0.26
klar	klarsicht	FBtr0112808	FBgn0001316	6867	GO:0034453,GO:0005737,GO:0051647,GO:0005640,GO:0007097,GO:0006869,GO:0035239,GO:0032386,GO:0045855,GO:0040011,GO:0006997,GO:0005881,GO:0005515,GO:0060361,GO:0031887,GO:0048471,GO:0005811,GO:0048085,GO:0005635,GO:0035149,GO:0016021,GO:0001745,GO:0007523,GO:0019894,GO:0061024,GO:0042051		1.33	0.75	0	0	0	0.15	0.42	2.55	0	5.12		0	1.65	5.01	0	0	0	0	0	10.56	0	0	0.78	1.49	0.47	0	0	0	0.26	3.17	7.03	6.21	4.54	0	0	0	0	0	0	0	0	0	0
klar	klarsicht	FBtr0333850	FBgn0001316	8642	GO:0034453,GO:0005737,GO:0051647,GO:0005640,GO:0007097,GO:0006869,GO:0035239,GO:0032386,GO:0045855,GO:0040011,GO:0006997,GO:0005881,GO:0005515,GO:0060361,GO:0031887,GO:0048471,GO:0005811,GO:0048085,GO:0005635,GO:0035149,GO:0016021,GO:0001745,GO:0007523,GO:0019894,GO:0061024,GO:0042051		5.16	15.85	4.65	0.33	20.66	0	0	3.42	0.45	1.27		0.42	0.04	14.25	0	11.6	0	0.28	4.81	0	0	5.26	0	0.79	0	0.03	0	3.78	0.88	0	11.24	0	1.65	0.21	0	0	1.1	0	0.13	0	0	0	0
klar	klarsicht	FBtr0333851	FBgn0001316	7528	GO:0034453,GO:0005737,GO:0051647,GO:0005640,GO:0007097,GO:0006869,GO:0035239,GO:0032386,GO:0045855,GO:0040011,GO:0006997,GO:0005881,GO:0005515,GO:0060361,GO:0031887,GO:0048471,GO:0005811,GO:0048085,GO:0005635,GO:0035149,GO:0016021,GO:0001745,GO:0007523,GO:0019894,GO:0061024,GO:0042051		27.35	36.3	43.87	2.69	1.96	0	0	1.28	1.76	0.86		0.22	0	0	0.04	0.71	0.09	0	4.42	0	0	0.29	0	0	0	0	0	0.09	0	0	0	0.08	0	0	0	0	0	0	0	0	0	0	2.97
klar	klarsicht	FBtr0333852	FBgn0001316	4934	GO:0034453,GO:0005737,GO:0051647,GO:0005640,GO:0007097,GO:0006869,GO:0035239,GO:0032386,GO:0045855,GO:0040011,GO:0006997,GO:0005881,GO:0005515,GO:0060361,GO:0031887,GO:0048471,GO:0005811,GO:0048085,GO:0005635,GO:0035149,GO:0016021,GO:0001745,GO:0007523,GO:0019894,GO:0061024,GO:0042051		1.24	1.54	1.66	0.19	0.21	0	1.39	0.58	4.72	0.24		0.06	2.07	1.41	0	0	0	0	0.16	0	1.93	2.25	0	0.29	0	0	0	2.46	0.2	0	0	0	0.24	0.45	0.04	0	0	0	0	0	0	0	0
klar	klarsicht	FBtr0343526	FBgn0001316	5689	GO:0034453,GO:0005737,GO:0051647,GO:0005640,GO:0007097,GO:0006869,GO:0035239,GO:0032386,GO:0045855,GO:0040011,GO:0006997,GO:0005881,GO:0005515,GO:0060361,GO:0031887,GO:0048471,GO:0005811,GO:0048085,GO:0005635,GO:0035149,GO:0016021,GO:0001745,GO:0007523,GO:0019894,GO:0061024,GO:0042051		13.43	5.87	5.83	0	0	0.08	1.5	4.13	0	4.29		0	0	0	0	0	0	0	0	0	0	0	0	0.2	8.32	0	0	0	0.6	0	0.06	0	0.06	4.41	0	2.23	0	0	0	0	0	0	0
klar	klarsicht	FBtr0343527	FBgn0001316	2708	GO:0034453,GO:0005737,GO:0051647,GO:0005640,GO:0007097,GO:0006869,GO:0035239,GO:0032386,GO:0045855,GO:0040011,GO:0006997,GO:0005881,GO:0005515,GO:0060361,GO:0031887,GO:0048471,GO:0005811,GO:0048085,GO:0005635,GO:0035149,GO:0016021,GO:0001745,GO:0007523,GO:0019894,GO:0061024,GO:0042051		2.1	0.31	2.45	16.12	67.86	0	0	0	6.01	0.18		0	0.06	1.8	129.91	1.12	3.77	14.13	4.64	0	0	0	0	0	8.43	10.34	5.88	0	0	0	0	0	0	0	0	0	0	0.32	0.39	5.55	6.62	5.05	10.5
kn	knot	FBtr0087465	FBgn0001319	3460	GO:0007474,GO:0035203,GO:0035291,GO:0045944,GO:0010468,GO:0003677,GO:0035288,GO:0009608,GO:0046427,GO:0016204,GO:0035287,GO:0048813,GO:0007526,GO:0007350,GO:0007389,GO:0007367,GO:0048814,GO:0045087,GO:0007476,GO:0042694,GO:0035289,GO:0006355,GO:0001700,GO:0007419		0	0	0	0	0	0	0	0	0	0		0	0	0	0	0	0	0	0	0	0	0	0	0	0	0	0	0	0	0	0	0	0	0.33	0	0	0	0	0	0	0	0	0
kn	knot	FBtr0112809	FBgn0001319	3926	GO:0007474,GO:0035203,GO:0035291,GO:0045944,GO:0010468,GO:0003677,GO:0035288,GO:0009608,GO:0046427,GO:0016204,GO:0035287,GO:0048813,GO:0007526,GO:0007350,GO:0007389,GO:0007367,GO:0048814,GO:0045087,GO:0007476,GO:0042694,GO:0035289,GO:0006355,GO:0001700,GO:0007419		0	0	0	0	0	0	0	0	0	0		3.15	0	0	0	0	0	0	0	0	0	0	0	9.06	0	0.35	0	0	0	0	0	0	0.12	3.7	0	0.2	0	0	0	0	0	0	0
kn	knot	FBtr0112810	FBgn0001319	3339	GO:0007474,GO:0035203,GO:0035291,GO:0045944,GO:0010468,GO:0003677,GO:0035288,GO:0009608,GO:0046427,GO:0016204,GO:0035287,GO:0048813,GO:0007526,GO:0007350,GO:0007389,GO:0007367,GO:0048814,GO:0045087,GO:0007476,GO:0042694,GO:0035289,GO:0006355,GO:0001700,GO:0007419		0	0	0	0	0	0	0	0	0	0		0	0	0	0	0	0	1.44	0	0	0	0	0	0	0	0	0	0	0	0	0	0	0	0	0	0	0.14	0	0	0	0	0	0
kn	knot	FBtr0301400	FBgn0001319	3457	GO:0007474,GO:0035203,GO:0035291,GO:0045944,GO:0010468,GO:0003677,GO:0035288,GO:0009608,GO:0046427,GO:0016204,GO:0035287,GO:0048813,GO:0007526,GO:0007350,GO:0007389,GO:0007367,GO:0048814,GO:0045087,GO:0007476,GO:0042694,GO:0035289,GO:0006355,GO:0001700,GO:0007419		0	0	0	0	0	0	0	0	0	0		0	0	0	0	0	0	0	0	0	0	0	0	0.14	0	0	0	0	0	0	0	0	0	0	0	0	0	0	0	0	0	0	0
kn	knot	FBtr0329882	FBgn0001319	2927	GO:0007474,GO:0035203,GO:0035291,GO:0045944,GO:0010468,GO:0003677,GO:0035288,GO:0009608,GO:0046427,GO:0016204,GO:0035287,GO:0048813,GO:0007526,GO:0007350,GO:0007389,GO:0007367,GO:0048814,GO:0045087,GO:0007476,GO:0042694,GO:0035289,GO:0006355,GO:0001700,GO:0007419		0.07	0	1.33	0	0	0	0	0	0	0.04		0.7	0.05	0	0	0	0	0	0	0	0	0	0	0	0.09	0	0	0	0	0	0	0	0	0	0	0.99	0	0	0	0.11	0	0	0
kni	knirps	FBtr0078283	FBgn0001320	2100	GO:0070491,GO:0008544,GO:0007354,GO:0007088,GO:0000122,GO:0043565,GO:0007517,GO:0048813,GO:0001078,GO:0005515,GO:0003700,GO:0045892,GO:0006355,GO:0035151,GO:0007427,GO:0008270,GO:0005634,GO:0035290,GO:0046845,GO:0007424		0	0	0	0	0	0	0	0	0	0		0	0	0	0	0	0	0	0	0	0	0	0	0	0	0	0	0	0	0	0	0	0	0	0	0	0	0	0	0	0	0	0.13
kni	knirps	FBtr0344836	FBgn0001320	1911	GO:0070491,GO:0008544,GO:0007354,GO:0007088,GO:0000122,GO:0043565,GO:0007517,GO:0048813,GO:0001078,GO:0005515,GO:0003700,GO:0045892,GO:0006355,GO:0035151,GO:0007427,GO:0008270,GO:0005634,GO:0035290,GO:0046845,GO:0007424		0	0	0	0	0	0	0	0	0	0		0.16	0	0	0	0	0	0	0	0	0	0	0	0	0	0	3.5	0	0	0	0	0	0	0	0	0	0	0	0	0	0	0	0
knk	knickkopf	FBtr0082194	FBgn0001321	2674	GO:0008293,GO:0007362,GO:0006035,GO:0008362,GO:0035158,GO:0035151,GO:0006031,GO:0035152,GO:0040003,GO:0001838,GO:0007424		0.69	0.49	0.71	0.18	0	0	7.64	0.17	0	0.54		0.56	0	0	0	14.76	0	0	0.83	0	0	0.52	0	0.72	0.78	0	0	0	0	0	0.04	0	0	0.03	0	0	0	0	0	0	0	0	0
knrl	knirps-like	FBtr0078212	FBgn0001323	3909	GO:0007088,GO:0043565,GO:0003700,GO:0045892,GO:0035151,GO:0007427,GO:0008270,GO:0005634,GO:0046845,GO:0007424		0	0	0	0	0	0	0	0	0	0		0	0	0	0	0	0	0	0	0	0	0	0	0	0	0	0	0	0	0	0	0	0	0	0	0	0	0	0	0	0	0	11.97
knrl	knirps-like	FBtr0346815	FBgn0001323	2925	GO:0007088,GO:0043565,GO:0003700,GO:0045892,GO:0035151,GO:0007427,GO:0008270,GO:0005634,GO:0046845,GO:0007424		0	0	0	0	0	0	0	0	0	0		0	0	0	0	0	0	0	0	0	0	0	0	0	0	0	0	0	0	0	0	0	0	0	0	0	0	0	0	0	0	0	0.42
kto	kohtalo	FBtr0074884	FBgn0001324	7740	GO:0007406,GO:0070847,GO:0048749,GO:0001104,GO:0022416,GO:0036011,GO:0005700,GO:0005515,GO:0001105,GO:0035072,GO:0006367,GO:0045498,GO:0006357,GO:0016592,GO:0030177		8.08	9.32	6.44	5.07	0.8	1.77	5.39	8.31	4.14	9.77		1.67	1.22	0.56	14.85	4.03	25.22	0.02	1.36	1.83	0.85	6.8	5.64	0	1	0	20.07	0.98	7.93	11.13	5.84	2.75	4.83	0.03	0	0.88	0.5	0	0.15	0	0	0.06	0.07
kto	kohtalo	FBtr0304716	FBgn0001324	1723	GO:0007406,GO:0070847,GO:0048749,GO:0001104,GO:0022416,GO:0036011,GO:0005700,GO:0005515,GO:0001105,GO:0035072,GO:0006367,GO:0045498,GO:0006357,GO:0016592,GO:0030177		0	0	0	0.5	1.97	0	0	0	0	1.09		0	0	11.01	0	5.96	0	0.06	0	0	7.67	0	0	2.22	0.52	0	0	0	0	0	0	71.42	0	3.93	0	0	0	0	1.7	0.38	5.77	0.85	28.37
Kr	Kruppel	FBtr0072449	FBgn0001325	2536	GO:0007443,GO:0007400,GO:0003705,GO:0035220,GO:0007354,GO:0040034,GO:0061332,GO:0000122,GO:0007402,GO:0043565,GO:0048749,GO:0007517,GO:0000981,GO:0010906,GO:0003700,GO:0007411,GO:0045892,GO:0006342,GO:0010629,GO:0035206,GO:0005634,GO:0035290,GO:0007419		0.93	0	0	0	0	0	0	0	1.37	0		0.4	0	0	0	0	0.19	0	0	0	0	0.05	0	0	0.06	0	0	0.35	0	0	0	0	0.04	0	0	0	0	0	0	0	0	0	0
Kr	Kruppel	FBtr0333162	FBgn0001325	4411	GO:0007443,GO:0007400,GO:0003705,GO:0035220,GO:0007354,GO:0040034,GO:0061332,GO:0000122,GO:0007402,GO:0043565,GO:0048749,GO:0007517,GO:0000981,GO:0010906,GO:0003700,GO:0007411,GO:0045892,GO:0006342,GO:0010629,GO:0035206,GO:0005634,GO:0035290,GO:0007419		0	0.14	0	0	0	0	0.93	0.39	0	1.75		0.15	3.07	0	0	0	0	0	0	0	0	0	0.32	2.45	0	0	0	0	0	0	0	0	0	0.26	0	1	0	0	0	0	0	0	0
kz	kurz	FBtr0070419	FBgn0001330	3927	GO:0005737,GO:0006396,GO:0005524,GO:0005730,GO:0004004,GO:0003723,GO:0004386		0	0	1.1	0.03	0	0.84	0.06	0	0	0		0.5	0	0	0	0	0.25	0	0.27	0	0	0	0	0.33	0	0	0	0.6	1.94	0	0	0	0	0	0	0	0	0	0	0.33	0	0.27	0.5
kz	kurz	FBtr0342769	FBgn0001330	3741	GO:0005737,GO:0006396,GO:0005524,GO:0005730,GO:0004004,GO:0003723,GO:0004386		0.75	1.08	0	0	0	0	0	2.52	0.32	2.43		0	0	0	0	1.18	0	3.36	0	0	0	0	1.32	0	0	0.03	0	0	0	0	0	1.42	0	0	0	0	0	1.23	0	0	0	0	0
l(1)1Bi	lethal (1) 1Bi	FBtr0070119	FBgn0001341	3680	GO:0003887,GO:0003677,GO:0006351		7.25	6.61	5.39	0	39.91	0.55	6.14	5.13	4.59	1.21		0.76	14.85	0	0	9.03	36.01	3.87	0	0	0.15	0	0	12.45	0	0.03	27.64	0	3.77	0.07	0.24	13.68	1.23	0.97	0	1.15	0.06	2.19	0	0	6.36	0	3.56
egh	egghead	FBtr0070439	FBgn0001404	3595	GO:0016325,GO:0005737,GO:0048935,GO:0030720,GO:0033227,GO:0007299,GO:0019187,GO:0016333,GO:0046662,GO:0042248,GO:0006688,GO:0007293,GO:0045434,GO:0016021,GO:0045165,GO:0030707,GO:0007298,GO:0001744,GO:0007411,GO:0007281,GO:0008049		72.17	70.22	72.8	11.41	1.14	22.69	8.87	53.11	59.19	75.19		21.5	4.39	162.59	17.72	45.44	11.86	212.77	60.64	140.11	91.88	44.44	42.56	84.14	31.94	8.28	71.82	77.47	7.57	62.45	9.65	46.09	31.69	79.58	1.7	28.61	141.12	20.21	6.89	13.56	11.85	9.6	19.32
egh	egghead	FBtr0070440	FBgn0001404	3303	GO:0016325,GO:0005737,GO:0048935,GO:0030720,GO:0033227,GO:0007299,GO:0019187,GO:0016333,GO:0046662,GO:0042248,GO:0006688,GO:0007293,GO:0045434,GO:0016021,GO:0045165,GO:0030707,GO:0007298,GO:0001744,GO:0007411,GO:0007281,GO:0008049		158.06	223.39	175.47	243.17	292.9	372.64	145.05	256.98	116.86	180.69		43.96	65.94	186.82	317.92	126.59	210.21	44.51	156.19	58.18	36.27	91.29	102.73	182.59	241.3	425.69	37.92	145.37	91.64	97.26	79.35	73.67	70.42	223.33	255.95	116.3	537.49	27.65	9.12	20.96	16.73	20.35	133.24
egh	egghead	FBtr0340091	FBgn0001404	2946	GO:0016325,GO:0005737,GO:0048935,GO:0030720,GO:0033227,GO:0007299,GO:0019187,GO:0016333,GO:0046662,GO:0042248,GO:0006688,GO:0007293,GO:0045434,GO:0016021,GO:0045165,GO:0030707,GO:0007298,GO:0001744,GO:0007411,GO:0007281,GO:0008049		0	0.71	3.95	0	0	37.72	0	0	0.19	0.19		0.23	0.3	0	0	0.56	0	0	0	0	0	0	0	0	0	0	0	0	1.1	0	0	0	0	0	51.16	3.65	0	0	0	0	0	0	0
l(1)10Bb	lethal (1) 10Bb	FBtr0073460	FBgn0001491	934	GO:0003674,GO:0071013,GO:0071011,GO:0000398		6.08	4.2	6.73	1.31	1.85	0	0.27	1.76	18.38	8.11		7.38	0	0	0	0	6.04	2.16	0	17.84	1.66	33.52	4.52	2.74	25.55	0	10.55	2.47	2.88	2.22	0.54	0.5	9.89	26.92	0	3.98	0	18.07	31.24	22.14	33.78	35.09	17.5
Hlc	Helicase	FBtr0077221	FBgn0001565	2116	GO:0005737,GO:0006364,GO:0005524,GO:0005730,GO:0003676,GO:0004004,GO:0010501		7.57	0.66	13.83	0	10.02	1.6	0	23.09	1.42	0		5.17	0	0	0	3.05	0	0	0	0	0	5.13	3.98	12.12	1.01	0	0	0.59	0	0	0	0	0.61	0	0	18.47	0	3.44	3.85	2.42	0	0	0
Hlc	Helicase	FBtr0343853	FBgn0001565	1963	GO:0005737,GO:0006364,GO:0005524,GO:0005730,GO:0003676,GO:0004004,GO:0010501		4.33	8.78	7.02	19.55	0	17.23	0.4	0.06	2.02	15.3		13.55	0.64	23.18	1.41	0	1.02	0	5.61	5.65	2.09	0	0	0	0	6.59	0	4.05	19.79	0.06	28.5	11.91	19.35	4.53	0	0	21.61	13.41	11.57	0	8.06	3.13	10.89
Grip91	Gamma-tubulin ring protein 91	FBtr0073841	FBgn0001612	3571	GO:0051011,GO:0007140,GO:0000922,GO:0051298,GO:0000212,GO:0005875,GO:0007020,GO:0090307,GO:0043015,GO:0072686,GO:0000923,GO:0008017,GO:0007017,GO:0031122,GO:0005813,GO:0005200,GO:0008275,GO:0051415		9.96	8.92	5.95	1.87	14.06	4.31	3.03	10.24	20.56	6.83		2.33	0.22	0	0	10.67	15.66	67.5	11.4	0.32	0.9	9.07	5.42	1.16	5.37	0.38	5.07	1.67	2.1	26.29	5.17	2.34	8.45	8.05	0	12.3	0	0.24	1.55	2.55	0.1	3.36	0
dlg1	discs large 1	FBtr0073483	FBgn0001624	2554	GO:0000132,GO:0001738,GO:0016020,GO:0007391,GO:0061176,GO:0030714,GO:0071212,GO:0008285,GO:0061689,GO:0097120,GO:0008105,GO:0045167,GO:0014069,GO:0016336,GO:0019991,GO:0046956,GO:0001708,GO:0030710,GO:0045475,GO:0008104,GO:0051726,GO:0045197,GO:0007399,GO:0016332,GO:0000122,GO:0051294,GO:0060581,GO:0016328,GO:0051124,GO:0005886,GO:0016333,GO:0048149,GO:0008593,GO:0043113,GO:0043195,GO:0045175,GO:…		0	0	0	0	6.9	0	9.93	3.07	0	0		0	0	68.34	0	0	0	0	0	1.07	0	0	0	3.14	6.67	0	0	21.84	2.88	1.31	0	0	3.33	4.79	0	0	9.05	0	0	0	0	0	0
dlg1	discs large 1	FBtr0073484	FBgn0001624	2554	GO:0000132,GO:0001738,GO:0016020,GO:0007391,GO:0061176,GO:0030714,GO:0071212,GO:0008285,GO:0061689,GO:0097120,GO:0008105,GO:0045167,GO:0014069,GO:0016336,GO:0019991,GO:0046956,GO:0001708,GO:0030710,GO:0045475,GO:0008104,GO:0051726,GO:0045197,GO:0007399,GO:0016332,GO:0000122,GO:0051294,GO:0060581,GO:0016328,GO:0051124,GO:0005886,GO:0016333,GO:0048149,GO:0008593,GO:0043113,GO:0043195,GO:0045175,GO:…		0	0	0.55	0	17.58	1.31	1.53	0	0.47	1.02		0.28	0	9.55	1.29	0	0	0	0.04	0.16	0	2.82	0.61	0.29	2.03	0.73	0	0.95	0.17	0.39	0	0.52	0.21	0.3	0	0.62	0.3	0	0	0	0	2.36	0.25
dlg1	discs large 1	FBtr0073485	FBgn0001624	4848	GO:0000132,GO:0001738,GO:0016020,GO:0007391,GO:0061176,GO:0030714,GO:0071212,GO:0008285,GO:0061689,GO:0097120,GO:0008105,GO:0045167,GO:0014069,GO:0016336,GO:0019991,GO:0046956,GO:0001708,GO:0030710,GO:0045475,GO:0008104,GO:0051726,GO:0045197,GO:0007399,GO:0016332,GO:0000122,GO:0051294,GO:0060581,GO:0016328,GO:0051124,GO:0005886,GO:0016333,GO:0048149,GO:0008593,GO:0043113,GO:0043195,GO:0045175,GO:…		0	0	0	0	0	0.27	0.46	0	0	0		0	0	0	0	0	0	0	0	0	0	0	0	0	0	0	0	0.36	0	0	0	0	0.37	0	0	0.13	0	0	0	0	0	0	0
dlg1	discs large 1	FBtr0073486	FBgn0001624	4865	GO:0000132,GO:0001738,GO:0016020,GO:0007391,GO:0061176,GO:0030714,GO:0071212,GO:0008285,GO:0061689,GO:0097120,GO:0008105,GO:0045167,GO:0014069,GO:0016336,GO:0019991,GO:0046956,GO:0001708,GO:0030710,GO:0045475,GO:0008104,GO:0051726,GO:0045197,GO:0007399,GO:0016332,GO:0000122,GO:0051294,GO:0060581,GO:0016328,GO:0051124,GO:0005886,GO:0016333,GO:0048149,GO:0008593,GO:0043113,GO:0043195,GO:0045175,GO:…		0	0	0	0	0	0	0	0	0	0		0	0	0	0	0	0	0	0	0	0	0	0	0	0	0	0	0	0	0	0	0	0	0	0	0	0	0	0	0	0	0	0
dlg1	discs large 1	FBtr0073487	FBgn0001624	4709	GO:0000132,GO:0001738,GO:0016020,GO:0007391,GO:0061176,GO:0030714,GO:0071212,GO:0008285,GO:0061689,GO:0097120,GO:0008105,GO:0045167,GO:0014069,GO:0016336,GO:0019991,GO:0046956,GO:0001708,GO:0030710,GO:0045475,GO:0008104,GO:0051726,GO:0045197,GO:0007399,GO:0016332,GO:0000122,GO:0051294,GO:0060581,GO:0016328,GO:0051124,GO:0005886,GO:0016333,GO:0048149,GO:0008593,GO:0043113,GO:0043195,GO:0045175,GO:…		2.53	26.09	0	0	0	0	0	0	4.86	10.08		0	0	0	0	14.19	0	0	0	0	0	0	0	0	0	0	0	0	0	8.8	26.56	4.36	0	0	0	0	0	0	0	0	0	0	0
dlg1	discs large 1	FBtr0073488	FBgn0001624	5296	GO:0000132,GO:0001738,GO:0016020,GO:0007391,GO:0061176,GO:0030714,GO:0071212,GO:0008285,GO:0061689,GO:0097120,GO:0008105,GO:0045167,GO:0014069,GO:0016336,GO:0019991,GO:0046956,GO:0001708,GO:0030710,GO:0045475,GO:0008104,GO:0051726,GO:0045197,GO:0007399,GO:0016332,GO:0000122,GO:0051294,GO:0060581,GO:0016328,GO:0051124,GO:0005886,GO:0016333,GO:0048149,GO:0008593,GO:0043113,GO:0043195,GO:0045175,GO:…		84.03	81.76	109.1	131.92	55.77	168.06	125.59	154.8	87.89	81.68		4.44	13.05	0	163.2	46.5	19.12	3.53	40.96	1.51	0.71	18.94	2.92	9.62	91.61	230.53	12.81	12.82	54.13	27.38	47.83	35.87	52.75	40.43	5.18	107.96	17.27	0	0	0	3.66	0	45.65
dlg1	discs large 1	FBtr0073489	FBgn0001624	4893	GO:0000132,GO:0001738,GO:0016020,GO:0007391,GO:0061176,GO:0030714,GO:0071212,GO:0008285,GO:0061689,GO:0097120,GO:0008105,GO:0045167,GO:0014069,GO:0016336,GO:0019991,GO:0046956,GO:0001708,GO:0030710,GO:0045475,GO:0008104,GO:0051726,GO:0045197,GO:0007399,GO:0016332,GO:0000122,GO:0051294,GO:0060581,GO:0016328,GO:0051124,GO:0005886,GO:0016333,GO:0048149,GO:0008593,GO:0043113,GO:0043195,GO:0045175,GO:…		0	0	0	0	0	0	0	0	0	0		0	0	0	0	0	0	0	0	0	0	0	0	0	0	0	0	0	0	0	0	0	0	0	0	0	0	0	0	0	0	0	0
dlg1	discs large 1	FBtr0073490	FBgn0001624	5119	GO:0000132,GO:0001738,GO:0016020,GO:0007391,GO:0061176,GO:0030714,GO:0071212,GO:0008285,GO:0061689,GO:0097120,GO:0008105,GO:0045167,GO:0014069,GO:0016336,GO:0019991,GO:0046956,GO:0001708,GO:0030710,GO:0045475,GO:0008104,GO:0051726,GO:0045197,GO:0007399,GO:0016332,GO:0000122,GO:0051294,GO:0060581,GO:0016328,GO:0051124,GO:0005886,GO:0016333,GO:0048149,GO:0008593,GO:0043113,GO:0043195,GO:0045175,GO:…		1.86	10.57	0	0	0	24.22	0	0	2.12	5.03		19.74	0	0	0	35.71	30.99	0	64.56	0	0	0	0	43.59	22.87	0	0	0	25.28	26.13	30.3	55.37	0	6.76	127.97	0.02	269	0	0	0	0	0	32.82
dlg1	discs large 1	FBtr0073491	FBgn0001624	2114	GO:0000132,GO:0001738,GO:0016020,GO:0007391,GO:0061176,GO:0030714,GO:0071212,GO:0008285,GO:0061689,GO:0097120,GO:0008105,GO:0045167,GO:0014069,GO:0016336,GO:0019991,GO:0046956,GO:0001708,GO:0030710,GO:0045475,GO:0008104,GO:0051726,GO:0045197,GO:0007399,GO:0016332,GO:0000122,GO:0051294,GO:0060581,GO:0016328,GO:0051124,GO:0005886,GO:0016333,GO:0048149,GO:0008593,GO:0043113,GO:0043195,GO:0045175,GO:…		2.16	1.34	3.79	2.56	0	0	0	0.39	0	0		0	0	0	0	1.89	0	0	0	0	0	0	0	0	0	0	0	3.82	0	0	0	0	0	0	0	0.23	0	0	0	0	0	0	0
dlg1	discs large 1	FBtr0073492	FBgn0001624	2102	GO:0000132,GO:0001738,GO:0016020,GO:0007391,GO:0061176,GO:0030714,GO:0071212,GO:0008285,GO:0061689,GO:0097120,GO:0008105,GO:0045167,GO:0014069,GO:0016336,GO:0019991,GO:0046956,GO:0001708,GO:0030710,GO:0045475,GO:0008104,GO:0051726,GO:0045197,GO:0007399,GO:0016332,GO:0000122,GO:0051294,GO:0060581,GO:0016328,GO:0051124,GO:0005886,GO:0016333,GO:0048149,GO:0008593,GO:0043113,GO:0043195,GO:0045175,GO:…		0.42	1.7	0	0.18	0	0	0	0.38	4.22	0.83		0	0	0	2.89	28.74	5.17	0	0.61	0	0	0	0	0	0	0	0	0	0	0	0	2.75	0	0	0	0	0	0	0	0	0	0	0
dlg1	discs large 1	FBtr0112812	FBgn0001624	6554	GO:0000132,GO:0001738,GO:0016020,GO:0007391,GO:0061176,GO:0030714,GO:0071212,GO:0008285,GO:0061689,GO:0097120,GO:0008105,GO:0045167,GO:0014069,GO:0016336,GO:0019991,GO:0046956,GO:0001708,GO:0030710,GO:0045475,GO:0008104,GO:0051726,GO:0045197,GO:0007399,GO:0016332,GO:0000122,GO:0051294,GO:0060581,GO:0016328,GO:0051124,GO:0005886,GO:0016333,GO:0048149,GO:0008593,GO:0043113,GO:0043195,GO:0045175,GO:…		4.81	9.04	5.23	1.9	0.7	0	0.06	2.89	11.89	1.17		3.43	5.33	0	0	24.97	1.66	72.51	7.97	0	12.88	11.52	5.91	0.15	17.9	0	0	4.4	11.58	27.4	0.74	5.63	3.19	7.71	31.25	18.1	1.53	0	0	0.52	0	0.55	0.51
dlg1	discs large 1	FBtr0112813	FBgn0001624	7249	GO:0000132,GO:0001738,GO:0016020,GO:0007391,GO:0061176,GO:0030714,GO:0071212,GO:0008285,GO:0061689,GO:0097120,GO:0008105,GO:0045167,GO:0014069,GO:0016336,GO:0019991,GO:0046956,GO:0001708,GO:0030710,GO:0045475,GO:0008104,GO:0051726,GO:0045197,GO:0007399,GO:0016332,GO:0000122,GO:0051294,GO:0060581,GO:0016328,GO:0051124,GO:0005886,GO:0016333,GO:0048149,GO:0008593,GO:0043113,GO:0043195,GO:0045175,GO:…		64.23	79.55	57.12	136.02	9.86	136.4	136.43	43.43	47.96	49.68		10.02	136.32	266.15	620.66	22.51	40.13	46.07	47.91	124.4	99.7	143.28	121.6	62.83	170.88	203.7	73.82	47.56	14.8	2.81	44.75	24.32	7.55	54.08	151.53	142.88	370.87	24.78	16.68	15.82	25.22	29.09	163.63
dlg1	discs large 1	FBtr0301288	FBgn0001624	3196	GO:0000132,GO:0001738,GO:0016020,GO:0007391,GO:0061176,GO:0030714,GO:0071212,GO:0008285,GO:0061689,GO:0097120,GO:0008105,GO:0045167,GO:0014069,GO:0016336,GO:0019991,GO:0046956,GO:0001708,GO:0030710,GO:0045475,GO:0008104,GO:0051726,GO:0045197,GO:0007399,GO:0016332,GO:0000122,GO:0051294,GO:0060581,GO:0016328,GO:0051124,GO:0005886,GO:0016333,GO:0048149,GO:0008593,GO:0043113,GO:0043195,GO:0045175,GO:…		2.28	1.31	0.9	1.54	0.08	0.48	0.96	0.82	0	0.22		0	0	0	0	0.39	0.77	0	0	0	0	0	0	0	0	0	0	0	0.27	0	0.17	0	0	0	0	0	0	0.56	0	0	0.78	0.23	0
dlg1	discs large 1	FBtr0301289	FBgn0001624	4841	GO:0000132,GO:0001738,GO:0016020,GO:0007391,GO:0061176,GO:0030714,GO:0071212,GO:0008285,GO:0061689,GO:0097120,GO:0008105,GO:0045167,GO:0014069,GO:0016336,GO:0019991,GO:0046956,GO:0001708,GO:0030710,GO:0045475,GO:0008104,GO:0051726,GO:0045197,GO:0007399,GO:0016332,GO:0000122,GO:0051294,GO:0060581,GO:0016328,GO:0051124,GO:0005886,GO:0016333,GO:0048149,GO:0008593,GO:0043113,GO:0043195,GO:0045175,GO:…		0	0	0	0	0	0	0	0	65.25	0		0.24	0	0	0	5.92	0	0	0	0	0	0	0	0	0	0	0	0	0.6	0	0	0.01	0	0	0	0	0	0	0	0	0	0	0
dlg1	discs large 1	FBtr0302114	FBgn0001624	2363	GO:0000132,GO:0001738,GO:0016020,GO:0007391,GO:0061176,GO:0030714,GO:0071212,GO:0008285,GO:0061689,GO:0097120,GO:0008105,GO:0045167,GO:0014069,GO:0016336,GO:0019991,GO:0046956,GO:0001708,GO:0030710,GO:0045475,GO:0008104,GO:0051726,GO:0045197,GO:0007399,GO:0016332,GO:0000122,GO:0051294,GO:0060581,GO:0016328,GO:0051124,GO:0005886,GO:0016333,GO:0048149,GO:0008593,GO:0043113,GO:0043195,GO:0045175,GO:…		0.96	0.62	3.04	5.2	3.91	6.61	13.64	10.04	8.06	0.91		1.11	0.15	4.99	0.84	1.62	5.45	1.44	0	0	0.21	18.08	7.38	3.07	7.08	6.74	0	1.43	0.65	0	6.26	3.7	1.14	6.95	26.91	11.47	0	0	0	0	0	0	0.24
dlg1	discs large 1	FBtr0308088	FBgn0001624	4841	GO:0000132,GO:0001738,GO:0016020,GO:0007391,GO:0061176,GO:0030714,GO:0071212,GO:0008285,GO:0061689,GO:0097120,GO:0008105,GO:0045167,GO:0014069,GO:0016336,GO:0019991,GO:0046956,GO:0001708,GO:0030710,GO:0045475,GO:0008104,GO:0051726,GO:0045197,GO:0007399,GO:0016332,GO:0000122,GO:0051294,GO:0060581,GO:0016328,GO:0051124,GO:0005886,GO:0016333,GO:0048149,GO:0008593,GO:0043113,GO:0043195,GO:0045175,GO:…		36.31	30.26	5.86	10.81	100.37	2.04	0	20.29	0	27.88		3.45	0	0	17.2	0	0	0	8.62	0	0	0	0	27.08	10.7	184.74	30.65	9.46	17.36	0	0	0	6.35	42.73	0	0	0	0	0	0	0	0	23.54
dlg1	discs large 1	FBtr0308089	FBgn0001624	5341	GO:0000132,GO:0001738,GO:0016020,GO:0007391,GO:0061176,GO:0030714,GO:0071212,GO:0008285,GO:0061689,GO:0097120,GO:0008105,GO:0045167,GO:0014069,GO:0016336,GO:0019991,GO:0046956,GO:0001708,GO:0030710,GO:0045475,GO:0008104,GO:0051726,GO:0045197,GO:0007399,GO:0016332,GO:0000122,GO:0051294,GO:0060581,GO:0016328,GO:0051124,GO:0005886,GO:0016333,GO:0048149,GO:0008593,GO:0043113,GO:0043195,GO:0045175,GO:…		0	6.69	3.54	25.32	0	0	0	0	0	0		0	0	0	0	0	0	0	0	0	0	0	0	0	0	51.14	26.96	0	18.99	0	0	0	0	8.25	4.42	0	22.61	0	0	0	0	0	22.55
dlg1	discs large 1	FBtr0330390	FBgn0001624	4848	GO:0000132,GO:0001738,GO:0016020,GO:0007391,GO:0061176,GO:0030714,GO:0071212,GO:0008285,GO:0061689,GO:0097120,GO:0008105,GO:0045167,GO:0014069,GO:0016336,GO:0019991,GO:0046956,GO:0001708,GO:0030710,GO:0045475,GO:0008104,GO:0051726,GO:0045197,GO:0007399,GO:0016332,GO:0000122,GO:0051294,GO:0060581,GO:0016328,GO:0051124,GO:0005886,GO:0016333,GO:0048149,GO:0008593,GO:0043113,GO:0043195,GO:0045175,GO:…		0	0	0	0	0	0.27	0.46	0	0	0		0	0	0	0	0	0	0	0	0	0	0	0	0	0	0	0	0.36	0	0	0	0	0.37	0	0	0.13	0	0	0	0	0	0	0
dlg1	discs large 1	FBtr0333261	FBgn0001624	5380	GO:0000132,GO:0001738,GO:0016020,GO:0007391,GO:0061176,GO:0030714,GO:0071212,GO:0008285,GO:0061689,GO:0097120,GO:0008105,GO:0045167,GO:0014069,GO:0016336,GO:0019991,GO:0046956,GO:0001708,GO:0030710,GO:0045475,GO:0008104,GO:0051726,GO:0045197,GO:0007399,GO:0016332,GO:0000122,GO:0051294,GO:0060581,GO:0016328,GO:0051124,GO:0005886,GO:0016333,GO:0048149,GO:0008593,GO:0043113,GO:0043195,GO:0045175,GO:…		0	2.63	0	0	0	0	0	0	0	0		1.06	0	0	0	0	0	0	0	0	0	0	0	0	2.22	0	0	0	0	0	0	0	0	4.06	0	0	38.89	0	0	0	0	0	0
dlg1	discs large 1	FBtr0333262	FBgn0001624	6815	GO:0000132,GO:0001738,GO:0016020,GO:0007391,GO:0061176,GO:0030714,GO:0071212,GO:0008285,GO:0061689,GO:0097120,GO:0008105,GO:0045167,GO:0014069,GO:0016336,GO:0019991,GO:0046956,GO:0001708,GO:0030710,GO:0045475,GO:0008104,GO:0051726,GO:0045197,GO:0007399,GO:0016332,GO:0000122,GO:0051294,GO:0060581,GO:0016328,GO:0051124,GO:0005886,GO:0016333,GO:0048149,GO:0008593,GO:0043113,GO:0043195,GO:0045175,GO:…		22.44	20.81	58.36	19.85	149.94	10.82	30.56	91.33	0	78.58		5.75	2.34	395.39	122.49	48.94	97.48	4.96	2.42	13.83	0	36.09	26.78	7.02	0.44	0	1.81	23.96	17.15	60.72	0	5.31	17.1	48.03	0	11.48	3.55	0	0	0	0.31	0.17	0
dlg1	discs large 1	FBtr0333263	FBgn0001624	2524	GO:0000132,GO:0001738,GO:0016020,GO:0007391,GO:0061176,GO:0030714,GO:0071212,GO:0008285,GO:0061689,GO:0097120,GO:0008105,GO:0045167,GO:0014069,GO:0016336,GO:0019991,GO:0046956,GO:0001708,GO:0030710,GO:0045475,GO:0008104,GO:0051726,GO:0045197,GO:0007399,GO:0016332,GO:0000122,GO:0051294,GO:0060581,GO:0016328,GO:0051124,GO:0005886,GO:0016333,GO:0048149,GO:0008593,GO:0043113,GO:0043195,GO:0045175,GO:…		0	0	0	0	41.18	0	82.27	0	17.93	0		0	0	0	0	0	0	0	0	0	0	3.8	0	0	0	0	0	0	0	0	0	0	0	0	0	0	0	4	22.28	18.25	0	4.09	0
ifc	infertile crescent	FBtr0079179	FBgn0001941	1784	GO:0045494,GO:0005739,GO:0005886,GO:0070938,GO:0016006,GO:0007053,GO:0042284,GO:0007283,GO:0007602,GO:0016021,GO:0046513		29.63	19.33	18.54	10.96	0	5.02	18.86	16.27	11.22	8.89		14.92	0	6.8	0.13	21.97	5.4	1.02	0.08	0	30.85	13.74	13.28	1.26	18.42	0	7.42	36.05	4.17	0	9.72	0	7.62	10.65	7.14	28.47	0	0	0	0	0	0	0
ifc	infertile crescent	FBtr0332599	FBgn0001941	1656	GO:0045494,GO:0005739,GO:0005886,GO:0070938,GO:0016006,GO:0007053,GO:0042284,GO:0007283,GO:0007602,GO:0016021,GO:0046513		2.31	0.94	0.65	10.16	14.58	36.78	6.4	3.09	0	8.9		2.19	2.29	85.44	0	0	1.11	8.03	12.51	0.16	9.95	8.98	0	2.04	72.86	70.44	77.65	0.53	1.15	6.81	0	2.48	5.97	0.36	22.75	10.66	0.88	0.38	0.86	11.63	0.45	0.95	0.66
eIF4A	eukaryotic translation initiation factor 4A	FBtr0079175	FBgn0001942	1691	GO:0000381,GO:0048132,GO:0003743,GO:0006413,GO:0016281,GO:0000278,GO:0005524,GO:0048477,GO:0005730,GO:0007279,GO:0003724,GO:0003676,GO:0007446,GO:0043186,GO:0004004,GO:0010501,GO:0005829,GO:0030718,GO:0006974,GO:0005634,GO:0002168		331.34	370.38	293.95	219.91	41.47	375.03	191.55	329.55	228.9	229.47		158.63	0	43.41	0	170.05	110.26	69.08	68.04	68.43	44.55	0	125.91	121.89	74.06	355.24	13.45	58.31	131.26	62.06	94.17	183.65	187.58	145.56	234.42	216.4	111.9	80.03	61.03	98.93	178.1	58.17	264.16
eIF4A	eukaryotic translation initiation factor 4A	FBtr0079176	FBgn0001942	1553	GO:0000381,GO:0048132,GO:0003743,GO:0006413,GO:0016281,GO:0000278,GO:0005524,GO:0048477,GO:0005730,GO:0007279,GO:0003724,GO:0003676,GO:0007446,GO:0043186,GO:0004004,GO:0010501,GO:0005829,GO:0030718,GO:0006974,GO:0005634,GO:0002168		24.34	14.89	35.62	125.46	0	0	63.85	15.02	0	14.47		22.12	19.17	0.32	5.2	12.94	5.52	8.1	4.42	10.19	17.36	0	69.31	28.71	0	22.92	12.22	72.61	19	0	15.69	7.95	22.24	26.47	9.24	49.13	43.87	1.6	52.86	7.49	77.52	2.55	61.58
[truncated: 33,519 more rows]
[truncated: 13 more columns]
