# Supplementary material for: Nitric oxide acts as a cotransmitter in a subset of dopaminergic neurons to diversify memory dynamics
Source: eLife. 2019 Nov 14;8:e49257. doi: 10.7554/eLife.49257 (PMC6948953; doi:10.7554/eLife.49257)
Supplement: Supplementary file 1. — Transcripts Per Kilobase Million (TPM) TPM values for each splicing isoform are listed with the corresponding FlyBase ID. The source data is available at NCBI Gene Expression Omnibus (accession number GSE139889). [file elife-49257-supp1.xlsx]

## Sheet: merged_template
										Driver Line	MB623C	MB623C	MB623C	MB005C	MB005C	MB005C	MB005C	MB008C	MB008C	MB008C	SS01248	SS01248	MB315C	MB315C	MB315C	MB315C	MB296B	MB296B	MB296B	MB630B	MB630B	MB058B	MB058B	MB109B	MB109B	MB109B	MB312C	MB312C	MB312C	MB441B	MB441B	MB441B	MB043C	MB043C	MB213B	MB213B	NP2631-GH146-LexA	NP2631-GH146-LexA	NP2631-GH146-LexA
										Reporter	nlstdTomato	nlstdTomato	nlstdTomato	nlstdTomato	nlstdTomato	nlstdTomato	nlstdTomato	nlstdTomato	nlstdTomato	nlstdTomato	nlstdTomato	mCD8::GFP	nlstdTomato	nlstdTomato	nlstdTomato	nlstdTomato	unc84-GFP	unc84-GFP	unc84-GFP	mCD8::GFP	mCD8::GFP	nlstdTomato	nlstdTomato	nlstdTomato	nlstdTomato	nlstdTomato	nlstdTomato	nlstdTomato	nlstdTomato	nlstdTomato	nlstdTomato	nlstdTomato	nlstdTomato	nlstdTomato	nlstdTomato	nlstdTomato	mCD8::GFP	mCD8::GFP	mCD8::GFP
										Sex	F	F	F	F	F	F	F	F	F	F	F	F	F	F	F	F	F	F	F	F	F	F	F	F	F	F	F	F	F	F	F	F	F	F	F	F
										PID	20_1_1	20_1_2	20_1_3	20_11_2	20_11_3	20_11_4	20_11_5	20_1_4	20_1_5	20_1_6	15_12_6	19_4_6	15_10_8	19_4_1	19_9_1	19_9_2	19_5_1	19_4_7	19_4_8	19_4_5	15_10_7	15_10_5	16_9_7	15_12_5	16_9_8	19_4_3	15_12_4	19_9_3	19_9_4	19_9_5	19_9_6	15_10_6	14_10_5	19_4_4	14_10_4	19_4_2	YoshiWGB_1	YoshiWGB_2	YoshiWGB_3
										Sorting	FACS	FACS	FACS	FACS	FACS	FACS	FACS	FACS	FACS	FACS	Hand	Hand	Hand	Hand	Hand	Hand	FACS	Hand	Hand	FACS	Hand	Hand	Hand	Hand	Hand	Hand	Hand	FACS	FACS	FACS	FACS	Hand	Hand	Hand	Hand	Hand	Hnad	Hand	Hand
										Number of sorted cells	2500	2500	2500	1000	1000	1000	1000	2500	2500	2500	396	358	266	390	722	766	289	285	279	462	252	284	284	442	274	405	378	703	629	600	570	280	1048	385	1048	381	28	20	28
										µg cDNA	5.283	5.901	4.866	2.76	1.35	1.56	2.25	5.085	3.222	3.99	6.62	3.27	0.85	2.13	4.38	3.64	2.82	3.78	2.91	2.75	2.84	2.21	2.5	2.6	0.96	2.25	3.64	3.35	2.57	3.53	3.81	3.47	3.21	2.07	4.25	2.56	3.96	4.82	5.24
										nM Kapa	4.57495	5.04082	3.89361	6.37	3.22	4.23	5.25	5.16566	2.74113	4.71313	9.73	2.23	1.91	2.98	7.32	5.94	2.48	2.4	2.04	1.53	6.83	5.48	2.82	5.32	3.24	2.68	3.77	6.08	4.1	4.04	5.01	4.77	5.09	2.24	5.77	2.81	12.25	32.81	25.79
										instrument	NextSeq	NextSeq	NextSeq	NextSeq	NextSeq	NextSeq	NextSeq	NextSeq	NextSeq	NextSeq	HiSeq	NextSeq	HiSeq	NextSeq	NextSeq	NextSeq	NextSeq	NextSeq	NextSeq	NextSeq	HiSeq	HiSeq	HiSeq	HiSeq	HiSeq	NextSeq	HiSeq	NextSeq	NextSeq	NextSeq	NextSeq	HiSeq	HiSeq	NextSeq	HiSeq	NextSeq	MiniSeq	MiniSeq	MiniSeq
										s-/p-end	paired	paired	paired	paired	paired	paired	paired	paired	paired	paired	single	paired	single	paired	paired	paired	paired	paired	paired	paired	single	single	single	single	single	paired	single	paired	paired	paired	paired	single	single	paired	single	paired	paired	paired	paired
										mapped reads	2.55108e+07	2.4748e+07	2.2927e+07	21999467	24616999	24148219	21147743	1.93528e+07	2.43294e+07	2.19953e+07	3.38498e+07	2.03827e+07	1.68827e+07	1.56012e+07	1.97248e+07	2.18733e+07	1.90803e+07	2.97324e+07	2.14704e+07	2.03715e+07	2.03049e+07	1.97689e+07	3.5874e+07	23694401	28865618	15812905	23521273	19967290	19438798	2.17095e+07	2.43533e+07	2.21115e+07	2.63402e+07	1.52349e+07	2.42795e+07	1.54757e+07	2150518	1690146	2076466
										genes (n>0)	10628	10757	9886	17664	18006	16229	11911	9883	8089	9789	11758	6315	5846	4999	8735	7403	5863	7659	5683	5612	9596	7836	9331	8908	6142	5557	9924	8600	6471	8056	7802	8958	9063	5096	9828	5012	15049	7544	9283
										genes (n>1)	10140	10252	9379	13608	14075	12825	9436	9407	7679	9325	11066	5899	5496	4606	8326	7034	5344	7197	5259	5220	9186	7426	8855	8414	5385	5165	9478	8215	6076	7705	7458	8600	8695	4755	9411	4628	12144	6053	7476
										genes (n≥10)	8505	8625	7965	5997	6443	6143	5175	7960	6610	7861	8992	4883	4843	3886	7146	6126	4329	5962	4350	4371	7834	6399	7559	7277	4516	4343	8129	7101	5167	6687	6500	7448	7667	4022	8207	3930	6489	3802	3484
										Cell type	KC-γ							KC-α/β			PPL1-γ1pedc		PAM-γ5				PPL1-γ2 α′1			PPL1-α3		PPL1-α′2α2		PAM-β′2a			PAM-γ4<γ1γ2			PAM-γ3			PAM-α1		PMA-β1, PAM-β2		MB-APL
	transcript_id	gene_type	gene_ID	gene_symbol	gene_fullname	annotation_ID	transcript_type	transcript_ID	transcript_symbol		Sample_PID_20_1_1	Sample_PID_20_1_2	Sample_PID_20_1_3	Sample_20_11_2	Sample_20_11_3	Sample_20_11_4	Sample_20_11_5	Sample_PID_20_1_4	Sample_PID_20_1_5	Sample_PID_20_1_6	Sample_15_12_6	Sample_19_4_6	Sample_15_10_8	Sample_19_4_1	Sample_19_9_1	Sample_19_9_2	Sample_19_5_1	Sample_19_4_7	Sample_19_4_8	Sample_19_4_5	Sample_15_10_7	Sample_15_10_5	Sample_16_9_7	Sample_15_12_5	Sample_16_9_8	Sample_19_4_3	Sample_15_12_4	Sample_19_9_3	Sample_19_9_4	Sample_19_9_5	Sample_19_9_6	Sample_15_10_6	Sample_14_10_5	Sample_19_4_4	Sample_14_10_4	Sample_19_4_2	Sample_YoshiWGB_1	Sample_YoshiWGB_2	Sample_YoshiWGB_3
1	DQ459430										286.55	291.4	458.54	14608.6	47646.1	31302.8	24001	696.27	1466.09	504.57	47.98	190.89	5785.78	3203.14	1366.24	2812.54	532.54	458.94	132.38	388.13	607.46	523.28	209.21	2329.46	702.93	2365.95	1082.58	790.25	4112.2	2392.58	2834.01	2524.88	2374.52	1459.75	2135.84	167.75	270.62	725.5	470.29
2	DQ516784										33.32	29.36	55.07	978.13	5345.1	2131.19	1375.62	54.98	121.08	50.14	3.88	145.16	2321.66	1268.18	81.02	232.34	86.27	108.77	57.81	61.51	423.34	352.33	39.97	726.59	927.19	689.67	281.66	43.67	355.65	227.73	210.36	230.53	1128.3	1810.26	826.33	246.61	8.86	33.5	17.42
3	DQ516752										288.6	257.09	474.45	5335.92	17872.7	9456.62	7174.1	517.58	1292.11	428.2	0	423.46	12973.6	3633.65	566.38	1029.27	556.66	487.14	777.55	269.9	1725.29	1602.23	616.56	6999.91	2914.86	3618.54	1873.41	242.33	1482.44	850.97	922.97	2221.67	12628.8	3699.38	8770.7	116.44	262.45	305.6	256.68
4	DQ668364										9.05	10.66	13.79	740.97	2265.46	894.35	996.69	40.16	87.96	23.5	3.44	42	121.79	112.87	69.77	265.23	62.56	31.83	39.88	3.68	33.47	74.15	11.85	118.6	82.32	275.67	52.47	46.65	109.17	95.76	76.85	109.88	277.27	164.74	75.4	60.74	16.13	24.92	12.99
5	DQ883670										0	0	0	0	0	0	0	0	0	0	0	0	0	0	0	0	0	0	0	0	0	0	0	0	0	0	0	0	0	0	0	0	0	0	0	0	0	0	0
6	EF011062										0	0	0	0	0	1.11	0	0	0	0	0	0	0	0	0	0	0	0	0	0	0	0	0	0	0	0	0	0	0	0	0	0	0	0	0	0	0	0	0
7	DQ875385										0	0	0.06	1.94	0	0	0	0	0.26	0	0	0	0	0	5.31	0	0	0	0	0	0	0	0	1.85	0	0	0	0	1.09	2.35	0	0	0	0	0	0	0	0	0
8	DQ883664										0.98	0	0	0	0	0	0	0	0	0	0	0	0	0	0	0	0	0	0	0	0	0	0	0	0	0	0	0	0	0	0	0	0.88	0	0	0	0	0.51	0
9	DQ459420										0	0	0	0	0	0	0	0	0	0	0	0	0	0	0	0	0	0	0	0	0	0	0	0	0	0	0	0	0	0	0	0	0	0	0	0	0	0	0
10	DQ883651										0	0.62	0.45	81.89	0	0	8.05	8.53	10.25	9.32	0	0	889.09	7.51	15.14	8.38	0	2.14	0	0	0	0	7.18	0	0	0	6.46	5.28	13.53	4.94	30.04	0	100.88	0	8.31	0	0	0	12
11	DQ855004										9.37	7.33	5.21	254.45	161.14	430.28	352.66	21.91	35.75	17.59	1.4	20.09	272.29	0	7.46	47.59	2.98	0.54	1.4	0.42	56.96	100.94	3.53	84.92	0	69.5	48.63	10.25	26.74	37.77	113.76	57.43	63.19	126.52	85.81	1.08	9.35	0.61	1.67
12	DQ854993										0	0	0	0	0	0	0	0	0	0	0	0	0	0	0	0	0	0	0	0	0	0	0	0	0	0	0	0	0	0	0	0	0	0	0	0	0	0	0
13	DQ883689										6.36	4.8	19.52	65.24	166.64	358.3	57.22	18.72	38.04	13.83	0.19	33.46	398.27	350.62	32.82	66.36	11.68	0.89	5.42	2.02	4.04	8.45	1.04	18.42	4.73	129.18	2.12	6.79	48.78	69.15	77.72	12.07	18.07	0.59	54.36	16.9	0	0	0
14	DQ459419										0	0	1.37	0	0	6.14	0	0	0.1	0	0	0	86.25	0	4.79	0.12	0	0	0	0	0	0	0	0	0	0	0	4.59	0	0.11	0.8	0	0	0	2.13	0	0	0	0
15	DQ459431										0	0	0	0	0	0	0.32	0.41	0	0	0	0	0	0	0	0	0	0	0	0	0.41	0	0	0	0	0	0	0	0	0	0	0	0	0	0	0	0	0	0
16	DQ516796										0	0.16	0	0	0.39	0	0	0	0.05	0	0	0	1.6	1.32	0	0	0	0	0	0	0	0	0	0	0	0	0	0	0	0	0.05	0.06	0.26	0	0.18	0	0	0	0
17	DQ855001										3.11	2.7	0	22.4	1.67	0	6.97	4.37	0	0.92	0	0	0	0.24	1.86	32.48	0	0	0	14.13	0.52	0	0.13	0	0	1518.63	7.04	0.68	125.52	7.32	1.01	5.6	61.82	0	0	0	0	0	0
18	DQ459413										5.32	8.48	33.71	59.62	147.95	206.16	146.3	4.7	11.72	2.1	0.1	0	105.44	41.04	46.66	11.59	11.67	5.28	0	24.43	7.84	32.45	0	19.03	0.21	26.27	41.95	14.61	57.53	37.08	30.62	25.14	2.9	0	10.63	4.66	0	0	0
19	DQ883656										0	0	0	0	0	0	6.56	0	0	0	0	0	0	0	0	0	0	0	0	0	0	0	0	0	0	0	0	0	0	0	0	0	0	0	0	0	0	15	0
20	DQ883661										0	0	0	0	0	0	0	0	0	0	0	0	0	0	0	0	0	0	0	0	0	0	0	0	0	0	0	0	0	0	0	0	0	0	0	0	0	0	0
21	EF011069										0	0	0	0	0	0	0	0	0	0	0	0	0	0	0	0	0	0	0	0	0	0	0	0	0	0	0	0	0	0	0	0	0	0	0	0	0	0	0
22	DQ516783										39.06	21.88	67.54	799.6	2211.39	1823.41	1106.29	64.76	203.82	64.43	4.13	49.83	980.77	534.88	117.31	344.64	39.13	51.33	18.43	52.61	209.95	212.94	14.76	450.37	192.66	324.19	157.75	64.78	671.93	315.55	333.96	267.52	507.23	1038.47	388.3	196.79	11.25	60.3	26.49
23	DQ516787										4.65	5.97	8.53	39.23	545.75	323.52	142.95	6.99	34.16	6.17	0.38	36.43	203.1	115.57	19.55	17.37	19.12	8.41	5.09	37.07	73.44	39.76	2.15	110.49	47.24	34.68	15.03	8.27	38.77	28.39	29.89	24.78	338.06	41.16	169.22	3.24	9.89	14.98	7.62
24	DQ459424										0.38	1.12	1.44	17.31	9.72	18.32	83.72	1.35	3.32	0.8	0	0	21.58	0	25.9	61.79	12.65	4.47	0	0.13	5.12	0.42	0	0.86	1	0	0.45	6.41	8.3	6.6	10.01	2.71	0	11.61	3.9	0	0	0	0
25	DQ516748										61.16	66.33	62.76	2153.16	18392.4	5626.04	3951.49	134.61	339.79	154.71	0	51.61	16158.7	880.65	222.98	309.21	115.1	246.37	122.86	158.18	1624.71	2663.2	834.62	13386.5	11231.6	2356.97	4141.21	48.21	551.09	162.47	341.06	5097.23	16243.7	1343.79	19816.3	160.92	303.17	274.93	189.65
26	DQ883671										0	0	0	0	0	0	0	0	0	0	0	0	0	0	0	0	0	0	0	0	0	0	0	0	0	0	0	0	0	0	0	0	0	0	0	0	0	0	0
27	DQ516740										0	0	0	0	0	27.28	0	0	0	0	0	0	0	0	0	0	0	0	0	0	0	0	0	0	0	0	0	0	0	0	0	0	0	0	0	0	3.85	0	9.27
28	DQ516785										0.22	0.94	1.66	16.26	10.73	12.57	2.71	1.09	3.93	0	0.25	0	39.48	21.02	3	3.24	0.74	0.09	0.14	1.47	1.29	2.51	4.18	11.84	23.75	0	1.79	0.14	5.18	1.7	13.55	5.35	8.2	4.94	2.67	1.99	0	3.55	0
29	DQ516731										0	0	0	0	7.1	0	0	0	0	0	0	0	0	60.61	1.99	0	0	0	0	0	0	0	0	0	0	0	0	0	0	0.84	0.77	0	0	0	0	0	0	0	0
30	DQ668366										0	0	0	0	0	0	0	0	0	0	0	0	0	0	0	0	0	0	0	0	0	0	0	0	0	0	0	0	0	0	0	0	0	0	0	0	0	0	0
31	DQ459418										0	0	0	0.56	0	0	0	0	0	0	0	0	0	0	0	0	0	0	0	0	0	0	0	0	0	0	0	0	0	0	0	0	0	0	0	0	0	0	0
32	DQ668356										0	2.2	3.89	0	95.96	0	122.74	1.81	0	0	97.09	0	0	0	0	0	0	0	0	0	0	0	0	0	0	0	0	0	9.79	0.28	0	0	0	0	53.09	0	0	0	0
33	DQ516763										18.54	13.25	22.86	491.46	3982.19	2152.89	1373.28	32.87	101.75	37.16	0	105.68	9034.78	239.96	27.1	327.59	38.42	21.97	12.81	139.76	1803.3	1099.78	153.59	5208.19	3041.89	719.96	1027.36	17.81	293.14	64.86	158.68	1561.64	7500.01	636.11	8397.63	50.4	21.2	1.13	1.01
34	DQ459426										0	0	0	0	0	0	0	0	0	0	0	0	0	0	0	0	0	0	0	0	0	0	0	0	0	0	0	0	0	3.66	0	0	0	0	0	0	0	0	0
35	DQ516786										1.88	2.8	6.27	51.61	259.79	32.97	17.6	6.21	6.75	14.44	0.13	9.71	21.64	61.42	14.02	38.59	13.68	3.23	4.68	152.37	10.6	6.12	0.89	17.42	37.17	54.67	3.98	1.49	39.54	4.62	10.19	6.68	60.61	47.12	29.25	5.48	0	5.91	2.54
36	DQ883653										0	0	0	46.69	35.29	0	0	0	0	0	0	0	0	0	0	0	0	0	0	0	0	0	0	0	0	0	0	0	0	0	0	0	0	0	0	0	0	0	0
37	DQ459421										0	0	0	0.09	0	0	0	0	0	0	0	0	2.26	0	0	0	0	0	0	0	0	0	0	0	0	0	0	0	0	0	0	0	0	0	0.32	0	0	0	0
38	DQ883654										8.91	3.55	40.19	178.95	399.35	58.02	107.32	8.56	7.12	4.45	0	0	251.2	76.23	22.54	13.1	0	0.33	0.73	0	6.46	9.28	0	9.09	41.79	38	0	5.3	41.41	15.52	0.6	36.31	112.4	0	201.67	0	0	12.54	0
39	DQ668358										0	0	0	0	0	0	0	0	0	0	0	0	0	0	0	0	0	0	0	0	0	0	0	0	0	0	0	0.26	0	0	0	0	0	0	0	0	0	0	0
40	DQ516754										255.11	225.91	472.67	8813.22	38982.7	16927.8	11735.8	700.57	1688.47	553.88	82.5	557.65	90214.1	4607.08	997.21	1955.91	368.79	525.52	253.87	473.66	6566.97	7175.06	835.37	21570.3	10187.9	4444.68	7231.02	270.66	3302.74	1186.88	2032.8	7056.13	41860.9	6183.79	32821.7	535.06	713.9	1424.63	1100
41	DQ516778										0	0	0	0	0	0	0	0	0	0	0	0	19.74	0	0	0	0	0	0	0	0	0	0	0	0	0	0	0	0	0	0	0	0	0	0	0	0	0	0
42	DQ883650										5.94	0.83	0	206.47	210.14	222.11	173.68	1.66	1.75	13.81	2.08	0	0	0	11.4	6.31	0.26	6.27	0	0	0	11.6	0	0	0	33.08	79.73	0.96	0	18.97	59.48	0	82.14	1.09	10.25	0	0	28.21	2.84
43	DQ516742										0	0	0	0	0	0	0	0	0	0	0	0	0	0	0	0	0	0	0	0	0	0	0	0	0	0	0	0	0	0	0	0	0	0	0	0	0	0	0
44	DQ883673										0	1.7	1.06	7.09	88.48	70.37	41.38	0.32	0.57	7.75	0	0	15.06	0.98	1.48	0.27	0	0	0	0	0	0	0	9.1	0.57	0	0.86	0.84	0	4.78	4.29	2.98	0	0	0	0	0	0	0
45	DQ883652										0.2	0.21	0	124.23	1053.48	74.93	255.02	28.34	0	0.23	0	0.26	104.68	0	0	128	0	0	0	0	0	0	0	20.55	0	0	0	0	1.4	0	9.88	57.76	4.2	86.29	46.53	0	0	10.14	0
46	DQ854991										0	0	0	0	0	0	0	0	0	0	0	0	0	0	0	0	0	0	0	0	0	0	0	0	0	0	0	0	0	0	0	0	0	0	0	0	0	0	0
47	DQ516780										0	0	0	0	0	0	0	0	0	0	0	0	0	0	0	0	0	0	0	0	0	0	0	0	0	0	0	0	0	0	0	0	0	0	0	0	0	0	0
48	DQ883682										0	0.24	0.13	0.33	11.91	21.1	43.72	2.25	2.15	0.41	0	0	0	0	0	13.49	0	0.87	0	0	0	0	0.54	0	0	0	5.35	1.4	0.41	3.62	0	2.34	20.23	0	0	0	0	0	0
49	DQ883669										0	3.1	0	0	0	0	111.53	0.2	0	0	0	0	0	0	0	0	0	0	0	0	0	0	0	0	0	0	0	1.36	0	0	0	0	0	0	0.35	0	0	0	0
50	DQ516791										0	0	0	0	0	0	0	0	0	0	0	0	0	0	0	0	0	0	0	0	0	0	0	0	0	0	0	0	0	0	0	0	0	0	0	0	0	0	0
51	DQ459425										8.43	5.87	0.8	92.55	264.61	391.15	155.89	39.48	97.83	17.05	0.1	0	4.46	0.42	2.84	26.21	0	0.17	0	1.84	3.34	11.01	0	0.23	0	0	9.65	45.32	128.99	7.08	63.07	0.96	23.86	0.18	8.81	1.56	0	0	24.74
52	DQ516759										13.46	13.88	54.49	681.6	2885.83	1697.12	1540.7	93.17	118.43	48.88	90.07	228.6	775.6	91.05	39.23	265.29	130.63	66.06	25.43	11.96	279.32	401.03	45.6	2131.59	950.62	402.12	0	52.45	379.54	176.48	297.16	1426.54	3363.32	823.59	664.84	428.06	14.89	18.25	20.36
53	DQ459429										307.1	266.15	491.45	13710.5	43142.2	27935.8	20094	825.18	1528.49	547.23	50.85	102.01	6045.7	3427.19	1375.97	1955.87	447.3	451.96	183.7	324.81	1263.12	816.19	110.55	2079.5	973.62	2244.32	1281.5	635.04	4102.06	2614.89	2491.82	2014.39	2530.45	2530.1	3106.49	134.56	243.46	680.22	372.84
54	DQ516758										0	0	0	0	0	0	0	0	0	0	0	0	0	0	0	0	0	0	0	0	78.4	0	0	0	0	0	0	0	0	0	0	0	0	0	0	0	0	0	0
55	DQ459415										0	0	0	0	0	0	0	0	0	0	0	0	0	0	0	0	0	0	0	0	0	0	0	0	0	0	0	0	0	0	0	0	0	0	0	0	0	0	0
56	DQ875387										0.88	0	0.56	67.02	33.75	120.27	17.36	1.69	0	2	0.07	0	0.2	1.38	8.51	0.1	0.43	0	0	0	4.67	0	0	2.7	0	2.36	0	3.35	1.65	5.83	0.24	0	0	0.3	16.79	0	0	0	0
57	DQ516815										0	0	0.12	0	0	0	0	0	0	0	0	0	0	0	0	0	0	0	0	0	0	0	0	0	2.51	0	0	0	0	0	0	0	0	0	0	0	0	0	0
58	DQ668365										20.91	24.14	28.92	700.53	2475.1	1663.65	1106.77	28.92	34.9	17.13	2.26	2.9	349.65	452.4	72.75	80.15	15.32	31.36	19.87	0	3.11	10.05	1.27	60.45	16.14	69.88	107.93	80.06	145.38	116.61	89.81	65.5	166.53	112.27	325.89	8.48	19.8	62.36	56.33
59	DQ854998										0	0	0	0	0	0	0	0	0	0	0	0	0	0	0	0	0	0	0	0	0	0	0	0	0	0	0	0	0	0	0	0	0	0	0	0	0	0	0
60	DQ883685										66.37	52.16	99.95	883.78	2787.26	1952.15	1107.85	129.81	224.4	93.64	7.52	50.6	1121.31	609.76	259.73	363.36	200.12	134.93	60.45	142.73	246.38	269.45	30.38	461.72	373.85	981.35	184.35	129.57	854.74	366.84	461.9	394.83	413.82	573.6	464.34	526.62	12.74	20.48	9.8
61	DQ459422										4.21	0.96	1.25	26.17	95.25	226.21	243.84	3.57	13.9	3.37	0.49	0	35.88	36.39	0.38	10.98	31.41	0.41	29.12	54.09	65.31	32.18	0.1	30.92	1.04	55.68	27.21	0.84	19.62	18.08	28.66	15.3	4.37	49.76	35.67	0.22	0	0	0
62	DQ883663										101.89	121.72	145.46	5950.96	19705.3	9642.29	8302.12	252	537.83	153.67	17.59	167.87	1189.06	553.38	505.52	887.6	234.57	209.63	115.78	412.02	399.29	442.44	53.9	1053.66	448.77	1040.91	415.69	258.61	1794	1030.03	817.45	721.43	977.82	734.56	883.42	32.41	99.31	85.95	117.13
63	DQ668367										4.08	1.66	7.38	61.33	173.24	109.23	37.98	6.26	20.67	8.13	0.42	0.62	26.71	10.98	8.18	18.82	4.48	0.53	0.2	0	6	1.62	2.51	5.84	0.08	5.15	0.91	5.97	89.06	98.66	31.81	12.46	4.63	2.25	6.87	31.85	0	10.45	0
64	DQ459412										0	0	0	0	0	0	0	0	0	0	0	0	0	0	0	0	0	0	0	0	0	0	0	0	0	0	0	0	0	0	0	0	0	0	0	0	0	0	0
65	DQ854992										0	0	0	0	0	0	0	0	0	0	0	0	0	0	0	0	0	0	0	0	0	0	0	0	0	0	0	0	0	0	0	0	0	0	0	0	0	0	0
66	DQ516782										0	0	0	6.06	0	0	0	0	0.98	0	0	0	0	0	0	0	0	0	0	0	0	0	0	0	0	0	0	0	0	0	0	28.78	0	0	0	0	0	0	0
67	DQ459427										0	0	0	4.88	0	0.08	48.06	0	0	0	0	0	46.32	0	0	0	0	3.29	0	0	0	0	0	0	0	0	0	0	2.52	2.96	0.5	0	0	0	7.55	0	0	0	0
68	EF011072										1061.72	925.64	1657.34	35320	125045	72839.4	59514.8	2089.8	4653.91	1586.99	111.54	1340.43	14180.5	12250.1	4644.42	7684.24	1800.04	2033.92	1177.57	2323.63	2406.51	1949.75	634.76	7128.75	3458.02	16322.1	2382.51	1856.2	13540.6	8119.44	7236.03	4265.82	9839.58	13100.6	8016.6	2217.59	358	451.75	470.06
69	DQ855003										14.07	17.8	0.18	160.14	119.12	322.03	544.9	4.15	13.38	9.25	1.23	0	0	110.55	31.73	0.37	1.44	1.57	1.16	6.99	21.73	0	0.94	2.78	0	3.04	37.82	1.34	23.82	29.55	37.14	27.34	0.43	1.44	37.92	0	0	0	0
70	DQ516739										0	0	0	0	0	0	0	0	0	0	0	0	0	0	0	0	0	0	0	0	0	0	0	0	0	0	0	0	0	0	0	0	0	0	0	0	0	0	0
71	EF011063										56.17	54.18	119.05	1305.17	4476.78	3651.88	2633.81	116.65	274.46	81.8	3.18	122.75	336.42	526.13	211.82	473.15	357.59	99.67	35.36	29.84	83.81	93.68	47.62	181.51	233.73	967.42	98.3	100.95	579.45	398.62	610.29	262.34	193.77	764.62	361.71	95.07	33.33	53.3	22.22
72	DQ855000										0	0	0	0	0	0	0	0	0	0	0	0	0	0	0	0	0	0	0	0	0	0	0	0	0	0	0	0	0	0	0	0	0	0	0	0	0	0	0
73	DQ516777										0	0	0	0	0	0	0	0	0	0	0	0	0	0	0	0	0	0	0	0	0	0	0	0	0	0	0.2	0	0	0	0	0	0	0	0	0	0	0	0
74	DQ883646										0	0	0	0	0	0	0	0	0	0	0	0	0	0	0	0	0	0	0	0	0	0	0	0	0	0	0	0	0	0	0	0	0	0	0	0	0	0	0
75	DQ668362										0	0	0	0	0	0.13	0	0	6.93	0	0	0	0	0	0	0	0	0	0	0	0	0	0	0	0	0	0	0	0	0	0	0	0	0	0	0	0	0	0
76	DQ854995										0.25	3.45	4.04	1.68	342	0	93.75	0	1.23	0	0	0	0	0	0	0	0.65	0	0	0	0	0	0	0	0	0	0	0	0	0	0	106.54	0	1.38	23.67	0	0	0	0
77	DQ875386										17.56	24.95	18.02	747.92	2194.2	1236.14	1028.03	92.56	151.53	70.62	3.36	48.63	408.69	629.87	52.39	163.43	82.97	54.71	15.08	33.11	113.56	109.88	12.06	336.64	58.13	316.79	105.53	38.17	422.46	259.76	212.75	257.16	341.02	163.33	315.46	0.49	0	15.77	19.49
78	DQ516790										0	0	0	0	0	0	0	3.42	0.11	0	0	0	0	0	0	0	0	0	0	0	0	0	0	0	0	0	0.4	0	0	0	0	4.3	40.12	0	0.82	0	0	0	0
79	DQ883642										0	0	0.33	0.27	1.31	0	83.25	0	0	0	0	0	0	0	17.39	0	0	0	0	0	0	0	0	0	0	0	0	0	0	0	0.28	0	0	0	0	0	0	21.55	0
80	DQ883659										0	0	0	0	7.62	0	8.29	0	2.42	0	0	0	0	0	0	0	0	0	0	0	0	0	0	0	0	0	0	0	0	8.76	0	0	0	0	0	0	0	0	0
81	DQ854997										0	3.46	0	13.24	0	0	52.22	0	0	1.19	0	0	0	0	0	1.19	0	0	0	0	0	0	0	0	0	0	0	0	0	0	0	0	0	0	0	0	0	0	0
82	DQ883643										0	0	0	0	0	0	0	0	0	0	0	0	0	0	0	0	0	0	0	0	0	0	0	0	0	0	0	0	0	0	0	0	0	0	0	0	0	0	0
83	DQ839618										0	0.12	0.9	2.88	1.46	0.09	0	0.94	0	0	0	0	14.85	0	0	0	0	0	0	0	0	0	0	0	0	0	12.67	0	65.36	0	0.45	1.2	0	0	0	0	0	0	0
84	DQ516795										0	0	0.13	0	0	0	0	0.46	0	0	0	0	0	0	0	0	0	0	0	0	0	0	0	0	0	1.73	0	0	0	0	0	0	0	0	0	0	0	0	0
85	DQ883658										0.49	0	0.57	56.7	113.74	64.47	12.53	0	0	0	0	0	41.68	0	0	0	0	0	0	0	0	0	0	0.83	0	0	2.35	0	0	0.18	0	0.58	0	0	4.23	0	0	0	0
86	DQ516750										0	0	0.3	39.24	84.86	3.71	16.3	0.36	0	0	0	0	108.85	1.1	0	6.16	0.68	0.43	0.64	1.02	0	0	0	85.47	0	0	181.3	0	3.69	0.57	3.4	0	0	0	248.82	6.37	15.71	0	24.25
87	DQ668359										2.49	0	0	10.72	0	43.48	63.48	1.04	0	0	0	0	618	0	2.22	0	0	0	0	0	0	0	0	0	0	0	0	0	0	5.94	4.25	0	62.69	0	55.76	0	0	0	0
88	DQ516779										0	0	1.54	0	11.42	0	0	1.09	0	0.66	0	0	0	0	0	0	0	0	0	0	0	8.93	0	0	0	31.69	0	0	0	0	0	2.18	0.52	0	0	0	0	0	0
89	DQ668363										1.61	2.27	5.73	195.16	90.47	72.73	42.15	4.51	13.75	0.16	0	1.23	83.04	18.29	5	0.16	1.51	0.11	41.71	0	7.63	0.43	17.11	10.94	9.02	0.52	3.4	11.65	181.34	2.79	29.91	13.53	6.71	2.73	60.77	0	0	14.73	0
90	DQ516776										0	0	0	0	0	0	0	0	0	0	0	0	0	0	0	0	0	0	0	0	0	0	0	0	0	0	0	0.27	0	0	0	0	0	1.03	1.02	0	0	0	0
91	DQ516773										0	0.12	0.13	27.07	95.2	17.89	44.06	0.31	6.88	0.73	0	0	0	0.24	0.29	0.26	0.15	0.76	0	12.75	57.38	1.11	0.13	4.79	1.58	4.55	0	0.14	1.06	0.85	1.46	14.26	0.69	23.25	4.92	0	0	1.58	0
92	DQ854994										147.7	88.71	202.16	6336	17237.5	9692.86	9018.25	344.03	406.45	171.47	0	230.67	0	475.03	548.37	1033.67	223.94	165.34	42.7	67.48	0	0	0	0	0	1065.45	0	200.56	1141.25	970.88	884.7	0	0	450.85	0	16.41	122.05	217.06	175.94
93	FBtr0081624	non_protein_coding_gene	FBgn0000003	7SLRNA:CR32864	Signal recognition particle 7SL RNA CR32864	CR32864	ncRNA	FBtr0081624	7SLRNA:CR32864-RA		8.42	13.33	41.27	32.17	5.66	17.94	12.33	25.23	8.35	34.19	0	8.3	0	0.69	26.65	6.91	15.66	45.95	0	0	0	0	0	0	0	10.6	0	35.49	0	0	22.69	0	0	50.72	0	71.06	9.27	37.62	23.8
94	FBtr0071763	protein_coding_gene	FBgn0000008	a	arc	CG6741	mRNA	FBtr0071763	a-RA		38.29	54.52	102.28	60.84	20.01	2.1	8.26	20.16	39.2	11.34	3.42	1.79	0.18	0	0	0	0	1.35	0.04	0	1.95	0	0.62	0	0	3.77	0.32	0	0	0	0	0	1.78	0	6.54	0	0	0	0
95	FBtr0071764	protein_coding_gene	FBgn0000008	a	arc	CG6741	mRNA	FBtr0071764	a-RB		68.48	123.59	141.06	19.14	5.01	50.47	44.09	82.38	70.25	102.33	6.97	4.68	0.6	7.31	2.2	0	0	0.16	2.9	5.99	6.02	0	1.38	1.83	0	0	1.2	0	0	1.04	0.06	2.04	11.56	0.04	11.85	0	0	0	0
96	FBtr0100521	protein_coding_gene	FBgn0000008	a	arc	CG6741	mRNA	FBtr0100521	a-RC		172.03	158.54	58.02	0	0	0	0	68.13	12.03	34.26	0.02	0	0	0	10.66	0.36	0	1.1	0.08	0	0	8.71	0	0	0	0	0	0	0	9.25	0	0	0	0	0	0.62	0	0	0
97	FBtr0342981	protein_coding_gene	FBgn0000008	a	arc	CG6741	mRNA	FBtr0342981	a-RD		0.18	0.66	0	0	6.49	0	0	0	0	0	0	0	0	0	0	0	0	0	0	0	0	0	0	0	0.07	0	0	0.06	0	0	0	0	0	0	0	0.07	0	0	0
98	FBtr0083387	protein_coding_gene	FBgn0000014	abd-A	abdominal A	CG10325	mRNA	FBtr0083387	abd-A-RA		0	0	0	0	0	0	0	0	0	0	0	0	0	0	0	0	0	0	0	0	0	0	0	0	0	0	0	0	0	0	0	0	0	0	0	0	0	0	0
99	FBtr0083388	protein_coding_gene	FBgn0000014	abd-A	abdominal A	CG10325	mRNA	FBtr0083388	abd-A-RB		0	0.03	0	0	0	0	0	0	0	0	0	0	0	0	0	0	0	0	0	0	0	0	0	0	0	0	0	0	0	0	0.03	0	0	0	0.03	0.06	0	0	0
100	FBtr0300485	protein_coding_gene	FBgn0000014	abd-A	abdominal A	CG10325	mRNA	FBtr0300485	abd-A-RC		0	0	0	0	0	0	0	0	0	0	0	0	0	0	0	0	0	0	0	0	0	0	0	0	0	0	0	0	0	0	0	0	0	0	0	0	0	0	0
101	FBtr0306337	protein_coding_gene	FBgn0000014	abd-A	abdominal A	CG10325	mRNA	FBtr0306337	abd-A-RD		0	0	0	0	0	0	0	0	0	0	0	0	0	0	0	0	0	0	0	0	0	0	0.17	0	0.46	0	0.3	0	0	0	0	0	0.88	0	0	0	0	0	0
102	FBtr0083381	protein_coding_gene	FBgn0000015	Abd-B	Abdominal B	CG11648	mRNA	FBtr0083381	Abd-B-RC		0	0	0	0	0	0	0	0	0	0	0	0	0	0	0	0	0	0	0	0	0	0	0	0	0	0	0	0	0	0	0	0	0	0	0	0	0	0	0
103	FBtr0083382	protein_coding_gene	FBgn0000015	Abd-B	Abdominal B	CG11648	mRNA	FBtr0083382	Abd-B-RA		0	0	0	0	0	0	3.67	0	0	0	0.04	0	0	7.4	0	0	0	0	0	0	0.39	0	0	0	0	0	0	0	0	0	0	5.44	0	0	0	0	0	0	0
104	FBtr0083383	protein_coding_gene	FBgn0000015	Abd-B	Abdominal B	CG11648	mRNA	FBtr0083383	Abd-B-RD		0	0	0	0	0	0	0	0	0	0	0	0	0	0	0	0	0	0	0	0	0	0	0	0	0	0	0	0	0	0	0	0	0	0	0	0	0	0	0
105	FBtr0083384	protein_coding_gene	FBgn0000015	Abd-B	Abdominal B	CG11648	mRNA	FBtr0083384	Abd-B-RB		0	0.02	0.5	0	0	0	0	0	0	0.03	0	0	0.04	0	0	0	0	0	0	0	0.18	7.05	0	0	0.03	0	0.18	0	0	0.07	0	0	0	0	1	0	0	0	0
106	FBtr0083385	protein_coding_gene	FBgn0000015	Abd-B	Abdominal B	CG11648	mRNA	FBtr0083385	Abd-B-RE		0	0	0	0	0	0	0	0	0	0	0	0	0	0	0	0	0	0.07	0	0	0	0	0	0	0	0	0	0	0	0	0	0	1.13	0	0	0	0	0	0
107	FBtr0330709	protein_coding_gene	FBgn0000015	Abd-B	Abdominal B	CG11648	mRNA	FBtr0330709	Abd-B-RF		0	0	0	0	0	0	0	0	0	0	0	0	0	0	0	0	0	0	0	0	0	0	0	0	0	0	0	0	0	0	0	0	0	0	0	0	0	0	0
108	FBtr0346764	protein_coding_gene	FBgn0000015	Abd-B	Abdominal B	CG11648	mRNA	FBtr0346764	Abd-B-RG		0	0	0	0	0	0	0	0	0	0	0	0	0	0	0	0	0	0	0	0	0	0	0	0	0	0	0	0	0	0	0	0	0	0	0	0	0	0	0
109	FBtr0415463	protein_coding_gene	FBgn0000015	Abd-B	Abdominal B	CG11648	mRNA	FBtr0415463	Abd-B-RH		0	0	0	0	0	0	0	0	0	0	0	0	0	0	0	0	0	0	0	0	0	0	0.06	0	0	0	1.3	0	0	0	0	0	8.6	0	0	0	0	0	0
110	FBtr0415464	protein_coding_gene	FBgn0000015	Abd-B	Abdominal B	CG11648	mRNA	FBtr0415464	Abd-B-RI		0	0	0	0	0	0	0	0	0	0	0	0	0	0	0	0	0	0	0	0	0	0	0	0	0	0	0	0	0	0	0	0	0	0	0	0	0	0	0
111	FBtr0415465	protein_coding_gene	FBgn0000015	Abd-B	Abdominal B	CG11648	mRNA	FBtr0415465	Abd-B-RJ		0	0	0	0	0	0	0	0	0	0	0	0	0	0	0	0	0	0	0	0	0	0	0	0	0	0	0	0	0	0	0	0	0	0	0.26	0	0	0	0
112	FBtr0075357	protein_coding_gene	FBgn0000017	Abl	Abl tyrosine kinase	CG4032	mRNA	FBtr0075357	Abl-RA		10	11.6	24.72	1.66	0	10.59	5.81	6.98	11.63	16.07	2.89	0	0	0	31.96	52.19	21.04	0.35	0	0	4.14	0	0	0	0	0	0	35.66	17.57	33.91	26.14	14.69	0	0	9.99	0	0	1.67	0
113	FBtr0112790	protein_coding_gene	FBgn0000017	Abl	Abl tyrosine kinase	CG4032	mRNA	FBtr0112790	Abl-RB		6.18	5.73	3.29	6.39	0	2.79	4.65	7.39	2.99	3.96	3.75	0	25.35	0	6.88	5.13	0	1.34	2.23	0	1.72	0	7.93	30.56	8.29	0	9.56	0	0	1.18	0	1.9	5.75	0	9.85	0	0	0	1.56
114	FBtr0330130	protein_coding_gene	FBgn0000017	Abl	Abl tyrosine kinase	CG4032	mRNA	FBtr0330130	Abl-RC		1.89	1.11	8.05	0.02	0	0.48	4.94	0.64	1.15	1.23	0.27	0	0	0	6.37	10.46	3.55	0	0	0	2.82	0	0	0	0	40.11	0.5	0	1.84	6.64	0.38	1.19	0	10.92	1.29	0	0	0	0
115	FBtr0330131	protein_coding_gene	FBgn0000017	Abl	Abl tyrosine kinase	CG4032	mRNA	FBtr0330131	Abl-RD		1.59	0.53	0.15	0.17	0	0.01	8.08	1.63	0.25	0.21	0.2	0	0.03	0	0.06	0	0	0	0	0	0	0	3.99	38.41	0	0	10.05	0	0	0	0	0	0.55	0	0.32	0	0	0	0
116	FBtr0330132	protein_coding_gene	FBgn0000017	Abl	Abl tyrosine kinase	CG4032	mRNA	FBtr0330132	Abl-RE		1.46	0.63	2.32	2.13	26.34	1.08	35.1	0.54	0.2	0.45	0.06	0	0.3	4.04	0.03	0	0	0	0	3.68	1.42	1	6.05	0	0	0.25	2	0	0	0.02	0	0.03	10.41	0.06	2.17	0	0	0	0
117	FBtr0330133	protein_coding_gene	FBgn0000017	Abl	Abl tyrosine kinase	CG4032	mRNA	FBtr0330133	Abl-RF		2.03	0.92	0.62	0	0	0	1.23	1.78	1.38	0.6	0.85	0	0	0	10.83	21.17	0	0	0	0	0.01	0	0	0	0	0	2.3	0	0	0.84	0	0.1	0	0	0.22	0	0	0	0
118	FBtr0330134	protein_coding_gene	FBgn0000017	Abl	Abl tyrosine kinase	CG4032	mRNA	FBtr0330134	Abl-RG		9.69	6.9	0.44	6.95	0	0.13	9.75	23.32	2.98	2.83	2.47	0	0	0	0.3	0	0	0.16	0	0	0	0	0	0	0	0	0	0	0	0.01	0	0.03	0.49	0	2.6	0	0	0	3.46
119	FBtr0330135	protein_coding_gene	FBgn0000017	Abl	Abl tyrosine kinase	CG4032	mRNA	FBtr0330135	Abl-RH		9.11	8.45	7.86	85.03	53.77	25.96	43.77	7.75	2.5	6.16	0.68	1.07	0	92.72	0.16	0	0	6.47	0	0	2.06	7.43	0	0	0	0	0	2.01	0	0.1	0	0.42	10.69	0	19.27	0	0.2	1.37	0
120	FBtr0330136	protein_coding_gene	FBgn0000017	Abl	Abl tyrosine kinase	CG4032	mRNA	FBtr0330136	Abl-RI		10.57	9.47	1.68	0.16	0	0.08	1.4	19.41	13.52	7.59	9.44	0	0	0	54.21	105.87	0	0.01	0	0	0.01	0	0	0	0	0	0	0	0	3.86	0	1.08	0	0	1.53	0	0	0	0
121	FBtr0345369	protein_coding_gene	FBgn0000017	Abl	Abl tyrosine kinase	CG4032	mRNA	FBtr0345369	Abl-RJ		6.12	6.88	11.28	19.1	11.97	26.89	10.09	4.71	2.67	5.67	2.19	9.23	74.99	57.8	5.43	3.63	3.43	6.08	4.03	18.51	27.19	26.39	9.6	0	22.44	38.43	4.64	8.88	2.48	3.21	7.71	6.22	21.58	5.18	23.14	28.56	1.14	0.93	0
122	FBtr0080168	protein_coding_gene	FBgn0000018	abo	abnormal oocyte	CG6093	mRNA	FBtr0080168	abo-RA		0	0.5	0.68	0	0	0	2.16	0.49	0	1.04	0.67	0	0	0	0	0	0	0	0	0	0.18	0	0	0	0	0	0	16.61	2.41	2.84	0	0	0	0	0	0	0	8.45	0
123	FBtr0070072	protein_coding_gene	FBgn0000022	ac	achaete	CG3796	mRNA	FBtr0070072	ac-RA		0	0	0	0	0	0	0	0	0	0	0	0	0	0	0	0	0	0	0	0	0	0	0	0	0	0	0	0	0	0	0	0	0	0	0	0	0	0	0
124	FBtr0082780	protein_coding_gene	FBgn0000024	Ace	Acetylcholine esterase	CG17907	mRNA	FBtr0082780	Ace-RA		33.22	37.7	39.06	75.01	52.67	63.6	71.16	15.52	4.77	11.23	91.66	156.48	436.72	246.24	93.81	108.7	24.43	23.18	36.82	76.05	60.28	39.94	258.26	123.12	221.72	69.65	60.2	84.76	41.97	67.12	54.98	92.84	116.54	50.36	127.67	373.43	14.54	13.55	16.81
125	FBtr0300486	protein_coding_gene	FBgn0000024	Ace	Acetylcholine esterase	CG17907	mRNA	FBtr0300486	Ace-RB		0	0	0	0	16.26	0	0	0	0	7.67	0.27	0	0	0	2.81	39.59	0	0	0	0	0	0	0	1.79	0	43.17	0	0	37.06	0	10.88	9.76	0	0	0	0	0	0.57	0
126	FBtr0335223	protein_coding_gene	FBgn0000024	Ace	Acetylcholine esterase	CG17907	mRNA	FBtr0335223	Ace-RC		0	0.08	0	0	17.09	0	0	0	0	0	0.21	0	0.53	0	1.42	7.52	0	0	0	0	0.37	0	0.07	0	0	0	3.67	9.95	16.45	0	3.18	0.68	0.24	0	0.11	0	39.85	33.31	19.44
127	FBtr0074015	protein_coding_gene	FBgn0000028	acj6	abnormal chemosensory jump 6	CG9151	mRNA	FBtr0074015	acj6-RA		0	0	0	0	0	0	0	0	0	0	0	0	0	0	0	0	0	0	0	0	0	0	0	0	0	0	0.35	0	0	0	0	0	0	0	0	0	0	0	0
128	FBtr0100326	protein_coding_gene	FBgn0000028	acj6	abnormal chemosensory jump 6	CG9151	mRNA	FBtr0100326	acj6-RC		0	0	0	0	0	0	0	0	0	0	0	0	0	0	0	0	0	0	0	0	0	0	0	0	0	0	0	0	0	0	0	0	0	0	0	0	0	0	0
129	FBtr0100328	protein_coding_gene	FBgn0000028	acj6	abnormal chemosensory jump 6	CG9151	mRNA	FBtr0100328	acj6-RD		0	0	0	0	0	0	0	0	0.71	0	7.22	8.49	0	0	0	0.34	2.98	6.59	0	0	0.45	0	19	0	0	0.79	0.02	0	0	0	0	0.49	0	0.11	0	0.19	0	0.37	0
130	FBtr0290063	protein_coding_gene	FBgn0000028	acj6	abnormal chemosensory jump 6	CG9151	mRNA	FBtr0290063	acj6-RE		0	0	0	0	0	0	0	0	0	0	0	0	0	0	0	0	0	0	0	0	0	0	0	0	0	0	0	0	0	0	0	0	0	0	0	0	0	0	0
131	FBtr0290064	protein_coding_gene	FBgn0000028	acj6	abnormal chemosensory jump 6	CG9151	mRNA	FBtr0290064	acj6-RF		0	0	0	0	0	0	0	0	0	0	0	0	0	0	0	0	0	0	0	0	0	0	0	0	0	0	0	0	0	0	0	0	0	0	0	0	0	0	0
132	FBtr0305189	protein_coding_gene	FBgn0000028	acj6	abnormal chemosensory jump 6	CG9151	mRNA	FBtr0305189	acj6-RG		0	0	0	0	0	0	0	0	0	0	0	0	0	0	0	0	0	0	0	0	0	0	0	0	0	0	0	0	0	0	0	0	0	0	0	0	0	0	0
133	FBtr0305190	protein_coding_gene	FBgn0000028	acj6	abnormal chemosensory jump 6	CG9151	mRNA	FBtr0305190	acj6-RH		0	0	0	0	0	0	0	0	0	0	0	18.2	0	28.4	0	0	0	0	0	0.8	0	0	0	0.11	0	0	0	2.93	0	0	0	0	0	0	0	0	0	0	0
134	FBtr0305191	protein_coding_gene	FBgn0000028	acj6	abnormal chemosensory jump 6	CG9151	mRNA	FBtr0305191	acj6-RI		0.21	0.32	0	0.07	0	0	0	0	0	0	5.52	1.08	0	0.12	0.86	0	0.31	0.5	0	0	0	0	13.4	0.13	0.72	0	0.19	0	0	0	0	10.98	0.39	0	0.39	0	0	0	0.55
135	FBtr0305192	protein_coding_gene	FBgn0000028	acj6	abnormal chemosensory jump 6	CG9151	mRNA	FBtr0305192	acj6-RJ		0	0	0	0	0	0	0	0	0	0	0	0	0	0	0	0	0	0	0	0	0	0	0	0	0	0.77	0	0	0	0	0	0	0	0	0	0	0	0	0
136	FBtr0305193	protein_coding_gene	FBgn0000028	acj6	abnormal chemosensory jump 6	CG9151	mRNA	FBtr0305193	acj6-RK		0	0	0	0	0	0	0	0	0	0	0	0	0	0	0	0	0	0	0	0	0	0	0	0	0	0	0	0	0	0	0	0	0	0	0	0	0	0	0
137	FBtr0305194	protein_coding_gene	FBgn0000028	acj6	abnormal chemosensory jump 6	CG9151	mRNA	FBtr0305194	acj6-RL		0	0	0	0	0	0	0	0	0	0	3.26	0	0	0	0	0	0	0	0	0	0	0	0	0	0	0	0	0	0	0	0	1.73	0	0	0	0	0	0	0
138	FBtr0305195	protein_coding_gene	FBgn0000028	acj6	abnormal chemosensory jump 6	CG9151	mRNA	FBtr0305195	acj6-RM		0	0	0	0	0	0	0	0	0	0	0	0	0	0	0	0	0	0	0	0	0	0	0	0	0	0	0	0	0	0	0	0	0	0	0	0	0	0	0
139	FBtr0305196	protein_coding_gene	FBgn0000028	acj6	abnormal chemosensory jump 6	CG9151	mRNA	FBtr0305196	acj6-RN		0	0	0	0	0	0	0	0	0	0	0	0	0	0	0	0	0	0	0	0	0	0	0	0	0	0	0	0	0	0	0	0	0	0	0	0	0	0	0
140	FBtr0085609	protein_coding_gene	FBgn0000032	Acph-1	Acid phosphatase 1	CG7899	mRNA	FBtr0085609	Acph-1-RA		4.13	0	0	0	0	0	0	4.89	0	4.93	0	0	0	0	1.16	0	0	0	0	0	2.2	0	0.76	0	0	0	10.34	0.79	7.73	0	0	0	4.36	0	0	0	0	0	0
141	FBtr0085610	protein_coding_gene	FBgn0000032	Acph-1	Acid phosphatase 1	CG7899	mRNA	FBtr0085610	Acph-1-RB		0	3.63	5.32	16.91	0	1.68	0.54	0.61	0.16	0	0.95	1.75	0	0	1.03	0	4.08	0	0	1.18	0	1.46	0	0	0	4.58	3.56	0.48	0.12	0.06	1.35	3.97	0	0	0.07	0	0	0	0.86
142	FBtr0084619	protein_coding_gene	FBgn0000036	nAChRα1	nicotinic Acetylcholine Receptor α1	CG5610	mRNA	FBtr0084619	nAChRα1-RA		0	0	0	0	0	9.1	0	0	0	0	0	0	0	0	0	0	0	0	0	0	0	0	0	0	0	0	0	5.34	0	0	1.27	11.79	0	0	0	0	0	0	0
143	FBtr0330310	protein_coding_gene	FBgn0000036	nAChRα1	nicotinic Acetylcholine Receptor α1	CG5610	mRNA	FBtr0330310	nAChRα1-RB		0	0	0	0	0	9.1	0	0	0	0	0	0	0	0	0	0	0	0	0	0	0	0	0	0	0	0	0	5.34	0	0	1.27	11.79	0	0	0	0	0	0	0
144	FBtr0334916	protein_coding_gene	FBgn0000036	nAChRα1	nicotinic Acetylcholine Receptor α1	CG5610	mRNA	FBtr0334916	nAChRα1-RC		107.2	121.58	129.5	125.96	156.54	96.14	114.58	80.39	36.15	67.88	27.9	355.15	229.88	102.18	40.59	56.53	65.62	60.77	169.68	203.12	160.19	102.98	130.95	411.19	710.82	278.83	75.32	51.54	66.88	78.46	34.15	45.04	217.63	497.39	224.73	504.61	0.07	0	0.66
145	FBtr0072367	protein_coding_gene	FBgn0000037	mAChR-A	muscarinic Acetylcholine Receptor, A-type	CG4356	mRNA	FBtr0072367	mAChR-A-RA		32.44	31.38	28.88	6.37	22.65	0	0	48.98	0	53.89	7.77	39.08	0	0	19.22	0	0	13.76	84.44	0	34.44	9.05	36.8	1.26	80.43	27.55	14.36	10.69	29.53	5.19	20.65	16.99	38.51	0	2.85	105.87	0	6.91	10.67
146	FBtr0072368	protein_coding_gene	FBgn0000037	mAChR-A	muscarinic Acetylcholine Receptor, A-type	CG4356	mRNA	FBtr0072368	mAChR-A-RB		53.34	62.27	51.31	46.05	0	21.11	23.92	63.92	46.62	42.86	9.11	13.87	100.89	86.26	34.08	38.74	94.22	86.18	8.68	54.82	70.94	100.7	14.84	74.22	0	38	15.12	23.67	0	21.89	12.54	22.46	37.98	91.19	51.71	0	10.34	6.31	3.97
147	FBtr0073299	protein_coding_gene	FBgn0000038	nAChRβ1	nicotinic Acetylcholine Receptor β1	CG11348	mRNA	FBtr0073299	nAChRβ1-RA		473.57	525.49	481.06	710.61	360.45	404.74	604.52	408.63	250.24	364.75	99.86	461.03	1503.09	623.81	454.39	503.58	207.01	190.32	83.28	369.65	429.33	343.17	439.71	748.1	931.88	288.58	367.13	364.41	567.5	358	282.19	205.51	280.31	537.33	377.02	1075.93	70.67	92.76	116.87
148	FBtr0073300	protein_coding_gene	FBgn0000038	nAChRβ1	nicotinic Acetylcholine Receptor β1	CG11348	mRNA	FBtr0073300	nAChRβ1-RB		394.03	595.49	600.24	781.54	257.43	480.06	579.07	649.08	314.34	525.44	108.15	451.79	1659.26	712.29	554.73	368.27	96.18	113.75	153	137.47	581.35	484.1	457.94	1036.99	1595.57	176.19	624.78	444.56	443.44	707.3	349.56	406.38	277.73	914.58	890.92	1019.31	170.36	225.11	276.95
149	FBtr0084639	protein_coding_gene	FBgn0000039	nAChRα2	nicotinic Acetylcholine Receptor α2	CG6844	mRNA	FBtr0084639	nAChRα2-RA		35.72	27.96	28.74	39.62	0	0	0	13	0	5.59	4.38	0	354.86	0	7.26	0	0	0	0	0	0	0	5.37	18.25	1.64	32.96	5.54	74.23	11.99	17.03	88.86	1.31	103.02	0	93.46	0	0	0	0
150	FBtr0084640	protein_coding_gene	FBgn0000039	nAChRα2	nicotinic Acetylcholine Receptor α2	CG6844	mRNA	FBtr0084640	nAChRα2-RB		38.07	13.73	54.95	13.08	11.08	38.77	115.43	8.99	24.02	43.22	8.61	45.23	0	21.21	54.5	33.27	2.5	326.31	0.11	86.64	18.99	11.53	0	53.37	9.22	0	41.74	0	222.55	85.06	7.32	12.75	1.11	70.08	5.97	4.77	2.2	5.13	1.77
151	FBtr0070822	protein_coding_gene	FBgn0000042	Act5C	Actin 5C	CG4027	mRNA	FBtr0070822	Act5C-RA		64.34	0	0	0	0	0	0	0	58.93	0	0	0	0	0	0	0	0	0	0	0	0	0	0	0	0	0	0	126.5	0	0	0	0	0	0	0	0	0	0	0
152	FBtr0070823	protein_coding_gene	FBgn0000042	Act5C	Actin 5C	CG4027	mRNA	FBtr0070823	Act5C-RB		54.35	65.38	41.98	36.42	1.42	4.99	90.34	27.75	45.22	30.85	91.95	80.32	413.73	86.22	90.9	23.44	0.32	2	0	3.53	446.22	431.42	363.63	496.94	746.36	0	170.94	95.05	33.18	35.93	13.7	71.51	154.25	1.34	135.1	64.84	25.88	108.7	70.22
153	FBtr0100662	protein_coding_gene	FBgn0000042	Act5C	Actin 5C	CG4027	mRNA	FBtr0100662	Act5C-RC		231.22	281.15	313.93	344.02	19.12	258.87	0	214.35	34.34	142.99	474.72	935.61	695.03	1349.43	165.34	286.18	467.41	215.01	683.31	1491.29	1116.65	969.92	1346.47	629.9	2443.86	307.07	680.34	101.95	109.85	141.5	265.81	667.81	226.93	224.52	301.09	889.64	113.61	9.02	24.42
154	FBtr0100663	protein_coding_gene	FBgn0000042	Act5C	Actin 5C	CG4027	mRNA	FBtr0100663	Act5C-RD		1303.83	1600.48	1543.5	202.3	46.39	89.5	1051.73	539.97	386.28	472.39	0	1903.9	0	3296.66	956.76	669.7	2987.12	1494.59	1912.49	2694.44	0	0	0	0	0	1538.51	0	648.98	817.38	1108.29	640.62	0	0	2343.14	49.72	2880.63	244.95	375.38	351.51
155	FBtr0345894	protein_coding_gene	FBgn0000042	Act5C	Actin 5C	CG4027	mRNA	FBtr0345894	Act5C-RE		0.4	1.75	0.85	0	0	0	0	1.3	0.8	0.95	3.12	2.02	0	0	2.38	0.66	0	0	0.59	0	24.66	0.63	1.34	7.52	0	0	0.47	0	0	2.96	0	4.56	33.29	0	8.79	0	0	0	0
156	FBtr0086029	protein_coding_gene	FBgn0000043	Act42A	Actin 42A	CG12051	mRNA	FBtr0086029	Act42A-RA		15.21	21.46	14.35	0.38	23.09	3.47	0.64	8.35	35.52	7.55	7.17	17.97	0	0	10.61	5.3	0.35	2.32	0.65	0.43	35.96	3.68	0.68	2.91	6.09	0	108.58	3.12	0.08	17.51	2.12	0.16	10.07	0	20.07	0	27.48	48.75	32.95
157	FBtr0071519	protein_coding_gene	FBgn0000044	Act57B	Actin 57B	CG10067	mRNA	FBtr0071519	Act57B-RA		0	0	0	0	0	0	0	0	0	0	0.61	0	0	0	5.21	0.14	0.08	0	0	0	1.71	0	0.33	1.29	2.08	0	98.33	0	0	5.36	0	2.99	0.2	0	0.31	0	0.18	0	0
158	FBtr0078478	protein_coding_gene	FBgn0000045	Act79B	Actin 79B	CG7478	mRNA	FBtr0078478	Act79B-RA		0.21	0	0	0	0	0	0	0	0	0	0	0	0	0	6.77	0	0	0	0	0	0.35	0	0	0	0.52	0.14	0	3.73	0	34.76	0.07	0.8	0	0	0.12	0.16	0	0	0
159	FBtr0334090	protein_coding_gene	FBgn0000045	Act79B	Actin 79B	CG7478	mRNA	FBtr0334090	Act79B-RB		0	0	0	0	0	0	0	0	0	0	1.69	0	0	0	0	0	0	0	0	0	0	0	0	2.27	0	0	9.27	0	0	0	0	0	0	0	0	0	0	0	0
160	FBtr0082785	protein_coding_gene	FBgn0000046	Act87E	Actin 87E	CG18290	mRNA	FBtr0082785	Act87E-RA		0.61	0	0.16	0	0	0	0.07	17.26	0.4	2.18	0.22	0	0	0.15	0.89	0.08	0.09	0.15	0	0.09	0	0	0	0.38	0	0	9.2	0.08	0	7.09	0	0.18	0	0.13	0	0	0	0	0
161	FBtr0082786	protein_coding_gene	FBgn0000046	Act87E	Actin 87E	CG18290	mRNA	FBtr0082786	Act87E-RB		0	0	0	0	0	0	0	0	0	2.37	0	0	0	0	0	0	0	0	0	0	2.09	0	0	0	0	0	3.34	0	0	0	0	0	0	0	0	0	0	0	0
162	FBtr0346242	protein_coding_gene	FBgn0000046	Act87E	Actin 87E	CG18290	mRNA	FBtr0346242	Act87E-RC		0	0.78	0	0	0	0	0	0	0	0	0	0	0	0	0	0	0	0	0	0	0.27	0	0	0	0.09	6.34	57.36	0	0	0	0	0	0	0	0.69	0	0	0	0
163	FBtr0083143	protein_coding_gene	FBgn0000047	Act88F	Actin 88F	CG5178	mRNA	FBtr0083143	Act88F-RA		0	0	0	0	0	0	0	0	0	0	0.44	0.09	0	0	5.68	0	0	0	0	0.27	0	0.12	0	9.89	0.45	0	0	0	0.16	9.84	0	0.17	0.07	0.12	0.32	0	0	0	0
164	FBtr0079219	protein_coding_gene	FBgn0000052	Pfas	Phosphoribosylformylglycinamidine synthase	CG9127	mRNA	FBtr0079219	Pfas-RA		0.07	0.01	0	0	0	0	0	0	0	0.02	0	0	0	0	0	0	0	0	0	0	0	0	0	0	0	0	0	0	0	0	0	0	0	0	0	0	0	0	0
165	FBtr0079220	protein_coding_gene	FBgn0000052	Pfas	Phosphoribosylformylglycinamidine synthase	CG9127	mRNA	FBtr0079220	Pfas-RB		0	0	0	0	0	0	0	0	0	0	0	0	0	0	0	0	0	0	0	0	0	0	0	0	0	0	0	0	0	0	0	0	0.02	0	0	0	0	0	0
166	FBtr0079221	protein_coding_gene	FBgn0000052	Pfas	Phosphoribosylformylglycinamidine synthase	CG9127	mRNA	FBtr0079221	Pfas-RC		0.33	2.28	0	0.13	0	1.54	0	0.52	1.17	2.88	1.12	0	0	0	0	0	0	0	0	0	0.33	0	0.16	0	0	0	0.25	0	0.08	0	0	3.78	0	0	0.02	0	0	0	0.14
167	FBtr0079431	protein_coding_gene	FBgn0000053	Gart	GART trifunctional enzyme	CG31628	mRNA	FBtr0079431	Gart-RA		0.16	0	0	0	0	0	0	1.16	0	0	0	0	0	0	0.14	0	0	0	0	0	0.25	0	0	0	0.03	0	0	0	0	0	0	0	0	0	0	0	0	0	0
168	FBtr0100353	protein_coding_gene	FBgn0000053	Gart	GART trifunctional enzyme	CG31628	mRNA	FBtr0100353	Gart-RB		0	0	0	0	0	0	0	0	0	0.65	0.27	0	0	0	0	0	0	0	0	0	0	0	0	0.12	0	0	0.09	0	0	0	0	0	0	0	0	0	0	0	0
169	FBtr0339663	protein_coding_gene	FBgn0000053	Gart	GART trifunctional enzyme	CG31628	mRNA	FBtr0339663	Gart-RC		0	0.07	0	0	0	0	0	0	0	0	0.52	0	0	0	0	0	0.06	0	0	0	0	0	0.3	0	0	0	0	0.93	0	0	0	1.83	0	0	0	0	0	0	0
170	FBtr0100589	protein_coding_gene	FBgn0000055	Adh	Alcohol dehydrogenase	CG3481	mRNA	FBtr0100589	Adh-RC		0	3.65	1.74	0	0	0	0	0	0	31.8	646.1	0	0	0	0	0	0	7.25	0	0	0	17.13	2.04	53.36	0	1.46	1.5	3.26	0	3.43	0	670.84	110.33	0	6.77	0	0	0	4.19
171	FBtr0100590	protein_coding_gene	FBgn0000055	Adh	Alcohol dehydrogenase	CG3481	mRNA	FBtr0100590	Adh-RE		6.95	11.63	11.46	1.63	0	0	0	8.16	2.47	6.16	0.18	0.74	0	71.46	19.56	0.27	0	4.79	0.14	0.15	0.25	0	380.26	0	6.08	0	0	0	81.95	27.19	87.51	275.83	0	0	0	0	0.35	0	36.75
172	FBtr0100591	protein_coding_gene	FBgn0000055	Adh	Alcohol dehydrogenase	CG3481	mRNA	FBtr0100591	Adh-RF		0	0.2	0	0	0	0	0	0	0	0	121.42	0	1.45	0	0	0	0	0	0	0	0	5.44	30.7	15.55	0	0	0.73	0	0	0	0	67.82	35.03	0	9.68	0	0	0	0.27
173	FBtr0100593	protein_coding_gene	FBgn0000055	Adh	Alcohol dehydrogenase	CG3481	mRNA	FBtr0100593	Adh-RH		0.19	0	0	0	0	0	0	0	0	0	86.51	0	0	0	0.06	0	0	0.12	0	0	9.66	0	58.18	0	1.52	0	0	0	0	0	0	181.05	0	0	2.22	0	0	0	0
174	FBtr0100594	protein_coding_gene	FBgn0000055	Adh	Alcohol dehydrogenase	CG3481	mRNA	FBtr0100594	Adh-RI		0.41	0	2.43	0	0	0	0	1.72	0	0.48	656.01	0	165.45	0	7.91	0	0	0	0	0	63.81	31.24	89.78	94.12	0	0	2.47	0	0	0	0	543.75	154.73	0	53.75	0	0	0	0
175	FBtr0006151	protein_coding_gene	FBgn0000056	Adhr	Adh-related	CG3484	mRNA	FBtr0006151	Adhr-RA		0	0.2	0	0	0	0	0	0	0	0	121.42	0	1.45	0	0	0	0	0	0	0	0	5.44	30.7	15.55	0	0	0.73	0	0	0	0	67.82	35.03	0	9.68	0	0	0	0.27
176	FBtr0100187	protein_coding_gene	FBgn0000056	Adhr	Adh-related	CG3484	mRNA	FBtr0100187	Adhr-RB		0.19	0	0	0	0	0	0	0	0	0	86.51	0	0	0	0.06	0	0	0.12	0	0	9.66	0	58.18	0	1.52	0	0	0	0	0	0	181.05	0	0	2.22	0	0	0	0
177	FBtr0343699	protein_coding_gene	FBgn0000056	Adhr	Adh-related	CG3484	mRNA	FBtr0343699	Adhr-RC		0	0.24	1.31	4.37	0	0	0	0	0	0	0	0	0	0	0	0	0	0	0	0	0	0	0	0	0	0	0	0	0	0	0	0	0	0	0	0	3.16	0	0
178	FBtr0086744	protein_coding_gene	FBgn0000057	adp	adipose	CG5124	mRNA	FBtr0086744	adp-RA		0	4.07	0	0	0	0	0	5.36	0	0	0	0	0	0	0	0	0	1.63	0	0	0	0	0	0	0	0	0	4.73	0	0	0	0	0	0	0	0	0	0	0
179	FBtr0340288	protein_coding_gene	FBgn0000057	adp	adipose	CG5124	mRNA	FBtr0340288	adp-RB		5.06	6.14	11.88	0	6.89	0	0	6.1	1.96	5.41	2.42	0.97	0	0	2.98	0.16	0	5.58	3.49	0	1.27	1.15	18.53	0.29	0.2	0	0.05	12.11	5.73	6.73	1.22	0.36	4.6	0	1.27	0.73	0.67	4.26	2.55
180	FBtr0078053	protein_coding_gene	FBgn0000061	al	aristaless	CG3935	mRNA	FBtr0078053	al-RA		0	0	0.27	0	0	0	0	0	0	0	0	0	0	0	0	0	0	0	0	0	0.36	0	0	0	0	0	0.35	0	0	0	0	0	0	0	0	0	0	0	0
181	FBtr0083478	protein_coding_gene	FBgn0000063	Mps1	Monopolar spindle 1	CG7643	mRNA	FBtr0083478	Mps1-RA		3.48	7.77	4.6	1.05	0	0.91	5.85	2.07	9.37	0.64	1.15	1.81	0	0.11	1.71	0.06	0.07	3.92	26.67	14.17	0	3.35	0	9.39	0	0	1.82	0	2.54	0.05	0.2	0	0.05	1.47	0	0	0	0	0.76
182	FBtr0331348	protein_coding_gene	FBgn0000063	Mps1	Monopolar spindle 1	CG7643	mRNA	FBtr0331348	Mps1-RB		0	1.03	0	0	1.28	0	0	0	0	0	0	0	0	0	0	0	0	0	0	0	1.49	0	2.75	0	0	0	0	0	0	0	0	13.83	0	0	0	0	0	0	0
183	FBtr0084994	protein_coding_gene	FBgn0000064	Ald1	Aldolase 1	CG6058	mRNA	FBtr0084994	Ald1-RB		137.4	128.65	166.55	56.83	65.99	47.36	74.68	51.09	43.27	44.92	198.1	517.21	351.36	89.91	137.83	100.65	300.34	179.87	609.07	229.23	726.09	1019.65	283.41	178.14	261.06	16.71	110.32	55.74	17.91	41.05	54.01	217.4	277.88	283.79	253.4	437.08	570.04	618.11	552.83
184	FBtr0084995	protein_coding_gene	FBgn0000064	Ald1	Aldolase 1	CG6058	mRNA	FBtr0084995	Ald1-RC		0	0.34	0	0	0	0	0	7.91	0	0	0.47	0	0	0	7.25	0	0	0.67	0	0	5.01	0	0	0	0	0	2.03	7.84	0	0	46.83	0.34	1.74	0	2.09	0	1464.22	1223.63	1912.84
185	FBtr0084999	protein_coding_gene	FBgn0000064	Ald1	Aldolase 1	CG6058	mRNA	FBtr0084999	Ald1-RD		7.98	7.74	0.35	2.01	0	0	33.84	4.23	0.33	1.6	5.23	3.61	0	2.11	27.06	0	0.99	2.7	0	4.25	20.65	0	0	0.62	9.68	0.24	9.36	23.4	0	37.65	16.14	0	89.37	0	41.6	0	45.28	28.21	33.85
186	FBtr0085000	protein_coding_gene	FBgn0000064	Ald1	Aldolase 1	CG6058	mRNA	FBtr0085000	Ald1-RE		2.32	1.68	14.79	0	0	0	0	3.69	0	1.53	1.12	1.58	0	0	0.98	7.05	0	0	0.58	0	6.93	21.69	2.9	6.43	0.05	0	6.58	2.87	25.46	1.04	0	1.04	3.81	0	2.69	3.65	0	0	0
187	FBtr0085001	protein_coding_gene	FBgn0000064	Ald1	Aldolase 1	CG6058	mRNA	FBtr0085001	Ald1-RH		0	0	0	0	0	0	0	0	0	0	5.29	0	0	0	0	0	0	0	0	0	19.6	5.21	0.07	27.43	0.35	0	8.82	0	0	0	0	0	45.76	0	65.05	0	22.09	21.83	3.98
188	FBtr0114544	protein_coding_gene	FBgn0000064	Ald1	Aldolase 1	CG6058	mRNA	FBtr0114544	Ald1-RI		0.04	0.01	7.35	0	0	0	0	0.04	0	0.14	0.52	0	6.15	0	0.94	0	0	2.92	3.08	0	0.66	3.07	2.59	3.94	0.01	0	0.17	0.02	0	0.03	0	1.04	0.18	0	0.09	0	0	0	0
189	FBtr0306657	protein_coding_gene	FBgn0000064	Ald1	Aldolase 1	CG6058	mRNA	FBtr0306657	Ald1-RJ		0	0.44	0.28	0	0	0	0	0.92	0.37	0	0.42	2.04	0	0	0	0.18	0.59	0.17	0	0.19	0	0	0	0	0	0	0	0.55	0	3.11	1.1	0	0	0	0	0	0	21.15	16.41
190	FBtr0310660	protein_coding_gene	FBgn0000064	Ald1	Aldolase 1	CG6058	mRNA	FBtr0310660	Ald1-RK		6.49	10.84	2.3	0.51	0	0	56.3	4.23	0.17	3.79	6.63	7.27	0	0	0.01	0	1.55	1.66	0	0	26.15	0	0	4.94	8.6	0.25	1.1	1.2	0	26.74	5.52	0	94.3	0	30.31	0	562.75	853.71	586.84
191	FBtr0310661	protein_coding_gene	FBgn0000064	Ald1	Aldolase 1	CG6058	mRNA	FBtr0310661	Ald1-RL		0	0	0	0	0	0	0	0	0	0	0	0	0.85	0	0	0	0	0	0	0	0	0	0	1.57	0	0	0	0	0	0	4.36	0.93	0	0	0.03	0	0	0	0
192	FBtr0339614	protein_coding_gene	FBgn0000064	Ald1	Aldolase 1	CG6058	mRNA	FBtr0339614	Ald1-RM		81.83	74.86	105.93	13.76	0	0	0	86.12	13.94	36.25	18.21	341.34	0	0	91.2	100.35	0	160.83	0	373.87	0	0	0	0	0	67.99	0	81.24	109.72	162.66	67.64	0	53.47	58.92	24.97	178.42	0	27.45	0
193	FBtr0081618	protein_coding_gene	FBgn0000071	Ama	Amalgam	CG2198	mRNA	FBtr0081618	Ama-RB		0	0	0	0	0	0	0	0	0	0	0	0	0	0	0	0	0	0	0	0	0	0	0	0	0	0	0	0	0	0	0	0	0	0	0	0	0	0	0
194	FBtr0081619	protein_coding_gene	FBgn0000071	Ama	Amalgam	CG2198	mRNA	FBtr0081619	Ama-RA		0	0	0	0	0	0	0	0	0	0	0	0	0	0	0	0	0	0	0	0	0	0	0.34	0	0	0	0	0	0	0	0	0	0	0	0	0	0	0	0
195	FBtr0081620	protein_coding_gene	FBgn0000071	Ama	Amalgam	CG2198	mRNA	FBtr0081620	Ama-RC		0	0	0	0	0	0	0	0	0	0	0.46	0	0	0	0	0	0	0	0	0	0	0	0	0	0	0	2.64	0	0	0	0	0	0	0	0	0	0	0	0
196	FBtr0081153	protein_coding_gene	FBgn0000075	amd	α methyl dopa-resistant	CG10501	mRNA	FBtr0081153	amd-RB		0.24	0.13	0	0	0	0	0	0	0	0	0.55	0	0.13	0	0	4.46	0	0.68	0	0	0	0	0	0	0	0	3.77	0	13.75	0	0	0	0	0	0	0	0	0	0
197	FBtr0081154	protein_coding_gene	FBgn0000075	amd	α methyl dopa-resistant	CG10501	mRNA	FBtr0081154	amd-RA		0	0	0.27	0	0	0	0	0	0	0	0	0	0	0	0	0	0	0.88	0	0	0	1.98	0	0	0	0	1.04	6.55	0	0	0	0	0	0	0.22	0	0	0	0
198	FBtr0071331	protein_coding_gene	FBgn0000077	amx	almondex	CG12127	mRNA	FBtr0071331	amx-RA		0	0	0	0	0	0	0	0	0	0	0.44	0	0	0	0	0	0	0	0	0	0	0	4.24	0.56	0	0	0	0	0	0	0	0	0	0	12.5	0	0	0	0
199	FBtr0307281	protein_coding_gene	FBgn0000077	amx	almondex	CG12127	mRNA	FBtr0307281	amx-RB		4.46	2.69	0	0	0	0	0	0.64	0.63	0	0.71	0	0	0	1.29	0	0	0	0	0	2.15	0	0	0.42	0	0	1.38	0.11	2.73	0	0	0	0.12	0	5.22	0	4.68	0	3.8
200	FBtr0086983	protein_coding_gene	FBgn0000078	Amy-d	Amylase distal	CG17876	mRNA	FBtr0086983	Amy-d-RA		0	0	0	0	0	0	0	0	0	0	0.07	0	0	0	0	0.67	0	0	0	0	0	0	0	0	0	0	64.84	0	0	0	0	0	0	0	0	0	0	0	0
201	FBtr0087004	protein_coding_gene	FBgn0000079	Amy-p	Amylase proximal	CG18730	mRNA	FBtr0087004	Amy-p-RA		0	0	0	0	0	0	0	0	0	0	0.14	0	0	0	0	0.75	0	0	0	0	0	0	0	0	0	0	0	0	0	0	0	0	0	0	0	0	0	0	0
202	FBtr0345521	protein_coding_gene	FBgn0000079	Amy-p	Amylase proximal	CG18730	mRNA	FBtr0345521	Amy-p-RB		0	0	0	0	0	0	0	0	0	0	0	0	0	0	0	0	0	0	0	0	0	0	0	0	0	0	14.06	0	0	0	0	0	0	0	0	0	0	0	0
203	FBtr0089517	protein_coding_gene	FBgn0000083	AnxB9	Annexin B9	CG5730	mRNA	FBtr0089517	AnxB9-RA		0	0.28	0	0	0	0	0	0	0	0	21.12	0	0	0	0	0.21	0	0	0	1.86	0.5	0	3.57	0	0	0.34	1.24	0	0	5.78	0	13.05	12.53	0	0.31	0	0	0	5.87
204	FBtr0089518	protein_coding_gene	FBgn0000083	AnxB9	Annexin B9	CG5730	mRNA	FBtr0089518	AnxB9-RB		0.09	0	0	0	0	0	0	1.31	0	0	0	0	0	0	0	0	0	0.4	0	0	0	0.61	0	0	0	0	4.33	0	0	0	0	0	0	0	0	0	0	0	0
205	FBtr0089519	protein_coding_gene	FBgn0000083	AnxB9	Annexin B9	CG5730	mRNA	FBtr0089519	AnxB9-RC		0	0	0	0	0	0	0	0	0	1.07	39.4	0	0	0	0	0	0	0	0	2.3	0	0	19.62	0	0	0	7.24	0	0	0	0	26.12	2.16	0	3.31	0	0	0	2.64
206	FBtr0089520	protein_coding_gene	FBgn0000083	AnxB9	Annexin B9	CG5730	mRNA	FBtr0089520	AnxB9-RD		0	0	0	0	0	0	0	0	0	0	17.4	0	0	0	0	0	0	0	0	0	0	0	0	0	0	0	0	0	0	0	0	8.06	0	0	0	0	0	0	0
207	FBtr0336797	protein_coding_gene	FBgn0000083	AnxB9	Annexin B9	CG5730	mRNA	FBtr0336797	AnxB9-RE		0	0	0	0	0	0	0	0	0	0	0	0	0	0	0	0	0	0	0	0	0	0	0	0	0	0	0	0	0	0	0	0	0	0	0	0	0	0	0
208	FBtr0336798	protein_coding_gene	FBgn0000083	AnxB9	Annexin B9	CG5730	mRNA	FBtr0336798	AnxB9-RF		0	0	0	0	0	0	0	0	0	0	0	0	0	0	0	0	0	0	0	0	0	0	0	0	0	0	0	0	0	0	0	0	0	0	0	0	0	0	0
209	FBtr0070025	protein_coding_gene	FBgn0000084	AnxB10	Annexin B10	CG9579	mRNA	FBtr0070025	AnxB10-RA		3.23	1.12	1.84	0	0	0.15	0	2.48	0	0	9.83	10.51	0	0	1.86	40.67	0	0	0	0.59	1.19	7.66	0.63	4.82	12.14	0	6.97	26.18	0.42	16.98	0	1.67	0	0.66	9.71	0	30.02	12.09	25.06
210	FBtr0301931	protein_coding_gene	FBgn0000084	AnxB10	Annexin B10	CG9579	mRNA	FBtr0301931	AnxB10-RB		0	0	0	21.53	0	0	0	0	0	6.05	13.97	0	0	0	17.83	0	0	1.34	0	0	0	17.95	0	0	0	0	22.61	0.63	0	14.14	5.79	11.29	0	0	32.96	0	49.39	44.38	12.23
211	FBtr0070504	protein_coding_gene	FBgn0000092	dyw	daywake	CG2650	mRNA	FBtr0070504	dyw-RA		0.11	0	0.13	0	0	0	0	0	0	0	0.38	0	0	0	0	0	0	0	0	0	8.74	0	0	0	0	0	0	0	0	0	0	0	9.74	0	0	0	0	0	0
212	FBtr0085611	protein_coding_gene	FBgn0000094	Anp	Andropin	CG1361	mRNA	FBtr0085611	Anp-RA		0	0	0	0	0	0	0	0	0	0	0	0	0	0	0	0	0	0	0	0	0	0	0	0	0	0	0	0	0	0	0	0	0	0	0	0	0	0	0
213	FBtr0346141	protein_coding_gene	FBgn0000094	Anp	Andropin	CG1361	mRNA	FBtr0346141	Anp-RB		0	0	0	0	0	0	0	0	0	0	0	0	0	0	0	0	0	0	0	0	0	0	0	0	0	0	0	0	0	0	0	0	0	0	0	0	0	0	0
214	FBtr0077850	protein_coding_gene	FBgn0000097	aop	anterior open	CG3166	mRNA	FBtr0077850	aop-RB		18.53	17.15	18.57	8.82	0	7.2	6.86	8.86	0.7	11.67	23.81	23.36	33.5	0	29.05	13.51	0	10.3	14.17	6.57	27.86	47.74	45.02	16.82	3.34	0	39.51	0	0	30.53	21.84	19.53	55.32	39.68	38.86	13.9	0	0	0.73
215	FBtr0077851	protein_coding_gene	FBgn0000097	aop	anterior open	CG3166	mRNA	FBtr0077851	aop-RA		0	0	0	0	0	0	0	0	0	0	0	0	3.88	14.74	0	0	0	0	0	0	15.73	8.68	17.18	14.23	0	50.94	0	14.6	0	0	0	0	0	0	0.08	24.52	0	0	0
216	FBtr0330658	protein_coding_gene	FBgn0000097	aop	anterior open	CG3166	mRNA	FBtr0330658	aop-RC		0.69	0	0	0	21.86	0	0	0	0	0	0	0	0	0	0	0	1.03	0	0	0	0	0	0	0	0	0	0	0	0	0	0	0	0	0	0	0	0	0	0
217	FBtr0330659	protein_coding_gene	FBgn0000097	aop	anterior open	CG3166	mRNA	FBtr0330659	aop-RD		0	0.2	0	0.33	0	21.3	0	0	0	0	0.09	0	0	0	0	0	27.51	0	0	0	0	0	0.06	0	0	0	0.43	0	0	0	0	0.3	0	0	0.14	0	0	0	0
218	FBtr0330660	protein_coding_gene	FBgn0000097	aop	anterior open	CG3166	mRNA	FBtr0330660	aop-RE		0	0	0	0	0.77	0	11.31	19.18	7.02	0	0	0	0	317.46	0	0.62	0	0	8.42	7.16	0	0	0	23.32	0	62.76	0	4.49	2.65	0	2.19	0	0	130.4	0	0	0.44	2.13	0
219	FBtr0078481	protein_coding_gene	FBgn0000100	RpLP0	Ribosomal protein LP0	CG7490	mRNA	FBtr0078481	RpLP0-RA		49.97	65.27	39.89	7.33	6.65	8.15	77.41	68.11	61.7	84.92	13.8	11.73	27.6	0	41.23	31.65	36.35	12.42	0.68	32.35	20.82	4.9	6.93	1.97	0	0.18	0	47.79	58.01	90.07	49.76	19.59	8.03	69.8	37.78	5.13	244.46	166.17	221.74
220	FBtr0334113	protein_coding_gene	FBgn0000100	RpLP0	Ribosomal protein LP0	CG7490	mRNA	FBtr0334113	RpLP0-RB		28.5	30.05	22.61	0	0	93.22	1.76	40.11	29.75	23.98	32.1	17.68	0	0	18.9	56.21	0	0	0	0	14.02	3.98	0	2.77	0	0	11.47	30.95	12.86	24.96	7.46	35.61	0	0	18.54	0	35.09	26.78	67.49
221	FBtr0070109	protein_coding_gene	FBgn0000108	Appl	β amyloid protein precursor-like	CG7727	mRNA	FBtr0070109	Appl-RA		0	0	0	0	0	0	0	0	0	0	0	0	0	0	0	0	0	0	0	0	0	0	0	0	0	0	0	0	0	0	0	0	0	0	0	0	0	0	0
222	FBtr0307291	protein_coding_gene	FBgn0000108	Appl	β amyloid protein precursor-like	CG7727	mRNA	FBtr0307291	Appl-RB		286.25	388.19	396.32	508.53	303.76	506.57	650.41	606.07	257.44	320.1	74.52	821.74	2529.18	134.07	400.78	438.32	877.15	525.31	1356.15	883.63	460.6	978.2	526.39	917.57	2971.11	1376.01	506.44	609.25	633.35	326.33	535.14	307.36	373.23	401.24	721.8	1337.06	10.99	0.55	26.9
223	FBtr0307292	protein_coding_gene	FBgn0000108	Appl	β amyloid protein precursor-like	CG7727	mRNA	FBtr0307292	Appl-RC		258.05	337.42	582.55	97.17	522.35	0	392.35	725.07	37.93	449.44	53.96	2202.97	2503.11	4897.84	202.17	9.08	3656.46	2005.17	4278.34	2253.42	1011.58	2409.75	1101.4	522.92	5094.74	2585.62	501.27	132.83	1166.24	154.49	513.94	555.63	0	2633.72	2.49	4609.46	0	2.27	9.86
224	FBtr0307293	protein_coding_gene	FBgn0000108	Appl	β amyloid protein precursor-like	CG7727	mRNA	FBtr0307293	Appl-RD		354.3	407.15	295.28	457.43	284.38	251.71	428.12	614.22	377.26	486.81	51.28	4.12	134.23	377.44	716.17	727.44	20.47	269.4	1.99	0.46	245.72	158.75	11.91	561.66	9.64	793.87	179.56	1126.15	16.62	717.38	648.35	106.38	230.31	1.54	300.4	0	0	5.72	3.05
225	FBtr0307294	protein_coding_gene	FBgn0000108	Appl	β amyloid protein precursor-like	CG7727	mRNA	FBtr0307294	Appl-RE		117.14	138	156.52	287.64	230.17	378.47	124.73	99.88	104.22	263.13	77.94	109.32	0	1219.24	19.14	52.85	218.16	186.72	360.57	340.29	986.54	1456.86	410.96	1994.25	1015.55	26.44	642.53	16.6	0	275.34	37.54	246.16	786.31	461.45	517.98	390.54	37.69	28.13	18.75
226	FBtr0307295	protein_coding_gene	FBgn0000108	Appl	β amyloid protein precursor-like	CG7727	mRNA	FBtr0307295	Appl-RF		439.47	355.02	394.62	52.47	335.34	61.7	108.09	576.59	392.52	489.82	44.12	3.9	0	12.25	432.04	845.44	109.38	96.16	279.65	0.46	270.12	102.02	1.08	734.49	100.62	10.14	218.01	260.23	476.18	476.38	190.09	119.19	188.66	1.62	143.38	18.41	1.74	6.75	0
227	FBtr0089420	protein_coding_gene	FBgn0000109	Aprt	Adenine phosphoribosyltransferase	CG18315	mRNA	FBtr0089420	Aprt-RA		1.29	6.77	0.7	175.62	0	0.88	0	2.31	0	0.1	0	0	0	0	0	0.18	0	0	0	0	0	10.38	0	0	0	0	0	1.28	0	28.69	6.98	0	0	0	0	0	0	17.33	0
228	FBtr0346440	protein_coding_gene	FBgn0000109	Aprt	Adenine phosphoribosyltransferase	CG18315	mRNA	FBtr0346440	Aprt-RC		0.97	2.09	4.8	0	0	3.5	0	0	0	2.38	0.5	0	0	0	0	0	0	0	0	0	6.77	0	11.81	18.38	0	0.51	4.17	0	0	0	1.02	57.77	0	4.83	5.89	0	0	0	2.62
229	FBtr0346441	protein_coding_gene	FBgn0000109	Aprt	Adenine phosphoribosyltransferase	CG18315	mRNA	FBtr0346441	Aprt-RD		0	0	0	0	0	0	0	0	0	0	2.81	0	0	0	0	0	0	0	0	0	2.29	4.2	0.78	22.65	0	0	12.33	0	0	0	0	63.3	0	0	14.99	0	0	0	2.06
230	FBtr0080344	protein_coding_gene	FBgn0000114	bru1	bruno 1	CG31762	mRNA	FBtr0080344	bru1-RB		21.79	14.96	2.05	0.72	0	0.38	6.89	0	12.4	20.85	10.01	5.44	35.26	3.9	0	15.77	0.12	0	0.04	101.35	10.36	0.06	3.16	81.28	68.76	15	64.94	49.92	80.42	57.19	56.46	44.02	3.81	0	9.92	0	0	0	0
231	FBtr0080345	protein_coding_gene	FBgn0000114	bru1	bruno 1	CG31762	mRNA	FBtr0080345	bru1-RA		0	0	0	0	0	0	0	0	0	0	0	0	0	0	0	0	0	0	0	0	0	0	0	0	0	0	0	0	0	0	0	0	0	0	0	0	0	0	0
232	FBtr0080347	protein_coding_gene	FBgn0000114	bru1	bruno 1	CG31762	mRNA	FBtr0080347	bru1-RD		13.91	9.53	12.55	1.63	0.04	0.15	0	4.95	3.69	17.16	1.69	0.06	7.58	3.95	47.55	43.07	0	0.18	0	2.37	5.66	0.33	2.39	67.12	7.7	5.9	13.99	32.45	1.18	40.43	35.97	5.23	2.08	1.46	2.14	4.28	0	0.57	0
233	FBtr0300567	protein_coding_gene	FBgn0000114	bru1	bruno 1	CG31762	mRNA	FBtr0300567	bru1-RE		0	0	0	0	0	0	0	0	0	0	0	0	1.25	0	0	0	0	0	0	0	0	0	0	0	0	0	0	0	0	0	0	0	0	0	0	0	0	0	0
234	FBtr0331644	protein_coding_gene	FBgn0000114	bru1	bruno 1	CG31762	mRNA	FBtr0331644	bru1-RF		9.06	13.19	19.73	0	0	0	1.89	1.28	4.64	5.35	1.76	0	36.31	0	27.46	22.05	0	0	0	1.96	27.12	0	0.56	6.98	6.33	14.43	24.59	18.79	35.14	27.55	10.48	5.97	15.53	0	20.26	15.87	0	0	0
235	FBtr0331645	protein_coding_gene	FBgn0000114	bru1	bruno 1	CG31762	mRNA	FBtr0331645	bru1-RG		26.73	47.06	64.08	1.6	5.55	0.46	7.02	54.45	44.88	31.7	1.47	23.14	29.39	212.31	102.53	103.2	0	0.8	0	41.61	22.04	0	4.44	71.97	31.28	63.96	39.17	89.99	89.23	11.2	45.57	5.9	0.32	9.25	6.1	38.04	0	0	0
236	FBtr0331646	protein_coding_gene	FBgn0000114	bru1	bruno 1	CG31762	mRNA	FBtr0331646	bru1-RH		0	0	0	0	0.06	0	0	0	0	0	0	0	0	0	0	0	0	0	0	0	0.1	0.83	0	0	0	0	0	0	0	0	0	0	0	0	0	0	0	0	0.09
237	FBtr0331647	protein_coding_gene	FBgn0000114	bru1	bruno 1	CG31762	mRNA	FBtr0331647	bru1-RI		8.73	4.67	0.73	26.59	0	0	5.34	5.52	0	0	2.69	20.63	0	25.35	0	0	0.05	0.06	0	17.88	0	0	14.5	23.87	37.13	15.63	22.27	4.21	0	0	0	17.5	1.1	28.6	19.16	133.53	0	0	0
238	FBtr0331648	protein_coding_gene	FBgn0000114	bru1	bruno 1	CG31762	mRNA	FBtr0331648	bru1-RJ		0	0	0	0	0	0	0	0	0	0	0	0	0	0	0	0	0	0	0	0	0	0	0	0.18	0	0	0	0	0	0	0	0	0	0	0	0	0	0	0
239	FBtr0331998	protein_coding_gene	FBgn0000114	bru1	bruno 1	CG31762	mRNA	FBtr0331998	bru1-RK		0.32	0	0	0	0	0	0	0	0	0	0	0	0	0	0	0	0	0	0	0	0.09	0	0	0	0	0	0	0	0	0	0	0	0	0	0	0	0	0	0
240	FBtr0075517	protein_coding_gene	FBgn0000115	Arl1	ADP ribosylation factor-like 1	CG6025	mRNA	FBtr0075517	Arl1-RA		14.54	12.91	9.4	55.43	0	0	8.36	15.03	15.53	13.04	14.06	17.72	20.17	1.45	11.36	1.77	26.59	9.72	47.28	35.63	40.61	31.29	3.66	23.08	0.85	0	13.44	12.45	0	0	0.55	4.77	19.72	0	33.93	11.88	24.35	20.92	48.4
241	FBtr0076543	protein_coding_gene	FBgn0000116	Argk	Arginine kinase	CG32031	mRNA	FBtr0076543	Argk-RA		0.02	0	0	0	0	0	13.3	0.06	0	0	7.87	0	0	0	0	0	0	0	0	0	3.71	10.85	2.16	39.33	0.61	0	8.86	8.34	3.91	35.36	1.71	0.99	15.55	6.48	2.5	0	0	0	0
242	FBtr0076544	protein_coding_gene	FBgn0000116	Argk	Arginine kinase	CG32031	mRNA	FBtr0076544	Argk-RB		6.85	9.53	8.51	0	0	0	91.73	2.32	46.75	2.48	1.94	0	0	0	2.1	0.33	1.89	1.31	0	0	0	0	0.14	0	0	0.27	1.14	78.35	0	0	0.01	1.26	3.18	0	0.34	0	0	0	0
243	FBtr0076545	protein_coding_gene	FBgn0000116	Argk	Arginine kinase	CG32031	mRNA	FBtr0076545	Argk-RD		16.21	17.79	45.33	0	0	19.08	0	75.65	22.95	60.76	5.74	0	0	0	4.68	211.25	92.48	0	0	5.58	1.5	3.12	0	0	0	0	12.94	61.01	6.73	5.43	58.41	0	0	0.22	2.56	0	244.01	377.06	184.23
244	FBtr0076546	protein_coding_gene	FBgn0000116	Argk	Arginine kinase	CG32031	mRNA	FBtr0076546	Argk-RC		24.61	48.32	21.75	24.09	0.76	1.52	12.29	26.63	12.5	22.08	22.34	24.58	65.36	54.07	75.82	115.41	12.65	25.53	14.4	47.84	45.69	22.89	37.05	41.45	9.99	70.64	64.78	65.61	65.67	51.08	26.25	14.57	52.01	17.21	67.8	80.08	2.86	0.4	0
245	FBtr0112791	protein_coding_gene	FBgn0000116	Argk	Arginine kinase	CG32031	mRNA	FBtr0112791	Argk-RE		28.63	44.46	27.47	67.53	8.18	70.11	0	51.32	28.58	40.55	33.49	25.87	1.88	15.54	136.9	5.12	0	18.4	34.98	10.76	12.71	6.57	11.69	1.25	0.07	4.24	10.41	10.59	24.69	105.76	4.01	14.41	1.19	219.33	37.07	6.66	38.9	51.28	41.2
246	FBtr0331550	protein_coding_gene	FBgn0000116	Argk	Arginine kinase	CG32031	mRNA	FBtr0331550	Argk-RG		0	0	0	0	0	0	0	0	0	0	0	0	0	0	2.02	0	0	0	0	0	0	0	0	7.04	1.28	0	0	0	67.01	0	0	0	0.56	45.67	0.6	0	0	0	0
247	FBtr0345030	protein_coding_gene	FBgn0000116	Argk	Arginine kinase	CG32031	mRNA	FBtr0345030	Argk-RH		126.5	123.58	170.95	268.47	215.12	288.14	248.94	75.03	40.1	78.57	328.77	43.66	111.22	0	133.56	47.61	68.17	10.71	10.73	0.35	76.07	41.17	102.99	66.16	19.99	2.05	90.78	245.8	3	35.02	114.21	221.41	127.19	0	112.98	0	646.55	788.56	731.67
248	FBtr0089988	protein_coding_gene	FBgn0000117	arm	armadillo	CG11579	mRNA	FBtr0089988	arm-RE		0	0	0	0	99.82	97.23	34.52	0	0	0	0	151.1	0	0	0	8.96	0	0	0	59.55	0	0	0.72	2.61	10.21	0	0	0	2.32	0	0	0	0	118.25	0	0	0	0	0.69
249	FBtr0089989	protein_coding_gene	FBgn0000117	arm	armadillo	CG11579	mRNA	FBtr0089989	arm-RB		0	0	0	0	0	0	0	0	0	0	0	0	0	0	0	0	0	0	0	0	0	0	0	0	0	0	0	0	0	0	0	0	0	0	0	1.44	0	0	0
250	FBtr0089990	protein_coding_gene	FBgn0000117	arm	armadillo	CG11579	mRNA	FBtr0089990	arm-RC		95.26	81.51	87.6	89.26	0	0	44.72	100.3	108.11	72.45	30.55	7.88	17.99	0	143	183.67	37.08	3.11	79.67	0	18.21	96.22	38.83	113.83	119.72	100.79	35.2	59.81	100.37	87.84	101.2	28.3	50.47	0	116.36	0	50.64	60.52	58.35
251	FBtr0089991	protein_coding_gene	FBgn0000117	arm	armadillo	CG11579	mRNA	FBtr0089991	arm-RA		15.02	23.87	32.02	0	0.01	0.02	26.15	4.53	1.57	13.05	16.99	0.01	0	0	28.23	5.09	5.39	47.76	0	0	1.44	1.29	0	22.6	0	0.83	0	13.24	0	33.08	1.97	23.02	23.87	0.01	2.91	0.39	0	0	0
252	FBtr0089992	protein_coding_gene	FBgn0000117	arm	armadillo	CG11579	mRNA	FBtr0089992	arm-RD		5.67	5.74	3.76	0	0	0	0	9.3	1.41	16.31	8.13	0	28.89	62.58	0	0	0	1.49	0	0	48.2	0	0	9.78	0	254.05	5.34	2.39	0	2.51	1.84	20.65	0	0	0	0	0	0	0
253	FBtr0332583	protein_coding_gene	FBgn0000117	arm	armadillo	CG11579	mRNA	FBtr0332583	arm-RF		0.32	2.66	0	0.88	0	0	0	0	0.63	3.51	0	0	0	0	6.31	0	0	0	0	0	16.88	0	7.16	0	0	0	3.79	2.52	0	0	0	0	0	0	8.09	0.32	0	0	0
254	FBtr0087702	protein_coding_gene	FBgn0000119	arr	arrow	CG5912	mRNA	FBtr0087702	arr-RA		11.35	11.65	10.09	12.22	5.1	9.01	21.29	21.86	17.82	26.84	2.28	2.14	90.84	15.84	19.6	34.88	17.63	1.47	2.01	1.33	7.01	8.25	8.44	12.71	2.37	17.88	6.29	11.84	42.26	2.43	18.81	8.07	8.08	1.2	19.32	26.76	0.98	2.36	0.39
255	FBtr0081030	protein_coding_gene	FBgn0000120	Arr1	Arrestin 1	CG5711	mRNA	FBtr0081030	Arr1-RA		0	0	0	0	0	0	0	0	0	0	0	0	0	0	0	0	0	0	0	0	0	0	0	0	0	0	0	0	0	0	0	7.56	0	0	0	0	0	0	0
256	FBtr0307350	protein_coding_gene	FBgn0000120	Arr1	Arrestin 1	CG5711	mRNA	FBtr0307350	Arr1-RB		0	0	0	0	0	0	0	0	0	0	1.41	0	0	0	0	0	0	0	0	0	0	11.96	0.27	0.69	0	0	0.93	0	0	0	0	4.17	1.27	0	2.37	0.1	0	0	0
257	FBtr0340229	protein_coding_gene	FBgn0000120	Arr1	Arrestin 1	CG5711	mRNA	FBtr0340229	Arr1-RC		0	0	0	0	0	0	0	0	0	0	2.03	0	0	0	0	0	0	0	0	0	0	48.36	0	0	0	0	0	0	0	0	0	4.88	0	0	0	0	0	0	0
258	FBtr0076599	protein_coding_gene	FBgn0000121	Arr2	Arrestin 2	CG5962	mRNA	FBtr0076599	Arr2-RA		0	0	0	0	0	0	0	0	0	0	8.68	0	0	0	0	0	0	0	0	0	0	0	8.1	0	0	0	0	0	0	0	0	29.76	0	0	0.46	0	0	0	0
259	FBtr0070075	protein_coding_gene	FBgn0000137	ase	asense	CG3258	mRNA	FBtr0070075	ase-RA		0	0.22	0	0	0	0	1.05	0	0	0	0.06	0	0.08	0	0.16	0	0	0.07	0.42	0	0	0	1.26	0.46	0	0	0	0	0	0	0.77	0.05	0.2	0	6.98	0	0	0.69	0
260	FBtr0084659	protein_coding_gene	FBgn0000139	ash2	absent, small, or homeotic discs 2	CG6677	mRNA	FBtr0084659	ash2-RB		0.66	2.77	0	0.63	0	1.13	0	7.29	0.15	0	2.42	0	0	0	0	0	0	0	0	0	0	0	0	0.54	0	0	0	9.18	0	0.73	0	1.09	1.3	0	0.75	0	0	0	0
261	FBtr0084660	protein_coding_gene	FBgn0000139	ash2	absent, small, or homeotic discs 2	CG6677	mRNA	FBtr0084660	ash2-RC		3.61	3.37	0	0	1.21	0	2.03	0	2.28	3.52	0.2	0	0	0	0	0	5.38	0	0	0	0	0	0	0	11.19	0	24.88	0	0.17	0	0	0.22	0	0	0	0	0	0	0
262	FBtr0306171	protein_coding_gene	FBgn0000139	ash2	absent, small, or homeotic discs 2	CG6677	mRNA	FBtr0306171	ash2-RE		12.14	6.32	6.47	2.43	38.79	2.82	0	0	0	10.37	10.37	1.81	0	0	27.41	0	0	0	0	5.48	1.3	0	8.12	17.48	0	1.69	5.46	0	11.12	3.81	22.4	43.84	4.53	0.64	0	0	0	5.96	16.8
263	FBtr0084692	protein_coding_gene	FBgn0000140	asp	abnormal spindle	CG6875	mRNA	FBtr0084692	asp-RA		0.47	0.02	2.52	0	0	0	0	0.39	0	0	0.01	0	0	0	2.15	0	0	0	0	0	0	0	0	2.46	0	0	0.93	0	0.02	0	0	0	0	0	0	0	0	0	0
264	FBtr0080165	protein_coding_gene	FBgn0000146	aub	aubergine	CG6137	mRNA	FBtr0080165	aub-RA		0	0	0.08	0	0	0	0.08	0	0	0	0.19	0	0	0	0	0	0	0	0	0	0	0	0.05	0	0	0	0	0	0	0	0	0	1.84	0	0.04	0	0	0	0
265	FBtr0112793	protein_coding_gene	FBgn0000146	aub	aubergine	CG6137	mRNA	FBtr0112793	aub-RC		0.07	0.19	0	0	0	0	0	0.2	4.87	0	0	0	0	0	0	0	0	0	10.24	0	0.79	0	0	0	0.05	0	0.57	0	0	0	0	0	0	0.07	0	0	0	0	0.33
266	FBtr0082483	protein_coding_gene	FBgn0000147	aurA	aurora A	CG3068	mRNA	FBtr0082483	aurA-RA		4.59	11.9	10.34	0	0	0	0	2.56	0.07	7.41	3.9	0	0	0	1.4	0	5.87	4.33	0	0	4.86	5.19	1.15	50.32	0	111.56	6.31	1.67	0	0	0	5.84	4.03	0	6.76	0	7.02	9.94	3.84
267	FBtr0339146	protein_coding_gene	FBgn0000150	awd	abnormal wing discs	CG2210	mRNA	FBtr0339146	awd-RC		1.3	0.89	1.59	36.84	0	0	0	10.76	0	4.04	0	0	0	0	0	48.09	0	0	0	0	0	0	1.19	32.83	0	0	0	0	0	5.58	0	0	0	0	0	0	841.28	979.32	1014.96
268	FBtr0346150	protein_coding_gene	FBgn0000150	awd	abnormal wing discs	CG2210	mRNA	FBtr0346150	awd-RD		2.01	1.09	2.35	1.93	0	12.26	0	1.44	0.63	0	52.82	0	173.96	0	0	1.19	0	0	0	0	106.07	4.61	0	114.52	0	0	73.92	0	0	0	0	34.11	14.89	0	13.59	0	164.81	68.54	2.64
269	FBtr0346611	protein_coding_gene	FBgn0000150	awd	abnormal wing discs	CG2210	mRNA	FBtr0346611	awd-RE		19.75	7.85	10.73	111.82	0	78.13	44.31	16.7	26.17	30.39	98.96	1.77	326.13	0	28.83	77.72	0.3	5.68	1.68	38.9	0	0	0	0	0	0	0	17.18	2.42	33.09	5.93	0	0	0	0	0	206.89	167.68	0
270	FBtr0074372	protein_coding_gene	FBgn0000152	Axs	Abnormal X segregation	CG9703	mRNA	FBtr0074372	Axs-RA		1.31	0.55	0.37	0	0.04	0.81	0	0.97	0.08	0.09	0.66	0	0	0	1.01	0	0	3.08	0	0	0.55	0	0.08	7.83	6.22	0.86	0.71	1.85	0.21	0	0.4	5.56	6.63	8.07	1.1	0.09	0	0	0
271	FBtr0080542	protein_coding_gene	FBgn0000153	b	black	CG7811	mRNA	FBtr0080542	b-RA		0.03	0	0.62	0	0	0.04	0	0.11	0	0	0	0	0	0	0	0	0	0	0	0	0	0	0.06	0	0	0	0	0	0	0.96	0	0	0	0	0	0.06	0	0	0
272	FBtr0309960	protein_coding_gene	FBgn0000153	b	black	CG7811	mRNA	FBtr0309960	b-RB		0	0.67	0	0	0	0	0.42	0	0	0.35	0.28	0	0	0	0	0	0	0	0	0	8.85	0	0.49	0	0	0	0	0	0	0	0.1	4.43	0.33	0	0	0	0	0	0
273	FBtr0342712	protein_coding_gene	FBgn0000153	b	black	CG7811	mRNA	FBtr0342712	b-RC		0.03	0	0.62	0	0	0.04	0	0.11	0	0	0	0	0	0	0	0	0	0	0	0	0	0	0.06	0	0	0	0	0	0	0.96	0	0	0	0	0	0.06	0	0	0
274	FBtr0072378	protein_coding_gene	FBgn0000157	Dll	Distal-less	CG3629	mRNA	FBtr0072378	Dll-RB		0.14	0.05	0.22	0	0	0	0	0	0	0.28	1.96	0	0	0	0	0	0	0	0	0	0	0	0	0	0	0	0	0	0	0	0	15.06	0	0	0	0	0	0	0
275	FBtr0072379	protein_coding_gene	FBgn0000157	Dll	Distal-less	CG3629	mRNA	FBtr0072379	Dll-RA		0	0	0	0	0	0	0	0.56	0	0	10.04	0	0.12	0	0	0	0	0.14	0	0	0	0.47	14.87	0	0	0	14.77	0	0	0	0	20.93	0	0.98	3.66	0	0	0	0
276	FBtr0300076	protein_coding_gene	FBgn0000157	Dll	Distal-less	CG3629	mRNA	FBtr0300076	Dll-RC		0	0	0	0	0	0	0	0	0	0	0.39	0	0	0	0	0	0	0	0	0	0	0	0	0	0	0	0	0	0	0	0	0.77	0	0	0	0	0	0	0
277	FBtr0084869	protein_coding_gene	FBgn0000158	bam	bag of marbles	CG10422	mRNA	FBtr0084869	bam-RA		0.11	0.28	2.3	0	0.1	0.36	2.09	0	0	0	0	0	0	0	0	0	0.14	0	0	0	0	0	0	2.48	0	0	0	0	0	0	0	0.06	0	0	0	0	0	0	0
278	FBtr0074388	protein_coding_gene	FBgn0000163	baz	bazooka	CG5055	mRNA	FBtr0074388	baz-RA		0	0	0	0	0	0	0	0.98	2.1	1.43	0.08	0	0	0	0	0	0	0	0	0	0	0	0.09	1.27	0	0	2.29	0	0	0	0	1.88	0	0	0	0	0	0	0
279	FBtr0111000	protein_coding_gene	FBgn0000163	baz	bazooka	CG5055	mRNA	FBtr0111000	baz-RB		0	0	0	0	0	0	0	0	0	0	0	0	0	0	0	0	0	0	0	0	0	0	0	0	0	0	0	0	0	0	0	0	0	0	0	0	0	0	0
280	FBtr0343763	protein_coding_gene	FBgn0000163	baz	bazooka	CG5055	mRNA	FBtr0343763	baz-RC		0	0.06	0.07	0	0	0	0	0.58	0	0	0	0	0	0	0	0.02	0.35	0.4	0	0	0.45	0	0	0	14.04	9.58	0	0	0	0	0	0	0.01	0	0.03	0.69	0	0	0
281	FBtr0343764	protein_coding_gene	FBgn0000163	baz	bazooka	CG5055	mRNA	FBtr0343764	baz-RD		0	0	0	0	0	0	0	0.07	0.58	0.65	0.03	0.15	0	0	0	0	0	0	0	0	0	0	0	2.48	0	0	0.57	0	0	0	0	0	0	0	0	0	0	0	0
282	FBtr0081664	protein_coding_gene	FBgn0000166	bcd	bicoid	CG1034	mRNA	FBtr0081664	bcd-RA		0.18	0	0.34	0	0	0.43	0	0.01	0.31	0.44	0	0	0.35	0	0	0	0.19	0	0	0	0.23	0	0	0	0.97	0.23	0	0	0.86	0.08	0.29	0.25	0	0.14	0	1.47	0	0	0
283	FBtr0081665	protein_coding_gene	FBgn0000166	bcd	bicoid	CG1034	mRNA	FBtr0081665	bcd-RD		0	0	0	0	0	0	0	0	0	0	0	0	0	0	0	0	0	0	0	0	0.9	0	0.03	0	0	0.34	0	0	0	0	0	0	0	0	0	0	0	0	0
284	FBtr0081666	protein_coding_gene	FBgn0000166	bcd	bicoid	CG1034	mRNA	FBtr0081666	bcd-RE		0.26	0.62	0	0.41	0	0	0	0.19	0	0	0.13	0	0	0	0	0.17	0	0	0	0	0	0.16	0	0	0	0	0.16	0	0	0	0	0	0.58	0	0.91	0	0	0	0
285	FBtr0081667	protein_coding_gene	FBgn0000166	bcd	bicoid	CG1034	mRNA	FBtr0081667	bcd-RF		0	0.02	0	0.1	0	0	0	0	0	0.19	0	0	0	0	0	0	0	0	0	0	0	0	0	0	0	0	0	0.31	0.18	0	0	0	0	0	0	0	0	0	0
286	FBtr0081668	protein_coding_gene	FBgn0000166	bcd	bicoid	CG1034	mRNA	FBtr0081668	bcd-RG		0	0	0	0	0	0	0	0	0	0	0	0	0	0	0	0	0	0	0	0	0	0	0	0	0	0	0	0	0	0	0	0	0	0	0	0	0	0	0
287	FBtr0073855	protein_coding_gene	FBgn0000173	ben	bendless	CG18319	mRNA	FBtr0073855	ben-RA		0	0	0	0	0	0	9.67	22.76	5.95	0	0	0	0	0	0	0	11.31	3.08	47.08	10.05	29.45	73.69	0	43.62	0	0	0	0	0	0	0	0	10.59	0	0	0	55.86	50.61	51.95
288	FBtr0300566	protein_coding_gene	FBgn0000173	ben	bendless	CG18319	mRNA	FBtr0300566	ben-RB		77.23	77.94	73.61	0	0	11.7	44.6	13.79	0	45.47	58.42	0	81.51	0	56.63	32.49	10.49	0	14.27	2.81	26.82	56.56	45.04	0	25.48	29.47	190.69	51.27	25.05	36.75	66.51	64.07	48.53	2.9	60.17	0	127.69	292.38	241.59
289	FBtr0307296	protein_coding_gene	FBgn0000173	ben	bendless	CG18319	mRNA	FBtr0307296	ben-RC		0	4.65	7.29	0	0	0	0	0	0	0	46.52	0	25.66	0	12.56	0	0	0	0	0	63.52	40.31	59.34	63.5	30.41	0	103.53	0	0	0	0	57.02	33.67	0	50.88	0	0	0	0
290	FBtr0332843	protein_coding_gene	FBgn0000173	ben	bendless	CG18319	mRNA	FBtr0332843	ben-RD		0	9.55	2.66	0	0	3.84	0	0	0	0	0	0	6.25	0	3.48	0	0	0	0	0	0	0	10.85	0	0	0	2.57	0	0	2.53	4.7	0	0.76	0	0	0	0	0	0
291	FBtr0332844	protein_coding_gene	FBgn0000173	ben	bendless	CG18319	mRNA	FBtr0332844	ben-RE		19.06	9.13	19.34	15.37	35.99	42.39	0	0	4.88	29.85	0	45.19	34.22	39.72	0	14.66	0	32.57	0	7.27	0	0	0	0	0	30.66	8.18	10.11	6.38	23.66	8.74	0	0	5.49	0	36.5	0	0	0
292	FBtr0070672	protein_coding_gene	FBgn0000179	bi	bifid	CG3578	mRNA	FBtr0070672	bi-RA		0	0	0	17.75	0	0	0	0	0.05	0	0	16.49	0	0	0.05	0	0	0	3.66	0	0	0	0	0	0	0	0	0	0	0	0	0	0	13.68	0	1.91	0	0	0
293	FBtr0300608	protein_coding_gene	FBgn0000179	bi	bifid	CG3578	mRNA	FBtr0300608	bi-RB		0	0	0	0	0	0	0	0	0	0	0	0	0	0	0	0	0	0	0	0	0	0	0	0	0	0	0	0	0	0	0	0	0	0	0	0	0	0	0
294	FBtr0300609	protein_coding_gene	FBgn0000179	bi	bifid	CG3578	mRNA	FBtr0300609	bi-RC		0.06	0.41	0	0	0	0	0	0	0	0	2.38	0	0	0	0	0	0.61	1.32	0	6.1	0.52	0	1.84	0	1.19	1.55	0	0	0	0.06	0	3.89	0.06	0	0	0	0	0	0
295	FBtr0308914	protein_coding_gene	FBgn0000179	bi	bifid	CG3578	mRNA	FBtr0308914	bi-RD		0	0	0	0	0	0	0	0	0	0	0.91	0.01	0	0	0	0	0	0	7.17	0.93	0	0	1.88	0	0	0	0	0	0	0	0	0	0	0	0	0	0	0	0
296	FBtr0308915	protein_coding_gene	FBgn0000179	bi	bifid	CG3578	mRNA	FBtr0308915	bi-RE		0.86	0	0.11	2.82	0	3.36	0.74	1.11	0	0.89	0	2.91	6.96	2.49	0.56	0	1.48	1.39	0	0	0	0	0.03	0.1	0.39	0.05	1.32	0	0	0.04	0	0	0	0	1.02	0.16	0	0	0
297	FBtr0331162	protein_coding_gene	FBgn0000179	bi	bifid	CG3578	mRNA	FBtr0331162	bi-RF		0	0	0	0	0	0	0	0	0	0	0	0	0	0	0	0	0	0	0	0	0	0	0	0	0	0	0	0	0	0	0	0	0	0	0	0	0	0	0
298	FBtr0343569	protein_coding_gene	FBgn0000179	bi	bifid	CG3578	mRNA	FBtr0343569	bi-RG		0	3.88	0	0	0	0	0	0	0	0	7.89	0	0	0.93	0	0	0	0	0	0	0.09	0	40.63	0	0	0	0	0	0	0	0	3.58	5.28	0	0	0	0	0	0
299	FBtr0079929	protein_coding_gene	FBgn0000180	bib	big brain	CG4722	mRNA	FBtr0079929	bib-RA		0	0.02	0.1	0.03	0	0.01	0	0.35	0	0.22	0.66	0	11.42	0	0.36	0	0.02	1.19	3.97	0	0.18	6.1	0.47	0	0	0	4.37	11.66	1.47	7.35	9.64	2.73	1.48	0	8.72	0.87	0	0	0
300	FBtr0329984	protein_coding_gene	FBgn0000180	bib	big brain	CG4722	mRNA	FBtr0329984	bib-RB		0	0.02	0.1	0.03	0	0.01	0	0.35	0	0.22	0.66	0	11.42	0	0.36	0	0.02	1.19	3.97	0	0.18	6.1	0.47	0	0	0	4.37	11.66	1.47	7.35	9.64	2.73	1.48	0	8.72	0.87	0	0	0
301	FBtr0087782	protein_coding_gene	FBgn0000181	bic	bicaudal	CG3644	mRNA	FBtr0087782	bic-RA		211.41	187.54	184.04	113.58	81.18	72.03	38.84	132.74	51.36	96.42	135.75	102.57	165.39	37.71	70.31	79.32	19.26	37.67	81.53	23.26	138.05	113.09	104.51	136.26	83.98	23.02	123.68	50.48	45.97	52.3	52.5	100.46	98.24	14.94	103.02	65.98	96.93	90.28	83.03
302	FBtr0087783	protein_coding_gene	FBgn0000181	bic	bicaudal	CG3644	mRNA	FBtr0087783	bic-RB		187.96	225.18	213.9	62.46	0	135.5	200.04	366.95	350.19	307.59	331.15	10.29	90	505.67	295.68	178.71	0	125.51	1.09	0	301.24	139.21	275.14	214.35	10.5	19.55	323.92	142.36	29.11	262.79	185.82	251.81	218.28	0	557.34	0	50.25	44.84	29.43
303	FBtr0080803	protein_coding_gene	FBgn0000182	BicC	Bicaudal C	CG4824	mRNA	FBtr0080803	BicC-RA		0	0	0	0	0	0	0	0	0	0	0.04	0	0	0	0.06	0	0	0	0	0	0	0	0	0	0	0.12	0.2	0	0	0	0	0.38	0.02	0	0.25	0	0	0	0
304	FBtr0080804	protein_coding_gene	FBgn0000182	BicC	Bicaudal C	CG4824	mRNA	FBtr0080804	BicC-RB		0	0	0	0	0	0	0	0	0	0	0	0	0	0	0	1	0	0	0	0	0	0	0	0	0	0	0	0	0	0	0.03	0.58	0.15	0	0	0	0	0	0
305	FBtr0080805	protein_coding_gene	FBgn0000182	BicC	Bicaudal C	CG4824	mRNA	FBtr0080805	BicC-RD		0	0	0	0	0	0	0	0	0	0	0	0	0	0	0	14.44	0	0	0	0	0	0	0	0	0	0	0	0	0	0	0	0	0	0	0.12	0	0	0	0
306	FBtr0081002	protein_coding_gene	FBgn0000183	BicD	Bicaudal D	CG6605	mRNA	FBtr0081002	BicD-RA		23.24	16.06	15.93	1.83	0	0	0	12.02	2.48	7.96	8.34	0	0	0	5.54	0	0	0	0	0	13.15	0	13.65	0	0	0	2.85	19.81	0.27	2.29	20.45	0.39	0	0	2.27	0	2.18	0.33	0
307	FBtr0305688	protein_coding_gene	FBgn0000183	BicD	Bicaudal D	CG6605	mRNA	FBtr0305688	BicD-RB		16.81	33.75	22.02	1.12	0.04	26.62	0.25	16.74	24.07	29.57	7.52	0.23	0	3.96	83.55	69.7	0.15	40.11	0	4.29	10.08	0	5.83	0	7.76	0	9.72	11.42	5.77	57.77	0.46	12.92	0.18	0	13.31	0	0	0	1.2
308	FBtr0330225	protein_coding_gene	FBgn0000183	BicD	Bicaudal D	CG6605	mRNA	FBtr0330225	BicD-RC		28.04	51.79	42.69	20.8	72.57	21.37	86.82	46.07	18.97	39.6	16.38	63.63	81.61	89.13	27.3	35.45	25.55	48.66	75.3	18.12	40.83	51.43	54.04	49.35	54.56	55.25	15.95	19.25	24.28	19.48	25.91	16.69	44.99	31.43	40.69	242.59	0.44	0.74	0.68
309	FBtr0330226	protein_coding_gene	FBgn0000183	BicD	Bicaudal D	CG6605	mRNA	FBtr0330226	BicD-RD		23.24	16.06	15.93	1.83	0	0	0	12.02	2.48	7.96	8.34	0	0	0	5.54	0	0	0	0	0	13.15	0	13.65	0	0	0	2.85	19.81	0.27	2.29	20.45	0.39	0	0	2.27	0	2.18	0.33	0
310	FBtr0084949	protein_coding_gene	FBgn0000206	boss	bride of sevenless	CG8285	mRNA	FBtr0084949	boss-RA		0	0	0	0	0	0	0	0	0	0	0.07	0	0	0	0	0	0	0	0	0	0	0	0	0	0	0	0	0	0	0	0	0.21	2.49	0	0	0	0	0	0
311	FBtr0075523	protein_coding_gene	FBgn0000212	brm	brahma	CG5942	mRNA	FBtr0075523	brm-RC		3.36	17.35	10.41	0	0.04	0	0.15	12.34	0.05	0.03	2.68	0	0	0.01	0.04	0.02	0	0	0	0.01	3.05	0	1.33	10.08	0	0	0.05	0.09	0.05	0	11.95	3.05	0	0	0.01	0.01	0	0	0.05
312	FBtr0075524	protein_coding_gene	FBgn0000212	brm	brahma	CG5942	mRNA	FBtr0075524	brm-RD		0	1.73	4.28	0	23.4	0	61.27	0	27.42	4.89	0	0	4.19	13.56	0	17.45	1.2	0	4.03	7.55	0	2.42	0	0	1.38	0	1.56	21.38	43.55	40.32	1.49	0	3.5	0	5.3	17.34	0.53	0.18	12.21
313	FBtr0075525	protein_coding_gene	FBgn0000212	brm	brahma	CG5942	mRNA	FBtr0075525	brm-RA		16.03	7.25	4.95	10.36	0	13.08	11.16	7.94	0	0	0.66	0.95	0	0	0.37	0	0	0	0	0	0	0	0	0	0	12.48	3.69	0	0	10.05	6.86	0	0	0	0	0	0	0	0
314	FBtr0075526	protein_coding_gene	FBgn0000212	brm	brahma	CG5942	mRNA	FBtr0075526	brm-RB		3.42	4.6	3.54	0	0	0	0	11.03	0	23.8	4.98	0	0	0	33.91	0	0	6.37	0	0	3.99	0	1.39	0	0	0	1.04	2.86	0	0	11.63	10.61	0	0	0	0	0	0	0
315	FBtr0330160	protein_coding_gene	FBgn0000212	brm	brahma	CG5942	mRNA	FBtr0330160	brm-RE		16.03	7.25	4.95	10.36	0	13.08	11.16	7.94	0	0	0.66	0.95	0	0	0.37	0	0	0	0	0	0	0	0	0	0	12.48	3.69	0	0	10.05	6.86	0	0	0	0	0	0	0	0
316	FBtr0333580	protein_coding_gene	FBgn0000212	brm	brahma	CG5942	mRNA	FBtr0333580	brm-RF		0	0	0	0	0	0	0	0	0	0	0	0	0	0	0	0	0	0	0	0	0	0	0	0	0	0	0	0	0	0	0	0	0	0	0	0	0	0	0
317	FBtr0075621	protein_coding_gene	FBgn0000216	Brd	Bearded	CG3096	mRNA	FBtr0075621	Brd-RA		0	0	0	0	0	0	0	0	0	0	0	0	0	0	0	0	0	0	0	0	0	0	0	0	0	0	0	0	0	0	0	0	0	0	0	0	0	0	0
318	FBtr0070638	protein_coding_gene	FBgn0000221	brn	brainiac	CG4934	mRNA	FBtr0070638	brn-RA		0.07	3.84	1.54	0.28	0	0	0	0.1	0	0	0.81	0	0	0	0.1	0	0	0	0	0	1.67	0	0.69	0	0	0	0	12.65	0	3.67	0	0	0	0	2.45	0	5.76	1.77	0.94
319	FBtr0077423	protein_coding_gene	FBgn0000227	Bsg25A	Blastoderm-specific gene 25A	CG12205	mRNA	FBtr0077423	Bsg25A-RA		0	0	0	0	0	0	0	0	0	0	0	0	0	0	0	0	0	0	0	0	0	0	0	0	0	0	0	0	0	0	0	0	0	0	0	0	0	0	0
320	FBtr0079084	protein_coding_gene	FBgn0000228	Bsg25D	Blastoderm-specific gene 25D	CG14025	mRNA	FBtr0079084	Bsg25D-RB		0	0	0	0	0	0	0	4.78	0	0	0	0	0	0	0	7.21	0	0	0	0	0	0	0	0	0	0	0	0	0	0	0	0	0	0	0	0	0	0	0
321	FBtr0079085	protein_coding_gene	FBgn0000228	Bsg25D	Blastoderm-specific gene 25D	CG14025	mRNA	FBtr0079085	Bsg25D-RC		14.22	14.35	9.14	9.37	1.77	10.31	0	0	8.49	13.78	4.21	29.95	0	79.54	19.76	7.85	0.93	3.42	21.42	7.47	43.12	9.67	19.85	11.72	2.87	0.5	14.63	0.6	3.53	0	8.43	14.72	18.51	9.37	12.37	26.48	2.77	1.65	3.33
322	FBtr0302567	protein_coding_gene	FBgn0000228	Bsg25D	Blastoderm-specific gene 25D	CG14025	mRNA	FBtr0302567	Bsg25D-RD		3.87	9.32	0.37	5.4	5.2	6.53	0	0	0.23	0.62	0.85	7.86	0	0	4.66	0	0	0.21	0	0	1.18	0	1.11	0	0	98.85	14.02	6.83	12.02	0.5	0	11.27	8.4	0	0.05	0	0	4.06	0
323	FBtr0302568	protein_coding_gene	FBgn0000228	Bsg25D	Blastoderm-specific gene 25D	CG14025	mRNA	FBtr0302568	Bsg25D-RE		0	9.45	15.02	1.98	0	0.34	0	6.15	2.36	0	2.71	0	0	0	0	0	0	0	0	0	4.58	0	0	5.45	0	0	6.62	8.28	0	1.77	0	5.93	0	0	3.63	0	0	0	0
324	FBtr0310624	protein_coding_gene	FBgn0000228	Bsg25D	Blastoderm-specific gene 25D	CG14025	mRNA	FBtr0310624	Bsg25D-RF		5.05	0	0	0	0	0	1.86	0.42	0	3.82	0	4.96	1.94	0	5.2	0	1.41	5.6	0	0.28	3.56	1.03	0.7	0	0	1.64	0	0	0	17.39	0.71	0	1.9	0	4.88	0	2.37	1.97	0
325	FBtr0310625	protein_coding_gene	FBgn0000228	Bsg25D	Blastoderm-specific gene 25D	CG14025	mRNA	FBtr0310625	Bsg25D-RG		0	0	0	0	0	0	0	0	0	0	2.35	0	0	0	0	0	0	0	0	0	0	0	0	0	0	0	0	0	0.19	0	0	0	0	0	0	0	0	0	0
326	FBtr0342939	protein_coding_gene	FBgn0000228	Bsg25D	Blastoderm-specific gene 25D	CG14025	mRNA	FBtr0342939	Bsg25D-RH		0	0	0	0	0	0	0	2.54	0	0	0	0	0	0	0	0.1	0	0	0	0	0	0	0	0	0	0	0	0	0	0	0	0	0	0	0	0	0	0	0
327	FBtr0080087	protein_coding_gene	FBgn0000229	bsk	basket	CG5680	mRNA	FBtr0080087	bsk-RB		65.35	75.96	31.01	130.23	14.18	139.54	137.52	35.96	41.19	16.2	19.84	13.05	7.5	1.64	4.59	37.57	29.58	85.06	54.76	38.62	91.17	82.62	15.9	77.49	83.52	3.9	28.59	24.87	55.31	94.93	28.79	25.6	63.03	12.34	40.82	401.37	126.38	108.24	163.88
328	FBtr0300982	protein_coding_gene	FBgn0000229	bsk	basket	CG5680	mRNA	FBtr0300982	bsk-RE		0	0	0	0	0	0.55	0	0	0	0	0	0	0	0	0	0	0	11.31	0	4.59	0	0	0	0	13.49	36.36	0	0	0	1.48	0	0	0	0	0	0	0	0	4.99
329	FBtr0302378	protein_coding_gene	FBgn0000229	bsk	basket	CG5680	mRNA	FBtr0302378	bsk-RF		19.45	28.26	60.19	21.52	1.01	0	74.73	18.78	18.61	53.53	15.76	0	4.43	0	30.85	0	0	2.88	0	0	161.3	12.16	7.97	37.51	0	0	30.29	39.88	1.62	0.74	20.02	28.35	33.82	0	75.33	0	11.45	19.2	0
330	FBtr0071379	protein_coding_gene	FBgn0000233	btd	buttonhead	CG12653	mRNA	FBtr0071379	btd-RA		0	0	0	0	0	0	0	2.96	0.03	0.04	0.43	0	0	0	0	0	0	0	0	0	0	0	0	0	0	0	0	0	0	0	0.04	5.47	0.06	0	0.04	0	0	0	0
331	FBtr0301342	protein_coding_gene	FBgn0000239	bur	burgundy	CG9242	mRNA	FBtr0301342	bur-RB		16.21	20.31	14.54	16.32	7.71	0.4	0	20.7	38.55	21.48	0	11.6	53.63	7.39	10.19	17.31	0.23	3.45	0.44	14.83	0	0	0	0	8.31	1.44	0	27.23	6.53	13.71	19.67	8.08	0	0	0	3	0	7.05	0
332	FBtr0343875	protein_coding_gene	FBgn0000239	bur	burgundy	CG9242	mRNA	FBtr0343875	bur-RC		13.79	13.59	14.91	12.14	0	4.5	22.93	19.48	0.47	1.13	13.92	0.63	66.86	0	6.2	0.57	0	3.68	0	0.64	40.27	13.06	2.67	20.14	1.11	0	17.6	1.17	0	2.64	1.94	17.65	22.39	0	26.71	0	2.81	0	2.36
333	FBtr0072117	protein_coding_gene	FBgn0000241	bw	brown	CG17632	mRNA	FBtr0072117	bw-RA		0	0	1	0.04	0	0	0.06	0	0	0	0.2	0.33	0	0	0.12	0	1.88	0	1.63	0	3.69	0	0.9	1.06	3.66	0	1.22	0	0	0	0.73	0	1.03	0.41	4.43	0	0	0	0
334	FBtr0346612	protein_coding_gene	FBgn0000241	bw	brown	CG17632	mRNA	FBtr0346612	bw-RD		0.16	0.13	0	0	0	0	0	0.06	0	0.65	0	0	0	0	0	0	0	0	0	0	0	0	0	0	0	0	0	0.05	0	0	0	0	0	0	0	0.09	0	0	0
335	FBtr0082119	protein_coding_gene	FBgn0000244	by	blistery	CG9379	mRNA	FBtr0082119	by-RA		1.51	0	0.03	0	0	1.12	0	0	0	0.1	2.92	0	0	0	0	0	0	0	0	0	0	0	0.14	0	0	10.38	6.87	0	0	0	0	1.51	0	0	0.11	0	0	0	0
336	FBtr0301093	protein_coding_gene	FBgn0000244	by	blistery	CG9379	mRNA	FBtr0301093	by-RC		1.3	1.01	0	0	0	0	0	1.35	0	0.7	0	0	4.77	0.52	0	0	0	0	0	0	0	4.49	0.2	0.14	0	0	0.09	0.08	0.03	0.8	0	0	0	0	0.44	0	0	0	0
337	FBtr0302382	protein_coding_gene	FBgn0000244	by	blistery	CG9379	mRNA	FBtr0302382	by-RD		0.56	0	0.16	0	0	0	0	0.02	0	0	0	0	0	0.06	0.41	0	0	0	0	0	0.2	0	0	0	0	0	0	0	0	0	0	0	14.52	0	0	0	0	0	0
338	FBtr0083194	protein_coding_gene	FBgn0000246	c(3)G	crossover suppressor on 3 of Gowen	CG17604	mRNA	FBtr0083194	c(3)G-RA		0	0	0	0	0	0	9.05	0	0.12	0	1.48	0	0	1.17	0	0	0	0	0	0	0	0	11.19	0	9.71	0	1.59	0.1	0	0	0	3.65	0	0	11.07	0	0	0	0
339	FBtr0083195	protein_coding_gene	FBgn0000246	c(3)G	crossover suppressor on 3 of Gowen	CG17604	mRNA	FBtr0083195	c(3)G-RB		3.26	2.34	4.69	2.85	0	0	10.52	1.77	0	4.16	0	0.52	0	0	11.36	3.01	0	0.17	0	0	1.15	1.12	0	0	0	7.45	0	0	11.37	6.21	0.24	1.38	0.77	0.74	0	0.09	0	0.78	1.93
340	FBtr0083196	protein_coding_gene	FBgn0000246	c(3)G	crossover suppressor on 3 of Gowen	CG17604	mRNA	FBtr0083196	c(3)G-RC		0	2.9	0	0	0	0	0	0	0	0	0.36	0	0	0	0	0	0	0	0	0	0	0	0	5.3	0	0	0	0	0	0	0	0	0	0	0	0	0	0	0
341	FBtr0085484	protein_coding_gene	FBgn0000247	ca	claret	CG31037	mRNA	FBtr0085484	ca-RA		7.9	2.26	6.36	0	0	0	0.17	2.36	0.3	8.13	6.12	0	18.41	0	5.15	1.1	5.15	0.52	1.54	0.41	11.13	10.66	15.71	18.4	1.93	17.79	10.7	6.38	0.19	0.85	2.45	5.53	18.46	0	12.54	0	0.08	0	0
342	FBtr0346613	protein_coding_gene	FBgn0000247	ca	claret	CG31037	mRNA	FBtr0346613	ca-RC		40.25	59.67	46.87	26.49	6.32	11.2	11.81	53.42	44.88	39.24	1.61	0.91	7.79	78.01	62.02	32.22	0	8.99	18.56	1.77	2.59	3.75	4.3	0	0.54	0	14.62	27.45	36.23	22.44	17.85	3.82	59.71	35.57	3.6	0.84	0	0	0.69
343	FBtr0080844	protein_coding_gene	FBgn0000250	cact	cactus	CG5848	mRNA	FBtr0080844	cact-RA		0	0	0	0	0	0	0	0	0	0	0	0	0	0	0	0	0	0	0	0	0	0	0	0	0	13.15	0	0	0	0	0	0	0	0.74	0	0	0.48	0	2.27
344	FBtr0080845	protein_coding_gene	FBgn0000250	cact	cactus	CG5848	mRNA	FBtr0080845	cact-RB		2.78	11.53	34.51	36.61	1.04	0	0.24	86.71	104.36	46.19	1.77	0	0	0	0	0	86.82	2.09	1.46	0	0.36	2.68	2.78	0.32	0	0	52.76	25.36	0	12.17	64.46	31.72	30.09	0	13.7	0	0	0	0
345	FBtr0080846	protein_coding_gene	FBgn0000250	cact	cactus	CG5848	mRNA	FBtr0080846	cact-RC		89.19	128.15	120.74	73.71	8.17	29.98	34.6	97.9	92.04	106.86	19.82	25.62	22.86	2.62	47.81	56.43	16.66	1.16	21.81	3.29	52.22	39.54	15.18	94.57	13.89	9.94	18.26	22.91	25.67	11.5	20.19	7.41	24.59	30.01	49.58	21.82	13.47	11.08	12.69
346	FBtr0080847	protein_coding_gene	FBgn0000250	cact	cactus	CG5848	mRNA	FBtr0080847	cact-RD		12.73	21.9	15.59	3.38	0	0.07	6.46	7.91	3.17	3.32	7.43	0.07	15.93	0	13.31	2.28	0.34	5.67	0.08	1.74	9.29	12.88	0.97	43.86	0	2	11.32	6.78	26.52	1.2	6.35	5.21	3.75	0	18.97	0.15	0	0	0
347	FBtr0337081	protein_coding_gene	FBgn0000250	cact	cactus	CG5848	mRNA	FBtr0337081	cact-RE		0	0	0.27	0	0	0	0	0.11	0	0	0	0	0	0	0	0	0	0	0	0	0	0	0	0	1.94	0	0	0	0	0	0	0	0	0	0	0	0	0	0
348	FBtr0081412	protein_coding_gene	FBgn0000251	cad	caudal	CG1759	mRNA	FBtr0081412	cad-RA		0	0.09	0	0	0	0	0	0	0	0.24	0.06	0	0	0	0	0	0	0	0	0	0	0	0	0	0	0	48.4	0	0	0	0	0	0.15	0	0	0	0	0	0
349	FBtr0081413	protein_coding_gene	FBgn0000251	cad	caudal	CG1759	mRNA	FBtr0081413	cad-RB		0	0	0	0	0	0	0	0	0	0	0	0	0	0	0.23	0	0	0	0	0	1.37	0	0.03	0.07	0	0	0	0	0	0	0	0	0	0	0.25	0	0	0	0
350	FBtr0335152	protein_coding_gene	FBgn0000251	cad	caudal	CG1759	mRNA	FBtr0335152	cad-RC		0	0	0	0	0	0	0	0	0	0	0	0	0	0	0	0	0	0	0	0	0	0	0	0	0	0	0	0	0	0	0	0	0	0	0	0	0	0	0
351	FBtr0088001	protein_coding_gene	FBgn0000253	Cam	Calmodulin	CG8472	mRNA	FBtr0088001	Cam-RA		243.59	242.73	101.42	82.47	179.23	256.37	262.33	399.46	359.74	178.63	1270.02	0	3068.12	0	219.74	109.19	0	104.41	0.13	0	2302.59	1828.94	3715.98	2547.02	4990.62	0	1310	63.98	0	73.2	89.75	987.75	1671.83	191.87	819.69	0	2568.28	2081.96	2408.54
352	FBtr0088002	protein_coding_gene	FBgn0000253	Cam	Calmodulin	CG8472	mRNA	FBtr0088002	Cam-RB		0	0	0	0	393.49	0	0	0	0	0	0	0	25.06	0	0	0	0	0	0	0	182.22	594.99	0	0	0	0	169.45	0	0	50.65	0	0	203.43	0	429.36	0	2062.89	2805.11	3210.16
353	FBtr0304963	protein_coding_gene	FBgn0000253	Cam	Calmodulin	CG8472	mRNA	FBtr0304963	Cam-RC		120.91	127.44	144.87	323.52	150.63	215.68	268.89	199.19	66.07	197.41	181.91	1072.61	868.73	867.17	180.81	273.75	383.75	307.14	784.98	683.24	904.53	619.3	391.27	998.72	806.62	393.56	333.59	131.31	159.47	131.31	163.89	189.49	404.93	321.98	302.74	857.82	277.14	194	306.74
354	FBtr0304964	protein_coding_gene	FBgn0000253	Cam	Calmodulin	CG8472	mRNA	FBtr0304964	Cam-RD		781.03	943.43	906.94	787.02	537.48	1124.17	1005	1412.57	602.38	982.88	317.48	2755.92	2562.49	2004.96	403.73	412.89	2018.5	814.46	2528.23	1836.9	1811.24	2062.4	2235.78	1004.82	5066.7	2301.1	703.31	664.26	644.96	736.54	471.71	613.83	839.47	2734.85	452.84	2113.16	208.47	132.09	179.59
355	FBtr0345018	protein_coding_gene	FBgn0000253	Cam	Calmodulin	CG8472	mRNA	FBtr0345018	Cam-RE		1050.17	1095.29	1103.18	1564.03	394.83	1470.59	2025.04	1546.17	762.09	1308.55	21.05	4216.38	26.29	2955.21	849.29	846.65	2754.29	1408.92	7156.48	2803.35	25.71	23.98	193.47	56.37	208.65	1575.82	25.85	941.76	1071.35	557.2	560.18	19.93	18.55	3535.17	4.58	4834.65	18.96	10.09	40.12
356	FBtr0077511	protein_coding_gene	FBgn0000256	capu	cappuccino	CG3399	mRNA	FBtr0077511	capu-RD		7.12	10.06	10.79	4.56	0.91	0	0.05	10.55	8.94	5.45	3.8	2.32	5.72	1.39	6.3	18.71	0.09	6.29	0	2.47	8.17	1.9	4.17	3.96	2.66	0.48	8.37	16.31	9.44	5.96	7.98	5.94	4.42	0	8.35	0	6.69	5.01	3.48
357	FBtr0077512	protein_coding_gene	FBgn0000256	capu	cappuccino	CG3399	mRNA	FBtr0077512	capu-RB		0	0	0	0	0	0	0	0	0	0	0	0	0	0	0	0	0	0	0	0	0	0	0	0	0	0	0	0	0	0	0	0	0	0	0	0	0	0	0
358	FBtr0077513	protein_coding_gene	FBgn0000256	capu	cappuccino	CG3399	mRNA	FBtr0077513	capu-RA		0	0.31	0	1.08	1.05	0	0	0.22	1.29	0	0.05	0.51	0	0	0.79	0	0	3.53	0.39	22.54	0	1.73	0.04	1.09	0	0	0	0	0	0	1.62	0	0.35	0	0.54	0	0	0	0
359	FBtr0290077	protein_coding_gene	FBgn0000256	capu	cappuccino	CG3399	mRNA	FBtr0290077	capu-RE		0	0	0	0	0	0	0	0	0	0	0.6	4.43	0	0	0	0	0	0	0	0	0	0	0	0	0	0	4.31	0	0	0	0	0	0	0	0	0.18	0	0	0
360	FBtr0290078	protein_coding_gene	FBgn0000256	capu	cappuccino	CG3399	mRNA	FBtr0290078	capu-RF		2.45	3.62	1.95	0	0	0	3.64	3.07	0.41	1.81	2.86	5.23	0	8.87	2.81	0.85	0	0.15	0	7.63	10.85	0	2.33	2.92	0.3	0	1.5	5.15	2.24	1.6	2.41	3.96	0.07	0	0.44	0.3	0	1.12	0
361	FBtr0290079	protein_coding_gene	FBgn0000256	capu	cappuccino	CG3399	mRNA	FBtr0290079	capu-RG		0.13	0.05	0.09	0	0	0	0	0	0	0	0	0	0.08	0	0.06	0	0	0.62	0	0	1.18	10.22	0	0.06	0	0.56	5.73	2.98	1.66	0	0.23	4.71	0	0	0.51	62.12	0	0	0
362	FBtr0290080	protein_coding_gene	FBgn0000256	capu	cappuccino	CG3399	mRNA	FBtr0290080	capu-RH		0	0	0	0	0	0	0	0	0	0	0	0	0.4	0	0	0	0	0	0	0	0	0	0	0	0	0	0	0	31.2	0	0	0	0	0	0	6.99	0	0	0
363	FBtr0290081	protein_coding_gene	FBgn0000256	capu	cappuccino	CG3399	mRNA	FBtr0290081	capu-RI		4.02	1.59	2.79	2.46	0	0	0.35	9.96	0.41	8.56	0.48	0	0	4.26	2.4	7.01	0.09	0.4	0	0	4.54	2.6	0.65	0	0	0	0	5.98	0	21.82	6.13	0.84	2.7	0	9.8	0	0	0	0
364	FBtr0290082	protein_coding_gene	FBgn0000256	capu	cappuccino	CG3399	mRNA	FBtr0290082	capu-RJ		0	0	0	0	0	0	0	0	0	0	0	0	0	0	0	0	0	0	0	0	0	0	0	0	0	0	0	0	0	0	0	0	0	0	0	0	0	0	0
365	FBtr0074727	protein_coding_gene	FBgn0000257	car	carnation	CG12230	mRNA	FBtr0074727	car-RB		0	0	0	0	0	0	0	0	0	0	0.03	0	0	0	0	0	0	0	0	0	0	0	0	0	0	0	0	0	0	0	0	0	0	0	0	0	0	0	0
366	FBtr0074728	protein_coding_gene	FBgn0000257	car	carnation	CG12230	mRNA	FBtr0074728	car-RA		2.74	4.07	5.29	0.13	0.4	0.47	1.91	1.24	0.26	2.71	1.23	1.89	0	0	0.97	3.24	0.31	0.19	0.08	1.74	0.35	0.61	0.41	5.17	0	0	0.1	1.28	14.79	0.72	10.69	0.13	5.9	0.18	1.18	0.07	4.9	6.38	15.57
367	FBtr0331158	protein_coding_gene	FBgn0000257	car	carnation	CG12230	mRNA	FBtr0331158	car-RC		0	0	0	0	0	0	0	0	0	0	0.03	0	0	0	0	0	0	0	0	0	0	0	0	0	0	0	0	0	0	0	0	0	0	0	0	0	0	0	0
368	FBtr0073558	protein_coding_gene	FBgn0000259	CkIIβ	Casein kinase II β subunit	CG15224	mRNA	FBtr0073558	CkIIβ-RB		6.46	8.01	19.13	43.41	4.41	2.83	0	6.28	1.44	22.14	7.91	4.92	14.1	0	3.52	2.8	0	1	4.21	0	59.91	44.32	3.13	48.11	41.42	0.51	14	4.3	1.65	3.47	5.65	9.9	13.59	0.73	5.39	99.17	0	0	0
369	FBtr0073560	protein_coding_gene	FBgn0000259	CkIIβ	Casein kinase II β subunit	CG15224	mRNA	FBtr0073560	CkIIβ-RC		0	0.01	0	0	0	0	0	0	0	0	25.51	0	40.66	0	0.43	0.86	20.4	0	0	0	7.27	0	16.73	61.97	0	0	0	0	0	5.19	0	0	13.45	0	21.08	0	1.97	2.02	2.39
370	FBtr0073561	protein_coding_gene	FBgn0000259	CkIIβ	Casein kinase II β subunit	CG15224	mRNA	FBtr0073561	CkIIβ-RD		0	3.94	0.7	0	0	10.09	0	0	0	0	0.73	0	0	0	0	0	0	0	0	0	0	3.08	0	0	20.52	82.49	0	0	0	7.1	0	0	0	0	1.19	0	0	0	8.07
371	FBtr0073562	protein_coding_gene	FBgn0000259	CkIIβ	Casein kinase II β subunit	CG15224	mRNA	FBtr0073562	CkIIβ-RE		97.71	123.96	171.02	95.08	7.38	49.05	130.76	124.6	60.92	92.02	60.19	243.35	192.65	223.73	48.84	170.16	87.28	62.86	130.21	304.4	191.42	215.19	233.22	293.61	233.5	172.6	84.45	77.37	123.47	24.26	55.96	103.28	208.49	43.39	149.93	305.41	12.45	21.81	31.35
372	FBtr0100540	protein_coding_gene	FBgn0000259	CkIIβ	Casein kinase II β subunit	CG15224	mRNA	FBtr0100540	CkIIβ-RF		5.41	4.88	0	0	0	0	0	0.6	0	0.45	0.64	0	0	0	0	0	0	0	0	7.42	1.57	0	1.91	0	0	0	0.84	0	0	0	0	0	0.97	0	0	0	0	0	0
373	FBtr0299569	protein_coding_gene	FBgn0000259	CkIIβ	Casein kinase II β subunit	CG15224	mRNA	FBtr0299569	CkIIβ-RG		4.97	7.09	0.95	0.43	0	0	0	3	2.01	0	1.36	0	0	0	1.02	5.21	0	0	0	0	0.57	2.23	2.87	3.91	0	0	0.41	3.05	0	0	1.35	0	13.46	1.16	2.38	0	0	0	0
374	FBtr0307896	protein_coding_gene	FBgn0000259	CkIIβ	Casein kinase II β subunit	CG15224	mRNA	FBtr0307896	CkIIβ-RH		21.59	32.63	12.31	42	89.05	6.66	25.89	24.92	13.79	16.96	9.1	63.45	671.92	134.21	71.61	20.98	57.47	38.56	61.28	46.06	28.95	44.03	70.61	7.6	117.18	59.74	75.64	23.7	47.41	28.17	28.78	44.13	18.5	110.52	93.36	1094.1	7.3	5.99	3.38
375	FBtr0308084	protein_coding_gene	FBgn0000259	CkIIβ	Casein kinase II β subunit	CG15224	mRNA	FBtr0308084	CkIIβ-RI		7.06	10.04	15.49	1.32	0	0	7.97	79.11	1.56	13.11	11.84	0	4.43	0.17	0	0.39	0	0.53	1.97	28.91	60.77	78.03	36.74	15.69	35.23	0	31.61	2.76	0.63	0	24.14	34.2	72.11	4.56	37.85	0	0.43	3.73	0
376	FBtr0308085	protein_coding_gene	FBgn0000259	CkIIβ	Casein kinase II β subunit	CG15224	mRNA	FBtr0308085	CkIIβ-RJ		0	0	0	0	0	83.36	0	0	61.87	2.15	0	0	0	0	0	0	0	0	0	0	0	0	0	0	0	0	8.25	107.16	31.71	0	0	0	0	0	1.76	0	0	0	0
377	FBtr0333204	protein_coding_gene	FBgn0000259	CkIIβ	Casein kinase II β subunit	CG15224	mRNA	FBtr0333204	CkIIβ-RK		0	0	0	0	0	0	0	0	0	4.27	1.85	0	0	0	0	0	0	0	0	0.81	2.73	0	0	0	156.38	0	10.91	0	0	0	0	0	9.93	0	5.08	0	0.33	0	0.58
378	FBtr0075058	protein_coding_gene	FBgn0000261	Cat	Catalase	CG6871	mRNA	FBtr0075058	Cat-RA		20.47	14.14	33.38	0.9	0	5.56	0.23	7.71	14.64	3.9	15.25	2.27	0	0	5.14	14.78	0.35	2.18	0	29.45	2.59	7.03	8.51	3.69	0	26.92	16.3	4.3	2.21	22.34	14.69	0.96	2.78	0	11.1	0	5.36	19.48	15.53
379	FBtr0079851	protein_coding_gene	FBgn0000273	Pka-C1	Protein kinase, cAMP-dependent, catalytic subunit 1	CG4379	mRNA	FBtr0079851	Pka-C1-RB		1608.38	1965.9	1644.14	1055.41	821.32	1139.15	1307.47	1307.43	629.59	897.02	165.28	591.29	188.83	487.53	193.64	97.89	292.59	220.18	397.35	202.93	384.35	449.3	290.85	440.44	799.02	393.27	122.86	137.31	133.58	109.78	104.66	228.04	347.93	494.44	441.9	810.68	46.4	38.24	48.48
380	FBtr0079852	protein_coding_gene	FBgn0000273	Pka-C1	Protein kinase, cAMP-dependent, catalytic subunit 1	CG4379	mRNA	FBtr0079852	Pka-C1-RC		199.7	154.49	228.25	138.58	161.43	36.49	106.85	233.95	127.97	249.54	9.59	71.8	105.72	17.31	28.54	16.04	13.22	7.23	5.1	166.83	22.71	14.84	126.3	74.63	119.39	35.69	5.71	3.01	2.5	24.33	107.36	19.28	18.52	8.1	34.31	227.82	1.17	2	2.95
381	FBtr0335495	protein_coding_gene	FBgn0000273	Pka-C1	Protein kinase, cAMP-dependent, catalytic subunit 1	CG4379	mRNA	FBtr0335495	Pka-C1-RD		113.3	109.98	216.32	299.64	32.14	390.32	145.03	224.89	102.21	182.41	28.17	10.73	223.3	0.31	59.27	5.89	2.3	49.66	14.26	47.45	119.42	110.97	43.8	232.88	140.02	45.33	93.13	73.03	123.86	64.85	66.94	65.82	55.01	15.08	78.34	5.74	2.88	3.9	10.27
382	FBtr0085727	protein_coding_gene	FBgn0000274	Pka-C2	Protein kinase, cAMP-dependent, catalytic subunit 2	CG12066	mRNA	FBtr0085727	Pka-C2-RB		0	0	0	0	0	0	0	0	0	0	0	0	0	0	0	0	0	0	0	0	0	0	0	0	0	0	0	0	0	0	0	0	0	0	0	0	0	0	0
383	FBtr0335454	protein_coding_gene	FBgn0000274	Pka-C2	Protein kinase, cAMP-dependent, catalytic subunit 2	CG12066	mRNA	FBtr0335454	Pka-C2-RC		0	0	0	0	0	0	0	0	0	0	0	0	0	0	0	0.1	0	0	0	0	0	0	0	0	0	0	0	0	0	0	0	0	0	0	0	0	0	0	0
384	FBtr0085612	protein_coding_gene	FBgn0000276	CecA1	Cecropin A1	CG1365	mRNA	FBtr0085612	CecA1-RA		0	0	0	0	0	0	0	0	0	0	0	0	0	0	0	0	0	0	0	35.03	0	0	0	0	0	0	0	0	0	0	0	0	0	0	0	0	0	0	0
385	FBtr0085614	protein_coding_gene	FBgn0000277	CecA2	Cecropin A2	CG1367	mRNA	FBtr0085614	CecA2-RA		0	0	0	0	0	0	0	0	0	0	0	0	0	0	0	0	0	0	0	82.64	0	0	0	0	0	0	0	0	0	0	0	0	0	0	0	0	0	0	0
386	FBtr0085640	protein_coding_gene	FBgn0000278	CecB	Cecropin B	CG1878	mRNA	FBtr0085640	CecB-RA		0	0	0	0	0	0	0	0	0	0	0	0	0	0	0	0	0	0	0	0	0	0	0	0	0	0	0	0	0	0	0	0	0	0	0	0	0	0	0
387	FBtr0085616	protein_coding_gene	FBgn0000279	CecC	Cecropin C	CG1373	mRNA	FBtr0085616	CecC-RA		0	0	0	0	0	0	0	0	0	0	0	0	0	0	0	0	0	0	0	0	0	0	0	0	0	0	0	0	0	0	0	0	0	0	0	0	0	0	0
388	FBtr0085613	pseudogene_attribute	FBgn0000280	Cec-Ψ1	Cecropin pseudogene 1	CR32926	pseudogene	FBtr0085613	Cec-Ψ1-RA		0	0	0	0	0	0	0	0	0	0	0	0	0	0	0	0	0	0	0	0	0	0	0	0	0	0	0	0	0	0	0	0	0	0	0	0	0	0	0
389	FBtr0089614	pseudogene_attribute	FBgn0000281	Cec2	Cecropin 2	CR32934	pseudogene	FBtr0089614	Cec2-RA		0	0	0	0	0	0	0	0	0	0	0	0	0	0	0	0	0	0	0	0	0	0	0	0	0	0	0	0	0	0	0	0	0	0	0	0	0	0	0
390	FBtr0083126	protein_coding_gene	FBgn0000283	Cp190	Centrosomal protein 190kD	CG6384	mRNA	FBtr0083126	Cp190-RA		82.17	84.89	62.07	57.21	18.65	44.64	19.02	106.73	53.09	58.98	8.26	9.69	46.92	4.01	66.19	42.67	4.91	10.56	14.74	21.82	39.32	44.52	37.93	66.49	58.13	21.02	27.82	6.42	10.85	13.06	38.62	6.86	18.15	56.53	17.93	45.03	1.39	2.88	0.15
391	FBtr0083127	protein_coding_gene	FBgn0000283	Cp190	Centrosomal protein 190kD	CG6384	mRNA	FBtr0083127	Cp190-RB		2.37	6.07	16.17	0	0	0	0	1.72	0	6.19	13.06	0	5.83	3.33	3.96	3.71	0	0	0	0	4.93	0	4.81	16.87	0	0	5.41	51.18	0	0	0	21.2	15.39	0	26.01	0	0	0.38	0
392	FBtr0089647	protein_coding_gene	FBgn0000286	Cf2	Chorion factor 2	CG11924	mRNA	FBtr0089647	Cf2-RC		13.32	20.05	30.7	2.76	0	28.15	2.78	21.74	6.2	11.63	3.38	0	3.11	0	1.52	0.33	0	2.83	11.84	0	3.02	10.09	5.77	24.69	2.22	2.24	1.43	3.51	0	8.21	1.92	8.33	1.47	0	2.81	45.85	0.53	0	1.96
393	FBtr0089648	protein_coding_gene	FBgn0000286	Cf2	Chorion factor 2	CG11924	mRNA	FBtr0089648	Cf2-RB		12.35	0	0	14.96	0	0	0	0	0	0	0	0	0	0	0	0	0	15.3	0	2.49	0	0	0	0	0	0	0	21.08	0	0	0	3.8	0	0	0	0.5	0	0	0
394	FBtr0089649	protein_coding_gene	FBgn0000286	Cf2	Chorion factor 2	CG11924	mRNA	FBtr0089649	Cf2-RA		23.8	16.44	25.3	2.37	0	10.04	35.38	38.18	15.3	21.03	15.78	2.03	154.71	3.14	81.86	18.33	2.77	0	22.22	0	22.15	30.05	13.96	80.75	82.67	3.04	34.27	4.35	6.14	28.11	18.91	4.13	14.87	0	32.4	5.2	0.26	2.15	0
395	FBtr0304887	protein_coding_gene	FBgn0000286	Cf2	Chorion factor 2	CG11924	mRNA	FBtr0304887	Cf2-RE		12.34	18.98	13.62	15.17	3.32	0.14	2.21	14.62	2.56	28.61	5.19	1.93	50.99	0	12.03	2.61	9.28	6.82	8.63	0.2	21.27	27.7	17.48	58.22	25.81	0	41.84	0.81	34.81	0.74	3.73	11.79	9.67	0	4.78	10.21	0.28	0	0
396	FBtr0336835	protein_coding_gene	FBgn0000286	Cf2	Chorion factor 2	CG11924	mRNA	FBtr0336835	Cf2-RF		9.08	1.95	8.6	45.2	58.09	0	15.37	11.02	23.8	8.02	0	94.59	186.27	42.82	0	0	14.75	0	10.09	197.39	59.42	22.6	11.77	24.75	0.07	30.26	0	0	0	0	6.14	15.21	0	46.11	3.46	0	0	0	0
397	FBtr0472669	protein_coding_gene	FBgn0000286	Cf2	Chorion factor 2	CG11924	mRNA	FBtr0472669	Cf2-RG		13.32	20.05	30.7	2.76	0	28.15	2.78	21.74	6.2	11.63	3.38	0	3.11	0	1.52	0.33	0	2.83	11.84	0	3.02	10.09	5.77	24.69	2.22	2.24	1.43	3.51	0	8.21	1.92	8.33	1.47	0	2.81	45.85	0.53	0	1.96
398	FBtr0080235	protein_coding_gene	FBgn0000287	salr	spalt-related	CG4881	mRNA	FBtr0080235	salr-RA		0	0	0	0	0	0	0	0	0	0	0	0.03	0	0	0	0	0	0.09	0	0	0	0	0.01	0	0	0	0	0.03	0	0	0	0	0	0	0	1.09	0	0	0
399	FBtr0080236	protein_coding_gene	FBgn0000287	salr	spalt-related	CG4881	mRNA	FBtr0080236	salr-RB		0	0	0	0	0	0	0	0	0	0	0	0	0	0	0	0	0	0	0	0	0	0	0	0	0	0	0	0	0	0	0	0	0	0	0	0	0	0	0
400	FBtr0307093	protein_coding_gene	FBgn0000287	salr	spalt-related	CG4881	mRNA	FBtr0307093	salr-RC		0	0	0	0	0	0	0	0	0	0.05	1.13	0	0	0	0	0	0	0.08	0	0	0	0	0.05	0.03	0	0	0	0	0	0	0	0.04	0	0	0.19	0	0	0	0
401	FBtr0087526	protein_coding_gene	FBgn0000289	cg	combgap	CG8367	mRNA	FBtr0087526	cg-RD		0	0	0	0	0	0	0	0	23.63	0	0	0	0	0	0	0	0	0	0	0	0	0	0	0	0	0	0	0	0	0	0	0	0	0	0	0	0	0	0
402	FBtr0087527	protein_coding_gene	FBgn0000289	cg	combgap	CG8367	mRNA	FBtr0087527	cg-RB		0	0	0	0	0	0	0	0	0	0	0	0	0	0	0	0	0	0	0	0	0	0	0	0	0	0	0	0	0	0	0	0	0	0	0	0	0	0	0
403	FBtr0087528	protein_coding_gene	FBgn0000289	cg	combgap	CG8367	mRNA	FBtr0087528	cg-RC		18.77	27.66	8.74	23.92	0	18.29	17.72	55.63	32.92	19.63	2.6	0	0	152.64	16.81	139.72	1.29	2.12	0	0.44	9.2	1.26	2.03	3.59	0	1	6.23	3.62	0	10.41	0	0.76	19.87	0	7.69	21.55	0.1	10.59	0
404	FBtr0087529	protein_coding_gene	FBgn0000289	cg	combgap	CG8367	mRNA	FBtr0087529	cg-RA		0	0	0	0	0	0	0	0	0	0	0	1.54	0	0	0	0	0	0	0	0	0	0.27	0	0	0	0	0	0	0	0	0	0	0	0	0	0	0	0	0
405	FBtr0112795	protein_coding_gene	FBgn0000289	cg	combgap	CG8367	mRNA	FBtr0112795	cg-RF		54.15	61.33	34.1	101.81	19.3	22.72	0	51.34	22.72	58.19	10.2	0	136.79	0	80.72	51.32	0	16.73	0	0	67.81	28.17	4.93	137.94	2.52	0	23.05	53.5	2.79	0	38.3	24.26	40.97	0	40.3	0	0	0	0
406	FBtr0290034	protein_coding_gene	FBgn0000289	cg	combgap	CG8367	mRNA	FBtr0290034	cg-RI		0	0	0	4.14	0	0	0	0	0	0	0	0	0	0	0	0	0	0	0	0	0	0	0	0	0	0	0	0	0	0	6.06	0	0	0	0	0	0	0	0
407	FBtr0290035	protein_coding_gene	FBgn0000289	cg	combgap	CG8367	mRNA	FBtr0290035	cg-RJ		13.36	20.45	0.85	0	0	0	0	46.4	32.9	5.96	1.01	0	2.13	0.51	11.89	0	0	0	0	0	0	0	4.85	0	0	169.1	10.42	0	1.53	29.96	0	3.83	0	0	0	0	0	0	0
408	FBtr0339960	protein_coding_gene	FBgn0000289	cg	combgap	CG8367	mRNA	FBtr0339960	cg-RK		22.14	29.05	64.48	7.3	333.98	0.52	3.3	98.95	53.62	25.34	5.49	0	26.49	0	44.4	110.95	0	32.76	11.99	0	28.95	106.96	2.41	20.91	0	0.29	16.78	23.53	6.73	56.39	27.91	26.82	12.49	3.69	24.81	26.27	0	4.75	0
409	FBtr0339961	protein_coding_gene	FBgn0000289	cg	combgap	CG8367	mRNA	FBtr0339961	cg-RL		0	7.16	3.91	0	0	0	0	13.27	0	7.06	1.13	0	0.2	0	0	7.07	0	0	0	0	0	3.08	0	0	0.54	0	2.35	0.83	0	0	0	0	4.17	0	0.46	0	0	0	0
410	FBtr0339962	protein_coding_gene	FBgn0000289	cg	combgap	CG8367	mRNA	FBtr0339962	cg-RM		0	0	0	0	0	0	0	0	0	0	0.44	0	35.2	0	0	0	0	0	0	0	0	0	0	0	0	0	0	0	0	0	0	0	0	0	0	0	0	0	0
411	FBtr0346946	protein_coding_gene	FBgn0000289	cg	combgap	CG8367	mRNA	FBtr0346946	cg-RN		91.83	58.74	134.32	0	29.48	54.2	173.91	111.17	70.36	62.13	22.96	17.61	12.09	34.53	10.29	24.03	21.8	11.02	8.99	18.62	28.34	31.29	47.61	15.25	105.61	12.69	36.44	87.61	96.95	97.24	15.12	50.25	6.19	152.33	34.77	9.12	4.53	3.7	7.99
412	FBtr0079001	protein_coding_gene	FBgn0000299	Col4a1	Collagen type IV alpha 1	CG4145	mRNA	FBtr0079001	Col4a1-RC		0	1.54	0	0	0	0	0	0.52	0	0.81	0.28	0	0	0	0.48	0	47.53	0.28	0.22	60.92	0	0	0	0	0	4.01	0	0	0	0.25	0.32	0.07	0	0.07	0	0.04	0	0	0
413	FBtr0079002	protein_coding_gene	FBgn0000299	Col4a1	Collagen type IV alpha 1	CG4145	mRNA	FBtr0079002	Col4a1-RB		0	0	0	0	0	0	0	0	0	0	120.28	0	0	0.21	0	0	1.28	0	0	38.68	0.94	0.24	23.14	0.07	0.08	0	0.28	0	0	0	0	26.27	20.67	0	2.66	0	0	0	0
414	FBtr0079003	protein_coding_gene	FBgn0000299	Col4a1	Collagen type IV alpha 1	CG4145	mRNA	FBtr0079003	Col4a1-RA		0.25	0	0	0	0	0	0	0	0	0	2.31	0.07	0	0	0	0	0.08	0	0	0	0	0	0	0	0	0	0	0	0	0	0	4	0	0	0.08	0	0	0	0
415	FBtr0089367	protein_coding_gene	FBgn0000303	ChAT	Choline acetyltransferase	CG12345	mRNA	FBtr0089367	ChAT-RA		23.43	25.88	46.68	62.14	58.67	79.66	21.96	18.01	10.44	17.18	21.33	2.71	1.92	28.89	2.21	0.29	2.01	2.48	0.84	3.65	0.93	3.53	35.21	2.98	1.49	3.2	0.21	0.48	0	0	0.03	5.12	6.95	2.75	4.84	1.44	6.23	3.34	5.45
416	FBtr0089368	protein_coding_gene	FBgn0000303	ChAT	Choline acetyltransferase	CG12345	mRNA	FBtr0089368	ChAT-RB		7.45	8.03	0	0	0	13.79	114.54	33.62	0	5.83	0	0	0	0	1.82	0.28	0	0	0	0	0	0	0	0	0	42.98	0.29	0	0.06	0	0	0	0	0	0	0	0	5.5	0
417	FBtr0080838	protein_coding_gene	FBgn0000307	chif	chiffon	CG5813	mRNA	FBtr0080838	chif-RA		3.46	3.04	4.38	4.25	6	0	0	4.4	10.31	0.78	9.62	0	0.04	5.22	1.57	0.87	0	8.96	0	0.4	1.89	1.67	4.58	0.15	0	27.77	4.92	8.24	0.21	11.02	9.25	8.11	10.44	0	25.74	0	0.05	0	0
418	FBtr0080839	protein_coding_gene	FBgn0000307	chif	chiffon	CG5813	mRNA	FBtr0080839	chif-RB		27.15	33.53	27.74	13.49	30.93	0.44	5.89	28.53	7.4	17.69	3.35	44.8	19.08	8.29	20.07	34.1	1.73	0	11.52	11.7	27.17	7.32	12.65	26.92	12.36	0	12.01	0.54	0	2.66	7.56	8.29	8.18	5.02	18.25	77.58	0	0	0.43
419	FBtr0321313	protein_coding_gene	FBgn0000307	chif	chiffon	CG5813	mRNA	FBtr0321313	chif-RD		10.45	8.65	7.31	0	7.4	67.47	41.52	4.58	0	4.19	3.24	0.58	0	0	0.32	0	0.25	6.63	1.25	0	5.63	0	0.11	2.03	8.94	37.3	0	35.2	41.77	49.75	7.13	0	2.5	48.54	0	0	0	0	0
420	FBtr0475053	protein_coding_gene	FBgn0000307	chif	chiffon	CG5813	mRNA	FBtr0475053	chif-RE		27.15	33.53	27.74	13.49	30.93	0.44	5.89	28.53	7.4	17.69	3.35	44.8	19.08	8.29	20.07	34.1	1.73	0	11.52	11.7	27.17	7.32	12.65	26.92	12.36	0	12.01	0.54	0	2.66	7.56	8.29	8.18	5.02	18.25	77.58	0	0	0.43
421	FBtr0079233	protein_coding_gene	FBgn0000308	chic	chickadee	CG9553	mRNA	FBtr0079233	chic-RA		189.73	99.13	93.95	0	44.51	0	0	89.35	0	144.91	33.5	385.53	0	0	220.5	100.05	2.31	246.22	84.28	2.15	21.29	44.29	7.08	12.21	48.42	40.9	38.12	5.91	109.95	0	45.57	27.9	7.6	0	7.57	2330.11	97.69	65.55	88.68
422	FBtr0079234	protein_coding_gene	FBgn0000308	chic	chickadee	CG9553	mRNA	FBtr0079234	chic-RC		5.14	22.51	0	0	0	0	45.85	21.04	0	1.06	176.38	0	45.47	1.37	0.25	0	0	0	0	0	502.8	444.5	210.94	132.21	421.76	0	1179.68	2.36	0	28.24	0	146.47	352.99	0	168.72	0	0	0	0
423	FBtr0079235	protein_coding_gene	FBgn0000308	chic	chickadee	CG9553	mRNA	FBtr0079235	chic-RB		15.17	19.18	18.94	0	0	0	0	9.93	5.1	15.74	16.89	58.87	0	0	5.61	1.5	0	10.94	18.62	1.14	83.23	77.91	32.71	57.67	10.65	2.05	68.36	0.79	15.22	0	1.5	8.98	45.68	2.56	31.53	0	38.76	48.76	1.29
424	FBtr0079236	protein_coding_gene	FBgn0000308	chic	chickadee	CG9553	mRNA	FBtr0079236	chic-RD		153.84	246.47	338.18	76.98	0.11	55.15	39.45	107.62	76.24	87.45	67.7	240.51	571.07	176.75	159.25	146.94	263.59	172.47	652.37	959.97	694.17	386.75	280.08	254.14	84.05	9.58	157.66	98.42	66.29	161.68	36.83	85.61	165.27	279.04	141.78	502.05	5.58	0.28	8.26
425	FBtr0309212	protein_coding_gene	FBgn0000308	chic	chickadee	CG9553	mRNA	FBtr0309212	chic-RE		12.13	20.87	3.17	0	0	0	0	7.16	19.83	17.15	11.2	0	0	0	0	0	0	9.04	0	0	74.78	0	0	4.41	0	0	15.94	0	95.04	0	0	0	0	0	2.67	0	3.69	0	2.29
426	FBtr0309213	protein_coding_gene	FBgn0000308	chic	chickadee	CG9553	mRNA	FBtr0309213	chic-RF		0	0	7.16	0	4.77	0	0	0.67	0	0	0	0	0	0	0	0	0	0	0	0	0	0	0	0	0	25.67	0	0	0	0	0	0	0	0	0	0	0	0	0
427	FBtr0070064	protein_coding_gene	FBgn0000316	cin	cinnamon	CG2945	mRNA	FBtr0070064	cin-RB		7.62	0	13.95	0	0	13	0	0	11.84	0	0	0	0.64	0	7.24	8.76	4.54	0	0	22.5	12.31	0	0	0	0	0	3.56	10.93	0	0.02	6.72	0	0	36.15	0	0	4.15	4.03	9.22
428	FBtr0070065	protein_coding_gene	FBgn0000316	cin	cinnamon	CG2945	mRNA	FBtr0070065	cin-RA		30.27	39.49	15.56	43.98	0.25	0	41.52	34.7	23.4	36.71	9.16	31.54	2.71	233.93	12.2	3.86	0	14.33	15.46	2.75	5.7	22.1	32.32	24.2	0.67	31.36	3.73	16.7	3.05	18	13.73	13.61	20.25	15.94	11.51	193.74	0	0	0
429	FBtr0080723	protein_coding_gene	FBgn0000317	ck	crinkled	CG7595	mRNA	FBtr0080723	ck-RA		0	0	0	0	0	0	0	0	0	0	2.23	0	0	0	0	0	0	0	0	0	0	0	0.06	0	0	0	0.02	0	0	0	0	0	0	0	0	0	0	0	0
430	FBtr0080724	protein_coding_gene	FBgn0000317	ck	crinkled	CG7595	mRNA	FBtr0080724	ck-RB		0	0	0	0	0	0	0	0	0	0	0	0.02	0	0	0	0	0	0	0	0	0	0.14	6.31	0	0	0	0.88	0	0	0	0	0	0.49	0	0	0	0	0	0
431	FBtr0343686	protein_coding_gene	FBgn0000317	ck	crinkled	CG7595	mRNA	FBtr0343686	ck-RC		0	0.76	2.38	0.71	0	0	0	0.18	0	0.13	0	0	0	0	0.02	0.03	0.02	0.05	0	0	0.25	0	0	0	0	0	0	0	0	0	1.68	1.13	0.18	0	2.99	0	0	0	0.04
432	FBtr0343687	protein_coding_gene	FBgn0000317	ck	crinkled	CG7595	mRNA	FBtr0343687	ck-RD		0.03	0	0	0	0	0	0	0	0.03	0	0.57	0	0	0	0	0	0	0	0	0	0	0	0	0.25	0	0	0	0	0	0	0	0	0	0	0	0	0	0	0
433	FBtr0079095	protein_coding_gene	FBgn0000318	cl	clot	CG11024	mRNA	FBtr0079095	cl-RA		75.52	102.34	55.43	0.8	4388.84	0.35	45.76	131.22	71.68	41.34	84.31	0.45	0	44.76	37.25	147.4	0.27	2.44	11.32	0.27	0	0	7	60.08	0	0.41	290.56	76.59	91.35	91.24	93.65	27.67	0	0	29.1	0	134.13	163.27	173.69
434	FBtr0329967	protein_coding_gene	FBgn0000318	cl	clot	CG11024	mRNA	FBtr0329967	cl-RB		0	0	0	0	0	0	0	0	0	0	62.9	0	0	0	0	0	0	0	0	0	75.29	39.23	10.44	40.1	1.24	0	332.9	0	0	0	0	39.11	36.55	0	49.97	0	0	0	0
435	FBtr0329968	protein_coding_gene	FBgn0000318	cl	clot	CG11024	mRNA	FBtr0329968	cl-RC		1.06	0	0	0	0	0	0	0	0	0	0	0	0	0	0	0	0	0	0	0	0	0	0	0	0	0	0	0	0	0	0	0	0	0	0	0	0	0	0
436	FBtr0074179	protein_coding_gene	FBgn0000319	Chc	Clathrin heavy chain	CG9012	mRNA	FBtr0074179	Chc-RA		7.5	8.48	10	12.87	3.55	1.36	34.7	9.38	3.64	5.65	12.28	10.16	1.28	24.07	5.23	14.76	17.53	18.76	6.28	2.49	21.39	2.04	4.26	13.27	1.02	3.18	30.32	18.5	21.49	3.39	33.48	6.28	41.72	30.2	0	16.12	0	0	11.77
437	FBtr0074180	protein_coding_gene	FBgn0000319	Chc	Clathrin heavy chain	CG9012	mRNA	FBtr0074180	Chc-RB		2.52	0	0	2.43	0	0	0	0	0	0	0	0	1.95	0	0	0	0	0.68	0.91	0.37	0	0	3.09	3.03	0	0	0.96	0	0	2.78	0	1.22	0	0	1.58	0	0	23.73	7.17
438	FBtr0074181	protein_coding_gene	FBgn0000319	Chc	Clathrin heavy chain	CG9012	mRNA	FBtr0074181	Chc-RC		7.07	0	4.44	0	87.2	0	16.91	14.88	1.48	0.95	1.32	0	0	0	0	1.24	0	0.67	0	0.33	0	0	1.14	23.4	0	0	1.48	0	0	0.8	0.73	0	0.75	0	0	1.73	0	0	0
439	FBtr0074182	protein_coding_gene	FBgn0000319	Chc	Clathrin heavy chain	CG9012	mRNA	FBtr0074182	Chc-RD		1.36	6	4.63	2.72	1	0	1.33	4.58	0	5.08	15.16	4.8	0	1.08	5.19	0	0	0	0	2.8	14.07	6.68	5.32	14.17	1.63	0	15.2	1.81	0.56	0	0	3.63	10.59	0	32.37	0	0	0	9.28
440	FBtr0112797	protein_coding_gene	FBgn0000319	Chc	Clathrin heavy chain	CG9012	mRNA	FBtr0112797	Chc-RE		0	0	0	0	0	0	0	0	0	0	0	0	0	0	0	0	0	0	0	0	0	0	0.93	0	0	0	0	0	0	0	0	0	0	0	0	0	2.54	0	0
441	FBtr0112798	protein_coding_gene	FBgn0000319	Chc	Clathrin heavy chain	CG9012	mRNA	FBtr0112798	Chc-RF		38.25	65.87	43.77	46.19	0	64.43	0	17.46	11.69	35.07	8.63	0	7.58	7.44	29.35	37.86	0	0	0	0	0	0	0	0	17.45	69.62	0	33.21	55.7	21.1	12.2	20.84	0	35.44	0	11.31	21.94	2.21	0
442	FBtr0339445	protein_coding_gene	FBgn0000319	Chc	Clathrin heavy chain	CG9012	mRNA	FBtr0339445	Chc-RG		0	0	0	0	0	0	3.19	0.7	0	0.59	3.05	0.81	0	0	0	0	0	0	0	0	0	0	0	0	0	0	0	0	0	0	0	0	0	0	0	0	0	0	0
443	FBtr0079334	protein_coding_gene	FBgn0000320	eya	eyes absent	CG9554	mRNA	FBtr0079334	eya-RB		0.12	1.66	0	0	0	0	0	0	2.97	0	0.39	0	0	0	0	0	0	0	0	0	0	0	0	0	0	0	0	0	0	0	0	0	0	0	0	0	0	0	0
444	FBtr0079335	protein_coding_gene	FBgn0000320	eya	eyes absent	CG9554	mRNA	FBtr0079335	eya-RA		0	0	0	0	0	0	0	0	0	0	0	0	0	0	0	0	0	0	0	0	0	0	0	0	0	0	0	0	0	0	0	0	0	0	0	0	0	0	0
445	FBtr0306113	protein_coding_gene	FBgn0000320	eya	eyes absent	CG9554	mRNA	FBtr0306113	eya-RC		0	4.31	0.46	0	32.65	0	0	0	0	0.04	0	0	0	0	0.7	0	0	0	0	0.38	0	0	9.78	0	0.05	0.21	0	0	0	0	0	0	0.33	0	0.04	0	0	0	0
446	FBtr0071687	protein_coding_gene	FBgn0000326	clt	cricklet	CG9858	mRNA	FBtr0071687	clt-RA		3.09	0.54	0	0	0	0	0	0.32	0	4.99	1.32	0	0	0	0	0.34	0	0	0	0	1.23	11.28	0.86	0	0	0	0	0.7	0.34	3.23	0	0	0.06	0	0	0	0	9.13	3.71
447	FBtr0071033	protein_coding_gene	FBgn0000330	cm	carmine	CG3035	mRNA	FBtr0071033	cm-RA		11.38	0	20.54	18.16	0	0	6.22	17.64	20.13	13.59	0	0	0	0.47	28.94	100.06	0.88	11.81	2.83	73.57	0	0	0	0	0	0	0	2.42	6.52	11.57	11.56	6.47	19.45	0	0	12.22	6.76	15.45	11.77
448	FBtr0332315	protein_coding_gene	FBgn0000330	cm	carmine	CG3035	mRNA	FBtr0332315	cm-RB		8.79	38.96	25.03	1.83	0	148.35	12.63	15.11	1.25	0.37	5.72	0	1.04	0	17.54	0	0	0.53	0	0	18.09	4.62	2.92	0	0	0	7.55	0	0	20.85	0	1.57	1.89	0	9.03	0	0	0	0
449	FBtr0344723	protein_coding_gene	FBgn0000337	cn	cinnabar	CG1555	mRNA	FBtr0344723	cn-RB		0	0	0	0	0	0	0	0	0	0	0	0	0	0	0	0	0	0	0	0	1.66	0	0	0	0	0	0	0	0	0	0	0	0	0	0	0	0	0	0
450	FBtr0080848	protein_coding_gene	FBgn0000339	cni	cornichon	CG5855	mRNA	FBtr0080848	cni-RA		3.96	8.52	26.95	0.14	0	0	0	3.45	0	3.73	1.67	8.37	0	0	0	12.29	26.85	5.18	60.31	0	137.65	200.1	0	3.66	0	0	46.16	0	0	16.57	0	6.95	55.9	0	4.84	0	29.67	16.23	7.54
451	FBtr0080849	protein_coding_gene	FBgn0000339	cni	cornichon	CG5855	mRNA	FBtr0080849	cni-RB		7.35	11.08	15.63	0	0	0	0	13.86	0	59.4	9.5	1.95	0	0	8.33	0	13.82	0	5.87	0	20.54	6.29	16.97	5.99	0	0	108.29	55.13	3.5	0	13.66	21.8	10	8.63	36.2	0	13.45	1.41	12.88
452	FBtr0337082	protein_coding_gene	FBgn0000339	cni	cornichon	CG5855	mRNA	FBtr0337082	cni-RC		1.95	8.87	0.66	0	0	0	0	1.73	0	5.13	6.56	0	100.18	0	14.76	13.51	0	0	0	0	4.53	4.84	11.06	2.13	0	0	5.86	11.62	0	2.52	2.81	23.47	1.65	0	16.59	0	6.3	3.91	0
453	FBtr0073754	protein_coding_gene	FBgn0000346	comt	comatose	CG1618	mRNA	FBtr0073754	comt-RA		56.41	86.56	56.73	62.15	28.26	36.48	58.78	56.52	26.41	54.82	46.39	32.2	10.64	51.4	45.76	33.1	77.63	12.95	20.99	37.75	33.5	26.17	40.52	84.37	22.4	10.07	11.8	39.46	18.92	21.5	22.81	28.54	54.1	61.44	16.15	11.96	97.24	80.36	45.29
454	FBtr0333329	protein_coding_gene	FBgn0000346	comt	comatose	CG1618	mRNA	FBtr0333329	comt-RB		0	0.5	0	0	0	0	0	0	0	0.38	0	0	0	0	0	1.75	0	0	0	0	0.24	0	0	0	0	0	0.66	0.23	0	0	0	0	0	0	1.32	0	0	0	3.44
455	FBtr0079320	protein_coding_gene	FBgn0000351	cort	cortex	CG11330	mRNA	FBtr0079320	cort-RA		0.13	0.2	0.37	0	0	0	0	0	0	0	0	4.46	0	0	0	0	0	0	0	0	0	0	0	0	0	0	0	0	0	0	0	0	1.25	0	0	0	0	0	0
456	FBtr0333350	protein_coding_gene	FBgn0000351	cort	cortex	CG11330	mRNA	FBtr0333350	cort-RB		0	0	0	0	0	0	0	0.09	0	0	0	0	0	0	0	0	0	0	0	0	0.22	9.33	0	0.12	0	0	0	1.31	0	0	0	0	0	0	0	0	0	0	0.28
457	FBtr0089015	protein_coding_gene	FBgn0000352	cos	costa	CG1708	mRNA	FBtr0089015	cos-RA		8.25	16.63	2.89	18.62	30.23	0	17.08	6.99	2.74	3.6	8.4	5.13	5.77	0	0.36	0	4.11	6.08	0.35	12.24	46.45	33.48	18.4	8.21	9.37	2.18	6.74	0	0	3.05	7.3	0.24	16.94	22.66	18.8	4.43	0	0	0
458	FBtr0336916	protein_coding_gene	FBgn0000352	cos	costa	CG1708	mRNA	FBtr0336916	cos-RB		35.55	42.61	32.4	20.6	9.74	5.7	14.35	35.71	15	21.19	0	13.81	0	14.41	18.53	31.9	26.76	0	34.47	7.11	0	0	0	0	0	7.07	0	31.23	43.19	14.29	15.17	3.6	0	0	2.54	32.2	0.06	0	0
459	FBtr0076572	protein_coding_gene	FBgn0000355	Cp15	Chorion protein 15	CG6519	mRNA	FBtr0076572	Cp15-RA		0	0.85	0	0	0	0	0	0	0	0	0	0	0	0	0	0	0	0	0	0	0	0	0	0	0	0	0	0	0	0	0	0	0	0	0	0	0	0	0
460	FBtr0076574	protein_coding_gene	FBgn0000356	Cp16	Chorion protein 16	CG6533	mRNA	FBtr0076574	Cp16-RA		0	0	0	0	0	0	0	0	0	0	0	0	0	0	0	0	0	0	0	0	0	0	0	0	0	0	0	0	0	0	0	0	0	0	0	0	0	0	0
461	FBtr0076571	protein_coding_gene	FBgn0000357	Cp18	Chorion protein 18	CG6517	mRNA	FBtr0076571	Cp18-RA		0.39	0	0	0	0	0	0	0	2.49	2.31	3.78	0	0	0	0	0	0	0	0	0	0	0	0	0	0	0	0	0	0	0	0	0	44.47	3.59	0	0	0	0	3.49
462	FBtr0076573	protein_coding_gene	FBgn0000358	Cp19	Chorion protein 19	CG6524	mRNA	FBtr0076573	Cp19-RA		0	0	0	0	0	0	0	0	0	0	0	0	0	0	0	0	0	0	0	0	0	0	0	0	0	0	0	0	0	0	0	0	0	0	0	0	0	0	0
463	FBtr0071203	protein_coding_gene	FBgn0000359	Cp36	Chorion protein 36	CG1478	mRNA	FBtr0071203	Cp36-RA		0	0	0	0	0	0	0	0	0	0	0	0	0	0	0	0	0	0	0	0	0	0	0	0	0	0	0	0	0	0	0	0	0	0	0	0	0	0	0
464	FBtr0071204	protein_coding_gene	FBgn0000360	Cp38	Chorion protein 38	CG11213	mRNA	FBtr0071204	Cp38-RA		0	0	0	0	0	0	0	0	0	0	0	0	0	0	0	0	0	0	0	0	0	0	0	0	0	0	0	0	0	0	0	0	0	0	0	0	0	0	0
465	FBtr0300448	protein_coding_gene	FBgn0000360	Cp38	Chorion protein 38	CG11213	mRNA	FBtr0300448	Cp38-RB		0	0	0	0	0	0	0	0	0	0	0	0	0	0	0	0	0	0	0	0	0	0	0	0	0	0	0	0	0	0	0	27.95	0	0	0	0	0	0	0
466	FBtr0081512	protein_coding_gene	FBgn0000370	crc	cryptocephal	CG8669	mRNA	FBtr0081512	crc-RA		28.79	31.59	41.71	6.68	0	36.33	50.08	21.91	7.24	14.82	94.92	9.48	15.07	81.58	41.85	25.53	0	26.37	55.25	100.62	28.41	61.94	33.57	10.34	2.01	69.07	69.93	46.36	0	12.39	28.29	43.16	14.56	15.48	33.82	0	0	34.16	41.72
467	FBtr0081513	protein_coding_gene	FBgn0000370	crc	cryptocephal	CG8669	mRNA	FBtr0081513	crc-RB		2.66	0.42	0.07	25.27	0	0	0	1.56	0.53	1.85	6.44	0	0.08	0.24	6.83	0.05	0	0	0	0.19	2.06	0.44	0.5	0.17	0.15	0.11	3.49	0.13	3.48	0.07	1.32	17.07	13.4	0	1.67	21.44	0	1.55	0
468	FBtr0332001	protein_coding_gene	FBgn0000370	crc	cryptocephal	CG8669	mRNA	FBtr0332001	crc-RE		3.46	19.53	17.21	0.73	43.2	0	2.5	13.1	1.39	8.37	34.16	0	67.15	0	5.78	14.29	0	1.47	0.33	0	59.59	6.98	79.05	11.19	13.73	0	51.33	9.99	0.64	0	1.25	13.49	60.06	0	110.12	0	13.09	3.56	0
469	FBtr0332002	protein_coding_gene	FBgn0000370	crc	cryptocephal	CG8669	mRNA	FBtr0332002	crc-RF		0	0.74	0	0	0.1	11.97	0	0	0	0	1.23	76.19	0.93	0	0	0	7.91	0.03	0	0	0	0	7.86	71.07	5.92	0	0	0	2.31	0	0	0	0	0	0	0	19.89	0	0
470	FBtr0070495	protein_coding_gene	FBgn0000376	crm	cramped	CG2714	mRNA	FBtr0070495	crm-RB		13.43	1.24	0	0	0	0	0	0	7.19	0	5.42	0	0	0	0	0	0	0	0	0	3.85	0	0	0	0	0	4.45	5.38	0	0	0	0	15.1	0	7.66	0	0	0	0
471	FBtr0070496	protein_coding_gene	FBgn0000376	crm	cramped	CG2714	mRNA	FBtr0070496	crm-RA		11.29	32.61	10.83	8.73	0	4.4	8.91	14.93	0.57	21.65	1.43	7.34	0	16.31	16.35	11.05	0	6.9	0.73	5.38	10.04	8.31	7.67	15.83	3.91	0.21	12.68	0	0.06	17.23	12.1	5.94	18.23	0.15	4.23	2.46	0	0	0
472	FBtr0070418	protein_coding_gene	FBgn0000377	crn	crooked neck	CG3193	mRNA	FBtr0070418	crn-RA		8.99	9.84	15.37	23.08	0	6.23	14.06	4.65	0.79	9.68	2.78	4.07	7.11	0	10.85	13.75	2.78	0.41	0	0.06	1.58	0.07	1.39	3.72	0	0	0.97	10.08	11.9	17.7	8.7	21.41	0.93	0	12.88	0	12.97	0.58	12.33
473	FBtr0070378	protein_coding_gene	FBgn0000382	csw	corkscrew	CG3954	mRNA	FBtr0070378	csw-RA		39.34	28.78	13.68	5.54	0	16.24	0	52.96	15.2	26.88	3.38	2.74	3.15	0	36.09	30.42	0	1.36	2.72	0	15.37	1.56	2.21	4.19	0	1.13	9.6	23.85	1.88	10.09	8.28	3.29	11.61	7.89	16.44	7.18	2.24	0	1.22
474	FBtr0070379	protein_coding_gene	FBgn0000382	csw	corkscrew	CG3954	mRNA	FBtr0070379	csw-RB		20.12	9.72	26.36	3.37	11.28	3.01	12.68	47.58	20.55	27.49	19.82	2.94	59.96	216.14	34.06	40.69	103.79	9.19	4.79	74.42	30.61	46.48	31.2	19.86	10.89	59.2	5.92	10.01	5.13	5.94	24.97	17.02	18.27	23.7	17.25	183.77	0	1.32	0.45
475	FBtr0070380	protein_coding_gene	FBgn0000382	csw	corkscrew	CG3954	mRNA	FBtr0070380	csw-RC		0	0	0	0	0	0	0	0	0	0	0	0	0	0	0	3.21	0	0	0	0	0	0	0	0	0	0	23.29	0	0	0	0	0	85.45	0	0	0	0	0	0
476	FBtr0333260	protein_coding_gene	FBgn0000382	csw	corkscrew	CG3954	mRNA	FBtr0333260	csw-RD		158.45	179.73	186.86	170.22	74.94	96.04	123.23	197.47	114.85	136.84	62.42	581.55	363.25	764.42	139.9	160.35	76.72	157.55	437.69	382.84	614.17	405.56	285.88	568.93	887.41	423.94	120.42	118.92	136.09	164.11	117.72	125.64	117.63	344.38	200.38	487.72	39.54	33.22	41.3
477	FBtr0111126	protein_coding_gene	FBgn0000384	cta	concertina	CG17678	mRNA	FBtr0111126	cta-RA		9.71	18.76	3.89	0	0	2.58	58.79	13.55	22.82	10.54	8.13	0	0	0	15.67	0	0	3.5	0	7.02	16.89	5.97	8.1	18.99	0	1.41	8.21	1.43	0	17.85	65.93	4.51	1.46	0	30.66	0	0	0.8	7.67
478	FBtr0334157	protein_coding_gene	FBgn0000384	cta	concertina	CG17678	mRNA	FBtr0334157	cta-RB		15.83	19.77	29.3	16	0.12	10.46	0.68	12.2	8.26	18.59	4.48	33.78	15.95	14.21	3.27	8.97	12.99	1.76	0.63	0	6.24	3.45	10.57	15.91	2.12	0.95	9.71	4.83	6.55	2.61	6.44	7.42	7.08	5.54	11.49	4.79	1.92	0	0.46
479	FBtr0290322	protein_coding_gene	FBgn0000392	cup	cup	CG11181	mRNA	FBtr0290322	cup-RB		0.03	0	0	0	0	0	0	0.02	0	0.19	0.46	0	0	0	0	0.02	0	0	5.5	0.02	0.24	0	0.96	0.19	0.02	0	0	0.02	0	0.05	0	0.77	0	0.33	0.01	0	0.04	0.13	0.07
480	FBtr0346452	protein_coding_gene	FBgn0000392	cup	cup	CG11181	mRNA	FBtr0346452	cup-RC		0	0.6	0.7	0	0	0	0	0	0	0	0	0	0.62	0	0	0	0	0	0	0	0	0	0	0	0	0	0	0	0	0	0	0	0	0	0	0	0	0	0
481	FBtr0070804	protein_coding_gene	FBgn0000394	cv	crossveinless	CG12410	mRNA	FBtr0070804	cv-RA		0.12	0.24	0	0	0	0	0	0.46	0	0	4.84	0	0.12	0	0	0	3.71	0	0.81	0.98	1.1	0	0.17	0.09	0	0	0.85	0.56	0	5.52	0.28	1.1	0	0	2.39	0	0.35	0.57	0.36
482	FBtr0340464	protein_coding_gene	FBgn0000394	cv	crossveinless	CG12410	mRNA	FBtr0340464	cv-RB		0	0	0	0	0	0	0	2.82	0	0.3	0	0	0	0	0	0	0	0	1.05	0	0	0	0	0	0	0	0	0	0	0	0	0	0	0	0	0	0	0	0
483	FBtr0340465	protein_coding_gene	FBgn0000394	cv	crossveinless	CG12410	mRNA	FBtr0340465	cv-RC		0	0	0	0	0	0	0	0	0	0	0	0	0	0	0	0	0	0	0	0	0	0	0	0	0	0	0	0	0	0	0	0	0	0	0	0	0	0	0
484	FBtr0071610	protein_coding_gene	FBgn0000395	cv-2	crossveinless 2	CG15671	mRNA	FBtr0071610	cv-2-RA		0.09	0.05	1.63	0.13	0	0	0	0	0.32	0.16	3.25	0	0.04	0	2.53	0	0	0	0	0	2.72	14.05	4.34	3.14	19.2	0	2.86	0	0	0	0	0.28	15.61	0.73	6.63	4.7	0	0.89	5.82
485	FBtr0076075	protein_coding_gene	FBgn0000404	CycA	Cyclin A	CG5940	mRNA	FBtr0076075	CycA-RA		0	0.3	0	0	0	0	0	0	0	0	0	0	0	0	0	0.19	0	0.95	0	0	0	0	0	0	0	0	0	0	0	0	0	0	0	0	0	0	0	0	0
486	FBtr0304650	protein_coding_gene	FBgn0000404	CycA	Cyclin A	CG5940	mRNA	FBtr0304650	CycA-RC		0	0	0	0	0	0	0	0.24	0	0	0.71	0	0	0	0	0	0	0	0	0	0.43	0	0.16	0.88	0	0	2.08	0	0	0	0	2.83	0	0	0.04	0	0	0	1.27
487	FBtr0071911	protein_coding_gene	FBgn0000405	CycB	Cyclin B	CG3510	mRNA	FBtr0071911	CycB-RA		0	0	0	0	0	0	0	0	0	0	0	0	0	0	0	0	0	0	0	0	0	0	0	0	0	0	0	0	0	0	0	0	0	0	0	0	0	0	0
488	FBtr0071913	protein_coding_gene	FBgn0000405	CycB	Cyclin B	CG3510	mRNA	FBtr0071913	CycB-RB		0	0	0	0	0	0	0	0	0	0	0	0	0	0	0	0	0	0	0	0	0	0	0	0	0	0	0	0	0	0	0	0	0	0	0	0	0	0	0
489	FBtr0071914	protein_coding_gene	FBgn0000405	CycB	Cyclin B	CG3510	mRNA	FBtr0071914	CycB-RC		0.04	0	0	0	0	0	0	0	0.52	0	0.08	0	0	0	0	7.19	0	0	0	1.23	0	1.09	0	0.18	0	0	1.47	0	0	0	0	0.22	3.35	0	0.09	0	0	0	0
490	FBtr0309858	protein_coding_gene	FBgn0000405	CycB	Cyclin B	CG3510	mRNA	FBtr0309858	CycB-RE		0	0	0	0	0	0	0	0	0	0	0	0	0	0	0	0	0	0	0	0	0	0	0	0	0	0	0	0	0	0	0	0	0	0	0	0	0	0	0
491	FBtr0080932	protein_coding_gene	FBgn0000406	Cyt-b5-r	Cytochrome b5-related	CG13279	mRNA	FBtr0080932	Cyt-b5-r-RA		0	0	0	0	0	0	0	0	0	0	0	0	0	0	0	0	0	0	0	0	0	0	0	0	0	0	2.83	0	0	0	0	0.39	0	0	0	0	0	0	0
492	FBtr0331931	protein_coding_gene	FBgn0000406	Cyt-b5-r	Cytochrome b5-related	CG13279	mRNA	FBtr0331931	Cyt-b5-r-RB		0	0	0	0	0	0	0	0	0	0	0	0	0	0	0	0	0	0	0	0	0	0	0	0	0	0	0	0	0	0	0	0	0	0	0	0	0	0	0
493	FBtr0075746	protein_coding_gene	FBgn0000411	D	Dichaete	CG5893	mRNA	FBtr0075746	D-RA		0	0	0	0	0	0	0	0	0	0	0.53	0	0	0	0	0	0	0	0	0	0	0	0	0	0	0	0	0	0	0	0	0	7.24	0	0.92	0	0	0	0
494	FBtr0333034	protein_coding_gene	FBgn0000411	D	Dichaete	CG5893	mRNA	FBtr0333034	D-RB		0	0	0	0	0	0.17	0	0	0	0	0	43.83	0	0.14	0.17	0	0	0.06	1.81	0	2.05	0	0	0	0	0	0.08	0.08	0	0	0	0	16.17	0	0	0	0	0	0
495	FBtr0333035	protein_coding_gene	FBgn0000411	D	Dichaete	CG5893	mRNA	FBtr0333035	D-RC		0	0	0	0	0	0	0	0	0.27	0	24.07	0	0	0	0	0	0.29	0	0	0	2.64	0	31.61	0	0.08	0	0	0	0	0	0	15.73	35.75	0	40.18	644.74	0	0	0
496	FBtr0333036	protein_coding_gene	FBgn0000411	D	Dichaete	CG5893	mRNA	FBtr0333036	D-RD		0	0	0	0	0	0	0	0	0	0	0	0	0	0	0	0	0	0	0	0	0	0	0	0	0	0	0	0	0	0	0	0	0.57	0	0	0	0	0	0
497	FBtr0081987	protein_coding_gene	FBgn0000412	D1	D1 chromosomal protein	CG9745	mRNA	FBtr0081987	D1-RC		0	0	0	0	0	0	0	0	0	0	28.56	0	8.65	0	0	0	0	0	0	0	72.74	0	0	106.22	0	0	19.22	0	0	0	0	9.67	20.45	0	44.4	0	0	0	0
498	FBtr0081988	protein_coding_gene	FBgn0000412	D1	D1 chromosomal protein	CG9745	mRNA	FBtr0081988	D1-RA		32.69	57.37	41.93	43.56	0	0	3.8	25.57	63.42	29.57	12.6	0	0	0	6.3	43.42	0	0	0	0	3.31	13.15	6.85	24.15	0	0	27.12	25.7	0	42.87	14.76	0	4.26	0	14.86	0	23.24	0	26.59
499	FBtr0301524	protein_coding_gene	FBgn0000412	D1	D1 chromosomal protein	CG9745	mRNA	FBtr0301524	D1-RD		63.34	52.77	82.02	24.49	75.38	77.48	90.82	49.2	0	77.1	28.59	42.1	13.43	2.99	83.58	9.76	9.26	37.04	50.2	0.97	112.85	122.27	50.66	101.98	11.78	47.26	32.29	19.81	13.82	0	48.25	40.42	45.69	592.59	0	47.44	51.3	53.64	16.92
500	FBtr0075318	protein_coding_gene	FBgn0000414	Dab	Disabled	CG9695	mRNA	FBtr0075318	Dab-RA		8.58	15.11	4.73	3.83	0.66	1.68	8.97	5.53	3.35	6.97	8.34	4.51	5.51	21.58	10.17	4.46	6.61	6.16	3.23	0.66	27.91	24.84	25.97	32.45	24.35	0.44	8.24	8	2.87	0.59	4.28	7.71	22.35	22.51	4.74	217.92	1.33	2.18	1.34
501	FBtr0305084	protein_coding_gene	FBgn0000414	Dab	Disabled	CG9695	mRNA	FBtr0305084	Dab-RC		0	0	0	54.35	23.2	5.58	0	0	0	0	2.68	5.37	0	0	0	0	5.24	0	1.25	22.51	9.35	0	0	0	0	49.91	0	4.77	14.31	0	0	0	45.11	0.24	6.71	0	1.72	0	2.09
502	FBtr0305085	protein_coding_gene	FBgn0000414	Dab	Disabled	CG9695	mRNA	FBtr0305085	Dab-RD		41.56	41.87	38.1	9.33	32.08	11.64	28.66	36.58	16.39	20.84	7.96	7.83	0	11.95	21.91	35.69	0.64	26.13	3.25	0	6.89	2.65	3.8	18.86	0	44.14	6	20.92	10.64	24.47	21.89	14.19	0	0	20.16	1	0	0	0
503	FBtr0305086	protein_coding_gene	FBgn0000414	Dab	Disabled	CG9695	mRNA	FBtr0305086	Dab-RE		0	0	0	0	0	0	0	0	0	0	0	0	46.9	0	0	0	0	0	0	0	0	0	0	0	11.87	0	0	0	0	0	0	0	0	0	0	0	0	0	0
504	FBtr0330189	protein_coding_gene	FBgn0000414	Dab	Disabled	CG9695	mRNA	FBtr0330189	Dab-RF		0	0	0	0	0	0	0	0	0	0	0	0	0	0	0	0	0	0	0	0	0	0	0	0	0	0	0	0	0	0	0	0	0	0	0	0	0	0	0
505	FBtr0330190	protein_coding_gene	FBgn0000414	Dab	Disabled	CG9695	mRNA	FBtr0330190	Dab-RG		41.56	41.87	38.1	9.33	32.08	11.64	28.66	36.58	16.39	20.84	7.96	7.83	0	11.95	21.91	35.69	0.64	26.13	3.25	0	6.89	2.65	3.8	18.86	0	44.14	6	20.92	10.64	24.47	21.89	14.19	0	0	20.16	1	0	0	0
506	FBtr0333625	protein_coding_gene	FBgn0000414	Dab	Disabled	CG9695	mRNA	FBtr0333625	Dab-RH		0	0	0.32	0	0	0	0	0	0	0	0	0	0	0	0	0	0	0	0	0	0	0	0	0	0	0	0	0	0	0	0	0	0	0	0	0	0	0.38	0
507	FBtr0333626	protein_coding_gene	FBgn0000414	Dab	Disabled	CG9695	mRNA	FBtr0333626	Dab-RI		0.27	0	0	0	0	0	0	0	0	0	0.08	0	0	0	0	0	0	0	0	0	0.15	0	0	0	0	0.09	0	0	0	0	0	0	0	0	0	0	0	0	0
508	FBtr0085713	protein_coding_gene	FBgn0000416	Sap-r	Saposin-related	CG12070	mRNA	FBtr0085713	Sap-r-RA		21	11.27	7.91	0	0	0	0	2.97	4.05	7.48	29.46	0	33.63	0	1.34	0	0	0	0	0	26.84	1.67	2.19	32.79	0	0	97.15	6.84	65.64	24.78	95.45	2.04	29.39	0	8.75	0	0	18.41	0
509	FBtr0085714	protein_coding_gene	FBgn0000416	Sap-r	Saposin-related	CG12070	mRNA	FBtr0085714	Sap-r-RB		62.54	66.3	77.23	109.01	10.75	139.06	19.58	66.06	71.52	62.1	41.63	10.23	9.49	14.25	74.59	58.11	55.84	53.52	56.81	52.06	78.9	87	38.14	0	5.57	136.01	540.72	68.23	0	57.65	13.56	107.71	36.98	32.15	67.78	1.84	16.71	0	30.34
510	FBtr0081166	protein_coding_gene	FBgn0000422	Ddc	Dopa decarboxylase	CG10697	mRNA	FBtr0081166	Ddc-RB		0	0	0	0	0	0	0	0	0	0	65.48	17.62	0	0	0	38.18	76.92	59.86	50.49	64.72	276.15	315.38	23.18	97.08	0	0	1.6	0	0	0	0	51.25	0	0	165.88	0	0	0	0
511	FBtr0081167	protein_coding_gene	FBgn0000422	Ddc	Dopa decarboxylase	CG10697	mRNA	FBtr0081167	Ddc-RC		0.6	0.91	0.93	0	16.82	18.91	8.5	1.34	0.06	0	7.38	138.42	5.33	15.26	34.14	10.36	34.28	46.13	9.25	69.22	59.84	33.43	5.95	16.91	7.76	23.95	6.73	38.87	6.48	41.19	17.44	6.36	21.51	1.01	30.89	1.38	0	0	0
512	FBtr0290291	protein_coding_gene	FBgn0000422	Ddc	Dopa decarboxylase	CG10697	mRNA	FBtr0290291	Ddc-RD		64.51	82.36	69.2	72.2	20.41	6.05	71.8	35.82	51.29	36.28	30.85	258.2	709.56	497.79	478.29	663.43	105.39	150.86	207.91	128.05	308.7	190.37	67.23	275.67	322.55	167.64	284.49	516.67	278.13	427.78	351.72	102.95	232.53	152.51	327.76	174.17	7.68	3.09	44.54
513	FBtr0088010	protein_coding_gene	FBgn0000426	SmF	Small ribonucleoprotein particle protein SmF	CG16792	mRNA	FBtr0088010	SmF-RA		13.95	19.21	0	0	0	0	0	0.43	0	3.65	0	0	0	0	12.58	0	0	0	0	0	0	0	0	0	0	0	0	0.75	0	0	0	0	0	0	0	0	116.24	25.66	54.14
514	FBtr0071145	protein_coding_gene	FBgn0000427	2020-12-01	defective chorion 1	CG2175	mRNA	FBtr0071145	dec-1-RA		0	0	0	0	0	0	0	0	0	0	0	0	0	0	0	0	0	0	0	0	0	0	0	0	0	0	0	0	0	0	0	0	0	0	0	0	0	0	0
515	FBtr0071146	protein_coding_gene	FBgn0000427	2020-12-01	defective chorion 1	CG2175	mRNA	FBtr0071146	dec-1-RB		0	0	0	0	0	0	0	0	0	0	0	0	0	0	0	0	0	0	0	0	0	0	0	0	0	0	0	0	0	0	0	0	0	0	0	0	0	0	0
516	FBtr0071147	protein_coding_gene	FBgn0000427	2020-12-01	defective chorion 1	CG2175	mRNA	FBtr0071147	dec-1-RC		0	0	0	0	0	0	0	0	0	0	0	0	0	0	0	0	0	0	0	0	0	0	0	0	0	0	0	0	0	0	0	0	0	0	0	0	0	0	0
517	FBtr0309795	protein_coding_gene	FBgn0000427	2020-12-01	defective chorion 1	CG2175	mRNA	FBtr0309795	dec-1-RE		0	0	0	0	0	0	0	0	0	0	0	0	0	0	0	0	0	0	0	0	0	0	0	0	0	0	0	0	0	0	0	0	0	0	0	0	0	0	0
518	FBtr0309796	protein_coding_gene	FBgn0000427	2020-12-01	defective chorion 1	CG2175	mRNA	FBtr0309796	dec-1-RF		0	0	0	0	0	0	0	0	0	0	0	0	0	0	0	0	0	0	0	0	0	0	0	4.16	0	0	0	0	0	0	0	0.06	0	0	0	0	0	0	0
519	FBtr0310269	protein_coding_gene	FBgn0000427	2020-12-01	defective chorion 1	CG2175	mRNA	FBtr0310269	dec-1-RG		0.14	0	0	0	0	0	0	0	0	0	0.05	0	0	0	0	0	0	0	0	0	0	0	0	0	0	0	0	0	0	0	0	0	0	0	8	0	0	0	1.25
520	FBtr0081621	protein_coding_gene	FBgn0000439	Dfd	Deformed	CG2189	mRNA	FBtr0081621	Dfd-RA		0	0	0	0.39	0	0	0	0	0	0	0.1	0	0	0	0	0	0	0	0	0	0	0	0	0	0	0	0	0	0	0	0	0	0	0	0	0	0	0	0
521	FBtr0078042	protein_coding_gene	FBgn0000442	Pkg21D	Protein kinase, cGMP-dependent at 21D	CG3324	mRNA	FBtr0078042	Pkg21D-RA		0.24	0	0	0	0	0	0	0	0	0	1.1	0	0	0	0	0	0	0	0	0	0	0	1.7	0	0	0	0	0.34	0	0	0	0.97	1.43	0	0	0	0	0	0
522	FBtr0081890	protein_coding_gene	FBgn0000447	Dhod	Dihydroorotate dehydrogenase	CG9741	mRNA	FBtr0081890	Dhod-RA		1.92	0	0	0.85	9.77	0	11.03	0.34	0.32	0.76	2.17	0	0	0	0.52	0	0	0.81	0	0	0	0	1.92	0	0	0	2.35	0.59	9.82	0.44	0.49	0	0	0	0	0	17.16	3.58	4.36
523	FBtr0300442	protein_coding_gene	FBgn0000447	Dhod	Dihydroorotate dehydrogenase	CG9741	mRNA	FBtr0300442	Dhod-RD		0	5.94	0.84	0	0	0	3.53	0	0	0	0.61	0	0	0	0	0	0	0	0	0	0	0	0	0	0	0	0	0	0.97	0	0	0	0	0	0	0	0	0	0
524	FBtr0088366	protein_coding_gene	FBgn0000448	Hr3	Hormone receptor 3	CG33183	mRNA	FBtr0088366	Hr3-RC		0	0	0	0	0	12.02	0	0	0	18.4	0	0	0	0	24.03	0	3.11	0	0	0	0	0	0	0	0	0	0	23.71	21.66	7.93	3.59	1.7	0	0	0	0	0	0	0
525	FBtr0088368	protein_coding_gene	FBgn0000448	Hr3	Hormone receptor 3	CG33183	mRNA	FBtr0088368	Hr3-RA		0	0.14	0	0	0	0	0	8.88	0	0.02	0	0	0	0	0.02	0	0	0	0	0	0	0	0	0	0	0	0	0.2	4	0.06	0	0	0	0	0	0	0	0	0
526	FBtr0112799	protein_coding_gene	FBgn0000448	Hr3	Hormone receptor 3	CG33183	mRNA	FBtr0112799	Hr3-RD		48.01	37.77	53.49	9.48	23.43	0.44	13.92	41.45	12.81	20.01	0	0	120.88	0	0.74	0	0	0	128.07	0	0	32.65	0	0	0	104.9	3.08	0	0	13.73	0	0	14.25	131.29	0	0	0	0	1.26
527	FBtr0306345	protein_coding_gene	FBgn0000448	Hr3	Hormone receptor 3	CG33183	mRNA	FBtr0306345	Hr3-RF		16.88	24.33	26.32	15.9	8.28	12.22	5.72	10.48	18.68	19.55	4.59	114.69	4.98	112.17	14.98	36.52	30.22	9.68	7.05	75.35	62.1	35.74	31.08	120.78	61.61	121.37	14.08	17.51	10.14	16.13	3.1	11.04	18.72	72.09	40.18	126.42	1.12	0	0
528	FBtr0330609	protein_coding_gene	FBgn0000448	Hr3	Hormone receptor 3	CG33183	mRNA	FBtr0330609	Hr3-RH		0	0.14	0	0	0	0	0	8.88	0	0.02	0	0	0	0	0.02	0	0	0	0	0	0	0	0	0	0	0	0	0.2	4	0.06	0	0	0	0	0	0	0	0	0
529	FBtr0452140	protein_coding_gene	FBgn0000448	Hr3	Hormone receptor 3	CG33183	mRNA	FBtr0452140	Hr3-RI		54.66	68.27	80.07	70.23	93.98	23.03	35.83	94.69	42.48	52.97	18.89	46.24	117.1	31.11	36.86	52.55	52.87	47.77	72.15	88.61	88.2	88.52	47.89	84.73	228.28	0	62.3	13.79	0.04	2.64	42.27	20.79	46.83	36.12	46.71	94.74	8.42	6.45	4.04
530	FBtr0073205	protein_coding_gene	FBgn0000449	dib	disembodied	CG12028	mRNA	FBtr0073205	dib-RA		0.17	1.19	0.22	0	0	12.43	25.7	1.17	0	2.44	1.04	0.69	42.24	7.28	0.09	0	0	0	0	0	1.91	11.92	1.72	21.36	14.97	0	7.19	0	0	0	0.17	0.79	15.16	0	6.7	86.75	0	0	0
531	FBtr0076305	protein_coding_gene	FBgn0000451	ect	ectodermal	CG6611	mRNA	FBtr0076305	ect-RA		0	0	0	0	0	0	0	0	0	0	0	0	0	0	0	0	0	0	0	0	0	0	0	0	0	0	0	0	0	0	0	0	0	0	0	0	0	0	0
532	FBtr0076307	protein_coding_gene	FBgn0000451	ect	ectodermal	CG6611	mRNA	FBtr0076307	ect-RB		0	0	0	0	0	0	0	0	0	0	0.11	0	0	0	0	0	0	0	0	0	0	0	0	0	0	0	0	0	0	0	0	0	0	0	0	0	0	0	0
533	FBtr0301385	protein_coding_gene	FBgn0000451	ect	ectodermal	CG6611	mRNA	FBtr0301385	ect-RD		0	0	0	0	0	0	0	0	0	0	0.2	0	0	0	0	0	0	0	0	0.62	0	0	0	0	0	0	0	0	0	0	0	0	0	10.84	5.98	0	0	0	0
534	FBtr0331551	protein_coding_gene	FBgn0000451	ect	ectodermal	CG6611	mRNA	FBtr0331551	ect-RE		0	0	0	0	0	0	0	0	0	0	0	0	0	0	0	0	0.07	2.83	0	0	0	0	0	0	0	0	0	0	0	0	0	0	0	0	0	0	0	0	0
535	FBtr0339899	protein_coding_gene	FBgn0000451	ect	ectodermal	CG6611	mRNA	FBtr0339899	ect-RF		0	0	0	0	0	0	0	0	0	0	0	0	0	0	0	0	0	0	0	0	0	0	0	0	0	0	0	0	0	0	0	0	0	0	0	0	0	0	0
536	FBtr0082831	protein_coding_gene	FBgn0000454	Dip-B	Dipeptidase B	CG9285	mRNA	FBtr0082831	Dip-B-RA		0.43	1.83	0.5	0	0	0	0	0	0	0	0	0	0	0	0	0	0	0	0	0	0	0	0	0	0	0	9.24	0	0	0	4.02	0	0	0	0	0	0	0	0
537	FBtr0082832	protein_coding_gene	FBgn0000454	Dip-B	Dipeptidase B	CG9285	mRNA	FBtr0082832	Dip-B-RC		0	0	0	0	0	0	0	0	0	0	0	0	0	0	0	0	0	0	0	0	0	0	0	0	0	0	0	0	0	0	0	0.36	0.41	0	0	0	0	0	0
538	FBtr0082833	protein_coding_gene	FBgn0000454	Dip-B	Dipeptidase B	CG9285	mRNA	FBtr0082833	Dip-B-RB		0	0	0	2.98	0	0	0	0	0	0	2.27	0	0	0	0	0	0	0	0	0	0	0	0	0	0	0	0	0	0	0	3.54	0	0	0	0	0	0	16.17	0
539	FBtr0345229	protein_coding_gene	FBgn0000454	Dip-B	Dipeptidase B	CG9285	mRNA	FBtr0345229	Dip-B-RD		1.48	9.91	18.93	3.02	0.05	0.39	0	2.21	0.4	2.4	1.47	0	0	0	0.3	0.9	0	0.54	0.07	0	1.35	1.94	14.64	50.98	0.09	0	29.86	4.9	1.54	0	0	0.2	0	0	11.53	0	13.82	0	1.8
540	FBtr0082597	protein_coding_gene	FBgn0000455	Dip-C	Dipeptidase C	CG5663	mRNA	FBtr0082597	Dip-C-RA		0	7.55	0	2.32	10.19	4.48	0	16.04	12.08	7.8	7	1.51	0.24	0	8.02	0	0	0.36	0	0	9.85	1.68	0	0.1	0	0	9.64	32.27	0	0.07	3.98	11.04	0	0	0	0	3.87	24.93	0.38
541	FBtr0344982	protein_coding_gene	FBgn0000455	Dip-C	Dipeptidase C	CG5663	mRNA	FBtr0344982	Dip-C-RB		8.12	0.99	6.93	0	0	0	13.45	0.66	0.46	0	0.8	0	1.49	0	0	0	0	0	37.68	0	1.07	6.34	0.04	0	0	0	1.24	0	0	0	0	0	0	0.1	18.02	0	2.71	0	0
542	FBtr0074250	protein_coding_gene	FBgn0000459	disco	disconnected	CG9908	mRNA	FBtr0074250	disco-RA		0	0	0	1.54	0	4.05	0	0	0	0	2.21	0	0	0	0	0	0	0	0	2.14	0	0	3.49	0.54	0	0	0	0	0	0	0	0	0	0	0.48	0	0	0	0
543	FBtr0100384	protein_coding_gene	FBgn0000459	disco	disconnected	CG9908	mRNA	FBtr0100384	disco-RB		0	0.07	0	0.11	0	5.84	10.28	0	0	0	0	0	0	0.07	0	0	0	1.15	0.04	12.18	0.31	0	0	0	0	0.06	0	0	0	0	0	0.2	0.3	0	0.96	0.75	0	0	0.5
544	FBtr0083739	protein_coding_gene	FBgn0000463	Dl	Delta	CG3619	mRNA	FBtr0083739	Dl-RA		0	0	0	0	0	0	0	0	0	0	0.08	0.72	0	0	0	0	0	0	0	0	1.08	0	0.19	0	0	0	5.95	0.17	0	0	0	0	1.69	0	0	0	0	0	0
545	FBtr0083740	protein_coding_gene	FBgn0000463	Dl	Delta	CG3619	mRNA	FBtr0083740	Dl-RB		0	0	0.03	0	0	0	0	0.04	0	0	0	0	3.72	0.24	0.11	0	0	0	0	0	0	0	0.14	0	0	0	4.76	0.37	0	0	0	0	0.32	0	0	0	0	0	0
546	FBtr0304658	protein_coding_gene	FBgn0000463	Dl	Delta	CG3619	mRNA	FBtr0304658	Dl-RC		0	0	0	0	0	0	0	0	0	0	0.2	47.28	0	0	0	3.81	0.03	0	0	0.06	0.88	0	0	0	0	0	0	0.4	0	0	0	0	0	0	0	0	0	0	0
547	FBtr0081260	protein_coding_gene	FBgn0000464	Lar	Leukocyte-antigen-related-like	CG10443	mRNA	FBtr0081260	Lar-RA		4.28	2.97	1.78	1.6	13.62	0	0.18	3.32	4.96	3.89	0	0	0	52.63	0	3.59	0.28	4.37	24.9	17.13	0	0	0	0	0	0	1.34	5.34	2.67	8.59	14.91	0.5	0	0.1	0	0.08	0	0	0
548	FBtr0112800	protein_coding_gene	FBgn0000464	Lar	Leukocyte-antigen-related-like	CG10443	mRNA	FBtr0112800	Lar-RB		0	0	0	0	0	3.36	0	0	0	0	0.47	0	0.2	0	3.72	0	0	0	0	0	1.55	7.59	2.39	0.64	5.08	0	0	0	0	0	0	0	0.72	0	5.45	0	1.5	0	0.54
549	FBtr0305950	protein_coding_gene	FBgn0000464	Lar	Leukocyte-antigen-related-like	CG10443	mRNA	FBtr0305950	Lar-RD		0	0	0	0	0	0	0	0	0	0	0	0	0	0	0	0	0	0	0	0	0	0	0	0	0	0	0	0	0	0.08	0	0	0	0	0	0	0	0	0
550	FBtr0331239	protein_coding_gene	FBgn0000464	Lar	Leukocyte-antigen-related-like	CG10443	mRNA	FBtr0331239	Lar-RF		5.36	6.53	4.4	0	0	37.97	0	14.73	0	7.29	1.93	4.16	0	0	48.47	33.42	2.32	4.13	0	46.18	15.67	1.45	0	0.57	0	31.57	4.62	10.18	0	22.07	0	7.11	0	0	4.01	0	0	0	0
551	FBtr0331240	protein_coding_gene	FBgn0000464	Lar	Leukocyte-antigen-related-like	CG10443	mRNA	FBtr0331240	Lar-RG		7.72	12.03	9.9	7.67	0.12	2.64	6.12	30.22	6.5	22.04	6.7	72	50.04	272.6	19.13	12.2	7.58	10.12	20.6	31.28	20.34	43.59	33.3	21.73	26.2	19.03	2.64	18.45	5.94	10.82	34.19	4.67	18.04	45.92	64.28	233.2	11.84	9.82	11.31
552	FBtr0331241	protein_coding_gene	FBgn0000464	Lar	Leukocyte-antigen-related-like	CG10443	mRNA	FBtr0331241	Lar-RH		10.55	15.25	9.19	2.39	24.91	0.08	2.51	23.34	31.59	9.86	0.51	0.03	0.6	0	3.72	13.61	2.03	0.05	0	5.6	0.67	0.83	1.9	1.65	9.64	0.6	3.77	1.72	0.97	20.07	14.84	0.13	0.81	0	3.38	0	0.86	0.4	0.88
553	FBtr0331242	protein_coding_gene	FBgn0000464	Lar	Leukocyte-antigen-related-like	CG10443	mRNA	FBtr0331242	Lar-RI		64.75	71.74	67.29	55.42	62.79	64.72	31.38	68.91	53.22	82.01	11.08	25.96	72.41	89.18	63.78	103.37	115.75	35.82	23.14	28.88	54.98	57.79	23.58	144.5	90.52	26.2	44.05	44.59	70.25	54.05	41.57	20.51	48.32	31.81	50.57	33.37	10.56	13.86	15.13
554	FBtr0086133	protein_coding_gene	FBgn0000473	Cyp6a2	Cytochrome P450-6a2	CG9438	mRNA	FBtr0086133	Cyp6a2-RA		0.57	0.87	3.58	7.6	3.09	56.86	0.48	0.71	0.06	0	5.67	0	17.35	2.03	1.31	0	0.59	0	0	0	3.06	0	0.2	0	0	0	0.31	4.06	0	2.71	7.57	2.66	0.27	0.12	1.29	0	0	0	0
555	FBtr0083538	protein_coding_gene	FBgn0000477	DNaseII	Deoxyribonuclease II	CG7780	mRNA	FBtr0083538	DNaseII-RA		1.88	3.31	9.01	0	0.25	0	0.1	6.54	0	0.74	10.96	0	13.97	0	1.5	0	0	0	1.89	0	0	0	1.37	4.75	0	0	0.13	0	0	0.3	0	4.14	0	0	3.87	0	0	0	7.47
556	FBtr0070509	protein_coding_gene	FBgn0000479	dnc	dunce	CG32498	mRNA	FBtr0070509	dnc-RB		171.26	274.5	271.6	212.03	139.17	228.23	169.97	177.43	181.05	139.92	4.47	0	0	0	15.37	28.9	0	0	0	0	0	0	0	0.02	0	1.43	0	2.62	0	8.26	15.75	15.89	0	31.57	0	0	0	0.1	0
557	FBtr0070511	protein_coding_gene	FBgn0000479	dnc	dunce	CG32498	mRNA	FBtr0070511	dnc-RI		0	0	0	0	0	11.85	0	0	0	0	0	0	0	0	0	0	0	0	0	0	0	0	0	0	0	0	0	0	0	0	0	0	0	0	0	0	0	0	0
558	FBtr0070512	protein_coding_gene	FBgn0000479	dnc	dunce	CG32498	mRNA	FBtr0070512	dnc-RC		0.91	2.99	7.95	9.1	10.02	0	20	0.27	0	0	0	0	0	0	0	0	1.09	0	0	0	0.76	0	0	0	0	0	0	0	0	1.81	0	0	0	0	0	0	0	0	0.19
559	FBtr0070513	protein_coding_gene	FBgn0000479	dnc	dunce	CG32498	mRNA	FBtr0070513	dnc-RJ		0	0	0	0	0	0	0	0	0	0	0	2.62	0	0	0	0	0	0	0.06	0	0	0	0	0	0	0	0	0	0	0	0	0	0	0	0	0	0	0	0
560	FBtr0070515	protein_coding_gene	FBgn0000479	dnc	dunce	CG32498	mRNA	FBtr0070515	dnc-RD		16.71	17.81	25.36	8.9	0.69	0	49.39	4.64	3.46	1.48	0.7	0.02	0	0	0	0	0	0	10.53	0	0.78	1.33	0	2.54	0	0	0	0	0	11.03	0.38	0.38	1.73	0	1.4	0	1.54	0.25	0
561	FBtr0070517	protein_coding_gene	FBgn0000479	dnc	dunce	CG32498	mRNA	FBtr0070517	dnc-RA		0	0	0	0	0	0	0	0	0	0	0	0	0	0	0	0	0	0	0	0	0	0	0	0	0	0	0	0	0	0	0	0	0	0	0	0	0	0	0
562	FBtr0070518	protein_coding_gene	FBgn0000479	dnc	dunce	CG32498	mRNA	FBtr0070518	dnc-RE		0	0	0	0	0	0	0	0	0	0	0	0	0	11.62	0.69	0	0	0	0	0	0	0	0	0	0	0	0	0	0	0	0	0	0	0	0	0	1.02	0	0
563	FBtr0070519	protein_coding_gene	FBgn0000479	dnc	dunce	CG32498	mRNA	FBtr0070519	dnc-RN		18.44	35.66	33.19	1.29	0.5	0	17.96	11.9	1.98	16.63	3.18	10.06	0.31	0	2.83	0	0.08	7.63	0	3.35	15.48	5.69	5.73	2.31	19.95	0	3.51	7.89	0	9.4	0	0.5	4.38	0	5.77	6.59	0	0.18	0.36
564	FBtr0070520	protein_coding_gene	FBgn0000479	dnc	dunce	CG32498	mRNA	FBtr0070520	dnc-RG		0	0	0	0	0	0	0	0	0	0	0	0	0	0	0	0	0.65	27.1	0	0	0	0	0	0	0	4.19	0	0	0	0	12.47	0	0	0.27	0	11.45	0	0	6.21
565	FBtr0070521	protein_coding_gene	FBgn0000479	dnc	dunce	CG32498	mRNA	FBtr0070521	dnc-RF		6	2.1	8.19	0.11	142.8	14.5	37.82	5.66	2.18	3.46	2.41	6.19	0	1.53	0.29	0	0.11	0.83	0	52.21	0.46	0.74	2.52	0.29	0.07	0	0.66	0.27	0	0	0	0.41	0.08	0	1.7	0	0	0	0
566	FBtr0070522	protein_coding_gene	FBgn0000479	dnc	dunce	CG32498	mRNA	FBtr0070522	dnc-RL		13.58	23.21	11.5	1.4	2.79	7.18	4.05	6.37	13.48	12.06	1.2	0.25	0	0.31	2.01	0	0.4	0.44	0.23	7.86	2.9	7.59	0.24	25.84	0.95	29.57	0.35	0.11	0	3.69	39.12	1.36	1.05	0	7.26	18.16	34.68	29.34	25.8
567	FBtr0333312	protein_coding_gene	FBgn0000479	dnc	dunce	CG32498	mRNA	FBtr0333312	dnc-RP		6.73	8.9	6.42	35.53	86.45	29.01	20.32	10.33	9.4	14.37	1.06	47.76	1.6	13.43	0.34	1.22	1.86	0	39.92	0	12.4	44.09	2.11	36.12	15.75	94.96	5.03	8.47	6.6	7.02	15.76	12.31	9.24	26.61	3.99	0	0.19	0.64	4.11
568	FBtr0333313	protein_coding_gene	FBgn0000479	dnc	dunce	CG32498	mRNA	FBtr0333313	dnc-RQ		19.22	19.27	31.87	9.43	50.13	6	32.37	23.72	19.57	23.42	30.23	673.56	30.09	9.52	12.13	0.58	136.34	117.56	172.41	340.89	363.78	353.29	210.38	183.44	370	53.17	25.85	1.82	11.48	6.58	5.03	26.93	70.77	31.41	86.88	386.34	19.29	11.92	11.18
569	FBtr0333314	protein_coding_gene	FBgn0000479	dnc	dunce	CG32498	mRNA	FBtr0333314	dnc-RR		3.09	4.8	9.34	0.25	2.93	144.02	0.1	2.09	0.76	2.45	2.62	16.99	0	0.41	4.81	4.49	38.59	21.01	184.47	124.52	16.66	16.09	3.4	13.84	1.11	13.81	5.88	0.63	0.22	9.6	13.95	0.58	8.53	8.02	6.67	72.74	0	0	1.22
570	FBtr0333315	protein_coding_gene	FBgn0000479	dnc	dunce	CG32498	mRNA	FBtr0333315	dnc-RS		1.59	0	4.66	23.56	0	4.77	1.73	0	32.88	0	0	0	0	0	0	0	0	0	0	0	0	0	0.45	0	3.73	0	0	0	0	0	0	2.5	0	0	1.45	0	0	0	2.72
571	FBtr0333316	protein_coding_gene	FBgn0000479	dnc	dunce	CG32498	mRNA	FBtr0333316	dnc-RT		158.16	177.47	212.08	168.61	222.73	2.39	37.56	99.17	5.7	23.11	5.75	0	39.08	59.78	0	15.57	15.87	6.56	23.38	9.87	39.71	14.64	0	10.11	0	0	0	7.94	11.35	4.24	0	1.28	0	52.86	13.3	0	0	0	0
572	FBtr0333317	protein_coding_gene	FBgn0000479	dnc	dunce	CG32498	mRNA	FBtr0333317	dnc-RU		135.68	153.48	140.48	51.7	44.01	116.21	173.44	111.81	19.37	126.7	5.76	22.37	67.63	0	6.62	1.05	1.02	0.11	0.16	0	8.31	4.17	10.16	2.81	4.92	2.35	2.17	17.38	0	0	0.06	0	75.78	15.78	18.77	156.9	1.17	0.21	0
573	FBtr0070269	protein_coding_gene	FBgn0000482	dor	deep orange	CG3093	mRNA	FBtr0070269	dor-RA		14.45	17.05	9.71	5.12	0	11.17	3.26	23.45	11.62	4.62	2.88	0	3.03	0	39.93	21.8	0	3.05	0.04	0	6.02	0.05	1.22	4.2	0.52	3.78	2.41	2.98	3.99	2.97	26.88	4.39	1.64	17.59	18.73	11.88	1.01	3.95	2.62
574	FBtr0075528	protein_coding_gene	FBgn0000489	Pka-C3	Protein kinase, cAMP-dependent, catalytic subunit 3	CG6117	mRNA	FBtr0075528	Pka-C3-RB		0.93	0	0	0	0	0	0	0	0	0	0	0	0	0	0	0	0.21	0	0	35.73	0	0	0	0	0	0	0	0	0	0	0	0	1.44	0	0	23.17	0	0	4.7
575	FBtr0075529	protein_coding_gene	FBgn0000489	Pka-C3	Protein kinase, cAMP-dependent, catalytic subunit 3	CG6117	mRNA	FBtr0075529	Pka-C3-RA		199.44	243.43	221.12	251.57	258.39	206.86	292.65	0.45	1.67	0.95	16.66	0.09	0.07	0	0	0	0	0.78	1.85	9.18	38.02	47.84	33.09	1.78	0.2	16.24	4.07	0	0.81	0	0	22	3.42	0.07	10.32	0	0	0.35	1.27
576	FBtr0077771	protein_coding_gene	FBgn0000490	dpp	decapentaplegic	CG9885	mRNA	FBtr0077771	dpp-RA		0	0.03	0	0	0	0	0	0	0	0	0.1	0	0	0	0	0	0	0	0	15.45	0	0	0	0	0	0	0	0	0	0	0	0	0	0	0	0	0	0	0
577	FBtr0077772	protein_coding_gene	FBgn0000490	dpp	decapentaplegic	CG9885	mRNA	FBtr0077772	dpp-RB		0	0	0	0	0	0	0	0.71	0.06	0	0.15	0.04	0	0	0	0	3.97	0.08	0	0	0	0	0	0	0	0	0	0	0	0	0	0	0	0	0	0	0	0	0
578	FBtr0077773	protein_coding_gene	FBgn0000490	dpp	decapentaplegic	CG9885	mRNA	FBtr0077773	dpp-RC		0	0	0	0	0	0	0	0	0	0	0.25	0	0	0	0	0	0	0	0	0	7.85	0	0	0	0	0	1.55	0	0	0	0	0	0	0	0	0	0	0	0
579	FBtr0077775	protein_coding_gene	FBgn0000490	dpp	decapentaplegic	CG9885	mRNA	FBtr0077775	dpp-RE		0	0	0	0	0	0	0	0	0	0	0	0	0	0	0	0	0	0	0	0	0	0	0	0	0	0	0	0	0	0	0	0	0	0	0	0	0	0	0
580	FBtr0085441	protein_coding_gene	FBgn0000492	Dr	Drop	CG1897	mRNA	FBtr0085441	Dr-RA		0	0	0	0	0	0	8.02	0	0.08	0	1.16	0	0	0	0.05	0	0	0	0	0	0	0	2.22	0	0	0	0	0	0	0	0	0.21	0.63	0	2.85	0.18	0	0	0
581	FBtr0073454	protein_coding_gene	FBgn0000499	dsh	dishevelled	CG18361	mRNA	FBtr0073454	dsh-RA		14.27	17.02	10.87	5.39	4.98	0.81	3.06	22.97	5.45	14.28	7.42	0	0.66	0.54	15.17	21.05	3.6	0.88	1.56	9.53	16.22	10.7	3.19	33.7	4.68	2.18	10.8	8.69	2.81	5.04	6.64	12.81	29.49	4.34	17.55	0.65	2.58	0.7	0.87
582	FBtr0078989	protein_coding_gene	FBgn0000500	Dsk	Drosulfakinin	CG18090	mRNA	FBtr0078989	Dsk-RA		0	0	0	0	0	0	0	0	0	0	0	0	0	0	0	0	0	0	0	0	0	0	0	0	0	0	0	0	0	0	0	0	0	0	7.29	0	0	0	0
583	FBtr0081759	protein_coding_gene	FBgn0000504	dsx	doublesex	CG11094	mRNA	FBtr0081759	dsx-RA		0	0	0	0	0	0	0	0	0	0	0	0	0	0	0	0	0	0	0	0	0	0	0	0	0	0	0	0	0	0	0	0	0	0	0	0	0	0	0
584	FBtr0081760	protein_coding_gene	FBgn0000504	dsx	doublesex	CG11094	mRNA	FBtr0081760	dsx-RB		0	0	0	0	0	0	0	0	0	0	0.7	0	0	0	0	0	0	0	0	0	0	0	0	0.83	0	0	0	0	0	0	0	0	0	0	0	0	0	0	0
585	FBtr0081761	protein_coding_gene	FBgn0000504	dsx	doublesex	CG11094	mRNA	FBtr0081761	dsx-RC		0.12	0.03	0.07	0	0	0	0	0	0	0	0.5	7.47	0	0	0	0	0	1.99	0	0.42	1.31	0	5.09	0.23	0.08	0	1.47	0	0	0	0	0.73	0	0	0	0	0	0	0
586	FBtr0330073	protein_coding_gene	FBgn0000504	dsx	doublesex	CG11094	mRNA	FBtr0330073	dsx-RD		0	0	0	0	0	0	0	0	0	0	0	0	0	0	0	0	0	0	0	0	0	0	0	0	0	0	1.9	0	0	0	0	0	0	0	0	0	0	0	0
587	FBtr0330074	protein_coding_gene	FBgn0000504	dsx	doublesex	CG11094	mRNA	FBtr0330074	dsx-RE		0	0	0	0	0	0	0	0	0	0	0	0	0	0	0	0	0	0	0	0	0	0	0	0	0	0	0	0	0	0	0	0	0	0	0	0	0	0	0
588	FBtr0339710	protein_coding_gene	FBgn0000504	dsx	doublesex	CG11094	mRNA	FBtr0339710	dsx-RF		0	0	0	0	0	0	0	0	0	0	0	0	0	0	0	0	0	0	0	0	0.91	0	0.01	0	0	0	2.95	0	0	0	0	0	0	0	0	0	0	0	0
589	FBtr0070487	protein_coding_gene	FBgn0000520	dwg	deformed wings	CG2711	mRNA	FBtr0070487	dwg-RA		7.27	3.08	1.2	7.84	0	0	0.9	0.58	0.31	4.56	2.68	0	0	0	3.5	5.34	0.28	0.71	0.13	0	0.39	6.98	0.42	0	0	1.84	0.24	4.6	0.5	13.5	0.37	3.45	0	0.87	14.75	7.44	0.15	0	0
590	FBtr0070914	protein_coding_gene	FBgn0000524	dx	deltex	CG3929	mRNA	FBtr0070914	dx-RA		0	0	0.3	0	0	0.02	0	0.04	0	0.65	5.91	0.07	0.71	0	0	0.25	0	0	0	0	0	0.8	0.72	4.11	0.03	0	2.91	0.55	0.95	0	0	4.26	0	0	0	0	0	0	0
591	FBtr0084106	protein_coding_gene	FBgn0000527	e	ebony	CG3331	mRNA	FBtr0084106	e-RA		0.55	0.31	0	0	0	0	0.03	1.72	0	0	3.87	0	0	0	0	0	0	0.77	0	0	0	0.46	0.97	8.04	0	0	0	0	0	0	0	21.49	0.17	0	0.27	0	0	0	0
592	FBtr0089320	protein_coding_gene	FBgn0000529	bsh	brain-specific homeobox	CG10604	mRNA	FBtr0089320	bsh-RB		0	0	0	0	0	0	0	0	0	0	2.87	67.3	0	0.11	0	0	2.54	6.2	32.57	8.27	56.65	0.08	0	0	0	0	0	0	0	0	0	0	0.14	0	0	0	0	0	0
593	FBtr0343855	protein_coding_gene	FBgn0000529	bsh	brain-specific homeobox	CG10604	mRNA	FBtr0343855	bsh-RC		0.71	0	0.91	0	0	0	0	0	0	0	2.48	0	0.17	0	0	0	7.27	0	0	0	27.15	0	0.06	0	0	0	0	0	0	0	0	0	0.02	0	0	0	0	0	0
594	FBtr0083083	protein_coding_gene	FBgn0000533	ea	easter	CG4920	mRNA	FBtr0083083	ea-RA		0	0	0	0	0	0	0	0	0	0	0.06	0	0	0	0	0	0	0	0	0	0	0	0	0	0	0	0	0	0	0	0	0	0	0	0	0	2.93	4.12	9.54
595	FBtr0334588	protein_coding_gene	FBgn0000533	ea	easter	CG4920	mRNA	FBtr0334588	ea-RB		0	0	0	0	0	0	0	0	0	0	0	0	0	0	0	0	0	0	0	0	0	0	0	0	0	0	0	0	0	0	0	0	0	0	0	0	0	0	0
596	FBtr0073955	protein_coding_gene	FBgn0000535	eag	ether a go-go	CG10952	mRNA	FBtr0073955	eag-RA		15.52	2.93	21.15	91.7	143.28	195.7	136.79	24.12	0	0	4.5	137.27	0	89	68.56	0	50.67	50.73	225.88	100.87	60.09	0	0.91	126.86	143.2	147.43	6.16	0.81	0.12	9.44	13.14	12.17	20.89	5.34	4.77	99.63	3.62	4.11	5.68
597	FBtr0111009	protein_coding_gene	FBgn0000535	eag	ether a go-go	CG10952	mRNA	FBtr0111009	eag-RB		0	0	0	0	0	7.05	0	4.84	0	0	2.24	0	0.65	0	0	16.4	0	0	0	0	0	0	1.82	0.03	0	0	0	0	0	0.77	0	0.38	0	0	0	0	0	0	0
598	FBtr0303285	protein_coding_gene	FBgn0000535	eag	ether a go-go	CG10952	mRNA	FBtr0303285	eag-RC		0.03	0	5.98	16.21	0	20.58	17.18	7.18	0	0	0	41.17	0	0	1.2	0.8	0	11.09	0	1.64	0	0	0	0	0	0	0	0	0	0	0	0.71	0	0	0	0.49	0	0	0.25
599	FBtr0303286	protein_coding_gene	FBgn0000535	eag	ether a go-go	CG10952	mRNA	FBtr0303286	eag-RD		3.68	13.97	14.75	1.74	0	0	0	7.48	3.42	11.04	1.42	0	75.36	0	7.02	0	1.82	0	0	0.91	0	0	0	2.1	0	0	0	0	0	0	0	2.05	0	0	11	0	0	0	0
600	FBtr0310014	protein_coding_gene	FBgn0000535	eag	ether a go-go	CG10952	mRNA	FBtr0310014	eag-RE		5.91	3.51	0.23	0	38.18	0.01	0	48.69	19.11	36.12	1.18	2.8	19.88	70.93	1.61	43.64	3.28	0	77.1	19.95	13.55	44.92	3.7	37.68	1.73	1.15	0.84	2.2	0	0.74	0	0	12.36	21.04	6.99	26.25	0.84	0	0
601	FBtr0310015	protein_coding_gene	FBgn0000535	eag	ether a go-go	CG10952	mRNA	FBtr0310015	eag-RF		0	1.89	0	0	0	0	0	7.6	3.75	0	1.48	0	0	0	0	0	0	0	0	0	0	4.37	0	0	0	0.45	0	0	0	0	0	0	0	0	0.72	0	0	0	1.9
602	FBtr0310016	protein_coding_gene	FBgn0000535	eag	ether a go-go	CG10952	mRNA	FBtr0310016	eag-RG		12.83	19.29	2.71	2.91	59.51	0	25.74	104.63	75.84	68.47	8.97	30.65	5.43	0	20.13	88.7	0	0	0	0	78.09	86.78	54.38	25.87	1.86	60.12	0	0	0	2.78	2.44	10.18	0.32	0.75	24.84	0	0	0	0
603	FBtr0074211	protein_coding_gene	FBgn0000536	eas	easily shocked	CG3525	mRNA	FBtr0074211	eas-RB		0	0	0	0	0	0	0	0	0	0.45	0	0	0	0	0	0	0	0	0	0	0	0	0	4.15	0	0	0	0	0	0	0	0	0	2.54	0	0	0	0	0
604	FBtr0074212	protein_coding_gene	FBgn0000536	eas	easily shocked	CG3525	mRNA	FBtr0074212	eas-RA		16.29	9.59	5.19	2.02	0	3.61	0	2.91	13.18	0	0.5	0.25	0	277.2	0	10.6	14.51	0	7	0	0	0	0	7.33	0	0	2.87	6.72	0	0	0	1.05	14.53	0	2.53	26.5	2.61	10.97	0
605	FBtr0074214	protein_coding_gene	FBgn0000536	eas	easily shocked	CG3525	mRNA	FBtr0074214	eas-RC		0	2.47	0	0	0	0	0.14	0	0	0	3.56	0	0	0	0	0	0	0	0	0.53	0.42	3.34	0	2.75	0	0	0	2.89	0	8.19	0	0	0	0	1.16	0	0	0.16	0
606	FBtr0308617	protein_coding_gene	FBgn0000536	eas	easily shocked	CG3525	mRNA	FBtr0308617	eas-RF		9.11	10.85	13.9	0	0	0	0.23	2.59	1.83	11.94	2.83	0	0	0	5.91	12.03	0	0	0	0	11.29	0	6.19	11.25	0	0	5.15	5.96	2.37	6.11	0	5.75	14.91	0	10.2	0	0	0	2
607	FBtr0308618	protein_coding_gene	FBgn0000536	eas	easily shocked	CG3525	mRNA	FBtr0308618	eas-RG		0	0	0	0	0	0	0	0	0	0	0	0	0	0.16	0	0	0	0	0	0	0	0	0	0	0	0	0	0	0	0	0	0	0	0	0	0	0	0	0
608	FBtr0308619	protein_coding_gene	FBgn0000536	eas	easily shocked	CG3525	mRNA	FBtr0308619	eas-RH		0	0	0	0	0	0	0	0	0	0	0	0	0	0	0	0	0	0	0	0	0	0	3.49	0	3.85	0	0	0	0	0	0	4.3	0	0	0	0	0	0	0
609	FBtr0343519	protein_coding_gene	FBgn0000536	eas	easily shocked	CG3525	mRNA	FBtr0343519	eas-RI		0	0	0	0	0	0	0	0	0	0	0	0	0	0	0	0	0	0	0	0	0	0	0	0	0	0	0	0	0	0	0	0	0	0	0	0	0	0	0
610	FBtr0343520	protein_coding_gene	FBgn0000536	eas	easily shocked	CG3525	mRNA	FBtr0343520	eas-RJ		0	0	0	1.61	1.8	3.14	0	3.31	1.4	0	0	0	13.28	229.11	0	0	11.13	0.13	0.27	0.23	0	2.3	1.64	0	0	5.28	0	0	0	0	0.62	0	0	0.78	0	8.6	0	0.87	0
611	FBtr0072521	protein_coding_gene	FBgn0000541	E(bx)	Enhancer of bithorax	CG32346	mRNA	FBtr0072521	E(bx)-RA		29.55	0	0	0	0	0	0	0	14.48	0	0	0	0	0	0	0	0	0	0	0	0	0	0	0	0	0	0	0	0	0	45.96	10.96	0	0	0	311.39	0	0	0
612	FBtr0072522	protein_coding_gene	FBgn0000541	E(bx)	Enhancer of bithorax	CG32346	mRNA	FBtr0072522	E(bx)-RB		2.5	2.37	3.78	0	0.61	0	0	0	0	0	3.95	4	10.65	0	0.04	40.59	0	1.62	0	0	5.58	0	0	41.85	0	0	0	0	0	0	0.11	0	1.54	0	0	0	3.19	0	4.98
613	FBtr0072523	protein_coding_gene	FBgn0000541	E(bx)	Enhancer of bithorax	CG32346	mRNA	FBtr0072523	E(bx)-RC		9.57	13.63	13.48	0.7	0	0	0	22.37	5.08	8.72	4.02	0	0	0	14.67	16.75	0	0.34	6.37	0	7.63	6.01	0	0.23	0	2.54	2.81	0.94	0	4.68	3.29	25.95	12.52	4.58	0	6.97	0.83	0	0.91
614	FBtr0301348	protein_coding_gene	FBgn0000541	E(bx)	Enhancer of bithorax	CG32346	mRNA	FBtr0301348	E(bx)-RE		0	0	0	0	0	0	0	0	0	0	0.67	0	0	0	13.63	39.86	0	0	0	0	0	0	0	0	0	0	0	100.84	0	3.4	0.02	0	77.19	0	0	0	0	0	0
615	FBtr0301349	protein_coding_gene	FBgn0000541	E(bx)	Enhancer of bithorax	CG32346	mRNA	FBtr0301349	E(bx)-RF		0	7.63	1.85	3.42	11.16	17.29	93.24	5.2	1.97	10.86	1.4	2.59	96.58	1.2	1.41	0.38	5.43	0.68	0	0	0.02	0	15.46	12.03	17.08	5.34	19.58	0	1.19	0	0	0	0	0.6	14.93	0	2.29	1.17	0
616	FBtr0332101	protein_coding_gene	FBgn0000541	E(bx)	Enhancer of bithorax	CG32346	mRNA	FBtr0332101	E(bx)-RG		39.15	33.09	41.48	26.68	29.55	119.39	19.45	33.84	8.37	60.06	8.95	0	6.47	56.13	23.7	1.53	0	4.49	0	2.65	12.69	2.91	8.63	79.28	229.72	0	19.41	1.16	5.19	55.95	2.76	5.33	6.23	12.01	26.62	30.74	0	0	0
617	FBtr0332102	protein_coding_gene	FBgn0000541	E(bx)	Enhancer of bithorax	CG32346	mRNA	FBtr0332102	E(bx)-RH		8.24	11.26	13.14	34.1	4.7	10.8	31.37	24.22	5.95	6.53	6.27	6.63	66.02	22.88	8.44	13.8	5.03	2.71	0	0	21.64	3.05	11.78	37.19	5.31	2.53	9.6	2.64	1.5	13.46	18.7	8.68	20.57	0	25.62	19.23	0	0	0
618	FBtr0332103	protein_coding_gene	FBgn0000541	E(bx)	Enhancer of bithorax	CG32346	mRNA	FBtr0332103	E(bx)-RI		0	0	0	0	0	0	22.62	0	60.66	5.19	0.45	0	0	0	0	0	0	0	0	0	0	0	0	45.93	0	0	0.58	0	0	0	0	2.04	1.76	0	0	0	0	0	0
619	FBtr0332104	protein_coding_gene	FBgn0000541	E(bx)	Enhancer of bithorax	CG32346	mRNA	FBtr0332104	E(bx)-RJ		67.87	116.74	93.2	93.36	98.68	2.7	57.28	109.65	0	86.3	28.4	93.66	299.19	149.5	78.04	92.32	103.11	96.89	57.83	61.11	109.09	144.58	118.23	59.17	0	127.64	48.73	0	104.42	22.16	28.88	28.03	53.52	131.76	81.1	0	0	2.62	0
620	FBtr0070606	protein_coding_gene	FBgn0000542	ec	echinus	CG2904	mRNA	FBtr0070606	ec-RA		0	0	0	0	0	0	0	0	0	0	0	0	0	0	0	0	0	0	0	0	0.71	0	0	0	0	0	0	0	0	0	0	0	0	0	0	0	0	0	0
621	FBtr0112801	protein_coding_gene	FBgn0000542	ec	echinus	CG2904	mRNA	FBtr0112801	ec-RB		0	0	0	0	0	0	0	0	0	0	0	0	0	0	0	0	0	0	0	0	0	0	0	0	0	0	0	0	0	0	0	0	0	0	0	0	0	0	0
622	FBtr0112802	protein_coding_gene	FBgn0000542	ec	echinus	CG2904	mRNA	FBtr0112802	ec-RC		0.01	0	0.11	0	2.82	0	0.02	0.17	0	0	0.05	0	0	0.03	0	0	0.02	0	0	0.02	0	0	0.01	0.02	0.04	0	0.03	0.04	0	0.02	0.01	0.02	0	1.74	0	0	0	0	0
623	FBtr0072903	protein_coding_gene	FBgn0000543	ecd	ecdysoneless	CG5714	mRNA	FBtr0072903	ecd-RA		1.97	6.54	5.48	1.08	1.81	2.1	0	6.39	0	4.17	1.46	1.05	0	0	10.61	0.62	0	1.4	0	0	0	3.75	0	0	0	0	5.42	19.16	0	9.71	2.1	0	0	0	0	0	1.37	0.47	6.93
624	FBtr0086008	protein_coding_gene	FBgn0000546	EcR	Ecdysone receptor	CG1765	mRNA	FBtr0086008	EcR-RA		0.79	4.29	3.43	11.12	1.73	0.57	0.96	48.66	0.61	3.66	0.86	0.3	22.56	0	19.59	3.13	0	0	0	0	13.69	1.7	1.3	13.5	1.7	0.18	6.66	5.84	18.41	1.56	21.1	0.39	6.99	31.62	13	0	0	0	0
625	FBtr0086009	protein_coding_gene	FBgn0000546	EcR	Ecdysone receptor	CG1765	mRNA	FBtr0086009	EcR-RD		18.14	7.09	3.47	1.26	1.36	57.79	1.16	32.39	0	26.82	4.51	0	0	0	7.02	39.98	0.45	1.68	0	0	3.72	6.46	0	0	0	3.95	0	22.78	25.24	1.92	25.36	22.84	0.93	11.54	21.82	5.48	1.93	10.78	13.2
626	FBtr0086010	protein_coding_gene	FBgn0000546	EcR	Ecdysone receptor	CG1765	mRNA	FBtr0086010	EcR-RE		5.62	20.66	15.53	1.59	0.09	0	7.07	1.87	16.33	14.96	4.36	1.44	14.35	42.91	4.54	4.16	0.13	1.86	1.12	36.09	18.79	3.83	3	40.35	96.6	0	14.52	14.17	6.16	3.73	2.47	0	49.52	1.49	11.61	0	1.07	0	0
627	FBtr0086011	protein_coding_gene	FBgn0000546	EcR	Ecdysone receptor	CG1765	mRNA	FBtr0086011	EcR-RB		0	0	0	0	0	0	0	0	0	4.27	0	0	0	0	9.77	8.75	0	3.76	0	0	0	0	0	0	0	62.73	0	9.33	5.75	0	24.24	3.06	0	0	0	0	0	1.44	0
628	FBtr0086012	protein_coding_gene	FBgn0000546	EcR	Ecdysone receptor	CG1765	mRNA	FBtr0086012	EcR-RC		10.95	8.7	7.21	32.05	51.39	0.27	27.25	48.55	19.89	46.04	4.05	35.53	6.76	36.16	9.32	14.58	20.59	3.09	22.85	21.42	18.59	5.84	19.91	21.04	27.96	94.79	54.68	12.88	3.44	13.96	0	13.75	9.14	18.76	5.96	63.07	0	0.79	0
629	FBtr0302439	protein_coding_gene	FBgn0000546	EcR	Ecdysone receptor	CG1765	mRNA	FBtr0302439	EcR-RG		11.69	10.76	14.7	16.39	0.15	18.24	13.45	36.24	37.02	33.66	8.25	43.14	55.44	29.62	15.23	18.63	16.37	8.82	19.61	37.27	19.13	24.06	20.6	43.32	68.69	67.7	23.94	14.94	1.87	10.05	15.41	11.27	55.55	23.09	41.57	105.4	0	0	2.63
630	FBtr0077465	protein_coding_gene	FBgn0000547	ed	echinoid	CG12676	mRNA	FBtr0077465	ed-RA		0	0	0	0	0	0	0	0	5.36	2.67	0	0	0	0	0.15	0.56	0	0	0	0	0	0	0	0	0	14.88	0	1.95	0.27	0	0	0	0	0	0	0	0	0	0
631	FBtr0334265	protein_coding_gene	FBgn0000547	ed	echinoid	CG12676	mRNA	FBtr0334265	ed-RB		19.18	24.86	24.26	3.19	0.09	5.84	14.22	4.3	0.58	1.04	8.18	97.81	2.11	4.13	0	0	19.77	20.74	39.02	81	60.25	68	24.14	0.85	0.02	1.3	5.34	0	0.18	12.81	9.58	12.28	11.79	13.3	15.56	6.38	0	0	0
632	FBtr0334266	protein_coding_gene	FBgn0000547	ed	echinoid	CG12676	mRNA	FBtr0334266	ed-RC		19.21	23.72	40.92	14.54	0	0	0	1.39	1.72	0	4	4.66	0	0.56	0	0	76.46	12.17	0.15	39.3	23.77	31.91	2.25	0.05	0	0	0.61	0	0	45.05	22.37	9.41	0	0.05	0	0	0	0	0
633	FBtr0078408	protein_coding_gene	FBgn0000551	Edg78E	Ecdysone-dependent gene 78E	CG7673	mRNA	FBtr0078408	Edg78E-RA		0.24	0	0	0	0	0	0	0	0	0.14	0	0	0	0	0	0	0	0.3	0	0	0.3	0	0	0	0	9.5	0	0	0	0	0	0	0	0	0	0	0	0	0
634	FBtr0344634	protein_coding_gene	FBgn0000551	Edg78E	Ecdysone-dependent gene 78E	CG7673	mRNA	FBtr0344634	Edg78E-RB		0	0	0	0	0	0	0	0	0	0	0	0	0	0	0	0	0	0	0	0	0	0	0	0	0	0	0	0	0	0	0	0	0	0	0	0	0	0	0
635	FBtr0081688	protein_coding_gene	FBgn0000552	Edg84A	Ecdysone-dependent gene 84A	CG2345	mRNA	FBtr0081688	Edg84A-RA		0	0	0	0	0	0	0	0	0	0	0	0	0	0	0	0	0	0	0	0	0	0	0	0	0	0	0	0	0	0	0	0	0	0	0	0	0	0	0
636	FBtr0085832	protein_coding_gene	FBgn0000557	eEF1α2	eukaryotic translation elongation factor 1 alpha 2	CG1873	mRNA	FBtr0085832	eEF1α2-RA		32.94	23.83	22.09	0	0	0	9.57	15.32	72.94	104.83	121.46	0	0	0	73.89	16.29	0	0	0	0	27.24	0.28	0	96.16	0	1.72	0	0	0	0	0	331.61	107.15	0	112.71	0	0	25.01	125.94
637	FBtr0085833	protein_coding_gene	FBgn0000557	eEF1α2	eukaryotic translation elongation factor 1 alpha 2	CG1873	mRNA	FBtr0085833	eEF1α2-RB		265.31	358.58	501.13	86.51	0.08	524.65	95.47	201.17	337.15	447.82	87.78	0.15	0.02	0.02	268.96	92.15	0.13	0.13	40.21	0.14	660.52	16.21	0	11.04	0.08	61.43	0.01	32.77	0.11	239	412.09	0	102.05	0.05	0.56	0.09	0.06	71.24	142.4
638	FBtr0085834	protein_coding_gene	FBgn0000557	eEF1α2	eukaryotic translation elongation factor 1 alpha 2	CG1873	mRNA	FBtr0085834	eEF1α2-RC		612.58	724.18	549.07	412.49	271.33	23.23	429.4	764.87	63.8	251.7	75.94	925.31	700.59	255.28	194.36	329.68	397.99	402.04	433.34	909.16	440.83	691.86	339.81	786.26	1022.94	1078.85	313.87	479.51	594.03	226.84	128.51	0	437.61	223.52	147.42	1054.37	126.93	1.31	0.2
639	FBtr0085835	protein_coding_gene	FBgn0000557	eEF1α2	eukaryotic translation elongation factor 1 alpha 2	CG1873	mRNA	FBtr0085835	eEF1α2-RD		86.36	75.74	70.35	0	0	0	42.65	108.09	53.44	55.92	2.46	0	0	0	19.06	0	0	0	0	0	0.01	148.75	0	6.8	0	29.79	21.9	29.38	0	60.45	0	10.07	0	0	107.54	0	68.19	159.45	0.22
640	FBtr0085911	protein_coding_gene	FBgn0000559	eEF2	eukaryotic translation elongation factor 2	CG2238	mRNA	FBtr0085911	eEF2-RA		139.39	153.99	136.7	0	0	49.06	65.21	168.32	197.9	122.55	0	0	0	28.09	105.65	0	0	0	0	3.32	0	0	0	0	0.94	0	0	77.9	53.45	0	40.61	0	0	103.57	0	0	19.25	0	43.89
641	FBtr0085912	protein_coding_gene	FBgn0000559	eEF2	eukaryotic translation elongation factor 2	CG2238	mRNA	FBtr0085912	eEF2-RC		17.89	12.63	11.55	26.58	0	0	8.67	11.27	11.85	4.72	6.11	0	0	0	7.74	6.52	0	0	0	0	0	0	0.48	0	0	0	2.96	17.1	29.12	74.59	8.15	10.73	1.66	0	7.35	0	22.4	39.08	0
642	FBtr0332966	protein_coding_gene	FBgn0000559	eEF2	eukaryotic translation elongation factor 2	CG2238	mRNA	FBtr0332966	eEF2-RD		33.03	15.78	26.68	92.04	120.83	11.97	141.71	27.43	2.8	40.17	106.78	7.71	86.84	1.74	31.91	149.03	30.4	48.13	18.62	1.63	69.26	16.83	25.54	37.85	0.13	0.73	102.68	22.28	1.47	54.63	17.33	93.66	70	50.63	60.67	120.45	41.99	30.14	43.8
643	FBtr0078437	protein_coding_gene	FBgn0000560	eg	eagle	CG7383	mRNA	FBtr0078437	eg-RB		0	0	0	0	0	0	0	0	0	0	0	0	0	0	0	0	0	0	0	0	0	0	0	0	0	0	0	0	0	0	0	0	0	0	0	0	0	0	0
644	FBtr0078438	protein_coding_gene	FBgn0000560	eg	eagle	CG7383	mRNA	FBtr0078438	eg-RA		0	0	0	0	0	0	0	0	0	0	0	0	0	0	0	0	0	0	0	0	0	0.49	0	0	0	0	0	0	0	0	0	0	0	0	0	0	0	0	0
645	FBtr0332810	protein_coding_gene	FBgn0000560	eg	eagle	CG7383	mRNA	FBtr0332810	eg-RC		0	0	0	0	0	0	0.57	0	0	0	0	0	0	0	0	0	0	0	0	0	0	0	0	0	0	0	0	0	0	0	0	0	0	0	0	0	0	0	0
646	FBtr0114586	protein_coding_gene	FBgn0000562	egl	egalitarian	CG4051	mRNA	FBtr0114586	egl-RB		14.46	18.79	17.08	1.7	34.82	7.66	7.24	28.29	8.2	25.03	6.2	0.7	0	0	5.18	0.43	3.09	2.71	6	4.18	5.81	29.73	5.99	14.74	8.25	48.42	24.75	11.53	2.4	19.87	1.44	5.9	22.53	0	25.62	18.57	0	0	0.34
647	FBtr0343272	protein_coding_gene	FBgn0000562	egl	egalitarian	CG4051	mRNA	FBtr0343272	egl-RC		0	0	0	21.8	0	0	0	0	3.2	0	0	3.1	0.6	0.72	0	0	0	4.04	0	0	0	0	0	13.21	0.06	0	8.86	15.58	0	15.91	2.26	0	0	4.2	0	0	0.96	0.83	0
648	FBtr0083444	protein_coding_gene	FBgn0000564	Eh	Eclosion hormone	CG5400	mRNA	FBtr0083444	Eh-RA		0	0	0	0	0	0	0	0	0	0	0.5	0	0	0	0	0	0	0	0	0	0	0	39.87	0	0	0	0	0	0	0	0	0	0	0	0.83	0	0	0	0
649	FBtr0334930	protein_coding_gene	FBgn0000564	Eh	Eclosion hormone	CG5400	mRNA	FBtr0334930	Eh-RB		0	0	0	0	0	0	0	0	0	0	0	0	0	0	0	0	0	0	0	0	0	0	0	0	0	0	0	0	0	0	0	0	0	0	0	0	0	0	0
650	FBtr0075552	protein_coding_gene	FBgn0000565	MsrA	Methionine sulfoxide reductase A	CG7266	mRNA	FBtr0075552	MsrA-RC		0.37	0.33	0.61	0	0	0.77	0	0	0	0	20.8	0	30.5	0	0	0.42	0	0.14	0	0	1.32	11.2	5.81	4.86	0	0	25.91	0	0	0	0	1.79	0.78	0	0	0	0	0	1.43
651	FBtr0075553	protein_coding_gene	FBgn0000565	MsrA	Methionine sulfoxide reductase A	CG7266	mRNA	FBtr0075553	MsrA-RA		0	0	0	0	0	0	0	0	0	0	9.34	0	0	0	6.42	0	0	0	0	0	0	0	2.01	0	0	0	0	0	0	0	0	10.83	0	0	5.28	0	0	0	0
652	FBtr0075554	protein_coding_gene	FBgn0000565	MsrA	Methionine sulfoxide reductase A	CG7266	mRNA	FBtr0075554	MsrA-RB		0	0	0	0	0	0	0	0	0	0	0	0	0	0	0	0	0	0	0	0	0	22.17	0	0	0	0	0	0	0	0	0	0	0	0	0	0	0	0	0
653	FBtr0303531	protein_coding_gene	FBgn0000565	MsrA	Methionine sulfoxide reductase A	CG7266	mRNA	FBtr0303531	MsrA-RE		17.63	9.28	14.41	0.95	27.99	12.59	0	6.07	28.64	2.2	19.36	1.29	89.37	1.32	5.49	34.93	0	0	0.92	0	0	1.1	3.43	9.68	0.34	0	70.68	0.91	0	32.8	12.33	0	0	0	0	0	37.74	26.83	53.3
654	FBtr0330176	protein_coding_gene	FBgn0000565	MsrA	Methionine sulfoxide reductase A	CG7266	mRNA	FBtr0330176	MsrA-RF		0	0	0	0	0	0.62	0	0	1.51	0	0	0	0	0	0	0	0	11.09	0	0	11.29	0	0	0	0	0	33.37	0	0	0	0	1.51	7.99	0	26.01	0	0	0	0
655	FBtr0330177	protein_coding_gene	FBgn0000565	MsrA	Methionine sulfoxide reductase A	CG7266	mRNA	FBtr0330177	MsrA-RG		0	0	0	0	0	0	0	0	0	0	9.34	0	0	0	6.42	0	0	0	0	0	0	0	2.01	0	0	0	0	0	0	0	0	10.83	0	0	5.28	0	0	0	0
656	FBtr0086710	protein_coding_gene	FBgn0000566	Eip55E	Ecdysone-induced protein 55E	CG5345	mRNA	FBtr0086710	Eip55E-RA		5.25	5.64	0	0	0	0	0.51	0.89	0.39	3.49	0	0	0	0	0	0	0	0.4	0	0	9.19	0	0	6.43	0	0	0	0	0	3.68	0.08	0	0	0	0	0	0	12.85	15.37
657	FBtr0345422	protein_coding_gene	FBgn0000566	Eip55E	Ecdysone-induced protein 55E	CG5345	mRNA	FBtr0345422	Eip55E-RB		0	0	0	0	0	0	0	0	0	0	2.77	0	0	0	0	0.87	0	0	0	0	0	0	2.63	0	0	2.28	2.31	20.94	0	8.07	0	0	0	0	0	0	4.76	5.18	2.34
658	FBtr0075202	protein_coding_gene	FBgn0000567	Eip74EF	Ecdysone-induced protein 74EF	CG32180	mRNA	FBtr0075202	Eip74EF-RA		0.1	0.06	0.15	0	0.24	0.1	0.8	0.66	0.43	0.72	1.81	0	0	8.18	0.02	0.02	0	0.12	8.12	0.02	2.92	0.36	5.27	6.79	2.16	0.85	0.76	0.21	0	0	0	0.43	4.77	1.51	0.99	0.15	0	0	0
659	FBtr0075203	protein_coding_gene	FBgn0000567	Eip74EF	Ecdysone-induced protein 74EF	CG32180	mRNA	FBtr0075203	Eip74EF-RC		0.1	0.06	0.15	0	0.24	0.1	0.8	0.66	0.43	0.72	1.81	0	0	8.18	0.02	0.02	0	0.12	8.12	0.02	2.92	0.36	5.27	6.79	2.16	0.85	0.76	0.21	0	0	0	0.43	4.77	1.51	0.99	0.15	0	0	0
660	FBtr0075204	protein_coding_gene	FBgn0000567	Eip74EF	Ecdysone-induced protein 74EF	CG32180	mRNA	FBtr0075204	Eip74EF-RB		20.68	20.38	20.63	27.97	16.98	26.66	2.83	32.6	14.75	10.6	8.93	8.01	23.07	203.22	10.66	9.06	26.14	10.97	9.47	51.46	44.3	43.12	19.44	50.95	133.94	71.95	36.92	44.43	8.72	54.29	16.81	15.04	26.94	21.09	14.5	92.97	0.06	2.12	1.94
661	FBtr0100411	protein_coding_gene	FBgn0000567	Eip74EF	Ecdysone-induced protein 74EF	CG32180	mRNA	FBtr0100411	Eip74EF-RD		1.74	3.11	3.17	2.73	0.13	2	5.46	4.39	2.62	2.5	1.95	3.17	15.96	4.7	0.46	2.65	1.5	3.53	0.09	0	13.85	21.84	5.86	25.36	33	2.08	17.41	4.96	13.4	2.13	1.33	4.3	45.77	11.06	19.72	1.84	0	0.22	0
662	FBtr0305796	protein_coding_gene	FBgn0000567	Eip74EF	Ecdysone-induced protein 74EF	CG32180	mRNA	FBtr0305796	Eip74EF-RE		0.1	0.06	0.15	0	0.24	0.1	0.8	0.66	0.43	0.72	1.81	0	0	8.18	0.02	0.02	0	0.12	8.12	0.02	2.92	0.36	5.27	6.79	2.16	0.85	0.76	0.21	0	0	0	0.43	4.77	1.51	0.99	0.15	0	0	0
663	FBtr0075148	protein_coding_gene	FBgn0000568	Eip75B	Ecdysone-induced protein 75B	CG8127	mRNA	FBtr0075148	Eip75B-RB		0	0	0	0	0	0	0	0	0	0	0	0	0	0	0	0	0	0	0	0	0	0	0	0	0	0	0	0	0	0	0	0	0	0	0	0	0	0	0
664	FBtr0075149	protein_coding_gene	FBgn0000568	Eip75B	Ecdysone-induced protein 75B	CG8127	mRNA	FBtr0075149	Eip75B-RC		11.4	15.79	27.88	2.43	0	3.72	0.38	16.78	0.72	20.57	9.96	52.62	66.16	935.41	50.09	18.43	73.03	135	0.81	1.25	7.88	0.8	259.14	9.02	402.64	131.41	34.95	10.84	3.29	0.16	5.62	6.94	3.69	147.8	8.84	92.06	0	1.01	0
665	FBtr0075150	protein_coding_gene	FBgn0000568	Eip75B	Ecdysone-induced protein 75B	CG8127	mRNA	FBtr0075150	Eip75B-RA		11.79	6.43	6.52	0.06	38.16	4.23	0	11.76	1.12	33.01	6.77	0	0	0	0.88	11.36	0	0.9	100.18	0.62	3.35	38.48	18.98	15.01	66.85	61.25	14.43	0	19.82	28	6.06	2.55	8.79	36.33	36.94	26.76	1.31	0	0
666	FBtr0075151	protein_coding_gene	FBgn0000568	Eip75B	Ecdysone-induced protein 75B	CG8127	mRNA	FBtr0075151	Eip75B-RD		93.79	116.35	122.32	251.15	11.71	102.4	158.4	231.16	216.3	173	52.66	210.12	106.5	255.22	102.03	138.26	26.77	50.16	14.99	186.2	86.21	132.54	97.96	147.91	215.29	444.65	74.7	45.46	37.75	51.98	47.36	20.39	119.06	88.41	110.95	507.32	10.64	4.22	2.99
667	FBtr0306813	protein_coding_gene	FBgn0000568	Eip75B	Ecdysone-induced protein 75B	CG8127	mRNA	FBtr0306813	Eip75B-RE		21.25	24.48	30.91	32.79	60.48	45.37	35.33	26.48	27.29	46.13	6.83	18.99	124.05	143.77	93.74	82.5	35.46	22.2	38.28	64.91	14.15	51.54	36.96	82.19	81.05	110.9	27.14	32.3	28.8	55.12	27.91	23.32	28.57	203.63	36.58	198.24	1.28	2.36	4.26
668	FBtr0306814	protein_coding_gene	FBgn0000568	Eip75B	Ecdysone-induced protein 75B	CG8127	mRNA	FBtr0306814	Eip75B-RF		62.62	82.72	70.57	47.54	16.5	74.5	77.52	113.94	95.03	91.62	41.75	128.86	364.76	344.77	94.54	115.57	54.87	34.84	80.78	50.79	238.02	430.38	172.77	433.33	569.22	81.16	137.53	29.77	50.86	50.52	42.67	64.61	297.26	112.13	284.26	553	2.91	2.95	4.13
669	FBtr0347013	protein_coding_gene	FBgn0000568	Eip75B	Ecdysone-induced protein 75B	CG8127	mRNA	FBtr0347013	Eip75B-RG		0.37	0.7	0.77	1	0.45	0	0	2.24	0.57	0.17	0.12	0.06	5.68	13.3	3.87	2.57	0	0.22	0	0.53	0.22	0.84	0.18	2.17	0.33	0.4	3.81	0.78	0.22	0	4.02	0	1.29	0.09	3.44	29.95	0	0	0
670	FBtr0072578	protein_coding_gene	FBgn0000575	emc	extra macrochaetae	CG1007	mRNA	FBtr0072578	emc-RA		330.59	418.2	292.28	185.6	161.53	261.61	250.59	222.48	126.09	252.18	169.16	358.04	0.21	158.49	8.13	0.05	196.04	66.25	583.3	600.42	587.65	557.36	440.6	35.27	55.06	18.86	58.4	1.06	0	0.22	1.71	55.58	71.29	10.99	30.25	68.53	6.68	35.05	26.33
671	FBtr0082863	protein_coding_gene	FBgn0000576	ems	empty spiracles	CG2988	mRNA	FBtr0082863	ems-RA		0	0	0	0	0	0	0	0	0	0	0.03	0	0	0	0	0	0	0	0	0	0.35	0	0	0	0	0	0	0	0	0	0	0	0.08	0	0.05	0	0	0	0
672	FBtr0088095	protein_coding_gene	FBgn0000577	en	engrailed	CG9015	mRNA	FBtr0088095	en-RB		0	0	0	0	0	0	0	0	0	0	0	0	0	0	0	0	0	0	0	0	0	0	0	0	0	0	0	0	0	0	0	0	0	0	0	0	0	0	0
673	FBtr0088096	protein_coding_gene	FBgn0000577	en	engrailed	CG9015	mRNA	FBtr0088096	en-RA		0	0	4.09	0	0	0	0.05	0	0	0	0.03	0.82	0	0	0	0	0	0	0	0	0	0	0	0	0.06	0	0	0	0	0	0	0	0	0	0	0	0	0	0
674	FBtr0086582	protein_coding_gene	FBgn0000578	ena	enabled	CG15112	mRNA	FBtr0086582	ena-RC		15.36	18.32	12.61	2.49	1.86	8.24	9.82	10.55	2.45	12.02	5.23	12.85	6.69	0.47	36.29	7.76	0.59	6.03	22.14	46.39	36.82	8.61	12.27	22.48	33.15	17.69	36.48	14.58	34.41	35.33	64.73	32.34	11.91	2.46	16.39	81.95	0	3.24	0
675	FBtr0086583	protein_coding_gene	FBgn0000578	ena	enabled	CG15112	mRNA	FBtr0086583	ena-RA		0	0	0	0	0	0	0	0	0	0	0	0	0	0	0	0	20.09	0	0	0	0	0	0	0	0	0	0	0	0	0	0	0	0	0	0	0	2.28	2.95	0
676	FBtr0086584	protein_coding_gene	FBgn0000578	ena	enabled	CG15112	mRNA	FBtr0086584	ena-RB		3.22	2.28	2.09	0.78	0	0	0	0.38	0.06	1.72	1.12	0	0	0	2.98	0	0	0.84	0.27	0	5.65	0	2.9	0.51	0.27	0	0.08	0	0.17	1.07	7.36	4.06	2.64	17.07	0.64	0.36	0.23	2.2	0
677	FBtr0100174	protein_coding_gene	FBgn0000578	ena	enabled	CG15112	mRNA	FBtr0100174	ena-RD		0	0	0	17.13	0	0	0	0	0	0	0	0	0	0	0	6.65	0	0	0	0	0	0	0	0.09	0	0	0	0	0	0	0	0	0	16.82	0.05	3.69	0	0	0
678	FBtr0100176	protein_coding_gene	FBgn0000578	ena	enabled	CG15112	mRNA	FBtr0100176	ena-RE		0	0	0	0	0	0	0	0	0	0	0	0	0	0	0	0	0	0	0	0	0	0	0	0	0	0	0	0	0	0	0	0	0	0	0	0	0	1.02	1.48
679	FBtr0114623	protein_coding_gene	FBgn0000578	ena	enabled	CG15112	mRNA	FBtr0114623	ena-RF		3.65	1.07	1.7	0.09	0	2.01	1.38	5.22	0	2.06	0.76	4.52	34.77	28.8	1.32	0.17	0	0.91	1.23	0.15	3.2	1.87	1.44	0.32	0	0	2.07	0.76	1.37	5.06	0.36	1.5	0	14.55	5.37	27.49	0	0	0
680	FBtr0340450	protein_coding_gene	FBgn0000578	ena	enabled	CG15112	mRNA	FBtr0340450	ena-RG		1.58	6.24	12.93	1.34	0	1.61	0.11	3.5	1.86	5.69	3.46	3.2	166.45	0	3.08	10.77	3.54	14.42	14.51	1.79	25.67	4.93	12.77	9.4	2.05	0	24.57	5.33	1.48	8.07	3.95	16.22	26.21	1.53	28.12	2.14	4.35	0.86	5.64
681	FBtr0077905	protein_coding_gene	FBgn0000579	Eno	Enolase	CG17654	mRNA	FBtr0077905	Eno-RB		0	0	0	0	0	0	0	0	0	0	0	0	0	0	0	0	0	0	0	0	0	0	0	0	0	0	0	0	0	0	0	0	0	0	0	0	0	0	0
682	FBtr0077906	protein_coding_gene	FBgn0000579	Eno	Enolase	CG17654	mRNA	FBtr0077906	Eno-RE		8.24	16.59	6.21	13.41	5.43	25.74	26.7	7.07	2.59	5.23	49.94	12.5	17.38	0.91	2.18	16.96	53.2	14.9	74.7	23.84	34.17	61.06	28.31	22.35	32.37	3.54	23.22	16.27	5.38	10	23.58	35.57	46.19	12.66	19.88	0	151.09	193.64	223.5
683	FBtr0077907	protein_coding_gene	FBgn0000579	Eno	Enolase	CG17654	mRNA	FBtr0077907	Eno-RC		0	0	0.24	0	0	0	0	0.86	0	0	0.17	0	0	0	0	0	0	0	0	0	0	0	0	0	0	0	0	1.43	0	0	0	0	1.09	0	0	0	0.53	2.68	0
684	FBtr0077908	protein_coding_gene	FBgn0000579	Eno	Enolase	CG17654	mRNA	FBtr0077908	Eno-RD		0	0	0	0	0	0	0	0	0	0.25	0	0	0	0	0	0	0	0	0	0	0	0	0	3.77	0	0	0	0	0	0	0	0	0	0	0	0	0	0	0
685	FBtr0077909	protein_coding_gene	FBgn0000579	Eno	Enolase	CG17654	mRNA	FBtr0077909	Eno-RA		54.73	68.39	39.61	173.94	36.68	102.2	39.48	64.93	36.77	78.94	71.94	55.32	18.52	10.67	47.07	133.35	0	0.81	159.09	25.21	12.46	29.33	21.25	8.42	19.67	0	13.53	56.09	26.74	36.96	51.69	61.1	28.09	4.05	23.63	14.4	172.81	274.56	262.05
686	FBtr0302115	protein_coding_gene	FBgn0000579	Eno	Enolase	CG17654	mRNA	FBtr0302115	Eno-RF		12.61	10.55	12.71	0.94	0.92	7.65	15.4	27.44	5.76	12.77	0.74	0	0.13	0	15.67	0	0	5.28	0.09	0	6.69	0.77	0	1.69	0	0	5.01	11.34	0	32.35	2.42	0.09	0.09	15.99	1.85	0	0	0	0
687	FBtr0088139	protein_coding_gene	FBgn0000581	E(Pc)	Enhancer of Polycomb	CG7776	mRNA	FBtr0088139	E(Pc)-RA		9.11	30.18	33.95	10.21	0	1.82	35.54	55.97	0	11.48	0	13.63	0	0	4.96	13.41	0.66	0	0.55	0	0	8.11	0	0	0	0	21.29	0.67	0.12	2.34	2.9	3.98	0	12.03	23.14	32.01	0	0	0
688	FBtr0088140	protein_coding_gene	FBgn0000581	E(Pc)	Enhancer of Polycomb	CG7776	mRNA	FBtr0088140	E(Pc)-RB		69.8	61.59	43.57	18.34	228.46	91.07	28.98	43.97	29.23	50.96	1.4	33.65	7.98	39.11	81.61	44.4	2.28	41.79	0	0.15	9.19	22.22	2.7	7.91	25.26	92.7	4.93	48.14	46.88	64.75	68.5	11.43	0.9	44.48	0.44	116.86	0.04	0	0
689	FBtr0330621	protein_coding_gene	FBgn0000581	E(Pc)	Enhancer of Polycomb	CG7776	mRNA	FBtr0330621	E(Pc)-RC		13.48	12.28	19.48	2.64	3.92	20.81	13.42	7.71	11.23	15.63	1.65	12.32	23.93	42.75	12.25	8.31	17.63	4.43	13.3	28.82	12.76	16.1	3.77	13.26	20.77	6.38	8.18	8.23	29.76	1.96	0.82	0.59	41.25	0	1.23	8.18	0	0.33	0.14
690	FBtr0330622	protein_coding_gene	FBgn0000581	E(Pc)	Enhancer of Polycomb	CG7776	mRNA	FBtr0330622	E(Pc)-RD		3.88	5.97	5.33	0	0	0.4	18.58	8.32	3.92	1.56	16.26	8.68	80.59	0	0	2.45	0	0	0	0	26.29	10.55	40.36	44.68	13.87	0	16.74	0	6.34	0	0	18.9	26.33	0	0.26	0	0	0	0
691	FBtr0330623	protein_coding_gene	FBgn0000581	E(Pc)	Enhancer of Polycomb	CG7776	mRNA	FBtr0330623	E(Pc)-RE		0	0.97	0	15.63	31.47	0.72	0	0	0	0	1.58	0	0	11.22	4.7	0	0	0	0	39.28	5.28	0	0	47.55	0.1	0	0	3.6	0	4.65	8.68	3.99	6.26	11.82	29.03	2.18	0.56	0	0
692	FBtr0080325	protein_coding_gene	FBgn0000588	esc	extra sexcombs	CG14941	mRNA	FBtr0080325	esc-RA		123.11	100.59	115.28	78.46	104.48	61.45	41.78	129.3	106.6	18.6	2.69	22.9	103.26	251.07	252.82	335.09	22.89	4.58	4.33	0	41.17	0.85	27.93	10.27	23.39	4.51	20.63	140.28	44.53	100.63	25.94	55.36	18.98	83.94	60.27	4.07	0	0	0
693	FBtr0084961	protein_coding_gene	FBgn0000591	E(spl)m8-HLH	Enhancer of split m8, helix-loop-helix	CG8365	mRNA	FBtr0084961	E(spl)m8-HLH-RA		0	0	0	0	0	0	0	0	0	0	0	0	0	0	0	0	0	0	0	0	0	0	0	0	0	0	0	0	0	0	0	0	0	0	0	0	0	0	0
694	FBtr0076003	protein_coding_gene	FBgn0000592	Est-6	Esterase 6	CG6917	mRNA	FBtr0076003	Est-6-RA		0	0	0	0	0	0	0	0.09	0	0	0	0	0	0	0.08	0	0	0	0	0	0.3	0	0	0	0	0	0	0	0	0	0	0	0	0	0	0	0	0	0
695	FBtr0333383	protein_coding_gene	FBgn0000592	Est-6	Esterase 6	CG6917	mRNA	FBtr0333383	Est-6-RB		0	0	0.07	0	0	0	0	0	0	0	0.21	0	0	0	0	0	0	0	0	0	0	0	0	0	0	0	0	0	0	0	0	0	0	0.11	0	0	0	0	0
696	FBtr0076004	protein_coding_gene	FBgn0000594	Est-P	Esterase P	CG17148	mRNA	FBtr0076004	Est-P-RA		3.02	2.3	2.19	6.74	0.06	0	4.16	0.94	0.06	1.01	0	0.46	0	0	4.91	0	0	10.11	30.46	0	2.12	0	0	0.19	0	0	2.51	0.15	0	0.68	0	10.91	0	0	6.04	0	0	0	0
697	FBtr0088390	protein_coding_gene	FBgn0000606	eve	even skipped	CG2328	mRNA	FBtr0088390	eve-RA		0	0.08	0.7	0	0	0	0	0	0	0.09	0	0	0	0	0.1	0	0	0.07	0	0	0	0.15	0	0	0	0	0	0	0.27	0	0	0	0	0	0.11	0	0	0	0
698	FBtr0074135	protein_coding_gene	FBgn0000611	exd	extradenticle	CG8933	mRNA	FBtr0074135	exd-RA		3.53	8.45	5.73	38.57	0	0	0	19.4	33.73	40.69	5.62	0	0	0.84	10.34	12.64	2.34	14.72	0.07	1.03	6.61	25.36	0	7.21	0	7.2	3.05	6.14	24.05	0.94	23.5	36.14	33.08	1.07	3.02	0.52	1.32	0	5.58
699	FBtr0074137	protein_coding_gene	FBgn0000611	exd	extradenticle	CG8933	mRNA	FBtr0074137	exd-RB		0.33	0	0	0	0	0	0	0	0	0	0.12	0	0	0	0	0	0	0	0	0	0	0	0	0	0	0	0	0	0	0	0	0	0	0	0	0	0	0	0
700	FBtr0333322	protein_coding_gene	FBgn0000611	exd	extradenticle	CG8933	mRNA	FBtr0333322	exd-RD		1.76	2.15	2.36	0	0	0	10.23	5.21	0	12.11	21.32	0	43.58	1.68	0	0	0	0	0	0	91.81	0	4.17	40.28	0	0	46.21	2.31	0	0	0	16.12	155.42	0	11	0	0	0	6.2
701	FBtr0333323	protein_coding_gene	FBgn0000611	exd	extradenticle	CG8933	mRNA	FBtr0333323	exd-RE		26.28	36.21	32.23	19.01	16.73	14.19	7.3	28.52	8.17	4.03	1.19	113.24	32.16	18.66	46.51	12.12	26.12	10.42	26.43	47.08	3.49	72.02	35.43	33.61	53.64	24.28	0.01	28.35	6.4	26.76	8.98	0	5.17	59.48	55.55	131.82	9.3	5.75	1.38
702	FBtr0086242	protein_coding_gene	FBgn0000615	exu	exuperantia	CG8994	mRNA	FBtr0086242	exu-RA		0	0	0	0	0	0	0	0	0	0	0	0	0	0	0	0	0	0	0	0	0	0	0	0	0	0	0	0	0	0	0	0	0	0	0	0	0	0	0
703	FBtr0086243	protein_coding_gene	FBgn0000615	exu	exuperantia	CG8994	mRNA	FBtr0086243	exu-RB		0	0	0	0	0	0	0	0	0	0	0	0	0	0	0	0.81	0	0	0	0	0	0	0	0	0	0	0	0	0	0	0.11	0	0	0	0	0	0	0	0
704	FBtr0086244	protein_coding_gene	FBgn0000615	exu	exuperantia	CG8994	mRNA	FBtr0086244	exu-RC		0	0	0	0	0	0	0	0	0	0	0	0	0	0	0	0	0	0	0	0	0	0	0	0	0	0	0	0	0	0	0	0.96	0	0	0	0	0	0	0
705	FBtr0302285	protein_coding_gene	FBgn0000615	exu	exuperantia	CG8994	mRNA	FBtr0302285	exu-RD		0	0	0	0	0	0	0	0	0	0	0	0	0	0	0	0	0	0	0	0	0	0	0	0	0	0	0	0	0	0	0	0	0	0	0	0	0	0	0
706	FBtr0074463	protein_coding_gene	FBgn0000617	e(y)1	enhancer of yellow 1	CG6474	mRNA	FBtr0074463	e(y)1-RA		4.66	11.02	0.23	1.71	0	0.08	0.11	0.7	17.23	1.06	3.13	0	0	0	4.48	2.83	0.13	0	0	19.84	7.52	2.92	0	0	0	5.83	2.09	3.89	0	2.07	2.91	9.98	0	0.18	11.43	0	0	0.35	0.32
707	FBtr0073540	protein_coding_gene	FBgn0000618	e(y)2	enhancer of yellow 2	CG15191	mRNA	FBtr0073540	e(y)2-RA		5.83	1.17	0.32	0.53	0	0	0	0.77	0	0.33	0	0	0	0	0	0	0	17.88	0	0	0	0	0	0	0	34.7	0	0	0	0.3	0	0	0	0	0	0	24.78	0	50.03
708	FBtr0075979	protein_coding_gene	FBgn0000625	eyg	eyegone	CG10488	mRNA	FBtr0075979	eyg-RA		0	0	0	0	0	0	0	0	0	0	0	0	0	0	0	0	0	0.13	0	0	0	0	0	0	0	0	0	0	0	0	0	0	0	0	0	0	0	0	0
709	FBtr0100170	protein_coding_gene	FBgn0000625	eyg	eyegone	CG10488	mRNA	FBtr0100170	eyg-RB		0	0	0	0	0	0	0	0	0	0	0	0	0	0	0	0	0	0	0	0	0	0	0	0	0	0	0	0.05	0	0	0	0	0	0	0	0	0	0	0
710	FBtr0339921	protein_coding_gene	FBgn0000625	eyg	eyegone	CG10488	mRNA	FBtr0339921	eyg-RC		0	0	0	0	0	0	0	0	0	0	0	0	0	0	0	0	0	0	0	0	0	0	0	0	0	0	0	0	0	0	0	0	0	0	0	0	0	0	0
711	FBtr0076279	protein_coding_gene	FBgn0000629	E(z)	Enhancer of zeste	CG6502	mRNA	FBtr0076279	E(z)-RA		0	0	0	0	0	0	0	0	0	0	1.34	0	0	0	0	0	0	0	0	0	0	0	0	0	0	0	1.41	0	0	0	0	2.34	0	0	1.74	0	0	0	0
712	FBtr0273338	protein_coding_gene	FBgn0000629	E(z)	Enhancer of zeste	CG6502	mRNA	FBtr0273338	E(z)-RB		0.13	5.03	0	50.37	20.3	0	1.44	9.82	0	8.83	0	1.59	25.74	0.09	13.73	0	0	3.9	0	0.11	2.5	2.34	3.77	8.02	0	0	2.66	7.43	0.45	30.94	5.62	29.66	20.64	0	7.79	0	6.29	0	1.27
713	FBtr0334067	protein_coding_gene	FBgn0000629	E(z)	Enhancer of zeste	CG6502	mRNA	FBtr0334067	E(z)-RC		6.15	8.32	35.11	0	0	0	0	0	17.25	0	3.28	0	0	0	0	16.24	0	0	0	0	0	0	3.57	0	0	0	0	1.8	0	0	0	0	0	0	0	0	0	0	0
714	FBtr0087625	protein_coding_gene	FBgn0000633	CG17716		CG17716	mRNA	FBtr0087625	CG17716-RA		0	0	0	0	0	0	0	0	0	0	0	0	3.08	3.99	0	0	0	0	0	0	0	0	0	0	0	0	46.1	1.15	0	0	0	0	0	0	0	4.34	0	0	0
715	FBtr0339940	protein_coding_gene	FBgn0000633	CG17716		CG17716	mRNA	FBtr0339940	CG17716-RB		0.62	0.55	0.56	4.77	14.13	2.95	7.36	1.91	0.03	3.83	16.03	241.67	350.92	482.44	152.43	154.35	7.27	7.41	10.66	18.31	16.08	2.57	55.18	33.33	65.99	43.18	20.44	111.02	138.98	27.24	29.12	15.4	15.62	27.53	128.87	233.97	8.31	6.82	7.33
716	FBtr0070665	protein_coding_gene	FBgn0000635	Fas2	Fasciclin 2	CG3665	mRNA	FBtr0070665	Fas2-RA		1.1	0	0.55	0	0	0	0	0.79	0	0.17	1.32	0	0	0	0	4.44	1.32	0.1	0	0	1.64	11.58	0.78	0.91	4.48	0	0.33	5.16	0.94	7.75	1.72	1.82	0.4	0	0	0	0	0	2.19
717	FBtr0070666	protein_coding_gene	FBgn0000635	Fas2	Fasciclin 2	CG3665	mRNA	FBtr0070666	Fas2-RB		9.97	9.09	18.55	0.08	1.09	0.4	0.65	25.42	2.27	13.02	1.1	20.4	0	0.16	1.83	0	0.14	1.11	0	8.65	13.29	80.26	10.57	13.32	57.62	4.56	6.35	76.81	35.04	8.1	18.02	18.2	4.69	12.68	40.44	3.66	0	0	0
718	FBtr0070667	protein_coding_gene	FBgn0000635	Fas2	Fasciclin 2	CG3665	mRNA	FBtr0070667	Fas2-RC		52.58	58.09	84.76	10.99	0	9.91	6.93	76.52	50.44	62.33	4.23	220.11	0.14	1.33	0	0	25.61	4.57	56.23	40.4	43.26	156.11	28.63	92.46	133.81	188.66	32.32	33.52	19.56	18.62	57.21	9.15	20.43	38.24	6.55	6.28	0	0	0.62
719	FBtr0336882	protein_coding_gene	FBgn0000635	Fas2	Fasciclin 2	CG3665	mRNA	FBtr0336882	Fas2-RD		0	0	0	0.41	3.88	0	0	0	0	0	0	0	0	0	0	9.52	0	0	0	0	0	0	0	0	0	0	0	0	0	0	0	0	0	0	0	0	0	0	0
720	FBtr0336884	protein_coding_gene	FBgn0000635	Fas2	Fasciclin 2	CG3665	mRNA	FBtr0336884	Fas2-RF		68.55	73.66	79.78	18.68	5.24	15.94	29.78	98.36	49.16	77.86	11.6	233.48	0.23	4.38	0.44	0.37	13.65	22.51	57.24	34.98	106.78	828.74	145.5	178.24	352.76	122.37	49.21	20.88	11.99	83.1	92.98	42.08	140.22	66.35	117.82	21.74	0	0.07	3.32
721	FBtr0343523	protein_coding_gene	FBgn0000635	Fas2	Fasciclin 2	CG3665	mRNA	FBtr0343523	Fas2-RG		0	0	0	0	0	0	0	0.19	0.22	0.32	0.3	0	0	0	0	0	0.05	0	0	0	0.57	1.47	0.74	3.79	1.06	0	0.52	0.37	9.75	0	0	0	0.91	3.37	0.7	0	0	0	0.24
722	FBtr0343524	protein_coding_gene	FBgn0000635	Fas2	Fasciclin 2	CG3665	mRNA	FBtr0343524	Fas2-RH		7.99	2.8	7.74	3.24	0	1.75	0.73	9.86	1.44	7.19	0.45	3.65	0	0	0	0	2.37	0.56	0.05	0	0.48	34.47	4.92	38.28	4.4	23.19	6.74	11.38	0.4	2.43	8	4.34	0.47	53.33	3.41	69.86	0	0	1.91
723	FBtr0081051	protein_coding_gene	FBgn0000636	Fas3	Fasciclin 3	CG5803	mRNA	FBtr0081051	Fas3-RA		0	1.6	2.58	0.97	0	0	0	0.63	0	0	1.19	0	0	0	0	0	0	0	0	0	5.07	0	9.65	0	0	0	1.19	0.39	0	0	0	0	10.95	0	0	0	0	0	0
724	FBtr0081052	protein_coding_gene	FBgn0000636	Fas3	Fasciclin 3	CG5803	mRNA	FBtr0081052	Fas3-RB		0.18	0	0	0.26	0	0.76	0	0	0	0	1.44	0	13.8	0	0	0	0	0	0	0	0	65.14	42.56	20.87	0.64	0	10.92	2.73	0	0.6	0	5.95	25.19	0	0	0	1.19	0	0
725	FBtr0112804	protein_coding_gene	FBgn0000636	Fas3	Fasciclin 3	CG5803	mRNA	FBtr0112804	Fas3-RC		0	0	0.14	0	0	0	0	0	0	0	0.33	0	0	0	0	0	0	0.91	0	0	0	39.61	1.03	0	1.23	0	4.5	0	0.69	0	0.78	0	2.28	0	0	0	0	0	0
726	FBtr0112805	protein_coding_gene	FBgn0000636	Fas3	Fasciclin 3	CG5803	mRNA	FBtr0112805	Fas3-RD		1.09	0.11	0.65	0	0.39	0	0	0.14	0	0	2.34	0.1	0	4.35	0	0	0	0	0	0	3.19	22.55	8.85	3.25	0.32	0	8.81	1.17	0.07	0.78	1.46	0.56	17.66	0	4.09	0.57	0	0	0
727	FBtr0301391	protein_coding_gene	FBgn0000636	Fas3	Fasciclin 3	CG5803	mRNA	FBtr0301391	Fas3-RE		0	0	0	0	0	0	0	0	0	0	0	0	0	0	13.27	0	0	0	0	0	0	0	0	0	1.31	1.41	0	0	0	0.5	0	0	0	0	0	0	0	0	0
728	FBtr0340580	protein_coding_gene	FBgn0000636	Fas3	Fasciclin 3	CG5803	mRNA	FBtr0340580	Fas3-RF		3.67	2.99	3.81	1.58	2.77	0.49	15.66	14.12	0.38	0.15	2.13	0.28	30.26	0	0	0	0.06	0	8.48	3.97	0	6.89	0	0	0	0	0	2.64	22.04	1.15	6.07	0	0	5.15	5.06	535.16	0	0	0
729	FBtr0344782	protein_coding_gene	FBgn0000636	Fas3	Fasciclin 3	CG5803	mRNA	FBtr0344782	Fas3-RG		0	0	0	0	0	0	0	0	0	0	0	0	0	0	0	0	0	0	0	0	0	1.58	0	0	0	0	4.96	0	2.46	0	0	0	0	0	4.35	0	0	0	0
730	FBtr0075749	protein_coding_gene	FBgn0000639	Fbp1	Fat body protein 1	CG17285	mRNA	FBtr0075749	Fbp1-RA		0	0	0	0	0	0	0	0	0	0	0	0	0	0	0	0	0	0	0	0	0	0	0	0	0	0	0	0	0	0	0	0	0	0	0	0	0	0	0
731	FBtr0075750	protein_coding_gene	FBgn0000639	Fbp1	Fat body protein 1	CG17285	mRNA	FBtr0075750	Fbp1-RB		0	0	0	0	0	0	0	0	0	0	0	0	0	0	0	0	0	0	0	0	0	0	0	0	0	0	0	0	0	0	0	0	0	0	0	0	0	0	0
732	FBtr0339515	protein_coding_gene	FBgn0000639	Fbp1	Fat body protein 1	CG17285	mRNA	FBtr0339515	Fbp1-RD		0	0	0	0	0	0	0	0	0	0	0	0	0	0	0	0	0	0	0	0	0.35	0	0.42	0	0.24	0	5.67	0	0	0	0	0	0	9.98	0	0	0	0	0
733	FBtr0079808	protein_coding_gene	FBgn0000640	Fbp2	Fat body protein 2	CG3763	mRNA	FBtr0079808	Fbp2-RA		0	0	0	0	0	0	0	0	0	0	0	0	0	0	0	0	0	0	0	0	0	0	0	0	0	0	0	0	0	0	0	0	0	0	0	0	0	0	0
734	FBtr0343428	protein_coding_gene	FBgn0000640	Fbp2	Fat body protein 2	CG3763	mRNA	FBtr0343428	Fbp2-RB		0	0	0	0	0	0	0	0	0	0	0	0	0	0	0	0	0	0	0	0	0	0	0	0	0	0	0	0	0	0	0	0	0	0	0	0	0	0	0
735	FBtr0343429	protein_coding_gene	FBgn0000640	Fbp2	Fat body protein 2	CG3763	mRNA	FBtr0343429	Fbp2-RC		0	0	0	0	0	0	0	0	0	0	0	0	0	0	0	0	0	0	0	0	0	0	0.2	0	0	0	0	0	0	0	0	0	0	0	0	0	0	0	0
736	FBtr0070542	protein_coding_gene	FBgn0000644	Fcp3C	Follicle cell protein 3C	CG4015	mRNA	FBtr0070542	Fcp3C-RA		0	0	0.41	0	0	0	0	0	0	0	0	0	0	0	0	0	0	0	0	0	0	0	0	0	0	0	0	0	0	0	0	0	0	0	0	0	0	0	0
737	FBtr0086754	protein_coding_gene	FBgn0000658	fj	four-jointed	CG10917	mRNA	FBtr0086754	fj-RA		0	0	0	0	0	0	0	0	0	0	0.29	0	0	0	0	0	0	0	0	0	0	0	0	0	0	0	0	0	0	0	0	0	0	0	0	0	0	0	0
738	FBtr0085321	protein_coding_gene	FBgn0000659	fkh	fork head	CG10002	mRNA	FBtr0085321	fkh-RA		0	0	0	0	0	0	0	0	0	0.04	0	0	0	19.87	0	0	0.04	4.11	0	0	0	0	0	0	0	1.57	0	0.87	0	0	0	0	0	0	0	0	0	0	0
739	FBtr0300259	protein_coding_gene	FBgn0000659	fkh	fork head	CG10002	mRNA	FBtr0300259	fkh-RB		0	0	0	0	0	0	0	0	0	0	0.24	2.2	0	0.36	0	0	0	0.22	0	1.13	0	0.01	0	0	0.16	0	0	0	0	0	0	1.94	0.01	0.02	0	9.1	0	0	0
740	FBtr0330333	protein_coding_gene	FBgn0000659	fkh	fork head	CG10002	mRNA	FBtr0330333	fkh-RC		0	0	0	0	0	0	0	0	0	0	0.24	2.2	0	0.36	0	0	0	0.22	0	1.13	0	0.01	0	0	0.16	0	0	0	0	0	0	1.94	0.01	0.02	0	9.1	0	0	0
741	FBtr0345227	protein_coding_gene	FBgn0000659	fkh	fork head	CG10002	mRNA	FBtr0345227	fkh-RD		0	0	0	0	0	0	0	0	0	0	8.38	0	0	0	0	0	0	0	0	0	4.99	0	20.88	0.78	0	0	3.52	0	0	0	0	4.3	0	0	1.36	2.52	0	0	0.07
742	FBtr0346765	protein_coding_gene	FBgn0000659	fkh	fork head	CG10002	mRNA	FBtr0346765	fkh-RE		0	0	0	0	0	0	0	0	0	0	0.24	2.2	0	0.36	0	0	0	0.22	0	1.13	0	0.01	0	0	0.16	0	0	0	0	0	0	1.94	0.01	0.02	0	9.1	0	0	0
743	FBtr0087647	protein_coding_gene	FBgn0000662	fl(2)d	female lethal d	CG6315	mRNA	FBtr0087647	fl(2)d-RA		75.59	101.42	115.46	56.07	101.5	90.26	20.45	90.11	87.24	92.29	22.09	163.01	311.2	150.2	76.98	67.7	10.62	11.98	26.45	73.03	46.13	86.17	65.43	167.63	36.09	91.12	46.01	68.31	24.58	55.44	91.68	54.46	54.62	151.01	57.63	121.39	0	1.77	3.7
744	FBtr0087648	protein_coding_gene	FBgn0000662	fl(2)d	female lethal d	CG6315	mRNA	FBtr0087648	fl(2)d-RB		0	0	0	6.75	0.13	0	0	0	0	0	0.11	1.05	0	0	0	0	0	0	0	0	0	0	0	0	0	0	0	0	0	0	15	0	0	0	0	0	0	0.22	0
745	FBtr0304696	protein_coding_gene	FBgn0000662	fl(2)d	female lethal d	CG6315	mRNA	FBtr0304696	fl(2)d-RC		0	0	0	0	0	0	19.64	0	0	0	0	0	0	0	0	0	0	0	0	0	0	0.01	0	0	0	0.78	0	0	0	0	0	0	0	0	6.07	0	0	0	0
746	FBtr0304697	protein_coding_gene	FBgn0000662	fl(2)d	female lethal d	CG6315	mRNA	FBtr0304697	fl(2)d-RD		3.41	3.68	3.59	2.56	0	0	2.4	14.51	5.77	3.66	2.25	0	49.92	33.73	9.01	0	8.8	0.38	0	0	14.52	1.63	1.74	0.11	67.83	0	5.94	2.07	0	2.77	1.66	1.84	38.87	0	10.42	0	1.68	0	1.59
747	FBtr0070343	protein_coding_gene	FBgn0000667	Actn	α actinin	CG4376	mRNA	FBtr0070343	Actn-RB		0	0.9	0	0	0	0	0	0	0	0	0	0	0	0	0	0	0	0	0	0	0	0	0	0	0	0	0	0	0	4.84	0	0	0	0	0	0	0	0	0
748	FBtr0070344	protein_coding_gene	FBgn0000667	Actn	α actinin	CG4376	mRNA	FBtr0070344	Actn-RA		5.02	0	2.85	0	0	0	0	0	0	0	0	0	0	0	5.8	0	0	0	0	0	0.05	0	0	0	0	0	0	3.28	0	4.84	15.97	0.45	1.42	0	0	0	0	0	0
749	FBtr0070345	protein_coding_gene	FBgn0000667	Actn	α actinin	CG4376	mRNA	FBtr0070345	Actn-RC		11.2	14.49	8.16	11.96	9.9	0.2	10.49	2.61	2.46	4.24	5.05	15.96	21.86	10.33	8.16	15.6	1.74	9.57	2.91	10.52	20.26	23	18.5	20.58	8.96	2.33	26.06	6.9	0	3.1	4.05	13.99	24.27	8.81	22.85	178.06	5.27	2.31	3.31
750	FBtr0303048	protein_coding_gene	FBgn0000667	Actn	α actinin	CG4376	mRNA	FBtr0303048	Actn-RD		0	0	0.3	0	0	0	0	0	0	0	0	0	0	0	0	0	1.9	8.51	0	0	0	0	0	0	0	0	0	0	6.14	0	0	0	0	0	0	0	0	0	0
751	FBtr0310657	protein_coding_gene	FBgn0000667	Actn	α actinin	CG4376	mRNA	FBtr0310657	Actn-RF		0	0.37	0	1.25	0	0	0	0	0.25	0	0.17	1.82	0	0	0	0	0	0	0	0.24	0	0	0.16	0	0	0	0	0	1.17	0	3.11	0.23	0	4.28	0.06	0	0	0	0
752	FBtr0310658	protein_coding_gene	FBgn0000667	Actn	α actinin	CG4376	mRNA	FBtr0310658	Actn-RG		0	0	0	0	0	0	0	0	0	0	0	0	0	0	0	0	0	0	0	0	0	0	0	0	0	0	0	0	0	0	0	0	0	0	0	0	0	0	0
753	FBtr0310659	protein_coding_gene	FBgn0000667	Actn	α actinin	CG4376	mRNA	FBtr0310659	Actn-RH		0	0	0	0	0	0	0	0	0	0	0	0	0	0	0	0	0	0	0	0	0	0	0	0	0	0	0	0	0	0	0	0	0	0	0	0	0	0	0
754	FBtr0333801	protein_coding_gene	FBgn0000667	Actn	α actinin	CG4376	mRNA	FBtr0333801	Actn-RI		0.55	0.2	0	0	0	0	0	1.24	0.03	1.7	0	0	0	0	0	0.74	0	0	0	0	0.05	0	0	0	0	7.57	0	0	0	0	0	0.18	0	0	0	0.25	0	0	0
755	FBtr0333802	protein_coding_gene	FBgn0000667	Actn	α actinin	CG4376	mRNA	FBtr0333802	Actn-RJ		0	0	0	0	0	0	0	0	0	0	0	0	0	0	0	0	0	0	0	0	0	0	0	0	0	0	0	0	0	0	0	0	0	0	0	0	0	0	0
756	FBtr0077192	protein_coding_gene	FBgn0000709	fliI	flightless I	CG1484	mRNA	FBtr0077192	fliI-RA		19.52	22.3	19.66	12.19	0.16	1.42	13.07	21.71	5.33	7.04	3.75	1.79	2.74	9.83	14.43	30.31	0.91	6.86	0.36	0.11	3.09	3.71	4.21	20.67	0.79	16.73	13.29	21.65	7.48	24.71	7.28	2.74	9.73	0.12	10.99	0.19	3.11	1.06	0.12
757	FBtr0071446	protein_coding_gene	FBgn0000711	flw	flapwing	CG2096	mRNA	FBtr0071446	flw-RA		28.56	15.64	39.57	25.15	0.57	17.16	54.07	56.53	16.29	46.24	8.79	0	0	0	2.48	17.42	6.57	37.49	0	3.58	6.13	4.31	48.1	5.18	24.69	0	19.74	44.78	24.08	0.54	35.77	12.37	44.62	4.01	8.92	101.1	0	0	0.74
758	FBtr0071447	protein_coding_gene	FBgn0000711	flw	flapwing	CG2096	mRNA	FBtr0071447	flw-RB		17.82	22.67	0	9.27	0	23.51	0	0	6.9	24.17	8.23	34.24	41.34	0	0.33	0	26.64	0	52.29	0	10.53	0	0	0	0	0	0	0	0	7.23	0.03	0	0	0	19.71	0	32.98	10.79	12.12
759	FBtr0333305	protein_coding_gene	FBgn0000711	flw	flapwing	CG2096	mRNA	FBtr0333305	flw-RC		18.77	21.96	27.99	6.38	3.77	22.13	11.34	20.8	15.71	19.67	27.74	69.13	30.03	89.23	28.74	4.17	4.58	11.78	11.82	62.45	65.09	45.8	50.25	26.88	0.69	9.47	20.06	13.07	13.43	3.52	0.67	25.5	46.93	53.35	58.88	15.69	28.64	32.79	22.27
760	FBtr0474146	protein_coding_gene	FBgn0000711	flw	flapwing	CG2096	mRNA	FBtr0474146	flw-RD		17.82	22.67	0	9.27	0	23.51	0	0	6.9	24.17	8.23	34.24	41.34	0	0.33	0	26.64	0	52.29	0	10.53	0	0	0	0	0	0	0	0	7.23	0.03	0	0	0	19.71	0	32.98	10.79	12.12
761	FBtr0088383	protein_coding_gene	FBgn0000715	FMRFa	FMRFamide	CG2346	mRNA	FBtr0088383	FMRFa-RA		0.56	6.62	1.13	0	0	0	0	6.79	28.22	6.27	0.19	0	0	0	25.36	0	0	0	0.56	0	0	0	0	0	0	0	6.12	0	0	0	0	0	1.95	0	0	0	0	0	0
762	FBtr0077342	protein_coding_gene	FBgn0000719	fog	folded gastrulation	CG9559	mRNA	FBtr0077342	fog-RA		0	0.42	0	0	0.5	0	0	0	0	0	2.73	0	0	0	0	0	0	0	0	0	0	1.24	8.21	0	0	0	0	0	0	0	0	0	0.96	0	0	0	0	0	0
763	FBtr0100538	protein_coding_gene	FBgn0000719	fog	folded gastrulation	CG9559	mRNA	FBtr0100538	fog-RB		0	0	0	0	0	0	0	0	0	0	7.41	0.95	0	0	0	0	0	0	0	0	0	0	1.18	0	0	0	0	0	0	0	0	6.31	0.07	0	0	0	0	0	0
764	FBtr0333179	protein_coding_gene	FBgn0000719	fog	folded gastrulation	CG9559	mRNA	FBtr0333179	fog-RC		3.87	1.31	0.66	1.56	0	0	1.19	1.44	0	0.18	5	0.51	0	0	0.14	4.07	1.22	2.41	6.06	0.46	2.24	0	7.31	1.73	0.09	0	2.49	1.89	1.82	0	0	6.05	1.27	0	1.25	0	0	0	0
765	FBtr0333180	protein_coding_gene	FBgn0000719	fog	folded gastrulation	CG9559	mRNA	FBtr0333180	fog-RD		0	0	1.53	0.1	0	0	19.84	1.01	0	0	0	0	0	2.24	0	0	0	0	0	0	0	0	0	0	0.3	2.43	0	0	0.04	0	0.03	9.06	0	0	0	1.8	0	0	1.4
766	FBtr0333181	protein_coding_gene	FBgn0000719	fog	folded gastrulation	CG9559	mRNA	FBtr0333181	fog-RE		0	0	0.75	0	0	0	0	0	0.16	0	2.53	0	0	0	0	0.53	0	0	0	0	0	0	0	0	0	0	7.25	0	0	0.03	0	0	0	0	0	0	0	0.34	1.38
767	FBtr0333182	protein_coding_gene	FBgn0000719	fog	folded gastrulation	CG9559	mRNA	FBtr0333182	fog-RF		1.04	1	0	0.63	0	0.29	1.01	0.39	0	3.39	1.06	0	0	0	0	0	0	0	0	0.43	2.71	0.85	0.96	0.03	0.94	0	0.05	4.92	0.14	0	0	0.83	0	0	0.98	0	0.86	0	0.56
768	FBtr0089304	protein_coding_gene	FBgn0000721	for	foraging	CG10033	mRNA	FBtr0089304	for-RA		0	0	0	0	0	0	0	0	0	0	5.64	0	0	0	0	0	0	0	0	0	0	0	0	0	0	0	0	0	0	0	0	0	0	0	0	0	0	0	0
769	FBtr0089306	protein_coding_gene	FBgn0000721	for	foraging	CG10033	mRNA	FBtr0089306	for-RE		0	0	0	0	0	0	0	0	0	0	0	0	0	0	0	0	0	0	0	0	0	0	0	0	0	0	0	0	0	0	0	0	0	0	0	0	0	0	0
770	FBtr0089307	protein_coding_gene	FBgn0000721	for	foraging	CG10033	mRNA	FBtr0089307	for-RC		0	0	0	0	0	0	0	0	0	0	0	0	0	0	0	0	0	0	0	0	0	0	0	0	0	0	0	0	0	0	0	0	0	0	0	0	0	0	0
771	FBtr0089308	protein_coding_gene	FBgn0000721	for	foraging	CG10033	mRNA	FBtr0089308	for-RD		0	0	0	0	0	0	0	0	0	0	0.12	0	0	0	0	0	0	0	0	0	0	0	0	0	0	0	0	0	0	0	0	0	0	0	0	0	0	0	0
772	FBtr0089309	protein_coding_gene	FBgn0000721	for	foraging	CG10033	mRNA	FBtr0089309	for-RG		0	0	0	0	0	0	0	0	0	0	0	0	0	0	0	0	0	0	0	0	0	0	0	0	0	0	0	0	0	0	0	0	0	0	0	0	0	0	0
773	FBtr0089310	protein_coding_gene	FBgn0000721	for	foraging	CG10033	mRNA	FBtr0089310	for-RH		0	0	0	0	0	0	0	0	0	0	0	0	0	0	0	0	0	0	0	0	0	0	0.31	0	0	0	0.21	0	0	0	0	0.77	0	0	0	0	0	0	0
774	FBtr0089312	protein_coding_gene	FBgn0000721	for	foraging	CG10033	mRNA	FBtr0089312	for-RI		0	0	0	0	0	0	0	0	0	0	0	0	0	0	0	0	0	0	0	0	0	0	0	0	0	0	0	0	0	0	0	0.32	0	0	0	0	0	0	0
775	FBtr0100363	protein_coding_gene	FBgn0000721	for	foraging	CG10033	mRNA	FBtr0100363	for-RJ		0	0	0	0	0	0	0	0	0	0	0	0	0	0	0	0	0	0	0	0	0	0	0	0	0	0	0	0	0	0	0	0	0	0	0	0	0	0	0
776	FBtr0301399	protein_coding_gene	FBgn0000721	for	foraging	CG10033	mRNA	FBtr0301399	for-RK		0	0	0	0	0	0	0	0	0	0	0	0	0	0	0	0	0	0	0	0	0	0	0	0	0	0	0	0	0	0	0	0	0	0	0	0	0	0	0
777	FBtr0446099	protein_coding_gene	FBgn0000721	for	foraging	CG10033	mRNA	FBtr0446099	for-RL		0	0	0	0	0	0	0	0	0	0	0	0	0	0	0	0	0	0	0	0	0	0	0.03	0	0	0	0	0	0	0	0	0	0	0	0	0	0	0	0
778	FBtr0473363	protein_coding_gene	FBgn0000721	for	foraging	CG10033	mRNA	FBtr0473363	for-RM		0	0	0	0	0	0	0	0	0	0	0	0	0	0	0	0.44	0	0	0	0	0	0	0	0	0	0	0	0	0	0	0	0	0	0	0	0	0	0	0
779	FBtr0473364	protein_coding_gene	FBgn0000721	for	foraging	CG10033	mRNA	FBtr0473364	for-RN		0	0	0	0	0	0	0	0	0	0	0.15	0	0	0	0	0	0	0	0	0	0	0	0	0	0	0	0	0	0	0	0	0	0	0	0	0	0	0	0
780	FBtr0473365	protein_coding_gene	FBgn0000721	for	foraging	CG10033	mRNA	FBtr0473365	for-RO		0	0	0	0	0	0	0	0	0	0	0	0	0	0	0	0	0	0.14	0	0	0	0	1.04	0	0	0	0.33	0	0	2.43	0	6.28	3.06	0	2	0	0	0	0
781	FBtr0082051	protein_coding_gene	FBgn0000723	FER	FER tyrosine kinase	CG8874	mRNA	FBtr0082051	FER-RB		0	0	0	0	0	0	0	0	0	0	0	0	0	0	0	0	0.43	0	0	0	0	0	0	0	0	6.52	0	0	0	0	0	0	0	0	0	0	0	0	0
782	FBtr0082052	protein_coding_gene	FBgn0000723	FER	FER tyrosine kinase	CG8874	mRNA	FBtr0082052	FER-RA		2.91	2.37	2.44	9.04	0	3.41	0	0.19	1.01	0.08	1.36	0	0	0	0	0	0.08	0	0	0	1.63	0.38	1.95	17.39	0	0.12	8.23	0.2	0	0	0	2.84	10.55	0	5.05	1.73	0	0	0
783	FBtr0082053	protein_coding_gene	FBgn0000723	FER	FER tyrosine kinase	CG8874	mRNA	FBtr0082053	FER-RC		0	0	0	0	0	0	0.51	0	0	0	0	0	0	1.15	0	0	0	0	0	0	0	0	0.03	0.1	0	0	0.11	0	0	0	0	0	0.37	0	0	0	0	0	0
784	FBtr0082054	protein_coding_gene	FBgn0000723	FER	FER tyrosine kinase	CG8874	mRNA	FBtr0082054	FER-RD		0	0	0	0	0	0	0	0	0	0	0	0	0	0	0	0	0	0	0	0	0	0	0	0	0	0	0	0	0	0	0	0	0	0	0	0	0	0	0
785	FBtr0333295	protein_coding_gene	FBgn0000723	FER	FER tyrosine kinase	CG8874	mRNA	FBtr0333295	FER-RE		0	0	0	0	0	0	0	0	0	0	0	0	0	0	0	0	0	0	0	0	0	0	0	0	0	0	0	0	0	0	0	0	0	0	0	0	0	0	0
786	FBtr0333296	protein_coding_gene	FBgn0000723	FER	FER tyrosine kinase	CG8874	mRNA	FBtr0333296	FER-RF		0	0	0	0	0	0	0	0	0	0	0.25	0	0	0	0	0	0	0	0	0	0	0	0	0	0	0	0	0	0	0	0	0.09	0	0	0	0	0	0	0
787	FBtr0479757	protein_coding_gene	FBgn0000723	FER	FER tyrosine kinase	CG8874	mRNA	FBtr0479757	FER-RG		0.41	5.09	1.34	0	34.63	0	0	0.8	0	1.07	0.97	26.26	0	0	4.55	0	0	0.04	0.5	0	2.19	0.48	0	0.6	0	13.37	13.27	0	0	0	0	0	16.88	0.56	1.09	0	0	1.49	0.77
788	FBtr0332308	protein_coding_gene	FBgn0000808	gd	gastrulation-defective	CG1505	mRNA	FBtr0332308	gd-RC		0	0	0	0	0	0	0	0	0	0	0	0	0	0	0	0	0	0	0	0	0	0	0	0	0	0	0	0	0	0	0	0	0	0	0	0	0	0	0
789	FBtr0332309	protein_coding_gene	FBgn0000808	gd	gastrulation-defective	CG1505	mRNA	FBtr0332309	gd-RD		0	0	0	0	0	0	0	0	0	0	0	0	0	0	0	0	0	0	0	0	0	0	0	0	0	0	0	0	0	0	0	0	0	0	0	0	0	0	0
790	FBtr0332310	protein_coding_gene	FBgn0000808	gd	gastrulation-defective	CG1505	mRNA	FBtr0332310	gd-RE		0	0	0	0	0	0	0	0	0	0	0	0	0	0	0	0	0	0	0	0	0	0	0	0	0	0	0	0	0	0	0	0	0	0	0	0	0	0	0
791	FBtr0347416	protein_coding_gene	FBgn0000808	gd	gastrulation-defective	CG1505	mRNA	FBtr0347416	gd-RF		0	0	0	0	0	0	0	0	0	0	0	0	0	0	0	0	0	0	0	0	0	0	0	0	0	0	0	0	0	0	0	0	0	0	0	0	0	0	0
792	FBtr0070396	protein_coding_gene	FBgn0000810	fs(1)K10	female sterile (1) K10	CG3218	mRNA	FBtr0070396	fs(1)K10-RA		23.27	28.85	39.3	22.83	0.03	0.2	18.23	26.28	9.56	6.84	5.51	7.21	22.52	0.43	9.79	3.67	6.05	7.49	2.2	22.89	14.48	13.37	1.95	5.6	0.05	0.91	21.3	7.54	3.17	5.67	10.86	17.9	10.19	22.84	12.27	76.22	0	2.27	1.51
793	FBtr0070234	protein_coding_gene	FBgn0000826	png	pan gu	CG11420	mRNA	FBtr0070234	png-RA		0	0	0	0.1	0	0	0	0	0	1.54	0	0	0	0	0	0	0	0	0	0	0	0	0	0	0	0	0	0	0	0	0	0	0	0	0	0	0	0	0
794	FBtr0070485	protein_coding_gene	FBgn0000927	fs(1)Ya	female sterile (1) Young arrest	CG2707	mRNA	FBtr0070485	fs(1)Ya-RA		0	0	0	0	0	0	0	0	0	0	0	0	0	0	0	0	0	0	0	0	0	0	0	0	0	0	0	0	0	0	0	0	0	0	0	0	0	0.61	0
795	FBtr0070484	protein_coding_gene	FBgn0000928	fs(1)Yb	female sterile (1) Yb	CG2706	mRNA	FBtr0070484	fs(1)Yb-RA		0	0	0	0	0	0	0	0	0	0	0.02	0	0	0	0	0	0.12	0	0	0	0.08	0	0	0	0	0	0	0	0	0	0	0	0	0	0	0	0	0	0
796	FBtr0301669	protein_coding_gene	FBgn0000964	tj	traffic jam	CG10034	mRNA	FBtr0301669	tj-RB		0.03	0	0	0	0	0	0.02	0	0	0	1.51	0	0	0	0.02	0	0.02	2.95	0	0	0.13	0	8.47	0	0.06	0	0.39	0	0	0	0	0.67	4.79	0	0	0	0	0	0
797	FBtr0329891	protein_coding_gene	FBgn0000964	tj	traffic jam	CG10034	mRNA	FBtr0329891	tj-RC		0.03	0	0	0	0	0	0.02	0	0	0	1.51	0	0	0	0.02	0	0.02	2.95	0	0	0.13	0	8.47	0	0.06	0	0.39	0	0	0	0	0.67	4.79	0	0	0	0	0	0
798	FBtr0087387	protein_coding_gene	FBgn0000996	dup	double parked	CG8171	mRNA	FBtr0087387	dup-RA		0.26	0	2.06	0	0	0	1.64	0.75	0	0.31	0.43	0	0	0	0	0	0	0	0	0	0	0	0	0	0	0	0	0.32	0	0	0.13	0	0	0	0	0	1.14	0.43	0.1
799	FBtr0339999	protein_coding_gene	FBgn0000996	dup	double parked	CG8171	mRNA	FBtr0339999	dup-RB		4.01	2.18	0	1.44	0	0	0	2.4	0.15	0.17	0.72	0.58	0.22	0	0.29	0	0.1	0.09	0	0.1	1.57	0	3.55	2.26	0	0.07	1.05	0.67	0	0	0	0	0.03	0.07	0.76	0	0	0	0
800	FBtr0077478	protein_coding_gene	FBgn0001075	ft	fat	CG3352	mRNA	FBtr0077478	ft-RA		0	0.02	0	0	0	0.01	0	0	0	0.01	0	0.24	0	0	0	0	0	0.46	0	0	0	0	0.2	0	0	0	0	0	0	0.01	0	0	0.01	0	0.01	0	0	0	0
801	FBtr0081625	protein_coding_gene	FBgn0001077	ftz	fushi tarazu	CG2047	mRNA	FBtr0081625	ftz-RA		0	0	0	0	0	0	0	0	0	0	0	0	0	0	0	0	0	0	0	0	0	0	0	0	0	0	0	0	0	0	0	0	0	0	0	0	0	0	0
802	FBtr0075086	protein_coding_gene	FBgn0001078	ftz-f1	ftz transcription factor 1	CG4059	mRNA	FBtr0075086	ftz-f1-RB		34.36	26.83	33.13	35.79	0	0	0	16.64	56.53	0.95	6.05	0	4.12	0	32.64	67.91	0	30.81	21.7	0	0	1.69	3.76	23.07	0.27	0	2.12	57.25	0	21.17	28.06	6.13	17.61	0	31.96	0	0	0	0
803	FBtr0075087	protein_coding_gene	FBgn0001078	ftz-f1	ftz transcription factor 1	CG4059	mRNA	FBtr0075087	ftz-f1-RA		0	0	20.88	0	8.25	85.83	0	0	0	11.35	0	0	0	12.17	0	5.09	22.34	13.67	0	0	0	0	0	0	0	0	0	16.85	0	0	0	0	16.44	0	0	0	0	0	0
804	FBtr0304627	protein_coding_gene	FBgn0001078	ftz-f1	ftz transcription factor 1	CG4059	mRNA	FBtr0304627	ftz-f1-RC		17.77	15.92	20.09	0	0	9.14	30.22	79.92	9.52	16.86	18.34	2.94	104.22	73.8	0	4.18	1.4	15.44	39.9	56.47	32.09	27.05	57.7	62.29	74.9	0.99	21.9	6.35	5.3	0	4.37	9.48	82.2	16.78	33.58	46.55	2.8	2.94	2.55
805	FBtr0347045	protein_coding_gene	FBgn0001078	ftz-f1	ftz transcription factor 1	CG4059	mRNA	FBtr0347045	ftz-f1-RD		8.46	7.73	8.25	21.18	13.67	0	2.78	21.11	22.55	40.2	1.59	22.09	0	0	23.63	9.95	5.18	0.96	1.18	23.99	2.82	0	5.27	5.48	5.98	94.52	8.46	2.34	0.78	4.32	0	2.06	0.82	0	1.01	0	0	0	0
806	FBtr0074602	protein_coding_gene	FBgn0001079	fu	fused	CG6551	mRNA	FBtr0074602	fu-RA		8.57	9.77	6.57	17.81	0.32	0	0.61	4.11	18.18	4.47	1.96	0	0	0	11.72	1.74	0	1.98	0.5	0	0.04	5.7	1.25	15.85	0	0.49	4.16	1.52	4.13	11.91	3.15	1.96	0.11	1.28	3.8	0	0	0.2	1.13
807	FBtr0073580	protein_coding_gene	FBgn0001083	fw	furrowed	CG1500	mRNA	FBtr0073580	fw-RA		0	0.09	0	0	0	0	0	0	0	0	0	0	0	0	0	0	0	0	0	0	0	0	0	0	0	0	0	0	0	0	0	0	0	0	0	0	0	0	0
808	FBtr0112806	protein_coding_gene	FBgn0001083	fw	furrowed	CG1500	mRNA	FBtr0112806	fw-RB		0	0	0	0	0	0	0	0	0	0	0	0	0	0	0	0	0	0	0	0	0	0	0	0	0	0	0	0	0	0	0	0	0	0	0	0	0	0	0
809	FBtr0342733	protein_coding_gene	FBgn0001083	fw	furrowed	CG1500	mRNA	FBtr0342733	fw-RC		0	0	0	0	0	0	0	0	0	0	0	0	0	0	0	0	0	0	0	0.15	0	0	0	0	0	0	0	0	0	0	0	0	0	0	0	0	0	0	0
810	FBtr0079712	protein_coding_gene	FBgn0001084	fy	fuzzy	CG13396	mRNA	FBtr0079712	fy-RA		0	0	0	0	0	0	0	0	0	0	0	0	0	0	0	0	0	0	0	0	0	0	0	0	0	0	0	0	0	0	0	0	0	0	0	0	0	0	0
811	FBtr0331992	protein_coding_gene	FBgn0001084	fy	fuzzy	CG13396	mRNA	FBtr0331992	fy-RB		2.14	1.6	0.16	0	0	0.12	0.6	4.07	1.64	5.89	1.34	0	0	0	0	0	0	0	0	0	0	0	0	0	0	0	3.25	8.89	0	0	0	0	61.64	0	15.96	0	0	0	0.22
812	FBtr0075743	protein_coding_gene	FBgn0001085	fz	frizzled	CG17697	mRNA	FBtr0075743	fz-RA		31.25	41.53	25.27	34.45	4.71	43.01	44.06	33.79	16.52	24.92	1.99	0.54	0.14	1.86	1.49	0.34	0.03	0.2	0.02	0.02	2.81	2.81	1.2	33.74	23.45	27.38	7.12	17.19	7.44	12.72	7.63	2.22	12.01	50.48	21.93	3.84	0	0	0
813	FBtr0330102	protein_coding_gene	FBgn0001085	fz	frizzled	CG17697	mRNA	FBtr0330102	fz-RC		31.25	41.53	25.27	34.45	4.71	43.01	44.06	33.79	16.52	24.92	1.99	0.54	0.14	1.86	1.49	0.34	0.03	0.2	0.02	0.02	2.81	2.81	1.2	33.74	23.45	27.38	7.12	17.19	7.44	12.72	7.63	2.22	12.01	50.48	21.93	3.84	0	0	0
814	FBtr0080833	protein_coding_gene	FBgn0001086	fzy	fizzy	CG4274	mRNA	FBtr0080833	fzy-RA		5.84	1.43	1.39	0	0.05	5.2	8.54	10.92	0.41	1.92	0.27	0	0	0	0.13	0	0	0	0.2	1.18	1.49	0	0	0.66	0	0	0	0	0	0	0	0	1.15	0.19	0.5	0	0	1.56	0.32
815	FBtr0073842	protein_coding_gene	FBgn0001087	g	garnet	CG10986	mRNA	FBtr0073842	g-RB		10.98	13.77	3.39	5.87	1.61	1.52	10.52	18.84	15.51	66.61	4.34	0	32.36	36.51	25.11	9.99	7.49	0	0	0	0	0.54	0.13	0	0	0	6.61	30.66	0	2.18	5.43	0.85	4.08	60.6	21.58	6.76	0	3.31	1.47
816	FBtr0331709	protein_coding_gene	FBgn0001087	g	garnet	CG10986	mRNA	FBtr0331709	g-RD		9.07	9.3	0.47	8.31	0	13.25	0	88.53	0	71.48	3.8	0	13.89	81.79	3.36	0	3.56	2.66	1.56	2.46	35.45	11.76	27.57	23.7	1.67	28.37	28.48	1.03	0	19.76	0	23.8	16.41	0	15.13	0	1.78	4.08	3.86
817	FBtr0331710	protein_coding_gene	FBgn0001087	g	garnet	CG10986	mRNA	FBtr0331710	g-RF		5.38	9.74	17.96	0	18.15	0	20.45	40.42	31.69	10.35	6.15	33.29	17.6	0	3.29	13.61	0.42	7.5	35.17	53.04	10.99	20.37	6.4	8.96	31.01	49.98	26.3	12.88	24.69	3.62	4.26	0.96	0	29.49	0	12.34	1.23	0	0
818	FBtr0079230	protein_coding_gene	FBgn0001089	Gal	β galactosidase	CG9092	mRNA	FBtr0079230	Gal-RA		0	0	0	0	0	0	0	0	0	0	4.47	0	0	0	0	0	0	0	0	0	0	0	0	0	0	0	0	0	0	0	0	0	0	0	0	0	0	0	0
819	FBtr0332603	protein_coding_gene	FBgn0001089	Gal	β galactosidase	CG9092	mRNA	FBtr0332603	Gal-RB		0	0.42	0.05	0.98	0	1.16	0	0.12	0	0	0	0	0	0	0.34	0	8.24	0	0	0.23	0.31	0	0.12	0	0	0	0.59	0	0	0	0	0.43	0.04	0.25	0	0	0.13	0	0
820	FBtr0074656	protein_coding_gene	FBgn0001090	bnb	bangles and beads	CG7088	mRNA	FBtr0074656	bnb-RB		0.17	0.18	0	0.5	0	78.76	2.27	0	0	0.63	636.83	1.38	50.34	4.82	0.27	0	167.13	65.82	165.05	0	6.2	227.99	400.06	2.51	47.8	0	10.25	4.72	2.49	5.8	5.34	272.57	52.24	0	43.12	114.46	0.25	0	0
821	FBtr0074657	protein_coding_gene	FBgn0001090	bnb	bangles and beads	CG7088	mRNA	FBtr0074657	bnb-RC		0	0	0	0	0	0	0	0	0	0	49.68	0	0	0	1.05	0	0	1.2	0	0	0	0	3.01	0	0	0	0	0	0	4.46	3.01	12.65	0	0	0	0	0	0	0
822	FBtr0074658	protein_coding_gene	FBgn0001090	bnb	bangles and beads	CG7088	mRNA	FBtr0074658	bnb-RA		0	0	5.49	0	0	0.25	0	0	0	0	2.98	0	0	0	0	0	0	2.38	0	0	0	1.65	0	0	0	0	0	0.49	0	0	2.03	2.41	0	0	0	0	0	0	0
823	FBtr0074659	protein_coding_gene	FBgn0001090	bnb	bangles and beads	CG7088	mRNA	FBtr0074659	bnb-RD		2.05	5.68	100.89	104.28	1.65	0	46.27	2.46	0	0.51	556.03	26.68	0	241.7	3.58	0.07	67.82	245.08	168.12	0.45	4.36	59.27	158.52	0	0	39.6	0	3.67	9.55	13.1	48.69	195.86	71.59	25.33	0	103.26	0	0	0.18
824	FBtr0088903	protein_coding_gene	FBgn0001091	Gapdh1	Glyceraldehyde 3 phosphate dehydrogenase 1	CG12055	mRNA	FBtr0088903	Gapdh1-RA		0	0.67	0	0	0	0	0	0	0	0	23.16	0	0	0	0	0	0	0	0	0	0	0	2.38	19.94	0	0	2.17	0	0	0	0	3.78	1.01	0	0.79	0	0	0	0
825	FBtr0100479	protein_coding_gene	FBgn0001091	Gapdh1	Glyceraldehyde 3 phosphate dehydrogenase 1	CG12055	mRNA	FBtr0100479	Gapdh1-RB		38.4	25.71	25.62	67.08	32.25	12.12	28.95	46.84	38.56	33.52	102.56	2.79	0.21	161.89	88.56	78.88	81.55	31.65	10.08	35.16	18.99	27.28	25.54	13.81	3.06	61.15	53.61	58.34	93.7	72.18	19.55	134.82	5.9	9.6	30.46	28.41	656.79	628.4	710.1
826	FBtr0074112	protein_coding_gene	FBgn0001092	Gapdh2	Glyceraldehyde 3 phosphate dehydrogenase 2	CG8893	mRNA	FBtr0074112	Gapdh2-RA		1.44	0	0	0	0	0	0	0	0	0	49.18	0	0	0	0	3.41	0	1.24	0	0	7.96	23.63	10.94	53.65	0	0	2.19	3.56	0	0	0	53.55	43.42	0	70.09	0	508.53	310.01	208.78
827	FBtr0332618	protein_coding_gene	FBgn0001092	Gapdh2	Glyceraldehyde 3 phosphate dehydrogenase 2	CG8893	mRNA	FBtr0332618	Gapdh2-RC		54.07	98.69	80.81	22.86	41.72	139.88	189.1	52.78	71.72	58.36	75.5	55.72	81.71	19.5	92.65	111.48	13.32	67.28	16.75	37.08	97.98	85.76	114.12	43.62	0	1.08	55.31	40.79	118.72	86.54	26.93	150.94	99.85	21.53	115.29	8.69	712.46	937.27	1093.21
828	FBtr0089496	protein_coding_gene	FBgn0001098	Gdh	Glutamate dehydrogenase	CG5320	mRNA	FBtr0089496	Gdh-RB		0	19.7	37.63	6.5	0	0	21.34	4.08	0	3.06	1.25	21	0	0	0.23	0	0	4.53	0	0	0.33	0	0.28	2.03	0	0	31.01	0	0	0	0.04	2.73	0.41	49.02	29.85	0	0	1.66	19.84
829	FBtr0089497	protein_coding_gene	FBgn0001098	Gdh	Glutamate dehydrogenase	CG5320	mRNA	FBtr0089497	Gdh-RF		94.13	51	68.81	37.87	5.52	78.05	129.37	57.55	54.86	49.93	32.37	1.28	52.63	14.61	63.5	2.57	22.83	3.14	0	0	84.88	48.31	6.5	29.72	0	0	26.47	31.38	69.87	32.21	76.73	11.52	65.29	0	30.03	2.43	6.68	41.5	24.11
830	FBtr0089498	protein_coding_gene	FBgn0001098	Gdh	Glutamate dehydrogenase	CG5320	mRNA	FBtr0089498	Gdh-RA		23.5	16.31	30.42	0.58	0	0	56.89	24.43	21.45	35.83	4.59	0.47	0	0	5.04	0	0	0.7	127.4	0	17.85	0	0.1	1.72	0	0	15.63	23.49	7.26	9.48	0.94	0.51	5.39	28.54	11.03	0	0	12.29	5.33
831	FBtr0335205	protein_coding_gene	FBgn0001098	Gdh	Glutamate dehydrogenase	CG5320	mRNA	FBtr0335205	Gdh-RD		0	44.04	55.03	232.88	186.97	231.24	102.36	7.71	0	13.59	16.62	55.69	0	0	28.05	52.69	0	100.74	0	24.14	1.3	54.77	47.44	71.45	11.79	11.05	54.42	0	0	0	81.05	70.24	12.18	0	104.73	36.5	66.12	0.69	20.89
832	FBtr0091757	protein_coding_gene	FBgn0001099	gdl	gonadal	CG33756	mRNA	FBtr0091757	gdl-RA		0	1.28	0	0	0	1.5	0	0	0	0	0	0	0	2.53	1.83	0.49	0.24	0	0.29	91.79	6.69	0	3.62	0	0	4.76	1.11	1.02	0	0.33	3.23	0	0	0	0	0	0	0	0
833	FBtr0334082	protein_coding_gene	FBgn0001099	gdl	gonadal	CG33756	mRNA	FBtr0334082	gdl-RB		0	0	0	0	0	0	0	0	0	0	3.62	0	29.25	0	0	0	0	0	0	0	13.31	0	21.87	0	0	0	12.38	0	0	0	0	17.2	51.42	0	6.34	0	0	0	0
834	FBtr0346516	protein_coding_gene	FBgn0001099	gdl	gonadal	CG33756	mRNA	FBtr0346516	gdl-RC		7.21	10.62	11.78	0.53	0	0	0	2.18	0.11	9.59	2.97	6.38	0	0	0	0	0	0	0	0	2.09	0.28	0	1.69	0	0	0	0	0	0	5.16	0	0	0	0	0	4.44	8.68	15.26
835	FBtr0076934	protein_coding_gene	FBgn0001104	Gαi	G protein α i subunit	CG10060	mRNA	FBtr0076934	Gαi-RA		0.55	0	0	0	0	0	0	0	0	0	24.01	0	0	0	25.34	0	0.2	0.21	0	0	0	0	19.85	0	0	0	7.15	0	0	0	0	29.79	1.45	0.09	0.36	0	0	0	0
836	FBtr0074107	protein_coding_gene	FBgn0001105	Gβ13F	G protein β-subunit 13F	CG10545	mRNA	FBtr0074107	Gβ13F-RA		0	0	0	4.51	0	0	0	0	0	0	0.29	1.07	0	0	0	0	0	0	0	0.16	0	0.24	0.99	0	0	0	0	0	0	0.14	0	0	0	0	0	0	0	0.62	0
837	FBtr0074108	protein_coding_gene	FBgn0001105	Gβ13F	G protein β-subunit 13F	CG10545	mRNA	FBtr0074108	Gβ13F-RC		47.15	54.53	62.69	89.47	33.48	0	77.8	62.06	11.44	111.33	26.91	0	80.84	0	24.94	14.7	29.67	10.73	97.6	34.67	200.49	177.09	162.7	148.09	208.71	95.23	70.04	33.45	4.61	0	14.05	12.23	69.47	7.91	88.03	346.11	31.94	27.61	43.46
838	FBtr0074110	protein_coding_gene	FBgn0001105	Gβ13F	G protein β-subunit 13F	CG10545	mRNA	FBtr0074110	Gβ13F-RE		67.24	224.34	218.54	33.79	0	236.7	0	154	33.92	55.12	68.76	360.98	279.98	125.47	62.16	44.73	171.99	261.17	307.08	25.41	384.02	488.86	231.98	243.02	290.33	31.57	128.74	98.93	29.57	117.51	6.36	92.15	167.16	212.84	182.71	29.76	34.31	20.41	52.14
839	FBtr0074111	protein_coding_gene	FBgn0001105	Gβ13F	G protein β-subunit 13F	CG10545	mRNA	FBtr0074111	Gβ13F-RF		275.78	174.25	139.67	182.63	100.11	31.53	120.53	105.5	158.08	128.05	69.63	186.71	136.86	0.2	118.88	81.84	35.72	2.59	35.81	457.16	165.94	86.74	191.25	277.99	139.33	534.63	61.04	17.2	74.27	3.46	118.07	86.73	121.75	0	15.15	26.81	43.65	7.85	3.3
840	FBtr0331597	protein_coding_gene	FBgn0001105	Gβ13F	G protein β-subunit 13F	CG10545	mRNA	FBtr0331597	Gβ13F-RG		40.37	40.52	75.96	47.34	54.77	46.1	253.42	44.9	17.67	52.52	19.58	16.81	24.53	0	41.92	36.45	22.47	31.35	20.85	131.66	81.77	18.76	9.12	13.99	1.28	2.43	14.97	11.26	0.63	17.1	43.07	37.81	33.38	8.05	37.41	26.22	73.6	59.86	104.27
841	FBtr0346794	protein_coding_gene	FBgn0001105	Gβ13F	G protein β-subunit 13F	CG10545	mRNA	FBtr0346794	Gβ13F-RH		32.84	44.15	53.34	32.58	95.3	94.81	221.18	47.13	7.92	18.7	16.17	52.9	18.19	1082.71	74.49	1.97	25.5	50.11	40.76	73.04	48.56	52.51	25.85	29.67	31.54	13.86	16.27	22.77	17.32	100.87	3.97	18.03	7.58	60.65	34.39	16.59	82.42	99.75	79.04
842	FBtr0075756	protein_coding_gene	FBgn0001108	DCTN1-p150	Dynactin 1, p150 subunit	CG9206	mRNA	FBtr0075756	DCTN1-p150-RA		20.24	29.19	14.23	29.73	7.61	36.7	5.05	22.1	5.72	16.67	10.32	5.56	53.69	10.79	6.17	64.75	1.03	22.93	3.9	3.97	5.25	11.15	3.8	20.29	8.74	22.96	27.3	17.96	1.46	57.75	20.85	13.03	7.53	0	10.05	0.1	5.44	4.22	4.93
843	FBtr0081596	protein_coding_gene	FBgn0001112	Gld	Glucose dehydrogenase	CG1152	mRNA	FBtr0081596	Gld-RA		0	0	0	0	0	0	0	0.05	0.21	0.29	0.33	0	0	0	0.02	2.11	0	0	0	0	0	0.08	3.57	1.35	0	0	0.11	0.32	0.04	0	0	0.05	0.14	0	0	0	0	0	0
844	FBtr0472596	protein_coding_gene	FBgn0001112	Gld	Glucose dehydrogenase	CG1152	mRNA	FBtr0472596	Gld-RB		0	0	0	0	0	0	0	0.05	0.21	0.29	0.33	0	0	0	0.02	2.11	0	0	0	0	0	0.08	3.57	1.35	0	0	0.11	0.32	0.04	0	0	0.05	0.14	0	0	0	0	0	0
845	FBtr0079727	protein_coding_gene	FBgn0001114	Glt	Glutactin	CG9280	mRNA	FBtr0079727	Glt-RA		5.07	0	0	0	0	0	0	0	0	0	0.55	0.16	0	0	0	0	0	0	0	0	1.46	0	0	0	0.04	0	0	0	0	0	0	0	0	0	0	0	0	0	0
846	FBtr0307091	protein_coding_gene	FBgn0001114	Glt	Glutactin	CG9280	mRNA	FBtr0307091	Glt-RD		7.31	10	9.27	3.95	2.54	0	29.52	1.22	1.74	2.2	1.08	0	0.51	11.94	1.08	6.14	8.77	0.08	0	4.13	0	1.69	0.06	3.64	0	43.71	5.8	0	0	0.03	0.16	0.16	0.03	1.44	3.01	7.44	0	0	0
847	FBtr0075697	protein_coding_gene	FBgn0001120	gnu	giant nuclei	CG5272	mRNA	FBtr0075697	gnu-RA		0.5	0.4	0.14	0.12	0	0	0	1.4	0	0.74	0.16	1.14	0	0	0	0	0	0	1.71	0	2.37	0.36	0	0.37	0	0	47.71	0	0	0	0	0	0	0	0	0	0	0	0
848	FBtr0088264	protein_coding_gene	FBgn0001122	Gαo	G protein α o subunit	CG2204	mRNA	FBtr0088264	Gαo-RB		44.26	45.26	33.42	16.09	0	6.15	14.79	59.26	12.53	25.99	20.18	30.29	7.21	3.15	22	13.44	1.35	5.66	1	4.41	61.11	43.12	20.37	44.28	2.33	22.78	30.91	4.98	0	11.13	12.45	33.86	26.59	69.21	16.53	18.73	8.31	10.33	18.17
849	FBtr0088265	protein_coding_gene	FBgn0001122	Gαo	G protein α o subunit	CG2204	mRNA	FBtr0088265	Gαo-RC		0	0	0	0	0.98	0	0	0	0.8	0	0	0	0	0	0	0	0	0	0	0	0	0	0	0	0	0	0	0	0	0	0	0	0	0	0	0	0	0	0
850	FBtr0088266	protein_coding_gene	FBgn0001122	Gαo	G protein α o subunit	CG2204	mRNA	FBtr0088266	Gαo-RA		123.97	129.73	108.16	96.24	1.53	0.93	154.73	353.92	74.29	165.93	47.18	471.26	65.05	907.83	52.03	34.5	137.78	182.59	623.71	248.57	61.89	130.25	249.65	31.97	325.96	200.56	52.59	159.66	2.82	134.86	34.94	59.52	16.26	456.61	1.95	324.64	5.64	1.43	5.22
851	FBtr0088267	protein_coding_gene	FBgn0001122	Gαo	G protein α o subunit	CG2204	mRNA	FBtr0088267	Gαo-RD		0	0	1.04	0.77	0	0	0	0	0	1.59	1.73	0	0	0	0	0	0	1.26	0	0	6.81	0	2.54	0	0	0	0	0	0	0	0	0	0	0	2.5	0	0	0	0
852	FBtr0088268	protein_coding_gene	FBgn0001122	Gαo	G protein α o subunit	CG2204	mRNA	FBtr0088268	Gαo-RE		0	0	1.38	0	0	0	0	0	0	0	0	0	0	0	0	0	0	0	0	0	0	0	0	0	0	0	0	0	0.29	0	0	0	0	0	0	0	0	0	0
853	FBtr0088269	protein_coding_gene	FBgn0001122	Gαo	G protein α o subunit	CG2204	mRNA	FBtr0088269	Gαo-RF		0	0	0	0	0	0	0	0	26.46	0	0	0	0	0	0	0	1.38	3.19	42.51	0	0	0	0	0	0	0	0	0	0	0	0	0	0	0	25.52	0.21	0	0	0
854	FBtr0088270	protein_coding_gene	FBgn0001122	Gαo	G protein α o subunit	CG2204	mRNA	FBtr0088270	Gαo-RG		3.28	0.52	0.59	1.47	0	0	0	0	0	0	1.16	0	0	0	0	0	5.65	3.08	0	0	0	0	0.65	0.56	0	0	0	33.99	1.6	0	0.77	0	0.34	0	1.69	0	0	0.44	0
855	FBtr0088271	protein_coding_gene	FBgn0001122	Gαo	G protein α o subunit	CG2204	mRNA	FBtr0088271	Gαo-RH		5.37	4.54	0	1.48	0	0.44	0	53.25	4.24	4.28	31.17	0.31	1.45	0	1.81	2.9	1.53	0.97	0	0	25.08	2.41	1.8	0	0	1.43	3.12	1.33	0	0	6.29	18	0	2.54	2.55	0.21	0	0	0
856	FBtr0088272	protein_coding_gene	FBgn0001122	Gαo	G protein α o subunit	CG2204	mRNA	FBtr0088272	Gαo-RI		89.93	114.51	146.53	195.63	252.76	222.56	171.14	224.12	103.59	202.25	133.31	901	694.3	297.67	129.84	205.89	261.36	217.69	486.82	635.52	660.85	866.75	418.2	699.48	967.26	454.87	142.78	81.32	102.99	80.5	95.22	155.66	406.36	658.4	275.44	528.67	74.85	37.96	67.4
857	FBtr0333064	protein_coding_gene	FBgn0001122	Gαo	G protein α o subunit	CG2204	mRNA	FBtr0333064	Gαo-RJ		198.09	240.16	148.5	56.03	237.68	261.66	24.68	171.07	84.71	195.1	107.92	0	791.16	1305.31	181.44	73.09	190.83	143.37	0	0	457.93	686.01	259.51	142.71	607.54	15.68	144.29	68.02	39.94	129.95	30.39	79.81	356.53	69.69	40.89	0	0	0	0
858	FBtr0072142	protein_coding_gene	FBgn0001123	Gαs	G protein α s subunit	CG2835	mRNA	FBtr0072142	Gαs-RC		71.19	79.31	30.74	44.18	43.3	274.55	127.33	95.88	46.39	45.2	3.66	0.46	0	28.85	19.03	56.47	5.75	0.05	33.73	27.77	1.58	5.88	17.35	78.42	0	67.14	28.59	41.74	104.34	18.31	39.19	3.69	12.69	3.63	23.78	4.84	42.92	2.05	46.85
859	FBtr0072143	protein_coding_gene	FBgn0001123	Gαs	G protein α s subunit	CG2835	mRNA	FBtr0072143	Gαs-RB		0.62	0.72	1.3	0.09	0	0	0	0	0	0.51	15.8	0	2.94	0	0	0	0	0	0	0	50.35	17.48	6.22	58.36	29.47	0	7.51	1.14	0.1	0	0	44.24	75.31	0	88.42	0	0	23.3	0.7
860	FBtr0072144	protein_coding_gene	FBgn0001123	Gαs	G protein α s subunit	CG2835	mRNA	FBtr0072144	Gαs-RA		1.05	1.1	0.69	0.35	0	0	0	0	0	1.02	16.06	0	42.9	0	0	18.37	0	0	0	0	42.78	1.5	6.47	133.21	0.02	0	21.74	1.07	0.44	0	0	14.08	165.48	0	110.78	0	0	1.18	0.28
861	FBtr0301411	protein_coding_gene	FBgn0001123	Gαs	G protein α s subunit	CG2835	mRNA	FBtr0301411	Gαs-RD		32.7	49.36	52.66	17.43	0	24	2.98	11.64	1.2	27.92	1.78	13.94	0	0	2.63	0	0	25	2.57	0	0.61	55.44	9.76	18.5	0	0	5.61	17.23	6.29	6.44	2	5.52	1.84	0	9.4	0	9.05	17.21	17.88
862	FBtr0343279	protein_coding_gene	FBgn0001123	Gαs	G protein α s subunit	CG2835	mRNA	FBtr0343279	Gαs-RE		14.4	19.36	3.91	0	4.6	3.02	0	7.71	0.94	2.29	7.59	0	0	0	0.62	0	1.51	0	0	0	6.19	0	2.61	4.59	36.38	0	0	0	0	0.71	12.33	4.85	2.25	0	7.1	0	0	2.43	0
863	FBtr0087231	protein_coding_gene	FBgn0001124	Got1	Glutamate oxaloacetate transaminase 1	CG8430	mRNA	FBtr0087231	Got1-RB		0	5.1	0	10.33	0	40.11	15.61	2.83	1.1	4.6	0	0	0	0	7.75	0	0.5	0	0	3.48	0	0	0	16.72	0	0	0	0	0	0	0	0	15.8	0	0	0	15.97	0	6.54
864	FBtr0087232	protein_coding_gene	FBgn0001124	Got1	Glutamate oxaloacetate transaminase 1	CG8430	mRNA	FBtr0087232	Got1-RA		3.71	0.09	1.82	0.29	3.84	0.62	0.27	0.08	0.02	0.15	58.06	0	0	0	0.3	0	0.01	1.76	0	0.04	5.26	18.93	23.87	0.05	0.72	0	104.3	22.29	1.06	16.47	17.8	71.2	0.04	0	14.75	0	0.22	0	0.14
865	FBtr0077867	protein_coding_gene	FBgn0001125	Got2	Glutamate oxaloacetate transaminase 2	CG4233	mRNA	FBtr0077867	Got2-RA		6.28	0	13.22	0	0	0	0	14.63	7.49	0	29.11	0	0	0	0	0	0	0	0	0	0	0	0	0	0	0	0	0	0	0	0	4.73	0	0	0.8	0	0	4.12	0
866	FBtr0077868	protein_coding_gene	FBgn0001125	Got2	Glutamate oxaloacetate transaminase 2	CG4233	mRNA	FBtr0077868	Got2-RB		0	13.73	0	0.07	23.01	1.73	0	0	0	6.16	0	1.08	124.72	0.29	16.64	16.14	0	0	1.36	0	3.19	0.12	4.41	3.85	0	0	2.18	25.56	1.48	0.9	0	0	0	0	0	0	12.59	0	5.8
867	FBtr0079146	protein_coding_gene	FBgn0001128	Gpdh1	Glycerol-3-phosphate dehydrogenase 1	CG9042	mRNA	FBtr0079146	Gpdh1-RB		4.22	0	4.43	0	0	0	0	7.65	0	0	3.19	0	0.12	0	0	0	0	0	0	0	0	0	0	0	9.58	0	0	0	0	0	0	0	0	0	0	0	0	0	0
868	FBtr0079147	protein_coding_gene	FBgn0001128	Gpdh1	Glycerol-3-phosphate dehydrogenase 1	CG9042	mRNA	FBtr0079147	Gpdh1-RC		42.02	46.21	29.46	30.75	26.6	123.46	71.86	69.53	109.63	71.1	31.58	23.93	0	0	18.22	26.58	11.21	13.09	4.44	1.05	8.32	0.27	0	62.46	40.4	1.44	0	102.45	7.07	101.6	35.17	0	0	0	30.08	8.36	108.06	59.36	128.99
869	FBtr0079148	protein_coding_gene	FBgn0001128	Gpdh1	Glycerol-3-phosphate dehydrogenase 1	CG9042	mRNA	FBtr0079148	Gpdh1-RA		37.1	35.44	48.67	83.34	15.68	93.69	7.48	107.54	40.62	58.34	12.1	3.62	42.17	62.29	23.14	10.23	1.13	18.01	1.05	4.06	54.67	6.54	47.16	20.55	184.29	35.92	124.92	35.91	14.16	11.53	12.23	34.38	40.64	3.2	48.68	9.78	4.46	0.6	1.03
870	FBtr0333228	protein_coding_gene	FBgn0001128	Gpdh1	Glycerol-3-phosphate dehydrogenase 1	CG9042	mRNA	FBtr0333228	Gpdh1-RE		0	0	0	0	0	0	0	0	0	0	0	0	0	0	0	0	0	0	0	0	0	0	0	0	0	0	0	0	0	2.85	0	2.79	0	0	0	0	0	0	0
871	FBtr0333229	protein_coding_gene	FBgn0001128	Gpdh1	Glycerol-3-phosphate dehydrogenase 1	CG9042	mRNA	FBtr0333229	Gpdh1-RF		11.44	12.35	9.67	9.46	5.4	30.37	16.13	17.17	8.68	14.69	2.54	2.72	9.76	2.54	3.97	0.34	0	0.7	0	4.54	3.21	8.67	6.67	13.02	2.24	41.65	32.57	6.18	3	2.01	1.1	3.43	16.24	22.86	14.72	16.21	2.8	1.31	5.56
872	FBtr0333230	protein_coding_gene	FBgn0001128	Gpdh1	Glycerol-3-phosphate dehydrogenase 1	CG9042	mRNA	FBtr0333230	Gpdh1-RG		0.7	1.25	2.2	3.57	14.93	12.79	46.7	20.14	1.9	3.23	29.51	8.22	18.03	2.82	2.92	0.77	0	0.73	0.54	0	44.47	62.77	28.5	66.24	14.46	0	39.54	2.14	0.26	3.05	4.57	13.46	78.17	0.1	38.29	1.46	1.77	8.01	7.95
873	FBtr0071548	protein_coding_gene	FBgn0001133	grau	grauzone	CG33133	mRNA	FBtr0071548	grau-RA		7.45	1.81	7.48	0	2.55	0	0	15.29	1.37	7.99	1.15	0	0	0	9.93	4.61	0	0	0	0	26.35	0	0.91	3.23	0	0.11	2.28	6.64	0	9.03	1.96	0.65	8.49	5.57	1.61	0	0.81	4.61	8.74
874	FBtr0075139	protein_coding_gene	FBgn0001134	Grd	Glycine receptor	CG7446	mRNA	FBtr0075139	Grd-RA		0.2	0	0	0	0	4.87	3.17	0	0.02	0	1.17	0	0	0	0.06	0	0	0.44	0	0	0	0	0.39	0	0.03	0.19	1.96	0	0	0	0	0	0	0	0	0	0	0	0
875	FBtr0079708	protein_coding_gene	FBgn0001137	grk	gurken	CG17610	mRNA	FBtr0079708	grk-RA		0.49	0.87	0.14	0.44	3.98	1.97	0.14	4.88	0.43	9.31	1.28	0.81	11.89	0	0.08	0	0	0.22	0.41	0.18	2.94	0.53	0.77	4.94	0.1	0	9.21	0	0	0.27	0	0	4.32	0	17.7	0	0	0.41	0.19
876	FBtr0081808	protein_coding_gene	FBgn0001138	grn	grain	CG9656	mRNA	FBtr0081808	grn-RA		0	0	0	0	0	0	0.06	0	0	0	1	0	1.44	0	0	0	0	0.52	1.31	0.35	0.31	0	8.23	1.21	0.08	0	0	0	0	0	0	0	1.31	0	0.36	0	0	0	0
877	FBtr0300040	protein_coding_gene	FBgn0001138	grn	grain	CG9656	mRNA	FBtr0300040	grn-RB		0	0	0	0	0	0	0	0	0	0	0.08	0	0	0	0	0	0	0	0	0	0	0	0	0	0	0	0	0	0	0	0	0	0	0	0	0	0	0	0
878	FBtr0330188	protein_coding_gene	FBgn0001138	grn	grain	CG9656	mRNA	FBtr0330188	grn-RC		0	0	0	0	0	0	0	0	0	0	0.08	0	0	0	0	0	0	0	0	0	0	0	0	0	0	0	0	0	0	0	0	0	0	0	0	0	0	0	0
879	FBtr0084962	protein_coding_gene	FBgn0001139	gro	groucho	CG8384	mRNA	FBtr0084962	gro-RB		0	0	0	0	0	0	0	0	0	0	0	0	0	0	0	0	0	0	0	0	0	0	0	0	0	0	0	0	0	0	0	0	0	0	0	0	0.18	0	0.73
880	FBtr0084963	protein_coding_gene	FBgn0001139	gro	groucho	CG8384	mRNA	FBtr0084963	gro-RA		24.63	16	12.98	6.25	1.27	21.56	3.14	19.94	8.75	4.42	2.13	0	2.46	0	6.14	2.19	0	1.46	0	0	3.94	14.92	0.25	12.67	0.26	7.08	0.17	5.8	0.36	21.81	24.93	1.45	6.24	3.76	1.72	1.03	5.46	9.64	4.87
881	FBtr0084964	protein_coding_gene	FBgn0001139	gro	groucho	CG8384	mRNA	FBtr0084964	gro-RD		0	0	0	0	0	0	0	0	0	0	0	0	0	0	0	0	0	0	0	0	0	0	0	0	0	4.47	0	0.02	0	0	0	0	0	0	0	0	0	0	0
882	FBtr0084965	protein_coding_gene	FBgn0001139	gro	groucho	CG8384	mRNA	FBtr0084965	gro-RC		0.24	0.47	0.68	2.63	0	0.3	0	0.52	0.49	5.59	0.12	0	0	0.2	26.29	32.87	0.34	0.48	0	0	0.59	0	0.15	0	0	0	0.06	0.42	0	0	1.98	0	0.09	0	0.09	0.14	0.29	0	0
883	FBtr0084966	protein_coding_gene	FBgn0001139	gro	groucho	CG8384	mRNA	FBtr0084966	gro-RE		0	0	0	0	0	0	0	0	0	0	0	0	0	0	0	0	0	0	0	0	0	0	0	0	0	0	0	0	0	0	0	0	0.1	0	0	0	0	0	0
884	FBtr0302951	protein_coding_gene	FBgn0001139	gro	groucho	CG8384	mRNA	FBtr0302951	gro-RF		7.19	18.36	13.2	10.96	0	0.18	0	24.9	4	29.3	3.58	0	0	0	2.82	5	0	0	0	0	2.95	0.78	2.38	1.22	0	0	0.9	62.57	1.14	3.68	6.27	0.17	10.94	0	5.72	28.47	1.84	0.83	0
885	FBtr0302952	protein_coding_gene	FBgn0001139	gro	groucho	CG8384	mRNA	FBtr0302952	gro-RG		0	0	0	0	0	0	0	0	0	0	0	0	0	0	0	0	0	0	0	0	0	0	0	0	0	0	0	0	0	0	0	0	0	0	0	0	0	0	0
886	FBtr0305047	protein_coding_gene	FBgn0001139	gro	groucho	CG8384	mRNA	FBtr0305047	gro-RH		0	0	0	0	0	0	0	0	0	0	0	0	0	0	0	0	0	0	0	0	0	0	0	0	0	0	0	0	0	0	0	0	0	0	0	0	0	0	0
887	FBtr0337057	protein_coding_gene	FBgn0001139	gro	groucho	CG8384	mRNA	FBtr0337057	gro-RI		2.38	2.8	2.59	45.74	14.78	0	28.03	0	0	5.23	0.84	109.13	0	69.04	4.88	0	0	11.85	0.14	0	2.51	63.65	6.12	57.07	164.6	62.78	2	0	1.22	0	0	0	32.68	0	12.26	122.49	1.66	0.3	0.6
888	FBtr0339900	protein_coding_gene	FBgn0001139	gro	groucho	CG8384	mRNA	FBtr0339900	gro-RJ		16	22.23	24.34	0	0	8.35	0	23.56	3.56	9.03	10.99	2.23	88.24	0	10.36	12.76	30.04	25.39	53.9	51.01	44.75	36.05	30.42	80.02	5.62	0	32.9	35.41	32.72	3.89	8.18	35.71	11.47	5.12	17.41	0	0	0	0
889	FBtr0078114	protein_coding_gene	FBgn0001142	Gs1	Glutamine synthetase 1	CG2718	mRNA	FBtr0078114	Gs1-RB		18.77	21.15	11.54	14.65	0.95	3.58	36.28	24.71	24.51	35.18	15.49	10.95	128.99	0	7.51	9.56	6.75	5.93	3.27	5.07	76.02	40.99	10.81	13.77	0	5.24	35.61	8.8	3.91	33.48	29.56	16.07	21.29	2.31	33.88	11.19	53.56	49.97	56.99
890	FBtr0078115	protein_coding_gene	FBgn0001142	Gs1	Glutamine synthetase 1	CG2718	mRNA	FBtr0078115	Gs1-RC		0.24	2.28	4.56	0	0	1.47	5.75	12.28	0	12.96	3.42	0	11.46	0	4.26	2.1	0	0.59	0	0	81.78	33.33	0.92	16.5	0.81	0	4.01	3.81	0	0.34	1.65	1.49	18.49	0	14.74	0.42	0	12.37	1.1
891	FBtr0300568	protein_coding_gene	FBgn0001142	Gs1	Glutamine synthetase 1	CG2718	mRNA	FBtr0300568	Gs1-RD		4.23	0	11.33	0	164.47	70.68	0	17.21	0	0.03	0	0	0	0.53	30.62	61.42	0	0	0	0	0	0	0	0	1.43	0	0	16.23	14.93	18.36	24.53	0	0	0	4.57	13.86	0	26.54	8.05
892	FBtr0073494	protein_coding_gene	FBgn0001145	Gs2	Glutamine synthetase 2	CG1743	mRNA	FBtr0073494	Gs2-RB		0	0	0	0	0	0	0	0	0	0	0	0	0	0	0	0	0	0	0	0	0	0	0	0	0	0	0	0	0	0	0	0	39.43	0	0	0	0	0	0
893	FBtr0073495	protein_coding_gene	FBgn0001145	Gs2	Glutamine synthetase 2	CG1743	mRNA	FBtr0073495	Gs2-RC		0	0	3.57	0	0	0	0.36	3.28	0	4.15	46.13	0	0	0	2.82	0.7	0	4.56	47.45	0.7	1.47	0	5	0	4.75	0	9.24	0.89	1.58	2.95	12	59.62	3.43	19.47	8.11	0	0	0	9.04
894	FBtr0073496	protein_coding_gene	FBgn0001145	Gs2	Glutamine synthetase 2	CG1743	mRNA	FBtr0073496	Gs2-RA		4.06	0.31	2.28	0	0	0	0	1.42	0.75	2.31	1077.83	29.19	1.13	0	3.87	0	0	13.8	0.63	0	7.44	22.77	895.42	62.79	27.76	0	44.59	0	0	3.33	0	1722.13	263.79	0	45.75	0.13	0	0	0.92
895	FBtr0343561	protein_coding_gene	FBgn0001145	Gs2	Glutamine synthetase 2	CG1743	mRNA	FBtr0343561	Gs2-RD		0	0	0	0	0	0	0	0	0	0	0	0	0	0	0	0	0	0	0	0	0	0	0	0	0	0	0	0	0	0	0	0	0	0	4.64	0	0	0	0
896	FBtr0343562	protein_coding_gene	FBgn0001145	Gs2	Glutamine synthetase 2	CG1743	mRNA	FBtr0343562	Gs2-RE		0	0	0	0	0	0	0	0	0	0	13.39	0	0	27.01	0	0	0	0	0	0	0	0	0	0	0	0	26.95	0	0	0	0.24	0	6.49	0	0	0	0	0	0
897	FBtr0343563	protein_coding_gene	FBgn0001145	Gs2	Glutamine synthetase 2	CG1743	mRNA	FBtr0343563	Gs2-RF		0	0	0	0	0	0	0	0	0	0	98.75	0	0	36.46	0	0	0	0	0	0	0	0	12.65	1.39	0.63	0	0.53	0	0	0	1.38	43.24	1.92	0	1.05	0	0	0	0
898	FBtr0072461	protein_coding_gene	FBgn0001147	gsb-n	gooseberry-neuro	CG2692	mRNA	FBtr0072461	gsb-n-RA		0.32	0.15	0.43	0	0	0	0	3.96	5.16	0.6	0.81	5.65	0	0	0.66	0	0	0.27	5.94	0	0.87	0.14	0.23	8.39	2.8	0	1.08	0.06	0	0.56	0	0.67	16.32	0	1.06	0	0	0.15	0
899	FBtr0072444	protein_coding_gene	FBgn0001148	gsb	gooseberry	CG3388	mRNA	FBtr0072444	gsb-RA		0.26	0	0	0.06	0	2.22	0	0.09	0	0	0.05	0.08	0	0	0.33	0	0	0.82	0	0	6.16	0	0	11.38	0	0	0	0	0	0	0	0.08	0	0	0	0	0	0	0
900	FBtr0082607	protein_coding_gene	FBgn0001149	GstD1	Glutathione S transferase D1	CG10045	mRNA	FBtr0082607	GstD1-RA		187.46	172.4	191.72	24.2	1.74	73.41	150.53	17.41	19.52	13.44	66.3	0	0	1.53	0.37	5.96	0	0	0	0.19	0	2.09	5.17	0.53	0	0	3.78	5.26	0	0.16	0	54.59	11.57	0	5.26	0	0	0	0
901	FBtr0100410	protein_coding_gene	FBgn0001149	GstD1	Glutathione S transferase D1	CG10045	mRNA	FBtr0100410	GstD1-RB		0	19.34	0	0	0	0	0	4	0	0	145.64	0	0	0	0	0	0	0	0	0	0	0	91.59	0	0	0	61.6	0	0	0	0	302.14	18.13	0	21.44	0	0	14.94	0
902	FBtr0070460	protein_coding_gene	FBgn0001150	gt	giant	CG7952	mRNA	FBtr0070460	gt-RB		3.37	0.44	0.08	0.17	0	0	0	3.05	0	0.21	1.84	0.85	0.13	0.16	0.84	0.07	6.27	1.26	22.23	0	3.06	7.49	0.58	21.23	0.28	13.31	0.14	0	0.43	3.46	6.72	12.05	0.87	0	7.51	0	5.05	7.53	3.31
903	FBtr0076569	protein_coding_gene	FBgn0001168	h	hairy	CG6494	mRNA	FBtr0076569	h-RA		0.87	0.05	0.06	0	0	0	0	0	0	0	2.3	0	0	0.1	0	0.69	21.4	0	0	0	0.21	0	0	0.08	0	0	125.56	0.77	0	0.05	0	0.23	0.24	0	0	0	0	0	0
904	FBtr0100153	protein_coding_gene	FBgn0001168	h	hairy	CG6494	mRNA	FBtr0100153	h-RB		0	0	0	0	0	0	0	0	0	0	7.58	0	0	0	0	0	15.19	0.11	1.43	13.63	0	0	5.84	0	0	0	149.65	0	0	0	0	0.86	0	0	0	0	0	0	0
905	FBtr0083914	protein_coding_gene	FBgn0001169	H	Hairless	CG5460	mRNA	FBtr0083914	H-RA		0.78	0	2.33	0	2.89	0	4.98	3.34	7.82	0	2.44	18.11	23.86	10.64	0	0	0	1.61	0	0	4.18	20.38	1.42	18.02	0	0	0	0	0	0	3.99	0	7.2	1.05	0.9	20.11	0	0	0.17
906	FBtr0083915	protein_coding_gene	FBgn0001169	H	Hairless	CG5460	mRNA	FBtr0083915	H-RB		0.73	5.08	0.12	1.48	14.49	0	2.51	0.45	0	0	0	0	0	30.2	1.7	0	0	0	0	0	0	0	0	0	0	0	6.68	7.62	0	7.19	27.54	0	0	0	0	22.65	0	0	0
907	FBtr0083916	protein_coding_gene	FBgn0001169	H	Hairless	CG5460	mRNA	FBtr0083916	H-RD		12.73	17.06	16.71	46.93	0	2.02	2.31	15.39	14.01	13.35	1.42	0	0	0	14.23	45.74	31.49	3.52	0	0	0	0	0	1.15	27.81	0	17.93	9.26	0	3.64	0.43	2.79	13.59	0	2.43	0	0.34	0.45	1.1
908	FBtr0083917	protein_coding_gene	FBgn0001169	H	Hairless	CG5460	mRNA	FBtr0083917	H-RC		16.02	21.67	17.59	11.79	0	37.89	3.68	7.53	2.12	10.68	2.91	2.75	0	0	5.18	2.09	1.51	3.26	42.99	8.27	27.29	12.33	3.81	0.6	60.91	19.89	7.09	1.52	5.72	2.27	0	13.26	15.31	15.1	18.32	4.7	0	0	0
909	FBtr0079227	protein_coding_gene	FBgn0001170	H2.0	Homeodomain protein 2.0	CG11607	mRNA	FBtr0079227	H2.0-RA		0.13	0	0	0	0	0	0	0	0	0	0	0	0	0	0	0	0	0	0	0	0	0	0	0	0	0	0.4	0	0	0	0	0	0	0	0	0	0	0	0
910	FBtr0114554	protein_coding_gene	FBgn0001174	halo	halo	CG7428	mRNA	FBtr0114554	halo-RB		0	0	0	0	0	0	0	0.58	0	0	0	0	0	0	0	0	0	0	0	0	0	0	0	0	0	0	0	0	0	0	0	0	0	0	0	0	0	0	0
911	FBtr0076253	protein_coding_gene	FBgn0001179	hay	haywire	CG8019	mRNA	FBtr0076253	hay-RA		0	0	0	0	0	0	0	0	0	0	4.28	0	0	0	0	2.49	0	0	0	0	0	0	0	21.65	0	0	0	0	0	0	0	0.57	6.76	0	26.91	0	0	0	0
912	FBtr0114599	protein_coding_gene	FBgn0001179	hay	haywire	CG8019	mRNA	FBtr0114599	hay-RB		9.41	18.05	16.8	4.5	0	1.17	0	16.1	20.78	22.77	0	23.61	0	0	3.06	0.28	25.15	0.14	0.46	0	1.66	0	1.26	6.74	9.42	0.64	6.55	3.65	1.09	5.8	10.98	1.25	0	0	0.52	0	1.89	14.87	8.11
913	FBtr0081950	protein_coding_gene	FBgn0001180	hb	hunchback	CG9786	mRNA	FBtr0081950	hb-RB		0.19	0.27	0	0	0	0	0	0.09	0	1.58	1.23	0.17	0	0	0.04	2.55	0.09	1.41	0.08	24.8	2.63	0	1.31	0	0	7.94	6.63	23.39	0.42	9.01	5.85	10.08	11.89	9.92	0	3.74	0	0	0
914	FBtr0081951	protein_coding_gene	FBgn0001180	hb	hunchback	CG9786	mRNA	FBtr0081951	hb-RA		0	0	0	0	0	0	0	0	0	0	0.23	0	0.17	0	0	0	0	0	0	5.72	10.72	0.34	1.27	0.22	0	0	9.42	0.17	0	0.29	0.17	0.31	0.35	0	0.41	0	0	0	0
915	FBtr0080883	protein_coding_gene	FBgn0001185	her	hermaphrodite	CG4694	mRNA	FBtr0080883	her-RA		6.53	5.99	19.15	2.41	9.87	38.49	0.16	10.85	21.37	5.41	3.86	17.92	0	0	2.08	21.31	0	8.36	0	0	0	0	13.5	18.27	2.59	5.72	16.28	14.41	0	3.87	67.66	0.23	5.86	0	0.72	69.6	4.99	4	9.6
916	FBtr0335138	protein_coding_gene	FBgn0001185	her	hermaphrodite	CG4694	mRNA	FBtr0335138	her-RB		1.55	0	0	0	0	0	0	0	2.15	0	2.01	0	2.74	0.28	0	0.37	0	0	0	0.29	17.91	3.05	0.33	19.28	0	0	1.45	0	0.05	0	0	0	11.68	0.4	3.32	0	0	0	0
917	FBtr0071361	protein_coding_gene	FBgn0001186	Hex-A	Hexokinase A	CG3001	mRNA	FBtr0071361	Hex-A-RA		9.37	15.05	8.93	0.46	0	0	17.62	22.95	5.83	14.89	5.55	0	0	0	2.56	2.61	0	31.07	0	0	0	0	0	0	0	160.49	0	13.27	0.52	11.92	18.53	8.58	0	0	0	0	28.98	25.54	27.48
918	FBtr0071362	protein_coding_gene	FBgn0001186	Hex-A	Hexokinase A	CG3001	mRNA	FBtr0071362	Hex-A-RB		9.37	15.05	8.93	0.46	0	0	17.62	22.95	5.83	14.89	5.55	0	0	0	2.56	2.61	0	31.07	0	0	0	0	0	0	0	160.49	0	13.27	0.52	11.92	18.53	8.58	0	0	0	0	28.98	25.54	27.48
919	FBtr0333335	protein_coding_gene	FBgn0001186	Hex-A	Hexokinase A	CG3001	mRNA	FBtr0333335	Hex-A-RC		108.28	134.18	136.75	59.05	54.75	107.25	100.91	71.37	43.17	73.45	118.86	129.05	287.83	295.78	83.23	31.88	87.77	122.42	164.22	134.23	247.3	432.04	277.35	257.02	782.57	221.97	127.21	35.44	22.12	25.41	32.7	151.11	318.08	267.01	195.24	729.99	91.65	63.38	99.04
920	FBtr0087399	protein_coding_gene	FBgn0001187	Hex-C	Hexokinase C	CG8094	mRNA	FBtr0087399	Hex-C-RA		2.15	2.43	2.32	0	0	1.63	0	1.71	0	3.41	3.68	0.75	0.17	0	25.97	0.43	0	0	0	0	0	2.24	0.12	0	0	209.06	0	0	0	0	0	4.04	5.74	0	1.95	0	0	0	0
921	FBtr0070270	protein_coding_gene	FBgn0001189	hfw	halfway	CG3095	mRNA	FBtr0070270	hfw-RA		0	0	0	0	0	0	0	0	0	0	0	0	0	0	0	0	0	0	0	0	0	0	0	0	0	0	0	0	0	0	0	0	0	0	0	0	0	0	0
922	FBtr0333115	protein_coding_gene	FBgn0001189	hfw	halfway	CG3095	mRNA	FBtr0333115	hfw-RB		2.11	2.11	1.94	9.62	1.37	5.79	10.38	3.45	1.79	1.65	10.3	0.67	59.47	0	8.84	1.77	0.11	1.75	1.06	15.68	36.79	33.45	14.3	77.68	92.71	29.29	46.35	0.94	0.05	0.86	0.08	14.58	17.66	3.95	15.69	0.44	0	0.47	0.18
923	FBtr0085062	protein_coding_gene	FBgn0001197	His2Av	Histone H2A variant	CG5499	mRNA	FBtr0085062	His2Av-RA		190.59	294.48	307.83	252.99	14.34	52.99	59.92	221.41	43.73	130.65	59.97	19.96	13.85	9.26	199.15	49.89	21.51	45.79	80.94	26.38	193.84	205.56	148.92	139.11	410.36	161.83	93.76	151.41	199.97	160.87	133.84	112.37	28.38	32.79	76.12	121.78	33.63	35.06	10.27
924	FBtr0334311	protein_coding_gene	FBgn0001197	His2Av	Histone H2A variant	CG5499	mRNA	FBtr0334311	His2Av-RB		4.62	2.93	1.81	2.28	0.11	3.71	13.47	4.03	6.63	3.37	57.19	0.7	8.14	1.57	1.66	0	0	0.57	0.29	0.18	194.78	216.59	122.04	93.57	361.54	2.85	61.29	9.53	0	0	0	89.14	48.34	4.36	65.29	0	2.64	3.95	0.53
925	FBtr0081180	protein_coding_gene	FBgn0001202	hook	hook	CG10653	mRNA	FBtr0081180	hook-RA		41.24	41.54	39.13	41.77	0.04	31.81	52.02	41.59	70.31	22.85	21.99	40.54	13.99	12.28	104.35	111.35	12.57	25.9	0.61	20.14	12.38	33.02	14.17	10.92	8.92	180.14	6.05	47.94	44.66	45.58	7.31	28.1	58.11	0	66.12	0	62.49	40.32	41.35
926	FBtr0071511	protein_coding_gene	FBgn0001206	Hmr	Hybrid male rescue	CG1619	mRNA	FBtr0071511	Hmr-RB		11.18	13.3	11.94	6.01	0.16	17.41	12.76	13.33	12.41	8.08	1.32	1.48	0	21.74	23.06	2.06	10.81	0.58	0.16	6.9	14.53	10.75	5.69	5.94	5.84	0.33	9.88	4.02	14.26	6.89	1.13	7.31	0.45	11.53	15.43	12.58	0	0	0.13
927	FBtr0076811	protein_coding_gene	FBgn0001208	Hn	Henna	CG7399	mRNA	FBtr0076811	Hn-RA		0	0	0	0	0	0	0	0	0	0	0.67	0	0	0	0	0	0	0	0	0	0	0	0	0	0	0	0	0	0	0	0	0	0	0	0	0	0	0	0
928	FBtr0100225	protein_coding_gene	FBgn0001208	Hn	Henna	CG7399	mRNA	FBtr0100225	Hn-RB		0	0	0	0	0	0	0	0	0	0	0	0	0	0	0	0	0	0	0	0	2.2	0	0	0	0	0	0	0	0	0	0	0	0	0	0.09	0	0	0	0
929	FBtr0334645	protein_coding_gene	FBgn0001208	Hn	Henna	CG7399	mRNA	FBtr0334645	Hn-RC		0.21	0	0	0	0	0	0	0	0	0	0	0	1.15	128.97	0	0	0	0	0	0	2.93	0	0.12	0	1.21	0	4.73	0	0	0	0	1.36	0	0	0	0	0	0	0
930	FBtr0334646	protein_coding_gene	FBgn0001208	Hn	Henna	CG7399	mRNA	FBtr0334646	Hn-RD		0	0	0	0	0	0	4.06	0	0	0	0	0	0	0	0	0	0	0	0	0	4.19	0	0	0	0	0	0	0	0	0	0	0	0	0	0.5	0	0	0	0
931	FBtr0085298	protein_coding_gene	FBgn0001215	Hrb98DE	Heterogeneous nuclear ribonucleoprotein at 98DE	CG9983	mRNA	FBtr0085298	Hrb98DE-RA		27.04	1.9	119.52	0	0	0.03	0	0	0	0	12.1	0	0	0	0	0	0	0	0	0	0	204.98	23.32	9.65	43.83	0	1.14	0	0	0	0	0	60.27	0	56.12	0	0	0	0
932	FBtr0085299	protein_coding_gene	FBgn0001215	Hrb98DE	Heterogeneous nuclear ribonucleoprotein at 98DE	CG9983	mRNA	FBtr0085299	Hrb98DE-RE		35.68	43.06	27.08	0	125.34	101.67	57.57	0	5.97	24.39	46.43	23.49	596.36	0	32.68	63.97	9.78	86.83	182.6	81.42	296.11	0	114.88	451.61	816.26	71.04	63.99	0	2.24	33.18	0	78.79	0	203.77	0	30.1	16.5	16.86	12.11
933	FBtr0085300	protein_coding_gene	FBgn0001215	Hrb98DE	Heterogeneous nuclear ribonucleoprotein at 98DE	CG9983	mRNA	FBtr0085300	Hrb98DE-RB		5.34	1.04	0	0	0	6.38	0	62.53	28.14	2.95	0	0	0	0	12.8	0	0	0	0	0	0	0	0	0	0	0	0	0	0	0	0	0	0	0	6.04	0	0	0.83	0
934	FBtr0085301	protein_coding_gene	FBgn0001215	Hrb98DE	Heterogeneous nuclear ribonucleoprotein at 98DE	CG9983	mRNA	FBtr0085301	Hrb98DE-RC		50.46	86.67	31.33	212.44	19.91	0	0	176.44	20.08	71.95	91.6	0	0	272.94	93.35	27.92	0	0	0	0	0	0	67.24	0.14	139.11	0	81.05	44.66	0.73	36.95	49.95	149.92	0	0	17.99	0	0	0	0
935	FBtr0085302	protein_coding_gene	FBgn0001215	Hrb98DE	Heterogeneous nuclear ribonucleoprotein at 98DE	CG9983	mRNA	FBtr0085302	Hrb98DE-RD		299.77	384.91	253.04	0	280.57	339.74	104.03	287.07	110.27	170.2	0	110.76	0	96.98	149.54	144.07	150.74	35.17	0	148.23	0	0	0	0	0	0	0	160.73	29.97	53.66	131.74	25.09	0	379.96	22.07	462.2	0	0	0
936	FBtr0085303	protein_coding_gene	FBgn0001215	Hrb98DE	Heterogeneous nuclear ribonucleoprotein at 98DE	CG9983	mRNA	FBtr0085303	Hrb98DE-RF		23.28	19.25	5.8	78.22	90.41	0.19	96.71	0.25	17.55	42.31	16.71	0	32.61	208.31	88.64	64.39	0.1	2.28	0.27	12.04	41.15	0.81	12.05	65.75	60.28	17.58	48.16	83.67	69.89	26.55	50.07	25.79	42.2	1.2	84.36	5.22	1.95	9.74	5.28
937	FBtr0075761	protein_coding_gene	FBgn0001216	Hsc70-1	Heat shock protein cognate 1	CG8937	mRNA	FBtr0075761	Hsc70-1-RC		0.32	2.98	0.86	0	0	0	0	1.26	0	0	0	1.49	0.69	0	0	0	0	4.84	0	0	0	0	1.68	1.37	0	0	1.24	0.8	0	0	0	0	0	0	0	0	0	0	0
938	FBtr0075762	protein_coding_gene	FBgn0001216	Hsc70-1	Heat shock protein cognate 1	CG8937	mRNA	FBtr0075762	Hsc70-1-RA		3.14	3.77	0	0.25	47.49	0	0	0	2.41	2	0.57	0	2.03	0	0.31	0.4	0	0.32	0	0.19	4.79	0	0	0	0	0	0.73	1.66	0	0.32	0	0	0	0	2.39	0	0	3.16	0
939	FBtr0075763	protein_coding_gene	FBgn0001216	Hsc70-1	Heat shock protein cognate 1	CG8937	mRNA	FBtr0075763	Hsc70-1-RD		0	0.09	0	0.68	0	0	0	0	0	1.51	0.11	0	0	0	0	0	13.11	3.4	0	0	4.99	0	0	0	0	0	0.3	0	0	0	0	0.13	0.3	0	11.13	0	0	0	0
940	FBtr0082707	protein_coding_gene	FBgn0001217	Hsc70-2	Heat shock protein cognate 2	CG7756	mRNA	FBtr0082707	Hsc70-2-RA		0	0	0	0	0	0	0	0	0	0	0	0	0	0	0	0	0	0	0	0	0.07	0	0	0	0	0	0	0	0	0	0	0	0	0	0	0	0	0	0
941	FBtr0073608	protein_coding_gene	FBgn0001218	Hsc70-3	Heat shock 70-kDa protein cognate 3	CG4147	mRNA	FBtr0073608	Hsc70-3-RB		3.69	0.34	3.77	2.68	0	0.93	19.77	0	0	1.53	9.18	75.65	0	0	0	2.27	0	0	0	8.16	5.01	1.18	5.93	5.24	0	0	6.95	1.49	0	99.77	11.99	3.45	21.98	0	24.68	1.27	22.04	6.82	4.65
942	FBtr0073609	protein_coding_gene	FBgn0001218	Hsc70-3	Heat shock 70-kDa protein cognate 3	CG4147	mRNA	FBtr0073609	Hsc70-3-RA		20.32	32.46	42.26	0	0	0	5.48	76.74	60.45	42.44	7.09	0	0	0	14.97	21.59	0	0	0	0	11.38	14.58	0	0	0	0	18.57	21.93	20.47	13.02	48.38	0	0	0	2.1	0	39.93	22.13	85.15
943	FBtr0073610	protein_coding_gene	FBgn0001218	Hsc70-3	Heat shock 70-kDa protein cognate 3	CG4147	mRNA	FBtr0073610	Hsc70-3-RD		1.38	0	0.43	0	0.46	0	0	2.11	1.39	0.93	10.1	0	27.36	0	0	0	0	0	0	0	13.63	4.13	0	14.01	0	0	1.12	0.7	0.6	11.27	0.43	3.59	2.75	0	22.28	0	1.39	0	0
944	FBtr0073611	protein_coding_gene	FBgn0001218	Hsc70-3	Heat shock 70-kDa protein cognate 3	CG4147	mRNA	FBtr0073611	Hsc70-3-RC		34.58	0	0	60.89	56.04	27.46	0	9.42	0	13.98	1.42	0	43.22	74.83	0	7.66	0	0	12.61	62.06	88.31	0	0	12.67	46.04	61.6	0.09	2.47	68.67	2.94	15.98	0	64.44	97.98	0	46.48	26.45	44.29	0
945	FBtr0345166	protein_coding_gene	FBgn0001218	Hsc70-3	Heat shock 70-kDa protein cognate 3	CG4147	mRNA	FBtr0345166	Hsc70-3-RE		59.24	85.65	23.46	31.39	0.05	102.09	103.92	11.19	14.48	30.72	67.42	7.65	0.01	0.02	92.96	0	14.17	41.58	0	0.03	92.09	147.12	141.37	154.72	0.01	0.02	161.7	50.02	39.03	36.57	46.56	86.89	25.5	0.07	90.45	0.02	0.04	0	23.28
946	FBtr0087568	protein_coding_gene	FBgn0001220	Hsc70-5	Heat shock protein cognate 5	CG8542	mRNA	FBtr0087568	Hsc70-5-RA		0	0	0	0	0	0	1.59	0	0	1.23	2.91	0	0	0	0	0	0	0	0	0	1.07	35.64	0	0.93	0	0	0.65	0	0	0	0	1.73	0.56	0	2.48	0	0	0	0
947	FBtr0339969	protein_coding_gene	FBgn0001220	Hsc70-5	Heat shock protein cognate 5	CG8542	mRNA	FBtr0339969	Hsc70-5-RB		36.18	42.2	45.45	136.8	8.31	52.1	48.34	46.65	28.75	52.55	35.64	39.12	14.02	17.5	60.7	22.59	17.95	11.47	32.09	21.2	31.94	0	36	78.06	21.75	56.35	49.42	22.86	42.87	28.44	32.96	18.49	48.09	16.56	50.64	9.83	68.74	39.93	23.66
948	FBtr0086782	protein_coding_gene	FBgn0001222	Hsf	Heat shock factor	CG5748	mRNA	FBtr0086782	Hsf-RA		8.02	16.13	21.81	23.34	80.14	26.93	29.61	4.86	9.47	10.22	5.89	0	7.44	0	1.21	0	6.52	0.39	0	10.63	2.83	2.96	2.97	10.08	33.23	29	11.33	14.29	0.09	34.15	8.47	15.11	42.9	0.41	33.24	0.75	6.16	0.12	0.9
949	FBtr0110964	protein_coding_gene	FBgn0001222	Hsf	Heat shock factor	CG5748	mRNA	FBtr0110964	Hsf-RB		2.45	3.79	0.72	1.27	0	0	1.1	1.48	1.87	1.31	0.27	0	1.14	0	16.88	12.08	0.56	0	4.6	0	17.36	0	6.18	0	0	0	0	2.76	0	4.65	0.32	0	0	0	5.79	0	0	0	0
950	FBtr0110965	protein_coding_gene	FBgn0001222	Hsf	Heat shock factor	CG5748	mRNA	FBtr0110965	Hsf-RC		9.5	4	8.43	0.17	0	4.68	0.53	8.63	4.74	3.31	3.5	0	0	0	0.21	0.56	0	1.51	0	0	0	0.77	0.63	1.43	0	0	5.27	4.44	0	8.66	0	5.55	20.77	0	18.47	0	0	0	0
951	FBtr0110966	protein_coding_gene	FBgn0001222	Hsf	Heat shock factor	CG5748	mRNA	FBtr0110966	Hsf-RD		3.09	6.85	1.46	0	0	0	0	6.79	0	5.04	0.88	0	0	0	0	0	0	0	0	0	6.6	0	0	0	0	0	0	0	0	0	0	0	0	0	0	0	0	0	0
952	FBtr0100558	protein_coding_gene	FBgn0001223	Hsp22	Heat shock protein 22	CG4460	mRNA	FBtr0100558	Hsp22-RA		0.15	0.87	0.24	0.3	0.05	0	0	0.36	0.1	0.24	8.84	0.07	0.25	0.11	0.47	0.25	0	0.44	0	0	12.45	14.79	6.82	64.82	14.95	0	6.07	0.13	1	0.12	0.11	2.3	10.11	0.58	16.42	0.12	0.7	0.16	0
953	FBtr0100559	protein_coding_gene	FBgn0001223	Hsp22	Heat shock protein 22	CG4460	mRNA	FBtr0100559	Hsp22-RB		187.92	252.98	262.77	269.53	1.67	53.58	8.18	97.59	78.77	226.09	134.41	6.05	148.36	7.08	91.37	170.3	56.56	85.44	56.36	7.5	193.7	556.94	157.87	955.71	290.7	153.77	273.66	109.71	34.54	213.9	30.61	54.97	120.61	36.84	161.46	9.34	33.11	25.59	33.19
954	FBtr0076453	protein_coding_gene	FBgn0001224	Hsp23	Heat shock protein 23	CG4463	mRNA	FBtr0076453	Hsp23-RA		94.42	139.26	108.8	27.76	0	0	0	71.55	112.08	0	0	0	59.2	0	25.95	29.59	0	0	41.77	0	0	50.78	0	0	0	280.8	0	0	30.93	94.77	14.88	1.03	0	173.19	0	7.46	358.79	498.02	389.53
955	FBtr0309504	protein_coding_gene	FBgn0001224	Hsp23	Heat shock protein 23	CG4463	mRNA	FBtr0309504	Hsp23-RB		168.71	261.72	273.95	172.15	0	14.4	0	95.71	82.39	236.62	163.68	129.15	34.3	81.19	207.18	67.82	231.39	244.18	62.64	370.1	310.1	393.35	128.78	1590.39	381.64	221.66	161.86	95.05	98.14	80.45	63.54	158.05	237.5	256.66	530.62	0	63.58	225.95	312.79
956	FBtr0076496	protein_coding_gene	FBgn0001225	Hsp26	Heat shock protein 26	CG4183	mRNA	FBtr0076496	Hsp26-RA		420.9	632.95	492.03	358.26	34.26	28.69	135.06	269.52	173.53	521.83	0	214.33	253.27	65.77	777.89	237.14	0	69.16	6.24	0	0	0	0	0	572.42	1655.7	0	139.33	491.87	259.23	170.62	0	0	96.01	0	176.49	125.95	33.43	123.15
957	FBtr0346539	protein_coding_gene	FBgn0001225	Hsp26	Heat shock protein 26	CG4183	mRNA	FBtr0346539	Hsp26-RB		85.51	94.07	73.27	36.73	5.28	6.34	1.94	33.31	32.23	45.14	202.43	0	0	4.04	24.46	17.58	41.5	0	0	117.92	102.57	513.18	159.75	980.15	393.5	17.99	329.89	55.84	0	10.1	18.7	210.91	234.66	0	673.54	0	29.4	43.46	25.82
958	FBtr0076454	protein_coding_gene	FBgn0001226	Hsp27	Heat shock protein 27	CG4466	mRNA	FBtr0076454	Hsp27-RA		127.42	242.86	158.49	0	0	2.47	0	52.18	44.51	81.39	25.7	0.33	5.14	0	33.87	19.18	6.83	13.96	28.08	29.68	22.63	44.1	34.62	30.13	121.92	234.46	53.81	71.58	14.24	64.42	31.92	16.26	0	5.92	46.35	2.12	18.01	9.7	21.93
959	FBtr0346541	protein_coding_gene	FBgn0001226	Hsp27	Heat shock protein 27	CG4466	mRNA	FBtr0346541	Hsp27-RB		3.93	8.08	7.26	22.88	1.81	2.95	1.43	1.27	0.23	5.8	12.33	7.5	23.71	37.58	1.21	1.11	0.63	2	0	1.27	8.92	63.56	49.18	123.6	87.42	0	15.77	7.7	0.84	1.02	1.9	20.56	9.15	0.45	57.52	0	0	0	0.68
960	FBtr0076495	protein_coding_gene	FBgn0001227	Hsp67Ba	Heat shock gene 67Ba	CG4167	mRNA	FBtr0076495	Hsp67Ba-RA		3.1	1.2	1.43	2.16	0	0	0	0	0	2.24	6.31	6.72	0	0	3.78	0.58	17.75	16.08	0.15	12.4	50.15	85.85	8.05	1.05	0.89	0.84	4.32	3.96	0	0.07	0.13	2.37	0	0	0.85	0.14	63.09	32.88	77.57
961	FBtr0100653	protein_coding_gene	FBgn0001228	CG4456		CG4456	mRNA	FBtr0100653	CG4456-RA		0	0	0	0	0	0	0	0	0	0	0	0	0	0	0	0	0	0	0	0	0	0	0	0	0	0	0	0	0	0	0	0	0	0	0	0	0	0	0
962	FBtr0100655	protein_coding_gene	FBgn0001228	CG4456		CG4456	mRNA	FBtr0100655	CG4456-RB		0.15	0.87	0.24	0.3	0.05	0	0	0.36	0.1	0.24	8.84	0.07	0.25	0.11	0.47	0.25	0	0.44	0	0	12.45	14.79	6.82	64.82	14.95	0	6.07	0.13	1	0.12	0.11	2.3	10.11	0.58	16.42	0.12	0.7	0.16	0
963	FBtr0303473	protein_coding_gene	FBgn0001228	CG4456		CG4456	mRNA	FBtr0303473	CG4456-RC		0	0	0	0	0	0	0	0	0	0	0	0	0	0	0	0	0	0	0	0	2.24	1.61	0	0	0	0	0	0	0	0	0	0	0	0	11.88	0	0	0	0
964	FBtr0303474	protein_coding_gene	FBgn0001228	CG4456		CG4456	mRNA	FBtr0303474	CG4456-RD		0	0	0.23	0	0	0	0	0	0	0	1.14	0	0	0	0	0	0	0	0	0	15.73	19.64	0	0	0	0	0	0	0	0	0	0	0	0	31.74	0	0	0	0
965	FBtr0076497	protein_coding_gene	FBgn0001229	Hsp67Bc	Heat shock gene 67Bc	CG4190	mRNA	FBtr0076497	Hsp67Bc-RA		3.92	12.57	10.41	12.74	0	0	0	33.37	0	0.55	17.35	2.87	0	0	0.6	0	0	3.02	1	0	2.26	71.99	26.74	43.42	10.67	0	0.22	0.14	0	10.65	37.89	9.3	0.19	2.57	100.38	0	98.92	105.46	33.48
966	FBtr0084589	protein_coding_gene	FBgn0001230	Hsp68	Heat shock protein 68	CG5436	mRNA	FBtr0084589	Hsp68-RA		506.83	803.62	551.14	260.13	16.38	38.42	24.23	429.42	420.4	419.94	280.05	187.5	62	92.6	416.72	642.32	9.8	50.95	0.17	0.19	76.29	83.06	95.42	949.39	813.01	655.28	442.24	310.86	95.51	255.2	281.55	255.69	362.29	30.19	295.07	205.78	7.15	21.11	0.28
967	FBtr0073040	protein_coding_gene	FBgn0001233	Hsp83	Heat shock protein 83	CG1242	mRNA	FBtr0073040	Hsp83-RA		540.77	634.96	527.57	174.89	30.82	135.57	177.11	257.09	277.79	346.56	361.79	63.87	73.86	104.66	198.23	173.4	198.22	107.47	42.82	55.18	150.11	108.6	144.58	66.63	183.41	329.17	183.22	61.78	108.53	58.8	101.07	151.21	275.44	47.17	234.52	11.89	197.26	192.06	104.8
968	FBtr0332873	protein_coding_gene	FBgn0001233	Hsp83	Heat shock protein 83	CG1242	mRNA	FBtr0332873	Hsp83-RB		7.35	9	9.85	3.36	0.74	11.22	5.07	5.97	6.15	11.08	87.93	2.05	31.2	0	1.01	0.47	0.53	0.68	0	0	7.61	6.98	1.76	358.84	151.68	3.83	9.81	0	0	1.71	10.63	35.21	27.09	0	116.64	2.66	0	38.58	31.91
969	FBtr0084057	non_protein_coding_gene	FBgn0001234	lncRNA:Hsrω	Heat shock RNA ω	CR31400	ncRNA	FBtr0084057	lncRNA:Hsrω-RA		0	0	0	0	0	0	9.9	0	0	0	0	0	0	0	0	0.4	0	0	0	60.4	0	0	0	0	0	0	0	0	0	0	0	0	0	0	0	0	219.09	18.35	51.89
970	FBtr0084058	non_protein_coding_gene	FBgn0001234	lncRNA:Hsrω	Heat shock RNA ω	CR31400	ncRNA	FBtr0084058	lncRNA:Hsrω-RB		0	0	0	0	0	0	0	0	0	0	0	0	0	0	0	0	0	0	0	0	0	0	0	0	0	0	0	0	0	0	0	0	116.46	0	213.94	0	0.6	1.33	0
971	FBtr0084059	non_protein_coding_gene	FBgn0001234	lncRNA:Hsrω	Heat shock RNA ω	CR31400	ncRNA	FBtr0084059	lncRNA:Hsrω-RC		1412.78	1845.43	1463.9	784.62	452.54	702.89	788.59	2681.67	2555.92	1564.42	201.25	254.96	1378.44	1102.95	1647.46	899.26	0	638.41	0	0	1476.84	253.59	459.99	2666.37	2416.55	4334.51	543.97	1162.08	1084.11	1264.59	692.87	693.6	441.46	2156.55	1276.07	613.65	126.71	366.41	360.35
972	FBtr0309958	non_protein_coding_gene	FBgn0001234	lncRNA:Hsrω	Heat shock RNA ω	CR31400	ncRNA	FBtr0309958	lncRNA:Hsrω-RD		57.15	65.78	43.28	50.35	2.4	26.47	51.64	69.63	25.11	51.24	130.13	29.85	332.12	13.05	43.95	9.99	14.89	33.55	65.15	4.35	709.21	280.31	416.18	983.89	852.38	4.03	248.3	10.43	1.84	18.15	19.16	209.57	264.7	89.3	496.62	63.97	60.35	144.74	135.17
973	FBtr0332373	non_protein_coding_gene	FBgn0001234	lncRNA:Hsrω	Heat shock RNA ω	CR31400	ncRNA	FBtr0332373	lncRNA:Hsrω-RF		291.35	364.7	424.96	186.92	92.32	99	115.85	381.79	192.65	302.52	129.67	1212.7	1805.27	843.18	110.45	108.39	1105.82	790.32	2065.26	756.13	1298.8	835.56	1496.54	2278.05	3976.28	1087.06	531.83	43.42	64.1	46.28	72.13	176.26	521.81	523.32	1148.44	1219.94	3.38	6.12	9.25
974	FBtr0334316	non_protein_coding_gene	FBgn0001234	lncRNA:Hsrω	Heat shock RNA ω	CR31400	ncRNA	FBtr0334316	lncRNA:Hsrω-RG		0	0	0	0	0	0	0	0	0	0	0	0	0	0	0	0	0	0	0	0	0	0	0	0	0	0	0	0	0	0	0	0	0	0	0	0	0	0	0
975	FBtr0346801	non_protein_coding_gene	FBgn0001234	lncRNA:Hsrω	Heat shock RNA ω	CR31400	ncRNA	FBtr0346801	lncRNA:Hsrω-RH		821.16	998.55	1051.64	187.05	279.61	230.77	188.28	867.89	552.59	855.76	163.89	568.69	715.15	396.98	370.97	457.31	416.68	536.49	780.64	283.95	787.67	596.55	0	1130.13	722.3	1094.76	519.44	199.76	237.78	243.85	222.85	217	825.66	488.9	804.71	1104.08	38.34	27.51	28
976	FBtr0082255	protein_coding_gene	FBgn0001235	hth	homothorax	CG17117	mRNA	FBtr0082255	hth-RC		1.11	1.96	2.85	1.07	0.06	0	0.27	0.93	0.12	0.78	2.39	4.23	228.55	279.43	81.56	128.27	0.09	0.07	0.16	0.02	0.47	1.47	13.27	237.39	137.23	73.18	106.32	83.56	62.74	40.38	26.03	28.45	95.11	66.26	97.3	70.73	13.37	9.62	5.6
977	FBtr0082256	protein_coding_gene	FBgn0001235	hth	homothorax	CG17117	mRNA	FBtr0082256	hth-RA		1.38	4.56	1.68	0	0	0	0	0.9	4.85	2.35	7.1	0.06	21.57	206.68	123.32	78.18	0	11.97	0	0	0.66	71.51	0.55	198.39	1147.77	99.91	59.52	60.37	258.94	0	84.07	34.41	83.92	0	1.71	75.39	17.01	3.26	17.48
978	FBtr0100454	protein_coding_gene	FBgn0001235	hth	homothorax	CG17117	mRNA	FBtr0100454	hth-RE		56.79	53.5	66.2	29.23	23.95	143.07	22.93	29.15	18.5	33.54	22.59	7.95	7.26	25.91	20.14	8.74	6.9	8.3	32.44	2.95	67.57	47.11	52.87	155.17	297.96	53.48	22.87	30.7	0.85	11.74	31.42	57.41	107.76	0.92	135.89	181.18	1.47	4.09	6.34
979	FBtr0100455	protein_coding_gene	FBgn0001235	hth	homothorax	CG17117	mRNA	FBtr0100455	hth-RF		34.89	27.84	52.35	39.03	0	3.21	64.65	36.06	37.4	22.13	14.43	233.04	1143.93	1255.1	613.65	766.85	0	0	0	97.52	0	0	4.1	881.16	923.59	523.24	578.42	761.13	785.78	380.91	297.07	337.78	0	276.31	357.83	14.92	87.89	66.79	54.52
980	FBtr0344145	protein_coding_gene	FBgn0001235	hth	homothorax	CG17117	mRNA	FBtr0344145	hth-RI		36.81	40.25	44.69	64.97	77.68	28.42	15.99	20.39	8.71	13.57	27.05	84.84	1363.07	1046.92	162.83	165.88	35.88	44.4	133.77	43.52	95.22	57.29	101.85	751.16	1221.9	365.97	361.29	142.29	264.48	104.6	120	107.29	200.62	587.14	137.8	1405.83	17.78	16.94	26.51
981	FBtr0273273	protein_coding_gene	FBgn0001247	Ide	Insulin degrading metalloproteinase	CG5517	mRNA	FBtr0273273	Ide-RB		62.14	72.4	40.13	42.7	0.17	36.72	34.84	57.51	49.09	42.88	21.41	27.18	51.17	1.44	71.32	196.73	8.72	12.89	0.27	4.96	14.1	41.17	19.69	48.19	19.29	208.1	33.1	74.58	27.92	53.32	130.1	19.32	44.07	57.94	52.21	31.51	11.02	7.5	11.07
982	FBtr0076667	protein_coding_gene	FBgn0001248	Idh	Isocitrate dehydrogenase	CG7176	mRNA	FBtr0076667	Idh-RA		1.69	5.96	0.79	0	0.84	13.1	27.21	0	9.07	4.56	29.7	0	0	0	2.57	0.57	24.35	29.46	14.66	0	4.01	4.16	0	0	1.43	0	57.99	21.21	0	23.77	50.19	22.45	0	6.38	10.43	0	23.89	15.11	23.91
983	FBtr0076668	protein_coding_gene	FBgn0001248	Idh	Isocitrate dehydrogenase	CG7176	mRNA	FBtr0076668	Idh-RF		0	0	0	0	0	0	0	0	0	0	0	0	0	0	0	0	0	0	0	0	0	0	0	0	0	0	0	0	0	0	0	0	0	0	0	0	0	0	0
984	FBtr0076669	protein_coding_gene	FBgn0001248	Idh	Isocitrate dehydrogenase	CG7176	mRNA	FBtr0076669	Idh-RB		5.48	5.66	6.86	63.12	0	0	0	3.89	1.91	0	3.62	0	0	0	6.92	0	0	2	0	0	0	1.43	0	1.99	0	0	4.14	104.61	14.98	0	0	5.24	8.63	0	4.79	0	0	0	0
985	FBtr0076670	protein_coding_gene	FBgn0001248	Idh	Isocitrate dehydrogenase	CG7176	mRNA	FBtr0076670	Idh-RC		0	0	0	0	0	0	0	0	0	0.35	1.85	0	0	0	0	0	0	3.49	1.09	0	0.31	1.07	0	0	0	0	0	0	0	4.85	0	0	0	0	0	0	4.79	0	0
986	FBtr0076671	protein_coding_gene	FBgn0001248	Idh	Isocitrate dehydrogenase	CG7176	mRNA	FBtr0076671	Idh-RD		0	0	0	0	0	0	24.05	0	0	0	0	0.17	0	0.41	0	0	0	0	0	0	0	0	0.19	0	0	0	0	0.59	0.23	0	1.34	0	0	0	0	0	0	0	0
987	FBtr0076673	protein_coding_gene	FBgn0001248	Idh	Isocitrate dehydrogenase	CG7176	mRNA	FBtr0076673	Idh-RG		0	0	0	1.13	0.96	0	0	0	0	0	0.8	0	0	0	1.91	1.15	0	0	0	0	0	0	0.24	0.42	0	0	0	0	0.18	0	0	0	0	0	2.76	0	0	0	0
988	FBtr0114548	protein_coding_gene	FBgn0001248	Idh	Isocitrate dehydrogenase	CG7176	mRNA	FBtr0114548	Idh-RI		0	0	0	0	0	0	0	0	7.62	0	0	0	0	0	0	0	0	0	0	0	0	0	0	0	0	0	0	0	0	0	0.94	0	0	0	0	0	0	0	0
989	FBtr0114549	protein_coding_gene	FBgn0001248	Idh	Isocitrate dehydrogenase	CG7176	mRNA	FBtr0114549	Idh-RJ		0.51	0	0	1.46	0	0	0	7.36	0	0	0.59	0	0	0	0	0	0	0	0	0	0	0	0	0	0	0	0	0	0	0	0	0	0	0	0	0	0	0	0
990	FBtr0333058	protein_coding_gene	FBgn0001248	Idh	Isocitrate dehydrogenase	CG7176	mRNA	FBtr0333058	Idh-RK		0	0	0	0	0	0	0	0	0	0	0	0	0	0	0	0	0	0	0	0	0	0	0	0	0	0	0	0	0	0	0	0	0	0	0	0	0	0	0
991	FBtr0074357	protein_coding_gene	FBgn0001250	if	inflated	CG9623	mRNA	FBtr0074357	if-RB		0	0	0	0	0	0	0	0	0	0	0	0	0	0	0	0	0	0	0	0	0	0	0	0	0	0	0	0	0	0	0	0	0	0	0	0	0	0	0
992	FBtr0301352	protein_coding_gene	FBgn0001250	if	inflated	CG9623	mRNA	FBtr0301352	if-RC		0	0.61	0.04	0	0	0	0	0	0	0	4.07	0	0	0	0	0	0	0.09	0	0	0	0	0.97	0	0	0	0.64	0	0	0	0	1.4	2.87	0	10.69	0	0	0.45	0
993	FBtr0301353	protein_coding_gene	FBgn0001250	if	inflated	CG9623	mRNA	FBtr0301353	if-RD		0	0	0	0	0	0	0	0	0	0	0	0	0	0	0	0	0	0	0	0	0	0	0	0	0	0	0	0	0	0	0	0	0	0	0	0	0	0	0
994	FBtr0301354	protein_coding_gene	FBgn0001250	if	inflated	CG9623	mRNA	FBtr0301354	if-RF		0.03	0	0	0	0	0	0	0	0	0	0.51	0	0	0	0	0	0	0	0	0	0.13	0	0.24	0	0	0	0	0	0	0	0	0	0	0	0	0	0	0	0
995	FBtr0076606	protein_coding_gene	FBgn0001253	ImpE1	Ecdysone-inducible gene E1	CG32356	mRNA	FBtr0076606	ImpE1-RA		0	0	0	0	0	0	0	0	0	0	20.56	0	0	0	0	0	0	0	0	0	0.79	0.02	20.37	0.07	0.12	0	0.02	0	0	0	0	15.9	0.69	0	0	0	0	0	0.05
996	FBtr0076607	protein_coding_gene	FBgn0001253	ImpE1	Ecdysone-inducible gene E1	CG32356	mRNA	FBtr0076607	ImpE1-RB		0	0	0	0	0	0	0	0	0	0	0	0	0	0	0	0	0	0	0	0	0	0	0	0	0	0	0	0	0	0	0	0	0	0	0	0	0	0.84	0
997	FBtr0333057	protein_coding_gene	FBgn0001253	ImpE1	Ecdysone-inducible gene E1	CG32356	mRNA	FBtr0333057	ImpE1-RC		0	0	0	0	0	0	0	0	0	0	7.12	0	0	0	0	0	0	0	0	0	0	0	0	0	0	0	0	0	0	0	0	0	0	0	0	0	0	0.06	0
998	FBtr0073141	protein_coding_gene	FBgn0001254	ImpE2	Ecdysone-inducible gene E2	CG1934	mRNA	FBtr0073141	ImpE2-RA		0.43	0.65	0.36	1.25	0	0	47.18	1.74	0	0	0	0	0	0	0	0	0	0	0	0	0	0	0	0	0	0	0	0	0	0	0	0	0	0.35	0.24	0	0	0	0
999	FBtr0310412	protein_coding_gene	FBgn0001255	ImpE3	Ecdysone-inducible gene E3	CG2723	mRNA	FBtr0310412	ImpE3-RB		2.25	0.32	1.18	7.96	0	0.6	0	7.75	0.3	0.24	0.21	0	0	0	0	0	0	0	0	0	6.86	0.72	0.65	1.93	0	0	0	2.51	0	0	0	0.17	9.63	0	2.99	0	0	0	0
1000	FBtr0075842	protein_coding_gene	FBgn0001256	ImpL1	Ecdysone-inducible gene L1	CG10717	mRNA	FBtr0075842	ImpL1-RA		0	0	0	0	0	0	0	0	0	0	0.1	0	0	0	0	0	0	0	0	0	0	0	0	0	0	0	0	0	0	0	0	0	0	0	0	0	0	0	0
1001	FBtr0075843	protein_coding_gene	FBgn0001256	ImpL1	Ecdysone-inducible gene L1	CG10717	mRNA	FBtr0075843	ImpL1-RB		0	0	0	0	0	0	0	0	0	0	0.16	0	0	0	0	0	0	0	0	0	0	0	0	0	0	0	0	0	0	0	0	0	0	0	0	0	0	0	0
1002	FBtr0301405	protein_coding_gene	FBgn0001256	ImpL1	Ecdysone-inducible gene L1	CG10717	mRNA	FBtr0301405	ImpL1-RC		0	0	0	0	0	0	0	0	0.09	0	0.19	0	0	0	0	0	0	0	0	0	0	0	0	0	0	0	0	0	0	0	0	0	0	0	0	0	0	0	0
1003	FBtr0073248	protein_coding_gene	FBgn0001257	ImpL2	Ecdysone-inducible gene L2	CG15009	mRNA	FBtr0073248	ImpL2-RA		0	0	0	0	0	0	0	0	0	0	0.16	0.39	0	0	0	0	0	0	0	0	0	0.14	0	0	0	0	3.38	0	0	0	0	0	0	0	0	0	0	0	0
1004	FBtr0073249	protein_coding_gene	FBgn0001257	ImpL2	Ecdysone-inducible gene L2	CG15009	mRNA	FBtr0073249	ImpL2-RB		0	0	0	0	0	0	0	0	0	0	0	0	0	0	0	0	0	0	0	0	0	0	0	0	0	0	0	0.04	0	0	0	4.09	0	0.06	0	0	0	0	0
1005	FBtr0073250	protein_coding_gene	FBgn0001257	ImpL2	Ecdysone-inducible gene L2	CG15009	mRNA	FBtr0073250	ImpL2-RC		0	0	0	0	0	0	0	0.67	7.16	0	0	0	0	0	0	0	0	1.02	0	0	0	0.72	0	0	0	0	0	0	0	0	0	0	0	0	0	0	0	0	0
1006	FBtr0333569	protein_coding_gene	FBgn0001257	ImpL2	Ecdysone-inducible gene L2	CG15009	mRNA	FBtr0333569	ImpL2-RD		0.13	0.05	0.2	0	0	0	0	0.3	0	0	5.71	70.21	0	0	0	0	0	0.54	0	0	1.56	0.53	2.9	1.5	0	0	6.94	0	0	0	0	0.45	1.42	0	0.74	13.35	0	0	0
1007	FBtr0077008	protein_coding_gene	FBgn0001258	Ldh	Lactate dehydrogenase	CG10160	mRNA	FBtr0077008	Ldh-RA		0	0.45	0	0	0	0	0.08	0	0	0	0	0	0	0	0	0	0	0	0	0	0	0	0	0	0	0	0	0	0	0	0	0	0	0	0	0	0	0	0
1008	FBtr0332065	protein_coding_gene	FBgn0001258	Ldh	Lactate dehydrogenase	CG10160	mRNA	FBtr0332065	Ldh-RB		1.68	1.04	0	0	0	0	0	0	0	0	1.05	6.85	0	0	0	0	0	0	0.26	0	0	0	0.22	0.51	0.09	0	0	0	0	0	0	0	0	0	0	0	0	0	0
1009	FBtr0332066	protein_coding_gene	FBgn0001258	Ldh	Lactate dehydrogenase	CG10160	mRNA	FBtr0332066	Ldh-RC		0	2.59	0.95	0	0	0	0	0	0	0	0.19	0	0	0	0	0	0	0	0.16	0	0	0	0	0	0	0	0	0	0	0	0	0	0.1	0	0	0	0	0	0
1010	FBtr0332067	protein_coding_gene	FBgn0001258	Ldh	Lactate dehydrogenase	CG10160	mRNA	FBtr0332067	Ldh-RD		0	0	0	0	0	0	0	0	0	0	0	0	0	0	0	0	0	0	0	0	0	0	0	0	0	0	0	0	0	0	0	0	0	0	0	0	0	0	0
1011	FBtr0078183	protein_coding_gene	FBgn0001259	in	inturned	CG16993	mRNA	FBtr0078183	in-RA		4.83	1.92	0.69	0	0	0	0.39	0.09	0	5.17	0.02	0	0.06	0	0	5.84	0	0	0	0	0	1.1	0	0.1	0	0	4.73	0	0	0	0	0	0	3.46	0	0	0	0	0
1012	FBtr0071909	protein_coding_gene	FBgn0001263	inaD	inactivation no afterpotential D	CG3504	mRNA	FBtr0071909	inaD-RA		0	0.28	0	0	0	0	0	0	0	0.11	1.13	0	0	0	0.52	0	0	0	0	0	0	0	0.25	0	0	0	0	0.06	0	0	0	0.05	0	0	0	0	0	0	0
1013	FBtr0305132	protein_coding_gene	FBgn0001263	inaD	inactivation no afterpotential D	CG3504	mRNA	FBtr0305132	inaD-RB		0	0	0	0	0	0	0	0	0	0	0	0	6.59	0	0	0	0	0	0	0	5.19	0	0	0	0	0	0	0	0	0	0	0	0	0	0	0	0	0	0
1014	FBtr0088068	protein_coding_gene	FBgn0001269	inv	invected	CG17835	mRNA	FBtr0088068	inv-RD		0	0	0	0	0	0	0	0	0	0	0	0	0	0	0	0	0	0	0	0	0.12	0	0	0	0	0	0	0	0	0	0	0	0	0	0	0	0	0	0
1015	FBtr0088069	protein_coding_gene	FBgn0001269	inv	invected	CG17835	mRNA	FBtr0088069	inv-RB		0	0	0	0	0	0	0	0	0	0	0	0	0	0	0	0	0	0	0	0	0	0	0	0	0.13	0	0	0	0	0	0	0	0	0	0	0	0	0	0
1016	FBtr0345673	protein_coding_gene	FBgn0001269	inv	invected	CG17835	mRNA	FBtr0345673	inv-RE		0	0	0	0	0	0	0	0	0	0	0	0	0	0	0	0	0	0	0	0	0	0	0	0	0	0	0	0	0	0	0	0	0	0	0	0	0	0	0
1017	FBtr0088154	protein_coding_gene	FBgn0001276	ix	intersex	CG13201	mRNA	FBtr0088154	ix-RA		19.87	9.94	3.3	0.32	0	111.74	135.31	7.3	12.74	8.17	11.68	0	0	0	0	0	3.1	2.82	81	0	69.36	0	4.61	7.47	0	0	5.94	6.36	0	0.74	0.68	0.66	33.8	0	8.83	0	14.15	19.91	21.06
1018	FBtr0085595	protein_coding_gene	FBgn0001280	janA	janus A	CG7933	mRNA	FBtr0085595	janA-RC		0	12.02	0	0	0	0	0	2.04	0	0	17.23	0	0	0	0	0	0	0	0	0	0	0	0	52.88	0	0	0	0	0	0	0	0	0	0	0	0	81.5	94.73	79.33
1019	FBtr0085596	protein_coding_gene	FBgn0001280	janA	janus A	CG7933	mRNA	FBtr0085596	janA-RB		0	2.26	0	0	0	0	0	0	0	0	4.44	0	0	0	14.67	0	0	0	0	0	0	0	0	0	0	0	0	0.47	0	70.87	0	3.17	0	0	0	0	1.77	0	0
1020	FBtr0085597	protein_coding_gene	FBgn0001280	janA	janus A	CG7933	mRNA	FBtr0085597	janA-RA		3.24	0	2.85	114.07	0.18	60.17	0	0	0	0.45	0	5.18	0	0	11.15	8.55	0	0	0	0	0	0	0	0	0	0	0	9.49	0	0	0.57	57.63	0	0	0	0	54.61	3.43	0
1021	FBtr0085598	protein_coding_gene	FBgn0001281	janB	janus B	CG7931	mRNA	FBtr0085598	janB-RA		0	0	0	1.12	0	0	0	0	0	0	0	0	0	0	0	0.27	0	0	0	0	0	0	0	0	0	0.45	0	0	0	0	0	7.04	0	0	0	0	0	0	0
1022	FBtr0088704	protein_coding_gene	FBgn0001285	Jon44E	Jonah 44E	CG8579	mRNA	FBtr0088704	Jon44E-RA		0	0	0	0	0	0	0	0	0	0	0	0	0	0	0	0	0	0	0	0	0	0	0	0	0	0	0	0	0	0	0	0	0	0	0	0	0	0	0
1023	FBtr0345661	protein_coding_gene	FBgn0001285	Jon44E	Jonah 44E	CG8579	mRNA	FBtr0345661	Jon44E-RB		0	0	0	0	0	0	0	0	0	0	0	0	0	0	0	0	0	0	0	0	0	0	3.97	0	0	0	0	0	0	0	0	0	0	0	0	0	0	0	0
1024	FBtr0088410	protein_coding_gene	FBgn0001291	Jra	Jun-related antigen	CG2275	mRNA	FBtr0088410	Jra-RB		0	0	0	0	0	0	0	0	0	0	2.21	0	0	0	0	0	0	0	0	1.09	45.45	0.27	0	9.93	0	0	0.39	0	0	0	0	0	0	0	4.6	0	0	0	0
1025	FBtr0088411	protein_coding_gene	FBgn0001291	Jra	Jun-related antigen	CG2275	mRNA	FBtr0088411	Jra-RA		3.01	8.74	15.77	0.64	0	2.94	7.06	8.77	30.85	7.03	3.57	0.05	0	0	5.66	0.5	0.59	0	0	0	6.83	30.84	8.99	1.01	4.42	2.2	6.46	63.89	0	1.62	0.21	0	37.04	0.13	2.91	0	5.11	4.52	2.87
1026	FBtr0330606	protein_coding_gene	FBgn0001291	Jra	Jun-related antigen	CG2275	mRNA	FBtr0330606	Jra-RC		3.01	8.74	15.77	0.64	0	2.94	7.06	8.77	30.85	7.03	3.57	0.05	0	0	5.66	0.5	0.59	0	0	0	6.83	30.84	8.99	1.01	4.42	2.2	6.46	63.89	0	1.62	0.21	0	37.04	0.13	2.91	0	5.11	4.52	2.87
1027	FBtr0082666	protein_coding_gene	FBgn0001296	kar	karmoisin	CG12286	mRNA	FBtr0082666	kar-RA		0.53	0.96	0.05	0.23	0	0	0.31	0.94	0.24	0.28	2.64	0	0	0	0.26	0.11	0	0.04	1.37	0	0	0	0.71	0	0	0	0.06	0	0	0	0	0.18	5	0	0	0	0.56	4.25	2.2
1028	FBtr0302563	protein_coding_gene	FBgn0001296	kar	karmoisin	CG12286	mRNA	FBtr0302563	kar-RB		0.97	0.6	1.59	0	0	0	0	0	0	0	0.35	0	0	0	0.79	0	0.12	0	0	0	1.91	0	0	0.14	0	0	0.63	0	0	0	0	0.08	1.47	0	1.92	0	0	0	0
1029	FBtr0099988	protein_coding_gene	FBgn0001297	kay	kayak	CG33956	mRNA	FBtr0099988	kay-RD		0	3.2	0	0	0	0	0	0	0.03	0.05	0.09	0	0.08	0	7.98	0	0.05	0	0	0	3.17	0	8.07	4.49	0	7.47	0.28	9.11	0	0	0	13.96	1	0	0	0	0	0	0
1030	FBtr0099989	protein_coding_gene	FBgn0001297	kay	kayak	CG33956	mRNA	FBtr0099989	kay-RA		5.96	4.17	1.1	4.03	0.99	0	2.09	4.51	0.09	12.08	2.95	0.98	5.91	1.06	0.68	0.64	0.06	3.45	0	3.67	1.78	0.52	0.39	23.3	0	36.96	1.8	3.07	17.85	0.31	7.2	10.53	34.66	0	13.85	0	0	0	0.17
1031	FBtr0099990	protein_coding_gene	FBgn0001297	kay	kayak	CG33956	mRNA	FBtr0099990	kay-RB		4.09	3.36	3.8	0.25	0	26.33	0.35	3.09	2.23	2.38	2.76	11.5	5.01	8.77	3.02	5.47	2.49	0	11.25	28.56	14.59	24.19	2.54	2.63	5.3	7.07	19.07	0.28	1.75	0.8	1.53	1.5	11.15	0	26.35	36.21	0.65	2.47	0
1032	FBtr0290076	protein_coding_gene	FBgn0001297	kay	kayak	CG33956	mRNA	FBtr0290076	kay-RF		4.72	17.51	26.01	0.43	1.73	2.24	0.3	15.46	4.01	7.19	16.61	32.23	0.55	6.45	2.51	11.9	0	0.81	4.5	0	32	4.84	24.03	13.94	24.61	2.9	12.75	2.34	7.9	15.45	12.9	29.89	30.7	98.58	31.55	71.96	2.35	0.21	0
1033	FBtr0339165	protein_coding_gene	FBgn0001297	kay	kayak	CG33956	mRNA	FBtr0339165	kay-RG		0.16	1.72	0	0	0	0	0	0.74	0	0	0.34	0	0	0	0.81	0	0	0	0	0.84	0	0	0	0	0	0	0	0.77	0	0	2.56	0	0	0	1.58	0	0	0	0
1034	FBtr0081042	protein_coding_gene	FBgn0001301	kel	kelch	CG7210	mRNA	FBtr0081042	kel-RA		13.51	11.27	10.52	1.32	1.14	7.25	5.46	12.03	3.51	9.74	3	1.1	4.7	0.35	9.37	21.98	0.97	5.56	6.82	4.48	7.89	17.02	4.82	16.13	0.92	1.51	5.23	4.11	5.19	9.2	7.44	6.66	14.72	4.94	10.71	3.82	0.18	0.72	1.62
1035	FBtr0081043	protein_coding_gene	FBgn0001301	kel	kelch	CG7210	mRNA	FBtr0081043	kel-RB		13.51	11.27	10.52	1.32	1.14	7.25	5.46	12.03	3.51	9.74	3	1.1	4.7	0.35	9.37	21.98	0.97	5.56	6.82	4.48	7.89	17.02	4.82	16.13	0.92	1.51	5.23	4.11	5.19	9.2	7.44	6.66	14.72	4.94	10.71	3.82	0.18	0.72	1.62
1036	FBtr0087184	protein_coding_gene	FBgn0001308	Khc	Kinesin heavy chain	CG7765	mRNA	FBtr0087184	Khc-RA		17.85	24.64	20.22	13	0.08	22.24	11.39	24.79	4.43	18.57	18.81	8.1	3.81	11.74	17.72	23.82	11.31	8.4	5.03	61.05	43.42	11.85	3.6	13.01	1.97	0	6.62	25.32	12.94	39.52	32.18	28.57	26.14	3.63	11.1	29.12	11.45	7.77	19.95
1037	FBtr0078798	protein_coding_gene	FBgn0001311	kkv	krotzkopf verkehrt	CG2666	mRNA	FBtr0078798	kkv-RA		0.25	0.04	0.17	0	0.89	0	0	0	0.14	0.09	0.02	0	0	0	0	0.45	0	0	0	0	0	0	0.06	0	0	0	0	0.2	0	0	0	0	0.02	0.07	0	0	0	0	0
1038	FBtr0078800	protein_coding_gene	FBgn0001311	kkv	krotzkopf verkehrt	CG2666	mRNA	FBtr0078800	kkv-RC		0	0	0	0.01	0	0	0	0	0.33	0	0	0.07	0	0	0	0	0	0	0	0	0.02	0	0	0.13	0	0	0	0	0	0.52	0	0	0	0	0.39	0	0	0	0
1039	FBtr0301398	protein_coding_gene	FBgn0001311	kkv	krotzkopf verkehrt	CG2666	mRNA	FBtr0301398	kkv-RD		0	0	0	0.01	0	0	0	0	0.33	0	0	0.07	0	0	0	0	0	0	0	0	0.02	0	0	0.13	0	0	0	0	0	0.52	0	0	0	0	0.39	0	0	0	0
1040	FBtr0346722	protein_coding_gene	FBgn0001313	kl-2	male fertility factor kl2	CG17866	mRNA	FBtr0346722	kl-2-RD		0	0	0	0	0	0	0	0	0	0	0	0	0	0	0	0	0	0	0	0	0	0	0	0	0	0	0	0	0	0	0	0	0	0	0	0	0	0	0
1041	FBtr0072565	protein_coding_gene	FBgn0001316	klar	klarsicht	CG17046	mRNA	FBtr0072565	klar-RA		4.2	3.88	0	0.62	0	0	0	1.42	0	0.72	0.1	0	0	0	0	9.16	0	0	0	19.5	0	0.27	0	0	0	0	0	0	0	0	2.74	0	0	0	0	0	0	0	0
1042	FBtr0110818	protein_coding_gene	FBgn0001316	klar	klarsicht	CG17046	mRNA	FBtr0110818	klar-RB		14.76	19.17	23.11	19.98	10.24	5.13	27.14	4.39	0.79	1.21	4.57	11.24	21.66	0.71	0.39	3.52	0.52	1.14	1.2	1.41	16.88	2.97	12.59	0.56	2.02	0	12.55	6.11	24.52	3.67	27.26	1.35	13.99	21.25	13.59	8.14	0.97	1.71	4.26
1043	FBtr0112807	protein_coding_gene	FBgn0001316	klar	klarsicht	CG17046	mRNA	FBtr0112807	klar-RC		3.7	3.25	1.27	17.1	0.28	0.96	25.32	3.15	0	0.12	1.47	0.11	12.57	0	0	0	0	0.51	0	0	0.17	0	0	2.87	0	0	1.95	0.22	0	0.22	7.8	0.16	1.1	40.1	0.65	0	2.51	0	0
1044	FBtr0112808	protein_coding_gene	FBgn0001316	klar	klarsicht	CG17046	mRNA	FBtr0112808	klar-RD		1.34	0.73	0	0	0	0.15	0.42	2.51	0	5.07	0.43	1.71	1.51	0	0	0	0	0	10.42	0	1.51	2.94	3.09	0	0	0	0	0.25	3.13	6.96	6.18	4.01	2.6	0	0	0	0	0	0
1045	FBtr0333850	protein_coding_gene	FBgn0001316	klar	klarsicht	CG17046	mRNA	FBtr0333850	klar-RE		5.15	15.75	4.63	0.33	20.62	0	0	3.37	0.45	1.26	0.42	0.04	2.13	0	11.54	0	0.28	4.75	0	0	4.03	0	0.3	0	0.03	0	2.2	0.87	0	11.18	0	1.04	0.33	0	0	1.09	0	0.13	0
1046	FBtr0333851	protein_coding_gene	FBgn0001316	klar	klarsicht	CG17046	mRNA	FBtr0333851	klar-RF		27.2	36	43.58	2.68	1.95	0	0	1.26	1.75	0.84	0.09	0	0	0.04	0.71	0.09	0	4.34	0	0	0	0	0	0	0	0	0	0	0	0	0.08	0	0	0	0	0	0	0	0
1047	FBtr0333852	protein_coding_gene	FBgn0001316	klar	klarsicht	CG17046	mRNA	FBtr0333852	klar-RG		1.24	1.53	1.65	0.19	0.21	0	1.39	0.57	4.69	0.23	0	2.04	0.72	0	0	0	0	0.16	0	1.99	0.84	0	0.04	0	0	0	0.96	0.16	0	0	0	0.16	0.22	0.04	0	0	0	0	0
1048	FBtr0343526	protein_coding_gene	FBgn0001316	klar	klarsicht	CG17046	mRNA	FBtr0343526	klar-RH		13.31	5.86	5.8	0	0	0.08	1.49	4.05	0	4.26	0.1	0	0	0	0	0	0	0	0	0	0.31	0	0.18	8.25	0	0	0.1	0.6	0	0.06	0	0.07	2.98	0	1.89	0	0	0	0
1049	FBtr0343527	protein_coding_gene	FBgn0001316	klar	klarsicht	CG17046	mRNA	FBtr0343527	klar-RI		2.09	0.31	2.44	16.07	67.72	0	0	0	5.93	0.18	0	0.06	0	127.76	1.11	3.77	13.89	4.67	0	0	0	0	0	5.51	5.43	5.78	0	0	0	0	0	0	0	0	0	0	0.32	0.39	5.54
1050	FBtr0087465	protein_coding_gene	FBgn0001319	kn	knot	CG10197	mRNA	FBtr0087465	kn-RA		0	0	0	0	0	0	0	0	0	0	0	0	0	0	0	0	0	0	0	0	0	0	0	0	0	0	0	0	0	0	0	0	0.29	0	0	0	0	0	0
1051	FBtr0112809	protein_coding_gene	FBgn0001319	kn	knot	CG10197	mRNA	FBtr0112809	kn-RB		0	0	0	0	0	0	0	0	0	0	2.89	0	0	0	0	0	0	0	0	0	0	0	6.89	0	0.34	0	0	0	0	0	0	0.13	3.27	0	0.17	0	0	0	0
1052	FBtr0112810	protein_coding_gene	FBgn0001319	kn	knot	CG10197	mRNA	FBtr0112810	kn-RC		0	0	0	0	0	0	0	0	0	0	0	0	0	0	0	0	1.42	0	0	0	0	0	0	0	0	0	0	0	0	0	0	0	0	0	0	0.21	0	0	0
1053	FBtr0301400	protein_coding_gene	FBgn0001319	kn	knot	CG10197	mRNA	FBtr0301400	kn-RD		0	0	0	0	0	0	0	0	0	0	0	0	0	0	0	0	0	0	0	0	0	0	0.1	0	0	0	0	0	0	0	0	0	0	0	0	0	0	0	0
1054	FBtr0329882	protein_coding_gene	FBgn0001319	kn	knot	CG10197	mRNA	FBtr0329882	kn-RE		0.07	0	1.32	0	0	0	0	0	0	0.04	0.81	0.05	0	0	0	0	0	0	0	0	0	0	0	0.1	0	0	0	0	0	0	0	0	0	0	1.06	0	0	0	0.11
1055	FBtr0078283	protein_coding_gene	FBgn0001320	kni	knirps	CG4717	mRNA	FBtr0078283	kni-RA		0	0	0	0	0	0	0	0	0	0	0	0	0	0	0	0	0	0	0	0	0	0	0	0	0	0	0	0	0	0	0	0	0	0	0	0	0	0	0
1056	FBtr0344836	protein_coding_gene	FBgn0001320	kni	knirps	CG4717	mRNA	FBtr0344836	kni-RB		0	0	0	0	0	0	0	0	0	0	0.08	0	0	0	0	0	0	0	0	0	0	0	0	0	0	3.51	0	0	0	0	0	0	0	0	0	0	0	0	0
1057	FBtr0082194	protein_coding_gene	FBgn0001321	knk	knickkopf	CG6217	mRNA	FBtr0082194	knk-RA		0.69	0.48	0.71	0.18	0	0	7.61	0.16	0	0.54	0.59	0	0	0	14.66	0	0	0.81	0	0	0.21	0	0.39	0.86	0	0	0	0	0	0.04	0	0	0.04	0	0	0	0	0	0
1058	FBtr0078212	protein_coding_gene	FBgn0001323	knrl	knirps-like	CG4761	mRNA	FBtr0078212	knrl-RA		0	0	0	0	0	0	0	0	0	0	0	0	0	0	0	0	0	0	0	0	0	0	0	0	0	0	0	0	0	0	0	0	0	0	0	0	0	0	0
1059	FBtr0346815	protein_coding_gene	FBgn0001323	knrl	knirps-like	CG4761	mRNA	FBtr0346815	knrl-RB		0	0	0	0	0	0	0	0	0	0	0	0	0	0	0	0	0	0	0	0	0	0	0	0	0	0	0	0	0	0	0	0	0	0	0	0	0	0	0
1060	FBtr0074884	protein_coding_gene	FBgn0001324	kto	kohtalo	CG8491	mRNA	FBtr0074884	kto-RA		8.03	9.25	6.38	5.05	0.8	1.76	5.37	8.18	4.12	9.68	1.6	1.2	0.45	14.58	3.93	25.1	0.02	1.37	1.84	0.86	6.65	5.38	0	0.88	0	19.72	0.88	7.89	11.1	5.81	2.74	4.89	0.02	0	0.82	0.49	0	0.15	0
1061	FBtr0304716	protein_coding_gene	FBgn0001324	kto	kohtalo	CG8491	mRNA	FBtr0304716	kto-RB		0	0	0	0.5	1.97	0	0	0	0	1.08	0	0	6.45	0	6.01	0	0.06	0	0	7.5	0	0	1.24	0.5	0	0	0	0	0	0	71.06	0	3.24	0	0	0	0	1.7	0.38
1062	FBtr0072449	protein_coding_gene	FBgn0001325	Kr	Kruppel	CG3340	mRNA	FBtr0072449	Kr-RA		0.93	0	0	0	0	0	0	0	1.36	0	0.49	0	0	0	0	0.19	0	0	0	0	0.06	0	0	0.06	0	0	0.35	0	0	0	0	0	0	0	0	0	0	0	0
1063	FBtr0333162	protein_coding_gene	FBgn0001325	Kr	Kruppel	CG3340	mRNA	FBtr0333162	Kr-RB		0	0.14	0	0	0	0	0.93	0.38	0	1.74	0.11	3.04	0	0	0	0	0	0	0	0	0	0.34	2.45	0	0	0	0	0	0	0	0	0	0.25	0	0.98	0	0	0	0
1064	FBtr0070419	protein_coding_gene	FBgn0001330	kz	kurz	CG3228	mRNA	FBtr0070419	kz-RA		0	0	1.1	0.03	0	0.84	0.06	0	0	0	0.5	0	0	0	0	0.25	0	0.26	0	0	0	0.63	0.26	0	0	0	0.69	1.91	0	0	0	0	0	0	0	0	0	0	0.33
1065	FBtr0342769	protein_coding_gene	FBgn0001330	kz	kurz	CG3228	mRNA	FBtr0342769	kz-RB		0.75	1.08	0	0	0	0	0	2.49	0.32	2.41	0	0	0	0	1.18	0	3.31	0	0	0	0	0.79	0	0	0.04	0	0	0	0	0	1.42	0	0	0	0	0	1.23	0	0
1066	FBtr0070119	protein_coding_gene	FBgn0001341	Mybbp1A	MYB binding protein 1a	CG6189	mRNA	FBtr0070119	Mybbp1A-RA		7.19	6.56	5.36	0	39.83	0.55	6.12	5.02	4.56	1.2	0.72	14.8	0	0	9	35.86	3.81	0	0	0.15	0	0	9.65	0	0	26.94	0	3.75	0.07	0.24	13.61	1.17	0.4	0	1.02	0.06	2.19	0	0
1067	FBtr0070439	protein_coding_gene	FBgn0001404	egh	egghead	CG9659	mRNA	FBtr0070439	egh-RC		71.64	69.43	72.39	11.38	1.14	22.63	8.84	52.16	58.55	74.31	28.13	4.36	153.64	17.22	45.16	11.8	210.53	59.89	139.57	91.29	49.62	63.86	91.37	53.29	7.32	71.99	119.07	7.4	62.21	9.6	45.63	40.47	91.38	1.67	30.33	136.25	20.19	6.88	13.55
1068	FBtr0070440	protein_coding_gene	FBgn0001404	egh	egghead	CG9659	mRNA	FBtr0070440	egh-RB		156.89	221.65	173.8	242.17	292.29	371.61	144.5	252.55	115.84	178.83	34.24	65.6	108.79	314.9	125.84	208.91	43.11	153.56	57.67	35.02	79.61	72.81	149.26	197.41	357.67	37.3	95.58	90.97	96.94	78.73	73.45	53.15	169.98	252.6	84.75	532.46	27.62	9.12	20.95
1069	FBtr0340091	protein_coding_gene	FBgn0001404	egh	egghead	CG9659	mRNA	FBtr0340091	egh-RD		0	0.7	3.93	0	0	37.61	0	0	0.19	0.19	0.15	0.3	0	0	0.56	0	0	0	0	0	0	0	0	0	0	0	0	1.09	0	0	0	0	0	51.94	1.74	0	0	0	0
1070	FBtr0073460	protein_coding_gene	FBgn0001491	l(1)10Bb	lethal (1) 10Bb	CG1639	mRNA	FBtr0073460	l(1)10Bb-RA		6.05	4.17	6.62	1.3	1.85	0	0.27	1.73	18.26	8.04	7.59	0	0	0	0	6.01	2.13	0	17.61	1.63	35.69	2.82	3.04	32.81	0	10.38	2.27	2.87	2.22	0.41	0.44	11.16	22.54	0	3.63	0	18.05	31.21	22.12
1071	FBtr0077221	protein_coding_gene	FBgn0001565	Hlc	Helicase	CG1666	mRNA	FBtr0077221	Hlc-RA		7.53	0.66	13.76	0	10	1.6	0	22.73	1.26	0	18.74	0	0	0	3.04	0	0	0	0	0	3.68	2.61	12.06	0.71	0	0	0	0	0	0	0	11.6	0	0	14.63	0	3.44	3.85	2.42
1072	FBtr0343853	protein_coding_gene	FBgn0001565	Hlc	Helicase	CG1666	mRNA	FBtr0343853	Hlc-RB		4.31	8.72	6.91	19.48	0	17.19	0.4	0.06	2.16	15.17	0	0.63	24.32	1.37	0	1.01	0	5.56	5.57	2.05	0	0.9	0	0	6.4	0	5.61	19.68	0.06	28.38	11.85	11.1	4.95	0	0	21.28	13.4	11.56	0
1073	FBtr0073841	protein_coding_gene	FBgn0001612	Grip91	Gamma-tubulin ring protein 91	CG10988	mRNA	FBtr0073841	Grip91-RA		9.89	8.86	5.92	1.86	14.03	4.3	3.02	10.09	20.42	6.77	2.34	0.22	0	0	10.63	15.59	65.46	11.21	0.32	0.93	10.34	5.49	1.16	4.03	0.78	5.04	1.75	2.09	26.13	5.15	2.32	9.03	6.21	0	11.08	0	0.24	1.55	2.55
1074	FBtr0073483	protein_coding_gene	FBgn0001624	dlg1	discs large 1	CG1725	mRNA	FBtr0073483	dlg1-RC		0	0	0	0	6.89	0	9.89	2.97	0	0	0.01	0	56.03	0	0	0	0	0	1.06	0	0	0	4.02	4.56	0	0	21.37	2.85	1.31	0	0	4.44	7.51	0	0	9.09	0	0	0
1075	FBtr0073484	protein_coding_gene	FBgn0001624	dlg1	discs large 1	CG1725	mRNA	FBtr0073484	dlg1-RF		0	0	0.54	0	17.54	1.31	1.52	0	0.47	1.01	0.21	0	6.81	1.37	0	0	0	0.04	0.16	0	2.14	0.55	0.27	1.44	1.62	0	0.63	0.17	0.39	0	0.51	0.11	0.24	0	0.41	0.3	0	0	0
1076	FBtr0073485	protein_coding_gene	FBgn0001624	dlg1	discs large 1	CG1725	mRNA	FBtr0073485	dlg1-RD		0	0	0	0	0	0.27	0.46	0	0	0	0	0	0	0	0	0	0	0	0	0	0	0	0	0	0	0	0	0	0	0	0	0	0	0	0	0	0	0	0
1077	FBtr0073486	protein_coding_gene	FBgn0001624	dlg1	discs large 1	CG1725	mRNA	FBtr0073486	dlg1-RA		0	0	0	0	0	0	0	0	0	0	0	0	0	0	0	0	0	0	0	0	0	0	0	0	0	0	0	0	0	0	0	0	0	0	0	0	0	0	0
1078	FBtr0073487	protein_coding_gene	FBgn0001624	dlg1	discs large 1	CG1725	mRNA	FBtr0073487	dlg1-RE		3.29	26.36	0	0	0	0	0	0	4.81	11.91	0	0	0	0	14	0	0	0	0	0	0	0	0	0	0	0	0	0	8.93	26.45	4.36	0	0	0	0	0	0	0	0
1079	FBtr0073488	protein_coding_gene	FBgn0001624	dlg1	discs large 1	CG1725	mRNA	FBtr0073488	dlg1-RB		83.49	80.92	108.26	131.48	55.64	167.6	125.09	152.27	87.09	80.41	2.72	13.01	0	163.64	46.31	19.03	3.52	40.73	1.5	0.69	8.87	1.75	1.73	50.15	45.85	12.68	3.99	53.86	27.31	47.32	35.75	35.03	10.61	5.09	50.74	17.01	0	0	0
1080	FBtr0073489	protein_coding_gene	FBgn0001624	dlg1	discs large 1	CG1725	mRNA	FBtr0073489	dlg1-RG		0	0	0	0	0	0	0	0	0	0	0	0	0	0	0	0	0	0	0	0	0	0	0	0	0	0	0	0	0	0	0	0	0	0	0	0	0	0	0
1081	FBtr0073490	protein_coding_gene	FBgn0001624	dlg1	discs large 1	CG1725	mRNA	FBtr0073490	dlg1-RH		1.84	10.69	0	0	0	24.04	0	0	2.02	5.18	0	0	0	0	35.42	31.04	0	63.3	0	0	0	0	0	0	0	0	0	24.66	25.96	30.31	55.07	0	0	128.61	0	266.06	0	0	0
1082	FBtr0073491	protein_coding_gene	FBgn0001624	dlg1	discs large 1	CG1725	mRNA	FBtr0073491	dlg1-RI		2.15	1.34	3.78	2.55	0	0	0	0.39	0	0	0	0	0	0	1.8	0	0	0	0	0	0	0	0	0	0	0	3.41	0	0	0	0	0	0	0	0.09	0	0	0	0
1083	FBtr0073492	protein_coding_gene	FBgn0001624	dlg1	discs large 1	CG1725	mRNA	FBtr0073492	dlg1-RJ		0.41	1.69	0	0.18	0	0	0	0.38	4.36	0.82	0	0	0	3.43	28.66	5.13	0	0.6	0	0	0	0	0	0	0	0	0	0	0	0	2.75	0	0	0	0	0	0	0	0
1084	FBtr0112812	protein_coding_gene	FBgn0001624	dlg1	discs large 1	CG1725	mRNA	FBtr0112812	dlg1-RK		4.79	9.01	5.22	1.9	0.7	0	0.06	2.86	11.81	1.17	2.91	5.38	0	0	24.95	1.65	71.51	7.75	0	11.72	19.63	8.84	0.28	13.91	0	0	5.7	11.6	27.64	0.74	5.65	1.91	13.13	31.06	14.24	1.49	0	0	0.52
1085	FBtr0112813	protein_coding_gene	FBgn0001624	dlg1	discs large 1	CG1725	mRNA	FBtr0112813	dlg1-RL		63.67	78.89	56.61	135.48	9.84	136.02	135.86	42.49	47.43	49.35	19.48	135.84	139.71	610.9	22.41	39.52	45.66	47.6	123.54	99.87	117.53	96.37	73.21	185.06	215.42	72.93	30.21	14.7	2.79	44.47	24.13	15.82	55.14	150	141.62	367.5	24.76	16.67	15.81
1086	FBtr0301288	protein_coding_gene	FBgn0001624	dlg1	discs large 1	CG1725	mRNA	FBtr0301288	dlg1-RM		2.27	1.3	0.9	1.54	0.08	0.48	0.96	0.81	0	0.21	0	0	0	0	0.39	0.76	0	0	0	0	0	0	0	0	0	0	0	0.27	0	0.17	0	0	0	0	0	0	0.56	0	0
1087	FBtr0301289	protein_coding_gene	FBgn0001624	dlg1	discs large 1	CG1725	mRNA	FBtr0301289	dlg1-RN		0	0	0	0	0	0	0	0	64.84	0	0.16	0	0	0	6.11	0	0	0	0	0	0	0	0	0	0	0	0	1.05	0	0	0.02	0	0	0	0	0	0	0	0
1088	FBtr0302114	protein_coding_gene	FBgn0001624	dlg1	discs large 1	CG1725	mRNA	FBtr0302114	dlg1-RO		0.95	0.62	3.02	5.19	3.9	6.59	13.6	9.91	8.15	0.9	1.12	0.15	2.96	0.87	1.61	5.38	1.41	0	0	0.21	14.52	6.33	2.8	7.01	7.21	0	1.26	0.65	0	6.24	3.67	1.07	4.27	26.34	6.57	0	0	0	0
1089	FBtr0308088	protein_coding_gene	FBgn0001624	dlg1	discs large 1	CG1725	mRNA	FBtr0308088	dlg1-RP		35.47	29.64	6.1	10.72	100.17	2.04	0	19.83	0	26.07	13.13	0	0	19.83	0	0	0	8.36	0	0	0	0	0	0	0	29.92	0	17.22	0	0	0	11.02	25.67	0	1.34	0	0	0	0
1090	FBtr0308089	protein_coding_gene	FBgn0001624	dlg1	discs large 1	CG1725	mRNA	FBtr0308089	dlg1-RQ		0	6.55	3.32	25.39	0	0	0	0	0	0	1.79	0	0	0	0	0	0	0	0	0	0	0	50.25	14.66	343.9	26.61	0	19.01	0	0	0	8.01	50.21	4.38	0	23.98	0	0	0
1091	FBtr0330390	protein_coding_gene	FBgn0001624	dlg1	discs large 1	CG1725	mRNA	FBtr0330390	dlg1-RR		0	0	0	0	0	0.27	0.46	0	0	0	0	0	0	0	0	0	0	0	0	0	0	0	0	0	0	0	0	0	0	0	0	0	0	0	0	0	0	0	0
1092	FBtr0333261	protein_coding_gene	FBgn0001624	dlg1	discs large 1	CG1725	mRNA	FBtr0333261	dlg1-RS		0	2.61	0	0	0	0	0	0	0	0	1.55	0	0	0	0	0	0	0	0	0	0	0	0	6.44	0	0	3.55	0	0	0	0	0	0	0	0	39.51	0	0	0
1093	FBtr0333262	protein_coding_gene	FBgn0001624	dlg1	discs large 1	CG1725	mRNA	FBtr0333262	dlg1-RT		22.2	20.55	58.02	19.67	149.6	10.8	30.44	89.94	0	77.39	1.34	2.3	399.31	121.11	48.55	97	4.88	2.38	13.59	0	45.45	38.75	1.5	0	0	1.72	43.2	16.71	60.08	0	5.25	11.22	30.02	0	11.89	3.65	0	0	0
1094	FBtr0333263	protein_coding_gene	FBgn0001624	dlg1	discs large 1	CG1725	mRNA	FBtr0333263	dlg1-RU		0	0	0	0	41.08	0	81.94	0	17.41	0	0	0	0	0	0	0	0	0	0	0	0	0	0	0	0	0	0	0	0	0	0	0	0	0	0	0	3.99	22.26	18.23
1095	FBtr0079179	protein_coding_gene	FBgn0001941	ifc	infertile crescent	CG9078	mRNA	FBtr0079179	ifc-RA		29.45	19.2	18.41	10.92	0	5	18.79	16	11.14	8.78	15.99	0	1.48	0.13	21.88	5.38	0	0.08	0	30.34	13.44	5.55	0.9	9.55	0	7.29	30.97	4.15	0	9.61	0	7.25	6.8	7.02	24.79	0	0	0	0
1096	FBtr0332599	protein_coding_gene	FBgn0001941	ifc	infertile crescent	CG9078	mRNA	FBtr0332599	ifc-RB		2.3	0.94	0.64	10.13	14.55	36.68	6.37	3.04	0	8.77	2.53	2.24	68.68	0	0	1.11	9.07	12.32	0.16	9.79	7.42	6.5	2.24	96.31	79.69	76.24	0.3	1.15	6.79	0	2.44	5.34	0	22.36	11.14	1.01	0.38	0.86	11.62
1097	FBtr0079175	protein_coding_gene	FBgn0001942	eIF4A	eukaryotic translation initiation factor 4A	CG9075	mRNA	FBtr0079175	eIF4A-RA		329.17	367.55	292.32	219.15	41.34	373.79	190.74	324.09	227.2	227.3	0	0	0	0	169.48	109.58	67.61	67.06	66.63	44.19	0	0	0	0	0	13.5	0	130.95	60.85	93.68	182.81	0	0	230.73	0	112.31	79.95	60.98	98.85
1098	FBtr0079176	protein_coding_gene	FBgn0001942	eIF4A	eukaryotic translation initiation factor 4A	CG9075	mRNA	FBtr0079176	eIF4A-RC		24.2	14.77	35.42	125.02	0	0	63.57	14.76	0	14.2	1.11	19.12	0.31	5.12	12.9	5.5	7.95	4.43	10.04	17.04	0	36.27	10.05	0	12.47	11.84	43.45	18.9	0	15.63	7.92	4.81	0	9.07	19.89	42.3	1.6	52.81	7.48
1099	FBtr0079177	protein_coding_gene	FBgn0001942	eIF4A	eukaryotic translation initiation factor 4A	CG9075	mRNA	FBtr0079177	eIF4A-RB		0	9.24	5.63	0	0	0	0.66	8.97	5.47	5.74	0	34.57	0	0	0.79	0	0	0	0	0	0	0	0	0	0	0	0	0	57.72	15.24	0.62	0	0	0	0	0	11.89	0	0
1100	FBtr0079178	protein_coding_gene	FBgn0001942	eIF4A	eukaryotic translation initiation factor 4A	CG9075	mRNA	FBtr0079178	eIF4A-RD		9.7	17.31	5.34	0.49	0	2.2	0	2.25	5.42	0	14.31	0	0	0	2.12	0	0.35	0.23	0.65	0	18.79	0.9	4.75	64.88	3.51	0	14.7	1.76	6.17	4.9	0	6.42	22.99	0	27.46	0	1.05	0	0
1101	FBtr0307068	protein_coding_gene	FBgn0001942	eIF4A	eukaryotic translation initiation factor 4A	CG9075	mRNA	FBtr0307068	eIF4A-RE		162.28	220.11	192.08	80.66	247.84	68.36	50.66	94.7	39.13	87.29	203.97	60.63	231.44	45.23	69.53	39.7	72.58	67.72	131.93	60.4	224.22	360.86	206.59	249.2	402.01	34.03	266.53	29.47	48.5	59.96	40.11	248.15	331.48	39.37	273.02	37.78	44.15	29.58	20.16
1102	FBtr0331201	protein_coding_gene	FBgn0001942	eIF4A	eukaryotic translation initiation factor 4A	CG9075	mRNA	FBtr0331201	eIF4A-RF		1.14	0	0	0	0	0	0	0	0	0	0.32	0	0	0	0	0	0	0	0	0	0	0	0	0	0	0	0.17	0	0	0	0	0	0	0	0	0	0	0	0
1103	FBtr0080569	protein_coding_gene	FBgn0001961	Arpc1	Actin-related protein 2/3 complex, subunit 1	CG8978	mRNA	FBtr0080569	Arpc1-RB		13.28	41.17	43.37	0.06	0.19	5.36	33.81	175.18	28.52	6.55	18.28	12.36	0	0	2.58	0.32	0	1.94	0.79	0	0.51	5.08	3.72	0.9	0	0	22.18	36.48	11.74	3.36	66.04	12.59	1.51	8.19	0.24	0	17.96	22.5	46.34
1104	FBtr0080570	protein_coding_gene	FBgn0001961	Arpc1	Actin-related protein 2/3 complex, subunit 1	CG8978	mRNA	FBtr0080570	Arpc1-RA		45.89	27.49	3.11	0	0.16	0	23.03	9.3	0	3.33	5.88	0	0	0	1.93	5.36	0	0	0	0	0	1.78	0	0	0	0	6.56	2.85	0	0	0	0.91	0	0	0	0	6.57	0	0
1105	FBtr0080541	protein_coding_gene	FBgn0001965	Sos	Son of sevenless	CG7793	mRNA	FBtr0080541	Sos-RA		23.71	26.53	24.74	23.98	8.86	20.45	44.95	30.22	10.79	30.2	10.14	0.09	9.82	11.44	22.06	23.7	30.63	5.28	2.06	10.6	54.18	22.82	6.77	27.4	6.88	35.4	7.51	14.44	33.08	24.64	16.54	13.5	19.16	17.02	22.38	3.3	2.05	0.34	4.15
1106	FBtr0290243	protein_coding_gene	FBgn0001967	NimC3	Nimrod C3	CG16880	mRNA	FBtr0290243	NimC3-RB		0	0	0	0	0	0	0	0	0	0	0	0	0	0	0	0	0	0	0	0	0	0	0	0	0	0	0	0	0	0	0	0	0	0	0	0	0	0	0
1107	FBtr0080629	protein_coding_gene	FBgn0001970	Pgant35A	Polypeptide N-acetylgalactosaminyltransferase 35A	CG7480	mRNA	FBtr0080629	Pgant35A-RA		0.91	0.49	0	0	0	4.16	24.48	0	0	0	0.64	8.54	0	0	0	1.97	0	0	0	0	0	1.64	0.07	0	0	0	1.14	0.71	0	2.16	0.05	0	9.25	0	2.95	0	2.94	7.46	4.87
1108	FBtr0080725	protein_coding_gene	FBgn0001977	CIAPIN1	Cytokine induced apoptosis inhibitor 1	CG4180	mRNA	FBtr0080725	CIAPIN1-RA		22.62	22.89	19	21.05	0.33	0	2.44	30.73	5.17	29.14	6.86	3.9	43	1.4	52.74	28.17	5.5	0.41	2.88	0	5.52	4.84	2.65	35.52	8.2	0	14.62	16.8	15.86	10.19	20.38	12.48	24.05	0.41	33.72	0.79	0.63	7.19	0
1109	FBtr0080705	protein_coding_gene	FBgn0001978	stc	shuttle craft	CG3647	mRNA	FBtr0080705	stc-RB		1.78	1.42	6.77	0.33	0	0	0	0	0	1.19	1.98	0	0	0	0	0	0	0	0	0	0	0	0	0	0	0	0	0	0	0	1.81	0	3.09	0	0	0	0	0	0
1110	FBtr0080706	protein_coding_gene	FBgn0001978	stc	shuttle craft	CG3647	mRNA	FBtr0080706	stc-RA		3.57	7.24	0	0.07	0.39	0	0	0	0	3.2	2.66	0	5.31	0	3.34	0.52	0	0	0	0	2.02	0	0	0	0	0	0	0	5.76	0	0	0	3.03	0	5.41	0	0	0	0
1111	FBtr0332473	protein_coding_gene	FBgn0001978	stc	shuttle craft	CG3647	mRNA	FBtr0332473	stc-RC		0	0.44	0	0	0	0.92	0	4.07	1.84	0	0	0.93	0	36.27	0	0	0.39	0.46	0.7	0.94	0	0.44	0.6	2.09	0.06	0.19	1.03	2.04	0	1.85	0	4.8	0	0	0	10.68	0.07	1.41	1.39
1112	FBtr0332474	protein_coding_gene	FBgn0001978	stc	shuttle craft	CG3647	mRNA	FBtr0332474	stc-RD		0	0	0	0	0	0	2.65	0	0	0.54	0	0	0	0	0	0	0	0	0	0	0	0	0	0	0	0	0	0	0.24	0	0	0	8.75	0	0	0	0	0	0
1113	FBtr0080734	protein_coding_gene	FBgn0001981	esg	escargot	CG3758	mRNA	FBtr0080734	esg-RA		0.09	0.67	0.73	0	0	0	0	0	0	0.38	0.57	0	0	0	0	0	0	0	0	0	3.4	0	0	1.83	0	0	34.18	0	0.27	0	0	0	0.66	3.9	0.57	0	0	0	0
1114	FBtr0080740	protein_coding_gene	FBgn0001983	wor	worniu	CG4158	mRNA	FBtr0080740	wor-RA		0	0	0	0	0	0	0	0	0	0	0	0	0	0	0	0	0	0	0	0	0	0	0	0	0	0	0	0	0	0	0	0	0	0	0	0	0.14	0	0
1115	FBtr0080760	protein_coding_gene	FBgn0001986	Mtr4	Mtr4 helicase	CG4152	mRNA	FBtr0080760	Mtr4-RA		3.91	3.31	3.86	5.43	0	0	2.76	7.21	1.47	1.52	1.12	0	0	0	1.31	5.52	1.24	0	7.62	0.04	8.04	1.78	0.64	0.44	0	0	0.08	7.7	0.07	1.45	0.17	0.11	3.83	0	1.95	0	0	2	0
1116	FBtr0080765	protein_coding_gene	FBgn0001987	Gli	Gliotactin	CG3903	mRNA	FBtr0080765	Gli-RA		0	0	0	0	0	0	0	0	0	0	0	0	0	0	0	0	0	0	0	0	0	0	0	0	0	0	2.49	0	0	0	0	0	0	0	0	0	0	0	0
1117	FBtr0080767	protein_coding_gene	FBgn0001987	Gli	Gliotactin	CG3903	mRNA	FBtr0080767	Gli-RC		0	0	0	0	0	0	0	0	0	0	0	0	0	0	0	0	0	0	0	0	0	0	0	0	0	0	0	0	0	0	0	0	0	0	0	0	0.07	0	0
1118	FBtr0080768	protein_coding_gene	FBgn0001987	Gli	Gliotactin	CG3903	mRNA	FBtr0080768	Gli-RD		0.43	0	0	0	0	0	0	0.42	0	0.12	0.18	6.96	0	0	0.16	0	0	0	0	0.34	3.47	0.38	0	0.14	0	0	0	0.03	0	0	0	0	0.54	0	1.21	0	0	0	0
1119	FBtr0080769	protein_coding_gene	FBgn0001987	Gli	Gliotactin	CG3903	mRNA	FBtr0080769	Gli-RE		0	0	0	0	0	0	0	0	0	0	0.18	0	0	0	0	0	0	0	0	0	0	0	0	0	0	0	0	0	0	0	0	0	0	0	0	0	0	0	0
1120	FBtr0343721	protein_coding_gene	FBgn0001987	Gli	Gliotactin	CG3903	mRNA	FBtr0343721	Gli-RF		0	0.8	0.21	0	0	0	0	0	0.26	0	0	0	0	0	0	0	0	0	0	0	0	0	0	0	0	0	0	0	0	0	0	1.06	0	0	0	0	0	0	0
1121	FBtr0080771	protein_coding_gene	FBgn0001989	ND-B17	NADH dehydrogenase (ubiquinone) B17 subunit	CG13240	mRNA	FBtr0080771	ND-B17-RA		19.07	12.1	17.47	4.41	26.95	2.91	11.24	41.29	1.19	19.72	15.36	8.34	0	0	52.53	0	16.02	6.1	54.79	34.26	3.83	2.48	1.32	11.82	4.03	0	142.53	32.18	61.21	39.43	14.65	0	20.88	0	0	0	263.41	459.57	475.97
1122	FBtr0343722	protein_coding_gene	FBgn0001989	ND-B17	NADH dehydrogenase (ubiquinone) B17 subunit	CG13240	mRNA	FBtr0343722	ND-B17-RC		1.97	7.14	7.77	26.81	51.37	0	0.36	0.93	0	0.81	32.35	0.45	0	0	1.76	7.49	0.93	0	0.85	7.82	2.54	5.91	4.95	31.93	0	0	19.65	0.83	2.07	0.37	0	26.49	13.32	4.9	38.28	0	18.01	2.94	1.88
1123	FBtr0080764	protein_coding_gene	FBgn0001990	wek	weckle	CG4148	mRNA	FBtr0080764	wek-RA		1.5	0	0	12.93	0	0	0	0	7.92	0	0	0	0	0	0.32	0.3	0	0	2.45	0	0	0	0	0	0	6.56	0	0	0	0	0.29	0	0	0	0	0	0	0	0
1124	FBtr0331282	protein_coding_gene	FBgn0001990	wek	weckle	CG4148	mRNA	FBtr0331282	wek-RB		5.55	7.57	2.96	2.92	0.39	0	15.91	0.95	0	7.04	1.37	11.23	3.5	0	0	0	0.07	0.22	0	0	3.06	1.55	14.79	10.14	0.08	6.7	4.65	5.5	0	0.28	3.19	1.23	4.5	0	3.88	0.12	3.7	4.59	0.16
1125	FBtr0332021	protein_coding_gene	FBgn0001991	Ca-α1D	Ca<up>2+</up>-channel protein α<down>1</down> subunit D	CG4894	mRNA	FBtr0332021	Ca-α1D-RF		0	0	0	0	0	0	0	0	0	0	0	0	0	0	0	0	0	0	0	0	0	0	0	0	0	0	0	0	0	0	0	0	0	0	0	0	0	0	0
1126	FBtr0332022	protein_coding_gene	FBgn0001991	Ca-α1D	Ca<up>2+</up>-channel protein α<down>1</down> subunit D	CG4894	mRNA	FBtr0332022	Ca-α1D-RG		28.11	37.89	27.99	23.98	23.62	23.09	36.25	42.38	9.18	25.18	1.04	10.14	3.91	13.64	26.85	31.7	2.4	4.2	1.48	4.29	17.14	11.02	3.73	28.96	28.12	0.76	4.4	8.39	5.81	17.76	38.5	4.04	4.77	66.3	27.57	5.65	3.37	0	5.07
1127	FBtr0332023	protein_coding_gene	FBgn0001991	Ca-α1D	Ca<up>2+</up>-channel protein α<down>1</down> subunit D	CG4894	mRNA	FBtr0332023	Ca-α1D-RH		0	0	0	0	0	0	0	0	0	0	0	0	0	0	0	0	0	0	0	0	0	0	0	0	0	0	0	0	0	0	6.31	0	0	0	0	0	0	0	0.52
1128	FBtr0332024	protein_coding_gene	FBgn0001991	Ca-α1D	Ca<up>2+</up>-channel protein α<down>1</down> subunit D	CG4894	mRNA	FBtr0332024	Ca-α1D-RI		0	0	3.12	0	0	28.73	0	0	11.06	0	0	0	7.36	0	0	32.34	0.51	0	0	0	0	0	0	0	0	0	0	0	0	0	0	0	0	0	0	0	0	0	2.25
1129	FBtr0332025	protein_coding_gene	FBgn0001991	Ca-α1D	Ca<up>2+</up>-channel protein α<down>1</down> subunit D	CG4894	mRNA	FBtr0332025	Ca-α1D-RJ		0	0	0	0	0	0	11.32	0	0	0	0	16.01	45.13	0	12.53	0	4.37	0	0	0	0	0.4	2.94	1.19	16.62	43.87	0	0	0	0	10.67	0	7.46	0	4.37	0	0.11	0	1.99
1130	FBtr0479784	protein_coding_gene	FBgn0001991	Ca-α1D	Ca<up>2+</up>-channel protein α<down>1</down> subunit D	CG4894	mRNA	FBtr0479784	Ca-α1D-RK		15	25.76	40.77	17.08	3.45	0	18.77	18.91	12.68	14.03	8.09	8.03	91.15	65.61	0	24.4	4.92	14.68	5.8	18.05	39.1	40.26	18.93	63.96	26.83	18.15	40.44	0	5.06	11.54	0	20.76	22.81	0	36.53	4.71	1.47	0	0.8
1131	FBtr0479785	protein_coding_gene	FBgn0001991	Ca-α1D	Ca<up>2+</up>-channel protein α<down>1</down> subunit D	CG4894	mRNA	FBtr0479785	Ca-α1D-RL		12.79	13.37	9.45	12.56	4.83	16.03	6.37	20.21	0	15.21	0.73	0	0	131.1	44.57	7.1	2.21	0.98	2.7	0.18	3.83	0.68	2.88	10.26	0	0	2.23	46.62	12.36	8.2	14.25	5.55	8.92	33.81	11.24	0	0	0	1.02
1132	FBtr0479786	protein_coding_gene	FBgn0001991	Ca-α1D	Ca<up>2+</up>-channel protein α<down>1</down> subunit D	CG4894	mRNA	FBtr0479786	Ca-α1D-RM		0	0	0	0	0	0	0	0	0	0	0	0	0	0	0	0	0	0	0	0	0	0	0	0	0	0	0	0	0	0	0	0	0	0	0	0	0	0	0
1133	FBtr0479787	protein_coding_gene	FBgn0001991	Ca-α1D	Ca<up>2+</up>-channel protein α<down>1</down> subunit D	CG4894	mRNA	FBtr0479787	Ca-α1D-RN		24.91	8.96	3.43	37.55	8.04	27.11	5.68	18.64	6.1	12.72	0.23	5.18	2.48	0	0	0	7.72	0	13.92	12.15	0	0	0	0	21.74	19.22	0	15.82	31.61	0	8.74	0	0	80.17	0	78.27	0	3.57	0
1134	FBtr0479788	protein_coding_gene	FBgn0001991	Ca-α1D	Ca<up>2+</up>-channel protein α<down>1</down> subunit D	CG4894	mRNA	FBtr0479788	Ca-α1D-RO		18.71	23.64	10.71	9.5	0	13.83	10.4	18.97	39.28	10.64	1.09	19.19	0.1	2.67	17.78	32.73	0.45	2.78	0.57	0	9.47	0.1	1.38	2.52	0.8	0	4.23	8.8	0	2.27	22.17	6.25	6.6	0	0.34	46.13	1.63	0	0
1135	FBtr0080828	protein_coding_gene	FBgn0001992	Cyp303a1	Cyp303a1	CG4163	mRNA	FBtr0080828	Cyp303a1-RA		0.36	5.69	4.55	0	0	0	0	3.25	6.41	6.93	0.54	0	8.6	0	0	0	0	0	0	0.08	20.75	0	0	0	0	0	0.29	7.94	0	1.4	0.12	0.48	0	0	18.3	0	0	0	0
1136	FBtr0343812	protein_coding_gene	FBgn0001992	Cyp303a1	Cyp303a1	CG4163	mRNA	FBtr0343812	Cyp303a1-RB		0.33	0	0	22.9	0	0	0	2.28	0	0	0.56	0.23	1.75	0	0	0	0	0.45	0	0	7.09	0.06	0.4	1.35	0.09	0	0.97	0.15	0	0.89	0	0.28	10.84	0	13.8	0.25	0	0	0
1137	FBtr0080854	protein_coding_gene	FBgn0001994	crp	cropped	CG7664	mRNA	FBtr0080854	crp-RA		6.03	0	0	26.21	115.51	0	43.71	0	0.15	5.87	0	0	0	40.76	0	56.55	0	0	0	0	0	0	0	0	0	0	0	0	0	29.42	70.15	4.89	0	0	0	0	4	0	0
1138	FBtr0343814	protein_coding_gene	FBgn0001994	crp	cropped	CG7664	mRNA	FBtr0343814	crp-RB		87.97	90.64	71.31	54.26	76.58	22.5	98.17	86.67	49.74	71.84	36.62	48.65	110.37	137.09	44.01	13.07	12.19	25.47	13.94	48.55	58.01	64.27	117.81	112.8	158.89	54.87	57.55	26.67	20.08	35.46	39	61.3	92.31	248.09	93.26	105.07	0	0.51	4.76
1139	FBtr0080843	protein_coding_gene	FBgn0001995	mRpL4	mitochondrial ribosomal protein L4	CG5818	mRNA	FBtr0080843	mRpL4-RA		7.63	11.96	2.98	43.87	0	0	11.9	18.56	3.21	9.97	0.51	0	0	0	5.64	0	0	0	0	0	0	12	1.43	9.55	0	190.78	4.5	0.69	36.19	0.12	24.83	3.66	0	0	10.95	0	43.55	27.99	29.45
1140	FBtr0081177	protein_coding_gene	FBgn0002021	l(2)37Bb	lethal (2) 37Bb	CG10655	mRNA	FBtr0081177	l(2)37Bb-RA		2.53	4.58	8.8	0	0	0	4.02	26.94	0	4.39	2.15	0	0	0	17.66	0	0	1.26	2.62	0	0	0	4.99	0	0.1	0.12	1.6	0.76	0	0.89	4.96	0.76	0	0	5.06	0	14.62	4.16	2.32
1141	FBtr0081143	protein_coding_gene	FBgn0002022	Catsup	Catecholamines up	CG10449	mRNA	FBtr0081143	Catsup-RA		2.49	2.26	1.87	0.96	0.64	0	1.15	24.86	0	9.67	2.89	0	0	0	7	2.15	0.92	0	1.94	0	1.3	8.27	1.61	0	0	3.18	19.9	19.25	0	8.7	2.35	0.99	1.2	0	0.47	0	10.86	0.43	12.25
1142	FBtr0081169	protein_coding_gene	FBgn0002023	Lim3	Lim3	CG10699	mRNA	FBtr0081169	Lim3-RB		0	0	0	0	0	0	0	0	0	0	0	0	0	0	0	0	0	0	0	0	0	0	0	0	0	0	0	0	0	0	0	0	0	0	0	0	0	0	0
1143	FBtr0081170	protein_coding_gene	FBgn0002023	Lim3	Lim3	CG10699	mRNA	FBtr0081170	Lim3-RA		0	0	0	0	0	0	0	0	0	0	1.7	2.73	0	0	0	0	0	0	0	0	0	0	0	0	0	0	0	0	0	0	0	0.43	0.04	0	0	0	0	0	0
1144	FBtr0309832	protein_coding_gene	FBgn0002023	Lim3	Lim3	CG10699	mRNA	FBtr0309832	Lim3-RC		0	0	0	0	0	0	0	0	0	0	0	0	0	0	0	0	0	0.22	0	0	0	0	0	0	0	0	0	0	0	0	0	0	0	17.34	0	0	0	0	0
1145	FBtr0309833	protein_coding_gene	FBgn0002023	Lim3	Lim3	CG10699	mRNA	FBtr0309833	Lim3-RD		0	0.04	0	0	0	0	0	0	0	0	0.23	0	0	0	0	0	0	0	0.07	0	0	0	0	0	0	1.66	0	0	0	0	0	0.38	0	0	0	0	0	0	0
1146	FBtr0309834	protein_coding_gene	FBgn0002023	Lim3	Lim3	CG10699	mRNA	FBtr0309834	Lim3-RE		0	0	0	0	0	0	0	0	0	0	6.03	0	0	0	0	0	0	0.75	0	0.06	0	0	4.55	5.99	0	0	0	0.06	18.93	0.2	0	0	0	0	0	13.79	0	0	0
1147	FBtr0309835	protein_coding_gene	FBgn0002023	Lim3	Lim3	CG10699	mRNA	FBtr0309835	Lim3-RF		0.03	0	0	0	0	0	0	0	0	0	1.5	8.97	0	0	0	0	7.03	0.13	12.41	0	0.22	0	1.82	0	0	0.12	0.31	0	0.26	0	0	0.79	0.02	8.17	0	0	0	0.27	0
1148	FBtr0329940	protein_coding_gene	FBgn0002023	Lim3	Lim3	CG10699	mRNA	FBtr0329940	Lim3-RG		0	0.04	0	0	0	0	0	0	0	0	0.23	0	0	0	0	0	0	0	0.07	0	0	0	0	0	0	1.66	0	0	0	0	0	0.38	0	0	0	0	0	0	0
1149	FBtr0081164	protein_coding_gene	FBgn0002031	l(2)37Cc	lethal (2) 37Cc	CG10691	mRNA	FBtr0081164	l(2)37Cc-RB		21.67	5.78	0	4.82	0	0	9.36	16.84	5.46	0	0	0	0	0	9.25	0	0	0.52	0	0	0	4.38	3.32	0	0	0	6.43	3.89	0	22.36	11.37	0	0	0	0	0	164.35	62.73	118.53
1150	FBtr0081165	protein_coding_gene	FBgn0002031	l(2)37Cc	lethal (2) 37Cc	CG10691	mRNA	FBtr0081165	l(2)37Cc-RA		6.79	18.53	14.77	58.7	0.02	215.4	25.34	7.03	2.29	6.71	3.57	23.59	26.58	0.18	10.53	0	22.67	0	0	150.86	2.44	0	0.74	2.37	0	20.04	5.19	15	0	3.59	23.6	0	17.73	0	6.19	0	17.7	52.79	49.06
1151	FBtr0346428	protein_coding_gene	FBgn0002031	l(2)37Cc	lethal (2) 37Cc	CG10691	mRNA	FBtr0346428	l(2)37Cc-RD		1.74	7.61	2.53	0.48	0.13	0	0.48	8.58	1.35	2.08	8.88	1.08	148.22	0	1.09	3.85	0	0	2.44	0.18	13.08	0	2	5.22	0.08	6.21	11.43	13.53	2.8	0.16	1.59	1.36	29.59	0	27.51	0	0	0	0.88
1152	FBtr0081155	protein_coding_gene	FBgn0002036	CG10561		CG10561	mRNA	FBtr0081155	CG10561-RA		1.77	1.18	4.34	5.7	2.12	7.87	0.05	16.73	1.3	6.79	4.91	3.34	1.74	0.11	21.71	1.37	1.36	1.29	0.82	0.68	18.92	5.32	8.73	13.19	2.74	0.1	3.27	5.35	7.84	0.61	2.01	6.28	3.28	9.18	11.18	77.62	25.35	13.29	24.1
1153	FBtr0081244	protein_coding_gene	FBgn0002044	swm	second mitotic wave missing	CG10084	mRNA	FBtr0081244	swm-RA		16.78	10.55	39.91	0	0	10.9	0	8	10.01	18.95	0	24.87	8.08	0	0	56.5	0	0	0	12.05	0	0	0	0	0	0	0	0.91	36.1	30.09	0	0.38	7.07	1.4	1.18	23.57	0	0	0
1154	FBtr0081245	protein_coding_gene	FBgn0002044	swm	second mitotic wave missing	CG10084	mRNA	FBtr0081245	swm-RB		33.54	38.93	30.14	0.83	47.19	19.02	10.54	51.33	11.54	2.87	5.62	17.48	1.22	62.26	14.15	9.11	0	22.97	4.1	0.2	46.22	10.1	16.68	18.8	0	0	4.51	29.12	13.61	7.2	0	11.44	1.16	0	0.99	3.91	0	2.82	3.98
1155	FBtr0331325	protein_coding_gene	FBgn0002044	swm	second mitotic wave missing	CG10084	mRNA	FBtr0331325	swm-RC		4.64	25.19	0.21	3.21	0	22.8	0.9	0	3.73	13	12.08	2.39	8.48	6.5	66.6	1.33	0.74	0	0	2.98	12.41	47.79	5.56	55.24	3.99	0	19.7	0	0	5.48	18.7	0	56.7	0	22.43	62.32	6.88	0	4.74
1156	FBtr0331326	protein_coding_gene	FBgn0002044	swm	second mitotic wave missing	CG10084	mRNA	FBtr0331326	swm-RD		10.45	0	1.76	0	0.08	0	0	10.96	3.02	14.63	0	0	0	0	0	1.77	0.62	6	0	0	0	0	0	0	0	3.27	0	3.45	7.32	0	4.28	1.42	0	0.14	8.53	0	0	0	0
1157	FBtr0087784	protein_coding_gene	FBgn0002069	AspRS	Aspartyl-tRNA synthetase	CG3821	mRNA	FBtr0087784	AspRS-RA		0	0	0	0	0	0	0	0	0	0	2.8	0	0	0	0	0	0	0	0	0	0	0	0.65	0	0	0	0	0.84	0	0	0	0	0	0	0	0	0	0	0
1158	FBtr0332882	protein_coding_gene	FBgn0002069	AspRS	Aspartyl-tRNA synthetase	CG3821	mRNA	FBtr0332882	AspRS-RB		0	0	0	0	0	0	0	0	0	0	1.22	0	0	0	0	0	0	0	0	0	1.26	0	0.65	0	0	0	7.82	0	0	0	0	0	0	0	0.29	0	0	0	0
1159	FBtr0339391	protein_coding_gene	FBgn0002069	AspRS	Aspartyl-tRNA synthetase	CG3821	mRNA	FBtr0339391	AspRS-RC		5.34	5.47	7.19	0	0	2.65	0.78	8.58	10.35	2.81	0	0	0	0	6.17	5.3	0.96	0	3.2	0	0	0.18	0	9.46	0.62	11.99	41.08	0	3.39	4.23	0	0.06	3	0	4.69	0	0	6.05	4.96
1160	FBtr0078166	protein_coding_gene	FBgn0002121	l(2)gl	lethal (2) giant larvae	CG2671	mRNA	FBtr0078166	l(2)gl-RB		0	0	0	0	0	0	0	0	0	0	0	0	0	0	0	0	0	0	0	0	0	0	0	0	0	0	0	0	0	0	0	2.3	0	0	0	0	0	0	0
1161	FBtr0078167	protein_coding_gene	FBgn0002121	l(2)gl	lethal (2) giant larvae	CG2671	mRNA	FBtr0078167	l(2)gl-RD		0	0	0	0	0	0	0	0	0	0	0	0	0	0	0	0	0	0	0	0	0	0	0	0	0	0	0	0	0	0	0	0	0	0	0	0	0	0	0
1162	FBtr0078168	protein_coding_gene	FBgn0002121	l(2)gl	lethal (2) giant larvae	CG2671	mRNA	FBtr0078168	l(2)gl-RE		0	0	0	0	0	0	0	0	0	0	0	0	0	0	0	0	0	0	0	0	0	0	0	0	0	0	0	0	0	0	0	0	0	0	0	0	0	0	0
1163	FBtr0078169	protein_coding_gene	FBgn0002121	l(2)gl	lethal (2) giant larvae	CG2671	mRNA	FBtr0078169	l(2)gl-RF		0.06	0	0	0	0	0	0	0.38	0	0	0	1.16	0	0	1.36	1.21	0	0	11.41	0.23	0	0	0.26	0	0	0	4.09	7.04	0	0.09	0	0.1	0	0.88	0	0	0	0	0
1164	FBtr0078170	protein_coding_gene	FBgn0002121	l(2)gl	lethal (2) giant larvae	CG2671	mRNA	FBtr0078170	l(2)gl-RC		0	0.16	0	0	0	0	0	0	0	0	0	0	0	0	0	0	0	0.03	0	0	0	0	0	0.77	0	0	0	0	0	0	0	0	0	0	0	0	0	0	0
1165	FBtr0078171	protein_coding_gene	FBgn0002121	l(2)gl	lethal (2) giant larvae	CG2671	mRNA	FBtr0078171	l(2)gl-RA		0	0	0	0	0	0	0	0	0	0	0.93	0	0	0	0	0	0	0	0	0	0	0	0	0	0	0	13.27	0	0	0	0	0	0	0	0.07	0	0.16	0	0
1166	FBtr0306589	protein_coding_gene	FBgn0002121	l(2)gl	lethal (2) giant larvae	CG2671	mRNA	FBtr0306589	l(2)gl-RG		0	0	0	0	0	0	0	0	0	0	0	0	0	0	0	0	0	0	0	0	0	0	0	0	0	0	0	0	0	0	0	0	0	0	0	0	0	0	0
1167	FBtr0306590	protein_coding_gene	FBgn0002121	l(2)gl	lethal (2) giant larvae	CG2671	mRNA	FBtr0306590	l(2)gl-RH		0	0	0	0	0	0	0	0	0	0	3.08	0	0	0	0	0	0	0	0	0	0	0	0	0	0	0	0	0	0	0	0	0	0	0	0	0	0	0	0
1168	FBtr0306591	protein_coding_gene	FBgn0002121	l(2)gl	lethal (2) giant larvae	CG2671	mRNA	FBtr0306591	l(2)gl-RI		0	0	0	0	0	0	0	0	0	0	0	0	0	0	0	0	0	0	0	0	0	0	0	0	0	0	0	0	0	0	0	0	0	0	0	0	0	0	0
1169	FBtr0306592	protein_coding_gene	FBgn0002121	l(2)gl	lethal (2) giant larvae	CG2671	mRNA	FBtr0306592	l(2)gl-RJ		0	0	0	0	0	0	0	0	0	0	0.39	0	0	0	0	0	0	0	0	0	0	0	0	0	0	0	4.65	0	0	0	0	0	0	0	0	0	0	0	0
1170	FBtr0330655	protein_coding_gene	FBgn0002121	l(2)gl	lethal (2) giant larvae	CG2671	mRNA	FBtr0330655	l(2)gl-RK		0	0	0	0	0	0	0	0	0	0	0	0	0	0	0	0	0	0	0	0	0	0	0	0	0	0	0	0	0	0	0	0	0	0	0	0	0	0	0
1171	FBtr0089503	protein_coding_gene	FBgn0002174	CG5504		CG5504	mRNA	FBtr0089503	CG5504-RA		0	0	0	0	0	0	0	0	0	0	0	0	0	0	0	0	0	0	0	0	0	0	0	0	0	0	0	0	0	6.82	0	0	0	0	0	0	3.73	0	0
1172	FBtr0089504	protein_coding_gene	FBgn0002174	CG5504		CG5504	mRNA	FBtr0089504	CG5504-RB		0.4	0.2	0	0	0	0	0	0	0	0	1.58	0	0	0	1.41	0	0	0	0	0	0	0	0	0	0	0	0.21	3.72	0	0	0	6.81	0	0	1.61	0	14.01	6.74	16.83
1173	FBtr0089505	protein_coding_gene	FBgn0002174	CG5504		CG5504	mRNA	FBtr0089505	CG5504-RC		1.28	0.52	1.29	0	0	0	0	2.62	0	0	0	0	0	0	1.32	2.05	0	5.25	0	11.7	0	0	0	0	0	0	0	0	0	3.93	0	0	0	0	0.3	0	2.39	0	1.46
1174	FBtr0306253	protein_coding_gene	FBgn0002174	CG5504		CG5504	mRNA	FBtr0306253	CG5504-RD		0	5.38	0	2.26	0	0.4	0	0	10.53	0.35	0	0	0	0	0	0	0	0	0.59	0	0	0.3	0.05	0	0	0	0	0	0.28	0	0	0	0	0	0	0	1.28	0	0.06
1175	FBtr0344995	protein_coding_gene	FBgn0002174	CG5504		CG5504	mRNA	FBtr0344995	CG5504-RE		0	0	0	0	0	0	0.77	0	0	0	0	0	0	0	0.19	0.92	0	3.08	0	0	0	0	0	0	0	0	0.09	0	0	0	0.07	0.21	4.94	0	0	0	0	1.33	0
1176	FBtr0072864	protein_coding_gene	FBgn0002183	dre4	dre4	CG1828	mRNA	FBtr0072864	dre4-RA		12.95	18.89	19.69	0	0	0	0	14.29	3.31	12.34	4.85	0	0	0	8.16	0	0	0	0	0	9.88	1.02	3.51	4.1	2.67	0	10.25	8.41	2.01	6.33	4.48	7.43	2.77	0	4.56	0	0.86	1.76	0
1177	FBtr0072865	protein_coding_gene	FBgn0002183	dre4	dre4	CG1828	mRNA	FBtr0072865	dre4-RB		2.15	0	0	5.02	4.4	10.19	12.99	0	0	0	0.41	0.63	0	2.95	0	13.98	0.57	1.56	0	1.54	0	0.37	0	7.84	0	0.94	0	0	4.38	0	0	0	0	7.79	0	4.53	0	0	0
1178	FBtr0075311	protein_coding_gene	FBgn0002283	l(3)73Ah	lethal (3) 73Ah	CG4195	mRNA	FBtr0075311	l(3)73Ah-RA		0	2.46	1.35	0	0	0	0	4.14	0	1.38	2.01	0	0	0	0	0	0	0	0	0	0	8.06	16.8	0	0	0	1.05	13.3	0	0	0	8.87	0.36	0	5.14	0	0	7.31	0
1179	FBtr0307336	protein_coding_gene	FBgn0002283	l(3)73Ah	lethal (3) 73Ah	CG4195	mRNA	FBtr0307336	l(3)73Ah-RB		6.59	21.47	18.54	0.47	0.08	0	1.78	13.78	1.38	7.89	1.28	0	19.98	0	32.2	0.2	0	1.67	0	0	2.73	0	9.65	17.18	0	0	13.79	0	0	0	0	0	0	0	10.87	0	49.86	4.6	9.44
1180	FBtr0075360	protein_coding_gene	FBgn0002284	Prosβ6	Proteasome β6 subunit	CG4097	mRNA	FBtr0075360	Prosβ6-RA		5.85	2.06	5.35	0	0	0	11.46	2.56	2.64	1.01	5.38	0	0	0	5.34	1.59	0.48	1.23	0	0	0	0	6.07	52.12	0	1.91	12.98	0.89	0	0.4	0.25	20.2	5.95	0	1.26	0.82	60.59	35.59	45.23
1181	FBtr0081570	protein_coding_gene	FBgn0002306	sas	stranded at second	CG2507	mRNA	FBtr0081570	sas-RB		0	0	0	0	0	0	0	0	0	0	0	0	0	0	0	0	0	0	0	0	0	0	0	0	0	0	0	0	0	0	0	0	0	0	0	0	0	0	0
1182	FBtr0081571	protein_coding_gene	FBgn0002306	sas	stranded at second	CG2507	mRNA	FBtr0081571	sas-RA		0	0	0	0	0	0	0	0	0	0	0.12	0	0	0	0	0	0	0	0	0	0	0	0	0	0	0	0	0	0	0	0	0	0	0	0	0	0	0	0
1183	FBtr0334884	protein_coding_gene	FBgn0002306	sas	stranded at second	CG2507	mRNA	FBtr0334884	sas-RC		0	0.02	0	0	0	0	0	0	0.14	0	0	0	0	0	0	0	0	0	0	0	0	0	0	1.57	0	0	0.04	0	0	0	0	0	0	0	0.77	0	0	0	0
1184	FBtr0334885	protein_coding_gene	FBgn0002306	sas	stranded at second	CG2507	mRNA	FBtr0334885	sas-RD		0	0	0	0	0	0	0	0	0	0	0.05	0	0	0	0	0	0	0	0	0	0	0	0	0	0	0	0	0	0	0	0	0	0	0	0	0	0	0	0
1185	FBtr0082703	protein_coding_gene	FBgn0002354	l(3)87Df	lethal (3) 87Df	CG7620	mRNA	FBtr0082703	l(3)87Df-RA		12.19	17.45	15.44	13.55	56.5	16.03	0	7.46	3.58	1.73	89.09	0	0	0	0.62	19.49	0	3.03	0	0	16.74	0	24.6	0	0	102.36	0	0.3	89.69	18.78	0	38.48	112.01	0	0	0	237.92	154.79	127.76
1186	FBtr0085742	protein_coding_gene	FBgn0002413	dco	discs overgrown	CG2048	mRNA	FBtr0085742	dco-RA		1.77	0.4	1.88	1.69	0.35	0	8.7	0.51	0.24	10.94	1.25	0	0	1.11	0	0	0	12	0	0	0.37	0	0.04	0	0	0	0	50.93	0	62.93	12.15	0	0.1	0	0	0	0	0	0
1187	FBtr0085743	protein_coding_gene	FBgn0002413	dco	discs overgrown	CG2048	mRNA	FBtr0085743	dco-RB		0	0.97	8.04	0.17	0.13	0	0	0.41	0.42	8.55	0.46	0	0	0.62	0.27	0.48	0	1.09	0	0.1	7.21	0	0	0	0	0	0.96	1.81	3.08	0	0	0	0.66	0	0	0	0	0	0
1188	FBtr0085744	protein_coding_gene	FBgn0002413	dco	discs overgrown	CG2048	mRNA	FBtr0085744	dco-RC		51.33	56.39	36.09	73.39	0	20.58	0.48	40.53	5.72	20.3	8.51	8.65	3.29	78.89	70.51	97.78	0	0.23	0.13	4.2	81.99	7.81	24.82	79.82	174.33	0.47	36.93	4.07	4.08	8.58	6.22	9.5	9.44	0	25.12	7.01	4.19	0	3.81
1189	FBtr0334548	protein_coding_gene	FBgn0002413	dco	discs overgrown	CG2048	mRNA	FBtr0334548	dco-RD		77.18	72.52	68.92	75.36	6.87	37.07	49.36	83.56	53.61	68.01	26.33	62.18	122.17	72.32	25.37	185.73	28.83	56.01	86.88	90.92	105.45	90.84	62.97	162.01	108.55	61.07	42.94	49.97	20.36	23.29	20.01	55.85	99.25	24.28	99.83	117.11	17.92	4.96	5.42
1190	FBtr0473370	protein_coding_gene	FBgn0002413	dco	discs overgrown	CG2048	mRNA	FBtr0473370	dco-RE		0	0	0	0	0.42	0	0.01	0	0	0.18	0	0	0	0	6.39	0	0.06	1.14	0	0.95	0	0	0	0	0	0	0	0.47	6.17	17	4.27	0	0	0	0	0	0	0	0
1191	FBtr0082090	protein_coding_gene	FBgn0002431	hyd	hyperplastic discs	CG9484	mRNA	FBtr0082090	hyd-RA		64.18	79.04	77.4	58.14	34.72	43.67	32.84	76.52	51.1	56.69	17.22	21.43	9.85	53.65	59.79	43.33	48.53	25.95	5.2	23.66	57.69	30.32	18.71	110.61	51.61	59.23	39.8	36.17	8.18	64.93	48.08	26.34	54.36	46.33	69.94	37.04	2.64	1.42	4.1
1192	FBtr0339599	protein_coding_gene	FBgn0002431	hyd	hyperplastic discs	CG9484	mRNA	FBtr0339599	hyd-RB		4.2	0	2.01	1.2	0	0.61	13.91	3.94	1.21	0.99	0.59	0	48.02	0.01	11.03	0	0	0.47	0.03	0.34	6.82	0.88	0	5.31	0.01	0	0	11.06	7.92	0	2.25	0	0	0.47	0	0	0.04	0.02	0.09
1193	FBtr0077062	protein_coding_gene	FBgn0002440	l(3)mbn	lethal (3) malignant blood neoplasm	CG12755	mRNA	FBtr0077062	l(3)mbn-RB		0	0	0	0	0	0	0	0	0	0	0	0	0	0	0	0	0	0	0	0	0.07	0.32	0.38	0	0	0	0	0	0	0	0	0	0	0	0	0	0	0	0
1194	FBtr0346811	protein_coding_gene	FBgn0002440	l(3)mbn	lethal (3) malignant blood neoplasm	CG12755	mRNA	FBtr0346811	l(3)mbn-RD		0	0	0	0	0	0	0	0	0	0	0	0	0	0	0	0	0	0	0	0	0	0	0	0	0	0	0	0	0	0	0	0	0	0	0	0	0	0	0
1195	FBtr0346812	protein_coding_gene	FBgn0002440	l(3)mbn	lethal (3) malignant blood neoplasm	CG12755	mRNA	FBtr0346812	l(3)mbn-RE		0	0	0	0	0	0	0	0	0	0	0	0	0	0	0	0	0	0	0	0	0	0	0	0	0	0	0	0	0	0	0	0	0	0	0	0	0	0	0
1196	FBtr0085175	protein_coding_gene	FBgn0002441	l(3)mbt	lethal (3) malignant brain tumor	CG5954	mRNA	FBtr0085175	l(3)mbt-RB		13.11	13.67	8.55	7.81	1.54	7.48	3.62	8.01	4.83	10.19	3.95	0.02	6.88	51.18	7.62	9.11	10.82	0.38	2.55	3.36	7.81	5.29	8.24	11	0	0.47	3.89	8.1	6.13	18.94	2.88	10.28	6.39	0.24	3.33	0	1.98	1.59	5.71
1197	FBtr0075970	protein_coding_gene	FBgn0002466	sti	sticky	CG10522	mRNA	FBtr0075970	sti-RA		0.18	0.05	0	0	0	0	4.44	0.02	0	0	0	0	0	0.59	0	0	0	0	0	0	0.48	0	0	0.15	0	0	0	0	0	0	0	0.41	0.09	0	0.11	0	0.14	0.1	0
1198	FBtr0332643	protein_coding_gene	FBgn0002466	sti	sticky	CG10522	mRNA	FBtr0332643	sti-RB		0	0	0	0	0	0	0	0	0	0	0	0	0	0	0	0.37	0	0	0	0	0	0	0	0	0	0	0	0	0	0	0	0	0	0	0	0	0	0	0
1199	FBtr0089204	protein_coding_gene	FBgn0002521	pho	pleiohomeotic	CG17743	mRNA	FBtr0089204	pho-RA		18.74	21.79	19.93	8.31	3.37	8.53	8.09	29.05	18.72	20.3	21.73	33.66	20.14	0	28.04	44.54	16.12	8.37	38.25	6.91	74.37	52.83	50.67	72.74	56.28	0	37.06	24.62	13.12	10.96	0.88	31.17	82.04	46.24	71.63	41.98	0	0	0
1200	FBtr0089205	protein_coding_gene	FBgn0002521	pho	pleiohomeotic	CG17743	mRNA	FBtr0089205	pho-RB		14.67	41.84	11.59	6.19	0	0	0	22.1	27.7	33.43	15.49	1.5	0	26.39	0	128.96	22.73	20.78	93.45	0	25.7	16.33	20.78	17.09	138.07	209.24	36.03	0	100.52	20.1	24.58	26.4	35.24	0	38.84	2.92	11.76	0.95	2.81
1201	FBtr0081696	protein_coding_gene	FBgn0002522	lab	labial	CG1264	mRNA	FBtr0081696	lab-RA		0	0	0	0	0	0	0	0	0	0	0	0	0	0	0	0	0	0	0	0	0	0	0	0	0	0	0	0	0	0	0	0	0	0	0	0	0	0	0
1202	FBtr0308035	protein_coding_gene	FBgn0002522	lab	labial	CG1264	mRNA	FBtr0308035	lab-RB		0	0	0	0	0	0	0	1.6	0	0	0.11	0	0	0.14	0.09	0	0	0	0	0	0	0	0	0.48	0	0	0	0	0	0	0	0	0	0	0	0	0	0	0
1203	FBtr0080738	protein_coding_gene	FBgn0002524	lace	lace	CG4162	mRNA	FBtr0080738	lace-RA		0.9	5.68	0.26	3.04	0	0	0	0	0	6.39	3.7	0	0.13	0	0.29	0	0	0	0	0	2.81	12.66	7.4	1.75	0.09	12.41	22.59	0	0.54	0	0	0	17.56	5.83	5.02	0	1.3	3.98	11.35
1204	FBtr0343735	protein_coding_gene	FBgn0002524	lace	lace	CG4162	mRNA	FBtr0343735	lace-RB		14.4	11.52	17.51	10.74	0	1.28	21.92	22.78	12.91	2.5	4	0.05	0	0	9.1	9.72	1.34	1.05	0	2.23	0	5.3	0	0	0	0	9.16	11.84	53.86	2.15	3.44	1.97	0	0	0	0.72	1.58	0	1.31
1205	FBtr0079100	protein_coding_gene	FBgn0002525	Lam	Lamin	CG6944	mRNA	FBtr0079100	Lam-RA		12.66	22.29	21.11	4.93	22.78	10.21	2	27.96	17.15	35.54	12.55	18.49	28.87	42.94	0	7.92	21.64	8.47	9.82	10.48	42.17	21.18	9.69	86.28	65.16	19.38	27.02	0	9.19	12.35	31.95	23.75	0	10.64	16.02	122.6	2.79	10.31	7.75
1206	FBtr0307058	protein_coding_gene	FBgn0002525	Lam	Lamin	CG6944	mRNA	FBtr0307058	Lam-RB		5.12	10.89	14.52	0	0	0	0	0	0.98	0	0	4.83	0	0	1.16	0	0	0	0	0	0	0	0	0.99	0	0	0	0.73	0	0	0	0	16.4	0	0.62	0	0	0	0
1207	FBtr0307059	protein_coding_gene	FBgn0002525	Lam	Lamin	CG6944	mRNA	FBtr0307059	Lam-RC		1.61	1.7	0.67	0	0	0	0	0.28	0	1.16	2.91	0	0	0	23.84	0	0	0	0	0	2.19	0	0	2.06	4.39	0	2.67	0	0	0	0.26	0	12.09	0	0.57	0	0	0	0
1208	FBtr0346460	protein_coding_gene	FBgn0002525	Lam	Lamin	CG6944	mRNA	FBtr0346460	Lam-RD		1.55	1.63	5.37	0	0	0	0	10.9	0	1.83	0	0	0	0	0.62	0	0	0	0	0	0	0	0	1.91	19.8	0	7.22	11.25	0	6.93	0	0	1.06	0	0	0	0	0	0
1209	FBtr0077014	protein_coding_gene	FBgn0002526	LanA	Laminin A	CG10236	mRNA	FBtr0077014	LanA-RA		0.23	0.31	0	0	0	0	0	0.14	0	0	2.98	0	0	0.04	0	0	0.93	0	0	14.48	1.28	0	0.25	0	0	0.02	1.29	0	0	0	0	2.85	0.04	0	0.01	0	0	0	0
1210	FBtr0088763	protein_coding_gene	FBgn0002531	Lcp1	Larval cuticle protein 1	CG11650	mRNA	FBtr0088763	Lcp1-RA		0	0.26	10.56	3.32	0	0	0	0	0	0	0	0	0	0	2.22	0	0	0	0	0	0	0	0	0	0	0	0	0	0	0	0	0	0	0	0	0	0	0	0
1211	FBtr0333557	protein_coding_gene	FBgn0002531	Lcp1	Larval cuticle protein 1	CG11650	mRNA	FBtr0333557	Lcp1-RB		0	0	0	0	0	0	2.51	0.59	0	0	0.11	0	0	0	0	0	0	0	0	0	0	1.77	0	3.85	0	0	0	0	0	0	0	0	0.31	0	0.37	0	0	0	0
1212	FBtr0088761	protein_coding_gene	FBgn0002533	Lcp2	Larval cuticle protein 2	CG8697	mRNA	FBtr0088761	Lcp2-RA		0	1.05	0	0	0	0	0	0	0	0	0	0	0	0	0.96	0	0	0	0	0	0	0	0	0	0	0	0	0	0	0	0	0	0	0	0	0	0	0	0
1213	FBtr0333556	protein_coding_gene	FBgn0002533	Lcp2	Larval cuticle protein 2	CG8697	mRNA	FBtr0333556	Lcp2-RB		0	0.53	3.02	0	0	0	0	0	0	0	0	0	0	0	0	0	0	0	0	0	0	0	0	0	0	0	0	1.98	0	0	0	0	0	0	0	0	0	0	0
1214	FBtr0088743	protein_coding_gene	FBgn0002534	Lcp3	Larval cuticle protein 3	CG2043	mRNA	FBtr0088743	Lcp3-RA		0	0	0	0	0	0	0	0	0	0	0	0	0	0	0	0	0	0	0	0	0	0	0	0	0	0	0	0	0	0	0	0	0	0	0	0	0	0	0
1215	FBtr0333554	protein_coding_gene	FBgn0002534	Lcp3	Larval cuticle protein 3	CG2043	mRNA	FBtr0333554	Lcp3-RB		0	0	0	0	0	0	0	0	0	0	0	0	0	0	0	0	0	0	0	0	0	0	0	0	0	0	1.93	0	0	0	0	0	0	0	0	0	0	0	0
1216	FBtr0088744	protein_coding_gene	FBgn0002535	Lcp4	Larval cuticle protein 4	CG2044	mRNA	FBtr0088744	Lcp4-RA		0	0	0	0	0	0	0	0	0	0	0	0	0	0	0	0	0	0	0	0	5.61	0	0	0	0	0	0	0	0	0	0	0	0	0	0	0	0	0	0
1217	FBtr0333555	protein_coding_gene	FBgn0002535	Lcp4	Larval cuticle protein 4	CG2044	mRNA	FBtr0333555	Lcp4-RB		0	0	0	0	0	0	0	0	0	0	0	0	0	0	0	0	0	0	0	0	54.05	0	0	0	0	0	0	0	0	0	0	0	0	0	0	0	0	0	0
1218	FBtr0081758	protein_coding_gene	FBgn0002542	lds	lodestar	CG2684	mRNA	FBtr0081758	lds-RA		0.06	0.15	3.54	0	0	0	0	0	0	0	0.58	0	0	0	0	0	0	0	0	4.39	0	0	1.15	0	0.04	0	0	0	0	0	0	0	0.02	0	0.03	0	0	0	0.09
1219	FBtr0077941	protein_coding_gene	FBgn0002543	robo2	roundabout 2	CG5481	mRNA	FBtr0077941	robo2-RA		0.02	0	0	0	0	0	0.16	0.01	0	0	0.98	0	0	0	0	0.03	0	0.07	0.01	0	0.07	0	0.87	0.85	0	0	0.7	0.64	0.18	1.69	8.82	3.39	6.82	1.82	1.61	12.1	0	0	0
1220	FBtr0329985	protein_coding_gene	FBgn0002543	robo2	roundabout 2	CG5481	mRNA	FBtr0329985	robo2-RB		0.02	0	0	0	0	0	0.16	0.01	0	0	0.98	0	0	0	0	0.03	0	0.07	0.01	0	0.07	0	0.87	0.85	0	0	0.7	0.64	0.18	1.69	8.82	3.39	6.82	1.82	1.61	12.1	0	0	0
1221	FBtr0088651	protein_coding_gene	FBgn0002552	lin	lines	CG11770	mRNA	FBtr0088651	lin-RA		26.64	17.9	21.72	5.35	0	0.6	0.72	22.89	15.37	8.88	2.78	0	2.39	0	9.37	4.27	0	8.05	0	0	10.21	0	3.47	13.49	0	1.52	5.89	10.38	5.39	5.14	26.72	0.08	1.95	0	7.63	0	0	0	1.28
1222	FBtr0070074	protein_coding_gene	FBgn0002561	l(1)sc	lethal of scute	CG3839	mRNA	FBtr0070074	l(1)sc-RA		0	0	0	0	0	0	0	0	0	0	0	0	0	0	0	0	0	0	0	0	0	0	0	0	0	0	0	0	0	0	0	0	0	0	0	0	0	0	0
1223	FBtr0073651	protein_coding_gene	FBgn0002562	Lsp1α	Larval serum protein 1 α	CG2559	mRNA	FBtr0073651	Lsp1α-RA		0	0	0	0	0	0	0	0	0	0	0	0.1	0	0	0	0	0	0	0	0	0.22	0	0.03	0	0	0	0	0	0	0	0	0	0	2.62	0	0	0	0	0
1224	FBtr0078025	protein_coding_gene	FBgn0002563	Lsp1β	Larval serum protein 1 β	CG4178	mRNA	FBtr0078025	Lsp1β-RA		0.12	0	0	0	0	0	0	0	0	0	0	0	0	0	0	0	0	0	0.64	0	0.16	0	0.08	0	0.17	0	5.22	0	0	0	0	0	0	0.07	0	0	0	0	0
1225	FBtr0345738	protein_coding_gene	FBgn0002563	Lsp1β	Larval serum protein 1 β	CG4178	mRNA	FBtr0345738	Lsp1β-RB		0	0	0	0	0	0	0	0	0	0	0	0	0	0	0	0	0	0	0	0	0	0	0	0	0	0	0.59	0	0	0	0	0	0	0	0	0	0	0	0
1226	FBtr0072463	protein_coding_gene	FBgn0002564	Lsp1γ	Larval serum protein 1 γ	CG6821	mRNA	FBtr0072463	Lsp1γ-RA		0	0.09	0	0	0	0	0	1.04	0	0	0	0	0	0	0	0	0	0	0	0.05	0	0	0.03	0	0.18	0	0.27	0	0	0	0	0	0	2.37	0.18	0	0	0	0
1227	FBtr0089324	protein_coding_gene	FBgn0002565	Lsp2	Larval serum protein 2	CG6806	mRNA	FBtr0089324	Lsp2-RA		0	0	0	0	0	0	0	0	0	0	0	0	0	0	0	0	0	0	0	0	0.06	0	0	0	0	0	0	0	0	0	0	0	0.13	0.08	0	0	0	0	0
1228	FBtr0345352	protein_coding_gene	FBgn0002565	Lsp2	Larval serum protein 2	CG6806	mRNA	FBtr0345352	Lsp2-RB		0	0	0	0	0	0	0	0	0	0	0	0	0	0	0	0	0	0	0	0	0	0	0.2	0	0.18	0	0.22	0	0	0	0	0	0	0	0	0	0	0	0
1229	FBtr0111123	protein_coding_gene	FBgn0002566	lt	light	CG18028	mRNA	FBtr0111123	lt-RC		8.49	6.53	10.49	0	0	42.7	8.59	7.16	1.4	3.76	4.96	47.48	0	0	16.39	2.61	3.39	0.37	1.66	2.31	0	47.85	29.02	4.21	6.3	8.03	11.32	13.08	0.61	3.89	4.01	13.71	3.08	0	8.34	47.46	0	0.56	0
1230	FBtr0111125	protein_coding_gene	FBgn0002566	lt	light	CG18028	mRNA	FBtr0111125	lt-RA		14.17	15.08	6.61	9.6	0	113.8	25.08	9.01	12.99	21.11	3.15	2.88	38.69	61.43	20.47	28.65	0	5.26	0	0	7.73	25.91	8.89	24.49	3.72	8.34	12.81	13.77	7.1	10.57	17.91	1.67	62.94	12.28	6.01	0	8	3.96	5.28
1231	FBtr0333519	protein_coding_gene	FBgn0002566	lt	light	CG18028	mRNA	FBtr0333519	lt-RE		0	1.2	7.66	0	9.45	2.69	0	1.87	0	1.08	2.54	6.25	23.98	8.48	0.23	3.72	0.05	0	6.85	0	0	0.86	3.44	4.01	0	0.12	0	1.02	0.29	0	0	6.06	0	0	11.67	0	1.02	0	0.35
1232	FBtr0344082	protein_coding_gene	FBgn0002566	lt	light	CG18028	mRNA	FBtr0344082	lt-RF		1.52	3.67	1.22	0	0.1	0	0.17	4.44	0.04	0.12	1.14	0	0	0	0	0.5	0.43	0	0	0	7.64	1.55	0.88	0	0	0	10.59	1.42	0	0.68	0	0	4.46	0	1.38	0.26	0	0	0
1233	FBtr0089931	protein_coding_gene	FBgn0002567	Rab32	Rab32	CG8024	mRNA	FBtr0089931	Rab32-RB		0	0	0	0	0	0	0	0	0	0	2.26	0	0	0	0	0	0	0	0	0	0.07	0	0	0	0	0	0	0	0	0	0	6.43	0	0	0	0	0	0	0
1234	FBtr0089932	protein_coding_gene	FBgn0002567	Rab32	Rab32	CG8024	mRNA	FBtr0089932	Rab32-RE		0	0	0	0	0	0	0	0	0	0	0	0	0	0	0	0	0	0	0	0	0	0.18	0	0	0	0	0	0	0	0.16	0	0	0	0	0	0	0	0	0
1235	FBtr0089933	protein_coding_gene	FBgn0002567	Rab32	Rab32	CG8024	mRNA	FBtr0089933	Rab32-RD		0	0	0	0	0	0	0	0	0	0	0	0	0	0	0	0	0	0	0	0	0	6.25	0	0	0	0	1.1	0	0	0	0	2.48	0	0	1.48	0	0	0	0
1236	FBtr0089934	protein_coding_gene	FBgn0002567	Rab32	Rab32	CG8024	mRNA	FBtr0089934	Rab32-RC		0.39	0.38	0	0.04	0	0	0	0.51	0.22	0	1.29	0	0	0	14.63	0	0	0.86	0	13.26	0	0	7.49	0.55	0.1	0	0.93	1.83	0	0	0	2.67	6.92	0	0.1	0	0	0	0
1237	FBtr0339369	protein_coding_gene	FBgn0002567	Rab32	Rab32	CG8024	mRNA	FBtr0339369	Rab32-RH		0	0.32	0.3	0	0	0	0	0.08	0	0	4.12	0	0	0	0	0.51	0	0	3.6	0	3.36	29.95	0	0	17.05	0	20.15	0	0	0	0	0	0	35.16	0.08	0	0	0	1.09
1238	FBtr0346635	protein_coding_gene	FBgn0002567	Rab32	Rab32	CG8024	mRNA	FBtr0346635	Rab32-RI		0	0.19	0	0	0	0	0	0	0	0	0	0	0	0	0	0	0	0	0	0	1.06	0	0	0	0	0	0	0	0	0	0	0	0	0	0	0	0	0	0
1239	FBtr0346636	protein_coding_gene	FBgn0002567	Rab32	Rab32	CG8024	mRNA	FBtr0346636	Rab32-RJ		0	0	0	0	0	0	0	0	0	0	0	0	0	0	0	0	0	0	0	0	0	0	0	0	0	0	0	0	0	14.5	0	0	0	0	0	0	0	0	0
1240	FBtr0088747	protein_coding_gene	FBgn0002569	Mal-A2	Maltase A2	CG8694	mRNA	FBtr0088747	Mal-A2-RA		0	0	0	0	0	0	0	0	0	0	0	0	0	0	0	0	0	0	0	0	0	0	0	0	0	0	0.53	0	0	0	0	0	0	0	0	0	0	0	0
1241	FBtr0088759	protein_coding_gene	FBgn0002570	Mal-A1	Maltase A1	CG8696	mRNA	FBtr0088759	Mal-A1-RA		0	0	0	0	0	0.1	0	0	0	0	0	0	0	0	2.01	10.49	0	0	0	0	5.09	0	0	0	0	0	0	0	0	0	0	0	0	0	0	0	0	0	0
1242	FBtr0088758	protein_coding_gene	FBgn0002571	Mal-A3	Maltase A3	CG8695	mRNA	FBtr0088758	Mal-A3-RA		0	0	0	0	0	0	0	0	0	0	0	0	0	0	0	0	0	0	0	0	0	0	0	0	0	0	0	0	0	0	0	0	0	0	0	0	0	0	0
1243	FBtr0075862	protein_coding_gene	FBgn0002573	sens	senseless	CG32120	mRNA	FBtr0075862	sens-RA		0	0	0	0	0	0	0	0	0	0	0.03	0	0	0	0	0	0	0	0	0	0	0	0	0	0	0	0	0	0	0	0	0	0	0	0	0	0	0	0
1244	FBtr0071320	protein_coding_gene	FBgn0002576	lz	lozenge	CG1689	mRNA	FBtr0071320	lz-RA		0	0	0	0	0	0	0	0	0	0	0	0	0	0	0	0	0	0	0	0	0	0	0	0	0	0	0	0	0	0	0	0	0	0	0	0	0	0	0
1245	FBtr0112814	protein_coding_gene	FBgn0002576	lz	lozenge	CG1689	mRNA	FBtr0112814	lz-RB		0	0	0	0	0	0	0	0	0	0.27	0.47	0	0.06	0	0	0	0	13.18	0	0	0.83	0	0.13	0	0	0	0	0	0	0	0	0	0	0	0.07	0	0	0	0
1246	FBtr0073555	protein_coding_gene	FBgn0002577	m	miniature	CG9369	mRNA	FBtr0073555	m-RA		0	0	0	0	0	0	0	0	0	0	0	0	0	0	0	0	0	0	0	0	0	0	0	0	0	0	0	0	0	0.03	0.03	0	0	0	0	0	0	0	0
1247	FBtr0084957	protein_coding_gene	FBgn0002578	Kaz-m1	Kazal-type protease inhibitor m1	CG8342	mRNA	FBtr0084957	Kaz-m1-RA		0	0	0	0	0	0	0	0	0	0	0	0	0	0	0	0	0	0	0	0	0	0	0	0	0	15.62	0	0	0	0	0	0	0	0	0	0	0	0	0
1248	FBtr0310083	protein_coding_gene	FBgn0002578	Kaz-m1	Kazal-type protease inhibitor m1	CG8342	mRNA	FBtr0310083	Kaz-m1-RB		0	0	0	0	0	0	0	0	0	0	0	0	0	0	0	0	0	0	0	0	0	0	0	0	0	0	0	0	0	0	0	0	0	0	0	0	0	0	0
1249	FBtr0070155	protein_coding_gene	FBgn0002579	RpL36	Ribosomal protein L36	CG7622	mRNA	FBtr0070155	RpL36-RA		23.96	20.99	8.17	93.19	0	87.91	21.99	18.04	0.97	19.29	124.29	0	21.08	0	0	29.19	0	0	1.63	0	0	0	0	0	0	267.95	17.68	16.78	0	26.94	43.66	127.81	38.77	0	0	0	2887.87	2032.92	1946.96
1250	FBtr0070156	protein_coding_gene	FBgn0002579	RpL36	Ribosomal protein L36	CG7622	mRNA	FBtr0070156	RpL36-RB		52.24	53.27	82.98	31.21	0	244.17	54.06	84.59	13.44	89.37	246.71	0	0	0	105.73	108.9	0	0	0	0	0	294.59	101.47	204.2	0	0	141.16	49.7	0	5.16	92.57	290.98	0	0	414.22	87.28	415.19	254.17	335.66
1251	FBtr0070157	protein_coding_gene	FBgn0002579	RpL36	Ribosomal protein L36	CG7622	mRNA	FBtr0070157	RpL36-RD		0	0	0	0	0	0	0	0	0	0	0	0	0	0	0	0	0	0	0	0	0	0	0	0	0	0	0	0	0	0	0	0	0	0	0	0	0	0	0
1252	FBtr0070158	protein_coding_gene	FBgn0002579	RpL36	Ribosomal protein L36	CG7622	mRNA	FBtr0070158	RpL36-RC		0	3.13	2.41	0	0	14.08	3.04	11.37	0	1.96	635.48	0	131.86	0	4.51	6.93	0	0	0	0	175.55	494.97	44.51	0	5.27	0	301.94	0	0.52	2.72	1.55	356.08	652.33	0	523.33	1.16	84.59	7.41	24.3
1253	FBtr0345321	protein_coding_gene	FBgn0002579	RpL36	Ribosomal protein L36	CG7622	mRNA	FBtr0345321	RpL36-RE		109.53	76.18	37.08	749.52	5.78	494.48	110.59	94.03	18.36	111.38	0	89.82	0	0	134.23	264.21	38.69	51.1	26.89	105.62	0	0	0	0	0	383.53	0	160.98	0	210.63	111.52	0	0	0	0	1.96	69.36	71.85	50.95
1254	FBtr0074406	protein_coding_gene	FBgn0002590	RpS5a	Ribosomal protein S5a	CG8922	mRNA	FBtr0074406	RpS5a-RA		11.57	7.17	5.62	8.03	0	0	22.01	9.19	0	21.8	29.95	0	0	0	7.51	0	0	0	0	0	0	0	1.9	0	0	0	27.46	0	0	11.37	33.32	10.76	19.83	0	15.69	0	350.36	297.13	335.4
1255	FBtr0343292	protein_coding_gene	FBgn0002590	RpS5a	Ribosomal protein S5a	CG8922	mRNA	FBtr0343292	RpS5a-RB		0.9	0	0	0	0	0	0	0	0	0	31.17	0	0	0	0	0	0	0	0	0	0	0	0	81.48	0.2	0	0	0	0	0	0	45.96	0	0	0	0	5.46	1.81	0
1256	FBtr0343293	protein_coding_gene	FBgn0002590	RpS5a	Ribosomal protein S5a	CG8922	mRNA	FBtr0343293	RpS5a-RC		1.01	5.08	29.94	0	0	42.8	0.18	6.57	3.23	6.51	18.77	0	0	0	0	0	0.45	0	0.21	0	8.08	0.23	2.88	19.11	0.33	0	15.41	7.96	0.2	0	0.17	20.02	11	0	15.39	0	0	0	0
1257	FBtr0345132	protein_coding_gene	FBgn0002590	RpS5a	Ribosomal protein S5a	CG8922	mRNA	FBtr0345132	RpS5a-RD		48.42	51.19	68.98	214.26	85.92	254.32	128.66	40.37	6.94	47.54	17.08	0.19	0	6.57	22.49	277.74	1.31	7.04	5.97	1.55	12.21	23.3	10.06	35.19	1.03	0	67.26	6.2	15.78	43.23	48.32	0	58.01	28.04	0	0	3.19	0	4.15
1258	FBtr0084981	protein_coding_gene	FBgn0002592	E(spl)m2-BFM	Enhancer of split m2, Bearded family member	CG6104	mRNA	FBtr0084981	E(spl)m2-BFM-RA		0	0	0	0	0	0	0	0	0	0	0	0	0	0	0	0	0	0	0	0	0	0	0	0	0	0	0	0	0	0	0	0	0	0	0	0	0	0	0
1259	FBtr0078056	protein_coding_gene	FBgn0002593	RpLP1	Ribosomal protein LP1	CG4087	mRNA	FBtr0078056	RpLP1-RA		49.1	58.1	39.77	51.18	1.02	0	196.57	45.63	54.96	61.4	164.29	25.15	0	0	14.4	23.17	1.41	11.82	4.06	0.56	91.66	0	58.09	11.41	4.37	0	334.88	30.57	0	75.84	94.37	215.19	203.05	0	36.7	0	843.42	574.32	815.23
1260	FBtr0331932	protein_coding_gene	FBgn0002593	RpLP1	Ribosomal protein LP1	CG4087	mRNA	FBtr0331932	RpLP1-RB		7.37	10.09	1.97	48.8	61.87	98.57	20.76	0.8	2.28	2.04	102.77	0	0.9	0	5.22	5.41	0	3.46	0.71	0	40.59	36.31	42.02	4.63	0	0	43.84	3.39	0	8.16	3.48	178.53	59.03	0	64.41	0	6.64	0	2.86
1261	FBtr0084958	protein_coding_gene	FBgn0002609	E(spl)m3-HLH	Enhancer of split m3, helix-loop-helix	CG8346	mRNA	FBtr0084958	E(spl)m3-HLH-RA		0	0	0	0	0	0	0	0	0	0	4.05	0	0	0	0	0	0	0	0	0	0	0	0.08	0	0	0	7.18	0	0	0	0	0	0	0	0.25	0	0	0	0
1262	FBtr0084410	protein_coding_gene	FBgn0002622	RpS3	Ribosomal protein S3	CG6779	mRNA	FBtr0084410	RpS3-RA		849.1	1040.19	890.14	541.7	159.62	239.08	739.05	847.74	599.89	882.39	283.81	111.43	190.4	101.92	833.22	665.76	287.59	264.52	382.17	160.27	195.92	126.64	234.39	161.22	182.53	195.38	365.77	442.6	346.82	299.35	381.65	267	341.01	1024.29	237.55	255	538.92	287.49	345.03
1263	FBtr0346349	protein_coding_gene	FBgn0002622	RpS3	Ribosomal protein S3	CG6779	mRNA	FBtr0346349	RpS3-RB		18.11	17.08	22.69	137.59	29.75	33.24	18.73	19.99	123.29	23.09	659.14	28.22	81.54	0	46.04	3.65	27.35	7.87	5.91	14.26	374.94	119.55	401.32	325.03	350.48	2.75	484.8	42.53	23.17	28.3	37.49	728.7	762.42	72.09	755.14	0.79	120.16	102.86	109.81
1264	FBtr0085592	protein_coding_gene	FBgn0002626	RpL32	Ribosomal protein L32	CG7939	mRNA	FBtr0085592	RpL32-RB		70.67	51.1	32.89	85.74	636.11	188.18	235.01	68.79	47.05	94.2	1779.19	6.39	0	0	128.52	11.37	0	30.92	83.34	15.94	182.08	1824.26	302.36	236.52	0	2.52	743.48	102.79	6.14	100.32	141.09	601.49	1531.57	83.63	0	0	1203.73	861.54	1182.21
1265	FBtr0085593	protein_coding_gene	FBgn0002626	RpL32	Ribosomal protein L32	CG7939	mRNA	FBtr0085593	RpL32-RC		0	0.41	0	0	0	0	0	0	0	0	9.1	0	0	0	0	0	0	0	0	0	2.88	68.2	0	0	0	0	5.76	0	0	0	0	16.78	0	0	20.72	0	0	0	0
1266	FBtr0085594	protein_coding_gene	FBgn0002626	RpL32	Ribosomal protein L32	CG7939	mRNA	FBtr0085594	RpL32-RA		0	0	0	0	0	0	0	0	0	0	0	0	0	0	0	0	0	0	0	0	3.07	0	26.78	0	0	0	0	0	0	0	0	0	103.99	0	0	0	0	0	0
1267	FBtr0114555	protein_coding_gene	FBgn0002626	RpL32	Ribosomal protein L32	CG7939	mRNA	FBtr0114555	RpL32-RD		0	0	0.44	0	0	0	0	0	0	0	159.66	0	0	0	0	0	0	0	0	0	10.49	19.64	63.73	6.46	0	0	95.84	0	0	0	0	163.71	72.67	0	48.02	0	0	0	0
1268	FBtr0084980	protein_coding_gene	FBgn0002629	E(spl)m4-BFM	Enhancer of split m4, Bearded family member	CG6099	mRNA	FBtr0084980	E(spl)m4-BFM-RA		0	0	0	0	0	0	0	0	0	0	0	0	0	0	0	0	0	0	0	0	0	0	0	0	0	0	0	0	0	0	0	0	0	0	0	0	0	0	0
1269	FBtr0084979	protein_coding_gene	FBgn0002631	E(spl)m5-HLH	Enhancer of split m5, helix-loop-helix	CG6096	mRNA	FBtr0084979	E(spl)m5-HLH-RA		0	0	0	0	0	0	0	0	0	0	0	0	0	0	0	0	0	0	0	0	0	0	0	0	0	0	0	0	0	0	0	0	0	0	0	0	0	0	0
1270	FBtr0084959	protein_coding_gene	FBgn0002632	E(spl)m6-BFM	Enhancer of split m6, Bearded family member	CG8354	mRNA	FBtr0084959	E(spl)m6-BFM-RA		0	0	0	0	0	0	0	0	0	0	0	0	0	0	0	0	0	0	0	0	0	0	0	0	0	0	0	0	0	0	0	0	0	0	0	0	0	0	0
1271	FBtr0084960	protein_coding_gene	FBgn0002633	E(spl)m7-HLH	Enhancer of split m7, helix-loop-helix	CG8361	mRNA	FBtr0084960	E(spl)m7-HLH-RA		0.35	0.49	0	0	0	0	0	0	0	0	0.42	0	0	0	0	0	0	0	0	0	0	0	0	0.62	0	0	2.21	0	0	0	0	0	27.57	0	0.23	0	0	0	0
1272	FBtr0077074	protein_coding_gene	FBgn0002638	Rcc1	Regulator of chromosome condensation 1	CG10480	mRNA	FBtr0077074	Rcc1-RA		0.86	0	0	0	0	0	0	0	0	0	0.49	0	0	0	0	0	0	0	0	0	0	0	0	0	0	0	0.79	0	0	0	0	7.84	0	0	0	0	0	0	0
1273	FBtr0077075	protein_coding_gene	FBgn0002638	Rcc1	Regulator of chromosome condensation 1	CG10480	mRNA	FBtr0077075	Rcc1-RB		0.76	0	0	0	0	0	0	0	0	0	1.51	0	0	0	0	0	0	0	0	0	0	0	0	0	0	0	0	0	0	5.32	0	0	0	0	0	0	0	0	0
1274	FBtr0077076	protein_coding_gene	FBgn0002638	Rcc1	Regulator of chromosome condensation 1	CG10480	mRNA	FBtr0077076	Rcc1-RC		10.04	13.83	10.44	8.84	0	4.33	13.4	5.39	1.67	9.32	1.25	0	16.69	0.21	2.96	0.53	0	0.17	0	0	0.15	2.3	0.04	4.42	32.93	0	4.41	1.49	0.72	4.17	2.93	0	2.02	0	1.46	0	8.3	13.38	1.38
1275	FBtr0077306	protein_coding_gene	FBgn0002641	mal	maroon-like	CG1692	mRNA	FBtr0077306	mal-RA		1.42	3.36	0.79	0	0	0	4.03	0.52	2.42	1.67	0.14	0	0	0	9.73	0	0	0	0	0	2.91	0	0.82	0	0	0	0.16	0.05	0	0.12	0	0.08	0	0	0.24	0	0.86	0	2.15
1276	FBtr0344987	protein_coding_gene	FBgn0002641	mal	maroon-like	CG1692	mRNA	FBtr0344987	mal-RB		0.21	0	0.24	0	0	0	0	0	0	0	0.23	0	0	0	0	0	0	0	0	0	0	0	0	0	0	0	0	0	0	0	4.3	0	0	0	0	0	0	0	0
1277	FBtr0087596	protein_coding_gene	FBgn0002643	mam	mastermind	CG8118	mRNA	FBtr0087596	mam-RA		0.54	0.07	2.14	5.82	7.42	0	23.6	0.92	0.93	7.09	0.2	0	0	20.01	1.45	0	0	10.45	0.24	0.34	0.71	0	0.02	0.11	0	4.51	0.94	0.13	25.58	0	0	0.48	0.76	0	0.6	0.16	0	0	0
1278	FBtr0087597	protein_coding_gene	FBgn0002643	mam	mastermind	CG8118	mRNA	FBtr0087597	mam-RB		36.5	43.6	19.84	38.25	0	58.16	40.08	17.61	9.74	13.51	12.83	25.12	56.79	17.49	31.92	27.32	52.11	29.61	53.14	39.8	66.51	70.71	26.87	24.72	11.73	16.59	41	42.75	15.87	6.43	9.27	8.13	36.8	0.75	11.86	23.26	5.83	2.22	4.2
1279	FBtr0087598	protein_coding_gene	FBgn0002643	mam	mastermind	CG8118	mRNA	FBtr0087598	mam-RC		25.4	30.64	54.87	19.64	6.06	26.86	39.59	23.63	6.67	28.64	7.35	14.57	24.27	79.7	30.22	53	104.84	34.14	68.18	59.94	63.68	21.38	7.03	26.71	95.73	37.03	16.9	102.24	13.73	0.63	5.59	5.54	16.34	0	1.65	0	0.16	0	0.17
1280	FBtr0339956	protein_coding_gene	FBgn0002643	mam	mastermind	CG8118	mRNA	FBtr0339956	mam-RD		8.14	2.41	30.98	5.34	13.36	34	0	0	1.94	0	0.85	9.49	0.52	0	0	0	0	0.84	0	0.88	0.6	0	0	0	0	0	0	0.4	0	0	0	0	0	0	0	2.97	0	0	0
1281	FBtr0085875	protein_coding_gene	FBgn0002645	Map205	Microtubule-associated protein 205	CG1483	mRNA	FBtr0085875	Map205-RA		48.16	54.9	56.45	0	184.45	0	36.04	43.57	37.5	20.82	8.48	0.02	15.1	70.32	20.88	91.14	0.98	16.72	0	0	16.72	0	12.45	0	0	0	10.5	30.48	61.67	7.74	27.82	20.71	12.98	0	69.12	114.13	0.3	0	0
1282	FBtr0085876	protein_coding_gene	FBgn0002645	Map205	Microtubule-associated protein 205	CG1483	mRNA	FBtr0085876	Map205-RB		6.97	13.39	8.12	21.52	56.47	0	22.96	6.63	0	18.96	10.44	81.13	13.46	0	7.22	2.36	48.69	14.56	4.43	10.28	38.44	65.2	13.36	4	53.06	10.71	16.14	3.11	0.58	0	7.45	17.32	0	35.28	22.62	15.29	0.05	0	1.75
1283	FBtr0334299	protein_coding_gene	FBgn0002645	Map205	Microtubule-associated protein 205	CG1483	mRNA	FBtr0334299	Map205-RC		12.39	15.94	26.12	4.51	6.42	2.84	9.22	17.36	6.91	5.22	6.87	73.23	22.02	53.1	7.4	1.85	53.63	13.08	23.41	30.18	55.89	43.39	23.37	48.28	19.79	19.78	59.45	5.41	4.68	5.12	12.08	6.85	34.42	64.23	25.59	14.99	4.96	4.02	3.56
1284	FBtr0080855	protein_coding_gene	FBgn0002673	twe	twine	CG4965	mRNA	FBtr0080855	twe-RA		4.1	2.33	0	0	0	0	0	0	0.7	0	0.64	0	0	0	0	0	0	0.7	0	0	0	0	0	2.85	0	0	1.22	0	0	0	0	0	0	0	4.74	0	0	0	0
1285	FBtr0331444	protein_coding_gene	FBgn0002673	twe	twine	CG4965	mRNA	FBtr0331444	twe-RB		0	0	0	0	3.95	0	3.92	2.23	0	0.12	0	0.08	5.34	24.71	2.86	6.95	0	0	0	0.16	0	0	0	0	0	1.38	0	0	0.42	0	1.12	0.35	0	0.87	0	0	0	6.45	0
1286	FBtr0331445	protein_coding_gene	FBgn0002673	twe	twine	CG4965	mRNA	FBtr0331445	twe-RC		5.89	0	1.65	0.04	0	0	0	1.54	0.63	0.78	0.02	0	0.34	0	0	0	0	0	0	0	1.9	1.8	0	0	0	0	13.14	0.34	0	0	0	0	4.83	0	0	0	1.21	0	0.57
1287	FBtr0331446	protein_coding_gene	FBgn0002673	twe	twine	CG4965	mRNA	FBtr0331446	twe-RD		0	0	0	0	0	0	0	0	0	0	0.2	0	0	0	0	0	0	0	0	0	3.46	0	0	3.13	0	0	0	0	0	0	0	0	0	0	46.98	0	0	0	0
1288	FBtr0070656	protein_coding_gene	FBgn0002707	mei-9	meiotic 9	CG3697	mRNA	FBtr0070656	mei-9-RA		0	0	0	0	0	0	0	0	0	0	0.69	0	0	0	0	0	0	0	0	0	0	0	0.91	0	0	0	0	0	0	0	0	0	0	0	0	0	0	0	0
1289	FBtr0343574	protein_coding_gene	FBgn0002707	mei-9	meiotic 9	CG3697	mRNA	FBtr0343574	mei-9-RB		1.81	3.62	2.2	0.08	0	0	0.5	2.66	0	4.55	0	0	0	0	1.55	0.38	2.15	0	1.78	0	0	0	0	4.19	0	0	0.95	6.91	3.63	9.21	8.43	0	0	0.27	0	0	0	0	0.09
1290	FBtr0100639	protein_coding_gene	FBgn0002709	mei-218	meiotic 218	CG8923	mRNA	FBtr0100639	mei-218-RB		0.33	1.45	0	0	0.16	1.47	0	0	15.54	0.28	0.11	0.39	0	0	0.06	0	2.05	0	0	0	0	0	0	32.15	0.3	0	0	0	0	0.19	0	0	5.16	1.45	0	0	0	0	0
1291	FBtr0100640	protein_coding_gene	FBgn0002709	mei-218	meiotic 218	CG8923	mRNA	FBtr0100640	mei-218-RC		0	0	0	0	0	0	0	0	0	0	0	0	0	0	0	0	0	0	0	0	0	0	0	0	0	0	0	0	0	0	0	0	0	0	0	0	0	0	0
1292	FBtr0299823	protein_coding_gene	FBgn0002709	mei-218	meiotic 218	CG8923	mRNA	FBtr0299823	mei-218-RD		0.88	0.98	1.42	0.02	0	0.04	0	0.68	1.33	2.19	0.24	0.06	0.84	20.89	0	0	0	4.41	0.02	0.04	10.69	0	2.85	4.63	0.05	32.57	1.98	0	0	0	3.35	0	0.81	0	5	0	0	0	0
1293	FBtr0303847	protein_coding_gene	FBgn0002709	mei-218	meiotic 218	CG8923	mRNA	FBtr0303847	mei-218-RE		0.97	0	0	0	0	0	0	0.36	0	0	0.76	0	0	0	0	0	0	0	0	0	0	0	0	0	0	15.07	0	0	0	0	0	2.48	0.74	0	2.98	2.81	0	0	0
1294	FBtr0071761	protein_coding_gene	FBgn0002715	mei-S332	meiotic from via Salaria 332	CG5303	mRNA	FBtr0071761	mei-S332-RA		0.36	0	0.08	0	0	0	0	0	0.13	0	0	0	0	0	0.09	0.34	0	0	0	0	0.61	0	0.18	0	0.12	0	0.09	0	0	0	0	0.29	0	0	0.1	0	0	0	0
1295	FBtr0342979	protein_coding_gene	FBgn0002715	mei-S332	meiotic from via Salaria 332	CG5303	mRNA	FBtr0342979	mei-S332-RB		0	0.35	0	0	0	0	0	3.19	0.5	0	0.91	0	0	0	0	0	0	0	0	0	0	3.56	0	0	0	0	0	0	0	0	0	2.02	0	0	0.52	0	2.38	0	0
1296	FBtr0086461	protein_coding_gene	FBgn0002716	mei-W68	meiotic W68	CG7753	mRNA	FBtr0086461	mei-W68-RA		6.41	44.07	9.21	0.19	0	0	41.87	17.32	8.14	13.29	0.84	0	87.75	0	25.82	1.67	52.14	0	0	22.94	17.84	0	3.08	18.26	42.6	0	7.78	2.22	0.37	2.35	5.89	4.33	18.29	0	5.87	0	2.59	3.01	2.7
1297	FBtr0082660	protein_coding_gene	FBgn0002719	Men	Malic enzyme	CG10120	mRNA	FBtr0082660	Men-RB		0	0	0	0	0	0	0	0	0	0	0.78	0	46.56	0	0	0	0	0	0	0	3.48	5.98	0.5	10.86	0	0	12.29	0	0	0	0	0.37	0.57	0	1.64	0	0	0	0
1298	FBtr0082661	protein_coding_gene	FBgn0002719	Men	Malic enzyme	CG10120	mRNA	FBtr0082661	Men-RA		0.47	3.76	7.43	0	0	0	0	0	0.98	0	0.4	0	0	0	0	0	0	0	23.81	0	0	0	0.21	1.16	1.96	0	10.77	9.28	2.05	22.11	19.94	4.07	0	2.85	7.2	0	6.66	7.44	5.54
1299	FBtr0330025	protein_coding_gene	FBgn0002719	Men	Malic enzyme	CG10120	mRNA	FBtr0330025	Men-RC		27.41	31.07	11.31	39.08	0.57	14.42	7.54	19.63	20.84	19.75	10.02	7.38	0	30.75	82.29	29.87	18.8	26.3	0	3.12	53.98	61.5	29.51	43.83	20.76	97.36	0	10.27	0	15.49	0	0.07	6.69	0	29.74	11.33	27.13	38.43	65.86
1300	FBtr0073521	protein_coding_gene	FBgn0002723	Met	Methoprene-tolerant	CG1705	mRNA	FBtr0073521	Met-RA		5.26	0.19	10.52	0.26	14.82	1.33	7.92	1.5	3.47	8.41	1.4	0	0	0.46	0.5	8.88	0	0	0	37.68	0	0	0	0	0	0	0	9.55	0	0	4.56	22.17	0	0	0	5.99	3.9	1.47	1.93
1301	FBtr0343585	protein_coding_gene	FBgn0002723	Met	Methoprene-tolerant	CG1705	mRNA	FBtr0343585	Met-RB		15.85	25.35	4.42	2.91	8.38	7.28	7.37	12.18	2.07	8.81	7.53	3.93	23.8	0	7.68	7.12	1.18	0.45	8.16	33.86	12.25	12.23	11.54	20.2	59.21	6.74	17.45	22.78	2.98	13.04	6.96	15.04	24.72	32.39	37.36	0	0	0	0
1302	FBtr0084956	protein_coding_gene	FBgn0002732	E(spl)mα-BFM	Enhancer of split mα, Bearded family member	CG8337	mRNA	FBtr0084956	E(spl)mα-BFM-RA		0	0	0	0	0	0	0	0	0	0	0	0	0	0	0	0	0	0	0	0	0	0	0	0	0	0	0	0	0	0	0	0	0	0	0	0	0	0	0
1303	FBtr0084982	protein_coding_gene	FBgn0002733	E(spl)mβ-HLH	Enhancer of split mβ, helix-loop-helix	CG14548	mRNA	FBtr0084982	E(spl)mβ-HLH-RA		0	0	0	0	0	0	0	0	0	0	6.43	0	0	0	0	0	0	0	0	0	0	0	0.14	0	0	0	0.67	0	0	0	0	7.31	0	0	0	0	0	0	0
1304	FBtr0084954	protein_coding_gene	FBgn0002734	E(spl)mδ-HLH	Enhancer of split mδ, helix-loop-helix	CG8328	mRNA	FBtr0084954	E(spl)mδ-HLH-RA		2.24	1.07	0	0	0	0	10.78	0	0	0	0.64	0.15	0	0	5.49	0	0	0.47	0.14	0	19.06	5.14	4.8	1.15	0	0	0	0	0	0	0	0	0.18	272.25	0	0	8.29	0	0
1305	FBtr0084955	protein_coding_gene	FBgn0002735	E(spl)mγ-HLH	Enhancer of split mγ, helix-loop-helix	CG8333	mRNA	FBtr0084955	E(spl)mγ-HLH-RA		0	0	0	0	0	0	0	0	0	0	0.17	1.49	0	0	0	0	0	0	0	0	13.06	0.38	0	0	0	0	0	0	0	0	0	0	9.4	0	0	0	0	0	0
1306	FBtr0071569	protein_coding_gene	FBgn0002736	mago	mago nashi	CG9401	mRNA	FBtr0071569	mago-RA		28.19	61.22	21.42	7.34	0	13.69	37.73	27.5	6.49	11.27	8.29	1.66	7.85	0.1	25.49	13.81	43.31	0	1.6	80.04	25.53	19.61	8.62	32.48	47.22	1.13	5.87	14.64	0.24	71.18	13.03	15.49	12.22	9.43	44.86	4.91	30.64	35.27	26.65
1307	FBtr0085195	protein_coding_gene	FBgn0002772	Mlc1	Myosin alkali light chain 1	CG5596	mRNA	FBtr0085195	Mlc1-RA		0	0.05	0	0	0	0	0	0	0	0	0	0	0	0	0	0	0	0	0	0	0	0	0	0	0	0	0	0.16	0	0	0	0	0	0	0	0	0	0	0
1308	FBtr0085196	protein_coding_gene	FBgn0002772	Mlc1	Myosin alkali light chain 1	CG5596	mRNA	FBtr0085196	Mlc1-RB		0	0	0	0	0	0	0	0	0	0	0.55	0	0	0	0	0	0	0	0	0	0	0	4.89	0	0	0	33.74	0	0	0	0	6.71	0	0	0	0	0	0	0
1309	FBtr0344131	protein_coding_gene	FBgn0002772	Mlc1	Myosin alkali light chain 1	CG5596	mRNA	FBtr0344131	Mlc1-RD		0	0	0	0	0	0	0	0	0	0	0.23	0	0	0	0	1	0	0	0	0	0.13	0	0.13	0	0	0	9.53	0	0	0	0	0.07	0	0	0.64	0	0	0	0
1310	FBtr0089747	protein_coding_gene	FBgn0002773	Mlc2	Myosin light chain 2	CG2184	mRNA	FBtr0089747	Mlc2-RA		0.05	0.95	1.51	0	0.55	0	0	0	0	0.16	1.1	16.08	0	0.87	0.06	0	0	0	0	0	1.23	1.62	0.13	0	0	0	7.36	0.72	0	0	0	0.5	0.04	1.85	2.27	0	0	0	0
1311	FBtr0086031	protein_coding_gene	FBgn0002774	mle	maleless	CG11680	mRNA	FBtr0086031	mle-RA		19.5	16.02	11.55	19.05	0.07	1.02	0.43	13.86	2.28	10.58	4.2	4.47	4.62	0	23.37	35.89	4.69	5.42	0	0	5.35	0.69	0	16.55	0	40.79	2.57	10.58	0	8.32	6.61	3.3	9.59	0	15.31	0.12	0	0	0
1312	FBtr0100576	protein_coding_gene	FBgn0002774	mle	maleless	CG11680	mRNA	FBtr0100576	mle-RC		21.86	20.8	11.18	1.84	0.4	2.45	6.89	16.41	7.58	18.9	6.41	0	11.34	56.67	5.9	14.3	0	5.92	4.9	0.1	4.96	10.5	19.99	13.05	0.23	0.32	1.91	11.67	20.74	8.03	15.45	7.01	4.92	0	12.88	0.78	8.9	1.84	8.09
1313	FBtr0076926	protein_coding_gene	FBgn0002775	msl-3	male-specific lethal 3	CG8631	mRNA	FBtr0076926	msl-3-RA		20.04	32.66	19.86	23.55	20.94	14.43	11.3	17.18	26.97	17.02	9.66	0.14	30.85	30.38	15.47	35.7	0	0.5	0.93	1.9	14.79	1.64	17.62	81.77	2.69	1.98	6.9	10.86	7.67	58.53	69.05	17.92	6.31	0.89	25.43	31.02	4.35	0	10.62
1314	FBtr0075626	protein_coding_gene	FBgn0002778	mnd	minidiscs	CG3297	mRNA	FBtr0075626	mnd-RC		0	0.28	2.7	0	0	0	0	0	0	0	5.27	0.11	25.85	0	1.12	0.92	0	0	0	0	0	0.36	7.44	3.12	0	1.36	0.26	0	0	0.24	0	3.47	5.07	0	1.26	0	0	0	0
1315	FBtr0075627	protein_coding_gene	FBgn0002778	mnd	minidiscs	CG3297	mRNA	FBtr0075627	mnd-RA		2.05	2.65	0	3.91	0	3.78	0	0	0	0.34	9.7	0	0	0	0	0.16	0	0	0	0	4.05	0	0.9	10.46	0	0	0	0	0	0	0	0.73	0.36	0	8.28	0	0	0	0
1316	FBtr0114529	protein_coding_gene	FBgn0002778	mnd	minidiscs	CG3297	mRNA	FBtr0114529	mnd-RD		0	0	0	0	0	0	0.88	4.07	0	0	3.44	0	0	0	8.03	0	0	0	0.13	0	0	2.33	6.94	0.71	2.24	0	1.15	0	0	0	0	19.91	8.4	0	0	0	0	0.84	0
1317	FBtr0085874	protein_coding_gene	FBgn0002780	mod	modulo	CG2050	mRNA	FBtr0085874	mod-RA		7.76	3.34	10.32	9.44	0	0	0	3.62	2.5	0.34	5.19	15.66	0	0	0	1.04	0	0	0	0	3.23	11.01	0.53	0.73	0	0	14.15	3.89	0.11	0.32	0	1.8	3.97	2.71	12.47	0	0	7.39	10.15
1318	FBtr0310268	protein_coding_gene	FBgn0002780	mod	modulo	CG2050	mRNA	FBtr0310268	mod-RC		4.19	7.44	0	0	0.05	5.72	1.85	29.67	0	14.73	5.97	0	1.58	39.19	26.95	9.73	18.3	4.68	0.27	0	13.52	6.15	6.71	57.39	29.15	0.11	0.25	11.97	0	40.08	19.3	22.12	39.92	0	35.49	53.29	8.3	1.49	2.76
1319	FBtr0084060	protein_coding_gene	FBgn0002781	mod(mdg4)	modifier of mdg4	CG32491	mRNA	FBtr0084060	mod(mdg4)-RA		5.11	9.85	10.72	0	0.3	0	0.97	14.26	3.85	2.8	3.74	5.86	5.9	2.4	0.49	2.24	0	0	2.6	0	4.93	5.21	3.81	1.61	1.01	0	0	24.68	0.17	0	2.54	1.48	33.42	0	21.92	0	0	4.53	0
1320	FBtr0084061	protein_coding_gene	FBgn0002781	mod(mdg4)	modifier of mdg4	CG32491	mRNA	FBtr0084061	mod(mdg4)-RB		2.49	3.26	7.83	0	0	0	0	2.35	4.25	8.37	0	0.04	5.56	0	8.93	12.54	0.18	2.26	0	0	0	0	14.89	0	54.16	0	0	0.09	6	0	0.9	20.75	0	0	2.57	0	0	0	0
1321	FBtr0084062	protein_coding_gene	FBgn0002781	mod(mdg4)	modifier of mdg4	CG32491	mRNA	FBtr0084062	mod(mdg4)-RC		14.46	24.16	0.74	0	0	0	0	49.38	2.65	31.63	11.31	5.31	0	0	0.46	29.64	0	0	0	0	12.89	4.23	1.83	18.15	48.5	0	3.61	22.44	164.41	0.27	13.45	4.5	5.93	0.42	10.95	20.46	0	1.54	0
1322	FBtr0084063	protein_coding_gene	FBgn0002781	mod(mdg4)	modifier of mdg4	CG32491	mRNA	FBtr0084063	mod(mdg4)-RD		5.99	7.1	27.76	0	0	4.94	0	3.6	0.27	8.52	2.46	0	2.01	0	0.72	0	0.53	0	0	0	0	0	0.64	2.37	0	0	0	0	28.3	0	11.59	0	29.66	0	2.88	0	0	0	1.65
1323	FBtr0084064	protein_coding_gene	FBgn0002781	mod(mdg4)	modifier of mdg4	CG32491	mRNA	FBtr0084064	mod(mdg4)-RE		5.93	5.66	1.08	44.13	0	0.45	0	0.68	2.55	4.44	0.1	0	0	12.37	1.66	0	0.62	6.51	0	0	0	0	0	19.33	0	0	0	2.42	0	0	0	0	0	0	0	0	0	0	0
1324	FBtr0084065	protein_coding_gene	FBgn0002781	mod(mdg4)	modifier of mdg4	CG32491	mRNA	FBtr0084065	mod(mdg4)-RF		20.37	20.01	3.79	0.55	0	0	0.67	3.65	0.32	3.39	3.66	0	18.21	0	8	4.21	0	0	0.49	1.39	16.49	1.12	1.04	0.21	3.54	0	0	17	0	5.84	2.81	0.14	6.73	0	10.14	0	0	0.45	0.37
1325	FBtr0084066	protein_coding_gene	FBgn0002781	mod(mdg4)	modifier of mdg4	CG32491	mRNA	FBtr0084066	mod(mdg4)-RG		3.37	7.6	0	2.77	0	7.14	0	1.08	1.77	2.16	2.38	0	53.55	2.72	0	0	0	0	0	0	0	0	0.81	0	125.33	0	7.85	8.39	2.21	0.62	68.89	2.82	0	0	0	0	0	0	0
1326	FBtr0084067	protein_coding_gene	FBgn0002781	mod(mdg4)	modifier of mdg4	CG32491	mRNA	FBtr0084067	mod(mdg4)-RH		0	3.1	0.28	0	0	0	0	0	12.35	0.27	1	0	14.6	0.44	0.53	0	0	0.2	0	0	0	38.12	8.36	49.41	0	0	0	16.03	0	0	4.14	0	49	0	6.42	0	2.62	0	0
1327	FBtr0084068	protein_coding_gene	FBgn0002781	mod(mdg4)	modifier of mdg4	CG32491	mRNA	FBtr0084068	mod(mdg4)-RI		2.2	3.89	0.42	0	0.52	0	0	0	11.36	0.93	2.12	0	0	0	1.96	4.24	0	0	0	0	0	0	0	0	0	0	0	0.23	0	0	1.78	0	9.99	0	0	0	0	0	0
1328	FBtr0084069	protein_coding_gene	FBgn0002781	mod(mdg4)	modifier of mdg4	CG32491	mRNA	FBtr0084069	mod(mdg4)-RJ		6.61	8.09	7.6	68.4	0	0	58.6	71.42	2.15	4.56	1.18	0	0	0	13.35	3.65	0	0	0	0.48	3.32	0	0	0	0.45	0	3.69	0	0	0	2.33	7.6	0.93	0	0	0	0	13.08	0
1329	FBtr0084070	protein_coding_gene	FBgn0002781	mod(mdg4)	modifier of mdg4	CG32491	mRNA	FBtr0084070	mod(mdg4)-RK		30.49	29.88	23.43	35.89	0	0	0	25.29	59.36	17.4	8.82	0	0	0	45.15	48.42	0	0	8.88	0	0	0	0	24.31	0.51	56.83	16.64	18	0	51.46	9.27	7.38	0	119.19	18.37	0	6.2	0.56	0
1330	FBtr0084071	protein_coding_gene	FBgn0002781	mod(mdg4)	modifier of mdg4	CG32491	mRNA	FBtr0084071	mod(mdg4)-RL		0	0.66	0	0	0	0	0	1.73	0	0	0	0	0	0	0	0	0	0	0	0	0	0	0	15.81	0	0	0	0	0	0	0	0	0	0	0.35	0	0	0	0
1331	FBtr0084072	protein_coding_gene	FBgn0002781	mod(mdg4)	modifier of mdg4	CG32491	mRNA	FBtr0084072	mod(mdg4)-RM		5.25	21.14	7.35	7.81	0	0	0	0	0	3.31	3.1	10.05	25.31	0.8	0	0	0.5	0.35	0	0	0.17	0.18	1.47	0.27	0	0	0.17	2.06	0.61	0.12	0	0	0	0	5.12	0	1.03	0	0.43
1332	FBtr0084073	protein_coding_gene	FBgn0002781	mod(mdg4)	modifier of mdg4	CG32491	mRNA	FBtr0084073	mod(mdg4)-RN		35.95	65.8	52.19	0	12.34	28.43	0	20.3	16.06	40.3	8.39	0	0	0	39.32	0	0.32	0	0	0.32	10.64	0	0	2.48	15.83	0.26	0.48	29.12	1.2	29.12	17.2	21.25	0	1.74	0.83	0	0	0.2	0
1333	FBtr0084074	protein_coding_gene	FBgn0002781	mod(mdg4)	modifier of mdg4	CG32491	mRNA	FBtr0084074	mod(mdg4)-RO		2.79	0.78	1.03	0	0	0	0	1.72	9.75	0.36	0.13	0	23.76	42.11	0.32	0	0	0	0	0	0	0	0	0	0	0	0	0	0	2.1	0	0	0	0	16.95	0	0	0	0
1334	FBtr0084075	protein_coding_gene	FBgn0002781	mod(mdg4)	modifier of mdg4	CG32491	mRNA	FBtr0084075	mod(mdg4)-RP		25.22	14.48	20.81	0	0	10.9	0	8.74	0	0.83	4.05	0	55.37	0	0	0	0	0	0	5.69	0	3.33	1.52	4.22	0	0	0.66	0	12.23	0.35	54.22	7.29	10.56	0	0	0	0	0	14.93
1335	FBtr0084077	protein_coding_gene	FBgn0002781	mod(mdg4)	modifier of mdg4	CG32491	mRNA	FBtr0084077	mod(mdg4)-RR		11.29	9.73	0	0	0	30.8	2.31	21.78	0	8.56	2.78	2.45	9.61	0	55.08	4.92	0	8.23	1.01	0	3.29	5.32	0.63	22.22	0	0	0	17.26	0	0.45	0	0	5.02	0	6.24	0	0	0	0
1336	FBtr0084078	protein_coding_gene	FBgn0002781	mod(mdg4)	modifier of mdg4	CG32491	mRNA	FBtr0084078	mod(mdg4)-RS		7.58	15.22	4.9	0	0	5.42	0	16.46	0	6.84	3.53	0	8.29	1.9	2.55	33.8	1	0	0	9.67	4.78	55.27	0	11.53	0	1.01	12.51	1.5	0.56	4.15	6.5	7.6	8.12	0	2.18	6.48	1.7	0	4.29
1337	FBtr0084079	protein_coding_gene	FBgn0002781	mod(mdg4)	modifier of mdg4	CG32491	mRNA	FBtr0084079	mod(mdg4)-RT		50.27	7.86	35.45	0	0	0	1.61	45.96	1.73	75.27	3.08	0	6.19	0	52.42	0.54	1.12	1.73	6.72	9.57	0	35.54	2.29	59.3	64.41	2.71	0	2.94	11.48	3.63	3.45	12.44	0.87	0	16.84	0	0	0	0
1338	FBtr0084080	protein_coding_gene	FBgn0002781	mod(mdg4)	modifier of mdg4	CG32491	mRNA	FBtr0084080	mod(mdg4)-RU		0	2.92	0	0	0	0.12	0	0.61	3.91	5.82	1.39	0	0	17.32	5.96	0	0	0	0	0	0	1.07	0	7.24	0	0	0	0	12.26	0.34	0.32	0.22	33.27	0.33	0.4	0	0	0	0
1339	FBtr0084081	protein_coding_gene	FBgn0002781	mod(mdg4)	modifier of mdg4	CG32491	mRNA	FBtr0084081	mod(mdg4)-RV		16.43	7.99	7.5	27.9	0	0	0	0	6.25	15.15	2.36	0	1.06	0	0	0	0	2.03	0	3.2	27.49	0	1	1.9	0.58	0	0	4.6	0	0	0	0	37.57	0	0	0	0	0	0
1340	FBtr0084082	protein_coding_gene	FBgn0002781	mod(mdg4)	modifier of mdg4	CG32491	mRNA	FBtr0084082	mod(mdg4)-RW		0.07	0	0	0.9	0	0	0	4.69	15.5	8.47	0	0	38.09	11.55	0	7.66	0	0.17	0	0	2.37	0	6.61	108.64	0	0	71.68	3.2	0	0	0.14	0	0.29	1.94	26.73	0	0	0	0
1341	FBtr0084083	protein_coding_gene	FBgn0002781	mod(mdg4)	modifier of mdg4	CG32491	mRNA	FBtr0084083	mod(mdg4)-RX		0	0	10.77	0	0	0	0	23.55	0	0	0	0	0	0	17.46	24.83	0	0	0	0	0	0	0	0	0	0	0	0	0	41.6	8.07	0	0	0	22.75	0	0	0	0
1342	FBtr0084084	protein_coding_gene	FBgn0002781	mod(mdg4)	modifier of mdg4	CG32491	mRNA	FBtr0084084	mod(mdg4)-RY		0	0	0	0	56.15	0	0	0	0	0	0	0	0	0	0	0	0	0	0	0	0	0	0	0	0	0	0	1.14	41.91	0	0	0	0	0	0	0	0	0	0
1343	FBtr0084085	protein_coding_gene	FBgn0002781	mod(mdg4)	modifier of mdg4	CG32491	mRNA	FBtr0084085	mod(mdg4)-RZ		0.23	0.64	16.52	4.46	22.12	25.85	0	0	2.15	0.45	1.2	0	0	0	12.96	0.18	0	0	0	0	16.61	17.84	0	0.52	0	0	14.96	0	0.58	6.58	0	0.6	0.33	0	12.38	0	0	0	0
1344	FBtr0114359	protein_coding_gene	FBgn0002781	mod(mdg4)	modifier of mdg4	CG32491	mRNA	FBtr0114359	mod(mdg4)-RAA		0.57	0.68	1.45	0	0	0	0	2.53	0	0	0.27	0	0	0	10.64	0	0	0	0	0	0	0	1.39	0	0	0	0	0	0	0	0	0	0	0	0	0	1.39	0	0
1345	FBtr0114360	protein_coding_gene	FBgn0002781	mod(mdg4)	modifier of mdg4	CG32491	mRNA	FBtr0114360	mod(mdg4)-RAB		1.51	3.8	1.3	0	0	0	39.95	0	0	0	1.36	0	0	0	6.68	0	0	0	0	0	0	0	2.88	0	0	0	0	60.41	0	2.64	0	0	0	0	0	0	0	4.64	0
1346	FBtr0114361	protein_coding_gene	FBgn0002781	mod(mdg4)	modifier of mdg4	CG32491	mRNA	FBtr0114361	mod(mdg4)-RAC		15.69	12.54	16.93	1.43	20.55	7.24	8.15	3.11	0	16.27	2.12	3.74	88.44	0	11.17	42.48	0	2.46	0.11	0	30.78	14.44	0.73	50.8	0	0.19	12.59	9.62	0	10.26	9.14	6.63	11.32	0	3.85	0	0.2	2.36	3.93
1347	FBtr0307759	protein_coding_gene	FBgn0002781	mod(mdg4)	modifier of mdg4	CG32491	mRNA	FBtr0307759	mod(mdg4)-RAD		0	0	0	0.39	0	0	0	0	0	0	0	0	0	0	0	0	0	0	0	0	0	0	0	10.76	9.95	0	0	2.68	0	0	0	7.08	0	0	0	0	0	0	0
1348	FBtr0307760	protein_coding_gene	FBgn0002781	mod(mdg4)	modifier of mdg4	CG32491	mRNA	FBtr0307760	mod(mdg4)-RAE		0	0	0	0	0	0	0	0	0	0	0	0	0	0	0	0	0	0	0	0	0	0	0	0	0	0	0	0	0	0	0	0	0	0	0	0	0	0	0
1349	FBtr0343765	protein_coding_gene	FBgn0002781	mod(mdg4)	modifier of mdg4	CG32491	mRNA	FBtr0343765	mod(mdg4)-RAF		12.98	7.61	11.98	8.79	0	0	0	11.28	2.12	4.03	2.96	0	0	0	3.39	16.51	9.63	6.99	0	0	1.39	0	5.31	0	0	0	0.79	0	0	0	9.8	19.32	3.46	0	24.15	0	0	0.57	0
1350	FBtr0083238	protein_coding_gene	FBgn0002783	mor	moira	CG18740	mRNA	FBtr0083238	mor-RA		29.25	36.39	33.44	14.79	15.03	0.42	22.74	18.98	12.9	26.03	2.03	0.79	1.8	0	4.51	35.09	0.98	1.91	0	0	1.29	3.84	2.31	4.36	1.75	5.93	0.88	3.65	14.87	0.55	2.73	1.75	3.01	7.75	4.06	0	0	0	0
1351	FBtr0302550	protein_coding_gene	FBgn0002783	mor	moira	CG18740	mRNA	FBtr0302550	mor-RB		4.56	0	5.12	0	38.34	6.97	0	8.77	0	15.87	3.19	0	0	0	29.5	0	0	3.46	0.03	1.87	0.04	0	0	9.56	39.67	10.37	4.83	5.31	0	14.16	0	10.8	9.84	0	20.48	0.06	2.43	0.43	3.83
1352	FBtr0072290	protein_coding_gene	FBgn0002787	Rpn8	Regulatory particle non-ATPase 8	CG3416	mRNA	FBtr0072290	Rpn8-RA		3.25	9.46	6.83	8.72	0	0	14.51	7.62	5.73	15.06	8.81	6.74	0	0	11.3	20.77	0.05	3.82	0.35	0.05	14.07	0	1.66	9.21	0	0	7.01	14.39	0.31	10.28	1.53	3.38	4.36	0	0	0	8.04	13.47	8.87
1353	FBtr0330237	protein_coding_gene	FBgn0002787	Rpn8	Regulatory particle non-ATPase 8	CG3416	mRNA	FBtr0330237	Rpn8-RB		3.25	9.46	6.83	8.72	0	0	14.51	7.62	5.73	15.06	8.81	6.74	0	0	11.3	20.77	0.05	3.82	0.35	0.05	14.07	0	1.66	9.21	0	0	7.01	14.39	0.31	10.28	1.53	3.38	4.36	0	0	0	8.04	13.47	8.87
1354	FBtr0332921	protein_coding_gene	FBgn0002787	Rpn8	Regulatory particle non-ATPase 8	CG3416	mRNA	FBtr0332921	Rpn8-RC		0	0	0	0	0	0	0	0	0	0	0	0	0	0	0	0	0	0	0	0	0	0	0	0	0	0	0	0	0	0	0	0	0	0	38.01	0	0	0	0
1355	FBtr0087745	protein_coding_gene	FBgn0002789	Mp20	Muscle protein 20	CG4696	mRNA	FBtr0087745	Mp20-RA		0	0	0	0	0	0	0	0	0	0	2.27	0	0	0	0	0	0	0	0	0	0	0	2.68	0	0	0	90.51	0	0	1.16	0	0	0	0	0	0	0	0	0
1356	FBtr0345532	protein_coding_gene	FBgn0002789	Mp20	Muscle protein 20	CG4696	mRNA	FBtr0345532	Mp20-RC		0	0	0	0	0	0	0	0	0	0	0	0	0	0	0	0	0	0	0	0	0	0	0	0	0	0	0	0	0	0	0	0	0	0	0.92	0	0	0	0
1357	FBtr0072156	protein_coding_gene	FBgn0002791	mr	morula	CG3060	mRNA	FBtr0072156	mr-RA		10.47	12.8	11.72	1.23	0	0.03	5.38	8.83	1.31	10.77	2.6	0	0	1.12	1.29	0.05	0.43	3.89	1.15	0	5.94	10.14	2.17	0.18	0	0	5.1	4.37	0.15	5.78	1.55	3.39	2.62	0	2.09	3.63	1.28	0.13	4.9
1358	FBtr0085063	protein_coding_gene	FBgn0002838	ms(3)K81	male sterile (3) K81	CG14251	mRNA	FBtr0085063	ms(3)K81-RA		0	0	0	0	0	0	0	0	0	0	0	0	0	0	0	0	0	0	0	0	0	0	0	0	0	0	0	0	0	0	0	0	0	0	0	0	0	0	0
1359	FBtr0078401	protein_coding_gene	FBgn0002842	sa	spermatocyte arrest	CG11308	mRNA	FBtr0078401	sa-RA		4.44	0.63	11.36	0	0	0	0	2.86	1.89	2.99	0.59	0	0	0	0.15	0	0	0	0	0	0	0	0	0	20.06	0	0	7.05	0	25.9	0.97	0	55.86	0	0	0	0	0	0
1360	FBtr0079155	protein_coding_gene	FBgn0002855	Acp26Aa	Accessory gland protein 26Aa	CG8982	mRNA	FBtr0079155	Acp26Aa-RA		0	0	0	0	0	0	0	0	0	0	0	0	0	0	0	0	0	0	0	0	0	0	0	0	0	0	0	0	0	0	0	0	0	0	0	0	0	0	0
1361	FBtr0079156	protein_coding_gene	FBgn0002856	Acp26Ab	Accessory gland protein 26Ab	CG9024	mRNA	FBtr0079156	Acp26Ab-RA		0	0	0	0	0	0	0	0	0	0	0	0	0	0	0	0	0	0	0	0	0	0	0	0	0	0	0	0	0	0	0	0	0	0	0	0	0	0	0
1362	FBtr0079157	protein_coding_gene	FBgn0002856	Acp26Ab	Accessory gland protein 26Ab	CG9024	mRNA	FBtr0079157	Acp26Ab-RB		0	0	0	0	0	0	0	0	0	0	0	0	0	0	0	0	0	0	0	0	0	0	0	0	0	0	0	0	0	0	0	0	0	0	0	0	0	0	0
1363	FBtr0342618	protein_coding_gene	FBgn0002856	Acp26Ab	Accessory gland protein 26Ab	CG9024	mRNA	FBtr0342618	Acp26Ab-RC		0	0	0	0	0	0	0	0	0	0	0	0	0	0	0	0	0	0	0	0	0	0	0	0	0	0	0	0	0	0	0	0	0	0	0	0	0	0	0
1364	FBtr0082884	protein_coding_gene	FBgn0002862	Mst87F	Male-specific RNA 87F	CG17956	mRNA	FBtr0082884	Mst87F-RA		0	0	0	0	0	0	0	0	0	0	0	0	0	0	0	0	0	0	0	0	0	0	0	0	0	0	0	0	0	0	0	0	0	0	0	0	0	0	0
1365	FBtr0346062	protein_coding_gene	FBgn0002862	Mst87F	Male-specific RNA 87F	CG17956	mRNA	FBtr0346062	Mst87F-RB		0	0	0	0	0	0	0	0	0	0	0	0	0	0	0	0	0	0	0	0	0	0	0	0	0	0	0	0	0	0	0	0	0	0	0	0	0	0	0
1366	FBtr0084561	protein_coding_gene	FBgn0002863	Acp95EF	Accessory gland protein 95EF	CG17924	mRNA	FBtr0084561	Acp95EF-RA		0	0.92	0	0	0	0	0	0	0	0	0	0	0	0	0	1.48	0	3.31	0	0	0	0	0	0	0	0	0	0	0	7.39	0	0	0	0	0	0	0	0	0
1367	FBtr0085277	protein_coding_gene	FBgn0002865	Mst98Ca	Male-specific RNA 98Ca	CG11719	mRNA	FBtr0085277	Mst98Ca-RA		0	0	0	0	0	0	0	0	0	0	0	0	0	0	0	0	0	0	0	0	0	0	0	0	0	0	0	0	0	0	0.78	0	0	0	0	0	0	0	0
1368	FBtr0082158	protein_coding_gene	FBgn0002868	MtnA	Metallothionein A	CG9470	mRNA	FBtr0082158	MtnA-RA		8.84	0	7.57	0.52	0	0	0	0.76	26.77	2.61	0	0	0	0	10.43	44.53	0	29.26	0.66	0	0	0	0	0	0	0	0	8.63	0	3.24	0	0	0	0	0	0	123.59	20.32	86.11
1369	FBtr0334686	protein_coding_gene	FBgn0002868	MtnA	Metallothionein A	CG9470	mRNA	FBtr0334686	MtnA-RB		2.68	0	0	0	0	0	0	0	0	0	521.07	52.55	1.51	0	0	0	0	0	0	0	0	0	132.86	13.01	0	0	337.15	0.65	1.11	0.29	0	808.07	367.37	0	46.49	0.39	1.42	0	14.72
1370	FBtr0083890	protein_coding_gene	FBgn0002869	MtnB	Metallothionein B	CG4312	mRNA	FBtr0083890	MtnB-RA		0	0	0	0	0	0	0	0	0	0	0	0	0	0	0	0	0	0	0	0	0	0	0	0	0	0	0	0	0	0	0	0	0	0	0	0	0	0	0
1371	FBtr0346152	protein_coding_gene	FBgn0002869	MtnB	Metallothionein B	CG4312	mRNA	FBtr0346152	MtnB-RB		0	0	0	0	0	0	0	0	0	0	0	0	0	0	0	0	0	0	0	0	0	0	0	0	0	0	0	0	0	0	0	0	0	0	0	0	0	0	0
1372	FBtr0346153	protein_coding_gene	FBgn0002869	MtnB	Metallothionein B	CG4312	mRNA	FBtr0346153	MtnB-RC		0	3.71	0	0	0	0	0	0	0	0	0	0	0	0	0	0	0	0	0	0	0	0	0	0	0	0	0	0	0	0	0	0	0	0	0	0	0	0	0
1373	FBtr0072856	protein_coding_gene	FBgn0002872	mu2	mutator 2	CG1960	mRNA	FBtr0072856	mu2-RA		4.65	0	0	0	0	0	2.92	0	0	1.81	0.77	0	0	0	0	0	0	12.48	0	0	0	0	0	0	0	0	0	0	0	0	0	0	0	0	0	0	0	0	0
1374	FBtr0072857	protein_coding_gene	FBgn0002872	mu2	mutator 2	CG1960	mRNA	FBtr0072857	mu2-RB		0	1.27	12.22	0	0	0.58	0.18	8.76	1.68	6.72	0	6.87	0	0.16	3.4	0	26.35	0	0.09	15.41	9.78	4.3	1.16	0.55	0.03	1.41	2.18	0.88	0.12	2.96	0.81	0.27	7.75	0.46	7	0.19	0.07	0.73	0.38
1375	FBtr0301465	protein_coding_gene	FBgn0002872	mu2	mutator 2	CG1960	mRNA	FBtr0301465	mu2-RC		0	4.5	0	0	0	0	0	0	0	0	0.41	0	0	0	0	0	0	0	0	0	4.87	0	0	0	0	0	0	0	0	0	0	0	0	0	0	0	0	0	0
1376	FBtr0308325	protein_coding_gene	FBgn0002873	mud	mushroom body defect	CG12047	mRNA	FBtr0308325	mud-RF		0	0	0	0	0	0	0	0	0	0	0	0	0	0	0	0.03	0	0	0	0	0	0	0	0	0	0	0	0	0	0	0	0	0	0	0	0	0	0	0
1377	FBtr0308326	protein_coding_gene	FBgn0002873	mud	mushroom body defect	CG12047	mRNA	FBtr0308326	mud-RG		0	0	0	0	0	0	0	0	0	0	0	0	0	0	0	0	0	0	0	0	0	0	0	0	0	0	0	0	0	0	0	0	0	0	0	0	0	0	0
1378	FBtr0308327	protein_coding_gene	FBgn0002873	mud	mushroom body defect	CG12047	mRNA	FBtr0308327	mud-RH		0	0	0	0	0	0	0	0	0	0	0	0	0	0	0	0	0	0	0	0	0	0	0	0	0	0	0	0	0	0	0	0	0	0	0	0	0	0	0
1379	FBtr0308328	protein_coding_gene	FBgn0002873	mud	mushroom body defect	CG12047	mRNA	FBtr0308328	mud-RI		0	0	0	0	0	0	0	0	0	0	0	0	0	0	0	0	0	0	0	0	0	0	0	0	0	0	0	0	0	0	0	0	0	0	0	0	0	0	0
1380	FBtr0308329	protein_coding_gene	FBgn0002873	mud	mushroom body defect	CG12047	mRNA	FBtr0308329	mud-RJ		0	0	0	0	0	0	0	0	0	0	0	0	0	0	0	0	0	0	0	0	0	0	0	0	0	0	0	0	0	0	0	0	0	0	0	0	0	0	0
1381	FBtr0332621	protein_coding_gene	FBgn0002873	mud	mushroom body defect	CG12047	mRNA	FBtr0332621	mud-RK		0	0.02	0	0	0	0	0	0	0.39	0.42	0	0	0	0	0	0.04	0	0	0	0	0	0	0	0	0	0	0.5	0	0	0	0	0.72	0	0	0	0	0	0	0
1382	FBtr0332622	protein_coding_gene	FBgn0002873	mud	mushroom body defect	CG12047	mRNA	FBtr0332622	mud-RL		0	0	0	0	0	0	0	0	0	0	0	0	0	0	0	0	0	0	0	0	0	0	0	0	0	0	0	0	0	0	0	0	0	0	0	0	0	0	0
1383	FBtr0073817	protein_coding_gene	FBgn0002878	mus101	mutagen-sensitive 101	CG11156	mRNA	FBtr0073817	mus101-RA		1.87	2.71	6.23	0	0.92	0.16	5.58	2.79	4.85	0.75	0.36	1.08	0.85	0.57	4.85	2.27	0.03	0.37	0	16.32	0.67	0.41	0.01	20.31	0	0	0	1.33	0.02	0.72	0.02	0.08	0.26	0	0.08	61.81	0	0.07	0
1384	FBtr0100473	protein_coding_gene	FBgn0002887	mus201	mutagen-sensitive 201	CG10890	mRNA	FBtr0100473	mus201-RC		9.46	9.93	10.15	0.94	0.71	0.11	0	4.21	2.55	6.61	1.67	18.74	255.55	38.94	19.42	23.36	1.22	0.98	0.07	13.91	1.72	3.74	6.43	0	0	0.1	0	10.42	2.15	13.93	5.98	0	6.3	0.78	5.96	9.8	2.24	0	0.94
1385	FBtr0346117	protein_coding_gene	FBgn0002887	mus201	mutagen-sensitive 201	CG10890	mRNA	FBtr0346117	mus201-RD		0	0	3.17	0.88	0	0	6.07	0	0	0	2.07	0	0	0	4.75	0	0	0	0	0	0	0	0	6.74	7.31	0	6.92	0	0	0	0	6.82	0	0	2.28	0	0	0	0
1386	FBtr0088831	protein_coding_gene	FBgn0002891	DNApol-ζ	DNA polymerase zeta catalytic subunit	CG1925	mRNA	FBtr0088831	DNApol-ζ-RA		3.81	1.53	0.57	0.45	0.78	1.43	0.29	1.8	0.25	1.45	0.52	1.41	0.91	28.94	3.07	0.09	1.48	0.06	0.08	0	0.96	1.11	0.79	0.27	0.05	0	0.62	6.14	3.47	5.92	0.36	0.44	1.38	0	4.68	0.03	0.18	0	2.14
1387	FBtr0076689	protein_coding_gene	FBgn0002899	mus301	mutagen-sensitive 301	CG7972	mRNA	FBtr0076689	mus301-RA		0.36	0.47	0.03	0	16.45	0	0	0.08	0	2.84	0.06	0.04	0	0	0.7	0	0	1.53	0	0	0.32	0	0	0	0	8.44	0.37	0	0	0	0	0	0	2.41	0.69	0	0.26	0	0
1388	FBtr0075122	protein_coding_gene	FBgn0002901	mus304	mutagen-sensitive 304	CG7347	mRNA	FBtr0075122	mus304-RA		1.3	1.3	1.8	0	0	0	0	0.3	0	0.17	0.29	0	0	0	1.21	0	0	0	0	0	0	0	0	0.11	0	0	0.19	5.45	0	0.16	0.21	0.87	0.07	0	0	0	0	6.61	0
1389	FBtr0082662	protein_coding_gene	FBgn0002905	DNApol-θ	DNA polymerase theta	CG6019	mRNA	FBtr0082662	DNApol-θ-RA		1.55	2.24	1.45	7.42	0.23	0	0	3.71	0.25	0.91	0.32	2.57	0	10.99	2.78	0.62	0.02	0.07	0.98	0	2.39	2.6	0.16	1.56	0	0.09	0.22	0.11	0.02	9.48	0.56	1.14	0.34	0	4.92	0	0.4	0.05	0
1390	FBtr0082434	protein_coding_gene	FBgn0002906	Blm	Bloom syndrome helicase	CG6920	mRNA	FBtr0082434	Blm-RA		7.59	5.56	16.5	1.47	0	2.39	1.3	7.67	11.37	9.28	2.14	0.25	2.19	0.04	3.32	10.71	0.03	0.49	19.46	0.03	5.9	4.85	1.62	0.97	2.1	0.04	0.22	7.56	0.15	4.49	0.84	3.79	0.02	23.64	1.88	0	0.06	0.27	0.99
1391	FBtr0076839	protein_coding_gene	FBgn0002909	mus312	mutagen-sensitive 312	CG8601	mRNA	FBtr0076839	mus312-RA		0	0	0	1.05	0	1.91	1.09	0	3.3	0	0	11.55	0	2.25	0	2.99	0	0.57	8.11	0	1.08	7.06	0	0	8.2	0.02	3.12	2.8	0.12	0	0.57	0	2	30.45	4.13	0	0	0.04	0.08
1392	FBtr0299690	protein_coding_gene	FBgn0002909	mus312	mutagen-sensitive 312	CG8601	mRNA	FBtr0299690	mus312-RD		0.23	0	1.95	0	0	0	0	0	0	0	0.56	0	0	0	0	0	0	0	0	0	0	0	0	0	0	0	0	0	0	0	0	0	0	0	0	0	0	0	0
1393	FBtr0344453	protein_coding_gene	FBgn0002909	mus312	mutagen-sensitive 312	CG8601	mRNA	FBtr0344453	mus312-RE		4.5	5.43	1.61	11.17	2.99	0	0	6.39	0	4.34	0.8	0	0	0	5.16	0	0	0	0	0	0	0	0.31	1.48	0	0	0	0	0	5.55	0	7.55	0	0	0	0	0	0	0
1394	FBtr0074169	protein_coding_gene	FBgn0002914	Myb	Myb oncogene-like	CG9045	mRNA	FBtr0074169	Myb-RA		24.54	32.57	19.15	18.52	1.02	4.52	3.17	28.14	6.04	19.42	7.78	45.38	13.71	0	13.11	41.62	2.38	3.27	10.81	0	5.24	5.66	2.8	0	3.94	1.61	7.74	13.8	0	5.58	0.37	14.61	26.38	0	32.04	2.86	0	0	0
1395	FBtr0074170	protein_coding_gene	FBgn0002914	Myb	Myb oncogene-like	CG9045	mRNA	FBtr0074170	Myb-RB		0	0.42	0	0	0	0	0	0	0.41	0	0	0	0	0	7.92	0	0	0	0	8.58	0	0.06	0	0	0	0	0	0	0	20.1	6.64	0	0	1.6	9.81	3.48	8.2	1.22	5.41
1396	FBtr0074171	protein_coding_gene	FBgn0002914	Myb	Myb oncogene-like	CG9045	mRNA	FBtr0074171	Myb-RD		0	0	0.49	0.51	0.13	0	1.61	0	0	2.39	0.58	0	0	0	0	10.07	0.34	0	0	0	0	0	0.32	2.36	0	0	2.06	0	0	0	0	0	0	0	3.08	0	0	0	2.09
1397	FBtr0074173	protein_coding_gene	FBgn0002914	Myb	Myb oncogene-like	CG9045	mRNA	FBtr0074173	Myb-RE		4.73	2.59	4.49	0.15	0	0.16	1.73	7.48	2.78	2.69	6.71	14.14	34.94	0	0.38	0.91	0	3.5	0.19	0.76	14.85	9.05	3.07	15.23	1.85	0.22	12.36	8.06	4.91	0.31	5.5	6.34	15.76	0	8.95	0	0	0	0
1398	FBtr0344822	protein_coding_gene	FBgn0002917	na	narrow abdomen	CG1517	mRNA	FBtr0344822	na-RF		28.52	37.73	31.01	13.03	7.43	7.51	30.19	47.09	37.51	53.45	8.18	15.44	46.49	57.11	16.24	35.89	7.82	24.03	12.27	27.16	16.83	16.21	13.27	80.63	32.44	16.92	19.56	28.35	9.99	15.26	34.41	15.13	17.51	14.65	29.12	26.83	3.11	3.77	3.37
1399	FBtr0344823	protein_coding_gene	FBgn0002917	na	narrow abdomen	CG1517	mRNA	FBtr0344823	na-RG		11.78	1.77	12.18	12.49	26.64	24.63	12.12	17.4	26.22	0.7	0	0	0	0	29.57	0	0	0	0	1.2	0	0	0	0	0	0	0	15.63	2.16	75.23	0	0	0	0	0	0	0	0	0
1400	FBtr0089509	protein_coding_gene	FBgn0002921	Atpα	Na pump α subunit	CG5670	mRNA	FBtr0089509	Atpα-RC		0	0	0	0	0	0	0	0	0	0	0	0	0	2147.17	0	0	0	0	0	0	0	0	0	0	0	0	0	0	0	0	0	0	0	0	0	0	0	0	0
1401	FBtr0089510	protein_coding_gene	FBgn0002921	Atpα	Na pump α subunit	CG5670	mRNA	FBtr0089510	Atpα-RA		0	0	0	0	0	0	0	0	0	0	0	0	0	0	0	0	0	0	0	0	0	0	0	0	0	0	0	0	0	0	0	0	0	0	0	0	0	0	0
1402	FBtr0089511	protein_coding_gene	FBgn0002921	Atpα	Na pump α subunit	CG5670	mRNA	FBtr0089511	Atpα-RB		130.45	171.54	0	0	0	0	0	32.26	188.42	0	0	0	0	0	424.48	510.95	0	0	0	0	0	0	0	0	0	0	0	542.58	0	222.62	215.44	0	0	0	15.81	0	0	0	0
1403	FBtr0089512	protein_coding_gene	FBgn0002921	Atpα	Na pump α subunit	CG5670	mRNA	FBtr0089512	Atpα-RD		332.08	380.64	319.53	263.16	169.29	158.62	352.09	549.72	271.21	389.41	100.54	565.19	444.34	725.09	394.21	232.32	366.24	236.24	163.44	725.16	277.31	301.49	384.1	278.74	522.36	75.42	188.61	293.73	437.8	404.77	187.01	221.37	186.23	588.72	163.6	1009	12.88	16.85	14.78
1404	FBtr0089513	protein_coding_gene	FBgn0002921	Atpα	Na pump α subunit	CG5670	mRNA	FBtr0089513	Atpα-RE		0.73	2.22	3.56	3.76	0.29	0.44	2.41	2.49	1.66	3.19	13.84	5.24	9.45	0	2.32	4.38	0.46	0.23	1.47	0.44	11.19	4.13	4.34	36.37	2.23	3.32	8.26	1.6	0.37	1.6	0	6.56	3.41	54.41	11.09	85.5	0	0	0
1405	FBtr0089514	protein_coding_gene	FBgn0002921	Atpα	Na pump α subunit	CG5670	mRNA	FBtr0089514	Atpα-RF		0	0	0	0	0	0	0	0	0	0	0	0	0	0	0	0	0	0	0	0	0	0	0	0	0	0	0	0	0	0	0	0	0	0	0	0	0	0	0
1406	FBtr0089515	protein_coding_gene	FBgn0002921	Atpα	Na pump α subunit	CG5670	mRNA	FBtr0089515	Atpα-RG		187.45	210.71	186.83	31.83	50.15	54.03	124.79	426.96	256.55	250.63	101.43	2636.26	307.55	1171.46	284.15	431.74	1195.71	662.59	2090.24	2218.28	309.11	230.01	165.7	135.79	354.35	1238.22	86.64	340.91	247.95	202.5	230.25	69.94	69.99	518.07	68.91	52.5	98.03	221.72	145.03
1407	FBtr0089516	protein_coding_gene	FBgn0002921	Atpα	Na pump α subunit	CG5670	mRNA	FBtr0089516	Atpα-RH		19.98	29.67	201.66	566.37	640.71	403.95	565	70.49	12.33	151.35	218.32	452.27	23.92	684.69	9.73	25.67	349.44	354.08	1099.34	518.46	34.48	34.59	64.34	23.71	7.01	762.2	31.2	39.85	395.45	25.78	12.37	71.37	60.13	693.06	9.58	1253.97	46.16	49.87	44.42
1408	FBtr0300191	protein_coding_gene	FBgn0002921	Atpα	Na pump α subunit	CG5670	mRNA	FBtr0300191	Atpα-RI		0	0	0	0	0	0.09	0	0.39	0	0	0.08	0	0	3.81	0	0	0	0.3	0	0	0	0	0.52	0	0	0	0	0	0.22	0.26	0	0	0	0	0	0	0	0	0
1409	FBtr0333324	protein_coding_gene	FBgn0002921	Atpα	Na pump α subunit	CG5670	mRNA	FBtr0333324	Atpα-RJ		500.82	593.88	764.52	1138.98	1157.44	1351.94	1292.16	828.43	324.35	756.58	885.58	3298.49	4475.99	2265.43	837.5	1018.76	1565.63	920.56	2434.52	2029.61	3943.69	4722.89	2958.42	3216.96	5899.35	1175.82	1461.87	600.83	785.16	708.83	607.17	882.32	1791.38	1873.62	1428.48	3247.87	463.29	303.02	418
1410	FBtr0333325	protein_coding_gene	FBgn0002921	Atpα	Na pump α subunit	CG5670	mRNA	FBtr0333325	Atpα-RK		0.88	0.18	0.59	3.05	0.05	0	2.47	0.25	0.39	0.41	0.22	0.64	0.98	2.18	0.9	1.85	0.07	0.07	1.58	0.06	0.19	0.24	0.1	5.1	0.06	0	1.66	0	0.12	6.24	15.92	4.64	0.64	0.1	0.49	0	0	0	0.2
1411	FBtr0084472	protein_coding_gene	FBgn0002922	nau	nautilus	CG10250	mRNA	FBtr0084472	nau-RA		0	0	0	0	0	0	0	0	0	0	0	0	0	0	0	0	0	0	0	0	0	0	0	0	0	0	0	0	0	0	0	0	0	0	0	0	0	0	0
1412	FBtr0301445	protein_coding_gene	FBgn0002922	nau	nautilus	CG10250	mRNA	FBtr0301445	nau-RB		0	0	0	0	0	0	0	0	0	0	0	0	0	0	0	0	0	0	0	0	0	0	0	0	0	0	3.9	0	0	0	0	0	0	0	0	0	0	0	0
1413	FBtr0085534	protein_coding_gene	FBgn0002924	ncd	non-claret disjunctional	CG7831	mRNA	FBtr0085534	ncd-RA		0.18	0	0	0	0	9.27	0	4.7	1.57	0	0	0	0	0	3.3	0	0	0	0	0	0	0	0	0	0	0	0.05	0	0	0.82	0.09	0	0.06	0	0	0	0	2.49	11.68
1414	FBtr0344976	protein_coding_gene	FBgn0002924	ncd	non-claret disjunctional	CG7831	mRNA	FBtr0344976	ncd-RB		0	0	0	0	0	0	0	0	0	0.18	0.5	0	0	0	0	0	0	0	0	0	0.14	0	0	0	0	0	0	0	0	0	0	0.08	0.19	0	0.04	0	0	0	0
1415	FBtr0076984	protein_coding_gene	FBgn0002926	ndl	nudel	CG10129	mRNA	FBtr0076984	ndl-RA		0.28	1.24	0.15	1.9	0.57	0.06	0.01	0.23	0	0.13	0.01	0.28	0	0.03	0.49	0	0	0.43	0.06	0.57	5.54	2.23	0.25	4.54	0.31	0	0	0	0	0	0.51	0	0.1	0	2.32	0.35	0	0	0
1416	FBtr0089052	protein_coding_gene	FBgn0002930	nec	necrotic	CG1857	mRNA	FBtr0089052	nec-RA		0	0	0	0	0	0	0	0	0	0	0.87	0	0	0	0	0	0	2.43	0	0	0	0	0	0	0	0	0	0	0.08	6.87	0	0	0	0	0	0	0	0	0
1417	FBtr0290323	protein_coding_gene	FBgn0002931	net	net	CG11450	mRNA	FBtr0290323	net-RB		9.37	7.21	4.34	11.05	8	1.01	3.68	5.94	1.7	2.04	1.73	18.87	0.47	0.37	0.9	6.89	0.69	7.03	18.56	7.36	5.46	5.3	2.11	12.84	2.68	0.67	8.8	7.68	3.48	2.51	6.98	3.89	3.47	37.82	15.46	32.92	0	0	0
1418	FBtr0330637	protein_coding_gene	FBgn0002931	net	net	CG11450	mRNA	FBtr0330637	net-RC		0	0	3.41	13.59	0	3.88	11.45	2.59	0	0	1.2	0	0	5.09	0	12.59	0.33	0	0	0	0	0	0	12.16	0	9.59	0	0.73	0	0	0	0	0	0	0	0	0.75	0.21	0
1419	FBtr0082001	protein_coding_gene	FBgn0002932	neur	neuralized	CG11988	mRNA	FBtr0082001	neur-RC		0	0.95	0	0.04	0	0.22	0	0	0	0	0	0	0	0	0	0	0	0	0	0	0	0	0.01	0.38	0	0	0	0	0	0.02	0	0	0	0.01	0	0	0	0	0
1420	FBtr0082002	protein_coding_gene	FBgn0002932	neur	neuralized	CG11988	mRNA	FBtr0082002	neur-RD		0	2.68	0	3.48	0	0	0.97	0	0	0	0	1.37	0	0	1.11	0	0.29	0.69	0.13	1.28	0	0.51	4.45	0	0	0	4.2	1.28	0	4.72	0	1.95	0	1.94	2.56	0	0.72	0	0.08
1421	FBtr0082003	protein_coding_gene	FBgn0002932	neur	neuralized	CG11988	mRNA	FBtr0082003	neur-RA		0	4.52	7.04	0.04	0.06	0	0	20.19	5.56	6.71	0	0	0	0	0	0	0	0	0	0	0	0	0	0	0	0	0	0	0	0	0	0	0.22	0	0	0	0	0	0
1422	FBtr0082004	protein_coding_gene	FBgn0002932	neur	neuralized	CG11988	mRNA	FBtr0082004	neur-RB		20.97	11.54	10.52	2.16	10.03	0	0	26.95	14.25	17.36	1	0	2.43	0	7.87	5.84	0	0	0	0	3.14	0.5	0	0	0	0	1.65	0	0	0	0	0.22	4.82	0	0	0	0	0	0
1423	FBtr0300414	protein_coding_gene	FBgn0002932	neur	neuralized	CG11988	mRNA	FBtr0300414	neur-RE		4.95	5.73	0.2	22.41	0	25.96	3.01	0	3.05	0.68	0	1.96	0	3.83	0.67	0	0	0.27	0	0	0.24	0	0	0	0.24	0.23	0	0	0	0	0	3.31	0	0.5	0	0.14	0.14	0	0
1424	FBtr0070523	protein_coding_gene	FBgn0002933	ng1	new glue 1	CG10781	mRNA	FBtr0070523	ng1-RA		0.52	6.9	0	0	0	0	0	0	0	0	0	0	0	0	0	0	0	0	0	0	0	0	0	85.47	0	0	0	0	0	0	0	0	472.03	0	0	0	0	0	0
1425	FBtr0078023	protein_coding_gene	FBgn0002936	ninaA	neither inactivation nor afterpotential A	CG3966	mRNA	FBtr0078023	ninaA-RA		1.46	0.71	0.31	0	99.3	0	0	1.04	2.25	3.11	0.33	1.08	0	0	1.28	0	0	0.23	0.5	0	0	0	2.86	0	0	0	0	0	0	0	0	0	38.7	0	0	0	0	0	0
1426	FBtr0082820	protein_coding_gene	FBgn0002937	ninaB	neither inactivation nor afterpotential B	CG9347	mRNA	FBtr0082820	ninaB-RA		0	1.11	0.11	0	2.25	0	0	0.07	0	0	17.78	0	0	0	0.12	0	0	0	0	0	2.03	0	4.42	0	0	0	0.11	0	0	3.48	0	9.71	0	0	0.11	0	0	0.79	0
1427	FBtr0079436	protein_coding_gene	FBgn0002938	ninaC	neither inactivation nor afterpotential C	CG5125	mRNA	FBtr0079436	ninaC-RB		0	0	0	0	0	0	0	0	0.02	0	0.79	0	0	0	0	0	0	0	0	0	0	0	0	0	0	0	0	0	0	0	0	0.63	0	0	0	0.51	0	0	0
1428	FBtr0079437	protein_coding_gene	FBgn0002938	ninaC	neither inactivation nor afterpotential C	CG5125	mRNA	FBtr0079437	ninaC-RA		0	0	0	0	0	0	0	0	0	0	0	0	0	0	0	0	0	0	0	0	0	0	2.78	0	0	0	0	0	0	0	0	1.14	0	0	0	0	0	0	0
1429	FBtr0334835	protein_coding_gene	FBgn0002938	ninaC	neither inactivation nor afterpotential C	CG5125	mRNA	FBtr0334835	ninaC-RC		0	0	0	0	0	0	0	0	0	0	1.6	0	0	0	0	0	0	0	0	0	0	0	0.17	0	0	0	0	0	0	0	0	0	0	0	0	0	0	0	0
1430	FBtr0334836	protein_coding_gene	FBgn0002938	ninaC	neither inactivation nor afterpotential C	CG5125	mRNA	FBtr0334836	ninaC-RD		0.03	0.03	0.03	0	3.71	0.02	0	0	0	0	0.05	0	0	0	0	0	0	0	0	0	1.08	0	1.49	0	0	0.81	0	0	0	0	0	6.2	0.31	0	0	0	0	0	0
1431	FBtr0081031	protein_coding_gene	FBgn0002939	ninaD	neither inactivation nor afterpotential D	CG31783	mRNA	FBtr0081031	ninaD-RA		0	0	0	0	0	0	0	0	0	0	0.23	0	0	0	0	0	0	0	0	0	0	2.2	0	0	0	0	0	0	0	0	0	0	0	0	0	0	0	0	0
1432	FBtr0302454	protein_coding_gene	FBgn0002939	ninaD	neither inactivation nor afterpotential D	CG31783	mRNA	FBtr0302454	ninaD-RB		0	0	0	0	0	0	0	0	0	0	0.01	0	0	0	0	0	0	0	0	0	0	0	0	10.13	0	0	0	0	0	0	0	0	0	0	0	0	0	0	0
1433	FBtr0083857	protein_coding_gene	FBgn0002940	ninaE	neither inactivation nor afterpotential E	CG4550	mRNA	FBtr0083857	ninaE-RA		2.61	0.35	0	0	0	0	0	1.51	0	0	56.03	0	21.54	128.24	1.65	0	0	0	4.04	0	7.98	0.12	84.83	0	0.68	0	1.03	0	0	1.7	0	237.49	21.71	0	5.98	0.45	0	0	0
1434	FBtr0084123	protein_coding_gene	FBgn0002941	slou	slouch	CG6534	mRNA	FBtr0084123	slou-RA		0	0	0	0.02	0	0	0	0	0	0	0.2	0	0	0	0	0	0	0	0	0	0	0	0	0.55	0	0	0	0	0	0	0	0	0	0	0	0	0	0	0
1435	FBtr0330389	protein_coding_gene	FBgn0002941	slou	slouch	CG6534	mRNA	FBtr0330389	slou-RB		0	0	0	0.02	0	0	0	0	0	0	0.2	0	0	0	0	0	0	0	0	0	0	0	0	0.55	0	0	0	0	0	0	0	0	0	0	0	0	0	0	0
1436	FBtr0075039	protein_coding_gene	FBgn0002945	nkd	naked cuticle	CG11614	mRNA	FBtr0075039	nkd-RA		0.51	8.67	0.15	0	0	0	0	6.04	0.82	0.84	2.65	1.32	122.15	2.73	3.28	0	0	0	0	0	0	0	4.72	24.33	149.79	0	0	1.57	0	0.76	1.43	9.98	88.01	0	1.11	0	0	0	0.65
1437	FBtr0332649	protein_coding_gene	FBgn0002945	nkd	naked cuticle	CG11614	mRNA	FBtr0332649	nkd-RB		5.66	0.15	10.4	0.2	2.03	2.91	0.09	0	0	4.03	3.72	8.32	0	311.57	67.53	47.84	0.91	9.54	1.54	9.55	34.14	16.67	8.31	138.74	60.7	120.56	16.76	0	2.01	11.21	8.58	18.24	0.29	92.51	57.99	72.8	1.7	0.14	0
1438	FBtr0332650	protein_coding_gene	FBgn0002945	nkd	naked cuticle	CG11614	mRNA	FBtr0332650	nkd-RC		0	0.44	0.74	0	0	0	0	0	0	0	1.47	0	0	0	28.12	1.28	0	0	0	0	0.77	0	0	5.36	3.31	2.68	0.78	1.46	0	0	0.57	2.37	0.1	0.55	0.64	0	0	0	0
1439	FBtr0073516	protein_coding_gene	FBgn0002948	nod	no distributive disjunction	CG1763	mRNA	FBtr0073516	nod-RA		0	0	0	0	0	0	0	0	0	0	0.09	0	0	0	0	0	0	0	0	0	0	0	0	0	0	0	0	0	0	0	0	0	0	0	0	0	0	0	0
1440	FBtr0340297	protein_coding_gene	FBgn0002948	nod	no distributive disjunction	CG1763	mRNA	FBtr0340297	nod-RB		0	0.05	0	0	0	0	0	0	0.04	0	0	0	0	0	0	0	0	0	0	0	0	0.07	0	0	0	0	0	0	0	0.05	0	0.33	0	0	0	0	0	0	0
1441	FBtr0083732	protein_coding_gene	FBgn0002962	nos	nanos	CG5637	mRNA	FBtr0083732	nos-RA		0	0	0	0	0	0	0	0	0	0.21	0	0	0	0	0	0	0	0	0	0	0	0	0	0	0	0	0	0	0	0	0	0	0	0	0	0	0	0	0
1442	FBtr0335019	protein_coding_gene	FBgn0002962	nos	nanos	CG5637	mRNA	FBtr0335019	nos-RB		0.22	0	0	0	0	0	0	0	0	0	0	0	0	0	0	0.64	0	0	1.18	10.55	0	0	0	0	0	0	0.05	0	0.54	0	0	0	0	0	0	0	0	0	0
1443	FBtr0079821	protein_coding_gene	FBgn0002973	numb	numb	CG3779	mRNA	FBtr0079821	numb-RB		21.59	34.11	29.02	3.36	0.71	0.43	31.92	16.24	12.29	10.58	13.86	62.86	3.27	123.74	11.88	20.02	17.34	19.24	16.02	75.68	42.4	16.01	12.87	73.79	7.99	94.54	29.37	25.22	28.08	31.79	22.81	20.6	37.81	0.32	32.66	84.82	3.25	0.22	0
1444	FBtr0079822	protein_coding_gene	FBgn0002973	numb	numb	CG3779	mRNA	FBtr0079822	numb-RA		0	0	0	0	0	0	1.98	0	0	0	0.08	0	0	0	5.47	0	0	0	0	0	0	0	0.06	0	0	0	0	0	0	0	0	0	0	0	0	0	0.81	0	0
1445	FBtr0339526	protein_coding_gene	FBgn0002973	numb	numb	CG3779	mRNA	FBtr0339526	numb-RD		6.77	6.57	7.63	0.22	0	0	4.72	1.34	0.07	0.78	6.27	41.68	50.12	29.08	3.34	5.55	14.93	1.83	7.81	52.81	39.26	37.73	18.01	27.33	20.9	5.43	20.67	3.89	0.38	1.21	2.24	8.92	32.55	12.52	25.15	48.02	0	0	0.68
1446	FBtr0077557	protein_coding_gene	FBgn0002985	odd	odd skipped	CG3851	mRNA	FBtr0077557	odd-RA		0	0	0	0	0	0	0	0	0	0	0.03	0	0	0	0	0	0	0	0	0	0	0	0	0.07	0	0	17.84	0	0	0	0	0	0	0	0	0	0	0	0
1447	FBtr0077673	protein_coding_gene	FBgn0002989	okr	okra	CG3736	mRNA	FBtr0077673	okr-RA		2.85	2.21	0	0	0	0	0.08	3.52	3.2	0.5	0.95	0.11	33.32	0	0	0.93	0	0	0	0	0	0.26	0.35	0	0.34	0	0.15	0	0	2.53	0	0.04	0	0	0.04	0	3.05	0	0
1448	FBtr0078836	protein_coding_gene	FBgn0003002	opa	odd paired	CG1133	mRNA	FBtr0078836	opa-RA		0	0	0	0	0	0	0	0	0	0.02	3.94	0	0	0	0	0	0	0.01	0.15	0	0	0	24.76	0	0.05	0	0	0	0	0	0	10.21	0	0	0	0	0	0	0
1449	FBtr0479794	protein_coding_gene	FBgn0003002	opa	odd paired	CG1133	mRNA	FBtr0479794	opa-RB		0	0	0	0	0	0	0	0	0	0.02	3.94	0	0	0	0	0	0	0.01	0.15	0	0	0	24.76	0	0.05	0	0	0	0	0	0	10.21	0	0	0	0	0	0	0
1450	FBtr0072152	protein_coding_gene	FBgn0003008	or	orange	CG3029	mRNA	FBtr0072152	or-RA		43.85	48.04	69.76	0	0	2.9	0	11.7	2.69	85.63	27.8	0	0	0	3.33	43.73	0	20.57	0	0	118.41	15.81	19.89	2.67	0	2.81	56.19	0.53	5.16	16.55	82.6	5.62	12.76	146.63	69.87	3.23	131.81	35.2	62.48
1451	FBtr0072047	protein_coding_gene	FBgn0003009	ord	orientation disruptor	CG3134	mRNA	FBtr0072047	ord-RA		0	0	0	0	0	0	0	0	0	0	0	0	0	0	0	0	0	0	0	0	0	0	0	0	0	0	0	0	0	0	0	0	0	0	0	0	0	0	0
1452	FBtr0343199	protein_coding_gene	FBgn0003009	ord	orientation disruptor	CG3134	mRNA	FBtr0343199	ord-RB		0	0	0	0	0	0	0	0	0	0	0.03	0	0	0	0	0	0	0	0	0	0	0	0	0	0	0	0	0	0	0	0	0	0	0	0	0	0	0	0
1453	FBtr0083784	protein_coding_gene	FBgn0003011	ort	ora transientless	CG7411	mRNA	FBtr0083784	ort-RA		0	0	0	0	0	0	0	0	0	0	5.97	0	0	0	0	0	0	0	0	0	0	0	0.93	0	0	0	0	0	0	0	0.05	2.64	0.14	0	0	0	0	0	0
1454	FBtr0081954	protein_coding_gene	FBgn0003015	osk	oskar	CG10901	mRNA	FBtr0081954	osk-RA		0	0	0	0	0	0	0	0	0	0	0	0	0	0	0	0.11	0	0	0	0	0	0	0	0	0	0	0	0	0	0	0	0.04	0	0	0	0	0	0	0
1455	FBtr0081956	protein_coding_gene	FBgn0003015	osk	oskar	CG10901	mRNA	FBtr0081956	osk-RC		0	0	0	0	0	0	0	0	0	0	0	0	0	0	0	0.11	0	0	0	0	0	0	0	0	0	0	0	0	0	0	0	0.04	0	0	0	0	0	0	0
1456	FBtr0114465	protein_coding_gene	FBgn0003016	osp	outspread	CG3479	mRNA	FBtr0114465	osp-RC		6.6	2.84	0	0	0	0	28.03	0	0	0	4.99	0	0	0	0	2.13	0	0	0	0	0	0	0.04	0	0	0	0	0	0	0	0	0	0	0	0	0	0	0	0
1457	FBtr0301494	protein_coding_gene	FBgn0003016	osp	outspread	CG3479	mRNA	FBtr0301494	osp-RD		0.24	0.04	3.16	34.63	0	0	0	0.22	0	0	0	1.08	0	0	0	0	0	0	0.39	0	0	0	0	0	0	0	0.73	0	0	0	0	0	0	0	0	12.22	0	0	0
1458	FBtr0301495	protein_coding_gene	FBgn0003016	osp	outspread	CG3479	mRNA	FBtr0301495	osp-RE		19.15	30.53	33.77	35.3	13.14	12.79	23.28	0.97	0.02	2.94	0.24	38.28	3.55	18.98	9.8	0	20.59	17.33	26.66	11.02	17.16	53.61	20.28	0.88	9.37	4.86	3.7	0.74	0.69	11.17	23.79	6.24	4.37	8.76	15.1	16.68	0.05	2.63	0.9
1459	FBtr0301496	protein_coding_gene	FBgn0003016	osp	outspread	CG3479	mRNA	FBtr0301496	osp-RF		0	0.17	0	0.76	0	1.16	0	0	0	0	0.71	0.21	0.48	0	0	0	0	0	0	0	6.14	11.82	2.09	0	0	0	0	0	0	0.07	0.08	0	4.56	0	3.58	0	0	0	0
1460	FBtr0071236	protein_coding_gene	FBgn0003023	otu	ovarian tumor	CG12743	mRNA	FBtr0071236	otu-RA		0	0	0	0	0	0	0	0	0	0	0	0	0	0	0	0	0	0	0	0	0	0	0	0	0	0	0	0	0	0	0	0	0	0	0	0	0	0	0
1461	FBtr0071237	protein_coding_gene	FBgn0003023	otu	ovarian tumor	CG12743	mRNA	FBtr0071237	otu-RB		0	0	0	0	0	0	0	0	0	0	0.06	0	0	0	0	0	0	0	0	0	0	0	0	0	0	0	0	0	0	0	0	0	0	0	0	0	0	0	0
1462	FBtr0071238	protein_coding_gene	FBgn0003023	otu	ovarian tumor	CG12743	mRNA	FBtr0071238	otu-RC		0	0	0	0	0	0	0	0	0	0	0	0	0	0	0	0	0	0	0	0	0	0	0	0	0	0	0	0	0	0	0	0	0	0	0	0	0	0	0
1463	FBtr0333146	protein_coding_gene	FBgn0003023	otu	ovarian tumor	CG12743	mRNA	FBtr0333146	otu-RD		0	2.42	0	0	0	0	0	0	0	0	0	2.9	0	0	0	0	0	0	0	0	0	0	0.02	0	0	0	0	1.48	0	0	0	1.22	0	0	0	0	0	0	0
1464	FBtr0333147	protein_coding_gene	FBgn0003023	otu	ovarian tumor	CG12743	mRNA	FBtr0333147	otu-RE		0	0	0	0	0	0	0	0	0	0	0	0	0	0	0	0	0	0	0	0	0	0	0	0	0	0	0	0	0	0	0	0	0	0	0	0	0	0	0
1465	FBtr0070738	protein_coding_gene	FBgn0003028	ovo	ovo	CG6824	mRNA	FBtr0070738	ovo-RB		0	0	0	0	0	0	0	0	0	0	0	0	0	0	0	0	0	0	0	0	0	0	0	0	0	0	0	0	0	0	0	0	0	0	0	0	0	0	0
1466	FBtr0070739	protein_coding_gene	FBgn0003028	ovo	ovo	CG6824	mRNA	FBtr0070739	ovo-RC		3.24	5.54	1.87	0.03	2.89	75.73	0	1.31	0.39	2.02	0	10.59	32.97	3	0.51	0.54	0.17	0.72	0.99	1.34	13.3	20.3	3.49	14.78	69.62	5.86	20.68	0.48	5.26	1.5	0.13	0	23.73	23.87	14.2	1.71	0.15	0	0.48
1467	FBtr0070740	protein_coding_gene	FBgn0003028	ovo	ovo	CG6824	mRNA	FBtr0070740	ovo-RA		0	0	0	0	0	0	0.03	0	0	0	0	0	0	0	0	0	0	0	0	0	0	0	0	0	0	0.89	0	0	0	0	0	0	0	0	0	0	0	0	0
1468	FBtr0100408	protein_coding_gene	FBgn0003028	ovo	ovo	CG6824	mRNA	FBtr0100408	ovo-RD		0	0	0	0	0	0	0	0.21	0	0	0	0	0	0	0	0	0	0	0	0	0	0	0	0	0	0	0	0	0	0	0	0	0	0	0	0	0	0	0
1469	FBtr0301914	protein_coding_gene	FBgn0003028	ovo	ovo	CG6824	mRNA	FBtr0301914	ovo-RE		0	0	0	0	0	0	0	0	0	0	0.51	0	0	0	0	0	0	0	0	0	0	0	0	1.15	0	0	0	0	0	0	0	0.94	0	0	0	0	0	0	0
1470	FBtr0075836	protein_coding_gene	FBgn0003034	SP	Sex Peptide	CG17673	mRNA	FBtr0075836	SP-RA		0	0	0	0	0	0	0	0	0	0	0	0	0	0	0	0	0	0	0	0	0	0	0	0	0	0	0	0	0	0	0	0	0	0	0	0	0	0	0
1471	FBtr0076771	protein_coding_gene	FBgn0003041	pbl	pebble	CG8114	mRNA	FBtr0076771	pbl-RA		0.22	0	0.16	0	0	0	0	0	0	0	2.33	0	0	0	0.14	0.59	0	0	0	0	0	0	0	2.72	0	0	0	0	0	0	0	2.24	0	0	0	0	0.16	0	0
1472	FBtr0076772	protein_coding_gene	FBgn0003041	pbl	pebble	CG8114	mRNA	FBtr0076772	pbl-RB		0.14	0.25	0	0	0	0	0	0	0	0	0	0	0	0	0	0	0	0	0	0	0.3	0	0	0	0	0	0.7	0	0	0	0	0	0	0	0	0	0	0	0
1473	FBtr0076773	protein_coding_gene	FBgn0003041	pbl	pebble	CG8114	mRNA	FBtr0076773	pbl-RC		0	0	0	0	0	0	0	0	0	0	0.84	0	0	0	0	0	0	0	0	0	0	0	0	0	0	0	0	0	0	0	0	0.12	0	0	0	0	0	0	0
1474	FBtr0076774	protein_coding_gene	FBgn0003041	pbl	pebble	CG8114	mRNA	FBtr0076774	pbl-RD		0	6.41	0	0	0	0	0	0	0	0.05	0	0	0	0	0	0	0	0	0.13	0	2.64	0	0.21	0	0	0	0.29	0	0	0	0	0	0.02	0	0	0	0	0	0
1475	FBtr0112817	protein_coding_gene	FBgn0003041	pbl	pebble	CG8114	mRNA	FBtr0112817	pbl-RE		0	0	0	0	0	0	0	0	0	0	0	0	0	0	0	0	0	0	0	0	0	0	0	0	0	0	0	0	0	0	0	0	0	0	0	0	0	0	0
1476	FBtr0306647	protein_coding_gene	FBgn0003041	pbl	pebble	CG8114	mRNA	FBtr0306647	pbl-RF		0.04	0	0	0	0	0	0	0	0	0	2.54	0	0	0	0	0	0	0	0	0	0.13	0	1.81	0	0	0	0.66	0	0	0	0	0	0	0	1.83	0	0	0	0
1477	FBtr0078405	protein_coding_gene	FBgn0003042	Pc	Polycomb	CG32443	mRNA	FBtr0078405	Pc-RA		47.03	55.36	73.21	36.9	62.81	6.89	33.75	62.98	2.39	36.43	21.09	60.58	169.95	184.57	33.57	41.02	94.75	21.06	36.33	44.6	66.64	34.98	55.67	116.99	11.89	165.69	18.07	15.57	18.43	36.94	29.31	36.73	49.06	6.46	33.73	113.09	1.33	0	1.55
1478	FBtr0086735	protein_coding_gene	FBgn0003044	Pcl	Polycomblike	CG5109	mRNA	FBtr0086735	Pcl-RA		11.15	29.11	21.61	26.63	0	1.7	0	19.42	0	37.56	2.38	0	0	28.63	62.73	0	0.11	5.44	20.85	0	0	0	6.27	19.51	0	0	0.79	34	24.22	7.06	4.57	8.54	11.32	2.83	11.05	5.48	0	1.63	0
1479	FBtr0329998	protein_coding_gene	FBgn0003044	Pcl	Polycomblike	CG5109	mRNA	FBtr0329998	Pcl-RB		19.52	15.53	17.82	7.86	0.66	0	26.59	19.69	14.92	8.73	5.4	4.74	30.77	3	1.82	13.22	0.24	1.2	0.88	1.06	13.84	12.12	11.44	62.39	90.78	2.87	8.98	6.01	4.25	0	0.89	2.14	11.29	0	30.02	1.2	2.31	0.57	3.21
1480	FBtr0079388	protein_coding_gene	FBgn0003046	Pcp	Pupal cuticle protein	CG3440	mRNA	FBtr0079388	Pcp-RA		0	0	0	0	0	0	0	0	0	0	0.45	0	0	0	0	0	0	0	0	0	0	0	0	0	0	0	0	0	0	0	0	0	0	0	0	0	0	0	0
1481	FBtr0332381	protein_coding_gene	FBgn0003048	pcx	pecanex	CG3443	mRNA	FBtr0332381	pcx-RC		0	0	3.67	1.07	0	11	7.37	0	1.13	5.38	2.99	0	4.71	2.46	0	37.16	0	7.61	0	0	19.13	22.35	11.79	8.1	39.21	0	5.67	0	0	0	0	4.54	0.87	0	5.21	0	0	0	0.06
1482	FBtr0342766	protein_coding_gene	FBgn0003048	pcx	pecanex	CG3443	mRNA	FBtr0342766	pcx-RE		0	0.36	0	0.01	0	0.02	0.01	0	0	0.03	0	0	0	0	0	0.03	0	0.01	0	0	0.01	0.02	0.02	0.01	0.03	0	0.04	0	0	1.49	0	0.01	0	0	0.01	0	0	0	0
1483	FBtr0344153	protein_coding_gene	FBgn0003048	pcx	pecanex	CG3443	mRNA	FBtr0344153	pcx-RF		19.24	19.78	20.57	15.15	15.95	0	8.99	30.3	20.11	18.9	0	16.61	0	3.12	18.42	0	3.86	0	17.32	18.09	0	5.78	0	0	0	4.93	0	13.74	19.75	16.29	9.45	0.61	6.32	7.54	5.71	29.84	2.4	0.46	0
1484	FBtr0070680	protein_coding_gene	FBgn0003053	peb	pebbled	CG12212	mRNA	FBtr0070680	peb-RA		0	0.58	0.29	0	0	0	0	0	0	0	0	0.02	0	0	0	0.02	0	0	0	0	0	0	0	0	0	0	0	0	0	0	0	0.01	0	0	0.8	0	0	0.05	0
1485	FBtr0100265	protein_coding_gene	FBgn0003053	peb	pebbled	CG12212	mRNA	FBtr0100265	peb-RB		0.12	0.09	0	0	0	0	0	0	0	0	0.1	0	0	0	0	0	0	0	0	0	0	0	0	0.07	0	0.05	16.73	0	0	0	0	0	0	0	2.33	0	0	0	0
1486	FBtr0074400	protein_coding_gene	FBgn0003057	CG10598		CG10598	mRNA	FBtr0074400	CG10598-RA		0	0	0	0	0	0	0	0	0	0	0	0	0	0	0	0	0	0	0	0	0	0	0	0	0	0	0	0	0	0	0	0	0	0	0	0	0	0	0
1487	FBtr0346194	protein_coding_gene	FBgn0003057	CG10598		CG10598	mRNA	FBtr0346194	CG10598-RC		0	0	0	0	0	0	0	0	0	0	0	0	0	0	0	0	0	0	0	0	0	0	0.14	0	0	0	0	0	0	0	0	0	0	0	0	0	0	0	0
1488	FBtr0082860	protein_coding_gene	FBgn0003060	CG9757		CG9757	mRNA	FBtr0082860	CG9757-RA		0	0	0	0	0	0	0	0	0	0	0	0	0	0	0	0	0	0	0	0	0	0	0	0	0	0	0	0	0	0	0	0	0	0	0	0	0	0	0
1489	FBtr0334496	protein_coding_gene	FBgn0003060	CG9757		CG9757	mRNA	FBtr0334496	CG9757-RB		0.55	0	0	0	0	0	0	0	0	0	0	0	0	0	0	0	0	0	0	0	0	0	0	0	0	0	0	0	0	0	0	0	0	0	0	0	0	0	0
1490	FBtr0071982	protein_coding_gene	FBgn0003062	Fib	Fibrillarin	CG9888	mRNA	FBtr0071982	Fib-RA		5.95	5.86	2.1	0	0	0	0	7.42	0	0.39	2.38	0	0	0	2.88	0	8.81	3.08	0.21	0.77	6.86	0.49	0.07	0	0	0	1.41	0.61	0	3.64	10.64	23	164.37	0	4.11	0	2.73	0	0.53
1491	FBtr0085859	protein_coding_gene	FBgn0003065	CG2150		CG2150	mRNA	FBtr0085859	CG2150-RA		0	0.2	7.11	0	0	0	0	0	0	0	2.32	0	0	0	0	0	0	0	0.24	0	0	0	0	0	0	0	0	0	0	0	0	48.55	0	154.84	0	0	0	0	0.92
1492	FBtr0086701	protein_coding_gene	FBgn0003067	Pepck1	Phosphoenolpyruvate carboxykinase 1	CG17725	mRNA	FBtr0086701	Pepck1-RA		0.29	0	0.21	1.01	0	0	0	0	0.04	0	0.1	0	0	0	0	0	0	0	0.1	0.47	0	0	0.92	0.03	0	0	87.22	0	0	0	0	0.82	0	0.66	0	0	0	0	0
1493	FBtr0070477	protein_coding_gene	FBgn0003068	per	period	CG2647	mRNA	FBtr0070477	per-RA		0.87	0	0.58	2.89	0	0	0	13.35	7.79	30.83	3.44	0	0	0	1.8	0	0	0	5.06	0	0	0	0.21	0	0	0	2.15	0	0	0	0	0.45	1.7	2.51	6.12	0	0.88	0.33	1.78
1494	FBtr0332311	protein_coding_gene	FBgn0003068	per	period	CG2647	mRNA	FBtr0332311	per-RB		0.17	0.59	0	0	0	0	0	1.3	3.05	4.41	0.11	0.65	0	0	0	0.29	0.51	5.77	0	0	1.11	0.06	0.63	4.14	0	0.27	0	1.18	0	8.09	0.14	0	4.7	0	2.44	0.31	0.83	0.24	0
1495	FBtr0088420	protein_coding_gene	FBgn0003071	Pfk	Phosphofructokinase	CG4001	mRNA	FBtr0088420	Pfk-RA		0.44	0	0	0	0	0	1.16	0	0	0	0	0	0	0	0	0	0	0	0	0	0	0	0	0	0	0	0	0.78	0	0	0	0	0	0	0	0	0	0	0
1496	FBtr0088421	protein_coding_gene	FBgn0003071	Pfk	Phosphofructokinase	CG4001	mRNA	FBtr0088421	Pfk-RC		0	0.16	0	0	0	0	0	3.36	2.17	0	0.21	0	0	0	0	12.72	0	0.04	0	0	0.58	0	0	0	0	0	0	1.59	0	0	0	0	0	0	0	0	0	0	0
1497	FBtr0088422	protein_coding_gene	FBgn0003071	Pfk	Phosphofructokinase	CG4001	mRNA	FBtr0088422	Pfk-RB		9.41	7.14	6.29	6.73	0.27	0.96	1.32	5.92	1.77	10.7	17.63	17.45	7	4.23	10.2	11.67	4.4	10.45	0.72	13.86	12.97	8.69	25.04	3.69	0.08	5.7	8.48	15.87	5.31	6.11	15.29	3.73	28.84	22.23	8.86	0	39.37	63.93	74.02
1498	FBtr0304925	protein_coding_gene	FBgn0003071	Pfk	Phosphofructokinase	CG4001	mRNA	FBtr0304925	Pfk-RD		0	0	0	0	0	0	0	0	1.04	0	0	0	0	0	0	0	0	0	0	0	0	0	0	0	0	0	0	0	0	0	0	0	0	0	0	0	0	0	0
1499	FBtr0333067	protein_coding_gene	FBgn0003071	Pfk	Phosphofructokinase	CG4001	mRNA	FBtr0333067	Pfk-RE		0	1.26	0.46	0.32	0	0.39	10.75	1.12	0	1.04	0	0.12	2.51	0	0	0	0	0.04	0	1.57	0.34	0.41	0.05	2.27	0	0	0	0	0	0	0	0	7.75	6.13	0.39	0.07	0	0.41	0
1500	FBtr0088679	protein_coding_gene	FBgn0003074	Pgi	Phosphoglucose isomerase	CG8251	mRNA	FBtr0088679	Pgi-RA		0	9.41	2.55	0	0	0	0	14.01	0.52	0.62	16.68	0	0	0	0	0	0	0	0	0	23.1	0	0	0	0	0	0	5.12	0	0	1.06	37.69	33.79	0	0	0	8.83	0	0
1501	FBtr0088680	protein_coding_gene	FBgn0003074	Pgi	Phosphoglucose isomerase	CG8251	mRNA	FBtr0088680	Pgi-RB		0	0	0	0	0	0	0	0	0	0	0	0	2.39	0	2.8	0	0	0.08	0	0	0	0	0	0	0	0	0.02	0	0	0	0	0	0	0	0	0	0	0	0
1502	FBtr0088681	protein_coding_gene	FBgn0003074	Pgi	Phosphoglucose isomerase	CG8251	mRNA	FBtr0088681	Pgi-RC		43.72	30.58	17.98	32.9	66.72	43.93	8.78	22.06	42.76	16.72	11.68	2.32	0	0	104.47	78.53	33.55	14.65	37.06	0	3.38	44.31	33.23	15.67	0.53	3.03	7.88	46.09	24.77	29.83	36.6	46.37	0	0	14.41	0.41	64.12	57.56	113.82
1503	FBtr0075492	protein_coding_gene	FBgn0003076	Pgm1	Phosphoglucose mutase 1	CG5165	mRNA	FBtr0075492	Pgm1-RA		3.98	6.49	4.41	0	0	1.87	0.06	7.12	2.36	6.48	5.54	0.45	0	0	13.76	0	0.91	0	0	0	1.85	0.57	0.22	19.11	0	0	2.04	0.21	0	3.13	0.12	1.75	3.2	0	0.77	22.68	36.67	27.04	19.99
1504	FBtr0070401	protein_coding_gene	FBgn0003079	Raf	Raf oncogene	CG2845	mRNA	FBtr0070401	Raf-RA		41.01	62.35	46.75	18.35	25.45	74.67	40.39	46.04	27.94	21.81	10.09	2.78	13.85	1.76	18.06	69.9	2.8	4.85	7.51	3.53	10.09	6.49	10.17	10.96	2.79	4.41	15.66	22.98	43.54	25.36	11.82	4.21	7.83	7.07	15.72	0	8.14	5.56	4.15
1505	FBtr0344007	protein_coding_gene	FBgn0003079	Raf	Raf oncogene	CG2845	mRNA	FBtr0344007	Raf-RE		0.1	0	0	0	0	0	0	0	0.67	0	1.37	0	0	0	0	0	0	0	0	0	0	0	1.55	0	0	0	1.65	1.06	0	0	0	1.09	19.46	0	3.47	0	0	0.6	0.28
1506	FBtr0088838	protein_coding_gene	FBgn0003082	phr	photorepair	CG11205	mRNA	FBtr0088838	phr-RA		0	0	0	0	0	0	0	0	0	0	5.85	0	0	0	0	0	0	0	0	0	3.11	0	5.26	0	1.87	0	0	0	0	0	0	11.52	0	0	1.59	0	0	0	0
1507	FBtr0088839	protein_coding_gene	FBgn0003082	phr	photorepair	CG11205	mRNA	FBtr0088839	phr-RB		0.67	0.57	0	0	0	0	0	0	1.38	0.17	0.75	0.16	0	0	0	0	3.65	0.83	0	0	1.53	0	0	0	0	0	0	0	0	0	1.73	0	0	0	0	0	5.45	6.82	12.64
1508	FBtr0070537	protein_coding_gene	FBgn0003086	Pig1	Pre-intermoult gene 1	CG10790	mRNA	FBtr0070537	Pig1-RB		20.04	15.57	22.53	47.85	26.78	62.66	68.78	22.97	11.65	11.5	5.23	0	0	0	0	0	0	0	0	0	0	0	0	0	0	0	0.93	0.44	0	0	0	0	0.8	0	19.72	4.02	0	0	0
1509	FBtr0080001	protein_coding_gene	FBgn0003087	pim	pimples	CG5052	mRNA	FBtr0080001	pim-RA		0	0	0	0	0	0	0	0	0	0	0	0	0	0	0	0	0	0	0	0	0	0	0	0	0	0	0	0	0	0	0	0	0	0	0	0	0	0	0
1510	FBtr0332190	protein_coding_gene	FBgn0003087	pim	pimples	CG5052	mRNA	FBtr0332190	pim-RB		0	0	0	0	0	0	0	0	0	0	0	0	0	0	0	0	0	0	0	0	0	0	0	0	0	0	0	4	0	0	0	0	0	0	0	0	0	0	0
1511	FBtr0075003	protein_coding_gene	FBgn0003089	pip	pipe	CG9614	mRNA	FBtr0075003	pip-RA		0.56	1.11	1.13	0.12	0	53.3	1.39	0	0	0.87	0.09	0	0	0	0	0	0	0	0	0	21.71	0	0.29	0	0.1	5.06	0.38	0.15	0	0.27	1.49	0	0.88	0	1.16	0	0.18	0	0
1512	FBtr0075004	protein_coding_gene	FBgn0003089	pip	pipe	CG9614	mRNA	FBtr0075004	pip-RC		0	0	0	0	0	0	0	0	0	0	0	0	0	0	0	0	0	0	0	0	0	0	0	0	0	0	0	0	0	0	0	0	0	0	0	0	0	0	0
1513	FBtr0075005	protein_coding_gene	FBgn0003089	pip	pipe	CG9614	mRNA	FBtr0075005	pip-RD		0	0	0	0	0	0	0	0	0	0	0	0	0	0	0	0	0	0	0	0	0	0	0	0	0	0	0	0	0	0	0	0	0	0	0	0	0	0	0
1514	FBtr0075007	protein_coding_gene	FBgn0003089	pip	pipe	CG9614	mRNA	FBtr0075007	pip-RF		0	0.16	0	0	0	0	0	0	0	0	0	0	0	0	0	0	0	0	0	0	0	0	0	0	0	0	0	0.18	0	0	0	0	0	0	0	0	0	0	0
1515	FBtr0075008	protein_coding_gene	FBgn0003089	pip	pipe	CG9614	mRNA	FBtr0075008	pip-RG		1.27	0	0.3	0	0	0	0	0	0	0	0	0	0	0	0	0	0	0	0	0	4.01	0	0.26	0	0.11	0	0	0	0	0	0	0	0	0	10.54	4.46	0	0	0
1516	FBtr0075009	protein_coding_gene	FBgn0003089	pip	pipe	CG9614	mRNA	FBtr0075009	pip-RH		0.78	0	0	0	0	0	0	0	0.07	0	0	0	0	0	0	0	0	0	0	0	0	0	0	0	0	0	0	0	0	0	0	0	0	0	0.28	0	0	0	0
1517	FBtr0075010	protein_coding_gene	FBgn0003089	pip	pipe	CG9614	mRNA	FBtr0075010	pip-RI		0	0	0	0	0	0	0.09	0.11	0	0	0	0	0	0	0.1	0	0	0	0	0	0	0	0	0	0.43	0	0	0	0	0	0	0.11	0	0.44	0	0	0	0	0
1518	FBtr0075011	protein_coding_gene	FBgn0003089	pip	pipe	CG9614	mRNA	FBtr0075011	pip-RJ		0.73	0.99	0	0.07	0	0	0.94	1.11	0	0	0.06	0	0	0	0	0	0	0	0	0	0.49	0	0	0	0	0	0	0	0	0	0.22	0.75	0.09	0	0	0	0	0	0
1519	FBtr0075012	protein_coding_gene	FBgn0003089	pip	pipe	CG9614	mRNA	FBtr0075012	pip-RK		0.22	0	0	0	0	0	0	0	0	0	0	0	0	0	0	0	0	0	0	0	0.75	0	0	1.59	0	0	0	0	0	0	0	0	0.7	0	0	0	0	0	0
1520	FBtr0075013	protein_coding_gene	FBgn0003089	pip	pipe	CG9614	mRNA	FBtr0075013	pip-RL		0	0	0	0	0	0	0	0	0	0	0	0	0	0	0	0	0	0	0	0	0	0	0	0	0	0	0	0	0	0	0	0	0	0	0	0	0	0	0
1521	FBtr0333897	protein_coding_gene	FBgn0003089	pip	pipe	CG9614	mRNA	FBtr0333897	pip-RN		0.23	0	0	5.24	0	0	0	0	0	0	0	0	0	0	0	0	0	0	0	0	0.18	0	0	2.62	32.87	0	0	0	0	0	0	0	0.06	0	0	0	0	0	0
1522	FBtr0089042	protein_coding_gene	FBgn0003090	pk	prickle	CG11084	mRNA	FBtr0089042	pk-RA		0	0	0	0	0	0	0	0	0	0	0.06	0	0	0	0	0	0	0	0	0	0	0	0	0	0	0	0	0	0	0	0	0	0	0	0	0	0	0	0
1523	FBtr0089043	protein_coding_gene	FBgn0003090	pk	prickle	CG11084	mRNA	FBtr0089043	pk-RB		1.67	0.33	0	0	0	0	0	0	0	0	0.41	0	0	0	0	0	0	0	0	0	0	0	0	0.03	0	0	0.24	0.43	0	0	0	0.17	0.06	0	0	0	0	0	0
1524	FBtr0089044	protein_coding_gene	FBgn0003090	pk	prickle	CG11084	mRNA	FBtr0089044	pk-RC		0	0	0	0	0	0	0	0	0	0	0	0	0	0	0	0	0	0.02	0	0	0	0	0.05	0	0	0.37	0.08	0.11	0	0	0	0	0	0.28	0	0	0	0	0
1525	FBtr0087048	protein_coding_gene	FBgn0003091	Pkc53E	Protein C kinase 53E	CG6622	mRNA	FBtr0087048	Pkc53E-RB		117.77	118.72	98.94	51.95	3.21	63.99	54.17	81.98	28.73	35.14	0.12	30.78	45.42	371.64	27.27	20.53	0	0	0	0.3	0.67	3.28	6.94	68.68	11.45	14.91	0	0	0	1.66	2.19	6.99	1.98	15.27	1.79	1.26	0	0	0
1526	FBtr0087049	protein_coding_gene	FBgn0003091	Pkc53E	Protein C kinase 53E	CG6622	mRNA	FBtr0087049	Pkc53E-RA		93.32	147.91	137.26	34.32	63.67	24.72	25.85	87.69	181.07	89.09	5.55	0.31	85.35	14.17	59.98	68.97	0	0.07	0	1.78	5.93	5.07	19.27	127.65	59.26	22.31	12.84	0	1.73	6.6	26.45	19.66	14.47	9.17	20.51	64.36	0	0.31	0
1527	FBtr0112819	protein_coding_gene	FBgn0003091	Pkc53E	Protein C kinase 53E	CG6622	mRNA	FBtr0112819	Pkc53E-RC		0	0.03	0	0	0	0	4.61	0	0.55	0	1.74	0	3.83	0	0	0	0	0.11	0	0	0	0	0	0.22	0	0	1.14	0	0	0	0	0	0.51	0	0.8	0	0	0	0.23
1528	FBtr0305069	protein_coding_gene	FBgn0003091	Pkc53E	Protein C kinase 53E	CG6622	mRNA	FBtr0305069	Pkc53E-RD		16.78	18.21	13.72	0.35	38.67	18.47	0	28.3	6.58	9.44	0	1.46	0	5.23	25.79	1.4	25.98	0	0	0	0.23	1.2	2.62	4.73	0.66	0.81	0.08	0	0	0.19	0	0	0.19	197.96	5	10.93	0	0	0
1529	FBtr0305070	protein_coding_gene	FBgn0003091	Pkc53E	Protein C kinase 53E	CG6622	mRNA	FBtr0305070	Pkc53E-RE		5.49	5.47	8.16	17.23	0.79	0.13	0	3.4	0	2.13	0.1	0	0	0	2.58	2.6	0	0	0	0	0	0.11	0	0.69	0	3.74	0	0	0	0	0	0.09	0.07	0	0	0	0	0	0
1530	FBtr0331960	protein_coding_gene	FBgn0003091	Pkc53E	Protein C kinase 53E	CG6622	mRNA	FBtr0331960	Pkc53E-RF		296.56	382.5	365.96	211.27	71.58	279.93	128.44	275.26	152.06	210.67	17.88	53.35	342.82	282.28	79.72	70.16	1.01	7.19	18.43	3.89	8.57	65.94	83.68	249.63	487.68	174.18	26.8	12.68	8.04	7.06	19.89	14.47	114.11	146.75	119.79	64.54	0.84	0.14	0
1531	FBtr0085359	protein_coding_gene	FBgn0003093	Pkc98E	Protein C kinase 98E	CG1954	mRNA	FBtr0085359	Pkc98E-RA		176.17	202.2	225.66	281.23	210.58	170.75	283.68	176.5	62.84	154.75	60.24	439.93	365.51	191.96	75.25	116.17	118.09	140.05	187.71	203.37	286.15	309.15	299.53	495.27	602.05	190.37	112.82	44.28	48.28	74.47	49.02	77.58	123.15	99.87	109.63	199.3	31.61	17.14	52.67
1532	FBtr0301516	protein_coding_gene	FBgn0003093	Pkc98E	Protein C kinase 98E	CG1954	mRNA	FBtr0301516	Pkc98E-RB		0	0	0	0	0	128.06	0	0	30.04	0	0	0	0	283.13	0	0	0	0	0	0	0	0	0	0	0	0	0	39.88	0	0	0	0	0	0	0	0	26.32	31.49	8.01
1533	FBtr0339149	protein_coding_gene	FBgn0003093	Pkc98E	Protein C kinase 98E	CG1954	mRNA	FBtr0339149	Pkc98E-RC		1.3	0.74	1.01	0	0	0	0	0	0	3.55	0.08	0	0	0	0	2.48	0	0	0	0	0	0.55	0	0	0	0	0	0	0	0	50.65	0	0	0	0	0	0	0	8.24
1534	FBtr0339150	protein_coding_gene	FBgn0003093	Pkc98E	Protein C kinase 98E	CG1954	mRNA	FBtr0339150	Pkc98E-RD		0	0.82	2.58	0.87	0	0	37.27	0	0	1.3	0.29	0	0	0	9.33	0	0	0	0	0.13	1.32	0.18	1.21	1.59	0.29	0	1.16	0	0	0	0	0	0.76	0	1.16	95.47	0	22.71	0
1535	FBtr0086306	protein_coding_gene	FBgn0003114	plu	plutonium	CG9183	mRNA	FBtr0086306	plu-RA		0	0.22	0	0	0	0	0	0	0	0	0	0	0	0	0	0	0	0	0	0	0	0	0	0	0	0	0	0	0	0	0	0	0	0	0	0	0	0	0
1536	FBtr0070389	protein_coding_gene	FBgn0003116	pn	prune	CG3461	mRNA	FBtr0070389	pn-RA		2.16	2.33	0.97	0	0	4.43	0.91	0.36	7.94	0.15	2.3	0	0	0.14	0.59	0.08	1.82	0	2.02	11.55	0	1.93	1.08	0	0	0	1.79	1.19	0	0.78	0	0	1.2	0	31.72	0	4.6	0	3.21
1537	FBtr0083220	protein_coding_gene	FBgn0003117	pnr	pannier	CG3978	mRNA	FBtr0083220	pnr-RB		0	0	0	0	0	0	0	0	0	0	0	0	0	0	0	0	0	0	0	0	0	0	0	0	0	0	0	0	0	0	0	0	0	0	0	0	0	0	0
1538	FBtr0083221	protein_coding_gene	FBgn0003117	pnr	pannier	CG3978	mRNA	FBtr0083221	pnr-RA		0	0.04	0	0	0	0	0	0	0	0	0	0	0	0	0	0	0	0	0	11.89	0	0	0	0	0	0	0	0	0.05	0	0	0	0	0	0	0	0	0	0
1539	FBtr0335426	protein_coding_gene	FBgn0003117	pnr	pannier	CG3978	mRNA	FBtr0335426	pnr-RC		0	0	0	0	0	0	0	0	0	0	0	0	0	0	0	0	0	0	0	0	0.11	0	0	0	0	0	0	0	0	0	0	0	0	0	0	0	0	0	0
1540	FBtr0335427	protein_coding_gene	FBgn0003117	pnr	pannier	CG3978	mRNA	FBtr0335427	pnr-RD		0	0	0	0	0	0	0	0	0	0	0	0	0	0	0	0	0	0	0	0	0	0	0	0	0	0	0	0	0	0	0	0	0	0	0	0	0	0	0
1541	FBtr0089715	protein_coding_gene	FBgn0003118	pnt	pointed	CG17077	mRNA	FBtr0089715	pnt-RC		0	0	0	0	0	0	0	0	0	0	3.78	0	0	0	0	0	0	0	0	0	0	0	2.95	0.65	0	0	0	0	0	0	0	9.37	0	0	0	2.15	0	0	0
1542	FBtr0089716	protein_coding_gene	FBgn0003118	pnt	pointed	CG17077	mRNA	FBtr0089716	pnt-RD		0.11	0	0	0	0	0	0	0	0	0	8.23	0	0	0	0	0	9.97	0	0	6.92	0.05	0	3.82	0	0.05	0	0	0	0	0	0	8.05	0	14.45	0	0	0	0	0
1543	FBtr0089717	protein_coding_gene	FBgn0003118	pnt	pointed	CG17077	mRNA	FBtr0089717	pnt-RB		0	0	0.23	0	0	2.67	0	0	0	0	14.26	0	0	0	0	0	0	1.19	0	0	0	0	18.47	0	0	0	22.43	0	0	0	0	7.64	0	0	0	0	0	0	0
1544	FBtr0334554	protein_coding_gene	FBgn0003118	pnt	pointed	CG17077	mRNA	FBtr0334554	pnt-RE		0	0	0	0	0	0	0	0	0	0	0	0	2.93	0	0	0	0	0	0	0	0	0	0	0	0	0	8.49	0	0	0	0	0	1.81	0	0	0	0	0	0
1545	FBtr0074839	protein_coding_gene	FBgn0003124	polo	polo	CG12306	mRNA	FBtr0074839	polo-RA		0.14	0	0.04	0	0	0	0	4.68	0	0	0	0	0	0	0	0	0	0	0	0	0.78	0	0	0	0	0	0.64	0	0	0	0	1.27	0	0	0	0	0.1	0	0
1546	FBtr0100318	protein_coding_gene	FBgn0003124	polo	polo	CG12306	mRNA	FBtr0100318	polo-RB		0	0.42	0	0	0	0	1.39	0	0.18	0	0.06	0	0	0	0.06	0	0	0	1.16	0	0	0	0.03	0	0	0	0	1.2	0	0	0	0	0	0.17	0	0	0	0	0
1547	FBtr0111026	protein_coding_gene	FBgn0003129	Poxm	Pox meso	CG9610	mRNA	FBtr0111026	Poxm-RC		0	0.46	0	0	0	0	0	0	0.12	0.71	0.03	0	0	0	0	0	0.75	0	0.05	0	0.17	0.18	0	0.79	0	0	0.34	0	0	0	0	0	0	0	0	0.79	0	0	0
1548	FBtr0087311	protein_coding_gene	FBgn0003130	Poxn	Pox neuro	CG8246	mRNA	FBtr0087311	Poxn-RA		0	0	0	0	0	0	0	0	0	0	0.25	0	0	0	0	0	0	0	0	0	0	0	0.09	0.14	0	0	0	0	0	0	0	0	0	0	0	0	0	0	0
1549	FBtr0329908	protein_coding_gene	FBgn0003130	Poxn	Pox neuro	CG8246	mRNA	FBtr0329908	Poxn-RB		0	0	0	0	0	0	0	0	0	0	0	0	0	0	0	0	0	0.6	0	0	3.48	0	0	0	0	0	0	0	0	0	0	0	0	0	0.05	0	0	0	0
1550	FBtr0074017	protein_coding_gene	FBgn0003132	Pp1-13C	Protein phosphatase 1 at 13C	CG9156	mRNA	FBtr0074017	Pp1-13C-RA		0	0	0	0	0	0	0	0	0	0	0.9	0	0	0	0	0	0.22	0	0.07	0	0.42	0	0.25	3.42	0	0.11	0	0	0	0	0	0	0	0	0	0.13	0	0	0
1551	FBtr0084642	protein_coding_gene	FBgn0003134	Pp1α-96A	Protein phosphatase 1α at 96A	CG6593	mRNA	FBtr0084642	Pp1α-96A-RA		0	12.84	18.49	0	0	18.9	0	0	40.03	0	14.02	0	50.46	424.57	19.39	1.18	0	1.93	0	0	0	0	0	23.18	0	0	0	0	0	0	0	18.95	0	135.47	10.56	0	19.61	36.59	54.11
1552	FBtr0334334	protein_coding_gene	FBgn0003134	Pp1α-96A	Protein phosphatase 1α at 96A	CG6593	mRNA	FBtr0334334	Pp1α-96A-RB		93.18	93.01	85.42	77.66	128.73	47.52	143.63	111.16	52.39	113.77	54.63	484.45	244.07	199.89	77.05	86.46	103.2	78.54	250.03	213.84	265.44	375.54	243.9	233.55	285.1	179.66	99.69	55.14	52.19	65.09	66.24	105.9	124.88	206.45	115.75	108.63	44.42	15.06	26.73
1553	FBtr0300337	protein_coding_gene	FBgn0003137	Ppn	Papilin	CG33103	mRNA	FBtr0300337	Ppn-RC		1.14	0.56	0.6	0.79	0	0.77	0	1.74	0.21	0	0.59	0.16	0	0.23	0.91	2.35	19.45	1.01	0.25	91.14	0.52	0.44	0.49	0	0.45	4.82	0.44	0.84	2.29	0.93	0.18	1.44	1.6	0	0.24	0.03	0	0	0
1554	FBtr0301837	protein_coding_gene	FBgn0003137	Ppn	Papilin	CG33103	mRNA	FBtr0301837	Ppn-RE		0	0	0	0	0	0	0	0	0	0	0	0	0	0	0	0	0	0	0	0	0	0	0	0	0	0	0	0	0	0	0	0	0	0	0	0	0	0	0
1555	FBtr0301838	protein_coding_gene	FBgn0003137	Ppn	Papilin	CG33103	mRNA	FBtr0301838	Ppn-RF		0	0	0	0	0	0	0	0	0	1.16	0.38	0	0	0	0	0	0	0	0	3.7	0	0	0	5.31	0	0	0	0	0	0	0	2.46	0	0	0	0	0	0	0
1556	FBtr0301839	protein_coding_gene	FBgn0003137	Ppn	Papilin	CG33103	mRNA	FBtr0301839	Ppn-RG		0	0	0	0	0	0	0	0	0	0	0	0	0	0	0	0	6.4	0	0	0	0	0	0	0	0	0	0	0	0	0	0	0	0	0	0	0	0	0	0
1557	FBtr0070921	protein_coding_gene	FBgn0003139	PpV	Protein phosphatase V	CG12217	mRNA	FBtr0070921	PpV-RA		0	9.28	0	0	0	0	4.11	0	0	0	9.21	0	0	0	0	0	0	0	1.58	0	21.47	0	0	0	29.85	0	0	0	0	0	5.37	18.52	36.25	0	5.87	0	0	0	0
1558	FBtr0331430	protein_coding_gene	FBgn0003139	PpV	Protein phosphatase V	CG12217	mRNA	FBtr0331430	PpV-RB		0	25.17	0	0	0	0	0	0	0	0	2.43	0	0	0	0	0	0	0	0	0	0	0	0	0	0	0	0	0	0	0	0	2.34	0	0	0.01	0	0	0	0
1559	FBtr0331431	protein_coding_gene	FBgn0003139	PpV	Protein phosphatase V	CG12217	mRNA	FBtr0331431	PpV-RC		42.98	14.97	42.52	19.86	0.38	5.11	220.62	24.15	20.79	31.91	7.99	17.22	0.6	187.49	11.61	70.18	1.42	11.39	55.47	5.45	20.1	4.96	12.78	27	0	0	38.6	27.5	31.59	6.88	22.55	13.23	0	6.89	3.68	73.22	5.13	10.58	22.75
1560	FBtr0331432	protein_coding_gene	FBgn0003139	PpV	Protein phosphatase V	CG12217	mRNA	FBtr0331432	PpV-RD		0	0	4.8	0	0	0	0	0	4.1	0	0.01	0	0	0	0	0	0	0	0	0	0	0	0	0	0	0	0	0	0	0	2.86	3.6	0	0	0	0	0	0	0
1561	FBtr0086817	protein_coding_gene	FBgn0003140	PpY-55A	Protein phosphatase Y at 55A	CG10930	mRNA	FBtr0086817	PpY-55A-RA		0	0	0	0	0	0	0	0	0	0	0.64	0	0	0	0	0	0	0	0	0	0	0	0	0	0	0	0	0	0	0	0	0	0	0	0	0	0	0	0
1562	FBtr0344898	protein_coding_gene	FBgn0003140	PpY-55A	Protein phosphatase Y at 55A	CG10930	mRNA	FBtr0344898	PpY-55A-RB		0	0	0	0	0	0	94.52	0	0	0	0	0	0	0	0	0	0	0.44	0	0	0.45	0	0	0.99	0	0	0	0	0	0	0	0	0	0	0	0	0	0	0
1563	FBtr0089395	protein_coding_gene	FBgn0003141	pr	purple	CG16784	mRNA	FBtr0089395	pr-RC		13.51	28.98	18.11	0.4	0	4.85	0	8.74	0.1	3.72	39.71	8.77	20.55	0	11.2	6.85	14.34	6.28	0.39	3.74	13.87	2.74	26.72	42.35	5.44	15.79	12.3	23.59	1.01	8.39	18.24	30.3	18.25	111.83	35.75	0	16.67	29.23	18.42
1564	FBtr0080298	protein_coding_gene	FBgn0003145	prd	paired	CG6716	mRNA	FBtr0080298	prd-RB		0	0	0	0	0	0	0	0	0	0	0	0	0	0	0	0	0	0	0	0	0	0	0	0	0	0	0	0	0	0	0	0	0	0	0	0	0	0	0
1565	FBtr0080299	protein_coding_gene	FBgn0003145	prd	paired	CG6716	mRNA	FBtr0080299	prd-RA		0	0	0	0	0	0	0	0	0	0	0	0	0	0	0	0	0	0	0	0	0	0	0	0	0	0	0	0	0	0	0	0	0	0	0	0	0	0	0
1566	FBtr0076593	protein_coding_gene	FBgn0003149	Prm	Paramyosin	CG5939	mRNA	FBtr0076593	Prm-RA		0	0	0	0	0	0	0	0	0	0	0.19	0	0	0	0	0	0	0	0	0	0	0	0	0	0	0	7.97	0	0	0	0	0	0	0	0	0	0	0	0
1567	FBtr0076594	protein_coding_gene	FBgn0003149	Prm	Paramyosin	CG5939	mRNA	FBtr0076594	Prm-RB		0	0	0	0	0	0	0	0	0	0	0	0	0	0	0	0	0	0	0	0	0	0	0	0	0	0	0	0	0	0	0	0.03	0	0	0	0	0.09	0	0
1568	FBtr0076595	protein_coding_gene	FBgn0003149	Prm	Paramyosin	CG5939	mRNA	FBtr0076595	Prm-RC		0	0	0	0	0	0	0	0	0	0	0	0	0	0	0	0	0	0	0	0.26	0	0	0	0	0	0	0	0	0	0	0	0	0	0	0	0	0	0	0
1569	FBtr0076596	protein_coding_gene	FBgn0003149	Prm	Paramyosin	CG5939	mRNA	FBtr0076596	Prm-RD		0	0	0	0	0	0	0	0	0	0	0	0	0	0	0	0	0	0	0	0	0	0	0	0	0	0	0	0	0	0	0	0	0	0	0.04	0	0	0	0
1570	FBtr0306639	protein_coding_gene	FBgn0003149	Prm	Paramyosin	CG5939	mRNA	FBtr0306639	Prm-RE		0	0	0	0	0	0	0	0	0	0	0	0	0	0	0	0	0	0	0	0	0	0	0	0	0	0	0	0	0	0	0	0	0	0	0	0	0	0	0
1571	FBtr0070402	protein_coding_gene	FBgn0003159	CG2841		CG2841	mRNA	FBtr0070402	CG2841-RB		0	0	0	0	0	0	0	0	0	0	0	0	0	0	0	0	0	0	0	0	0	0	0	0	0	0	1.21	0	0	0	0	0	0	0	0	0	0	0	0
1572	FBtr0070403	protein_coding_gene	FBgn0003159	CG2841		CG2841	mRNA	FBtr0070403	CG2841-RC		1.01	0.25	0	0	0	0	1.99	0	0	0	0.24	0	0	0.24	0	0	0	0	0	0.39	4.05	0	1.87	0.57	25	0	1.98	60.9	16.84	0	0	0	0.16	0	0	0	0	0	0
1573	FBtr0070404	protein_coding_gene	FBgn0003159	CG2841		CG2841	mRNA	FBtr0070404	CG2841-RA		0.06	0	0	0	0	0	0	0	0	0	0	0	0	0	0	0	0	0	0	0	0	0	0	0	0	0	19.31	0	0	0	0	0	0.6	0	0	0	0	0	0
1574	FBtr0307284	protein_coding_gene	FBgn0003159	CG2841		CG2841	mRNA	FBtr0307284	CG2841-RD		0.27	0	0	0	0	0	0	0	0	0	4.64	0	0	0	0	0	0	0	0	0	0	0	0	34.11	0	0	37.92	0.75	0.27	0	0	6.94	0.41	0	1.3	0	0	0	0
1575	FBtr0307285	protein_coding_gene	FBgn0003159	CG2841		CG2841	mRNA	FBtr0307285	CG2841-RE		0	0	0	0	0	0	0	0.77	0	0	2.55	0	0	0.62	0	0.14	0	0	0.06	0	0	13.99	0	19.58	0	15.58	0	0	35.88	5.43	0	0	0	0	0	0	0	0	0
1576	FBtr0343597	protein_coding_gene	FBgn0003159	CG2841		CG2841	mRNA	FBtr0343597	CG2841-RF		0	0.88	0.02	0	0	8.37	0.46	0	0	1.65	0	0.23	0	0	0	0	0	0.45	0	0.43	0.16	0	0.15	2.47	1.17	129.01	0	18.33	0.23	0	0	0	0	0.2	0	0	0	0	0
1577	FBtr0071578	protein_coding_gene	FBgn0003162	Pu	Punch	CG9441	mRNA	FBtr0071578	Pu-RB		0	0.07	0	1.69	0	1.54	1.98	0	2.83	0	0.25	3.61	0	52.45	0.3	4.91	4.02	0	22.67	10.35	0	11.89	9.52	18.49	0	2.31	5.73	22.72	5.99	1.8	7.41	0	0	31.71	0	5.61	2.52	8.83	2.05
1578	FBtr0071579	protein_coding_gene	FBgn0003162	Pu	Punch	CG9441	mRNA	FBtr0071579	Pu-RC		0	0	0	0	0	0	0	0	4.02	0	3.02	0	0	0	14.89	0	0	13.99	0	2.16	50.34	26.42	3.88	54.92	0	0	0	3.97	0	4.24	0	2.42	53.01	0	34.25	0	0	0	0
1579	FBtr0071580	protein_coding_gene	FBgn0003162	Pu	Punch	CG9441	mRNA	FBtr0071580	Pu-RA		14.83	9.66	16.75	0	0	0	0	12.36	0	15.58	2.29	0	32.64	0	2.56	0	0	0.82	0	0	1.48	3.52	0	14.69	9.35	0	2.38	0	0	24.68	11.58	3.65	36.08	0	10.59	0	0	0	0
1580	FBtr0081990	protein_coding_gene	FBgn0003165	pum	pumilio	CG9755	mRNA	FBtr0081990	pum-RA		4.02	0.37	4.59	1.89	0.45	0.45	0.84	0.32	3.21	9.22	0.1	0.55	0.38	0.36	1.34	0.51	0.1	0.12	0	1.87	0.26	0.09	0.3	0.2	0.07	0	0.46	0.15	0.14	0.16	3.02	0.15	0.79	14.44	0.46	0.36	1.41	0.42	0.65
1581	FBtr0081991	protein_coding_gene	FBgn0003165	pum	pumilio	CG9755	mRNA	FBtr0081991	pum-RD		0.31	0.19	0.46	0	0	0.05	0	0	0	0.6	0	0	0.06	0	0.68	4.62	0.03	0	0	0.04	0	0	0	0	0.18	0	0	0.31	0	0	0.22	0	0	0.19	0	0	0	0	0
1582	FBtr0081992	protein_coding_gene	FBgn0003165	pum	pumilio	CG9755	mRNA	FBtr0081992	pum-RC		0	0	0	0.34	0	0	0	0	0	0	0	0	0	0	0	0	0	0	0	0	0	0	0	0	0	0	0	0	0	0	0	0	0	0	0	0	1.27	2.85	0
1583	FBtr0081993	protein_coding_gene	FBgn0003165	pum	pumilio	CG9755	mRNA	FBtr0081993	pum-RB		68.33	60.97	141.2	105.92	0	97.46	207.4	47.55	23.54	72.02	7.28	63.42	0.74	112.62	0	99.69	70.8	72.31	6.21	0	19.04	59.84	102.8	126.48	0	130.6	0	68.9	50.12	55.23	2.02	34.18	10.87	18.86	1.79	233.43	0	0.16	0
1584	FBtr0081994	protein_coding_gene	FBgn0003165	pum	pumilio	CG9755	mRNA	FBtr0081994	pum-RE		1.61	0.55	0	4.03	0	1.12	0.61	6.98	0	0.62	0.04	0.04	0	0	0	1.74	0	0	0.08	0.48	0	0	0.02	0.12	0	0	0.21	0.14	0	0	0	0	0.05	0.19	0.16	0	0	0	0
1585	FBtr0305197	protein_coding_gene	FBgn0003165	pum	pumilio	CG9755	mRNA	FBtr0305197	pum-RF		35.08	10.87	128.84	64.46	0	2.1	5.88	6.62	7.6	5.51	0.31	0	0	0	4.75	6.4	0	0	0	0.11	0.06	0.06	0	0	0	0	3.23	7.34	0.13	0.16	0	0.11	1.45	0	1.93	0.13	0	0	0.46
1586	FBtr0333667	protein_coding_gene	FBgn0003165	pum	pumilio	CG9755	mRNA	FBtr0333667	pum-RG		53.6	58.92	67.87	57.04	40.3	17.31	58.21	63.92	29.03	53.47	23.52	18.01	130.28	124.28	83.51	87.84	54.42	9.16	23.37	51.49	52.5	86.77	45.26	114.04	118.81	64.9	43.48	65.92	33.04	42.34	79.89	24.23	53.82	33.9	86.87	30.17	5.76	4.61	7.22
1587	FBtr0333668	protein_coding_gene	FBgn0003165	pum	pumilio	CG9755	mRNA	FBtr0333668	pum-RH		51.51	88.44	44.89	241.51	547.58	262.69	210.96	148.73	76.78	105.01	32.78	414.57	485.63	329.29	132.95	41.34	50.77	54.76	197.57	226.72	297.09	367.3	126.22	242.14	649.62	287.12	237.31	130.58	237.09	40.26	17.02	43.32	348.6	640.62	302.26	479.08	2.05	1.68	1.35
1588	FBtr0082977	protein_coding_gene	FBgn0003169	put	punt	CG7904	mRNA	FBtr0082977	put-RA		8.84	9.87	6.13	0	0	11.06	0	1.56	0	8.32	1.67	1.06	0	0	6.65	0	0	0	2.22	0	0	0	0	0.17	58.1	0	0	0.39	2.41	5.13	0	0	8.15	1.27	0	0	0	0.1	0
1589	FBtr0330227	protein_coding_gene	FBgn0003169	put	punt	CG7904	mRNA	FBtr0330227	put-RB		8.84	9.87	6.13	0	0	11.06	0	1.56	0	8.32	1.67	1.06	0	0	6.65	0	0	0	2.22	0	0	0	0	0.17	58.1	0	0	0.39	2.41	5.13	0	0	8.15	1.27	0	0	0	0.1	0
1590	FBtr0334030	protein_coding_gene	FBgn0003169	put	punt	CG7904	mRNA	FBtr0334030	put-RC		24.94	29.21	23.01	11.72	7.3	7.21	14.64	30.24	7.72	14.59	8.91	5.88	3.39	13.62	11.56	5.15	11.87	7.03	12.07	1.23	24.65	14.78	34.26	59.1	20.22	4.02	35.22	6.54	0.27	5.8	12.63	9.89	19.66	0.28	37.57	29.21	0.57	1.15	0.45
1591	FBtr0332461	protein_coding_gene	FBgn0003174	pwn	pawn	CG11101	mRNA	FBtr0332461	pwn-RB		0	0	0	0	0	0	0	0	0	0	0	0.02	0	0	0	0	0	0	0	0	0	0	0	0	0	0	0	0	0	0	0	0	0	0	0	0	0	0	0
1592	FBtr0332462	protein_coding_gene	FBgn0003174	pwn	pawn	CG11101	mRNA	FBtr0332462	pwn-RC		0	0	0	0	0	0	0	0	0	0	0.06	0	0	0	0	0	1.7	0	0.08	0	0.35	0	0	0	0	0	0	0	0	0	0	0	0	0.41	0	0	0	0	0
1593	FBtr0071838	protein_coding_gene	FBgn0003175	px	plexus	CG4444	mRNA	FBtr0071838	px-RA		0	0	0	0	0	0	0	0	0	0	0	0	0	0	0	0	0	0	0	0	0	0	0	0	0	4.35	0	0	0.98	0	0	0	0	0	0	0	0	0	0
1594	FBtr0112820	protein_coding_gene	FBgn0003175	px	plexus	CG4444	mRNA	FBtr0112820	px-RB		0.08	0.5	0.82	3.43	0	0	0	0	0	0	0.85	0.23	0.54	0	0	0	1.79	0	0.07	0	0.26	0.19	0.03	0	0.33	0.26	0	0	0	0	0	0.1	0.63	11.45	0	0	0	0	1.86
1595	FBtr0331941	protein_coding_gene	FBgn0003175	px	plexus	CG4444	mRNA	FBtr0331941	px-RD		52.05	78.78	69.62	50.43	136.6	129.2	15.81	34.43	25.65	22.46	7.97	1.73	5.97	20.77	59.89	47.67	10.05	6.21	0	0.58	35.11	14.55	13.55	4.24	0.1	0	23.36	94.47	12.24	102.27	95.3	25.75	117.88	6.33	38.27	34.43	1.94	0.56	1.64
1596	FBtr0331942	protein_coding_gene	FBgn0003175	px	plexus	CG4444	mRNA	FBtr0331942	px-RE		21.26	21.92	16.84	8.95	0	0	5.96	27.68	3.51	2.21	13.56	14.2	7.09	10.31	8.69	3.39	0	22.25	0	0	29.69	64.94	3.8	66.84	0	42.72	40.28	8.84	0	52.13	23.01	18.07	17.1	30.5	31.89	112.1	0	0	0
1597	FBtr0479815	protein_coding_gene	FBgn0003175	px	plexus	CG4444	mRNA	FBtr0479815	px-RF		19.77	26.31	23.35	17.82	20.48	28.08	30.79	13.32	13.45	18.57	0.76	33.01	34.87	55.97	13.98	20.72	6.29	3.56	21.74	28.25	6.06	0	25.7	3.58	55.01	0	0	8.55	25.78	0	1.65	10.27	29.85	13.28	7.61	0	0.5	1.23	0.92
1598	FBtr0479816	protein_coding_gene	FBgn0003175	px	plexus	CG4444	mRNA	FBtr0479816	px-RG		19.77	26.31	23.35	17.82	20.48	28.08	30.79	13.32	13.45	18.57	0.76	33.01	34.87	55.97	13.98	20.72	6.29	3.56	21.74	28.25	6.06	0	25.7	3.58	55.01	0	0	8.55	25.78	0	1.65	10.27	29.85	13.28	7.61	0	0.5	1.23	0.92
1599	FBtr0080996	protein_coding_gene	FBgn0003187	qua	quail	CG6433	mRNA	FBtr0080996	qua-RA		0	0	0	0	0	0	0	0	0.61	0	0	0.69	0	0	0	14.44	0.04	7.74	0	0	0	0	0	0	0.04	0	0	0	0	0	0	0	0	0	0	0	0	0	0
1600	FBtr0080997	protein_coding_gene	FBgn0003187	qua	quail	CG6433	mRNA	FBtr0080997	qua-RB		0	0	0	0	0	0	0	0	0	0	0.04	0	0	0	0	0	0	0	0	0	0	0	0	0	0	0	0	0	0	0	0	0	0	0	0	0	0	0	0
1601	FBtr0306165	protein_coding_gene	FBgn0003187	qua	quail	CG6433	mRNA	FBtr0306165	qua-RC		0	0	0	0	0	0	0	0	0	0	0	0	0	0	0	1.91	0	0	0	0	0	0	0	0	0	0	0	0	0	0	0	0	0	0	0	0	0	0	0
1602	FBtr0089734	protein_coding_gene	FBgn0003189	r	rudimentary	CG18572	mRNA	FBtr0089734	r-RA		0.11	0.25	0.05	0	0	0	0	0	0	0	0.24	0	0	0	0	0	0	0	0	0	0	0	0	0	0	0	0	0	0	0	0	0	0	0	0	0	0	0	0
1603	FBtr0340155	protein_coding_gene	FBgn0003189	r	rudimentary	CG18572	mRNA	FBtr0340155	r-RD		0	0	0	0	0	0.54	0.14	0	0	0.08	0	1.51	0	0	1.54	9.5	0	0	0.02	0	0.44	0	0	0	0	0	1.66	3.34	0	0.62	1.31	0.03	0.01	0	2.76	0	0	0	0
1604	FBtr0340156	protein_coding_gene	FBgn0003189	r	rudimentary	CG18572	mRNA	FBtr0340156	r-RE		0	0	0	0	0	0	0	0	0	0	0	0	0	0	0	0	0	0	0	0	0	0	0	0	0	0	0	0	0	0	0	0	0	0	0	0	0	0	0
1605	FBtr0071494	protein_coding_gene	FBgn0003204	ras	raspberry	CG1799	mRNA	FBtr0071494	ras-RC		11.12	11.82	5.88	12.43	0.04	21.42	36.14	7.28	24.97	8.82	0	0.44	0	28.6	3.17	0	0.06	4.72	0.44	0.06	0	0	0	0	0	0	0	0	0.05	10.73	0	0	2.96	0	3.29	0	7.75	3.37	17.89
1606	FBtr0071495	protein_coding_gene	FBgn0003204	ras	raspberry	CG1799	mRNA	FBtr0071495	ras-RA		0	0	0	0	0	0	0	0	0	0	0	0	0	0	0	0	0	0	0	0	0	0	0	0	0	0	0	0	0	0	0	0	7.84	0	0	0	0	0	0
1607	FBtr0332294	protein_coding_gene	FBgn0003204	ras	raspberry	CG1799	mRNA	FBtr0332294	ras-RD		0.4	1.86	0.57	0	0	0	0	1.14	0	0	4.3	0.26	0	0	3.54	14.16	0	0.34	0	0	27.05	11.48	2.11	2.39	1.01	0	7.63	1.79	0	0.22	2.19	3.69	0.6	0	35.23	2.13	0	0	0.63
1608	FBtr0343043	protein_coding_gene	FBgn0003204	ras	raspberry	CG1799	mRNA	FBtr0343043	ras-RE		0	0	1.49	0	0	0	0	0	0	0	0	0	0	0	0	0	0	0	0	0	0	0	0	0	0	1.76	0	4.5	0	0	0	0	0	0	2.26	0	0	0	0
1609	FBtr0474163	protein_coding_gene	FBgn0003204	ras	raspberry	CG1799	mRNA	FBtr0474163	ras-RF		0	0	1.49	0	0	0	0	0	0	0	0	0	0	0	0	0	0	0	0	0	0	0	0	0	0	1.76	0	4.5	0	0	0	0	0	0	2.26	0	0	0	0
1610	FBtr0082122	protein_coding_gene	FBgn0003205	Ras85D	Ras oncogene at 85D	CG9375	mRNA	FBtr0082122	Ras85D-RA		17.19	21.6	24.38	22.8	8.22	7.46	10.22	12.65	28.43	14.53	29.85	4.95	41.95	29.61	22.74	66.58	2.14	11.14	1.26	46.5	25.64	33.26	25.2	136.37	6	9.64	31.56	32.88	16.12	24.66	10.74	18.84	51.81	17.69	56.34	6.49	32.98	19.88	5.12
1611	FBtr0073212	protein_coding_gene	FBgn0003206	Ras64B	Ras oncogene at 64B	CG1167	mRNA	FBtr0073212	Ras64B-RA		25.23	17.39	2.58	7.05	0	11.52	4.4	7.37	5.2	5.52	12.48	5.17	226.5	6.17	6.95	11.03	3.16	26.44	22.5	37.93	42.72	37.56	52.94	98.8	3.4	103.55	46.17	12.63	12.23	67.92	0.67	14.14	13.18	1.35	27.72	0	4.47	12.19	19.94
1612	FBtr0079745	protein_coding_gene	FBgn0003209	raw	raw	CG12437	mRNA	FBtr0079745	raw-RB		16.26	7.62	6.31	0.3	6.15	0	44.47	2.26	0	1.49	2.05	0	0	0	4.59	35.26	2.06	0.14	14.34	0	8.21	0	0.56	6.78	27.01	0	1.07	1.6	0	2.62	0	1.49	17.06	2.99	1.1	16.64	0	0	0
1613	FBtr0079746	protein_coding_gene	FBgn0003209	raw	raw	CG12437	mRNA	FBtr0079746	raw-RA		0	0	0	0	0	0	0	0	0	0	0	0	2.82	0	0	0	0	0	0	0	0	0	0	0	0	0.11	0	0	0	0	0	0	0	0	0	0	0	0	0
1614	FBtr0303868	protein_coding_gene	FBgn0003209	raw	raw	CG12437	mRNA	FBtr0303868	raw-RC		0.39	2.04	0	0	0	0	0	0.12	0	1.34	0.35	0	0	0	0	0	0	0	0	0	0	0	0.07	0	0	0	1.13	0.62	0	0	0	0	0	0	0	0	0	0	0
1615	FBtr0340231	protein_coding_gene	FBgn0003209	raw	raw	CG12437	mRNA	FBtr0340231	raw-RD		0	0.26	0	0	0	0	0	0	1.83	0	0	0	0	0	12.27	0	0	0	0	0	0	0	0	10.15	0	0	0	0	0	0	0	0	0	0	0	0	0	0	0
1616	FBtr0340232	protein_coding_gene	FBgn0003209	raw	raw	CG12437	mRNA	FBtr0340232	raw-RE		14.19	19.16	18.19	8.17	0.09	2.15	2.36	11.22	15.18	22.21	5.09	0	7.47	292.17	15.86	5.76	0	8.87	3.07	1.48	10.81	12.48	14.32	16.88	47.32	0	26.4	7.79	14.78	4.14	8.42	14.13	22.06	0	15.74	0.41	0	0	0
1617	FBtr0070702	protein_coding_gene	FBgn0003210	rb	ruby	CG11427	mRNA	FBtr0070702	rb-RA		3.27	2.12	2.92	1.69	5	0.43	0	7.3	0.75	0.9	7.07	0.22	0.26	0	0.39	11.74	0.25	8.18	0	0	3.37	4	2.98	4.85	4.17	1.3	3.09	1.85	0	2.21	1.54	8.74	1.73	0	10.99	0.39	0	0.66	0
1618	FBtr0332290	protein_coding_gene	FBgn0003210	rb	ruby	CG11427	mRNA	FBtr0332290	rb-RC		0	0	0	0	0	46.83	3.85	0	0	0	0	1.95	0	50.99	1.63	0	0	0	6.89	0.75	0	0	0	0	0	0	0	0	1.68	0	0	0	0	0	0	1.27	3.77	0	0
1619	FBtr0343568	protein_coding_gene	FBgn0003210	rb	ruby	CG11427	mRNA	FBtr0343568	rb-RD		6.37	12.89	3.74	9.05	10.6	0	0	5.24	30.77	5.71	0	0	0	1.09	14.02	0	0	0.02	0	0	6.32	0	0	0	0	0	0	2.18	0	0	0.74	0	0	0	0	0	0	0	0
1620	FBtr0073822	protein_coding_gene	FBgn0003218	rdgB	retinal degeneration B	CG11111	mRNA	FBtr0073822	rdgB-RA		0	0.24	0.35	0	0	0	0.35	0.31	0	0.15	0	0	0	0	1.52	0.36	0	0	0	0.41	0	0	0	0	0	0	0	3.78	0	6.24	0	0	14.32	0	0	0	0.11	0	0.09
1621	FBtr0073823	protein_coding_gene	FBgn0003218	rdgB	retinal degeneration B	CG11111	mRNA	FBtr0073823	rdgB-RB		4.76	7.07	5.15	6.13	0	3.86	0.59	9.24	1.15	10.6	0	9.13	0	0	3.03	0	0	1.98	0	2.77	3.41	3.84	0.69	5.76	6.75	0	3.73	0	1.23	1.62	5.58	1.08	0	4.12	3.06	15.74	0	0	1.37
1622	FBtr0100194	protein_coding_gene	FBgn0003218	rdgB	retinal degeneration B	CG11111	mRNA	FBtr0100194	rdgB-RC		0.44	0	0	3.64	0	0	0	0	0	0	0	0	0	0	0	0	0	0.29	0	0	0	0	0	0	0	0	0	0	0	0	0	0	5.2	0	0	0	0	0	0
1623	FBtr0100195	protein_coding_gene	FBgn0003218	rdgB	retinal degeneration B	CG11111	mRNA	FBtr0100195	rdgB-RD		0	0	0	0	0	0	0	0	0	0	0.84	28.94	0	0	0	0	0	0	0	0	4.64	0	0	25.11	0	0	0	0	0	0	3.69	2.12	0.01	15.68	5.55	0	0	0.76	0
1624	FBtr0301532	protein_coding_gene	FBgn0003218	rdgB	retinal degeneration B	CG11111	mRNA	FBtr0301532	rdgB-RE		14.43	19.09	13.92	28.52	32.21	38.05	7.01	29.55	13.75	17.4	5.91	3.07	19.7	8.27	4.86	41.52	0.85	13.65	0.03	1.51	3.43	21.55	11.73	4.49	14.44	0.33	7.98	7.23	4.74	10.76	4.64	5.12	8.2	5.8	10.02	61.99	0.07	0	0.48
1625	FBtr0301533	protein_coding_gene	FBgn0003218	rdgB	retinal degeneration B	CG11111	mRNA	FBtr0301533	rdgB-RF		0	0	0	0	0	0	0	0	0	0	4.61	0	0	0	0	0	0	0	0	0	0	0	0	0	0	0	0	2.09	0	0	0	0	0	0	0	0	0	0	0
1626	FBtr0301534	protein_coding_gene	FBgn0003218	rdgB	retinal degeneration B	CG11111	mRNA	FBtr0301534	rdgB-RG		10.78	0.46	0	24.91	2.74	29.62	0	0	3.58	0	0	41.8	16.68	30.16	0	1.85	0.82	0.05	1.41	0	3.94	0	22.45	0.96	6.08	4.2	0	0.02	0	0	8.21	0.55	4.54	0	2.42	3.3	0	1.23	0
1627	FBtr0301535	protein_coding_gene	FBgn0003218	rdgB	retinal degeneration B	CG11111	mRNA	FBtr0301535	rdgB-RH		0	0	0	0	0	0	0	0	4.52	0	0	0	0	0	0	0	0	0	0	0	0	0	0	0	0	0	0	0	0	0	0	0	0	0	0	0	0	0	0
1628	FBtr0331716	protein_coding_gene	FBgn0003218	rdgB	retinal degeneration B	CG11111	mRNA	FBtr0331716	rdgB-RI		47.69	53.27	54.2	107.49	142.21	132.17	120.08	62.73	37.48	49.47	8.83	19.47	32.94	29.12	16.97	16.62	36.89	20.58	51.84	35.37	45.56	52.46	26.8	49.03	39.24	48.34	16.59	11.42	45.67	1.8	3.36	7.52	86.4	69.29	33.66	52.19	10.58	5.64	15.36
1629	FBtr0331717	protein_coding_gene	FBgn0003218	rdgB	retinal degeneration B	CG11111	mRNA	FBtr0331717	rdgB-RJ		0.7	0.45	0.64	0	5.02	0	0.11	0.98	1.49	1.33	0.25	0	0.16	0	0	0.07	0.14	0.05	0	0.21	1.28	0.91	0.24	0.29	0	0	0.86	0.08	0	0.15	0	0.05	0.49	0.19	0.15	0	0.09	0	0
1630	FBtr0340289	protein_coding_gene	FBgn0003218	rdgB	retinal degeneration B	CG11111	mRNA	FBtr0340289	rdgB-RK		0	0	0	0	0	0	0	0	0	0	0	0	0	0	0	0	0	0	0	0	0	0	0	0	0	0	0	0	0	0	0	0	0	0	0	0	0	0	0
1631	FBtr0083193	protein_coding_gene	FBgn0003227	rec	recombination-defective	CG31293	mRNA	FBtr0083193	rec-RA		0.45	0.44	0	0.14	0	0	0	0	0	0.84	0.9	0	5.7	0	0	1.99	0	1.01	23.62	0.19	9.63	5.5	3.71	3.66	11.18	0	0.74	0.42	0	0	0.04	0.99	3.45	0	8.13	0.2	3.08	0	0
1632	FBtr0334595	protein_coding_gene	FBgn0003227	rec	recombination-defective	CG31293	mRNA	FBtr0334595	rec-RB		0.29	0	3.07	0	0	0	0	0.75	0	0	0	0	0	0	0	0	0	0	0	0	0	0	0	0	0	0	0	0	0	0	0	0	0	0	0	0	0	0	0
1633	FBtr0081253	protein_coding_gene	FBgn0003231	ref(2)P	refractory to sigma P	CG10360	mRNA	FBtr0081253	ref(2)P-RA		0.05	8.11	4.62	0	0	73.93	0	0	13.43	0	0	0	0	0	0	56.85	3.27	0	7.2	0	0	0	0	0	0	19.79	0	0	0	6.75	0	0	0	23.28	0	0	0	0	0
1634	FBtr0100289	protein_coding_gene	FBgn0003231	ref(2)P	refractory to sigma P	CG10360	mRNA	FBtr0100289	ref(2)P-RB		54.24	50	26.94	68.56	35.3	15.28	14.76	49.76	3.11	56.67	33.66	3.73	28.46	0	48.59	3.81	16.99	17.18	0	21.22	76.59	81.91	5.11	77.55	12.77	0	141.58	74.2	12.29	20.28	46.14	38.51	25.47	2.66	55.23	0	19.33	8.19	50.63
1635	FBtr0083697	protein_coding_gene	FBgn0003248	Rh2	Rhodopsin 2	CG16740	mRNA	FBtr0083697	Rh2-RA		0	0	0	0	0	0	0	0	0	0	3.05	0	0	0	0	0	0	0	0	0	0	0	79.61	0	0	0	0	0	0	0	0	4.17	0	0	0	0	0	0	0
1636	FBtr0083876	protein_coding_gene	FBgn0003249	Rh3	Rhodopsin 3	CG10888	mRNA	FBtr0083876	Rh3-RA		0	0	0.18	0	0	0	0	0	0	0	0.2	0	0	0	0	0	0	0	0	0	0	0	0	0	0	0	0	0	0	0	0	0	0	0	0	0	0	0	0
1637	FBtr0075338	protein_coding_gene	FBgn0003250	Rh4	Rhodopsin 4	CG9668	mRNA	FBtr0075338	Rh4-RA		1.05	0.94	0	0	0	0	1.13	0	0	0.1	1.13	0	0	0	0	0	0	0	0	0	0	0	3.44	0	0	0	0	3.85	0	0	0	6.27	0.29	0	0	0	0	0	1.02
1638	FBtr0086512	protein_coding_gene	FBgn0003254	rib	ribbon	CG7230	mRNA	FBtr0086512	rib-RA		0.37	0.23	0.15	0	0	0	0.05	0.28	0	0	0.11	0	0	0	0.1	0	0.03	0	0	0	0.02	0	0.02	0	0	0	0	0	0	0	0.26	0	0.05	0	0.01	0	0	0	0
1639	FBtr0330057	protein_coding_gene	FBgn0003254	rib	ribbon	CG7230	mRNA	FBtr0330057	rib-RB		0	0	0	0	0	0	0	0	0	1.2	0	0	0	0	0	0	0	0	0	0	0	0	0	0	0	0	0	0	0	0	0	0	0	0	0	0	0	0	0
1640	FBtr0330058	protein_coding_gene	FBgn0003254	rib	ribbon	CG7230	mRNA	FBtr0330058	rib-RC		0.37	0.23	0.15	0	0	0	0.05	0.28	0	0	0.11	0	0	0	0.1	0	0.03	0	0	0	0.02	0	0.02	0	0	0	0	0	0	0	0.26	0	0.05	0	0.01	0	0	0	0
1641	FBtr0080610	protein_coding_gene	FBgn0003255	rk	rickets	CG8930	mRNA	FBtr0080610	rk-RA		0.44	0.78	1.87	0	0	0	4.58	982.42	40.58	40.07	1.49	5.3	25.07	111.76	26.21	5.35	21.9	8.12	4.07	0	9.87	0.3	4.06	15.8	6.86	47.24	0.04	0.25	0	2.07	6.98	3.86	72.3	26.32	119.27	30.1	0	0	0
1642	FBtr0113700	protein_coding_gene	FBgn0003256	rl	rolled	CG12559	mRNA	FBtr0113700	rl-RE		0	1.39	3.17	17.9	0	68.24	40.46	8.07	1.76	0	0	81.31	0.42	7.27	0	26.66	0	10.31	20.73	147.91	0	32.06	0	31.3	0	0	0	39.34	19.61	46.34	0	0	0	135.58	0	27.26	5.36	0	0
1643	FBtr0113701	protein_coding_gene	FBgn0003256	rl	rolled	CG12559	mRNA	FBtr0113701	rl-RA		23.1	18.78	26.84	6.13	33.7	9.18	2.32	24.26	8.11	14.29	3	7.22	27.37	2.35	21.55	22.45	0.48	0.99	9.44	10.83	7.89	7.56	13.2	31.88	3.86	60.32	28.29	25.4	8.62	8.31	3.61	0.52	36.21	32.61	27.16	0	1.16	0	0
1644	FBtr0113702	protein_coding_gene	FBgn0003256	rl	rolled	CG12559	mRNA	FBtr0113702	rl-RD		40.23	68.45	43.81	23.56	0.47	29.8	29.63	29.08	27.65	79.93	36.21	0	0.94	30.91	24.07	15.71	3.67	33.63	66.09	0.1	92.71	37.77	113.87	87.28	140.55	32.69	40.07	23.28	11.44	0	34.46	30.01	82.52	153.19	58.61	0	0	2.43	1.42
1645	FBtr0113703	protein_coding_gene	FBgn0003256	rl	rolled	CG12559	mRNA	FBtr0113703	rl-RC		0	0	0	0	0	0	0	0	0	0	0	0	0	0	0	0	0	0	0	0	0	0	0	0	0	0	0	0	0	0	0	0	0	0	0	0	0	0	0
1646	FBtr0329919	protein_coding_gene	FBgn0003256	rl	rolled	CG12559	mRNA	FBtr0329919	rl-RG		6.24	16.31	17.25	18.31	0	0.91	7.56	0	6.7	9.05	1.48	8.67	134.77	0	0	0	0	1.44	14.06	0.4	9.8	5.67	16.47	50.85	26.5	0	10.77	0.39	0.71	0.3	6.8	5.03	0	14.78	4.38	0	2.47	1.75	4.19
1647	FBtr0329920	protein_coding_gene	FBgn0003256	rl	rolled	CG12559	mRNA	FBtr0329920	rl-RH		8.47	12.82	12.74	3.15	38.01	5.63	12.88	25.47	17.45	13.06	1.75	0.94	20.6	15.44	9.71	19.21	21.6	3.07	4.79	1.09	6.27	11.25	10.89	34.02	19.61	17.12	12.49	10.24	5.16	5.1	5.42	10.65	10.89	1.03	9.55	1.17	0.21	0.32	0.91
1648	FBtr0345337	protein_coding_gene	FBgn0003256	rl	rolled	CG12559	mRNA	FBtr0345337	rl-RI		0	0	0	0.43	0	7.15	0	0	0	1.17	18.74	3.33	0	0	0	0	0	0.16	0	0.81	88.36	26.5	37.14	90.11	168.1	0	24.98	0	0	1.15	0	14.47	85.9	6.87	58.31	2.94	0	0	0
1649	FBtr0084038	protein_coding_gene	FBgn0003257	r-l	rudimentary-like	CG3593	mRNA	FBtr0084038	r-l-RA		0	0.05	0	0	0	0	0.06	0.07	0	0.91	2.79	0	0	0	11.02	0.67	0	0	0	0	0.23	1.39	0.04	0	0	0	0.18	0.63	0	8.48	0	0	0.81	0	0.54	0	2.09	2.54	6.46
1650	FBtr0078649	protein_coding_gene	FBgn0003261	Rm62	Rm62	CG10279	mRNA	FBtr0078649	Rm62-RC		9.32	0	0.93	6.49	0	33.67	1.52	1.04	0	0.8	0	0	0	0	0	12.65	0	0.73	0	0	0	0	0	0	0	0	0	0	0	0	0	0	0	0	0	0	0	0	0
1651	FBtr0078650	protein_coding_gene	FBgn0003261	Rm62	Rm62	CG10279	mRNA	FBtr0078650	Rm62-RD		11.57	52.66	0	6.28	20.78	32.48	0	15.19	30.72	15.92	0	0	47.67	0	0	0	0	0	0	98.08	1.02	0	0	0	17.74	0	10.98	0	0	0	64.49	6.38	3.04	34.25	0	19.24	12.74	10.5	5.53
1652	FBtr0078651	protein_coding_gene	FBgn0003261	Rm62	Rm62	CG10279	mRNA	FBtr0078651	Rm62-RB		0	0	0	3.32	0	6.91	0	0	0	0	0	0	0	0	0	0	0	0	0	0	0.75	0	0	0	0	0	0	0	0	0	0	0	0	0	0.33	0	0	0	0
1653	FBtr0078652	protein_coding_gene	FBgn0003261	Rm62	Rm62	CG10279	mRNA	FBtr0078652	Rm62-RA		0	0	1.08	3.54	0	6.97	0	0	0	0	6.51	0	0	0	0	0	0	0	0	0	0	11.35	0	42.82	0	0	0.84	0	0	0	0	10.75	6.04	0	9	0	0	0	0
1654	FBtr0078653	protein_coding_gene	FBgn0003261	Rm62	Rm62	CG10279	mRNA	FBtr0078653	Rm62-RE		0.69	4.73	0.52	0	0	0	0	12.09	6.36	0	0.39	0	0	3.61	0.86	0	0	0.81	0	0	21.78	0	1.9	1.58	0	0	2.83	5.44	0	0	0	0.76	0	0	0.8	0	0	0	0
1655	FBtr0078654	protein_coding_gene	FBgn0003261	Rm62	Rm62	CG10279	mRNA	FBtr0078654	Rm62-RF		126.85	84.8	94.44	172.26	0	26.44	50.6	113.16	44.12	81.51	16.62	37.08	0	33.23	137.8	83.23	4.65	0	0	0	10.68	8.7	5.01	9.82	1.47	95.43	35.97	51.16	11.04	57.6	70.46	28.2	2.25	0	51.58	0	0	0	0
1656	FBtr0301947	protein_coding_gene	FBgn0003261	Rm62	Rm62	CG10279	mRNA	FBtr0301947	Rm62-RH		0.94	13.19	7.46	67.92	0.01	4.1	0	11.92	3.44	20.22	0	0	0	0	0	0	0	2.73	3.17	0.03	0	0	0	0	0	0	0.02	0	0	4.84	0	0	0	0.01	0	0	0.01	0	0.01
1657	FBtr0302597	protein_coding_gene	FBgn0003261	Rm62	Rm62	CG10279	mRNA	FBtr0302597	Rm62-RI		10.69	7.04	7.58	1.4	0	6.47	0	13.04	9.9	13.28	6.45	0	0	0	39.71	0	0	0	0	0	3.83	1.11	0	2.37	0	0	0	0	0	0.28	5	6.83	1	0	12.87	0	0	0	0
1658	FBtr0309319	protein_coding_gene	FBgn0003261	Rm62	Rm62	CG10279	mRNA	FBtr0309319	Rm62-RJ		41.91	84.74	130.9	92.38	76.46	30.03	150.1	89.89	49.96	47.12	12.7	157.82	73.02	253.6	107.45	339.11	331.79	67.7	120.95	59.52	34.39	143.21	54.49	235.75	90.43	198.24	112.86	67.6	114.91	133.64	98.16	21.13	39.87	75.35	43.79	179.12	0	1.26	7.46
1659	FBtr0309320	protein_coding_gene	FBgn0003261	Rm62	Rm62	CG10279	mRNA	FBtr0309320	Rm62-RK		32.86	20.06	13.11	72.32	19.13	0.22	12.91	34.92	28.22	20.9	4.86	31.37	166.43	30.31	44.38	62.05	9.84	19.98	3.5	132.97	30.15	16.38	9.81	48.04	14.42	34.9	24.49	18.71	3.75	20.5	8.44	11.14	38.43	20.87	12.26	6.22	0	0	3.46
1660	FBtr0309321	protein_coding_gene	FBgn0003261	Rm62	Rm62	CG10279	mRNA	FBtr0309321	Rm62-RL		58.67	39.87	51.61	38.28	78.48	53.9	53.77	106.06	34.67	131.61	58.65	23.56	120.12	674.21	40.81	11.28	0	57.95	119.88	0	269.68	154.78	171.28	259.59	427.48	79.27	59.33	121.3	231.19	94.23	0	78.79	174.89	48.61	95.89	61.57	1.04	0	3.36
1661	FBtr0309322	protein_coding_gene	FBgn0003261	Rm62	Rm62	CG10279	mRNA	FBtr0309322	Rm62-RM		0.17	0	0	0	0	0	0	0	0	0	0	0	0	0	0	0	0	0	0	0	0	0	0	0	0.08	0	0	0	0	0	0	0	0.11	0	0.21	0	0	0	0
1662	FBtr0085090	protein_coding_gene	FBgn0003267	ro	rough	CG6348	mRNA	FBtr0085090	ro-RA		0	0.1	0	2.36	0	0	0	0	0	3.34	0	0	0	0	0	0	0	0.4	0	0	0	0	0	0	0.2	0	0	0	0	0	0	0	0	0	0	0	0	0.66	0
1663	FBtr0085091	protein_coding_gene	FBgn0003267	ro	rough	CG6348	mRNA	FBtr0085091	ro-RB		0	0	0	0	0	0	0	1.99	0	4.75	0.66	0	0	0	0	0	0	0	0	0	2.9	0	0	0	0	0	3.55	0	0	0	0	0.26	0	0	0	0	0	0	0
1664	FBtr0085795	protein_coding_gene	FBgn0003268	rod	rough deal	CG1569	mRNA	FBtr0085795	rod-RA		1.3	3.13	0.91	1.97	0.93	9.45	0.07	3.52	0.32	2.05	0.57	33.01	0	0.03	0.39	0	0.02	0.01	0	0	0.75	3.59	0.11	5.69	0	0	0.17	8.9	0	0	1.45	0	0	0	2.28	0	0	0	0
1665	FBtr0081081	protein_coding_gene	FBgn0003270	amos	absent MD neurons and olfactory sensilla	CG10393	mRNA	FBtr0081081	amos-RA		0.15	5.31	0	0.15	0	0	0	0.64	0	0	0	0	0	0	0	0	0	0	0	0	0	0	0	0	0	0	0	0	0	0	0	0	0	0	0	0	0	0	0
1666	FBtr0087105	protein_coding_gene	FBgn0003274	RpLP2	Ribosomal protein LP2	CG4918	mRNA	FBtr0087105	RpLP2-RA		21.05	18.78	20.48	26.32	11.93	20.61	2.08	17.07	14.73	25.13	149.46	0	0	0	29.38	78.09	2.24	8.4	14.49	5.01	52.45	220.2	13.83	0	28.83	0	90.18	12.8	25.1	14.02	72.88	34	13.7	61.69	131.24	0	1414.5	801.46	1119.43
1667	FBtr0078787	protein_coding_gene	FBgn0003275	RpII18	RNA polymerase II 18kD subunit	CG1163	mRNA	FBtr0078787	RpII18-RA		29.82	37.37	8.03	9.77	0.23	0	0	17.4	29.83	61.41	136.84	9.65	0	11.59	59.94	14.41	0.32	4.76	0	3.9	0	0	25.19	112.15	52.52	106.1	218.06	39.24	0.29	50.99	26.6	275.84	17.2	0	0	0	35.7	61.53	64.59
1668	FBtr0073542	protein_coding_gene	FBgn0003277	RpII215	RNA polymerase II 215kD subunit	CG1554	mRNA	FBtr0073542	RpII215-RA		40.11	33.82	46.45	11.57	11.64	33.21	10.72	35.77	25.92	36.76	9.08	15.2	1.4	13.94	16.31	46.45	9.09	18.97	3.55	12.54	21.86	45.59	54.76	58.11	59	5.41	17.27	39.5	39.45	30.47	37.9	8.18	13.87	14.88	36.4	9.12	1	5.04	2.44
1669	FBtr0078054	protein_coding_gene	FBgn0003278	RpI135	RNA polymerase I 135kD subunit	CG4033	mRNA	FBtr0078054	RpI135-RA		2.98	2.2	0.42	13.2	0	0	23.04	1.31	0.98	2.81	0.41	0.52	6.04	0	0.33	0	0	0	0.04	0	0	0	0.45	7.01	0	0	7.52	1.8	0.14	2.3	6.62	0	0.02	0	2.73	0	0	0	1.02
1670	FBtr0085248	protein_coding_gene	FBgn0003279	RpL4	Ribosomal protein L4	CG5502	mRNA	FBtr0085248	RpL4-RA		59.33	49.21	68.95	12.29	0	35.12	81.22	73.06	48.35	53.53	85.13	0.61	0.19	0	33.46	56.12	22.23	8.18	2.79	0	16.56	16.43	20.65	11.51	2.79	0	30.45	69.54	0.56	136.21	36.33	58.07	30.39	3.45	46.57	1.22	217.52	171.19	274.24
1671	FBtr0070562	protein_coding_gene	FBgn0003285	rst	roughest	CG4125	mRNA	FBtr0070562	rst-RA		0	0	0.07	0	0	0	0	0	0	0.05	1.73	8.01	3.43	0	0.05	0	3.41	0.52	0.08	2.75	6.98	4.73	2.11	0.37	0.72	4.63	10.67	4.24	0	9.66	10.39	0	40.5	19.68	7.2	22.76	0	0	0
1672	FBtr0343758	protein_coding_gene	FBgn0003285	rst	roughest	CG4125	mRNA	FBtr0343758	rst-RB		0	0	0	0	0	0.03	0	0	0	0	0.04	0	0	0	0	0	0	0.92	0	0.09	0	0	0	0	0	0	1.44	5.84	2.19	0	1.78	2	2.95	0	10.9	0.15	0	0	0
1673	FBtr0076146	protein_coding_gene	FBgn0003292	rt	rotated abdomen	CG6097	mRNA	FBtr0076146	rt-RA		20.61	27.74	22.89	4.83	0	6.05	7.73	4.99	5.34	11.34	1.19	1.63	0	0.13	0	0.04	0.75	0	0.04	20.77	0.94	0	0.02	27.71	0	0.91	0	0.04	2.06	0	0	2.67	0.88	0	0	0	8.89	0	0.28
1674	FBtr0072681	protein_coding_gene	FBgn0003295	ru	roughoid	CG1214	mRNA	FBtr0072681	ru-RA		0.35	0.19	0.2	0	35.75	0	18.32	0	0	0	1.86	0	0	0	0	0	0	0	0	0	0	0	1.03	0	0	0	0	2.01	0	0	0	0.49	0.98	0	5	0	0	0	0
1675	FBtr0077279	protein_coding_gene	FBgn0003300	run	runt	CG1849	mRNA	FBtr0077279	run-RA		0	0	0	0	0	0	0	0	0	0	1.33	1.69	0	0	0	0	0	0	0	0	0	0	0	0	0	0	0	0	0	0	0	0.45	0	0	0.37	0	0	0	0
1676	FBtr0304593	protein_coding_gene	FBgn0003300	run	runt	CG1849	mRNA	FBtr0304593	run-RB		0	0	0	0	0	0	0	0	0	0	0	0	0	0	0	0	0	1.74	0	0	0	0	0	0	0	0	0	0	0	0	0	0	0	0	0	0	0	0	0
1677	FBtr0345922	protein_coding_gene	FBgn0003300	run	runt	CG1849	mRNA	FBtr0345922	run-RC		0	0	0	0	0	0	0	0	0	0	0	0	0	0	0	0	0	0	0	0	0	0	0	0	0	0	0	0	0	0	0	0	0	0	0	0	0	0	0
1678	FBtr0073992	protein_coding_gene	FBgn0003301	rut	rutabaga	CG9533	mRNA	FBtr0073992	rut-RA		363.82	401.51	367.26	35.87	7.96	73.59	13.72	451.76	244	352.6	3.81	1.75	0	0.6	0	6.83	0	0	0	0	0.79	0.33	1.03	0	0	0	1.23	0	0	0.34	0	4.06	5.03	0	3.83	0	0	0	0
1679	FBtr0305581	protein_coding_gene	FBgn0003301	rut	rutabaga	CG9533	mRNA	FBtr0305581	rut-RB		0.99	0.19	0	0	0	0	0	0	0	0.17	0.56	24.17	0	0	0	0	4.23	0	0	13.61	0	21.1	0	0	0	0	0	0	0	0	12.33	0	0	0	0	0.63	0	0	0
1680	FBtr0333654	protein_coding_gene	FBgn0003301	rut	rutabaga	CG9533	mRNA	FBtr0333654	rut-RC		17.93	4.89	14.93	63.51	0	16.65	45.2	12.07	0.8	7.49	0	0	0	0	0	0	0	19.36	0	0	6.33	0.08	0	0	0	0.36	0	0	0	0	0	0	0	0	0	0	0	0	0
1681	FBtr0333655	protein_coding_gene	FBgn0003301	rut	rutabaga	CG9533	mRNA	FBtr0333655	rut-RD		1.73	11.14	6.65	263.55	96.61	96.4	345.74	9.04	2.32	7.86	4.22	0.44	8.78	5.36	15.06	1.13	2.26	9.53	0	0	2.96	0	2.18	2.79	0	0	0	4.34	0	0	6.04	0.57	0	1.4	13.98	0	0.19	1.39	0
1682	FBtr0333656	protein_coding_gene	FBgn0003301	rut	rutabaga	CG9533	mRNA	FBtr0333656	rut-RE		0	0.3	0	0	0	172.99	3.61	1.33	0	0	2.84	19.89	0	91.88	0	16.17	14.35	0	30.04	6.68	30.52	56.81	26.64	0.73	0.31	0	0	2.16	14.86	17.01	9.36	0	4.76	0	0	21.14	4.06	0	1.53
1683	FBtr0333657	protein_coding_gene	FBgn0003301	rut	rutabaga	CG9533	mRNA	FBtr0333657	rut-RF		256.51	328.36	317.96	108.69	219.36	78.44	42.06	167.68	149.58	86.86	2.95	0	52.39	0	11.19	31.62	0	0.1	1.04	0	2.19	0	11.29	3.05	0.32	17.79	7.65	1.43	3.04	9.51	0	16.12	22.15	5.47	19.09	0	0	0.45	1.13
1684	FBtr0340467	protein_coding_gene	FBgn0003301	rut	rutabaga	CG9533	mRNA	FBtr0340467	rut-RG		0	0	0	0	65.65	0	0.02	0	0	0	0	0	0	0	0	0	0	0	0	0	0	0	0	0	0	0	0	0	2.98	6.31	0	0	0	0	0	0	0	0	2.96
1685	FBtr0070889	protein_coding_gene	FBgn0003302	rux	roughex	CG4336	mRNA	FBtr0070889	rux-RA		1.89	0	0	0	0	0	0	2.6	0	1.08	2.91	0	0	0	2.26	0	0	1.03	0	0	0	0	0	0	0	0	13.69	0	0	0	0	0	0	0	1.48	0	7.72	0	2.69
1686	FBtr0307288	protein_coding_gene	FBgn0003302	rux	roughex	CG4336	mRNA	FBtr0307288	rux-RB		17.75	20.24	5.06	0	0	1.67	0.09	5.63	0.16	0	0	0.54	0	0	0	0.69	0	0	0	0	0	1.64	0.97	0	0	0	0	4.76	0	107.54	1.25	0	0.1	0	0	0	0	2.27	20.47
1687	FBtr0082704	protein_coding_gene	FBgn0003308	ry	rosy	CG7642	mRNA	FBtr0082704	ry-RA		0.6	0.02	0.03	0	0	0	0	0	0	0	0.33	0	3.3	0	0	0	0	0.67	0	0	0	0	0	0	0	0	0	0	0	0	0.02	0	0	0	0	0	0	0	0
1688	FBtr0077993	protein_coding_gene	FBgn0003310	S	Star	CG4385	mRNA	FBtr0077993	S-RB		47.16	56.3	44.73	30.61	9.92	3.89	18.46	74	65.22	47.59	42.32	73.37	78.48	125.62	53.79	12.08	66.5	68.24	172.06	50.88	112.27	210.09	157.97	119.2	106.29	85.78	61.92	50.17	15.18	19.37	20.66	89.48	82.83	55.47	80.41	203	0.65	2.62	2
1689	FBtr0077994	protein_coding_gene	FBgn0003310	S	Star	CG4385	mRNA	FBtr0077994	S-RA		3.37	0	0	0	0	0.62	0	0	0	4.36	0	0	0	0	160.41	20.91	0	0.07	0	246.81	0	3.57	0	0	0	125.97	0	0	0	79.04	23.41	0	0	405.29	0	0	0	0	0
1690	FBtr0082475	protein_coding_gene	FBgn0003312	sad	shadow	CG14728	mRNA	FBtr0082475	sad-RA		0.3	0.25	0	0	0	0	0	2.09	0	0.14	0	0	0	0	0	0	0	0	0	0	0	0	0	0	0	0	0	0	0	0	0	6.37	1.25	0	0.07	0	0	7.97	0
1691	FBtr0080237	protein_coding_gene	FBgn0003313	sala	spalt-adjacent	CG4922	mRNA	FBtr0080237	sala-RA		0	0	0	0	0	0	0	0	0	0	0	0	0	0	0	0	0	0	0	0	0	0	0	0	0	0	0	0	0	0	0	0	0	0	0	0	0	0	0
1692	FBtr0308136	protein_coding_gene	FBgn0003313	sala	spalt-adjacent	CG4922	mRNA	FBtr0308136	sala-RC		0	0	0	0	0	0	0	0	0	0	0	0	0	0	0	0	0	0	0	0	0	0	0	0	0	0	0	0	0	0	0	0	0	0	0	0	0	0	0
1693	FBtr0088832	protein_coding_gene	FBgn0003317	sax	saxophone	CG1891	mRNA	FBtr0088832	sax-RA		10.5	15.14	22.84	7.39	1.6	0	2.95	0	0	13.51	0	0.28	53.73	0	4.72	0	12.77	5.61	0	5.09	5.94	19.06	3.04	46.16	10.78	0.42	7.68	3.78	3.42	0	7.04	1.8	8.04	23.69	8.98	4.43	2.72	2.38	3
1694	FBtr0088833	protein_coding_gene	FBgn0003317	sax	saxophone	CG1891	mRNA	FBtr0088833	sax-RB		3.28	0.31	1.98	0	0	1.96	0	3.31	4.43	0	2.04	0	0	0	0	26.88	0	0	0	0	1.85	0	0	0.86	0	0	0.76	0	0	0	0	0.24	1.1	0	5.66	0	0	0	0
1695	FBtr0308825	protein_coding_gene	FBgn0003317	sax	saxophone	CG1891	mRNA	FBtr0308825	sax-RC		8.22	0	0	0	0	0	0	10.76	0	0	3.82	0	0	0	0	0	0	0	0	0	0	0	0	0	0	0	0	3.27	0	22.69	8.11	0	0	0	2.42	0	0	0	0
1696	FBtr0083250	protein_coding_gene	FBgn0003319	Sb	Stubble	CG4316	mRNA	FBtr0083250	Sb-RA		0.33	0.09	0	0	0	0	0	0.95	0	0.13	0.45	0	0	0	0	0	0	0	0	0	0.37	0	0.19	1.35	0	0	0	1.47	0	0	0	0.22	2.04	0	0.08	0	0	0	0
1697	FBtr0344008	protein_coding_gene	FBgn0003319	Sb	Stubble	CG4316	mRNA	FBtr0344008	Sb-RB		0	0	0	0	0	0	0	0	0	0	0	0	0	0	0	0	0	0	0	0	2.6	0	0	0	0	0	0	0	0	0	0	0	0	0	0	0	0	0	0
1698	FBtr0073411	protein_coding_gene	FBgn0003321	sbr	small bristles	CG1664	mRNA	FBtr0073411	sbr-RA		101.26	101.5	105.49	97.25	80.19	258.93	78.34	234.11	184.28	122.66	32.37	112.66	358.77	150.9	91.19	113.37	133.49	80.08	130.28	211.33	94.95	123.76	75.59	224.21	212.31	216.46	85.63	82.3	72.75	165.51	129.47	61.37	62.05	90.67	57.18	170.81	3.54	17.57	4.22
1699	FBtr0473367	protein_coding_gene	FBgn0003321	sbr	small bristles	CG1664	mRNA	FBtr0473367	sbr-RB		0	0	0	0	0	0	0	0	0	0	0	0	0	0	0	0	0	0	0	0	0	0	0	0	0	0	0	0	0	0	0	0	0	0	0	0	0	0	0
1700	FBtr0473368	protein_coding_gene	FBgn0003321	sbr	small bristles	CG1664	mRNA	FBtr0473368	sbr-RC		0.14	0	0.43	0	0	0.38	0	0.52	0	0	0.57	0	0	0	0	0.11	0	0	0	0	0	0	0	0	0	0.12	0	0	0	0	0.26	0.11	0	0	0.13	0	0	0.83	0.7
1701	FBtr0087855	protein_coding_gene	FBgn0003326	sca	scabrous	CG17579	mRNA	FBtr0087855	sca-RA		0	0	0	0	0	0	0	0	10.33	0	0	0	0	0	12.31	0	0	0	0	1.79	0	0	0	0	0	0	0	0	0	1.05	12.08	0	0	0	0	0	0	0	0
1702	FBtr0087856	protein_coding_gene	FBgn0003326	sca	scabrous	CG17579	mRNA	FBtr0087856	sca-RB		46.46	51.36	50.66	50.9	58.31	37.18	69.31	51.28	8.36	64.43	6.16	4	16.3	12.68	30.62	10.46	2.55	1.51	0.83	0	6.55	10.14	17.27	13.52	2.83	1.92	31.23	51.16	52.45	0	0	7.14	16.81	0.63	31.36	7.36	2.42	4.86	10.43
[truncated: 33,299 more rows]
[truncated: 16 more columns]
