# Supplementary figures and images for: Nitric oxide acts as a cotransmitter in a subset of dopaminergic neurons to diversify memory dynamics
Source: eLife journal article supplement (doi:10.7554/elife.49257), 2019-11-14

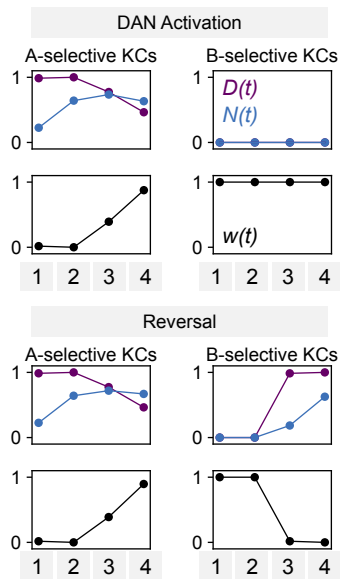

**Figure 8- figure supplement 1**

Supplement: supp [file elife-49257-supp-v1.zip]

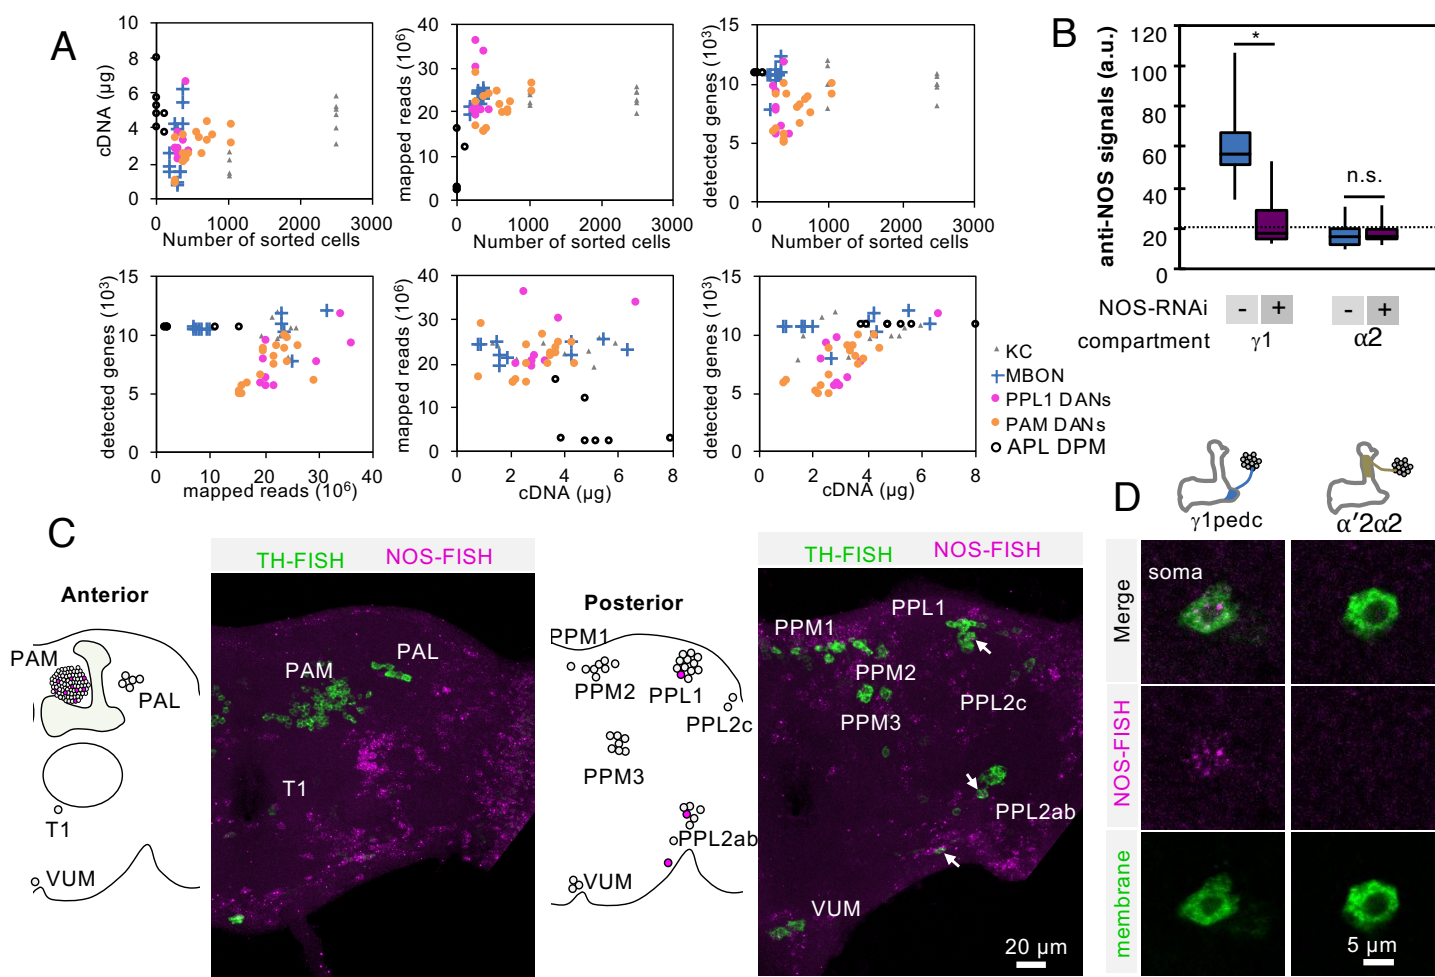

Figure 3- figure supplement 1

Supplement: supp [file elife-49257-supp-v1.zip]

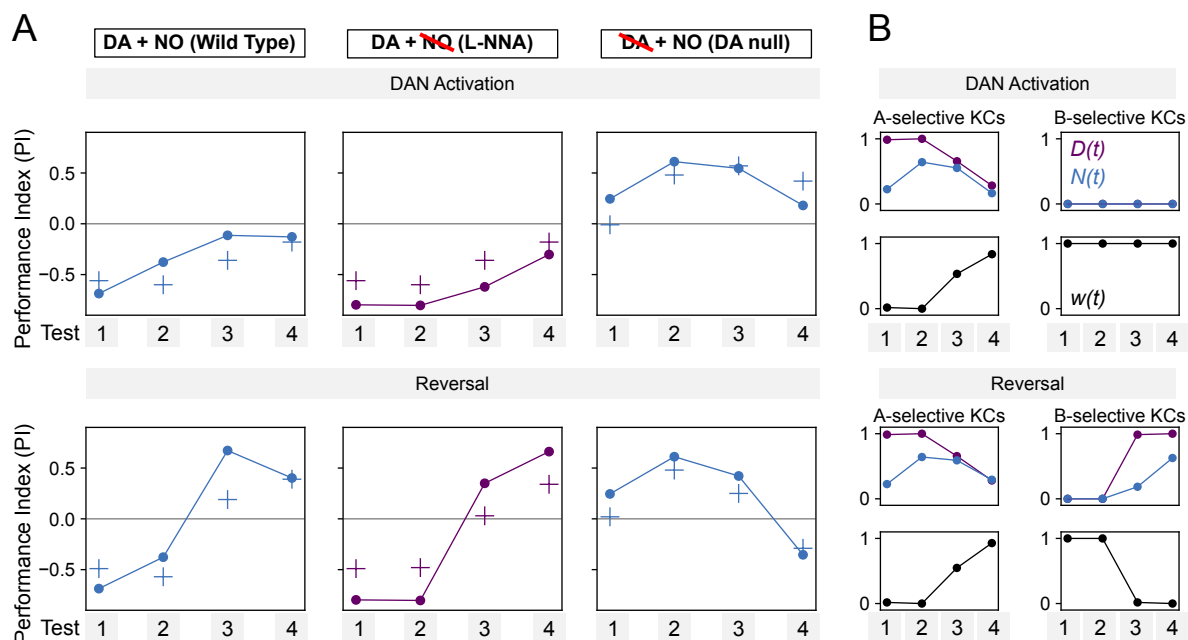

**Figure 8- figure supplement 2**

Supplement: supp [file elife-49257-supp-v1.zip]

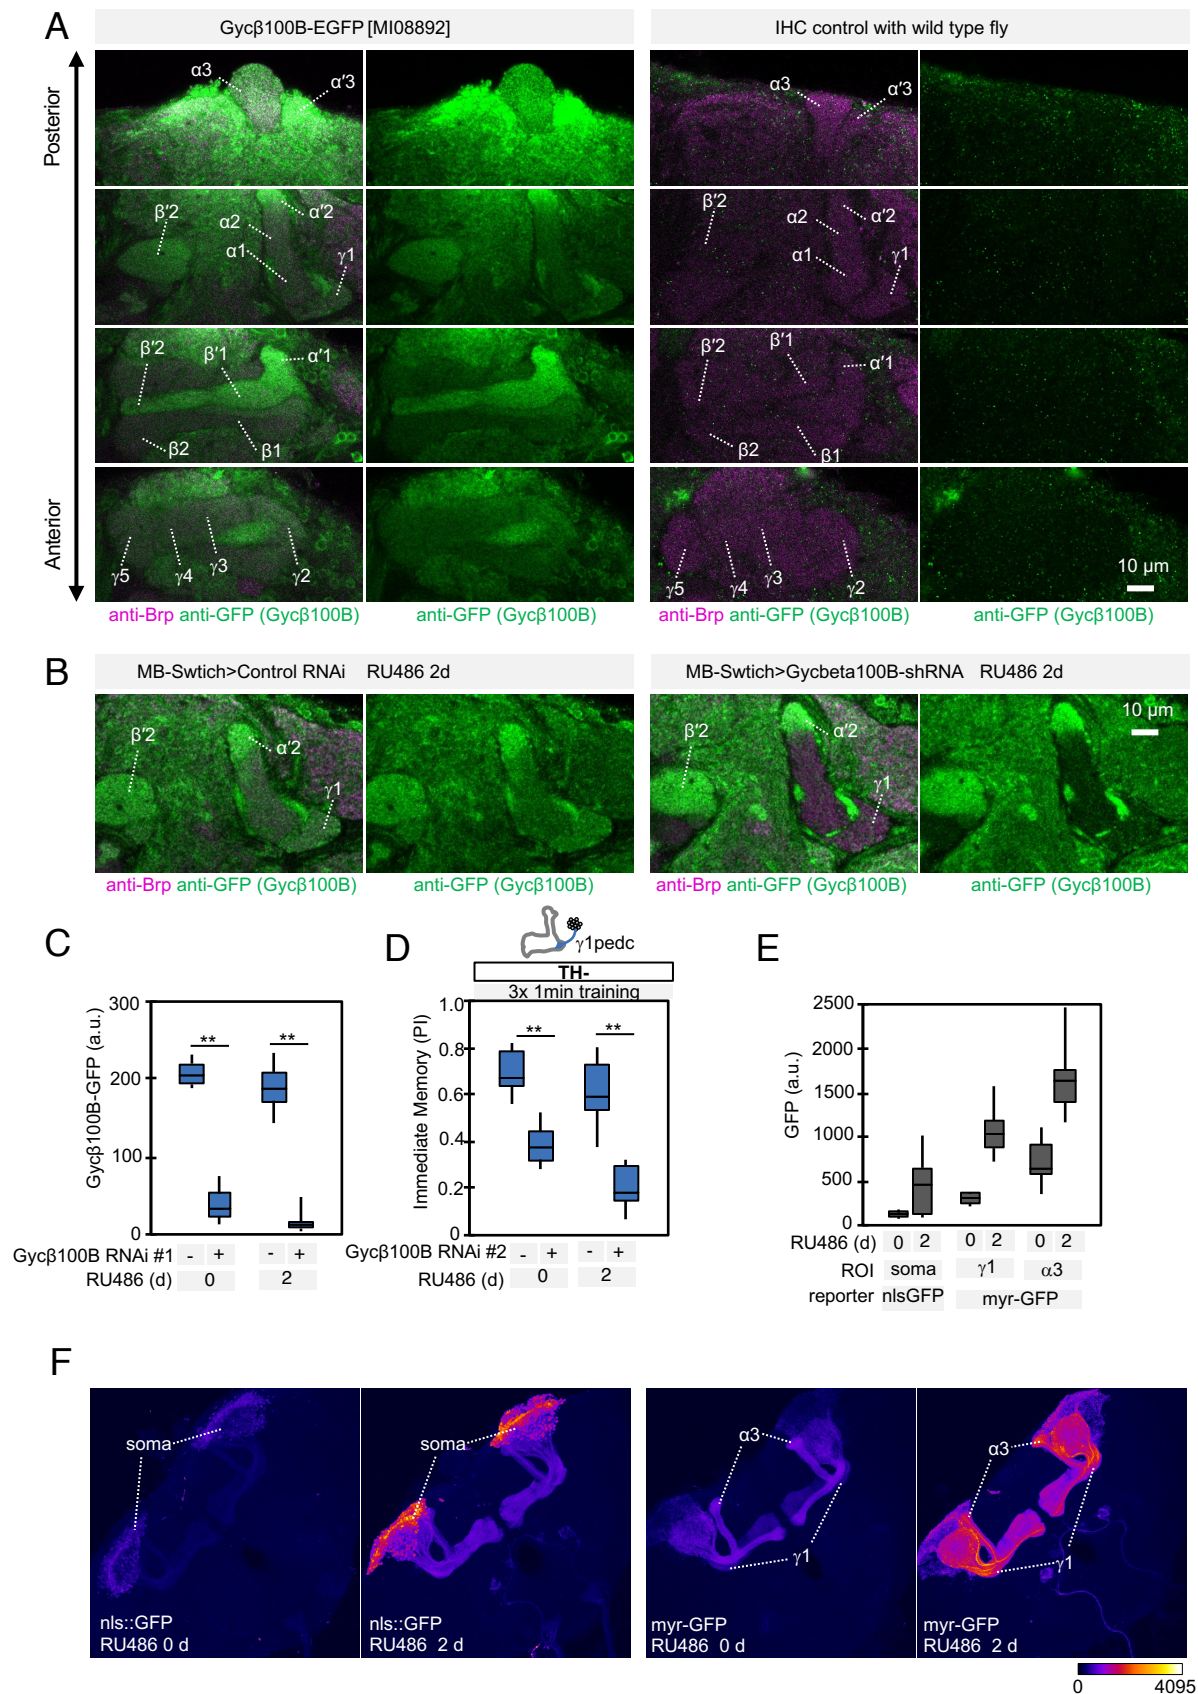

Figure 5- figure supplement 1

Supplement: supp [file elife-49257-supp-v1.zip]

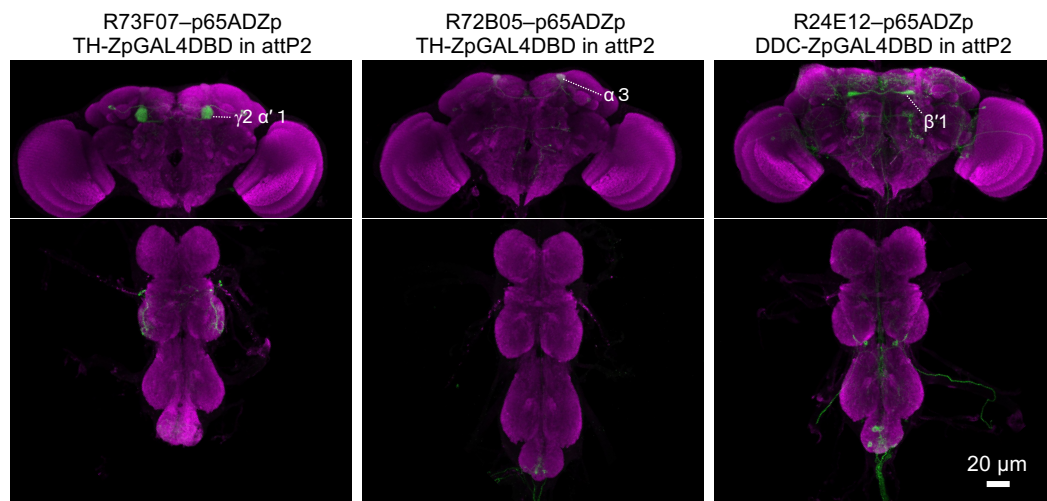

**Figure2 - figure supplement 1**

Supplement: supp [file elife-49257-supp-v1.zip]

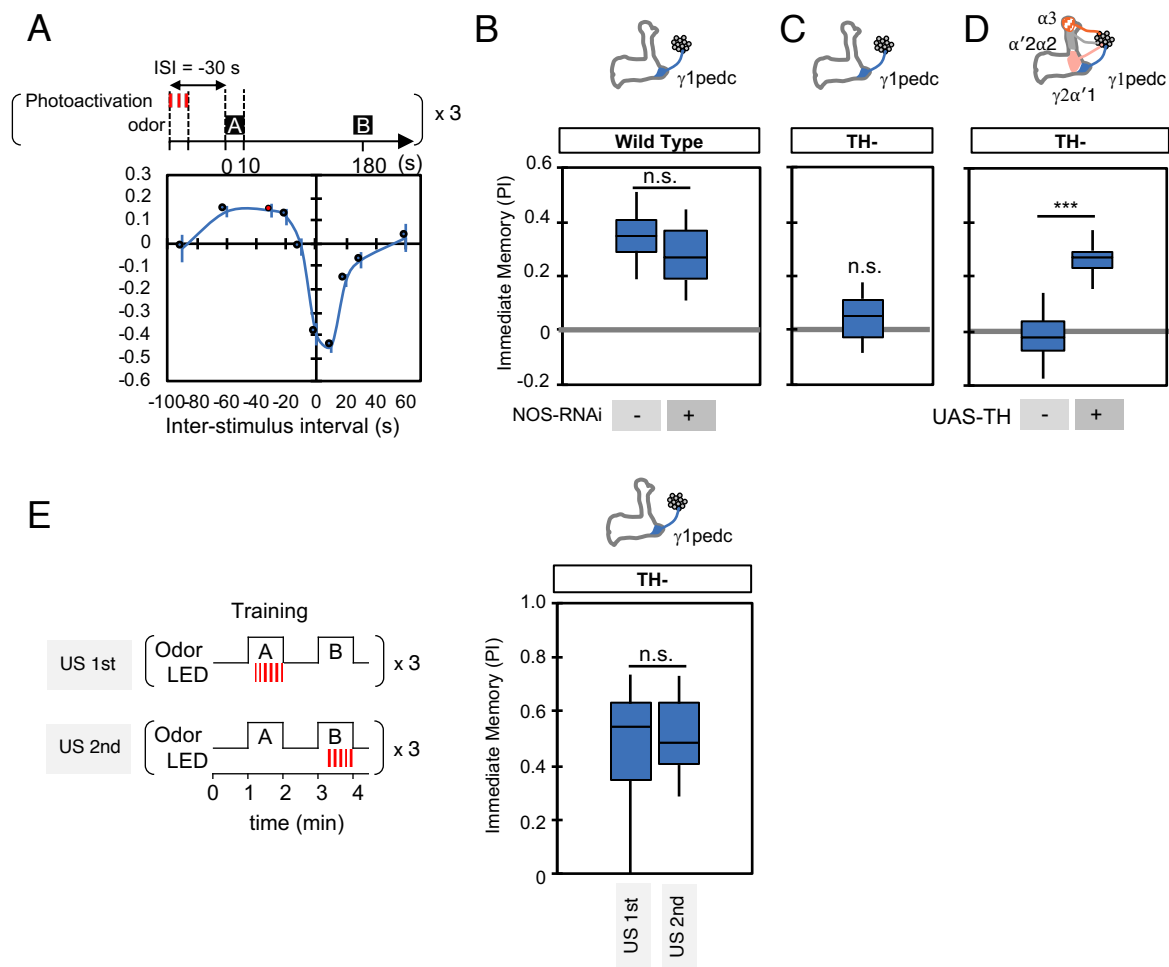

**Figure 5- figure supplement 3**

Supplement: supp [file elife-49257-supp-v1.zip]

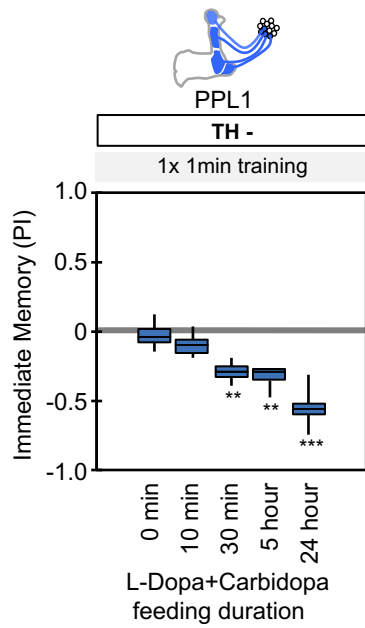

**Figure 1 - figure supplement 1**

Supplement: supp [file elife-49257-supp-v1.zip]

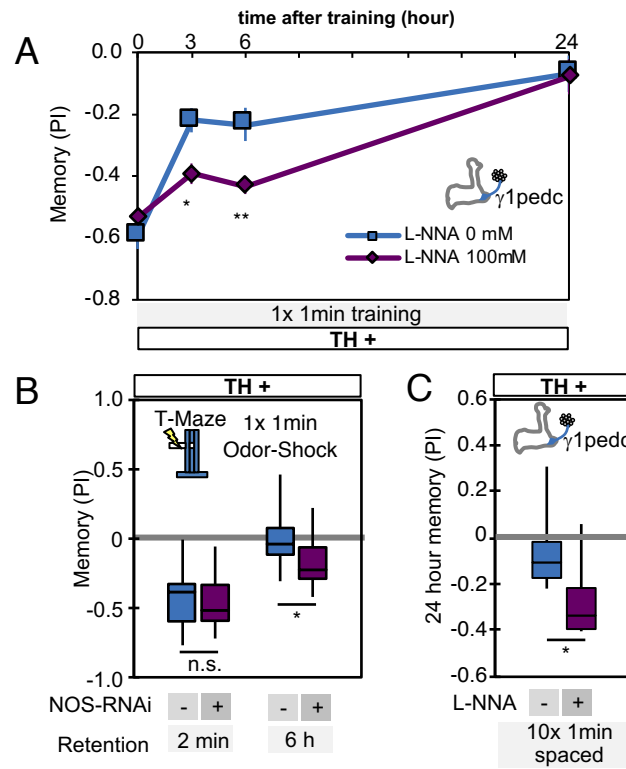

**Figure 6- figure supplement 1**

Supplement: supp [file elife-49257-supp-v1.zip]

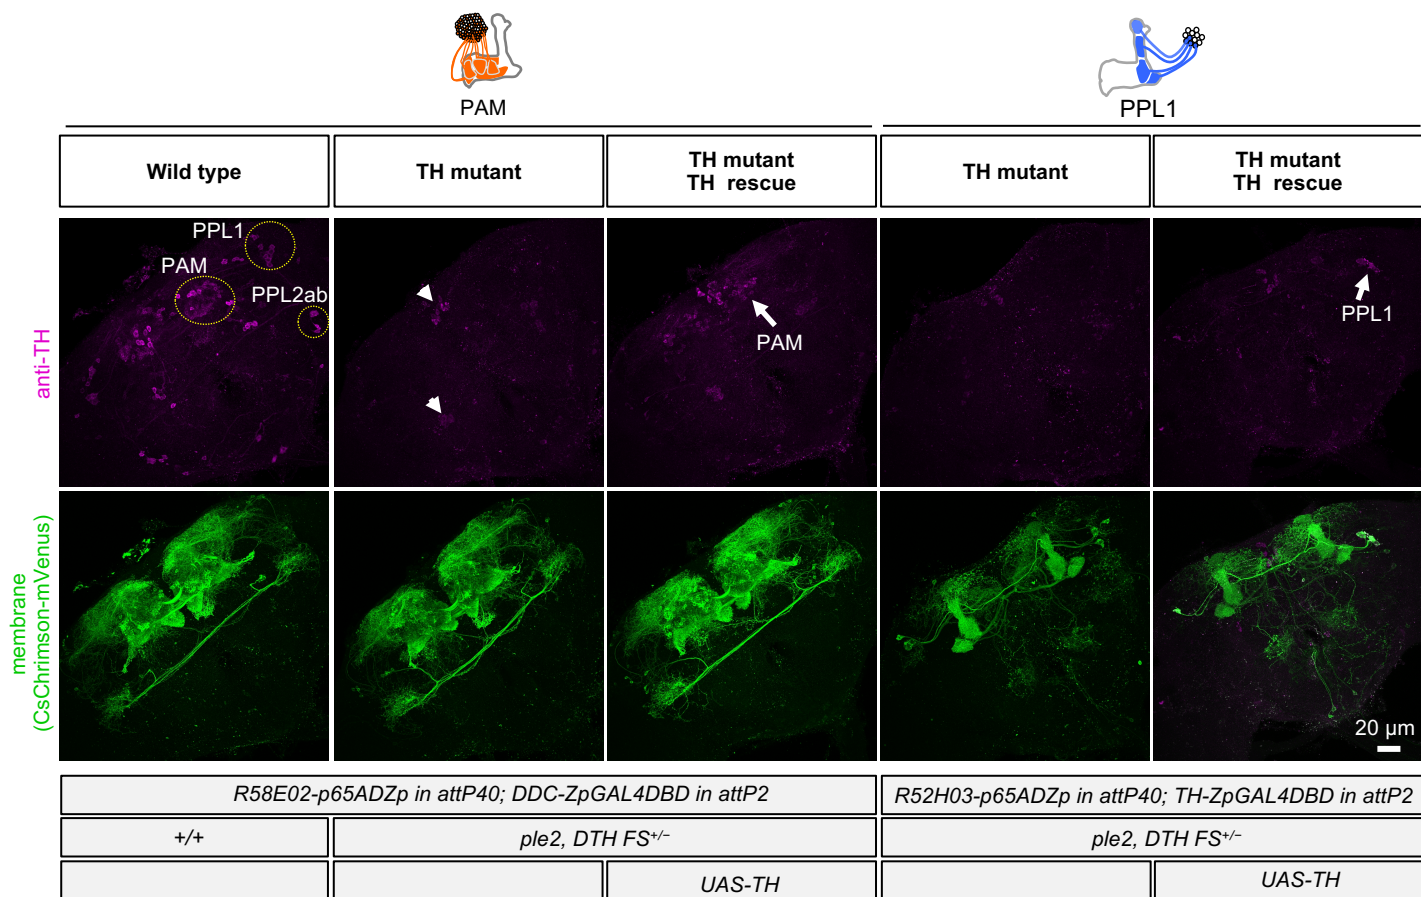

**Figure 1 - figure supplement 2**

Supplement: supp [file elife-49257-supp-v1.zip › elife_poa_e49257_Figure_1_figure_supplement_2.pdf]

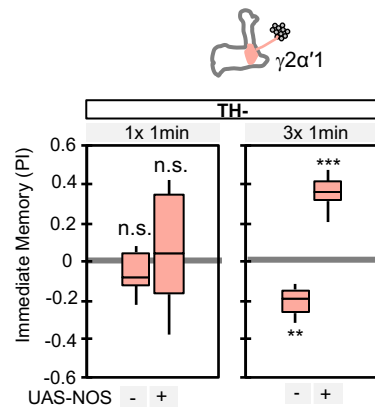

**Figure 4- figure supplement 1**

Supplement: supp [file elife-49257-supp-v1.zip › elife_poa_e49257_Figure_4_figure_supplement_1.pdf]

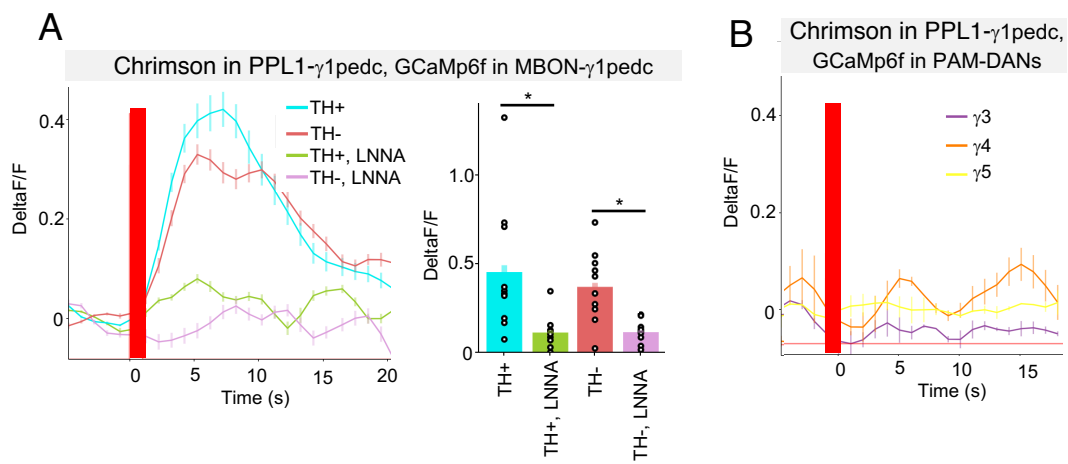

**Figure 5- figure supplement 2**

Supplement: supp [file elife-49257-supp-v1.zip › elife_poa_e49257_Figure_5_figure_supplement_2.pdf]
